# Supplementary material for: Rationalisation of Patterns of Competing Reactivity by X-ray Structure Determination: Reaction of Isomeric (Benzyloxythienyl)oxazolines with a Base
Source: MDPI journal article supplement (doi:10.3390/molecules26247690), 2021-12-20

# Rationalisation of Patterns of Competing Reactivity by X-Ray Structure Determination: Reaction of Isomeric (Benzyloxythienyl)oxazolines with Base

R. Alan Aitken\*, Andrew D. Harper and Alexandra M. Z. Slawin

EaStCHEM School of Chemistry, University of St Andrews, North Haugh, St Andrews, Fife, KY16 9ST, UK.

## Supplementary Material

## Figure

|                                                                     |          |
|---------------------------------------------------------------------|----------|
| DEPTQ $^{13}\text{C}$ NMR spectrum of <b>16</b>                     | S1       |
| DEPTQ $^{13}\text{C}$ NMR spectrum of <b>17</b>                     | S2       |
| $^1\text{H}$ NMR and DEPTQ $^{13}\text{C}$ NMR spectra of <b>18</b> | S3, S4   |
| $^1\text{H}$ NMR and DEPTQ $^{13}\text{C}$ NMR spectra of <b>9</b>  | S5, S6   |
| DEPTQ $^{13}\text{C}$ NMR spectrum of <b>19</b>                     | S7       |
| $^1\text{H}$ NMR and DEPTQ $^{13}\text{C}$ NMR spectra of <b>20</b> | S8, S9   |
| $^1\text{H}$ NMR and DEPTQ $^{13}\text{C}$ NMR spectra of <b>10</b> | S10, S11 |
| $^1\text{H}$ NMR and DEPTQ $^{13}\text{C}$ NMR spectra of <b>25</b> | S12, S13 |
| $^1\text{H}$ NMR and DEPTQ $^{13}\text{C}$ NMR spectra of <b>26</b> | S14, S15 |
| $^1\text{H}$ NMR and DEPTQ $^{13}\text{C}$ NMR spectra of <b>30</b> | S16, S17 |
| $^1\text{H}$ NMR and DEPTQ $^{13}\text{C}$ NMR spectra of <b>33</b> | S18, S19 |
| $^1\text{H}$ NMR and DEPTQ $^{13}\text{C}$ NMR spectra of <b>35</b> | S20, S21 |
| $^1\text{H}$ NMR and DEPTQ $^{13}\text{C}$ NMR spectra of <b>36</b> | S22, S23 |
| DEPTQ $^{13}\text{C}$ NMR spectrum of <b>37</b>                     | S24      |
| DEPTQ $^{13}\text{C}$ NMR spectrum of <b>39</b>                     | S25      |

|                                                                       |          |
|-----------------------------------------------------------------------|----------|
| <sup>1</sup> H NMR and DEPTQ <sup>13</sup> C NMR spectra of <b>41</b> | S26, S27 |
| <sup>1</sup> H NMR and DEPTQ <sup>13</sup> C NMR spectra of <b>42</b> | S28, S29 |
| <sup>1</sup> H NMR and DEPTQ <sup>13</sup> C NMR spectra of <b>43</b> | S30, S31 |
| <sup>1</sup> H NMR and DEPTQ <sup>13</sup> C NMR spectra of <b>13</b> | S32, S33 |
| <sup>1</sup> H NMR and DEPTQ <sup>13</sup> C NMR spectra of <b>45</b> | S34, S35 |
| <sup>1</sup> H NMR and DEPTQ <sup>13</sup> C NMR spectra of <b>18</b> | S36, S37 |
| <sup>1</sup> H NMR and DEPTQ <sup>13</sup> C NMR spectra of <b>46</b> | S38, S39 |
| <sup>1</sup> H NMR and DEPTQ <sup>13</sup> C NMR spectra of <b>47</b> | S40, S41 |

Figure S1. 125 MHz DEPTQ  $^{13}\text{C}$  NMR spectrum of **16**

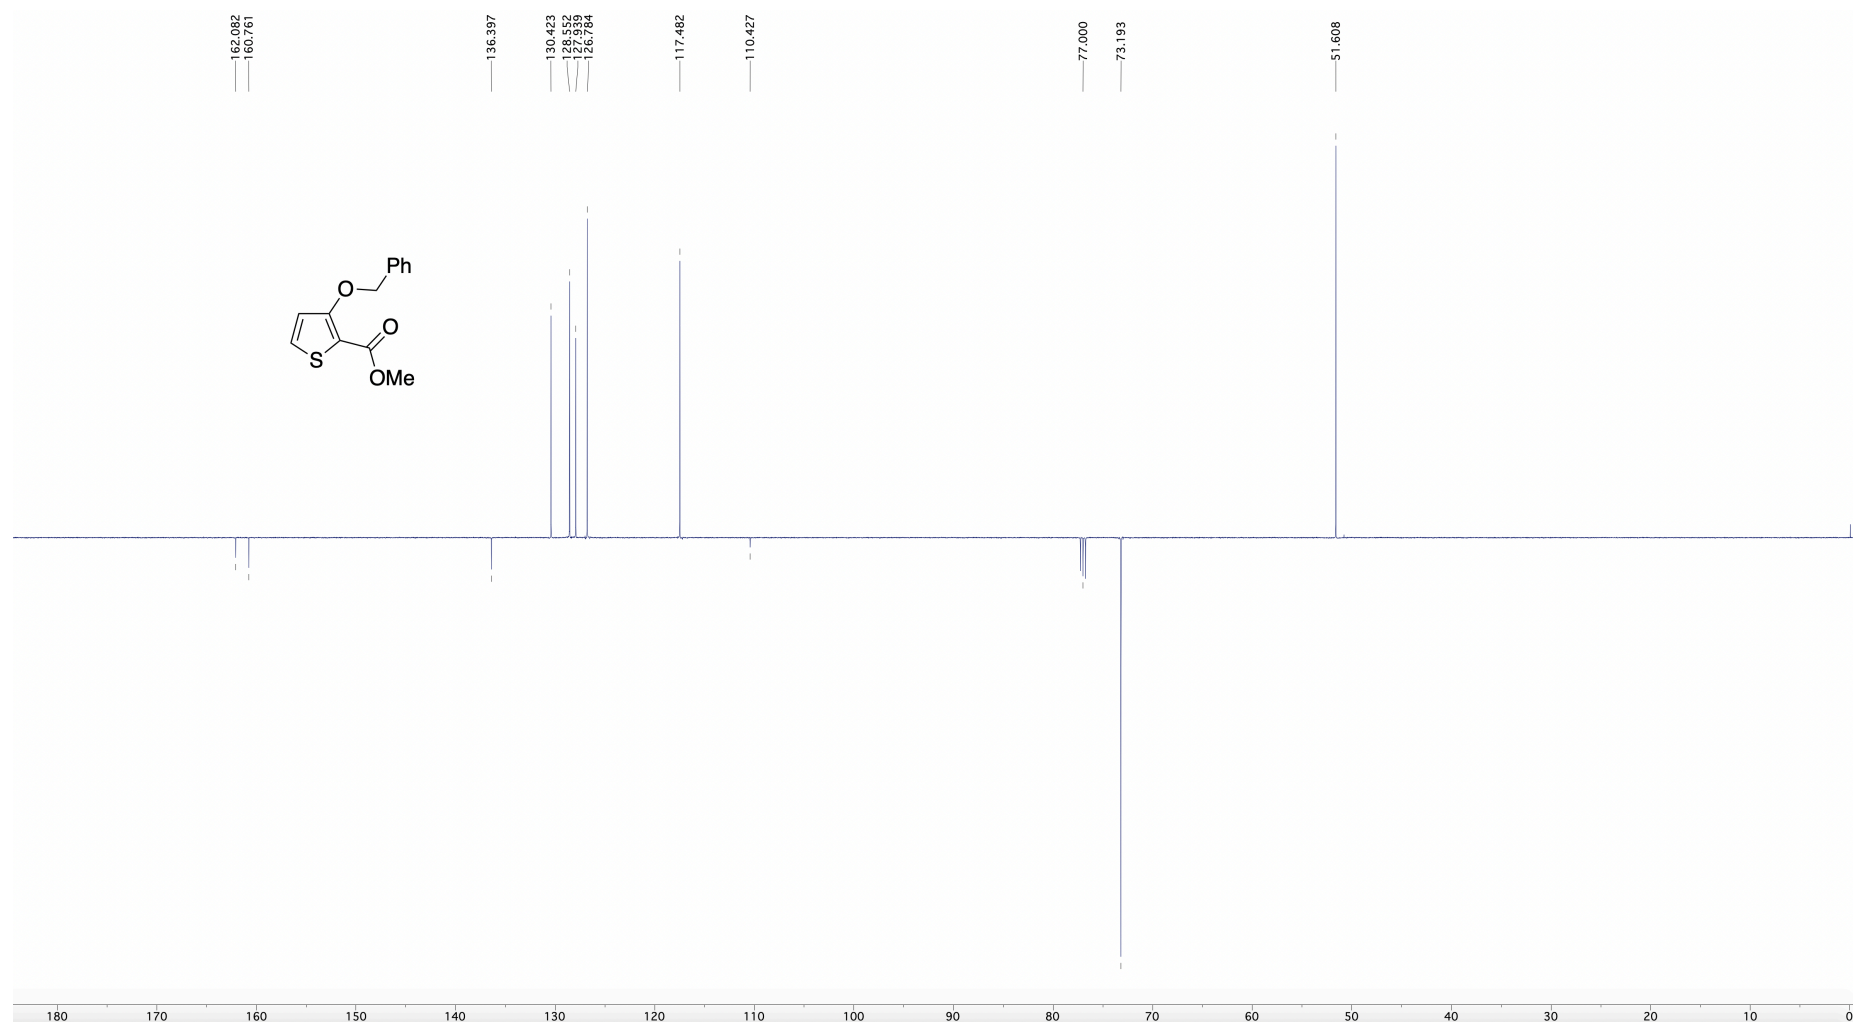

Figure S2. 100 MHz DEPTQ  $^{13}\text{C}$  NMR spectrum of **17**

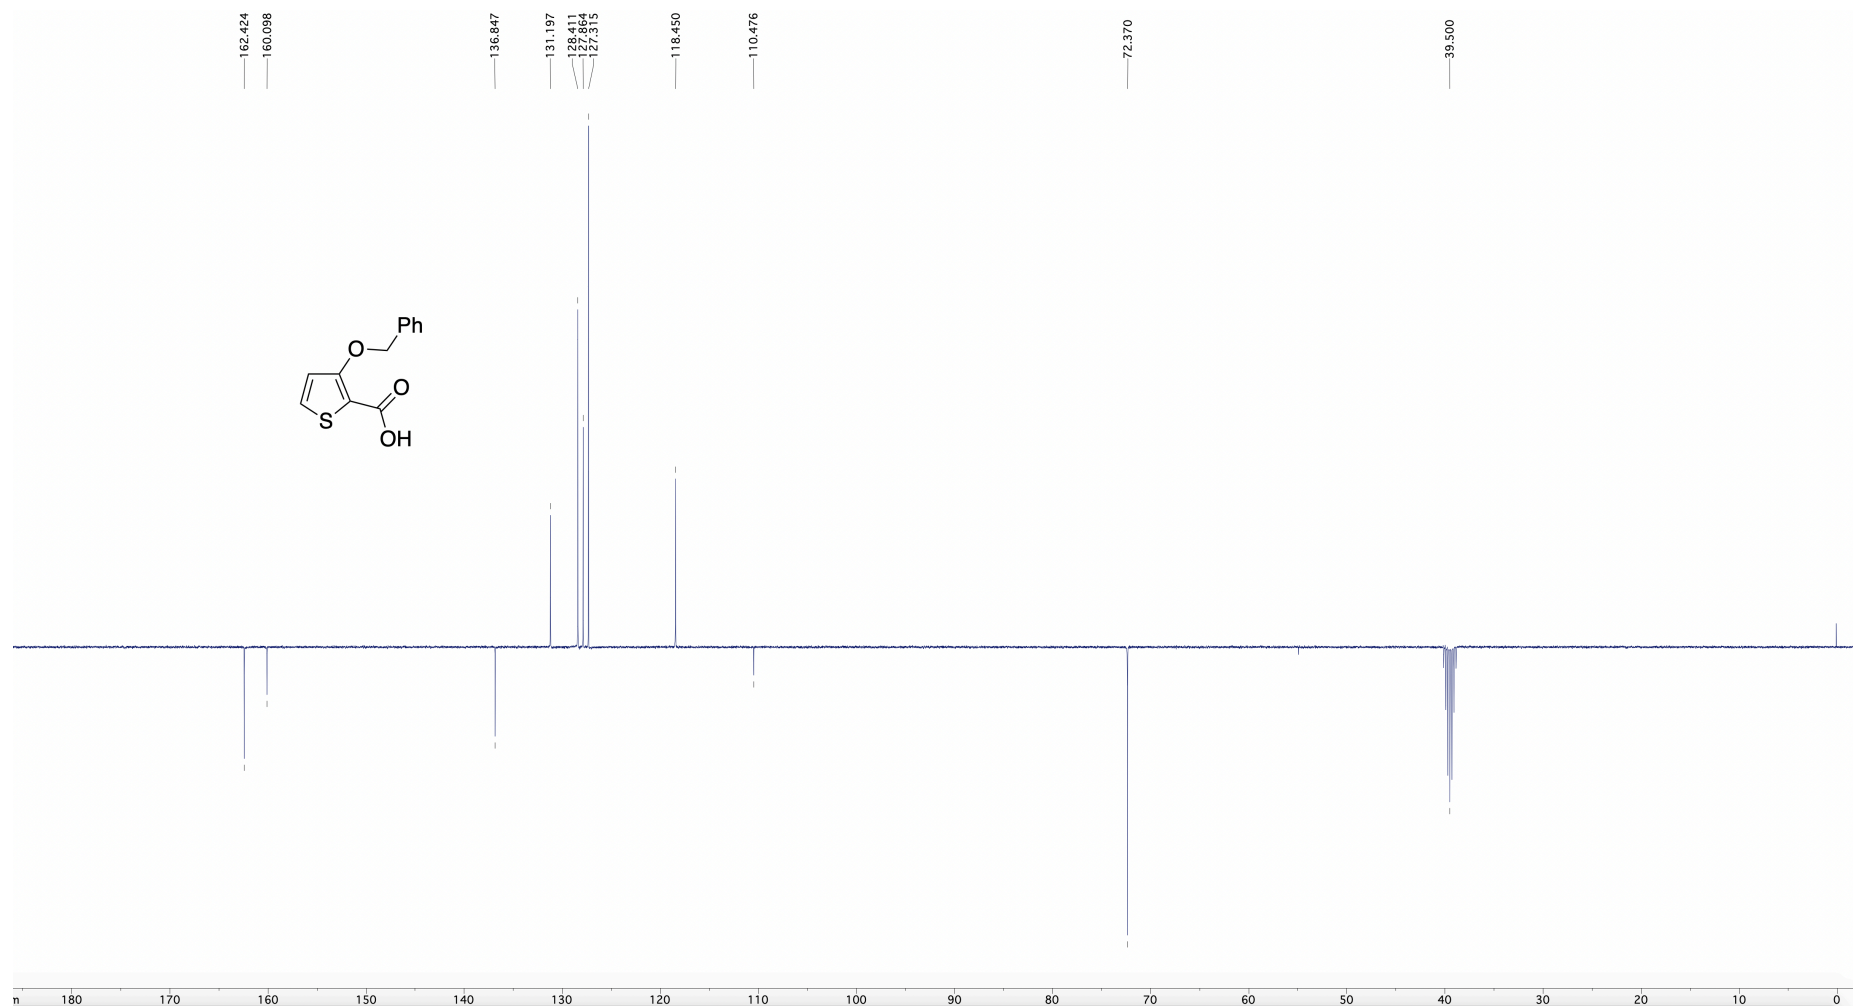

Figure S3. 500 MHz  $^1\text{H}$  NMR spectrum of **18**

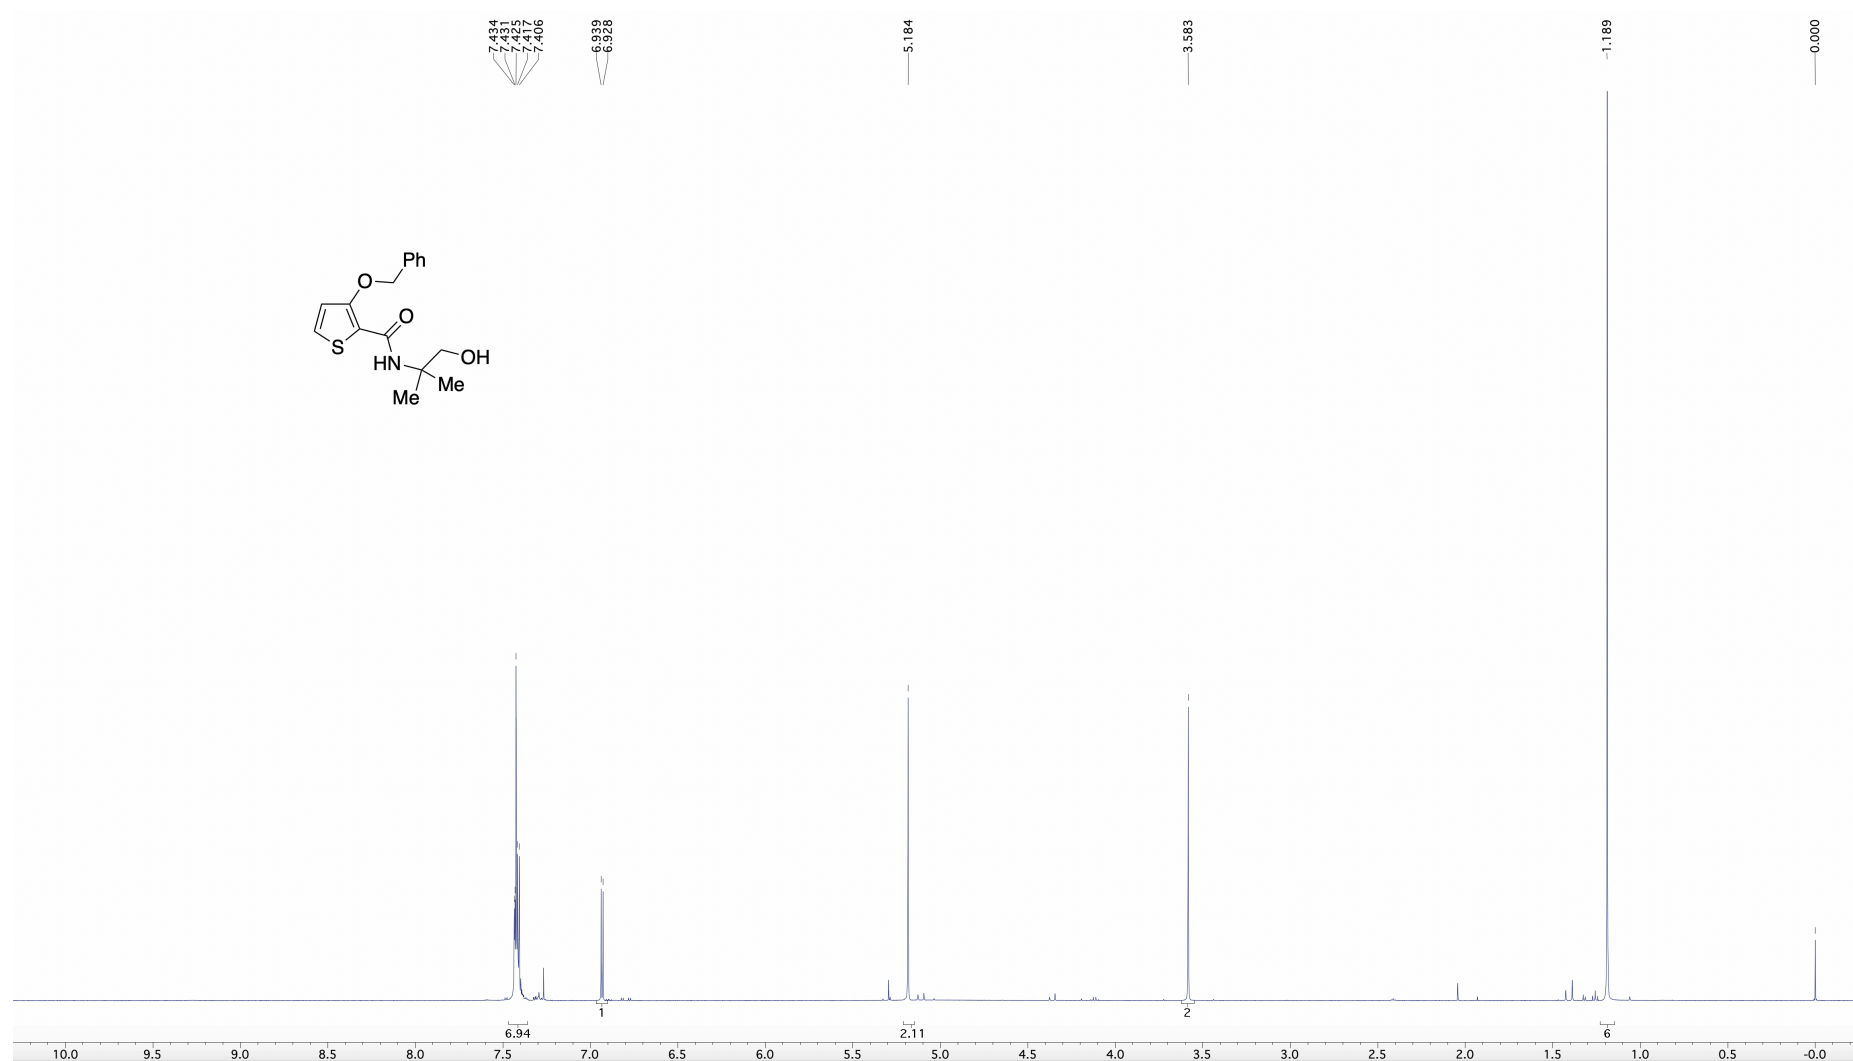

Figure S4. 125 MHz DEPTQ  $^{13}\text{C}$  NMR spectrum of **18**

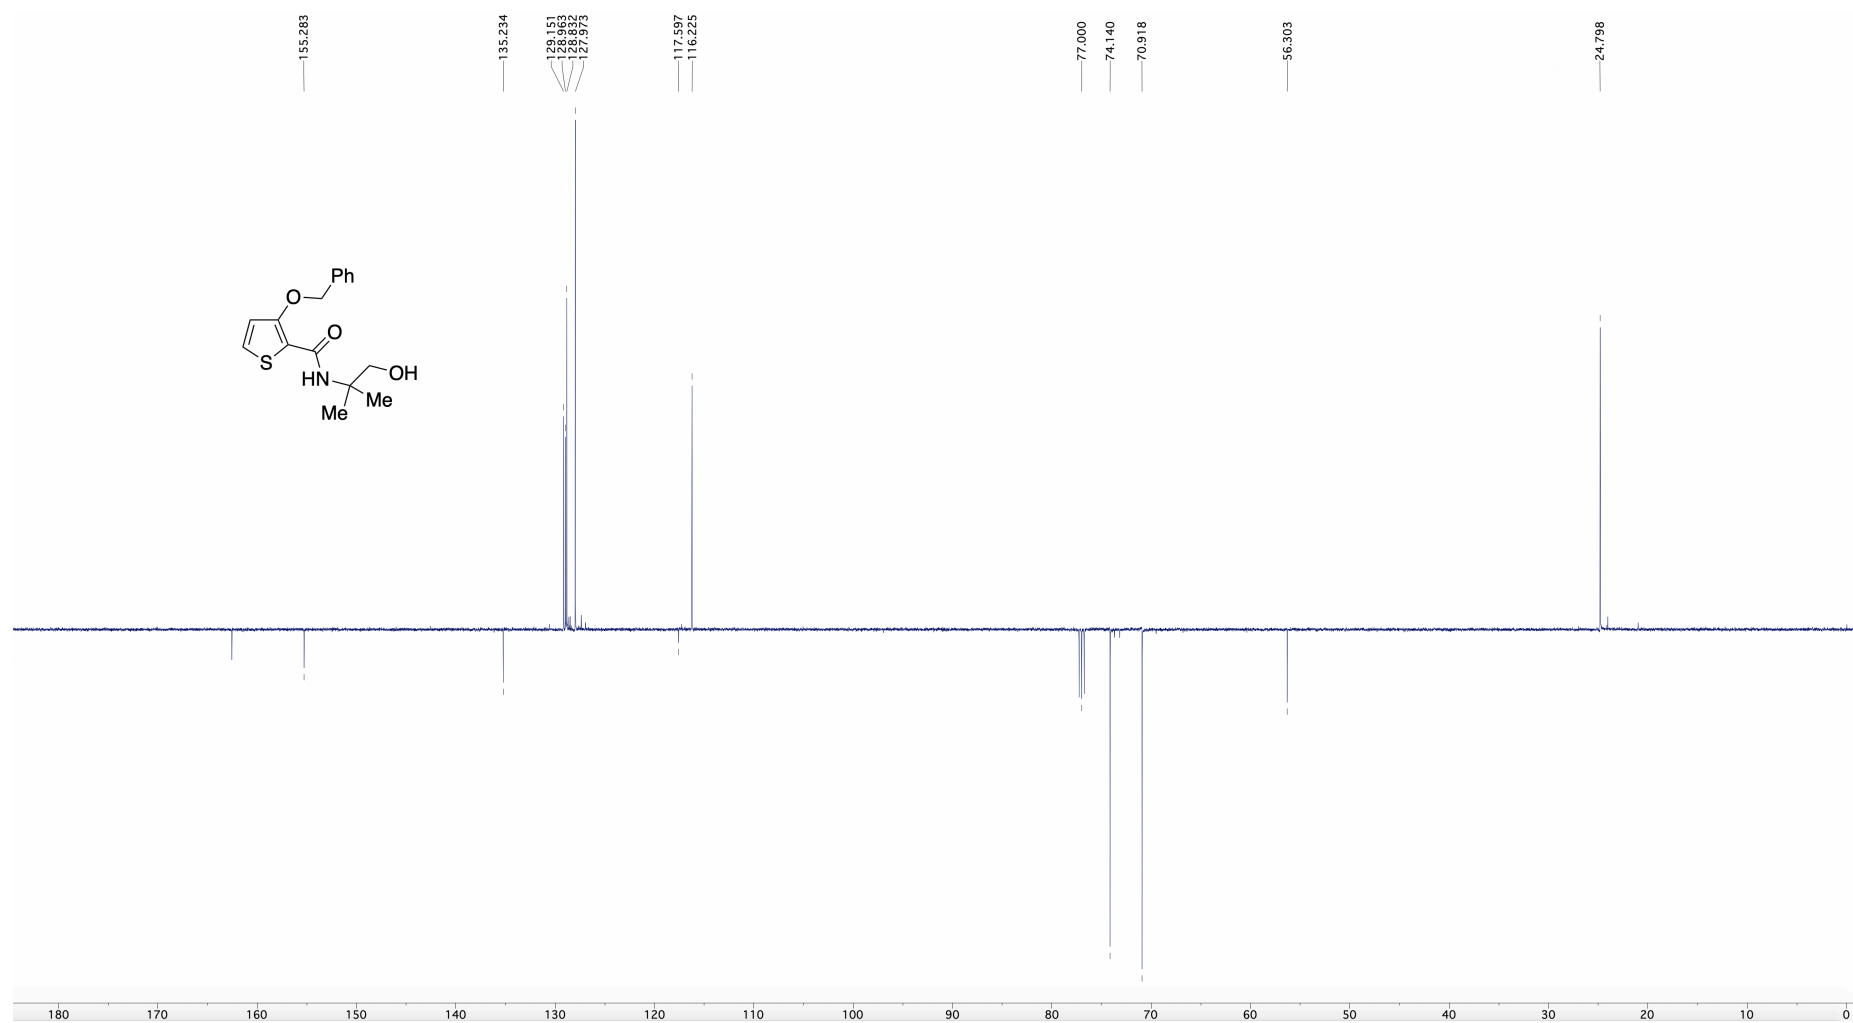

Figure S5. 500 MHz  $^1\text{H}$  NMR spectrum of **9**

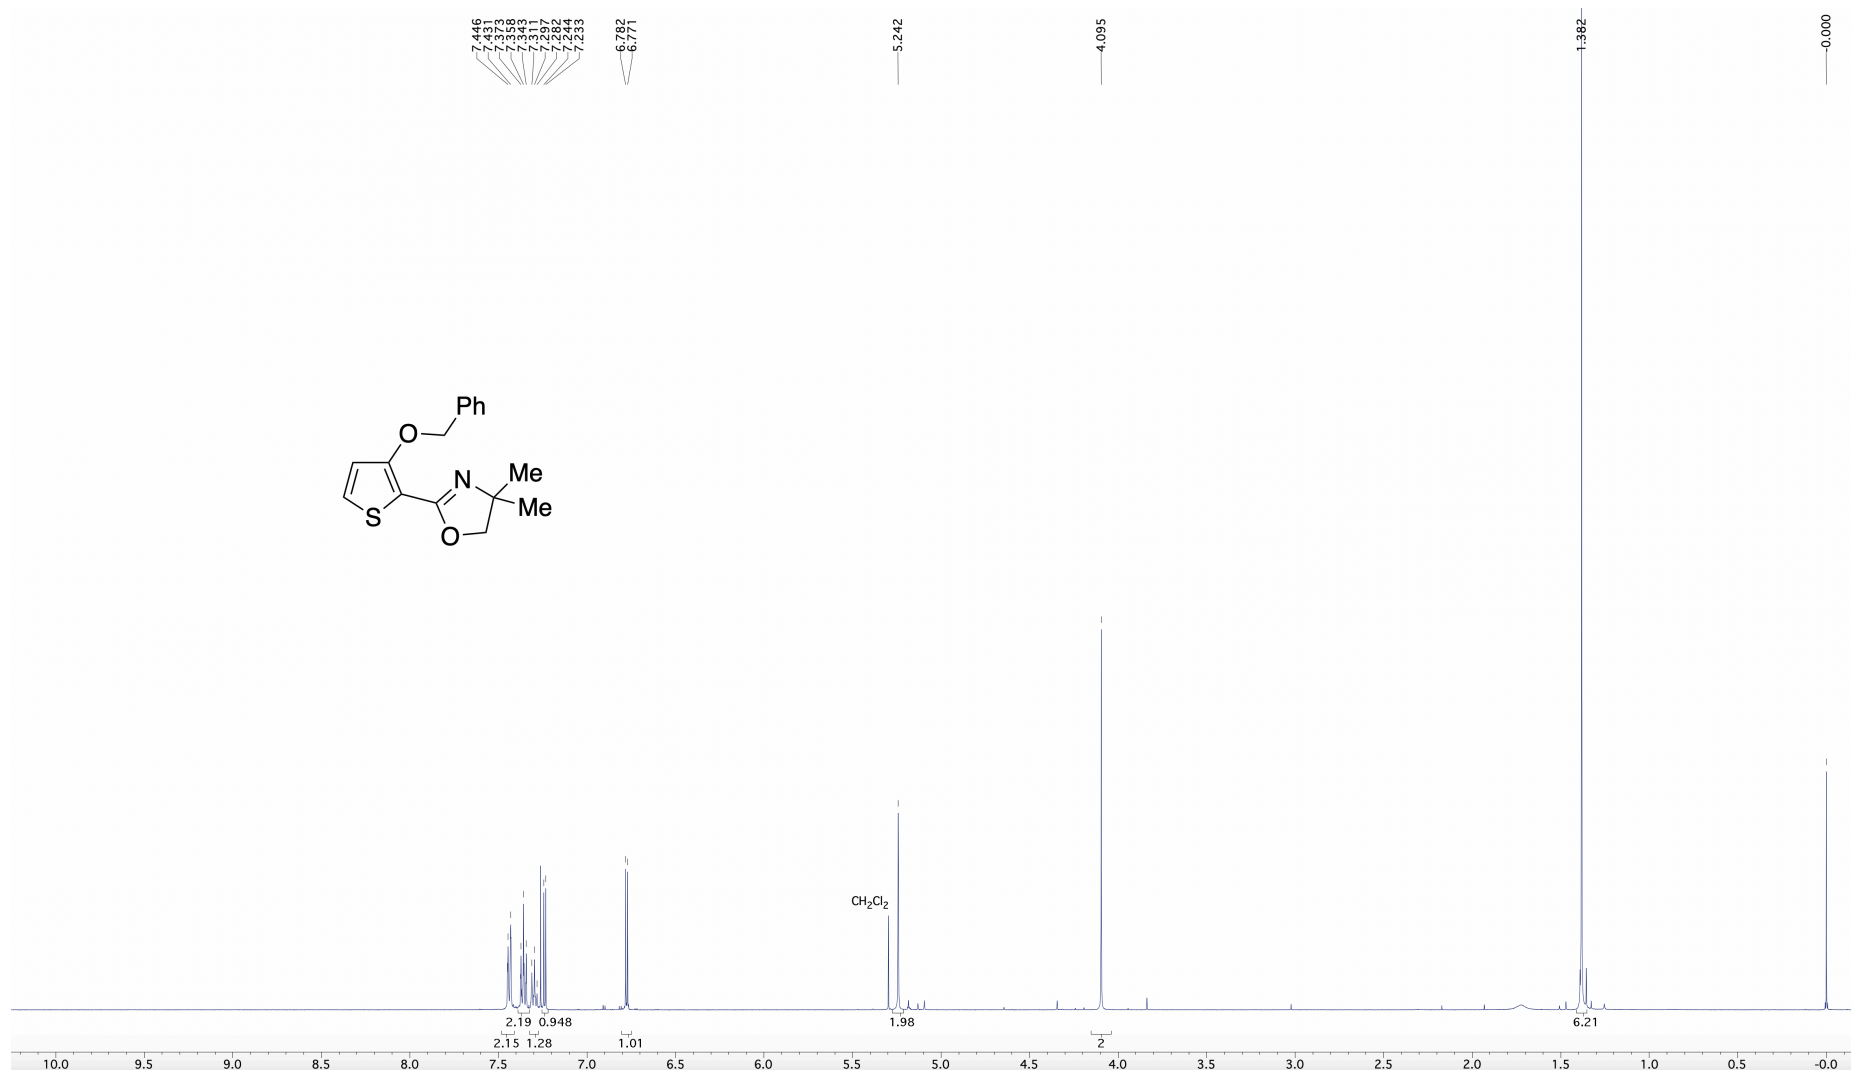

Figure S6. 125 MHz DEPTQ  $^{13}\text{C}$  NMR spectrum of **9**

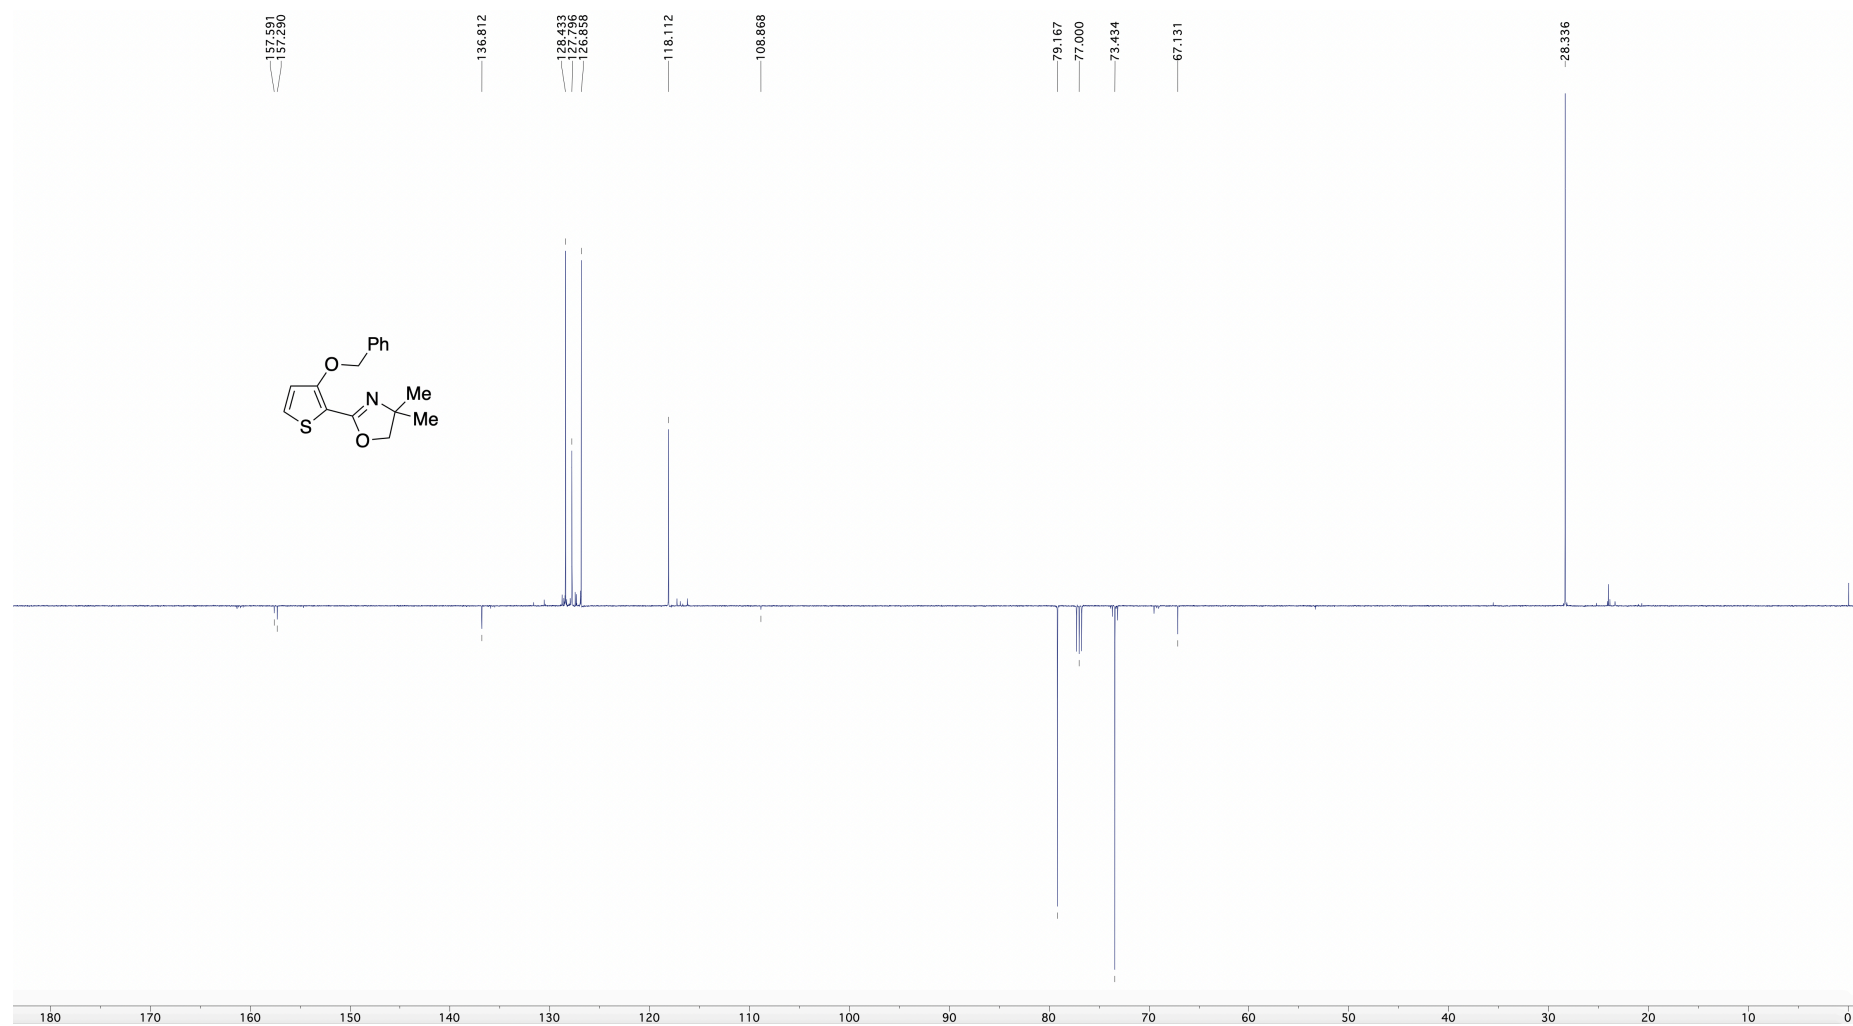

Figure S7. 125 MHz DEPTQ  $^{13}\text{C}$  NMR spectrum of **19**

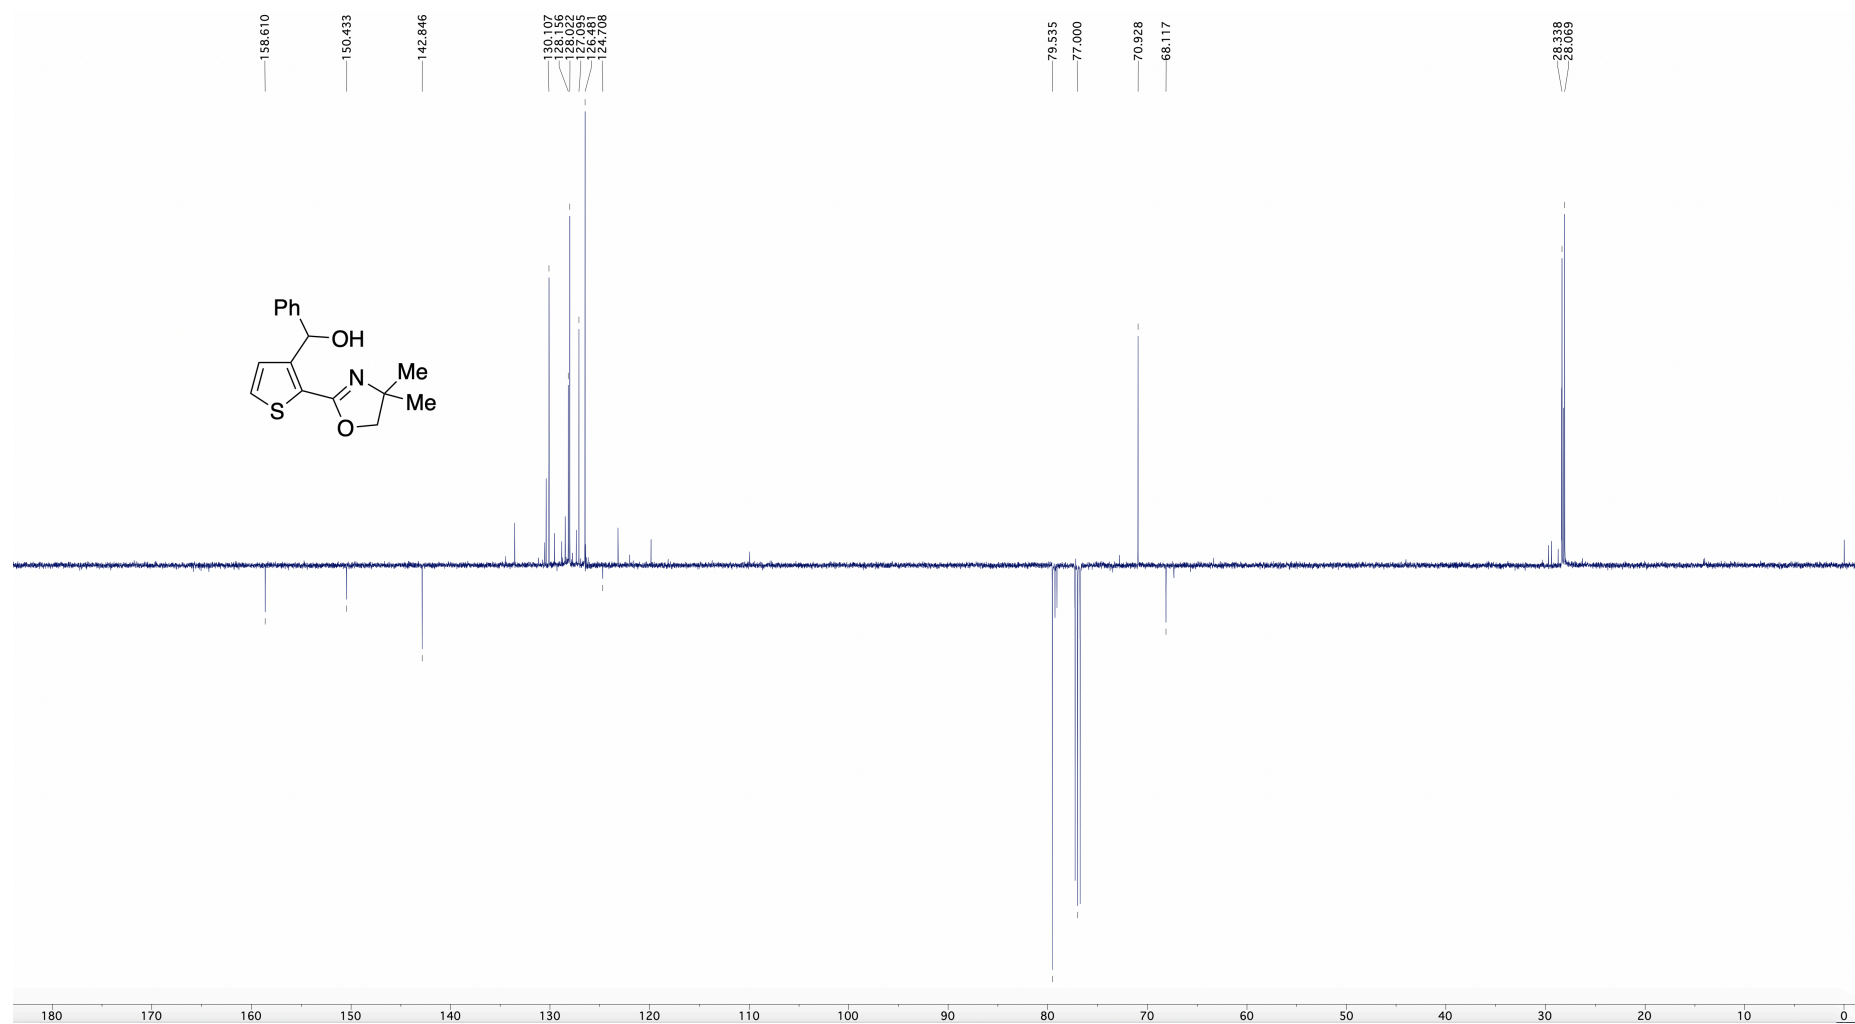

Figure S8. 400 MHz  $^1\text{H}$  NMR spectrum of **20**

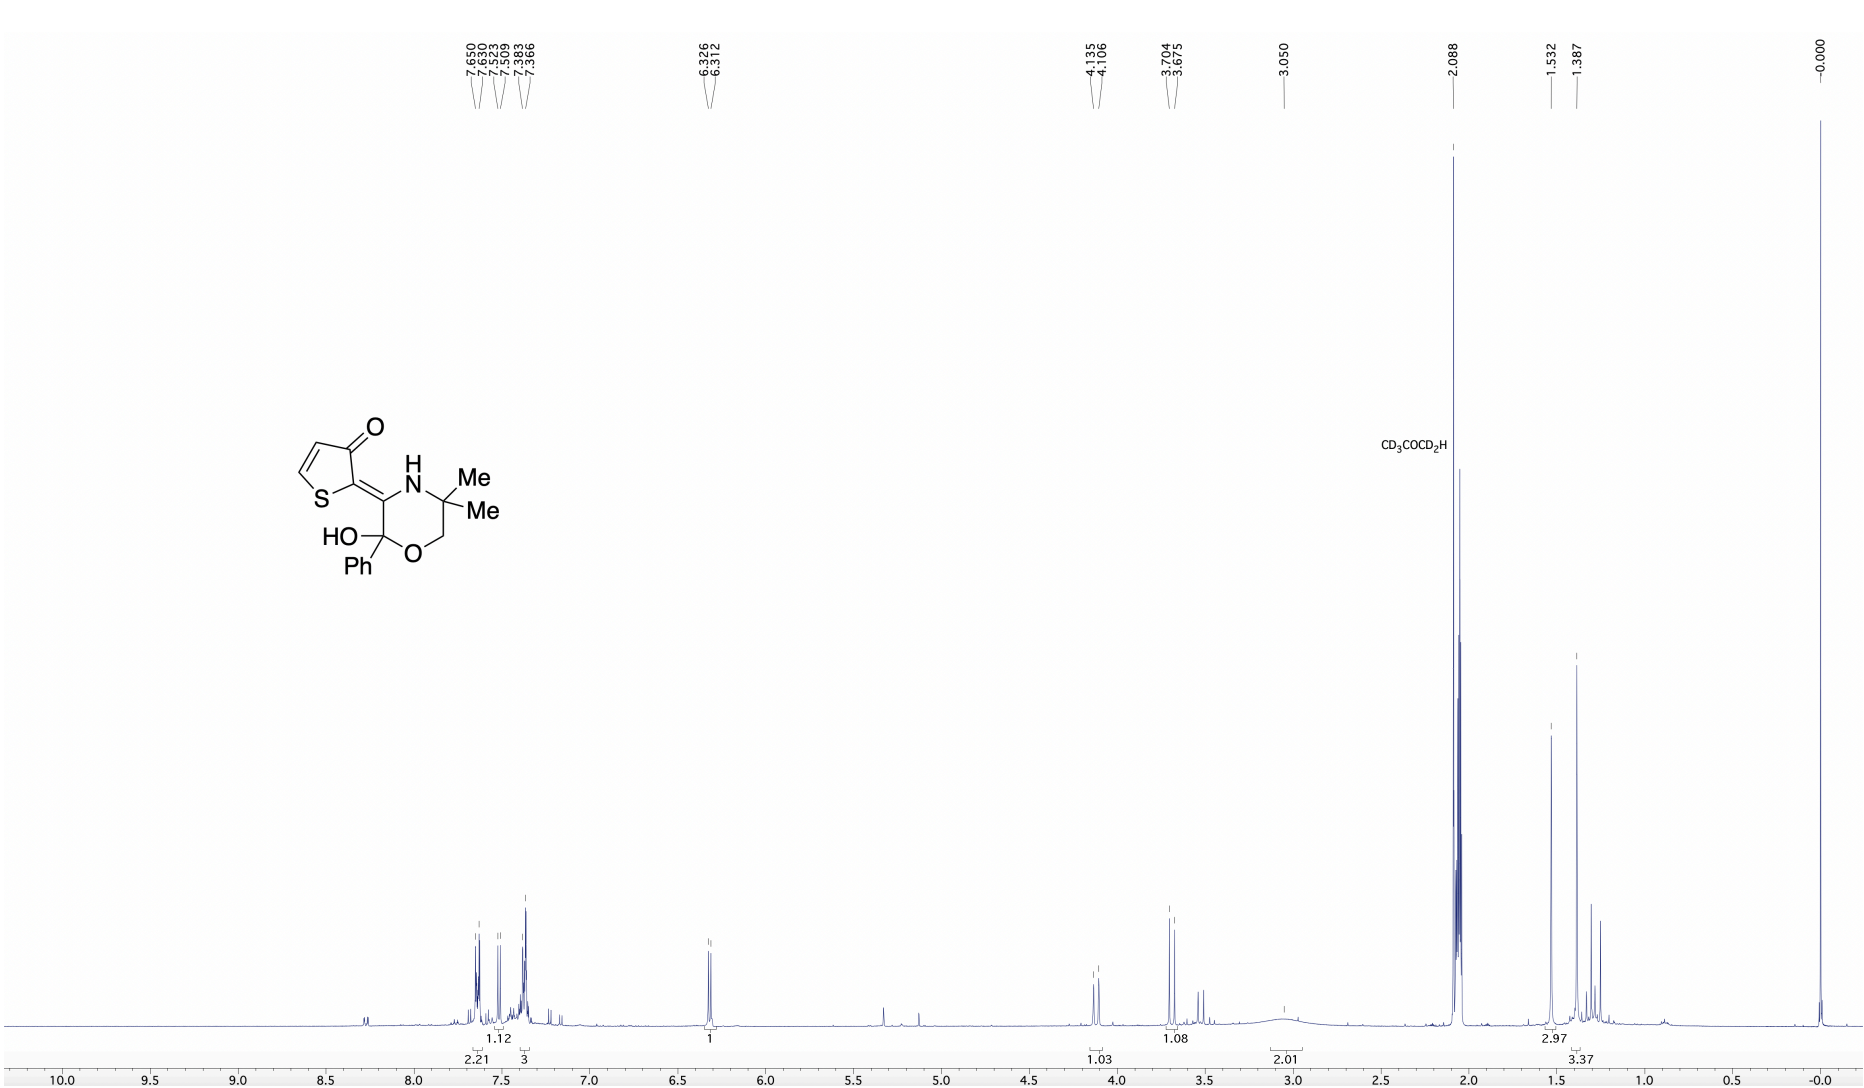

Figure S9. 125 MHz DEPTQ  $^{13}\text{C}$  NMR spectrum of **20**

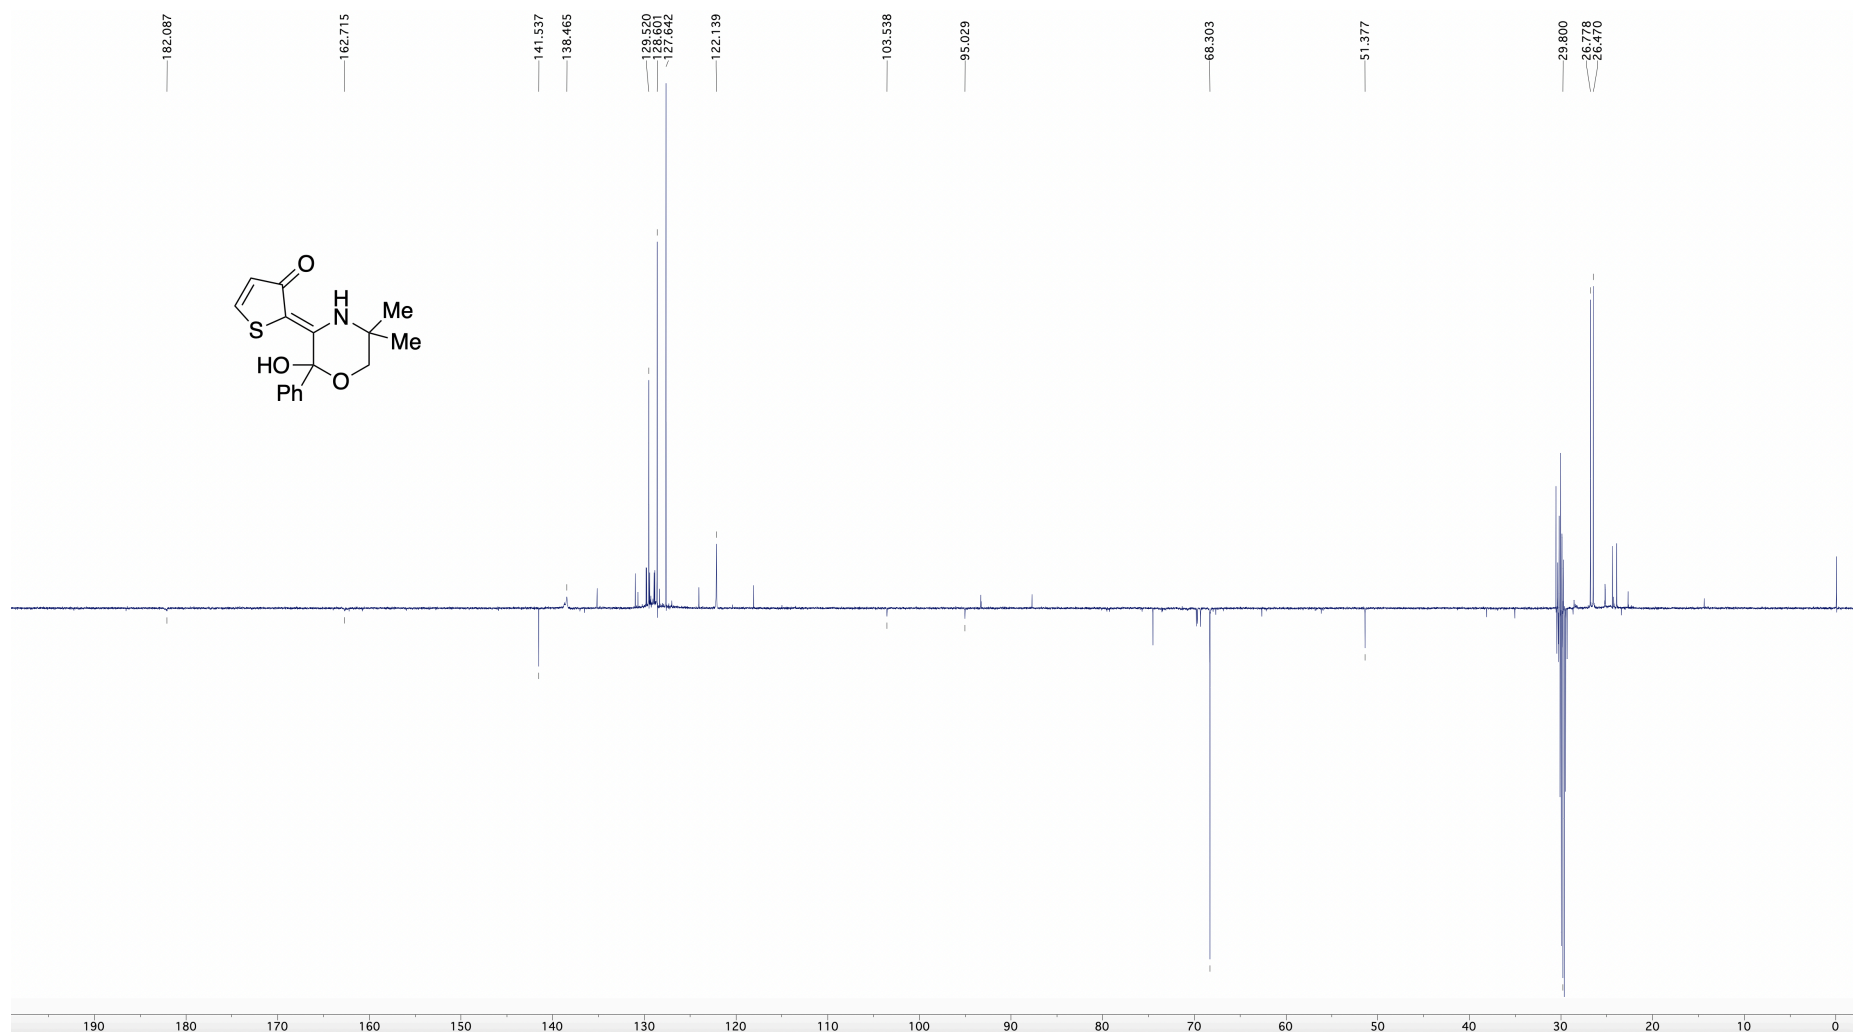

Figure S10. 500 MHz  $^1\text{H}$  NMR spectrum of **10**

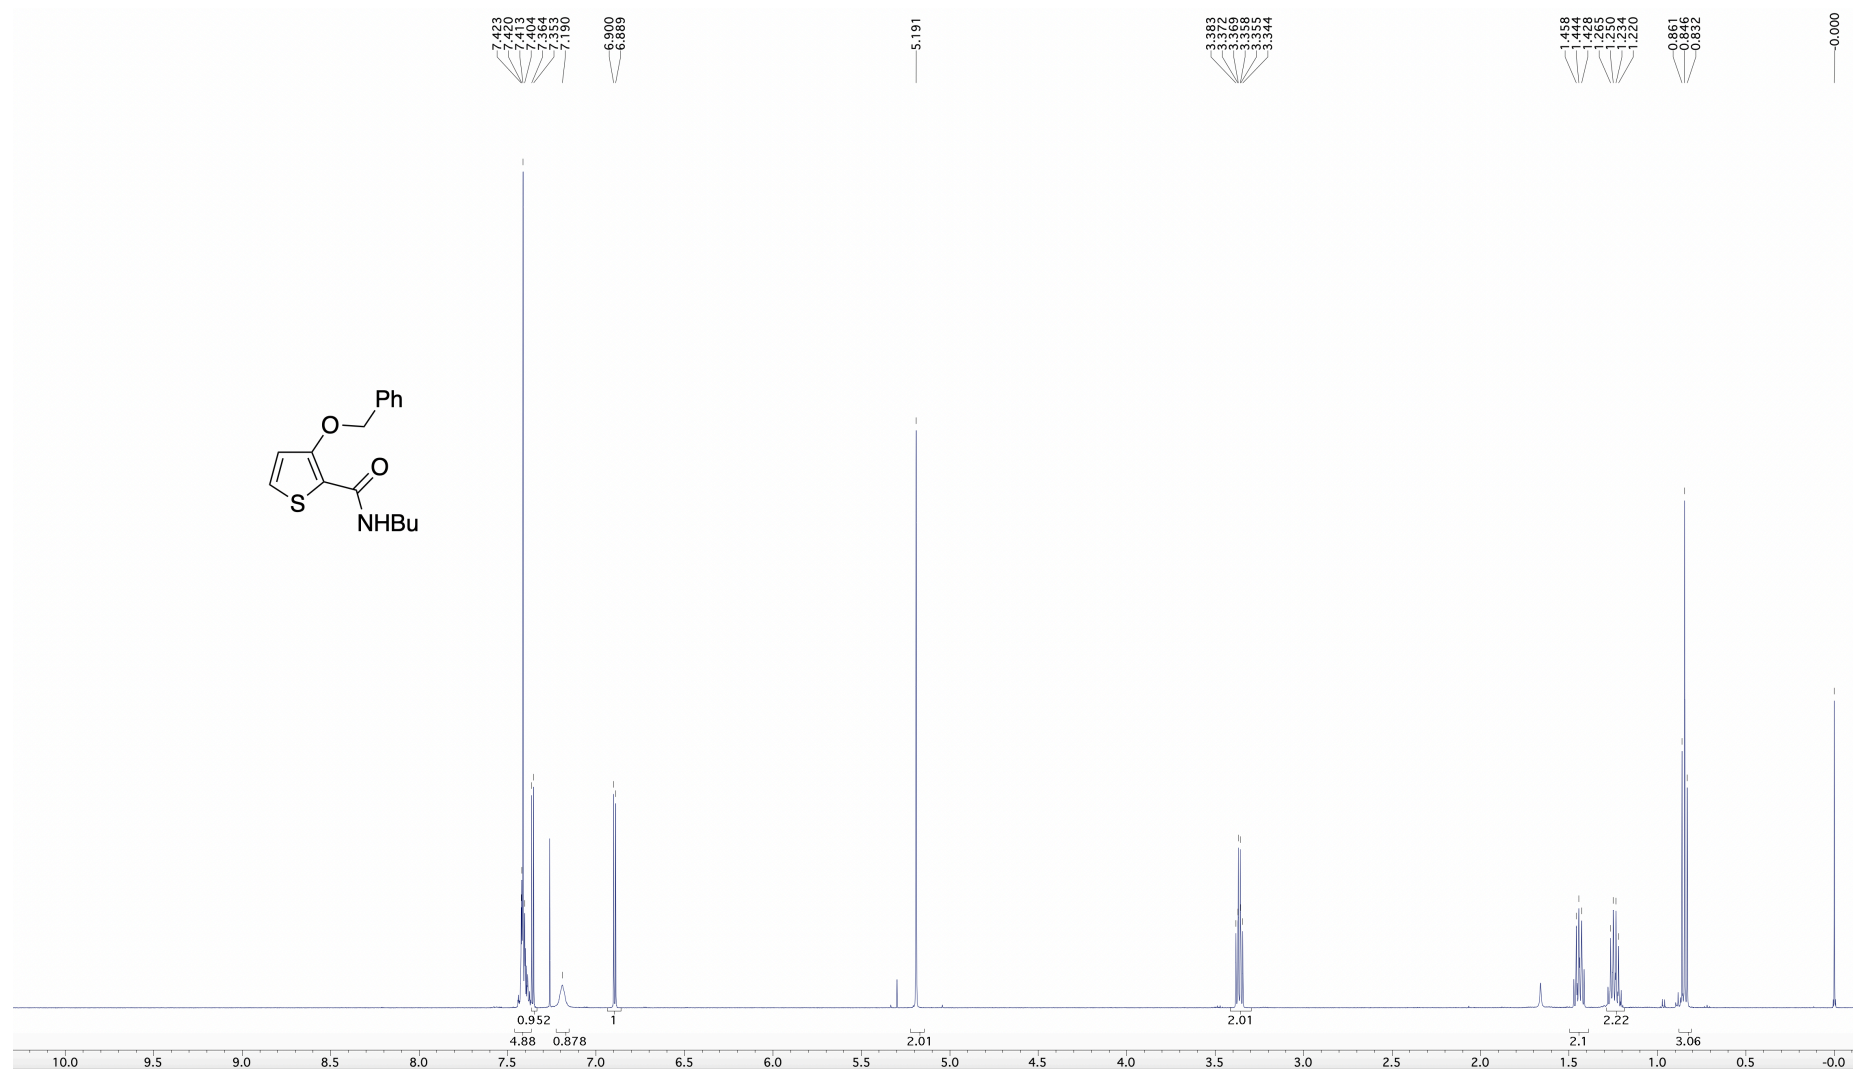

Figure S11. 125 MHz DEPTQ  $^{13}\text{C}$  NMR spectrum of **10**

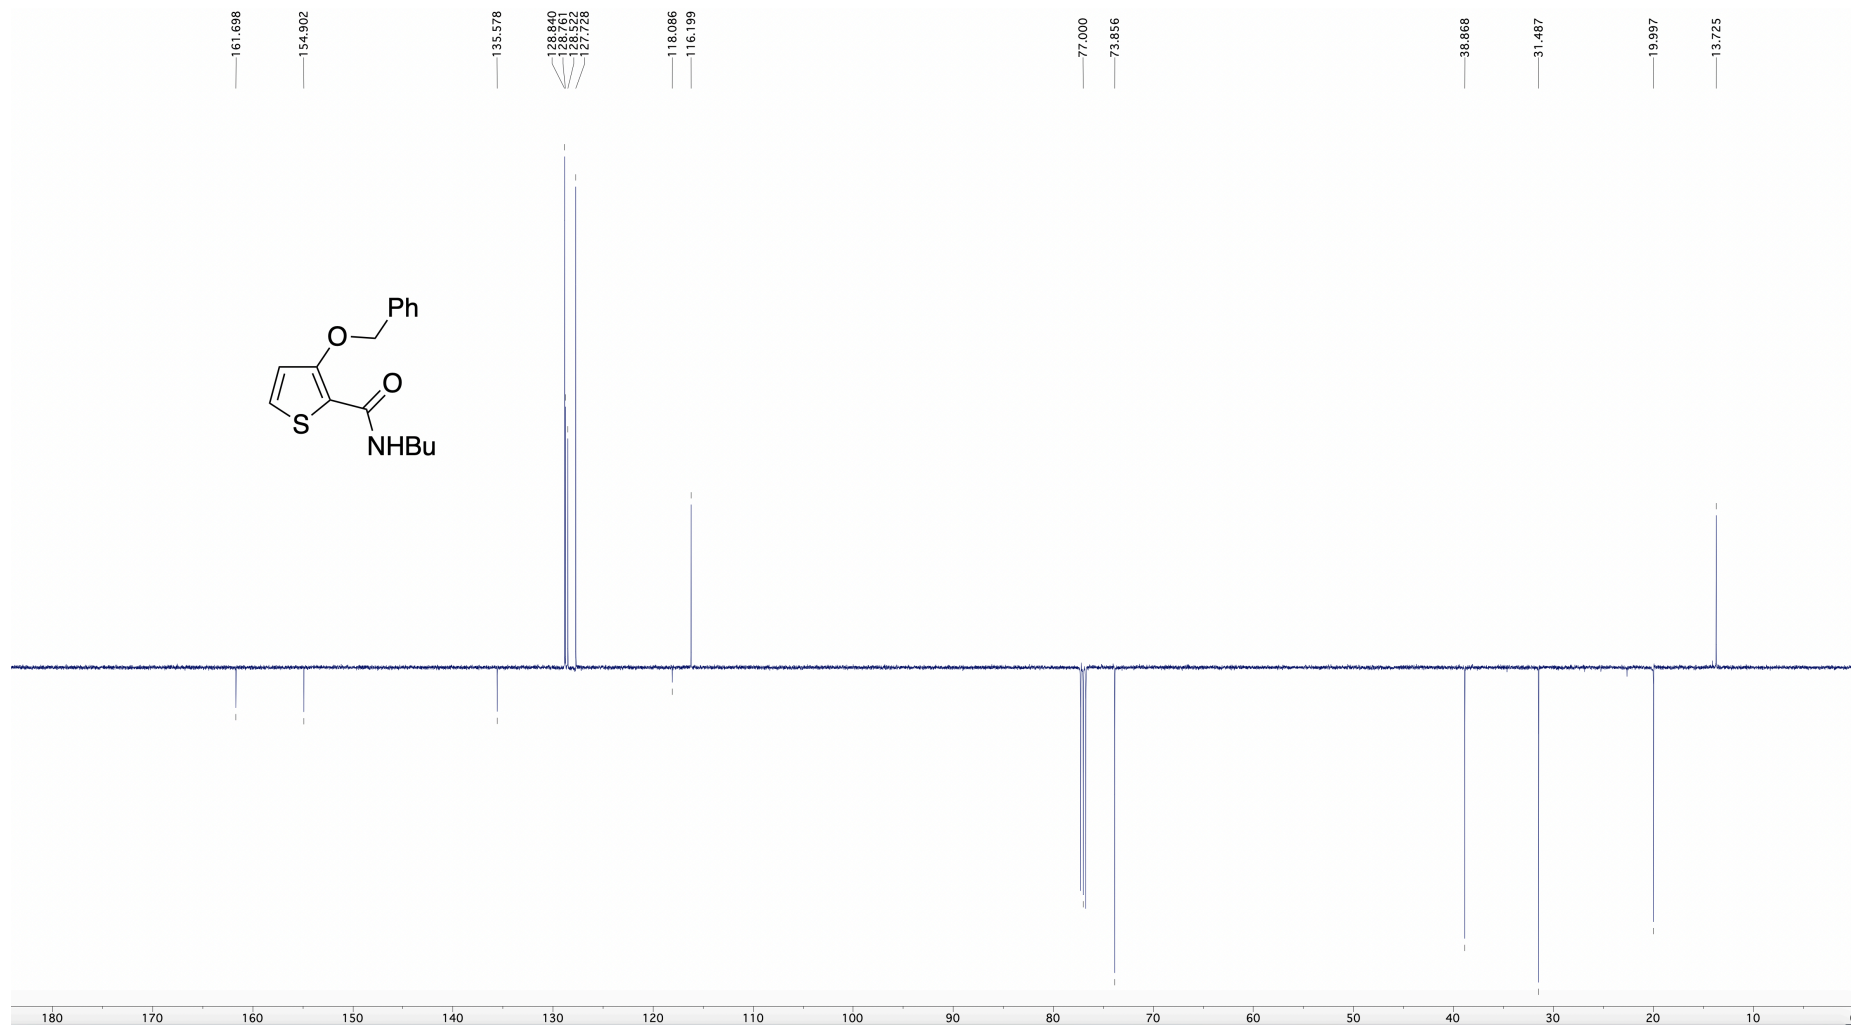

Figure S12. 400 MHz  $^1\text{H}$  NMR spectrum of **25**

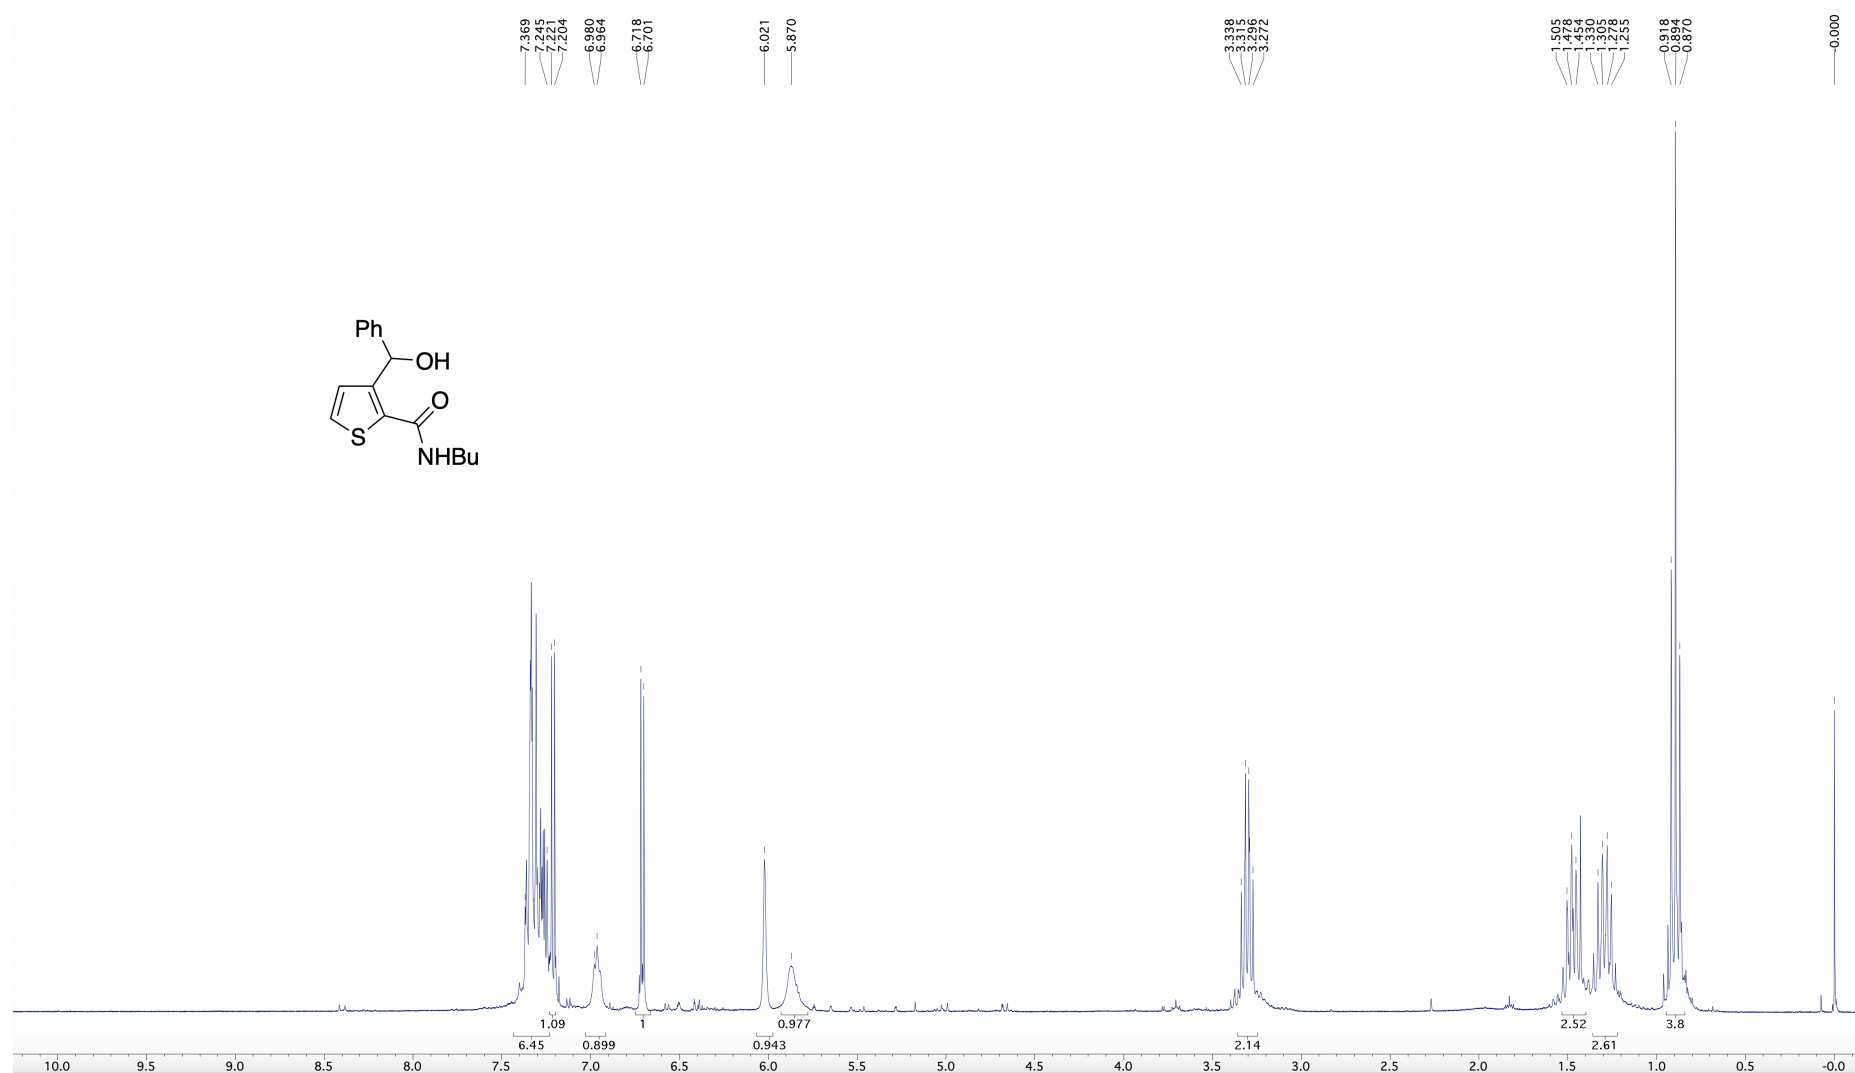

Figure S13. 75 MHz DEPTQ  $^{13}\text{C}$  NMR spectrum of **25**

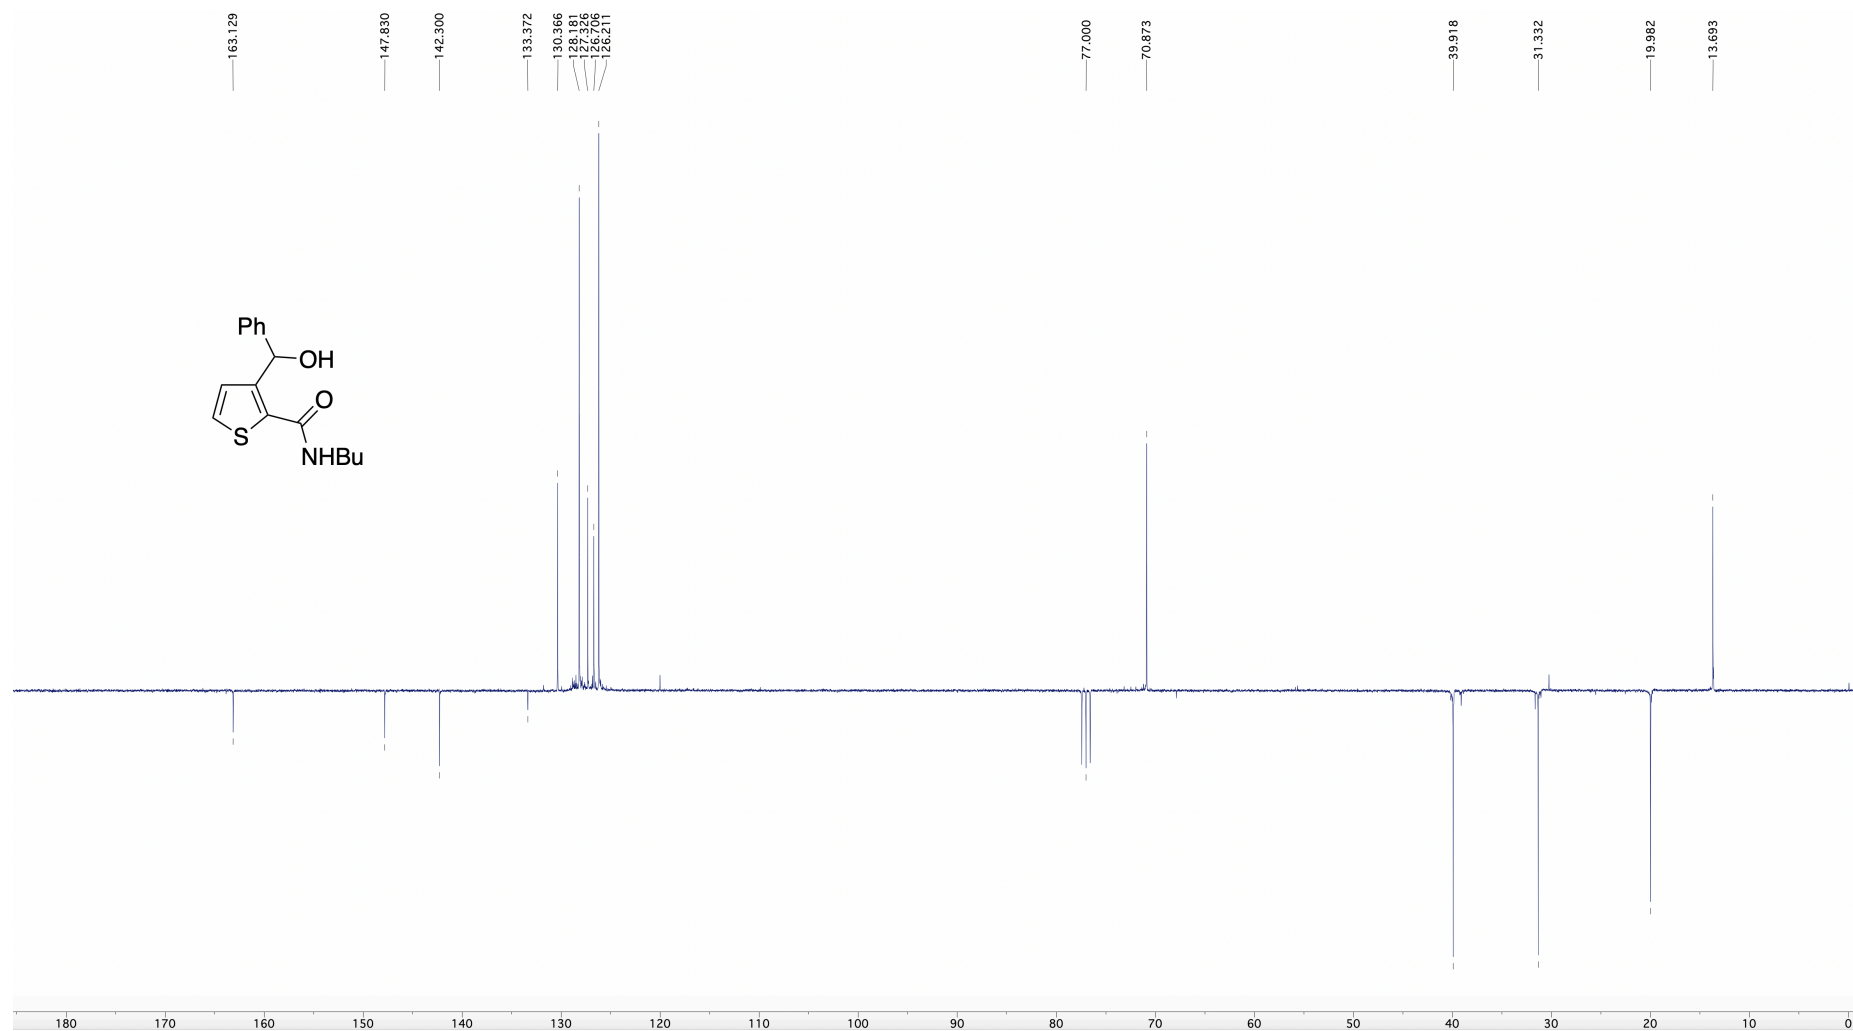

Figure S14. 400 MHz  $^1\text{H}$  NMR spectrum of **26**

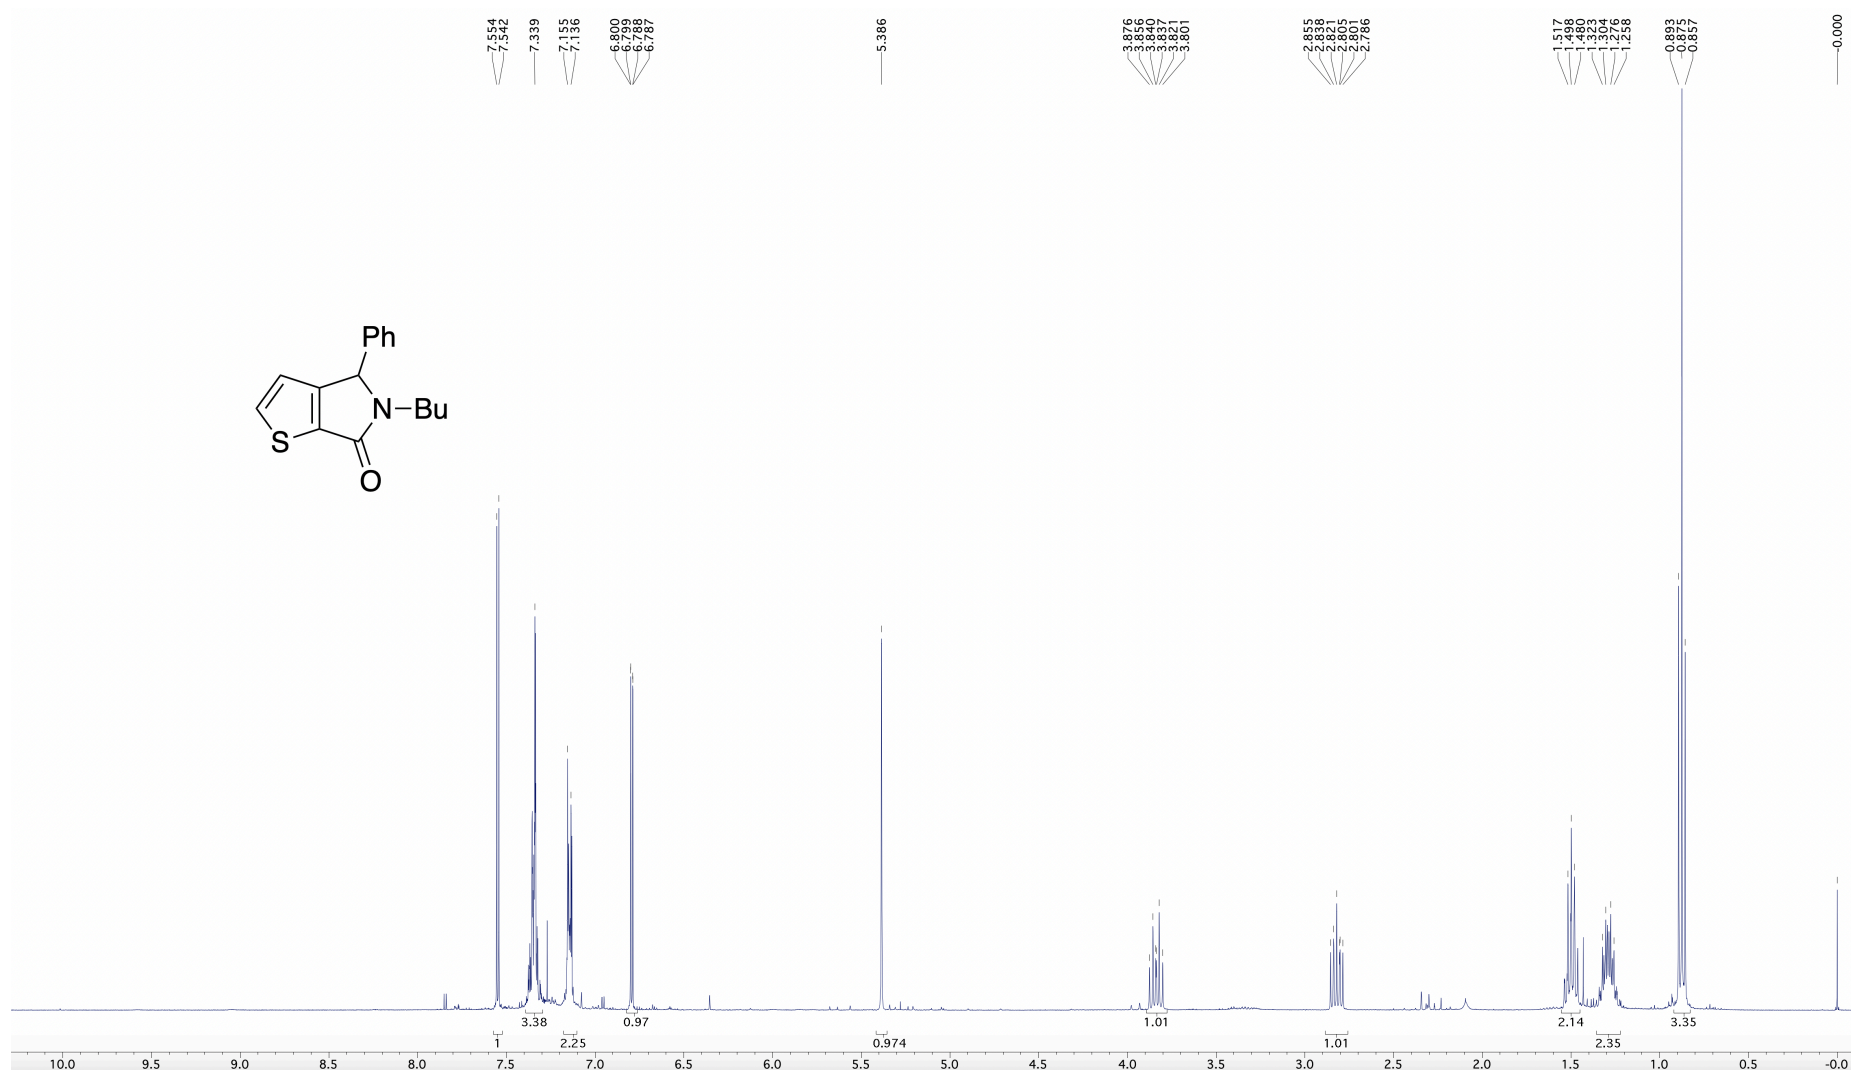

Figure S15. 125 MHz DEPTQ  $^{13}\text{C}$  NMR spectrum of **26**

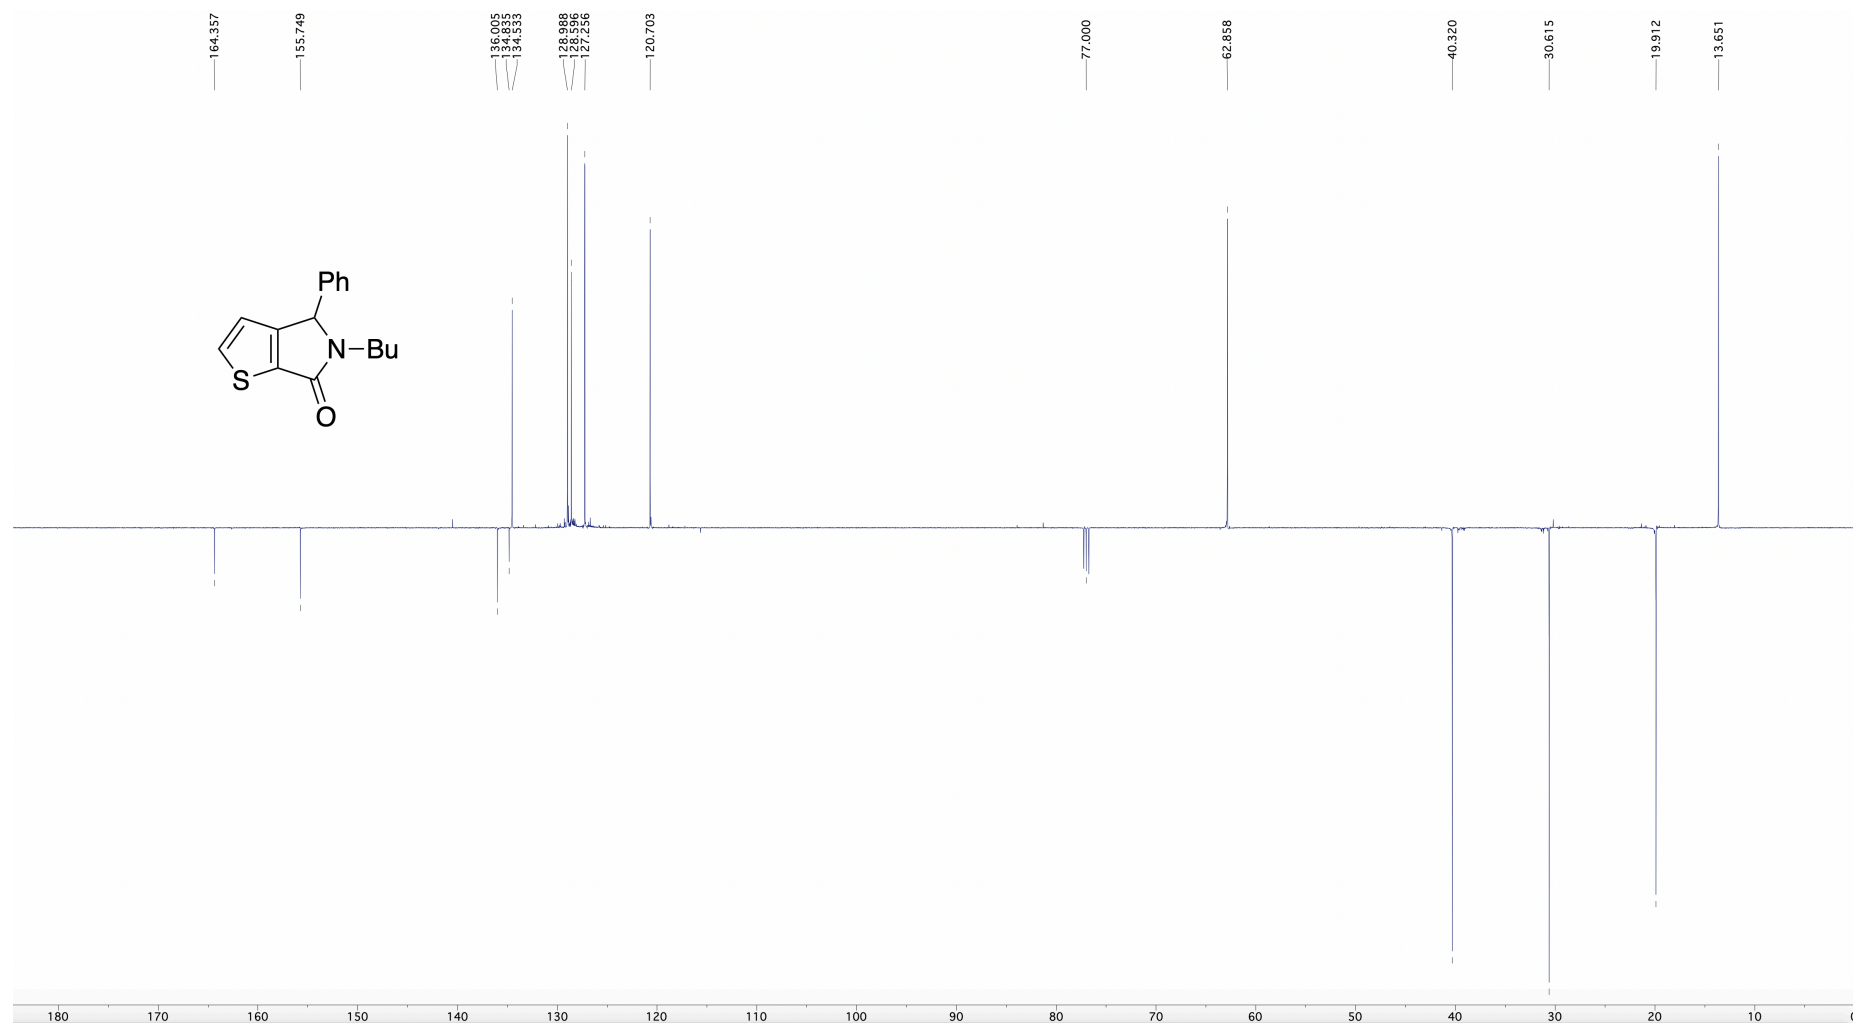

Figure S16. 500 MHz  $^1\text{H}$  NMR spectrum of **30**

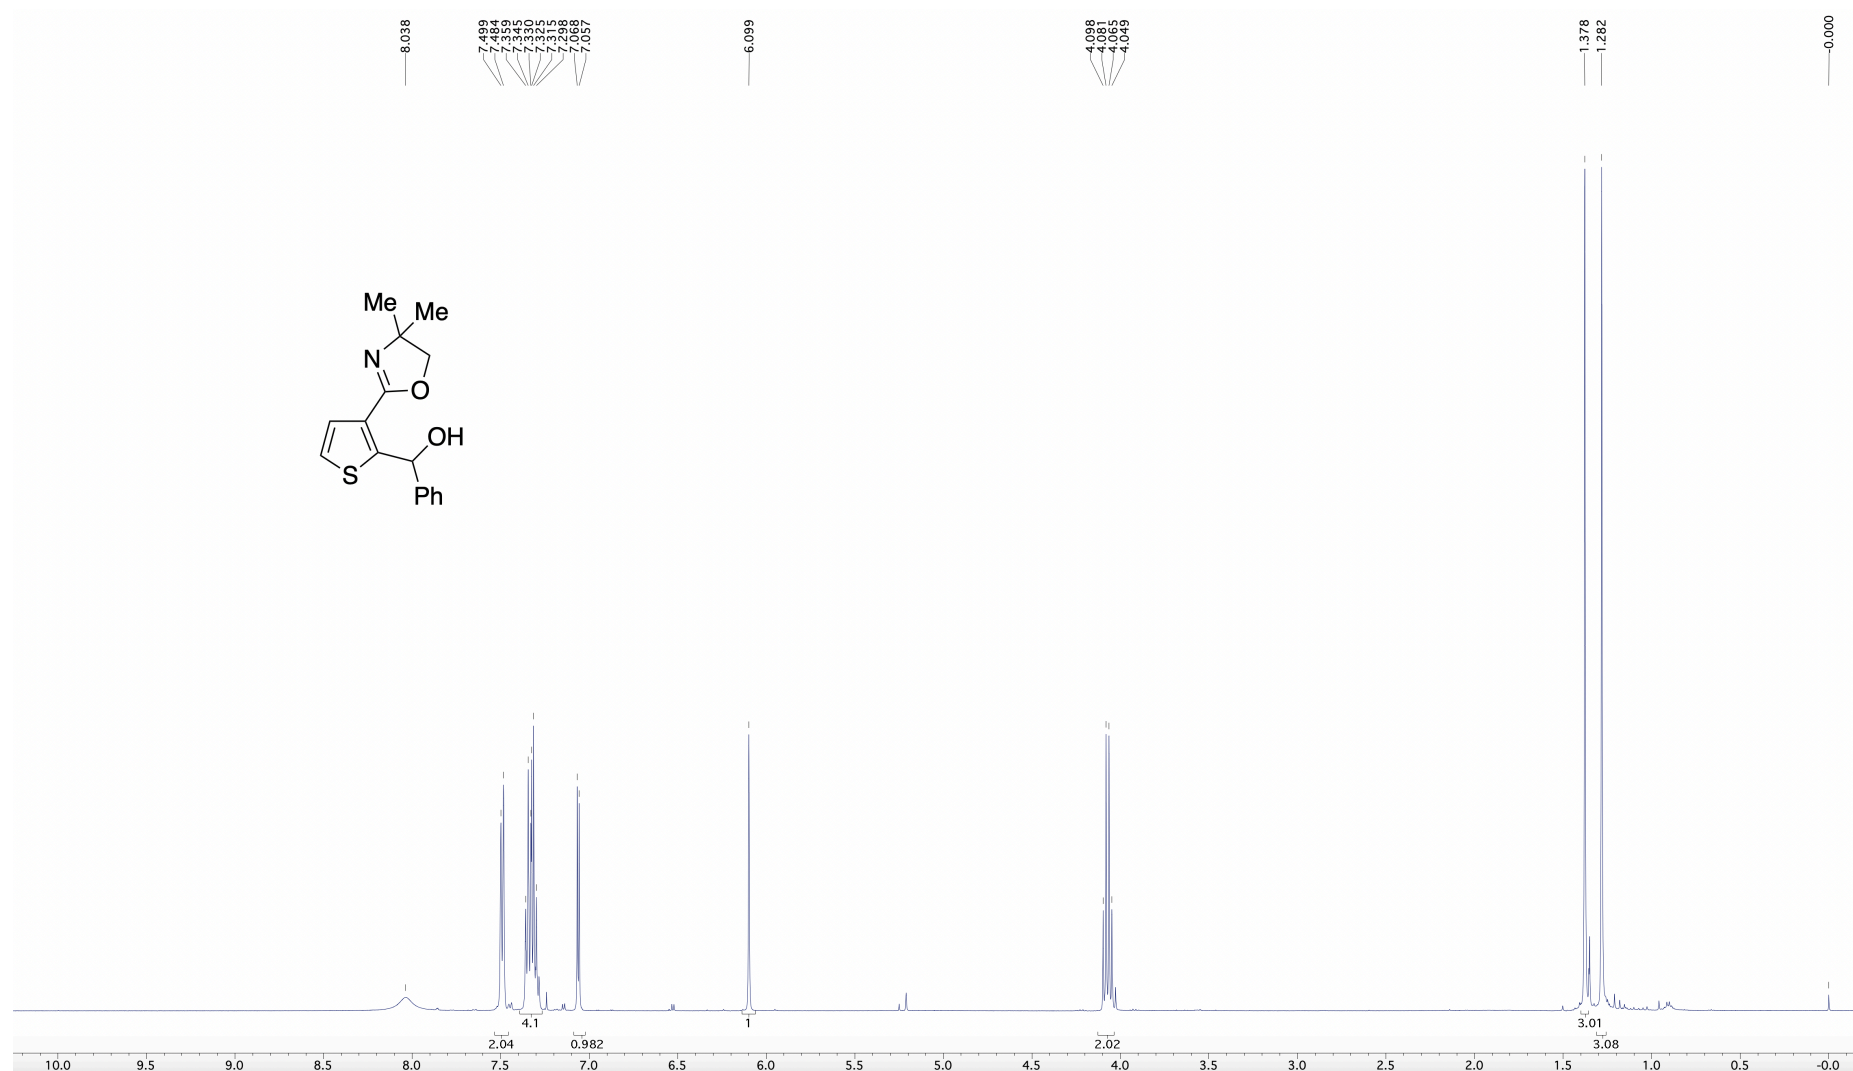

Figure S17. 125 MHz DEPTQ  $^{13}\text{C}$  NMR spectrum of **30**

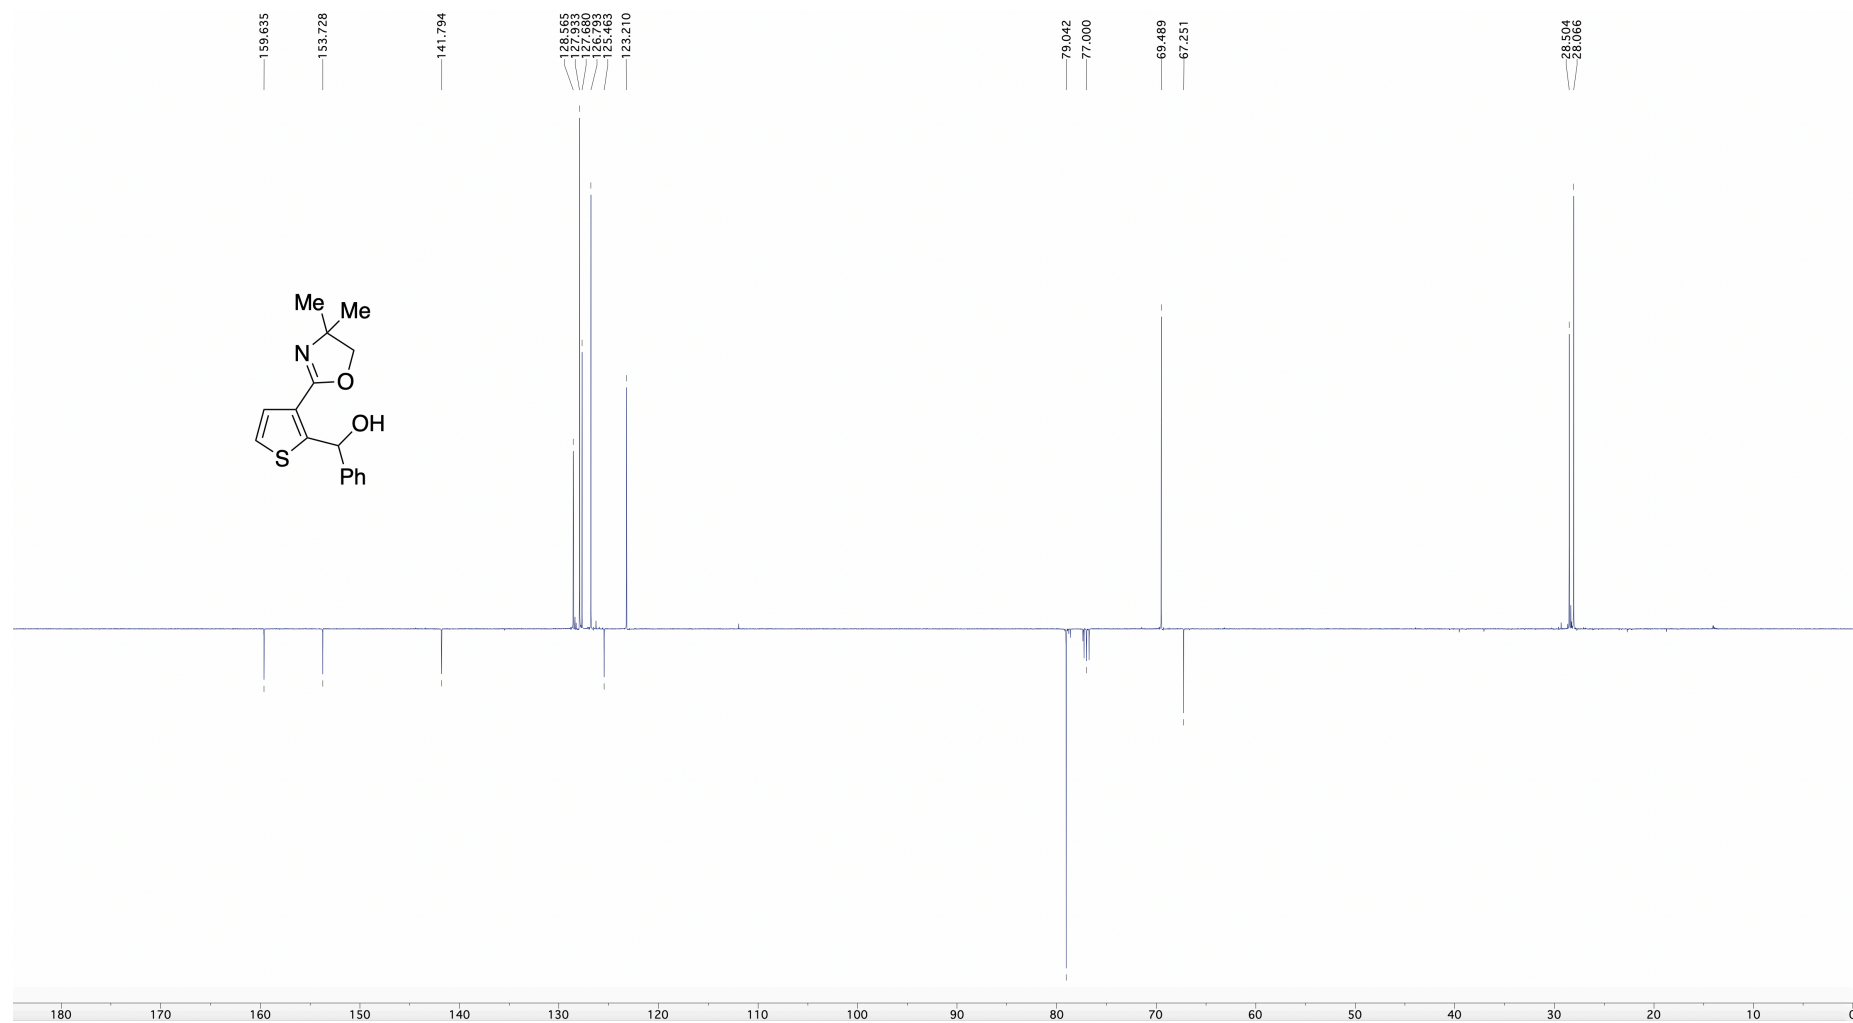

Figure S18. 500 MHz  $^1\text{H}$  NMR spectrum of **33**

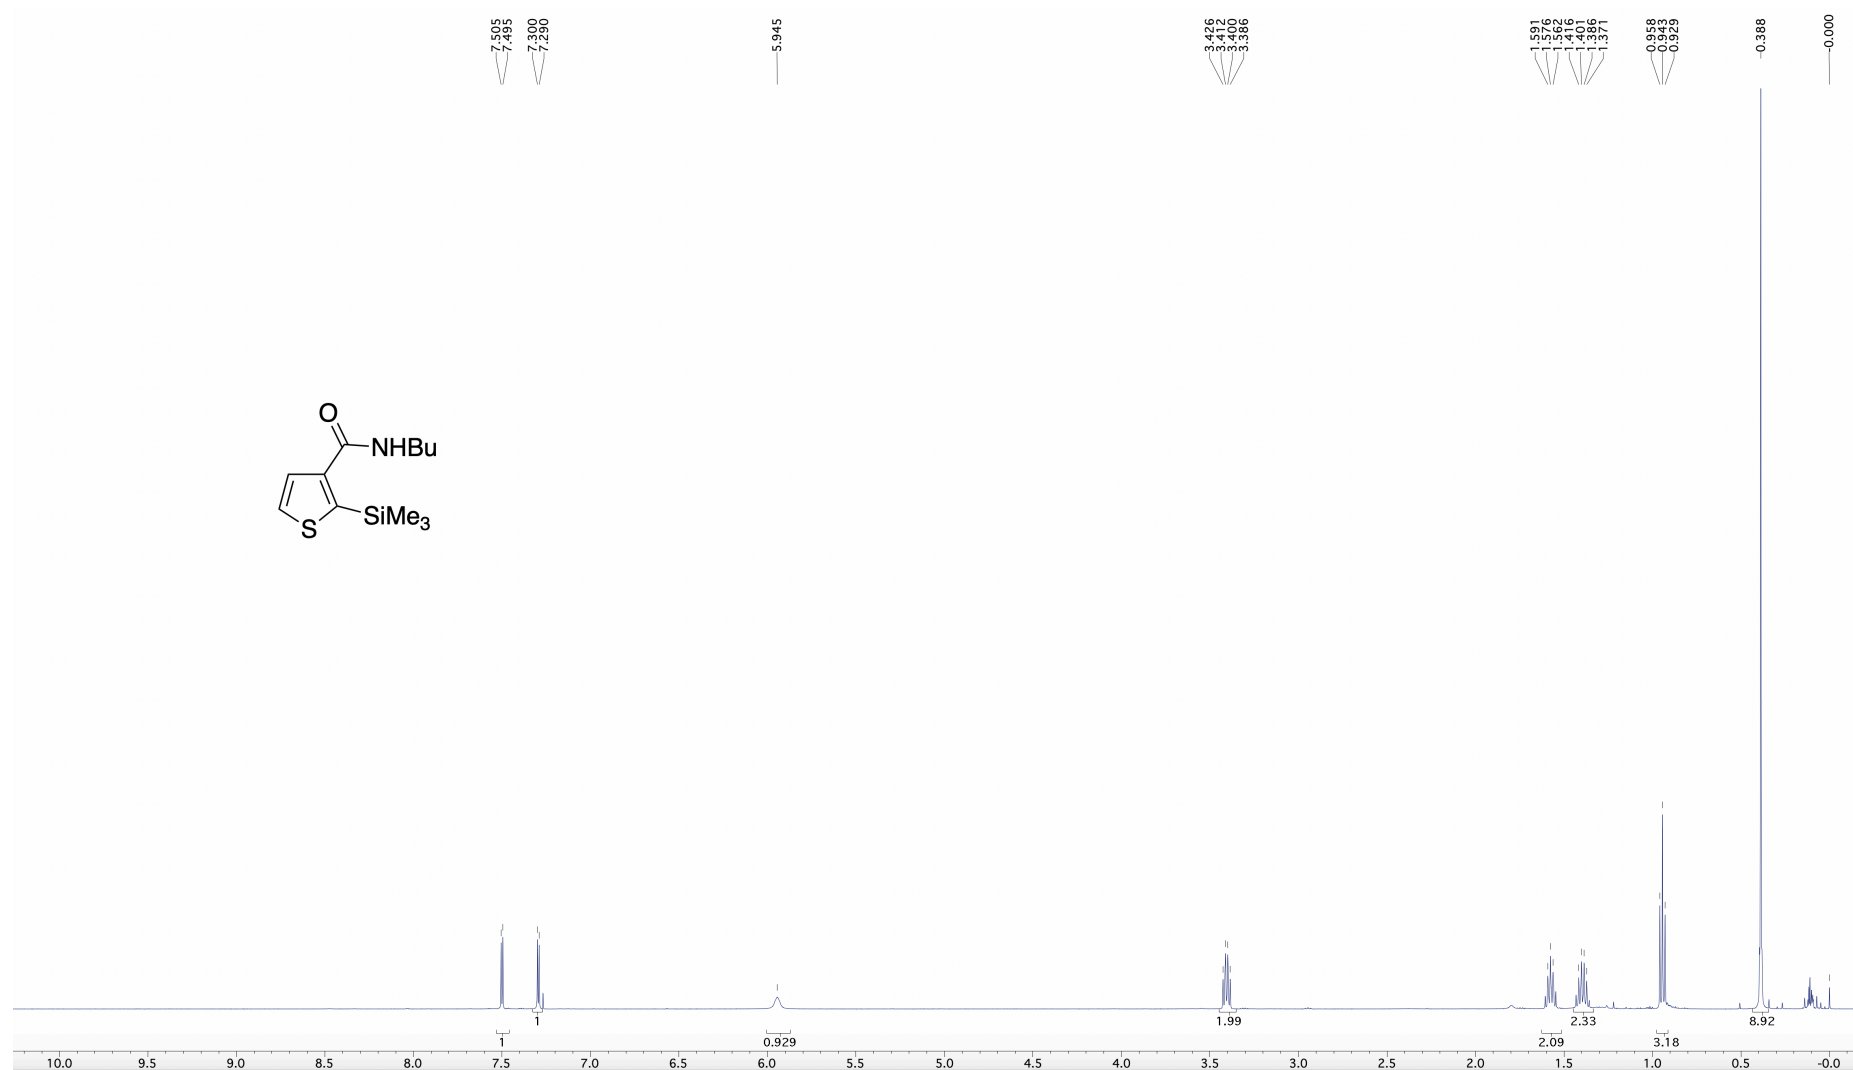

Figure S19. 125 MHz DEPTQ  $^{13}\text{C}$  NMR spectrum of **33**

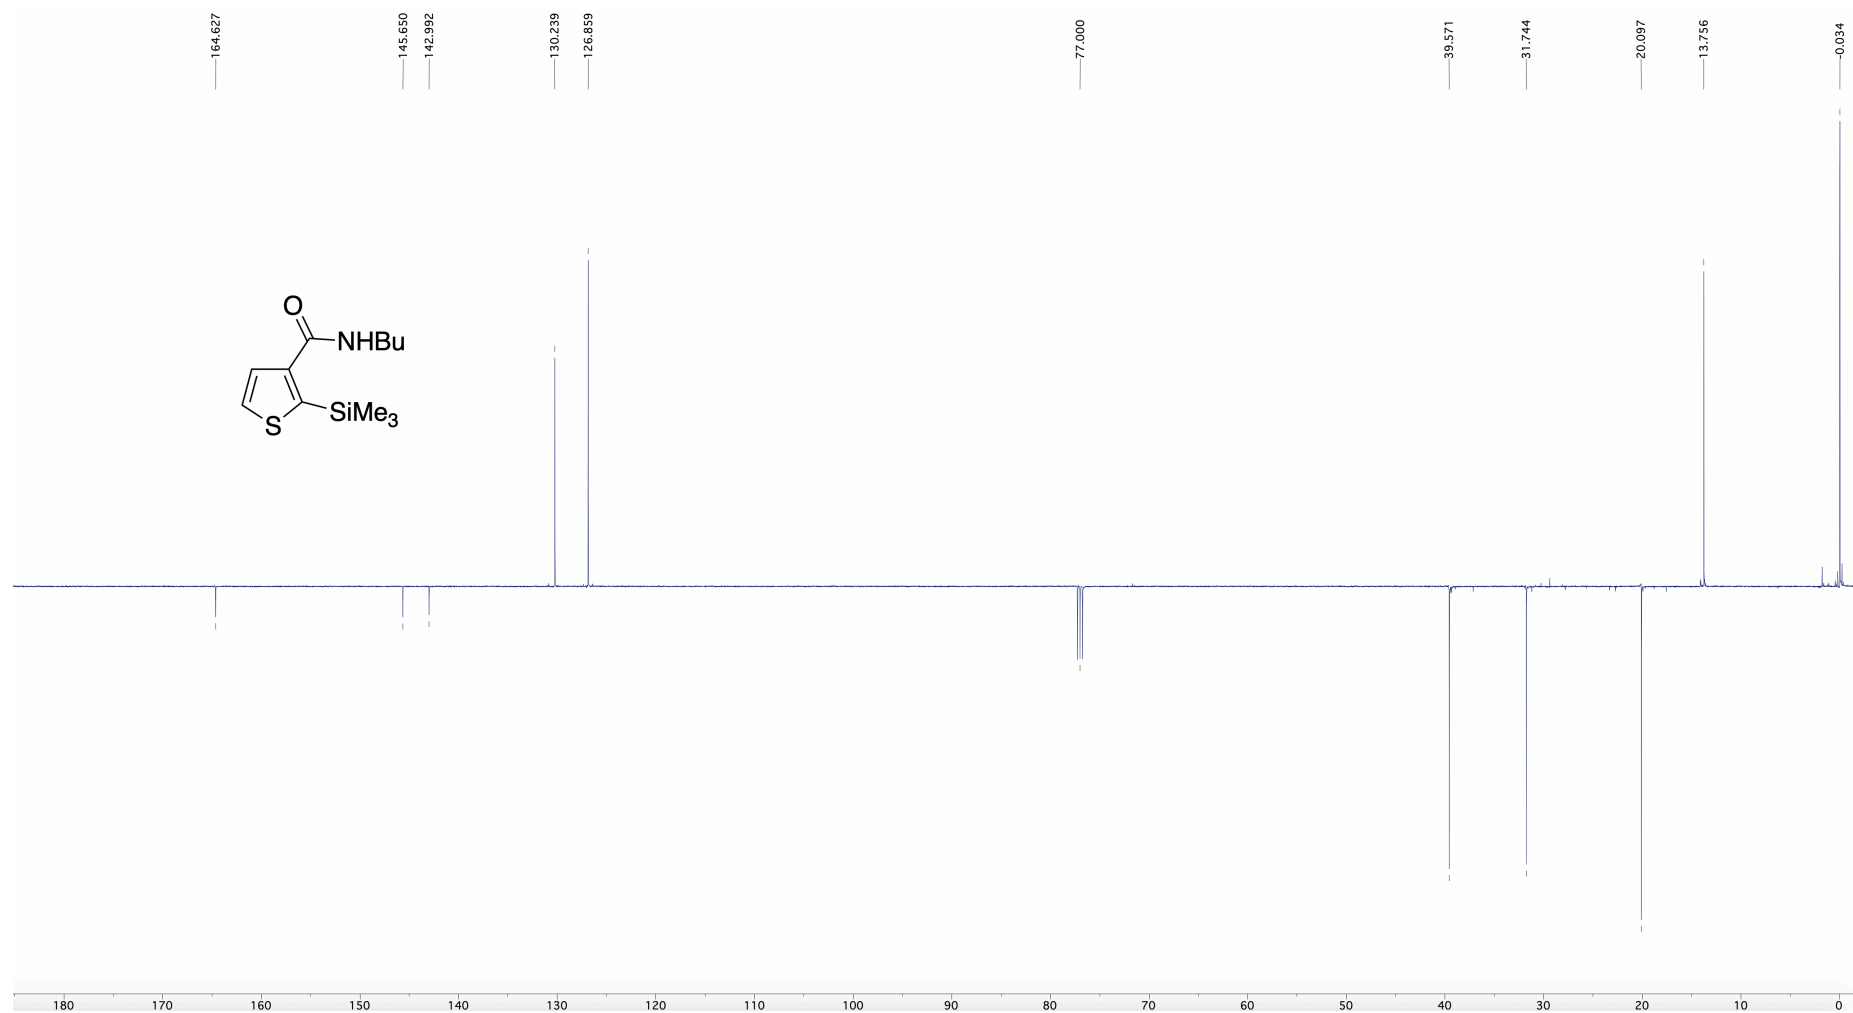

Figure S20. 400 MHz  $^1\text{H}$  NMR spectrum of **35**

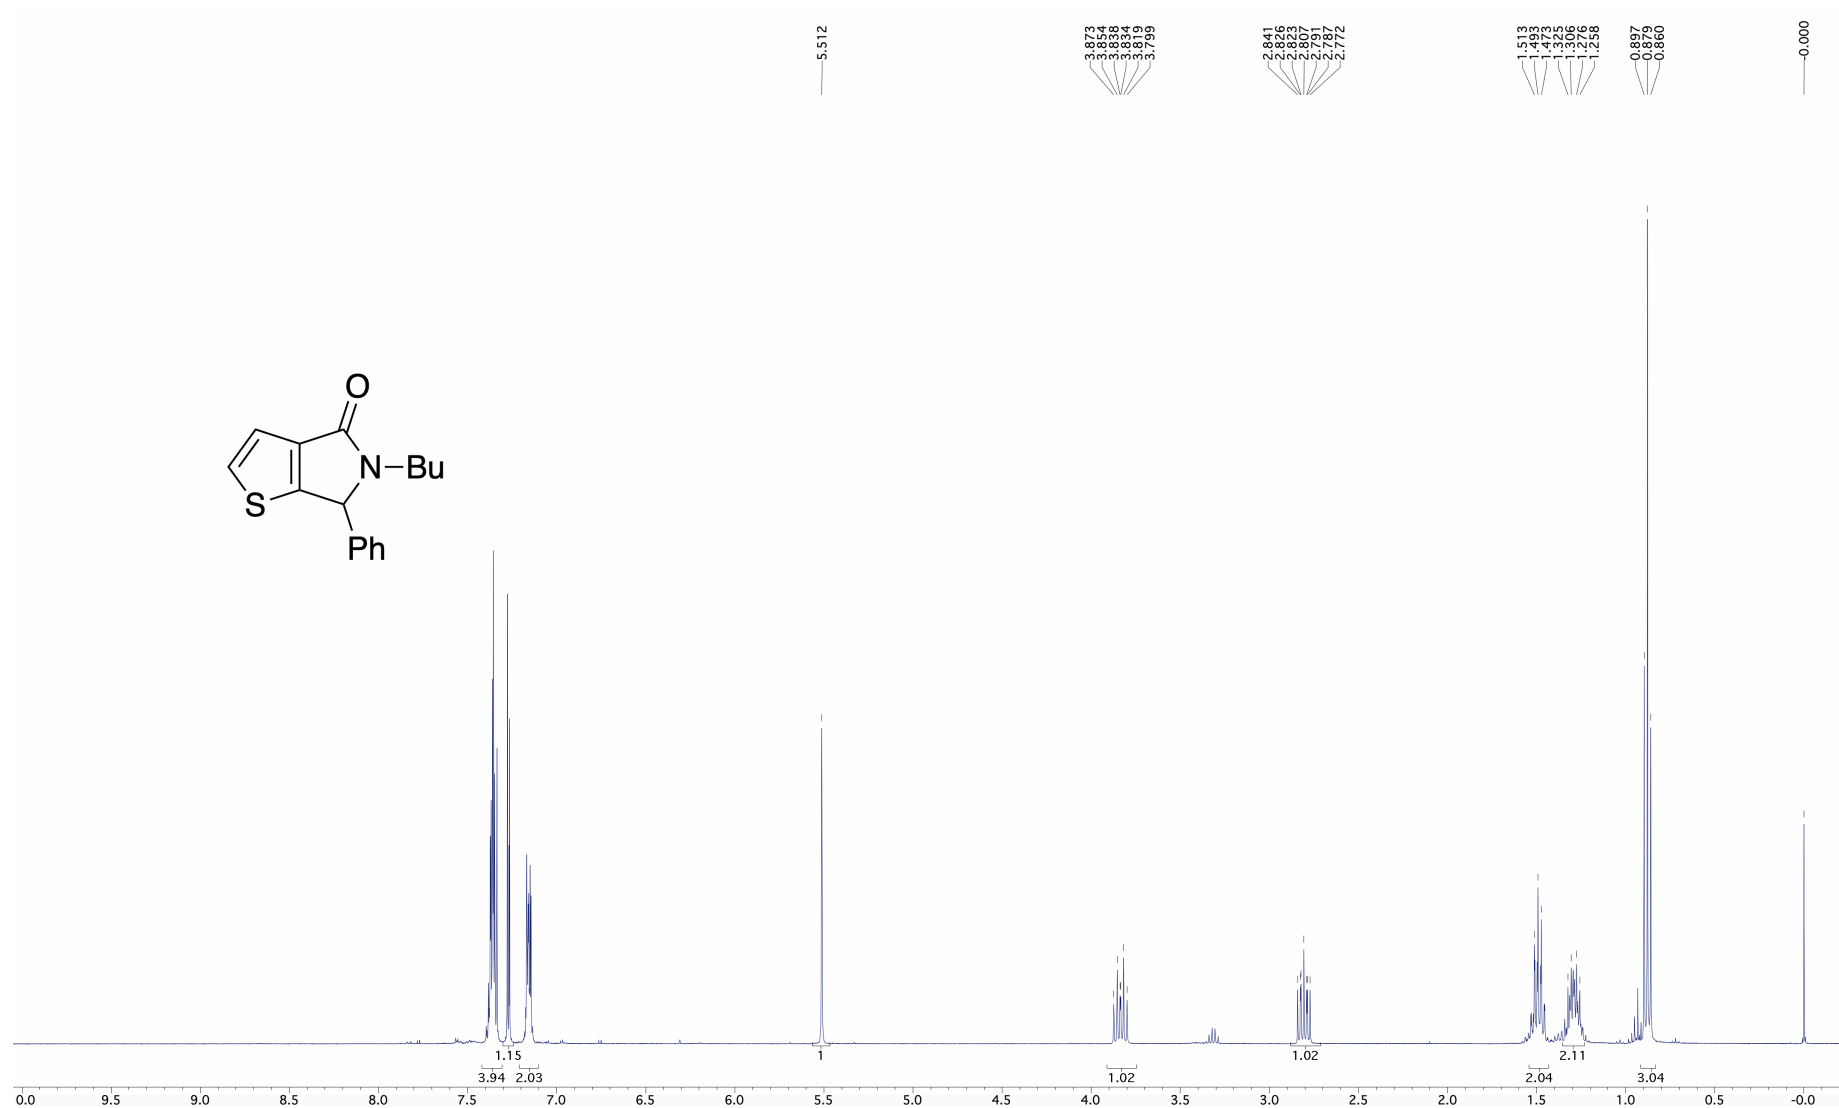

Figure S21. 125 MHz DEPTQ  $^{13}\text{C}$  NMR spectrum of **35**

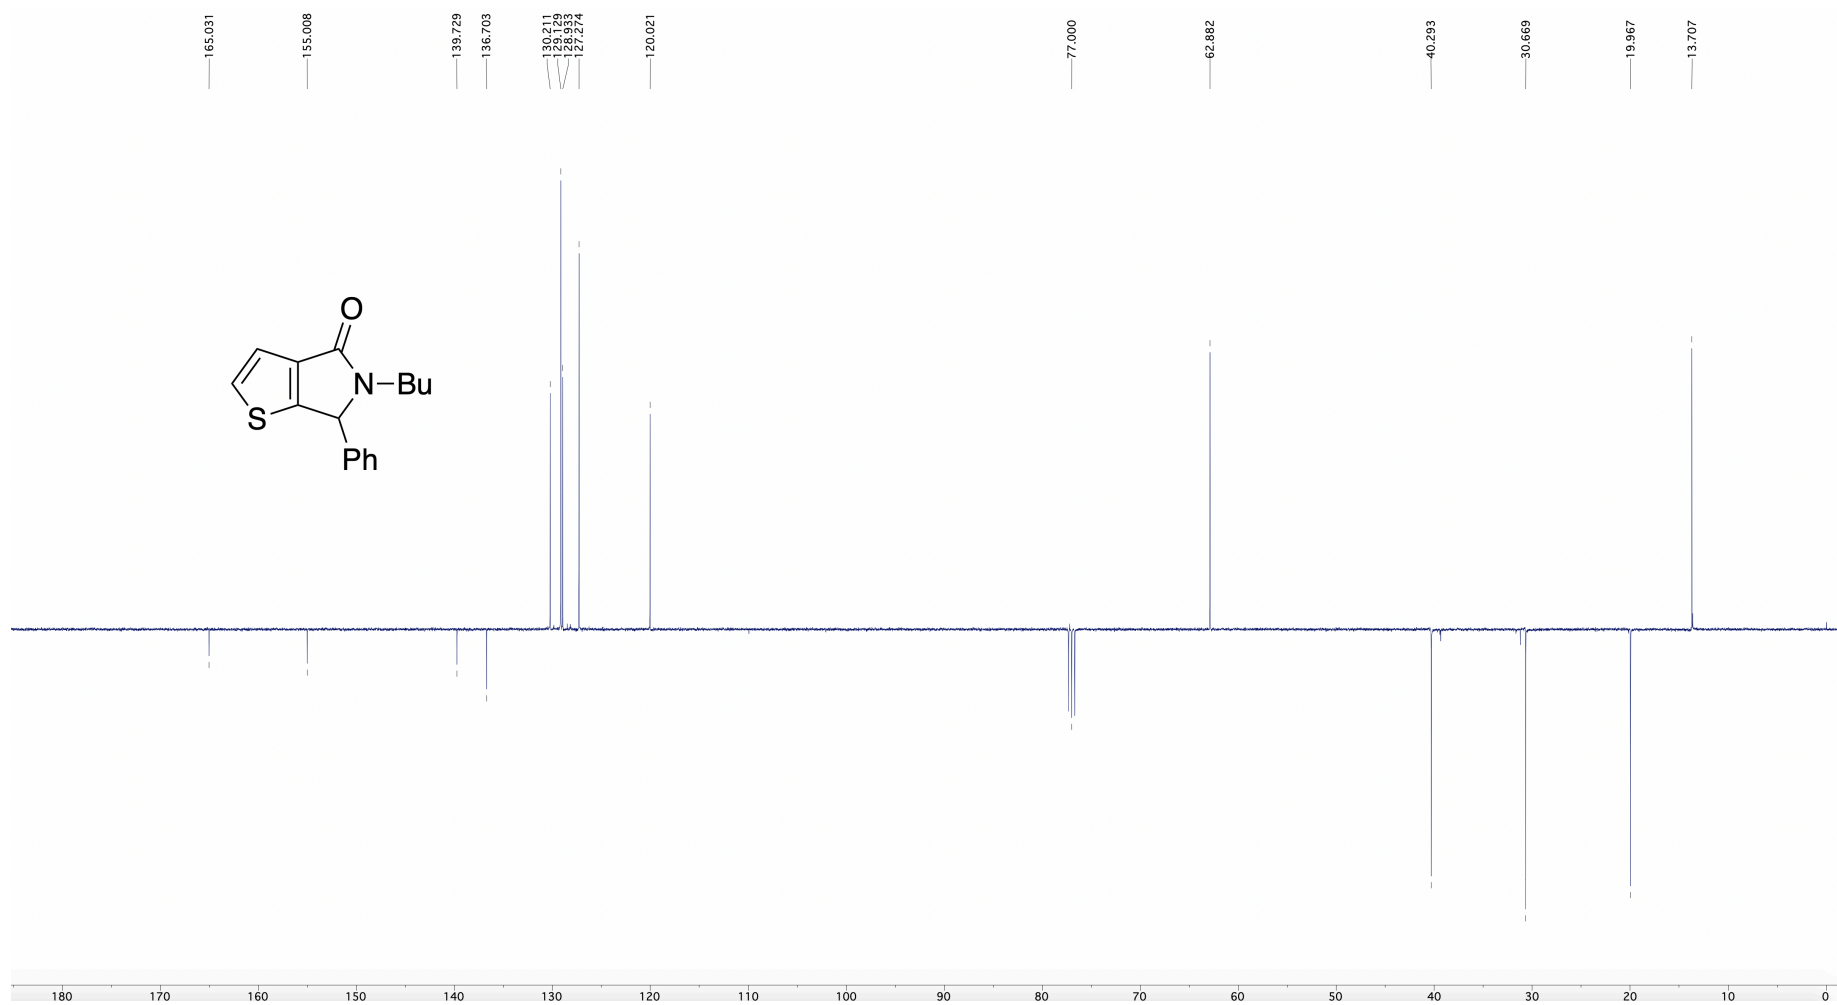

Figure S22. 400 MHz  $^1\text{H}$  NMR spectrum of **36**

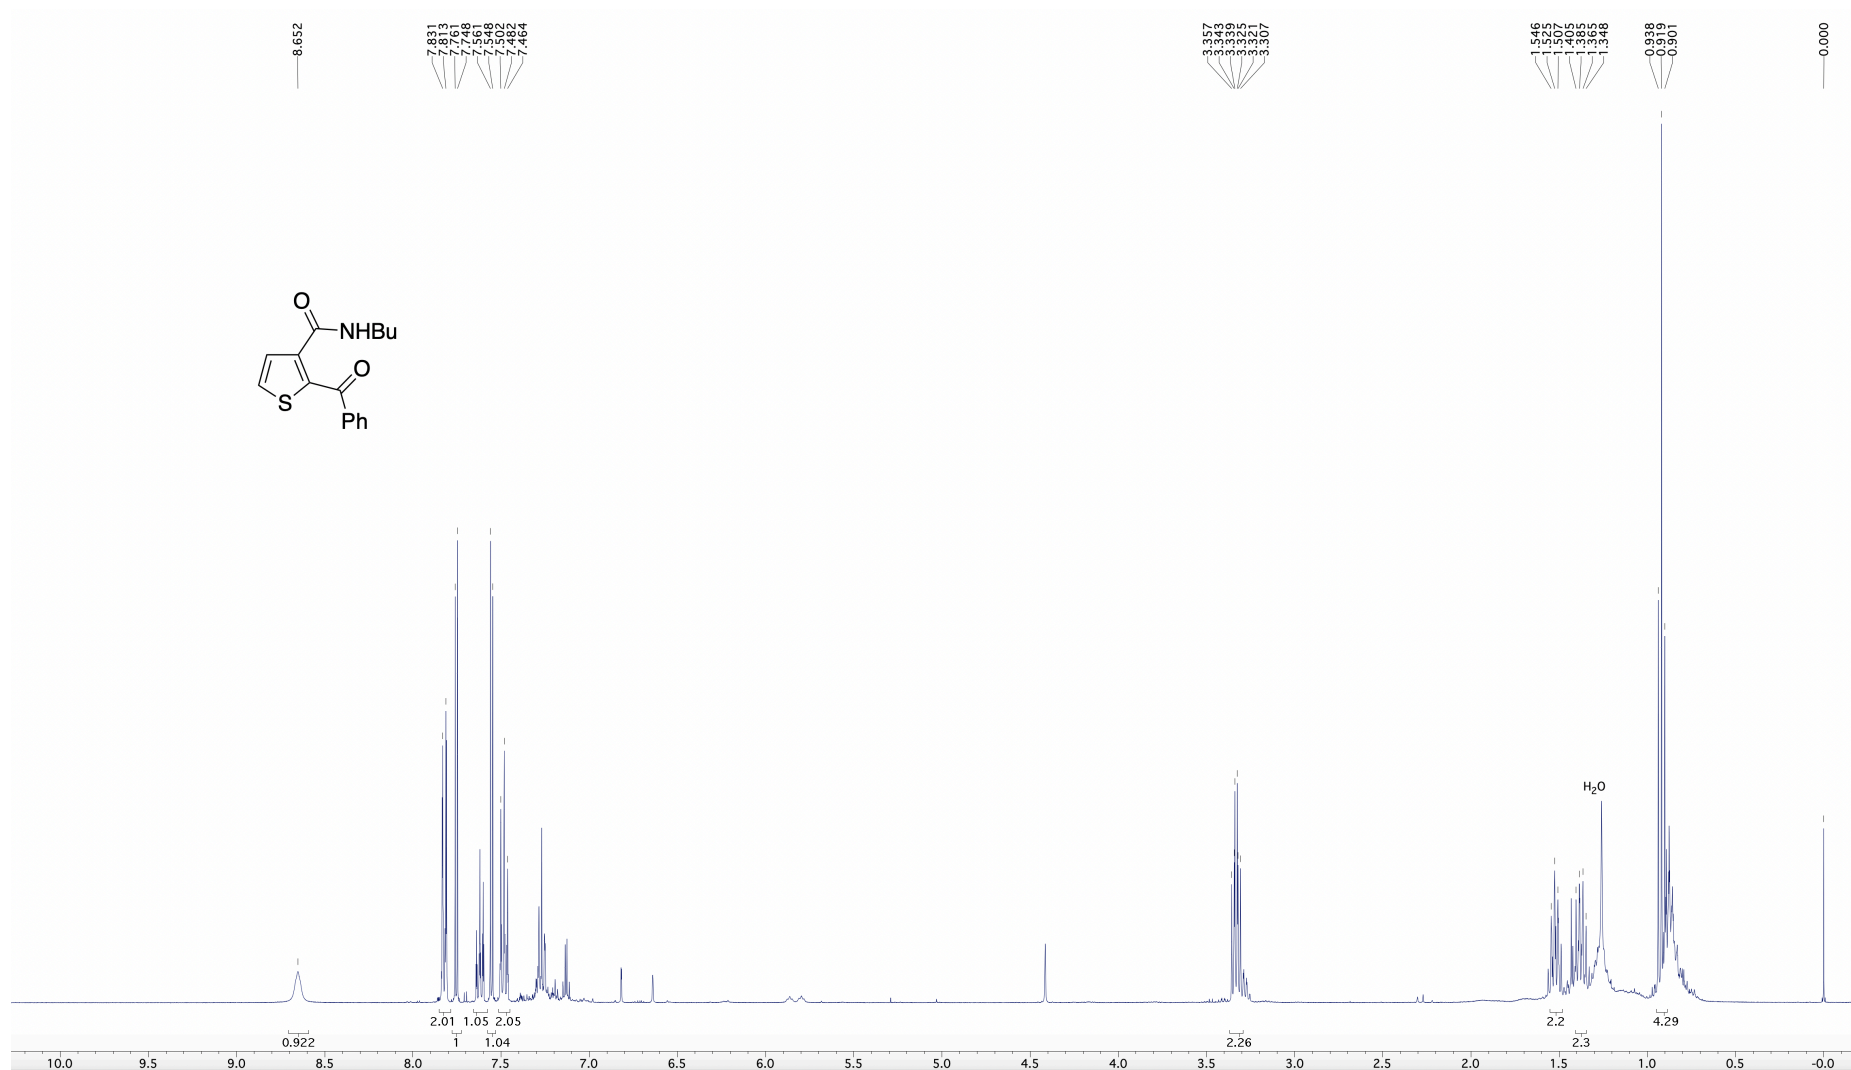

Figure S23. 100 MHz DEPTQ  $^{13}\text{C}$  NMR spectrum of **36**

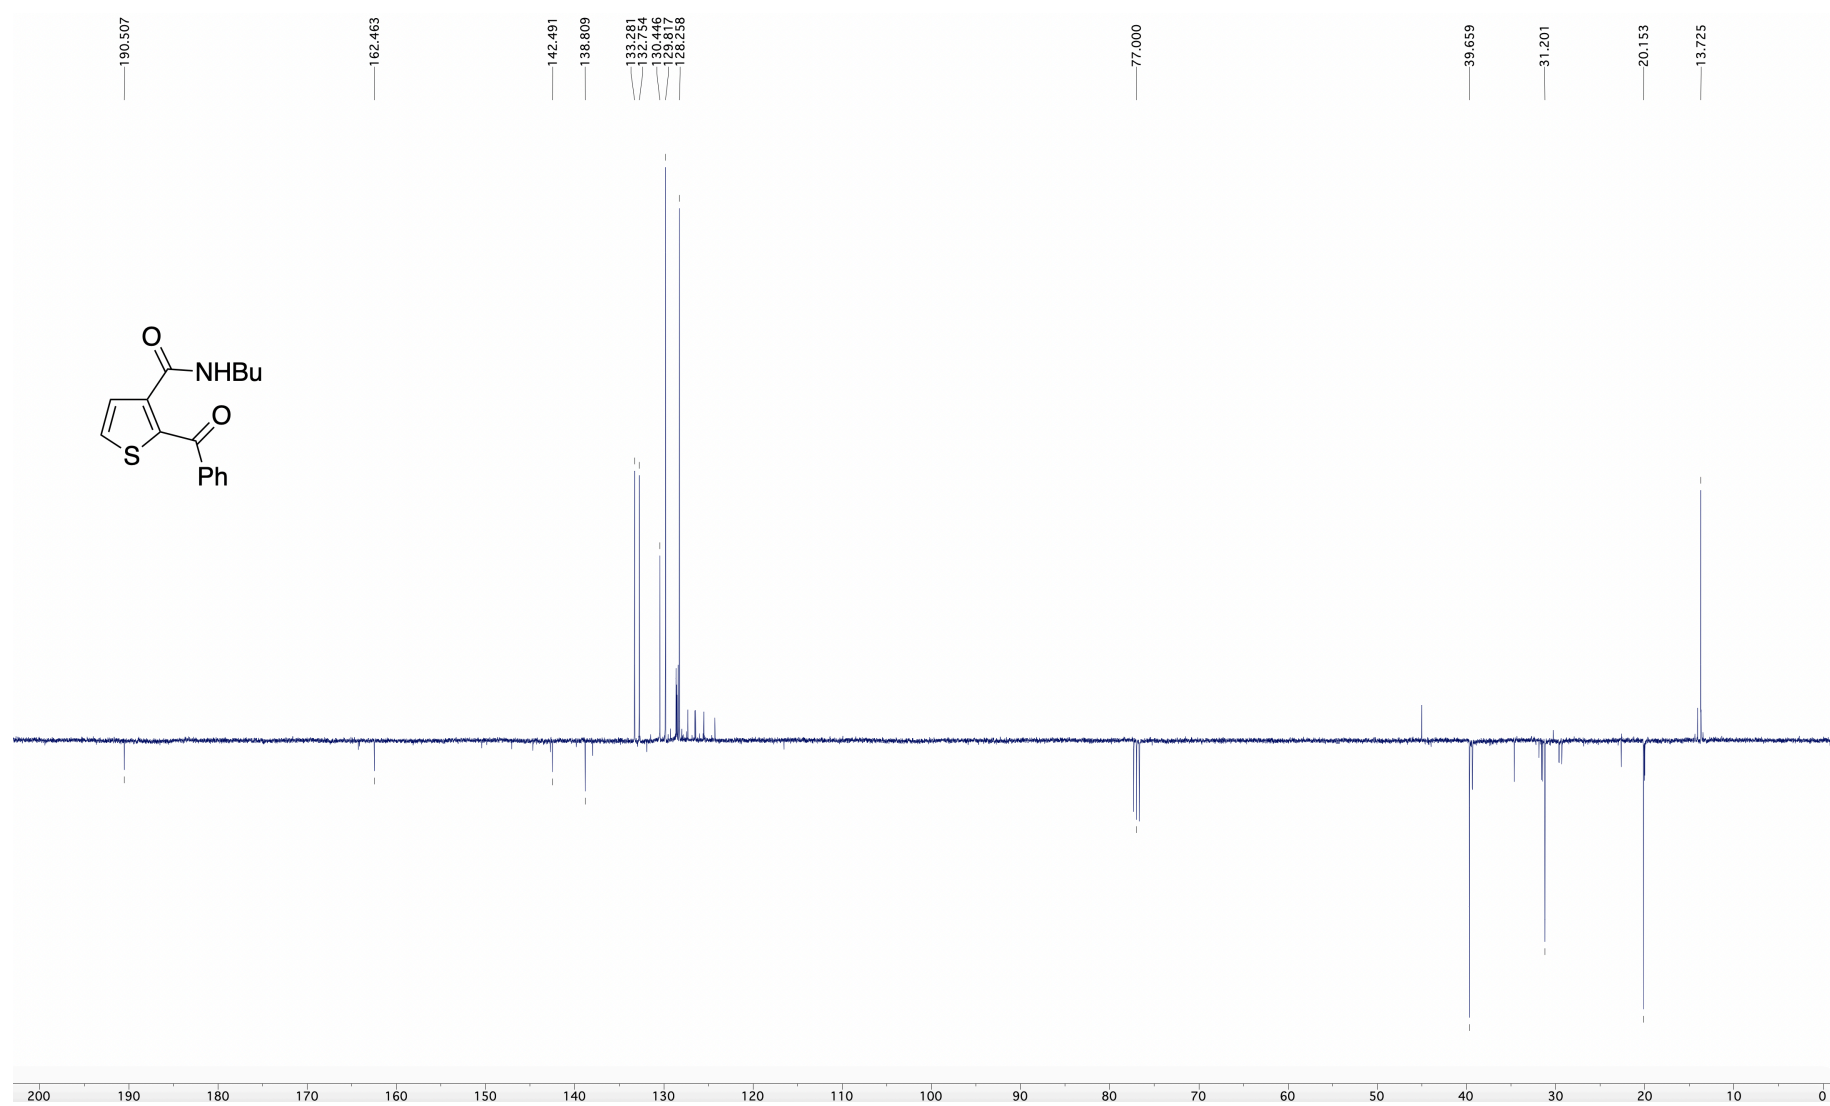

Figure S24. 100 MHz DEPTQ  $^{13}\text{C}$  NMR spectrum of **37**

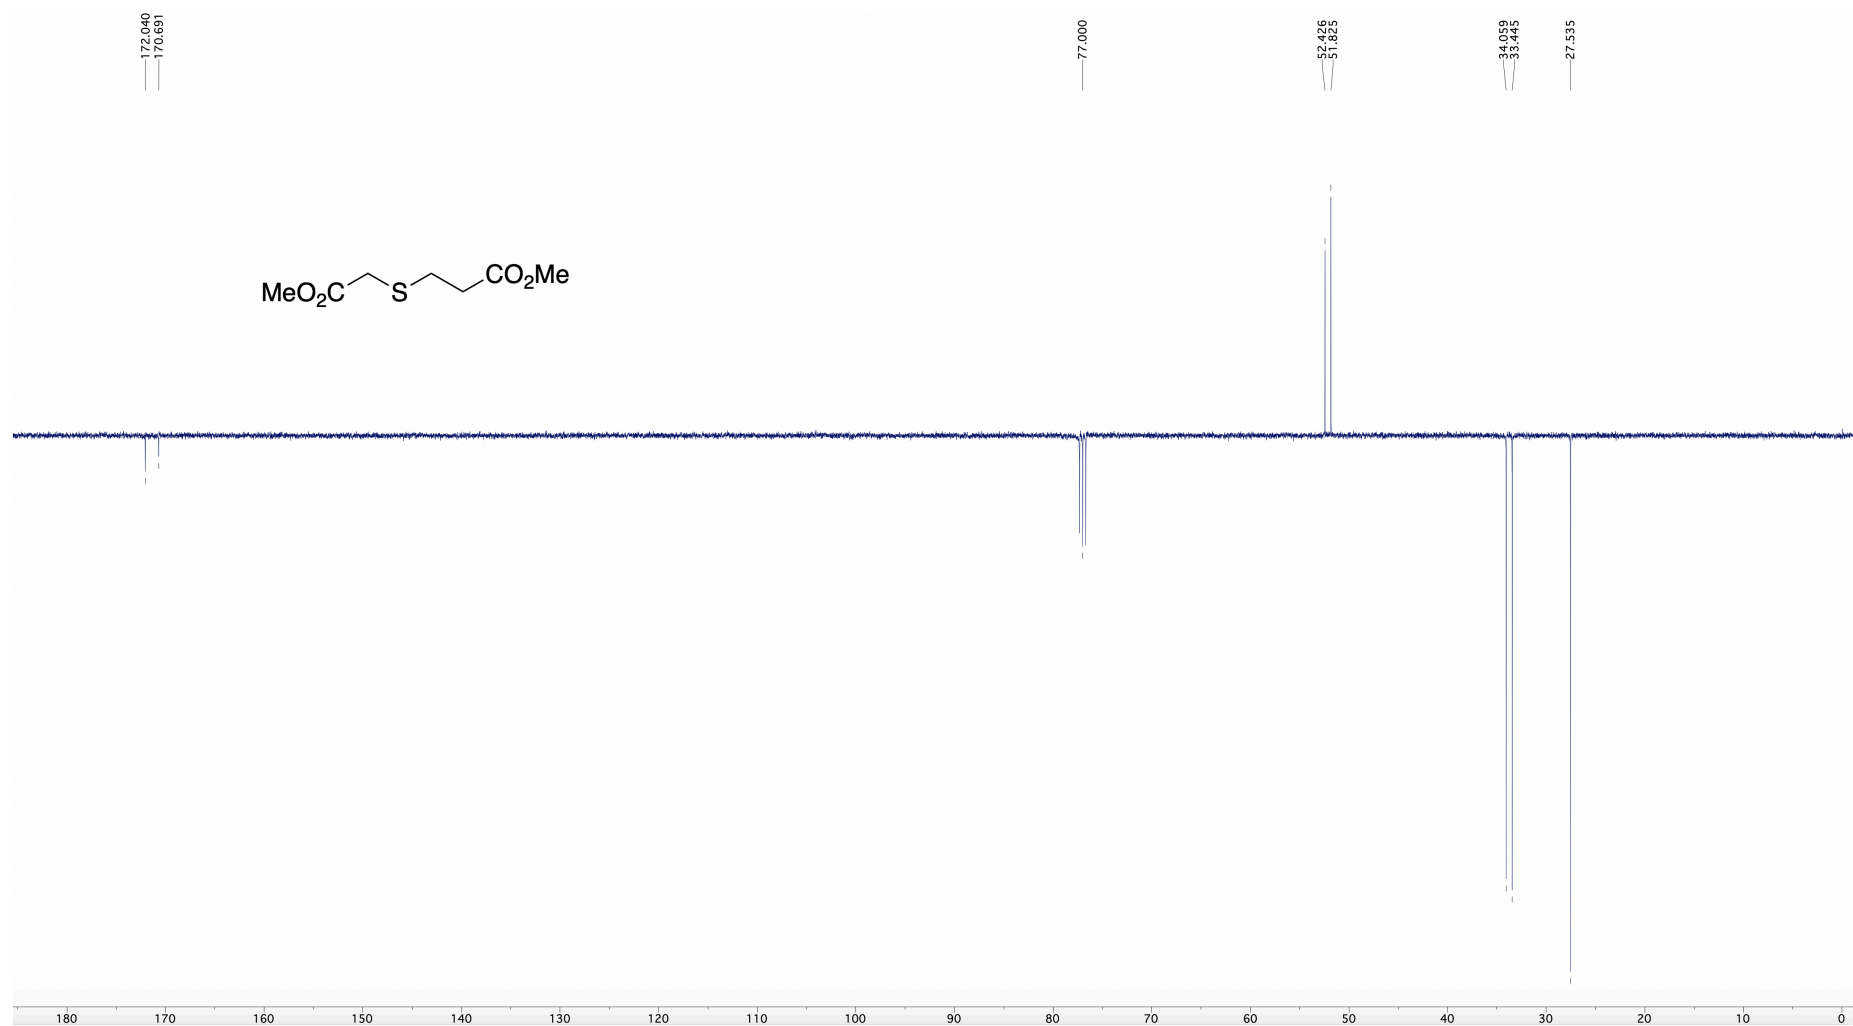

Figure S25. 125 MHz DEPTQ  $^{13}\text{C}$  NMR spectrum of **39**

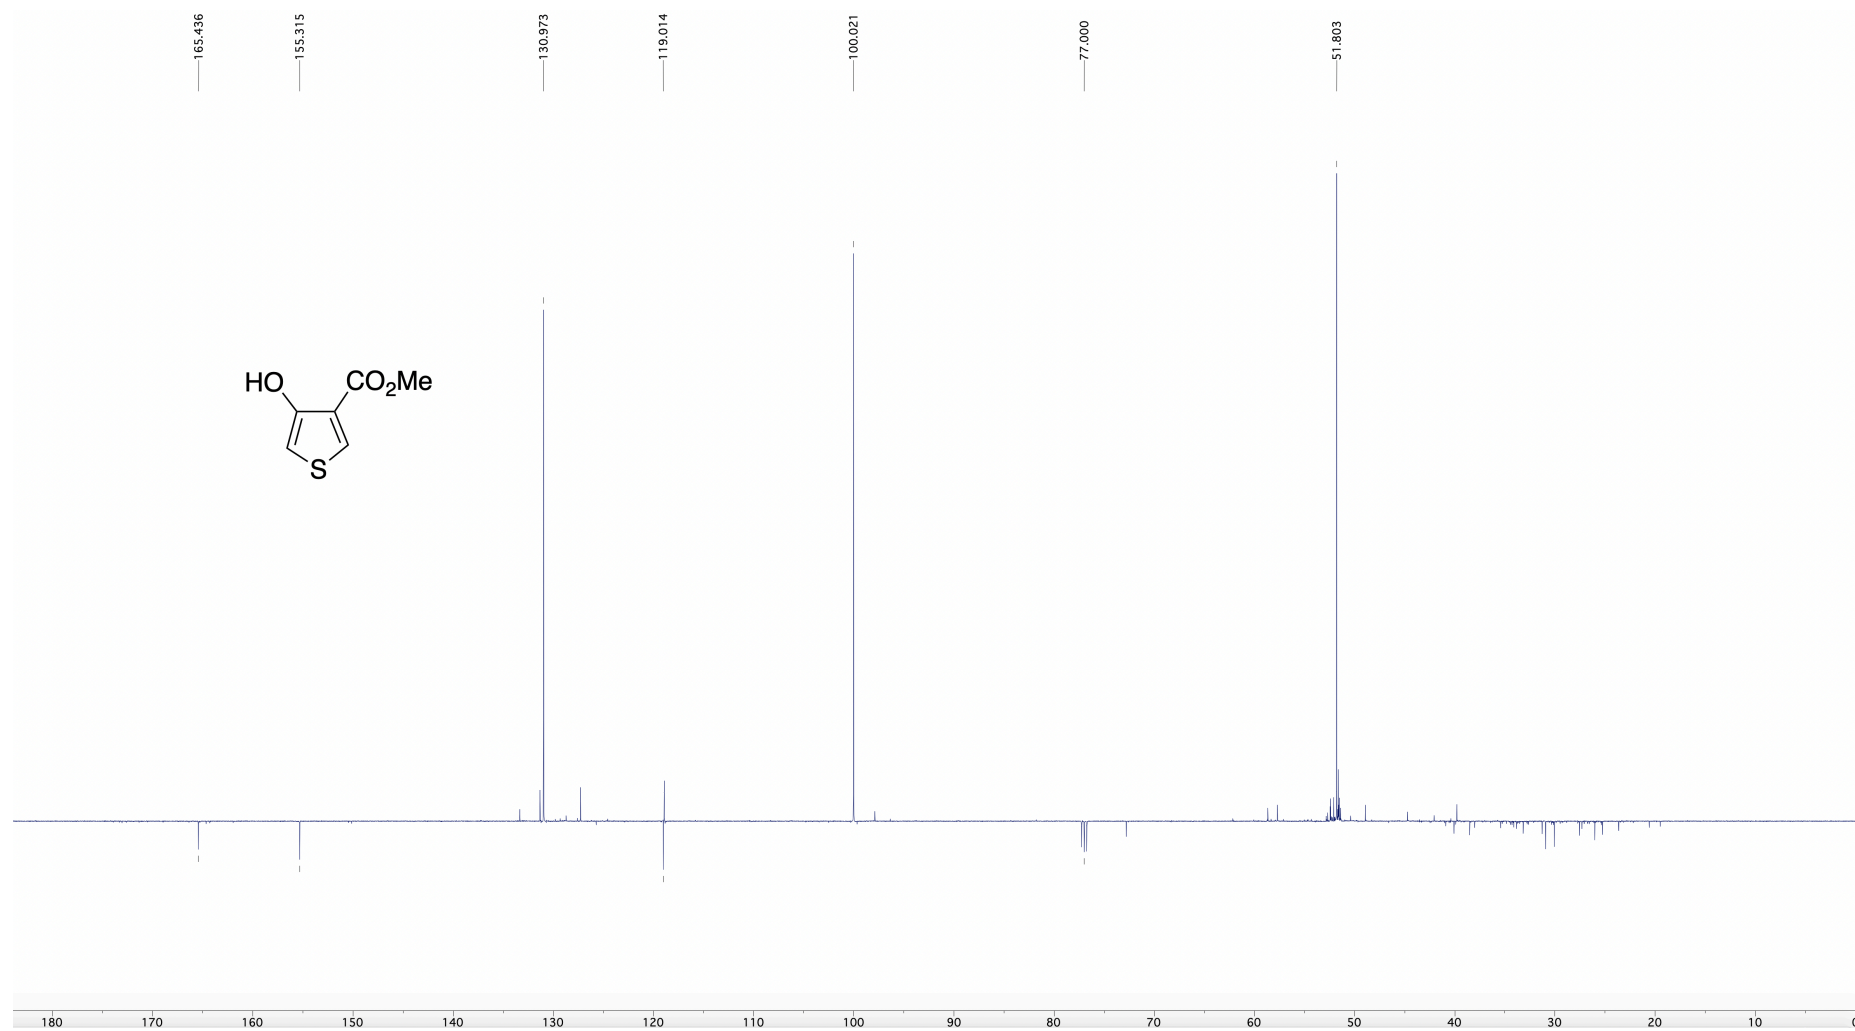

Figure S26. 500 MHz  $^1\text{H}$  NMR spectrum of **41**

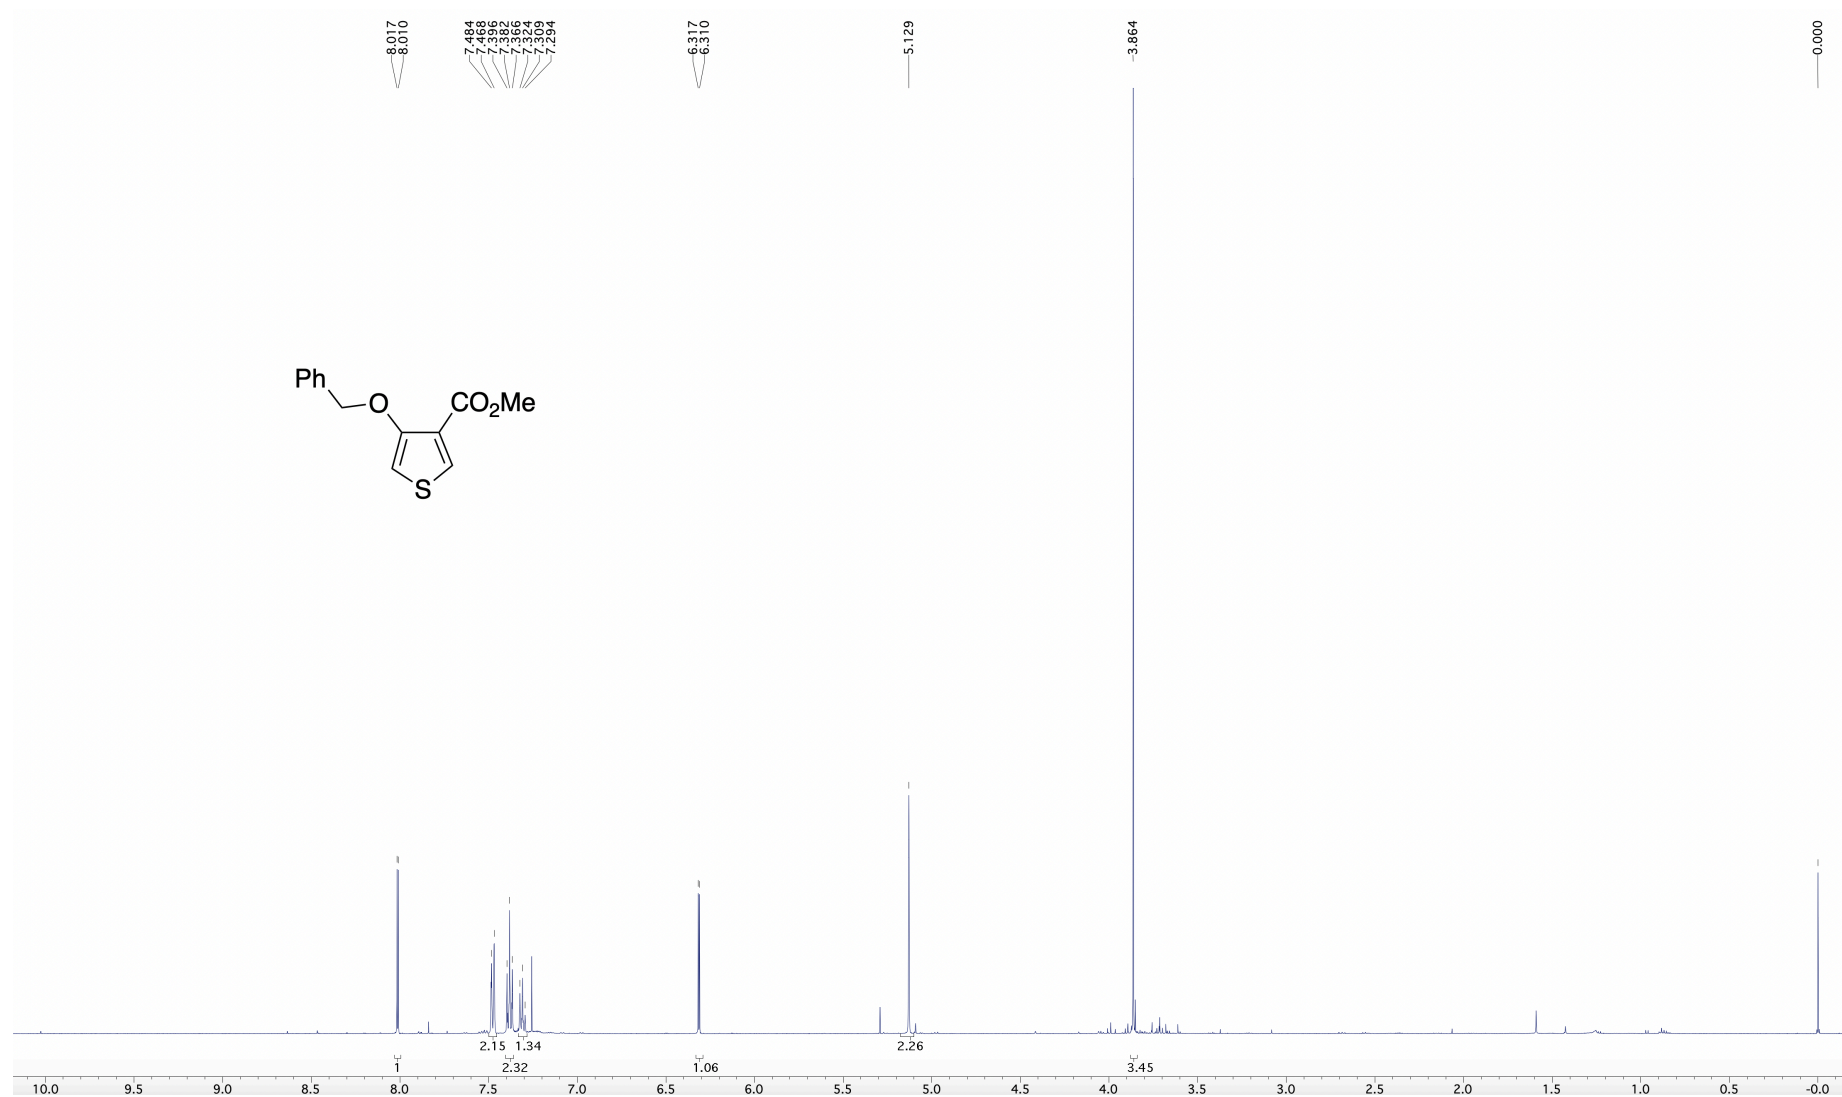

Figure S27. 125 MHz DEPTQ  $^{13}\text{C}$  NMR spectrum of **41**

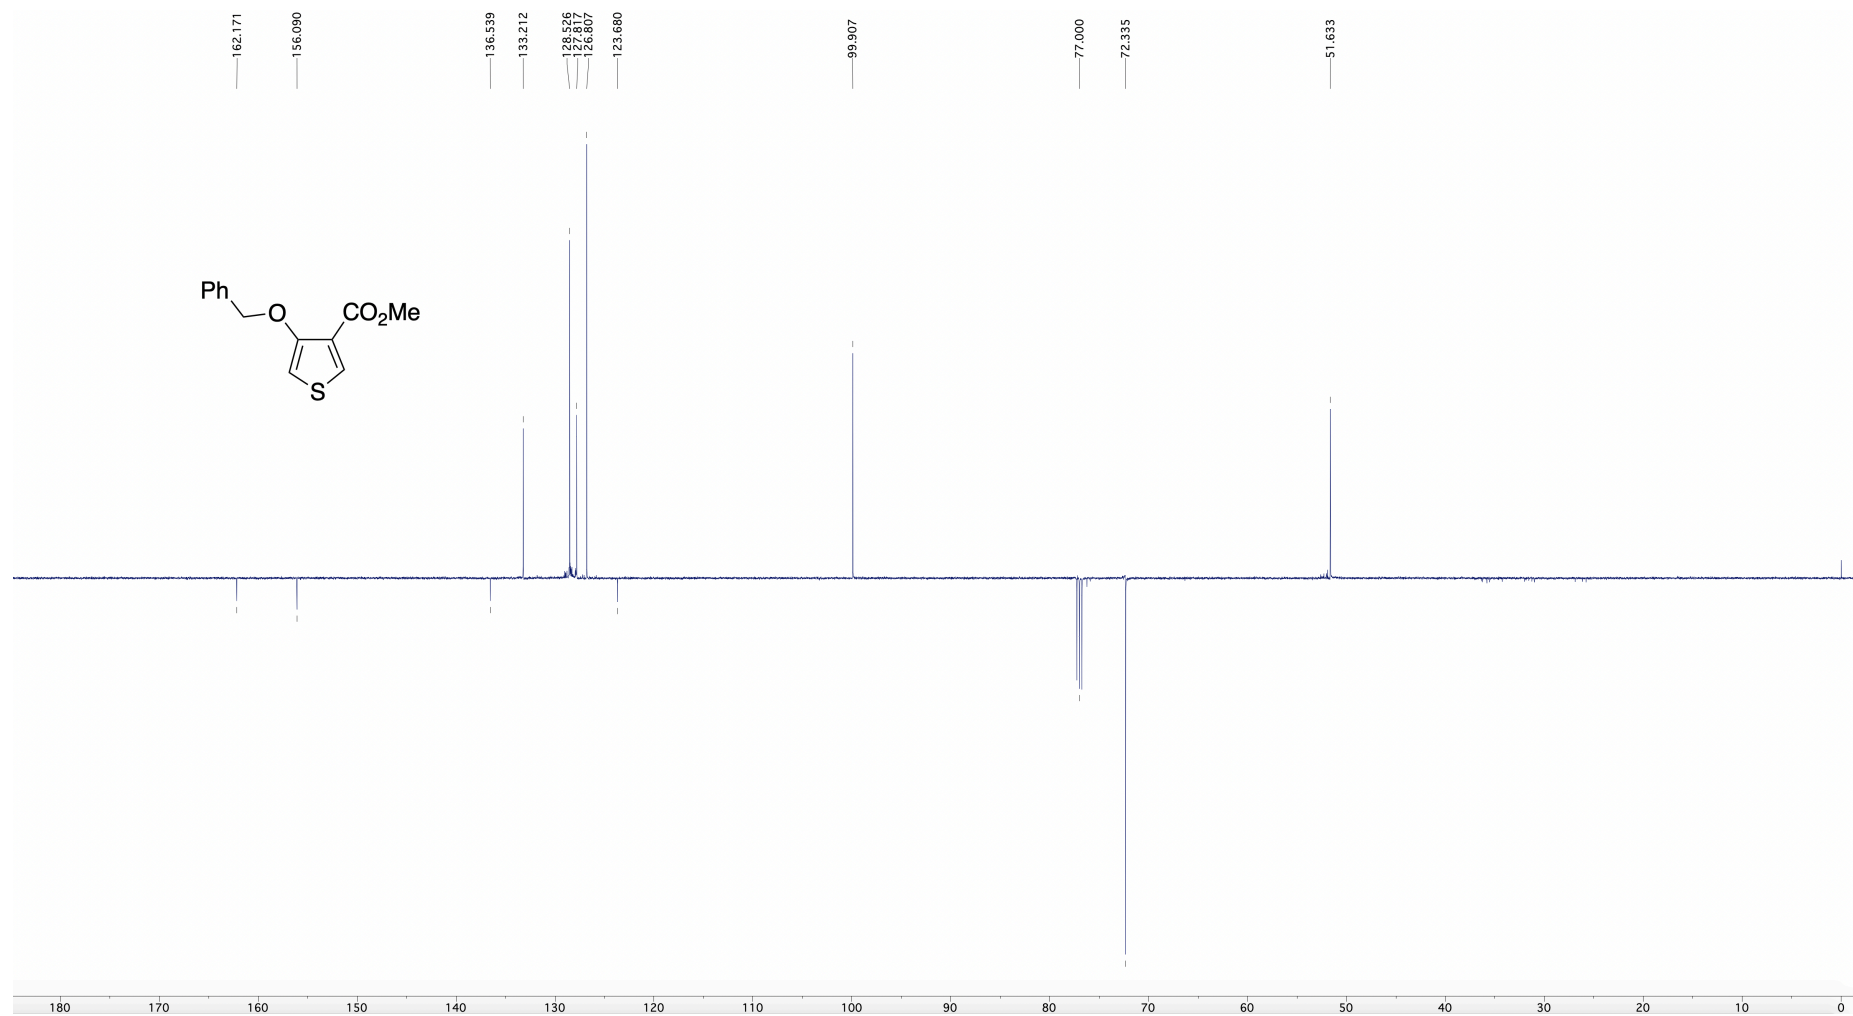

Figure S28. 500 MHz  $^1\text{H}$  NMR spectrum of **42**

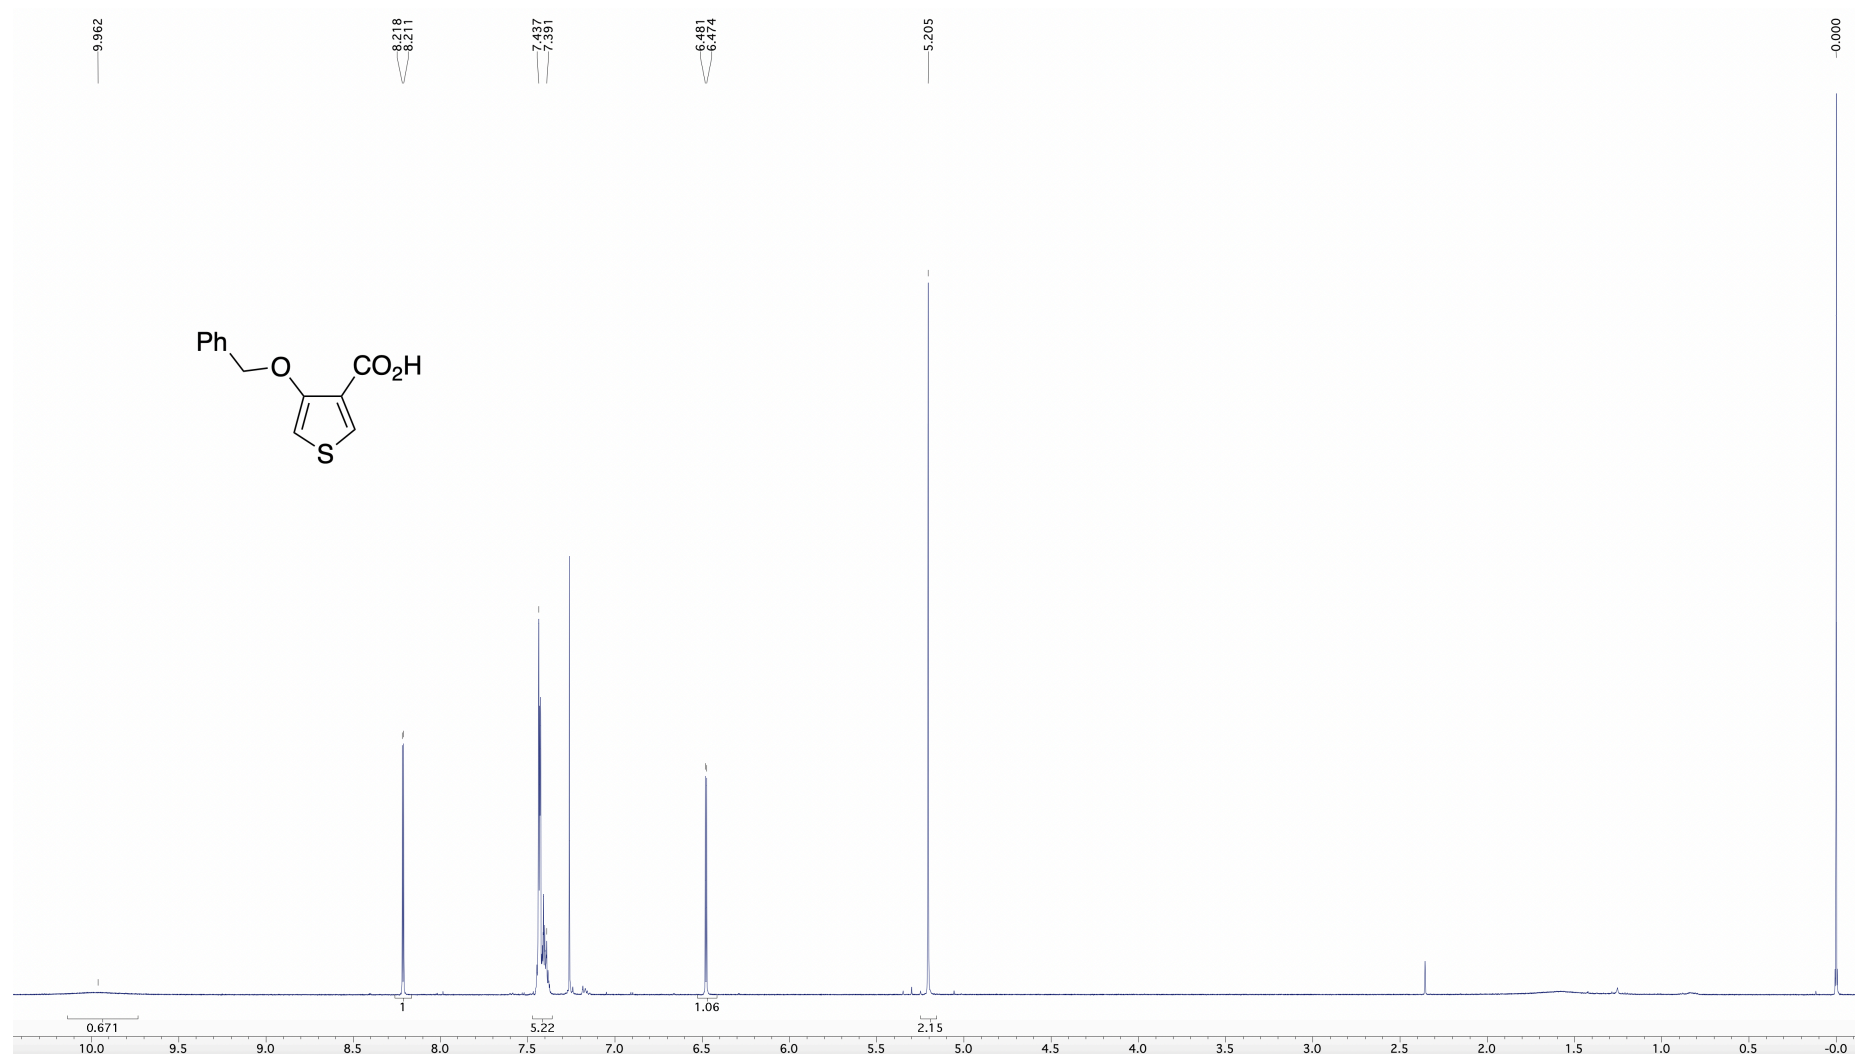

Figure S29. 125 MHz DEPTQ  $^{13}\text{C}$  NMR spectrum of **42**

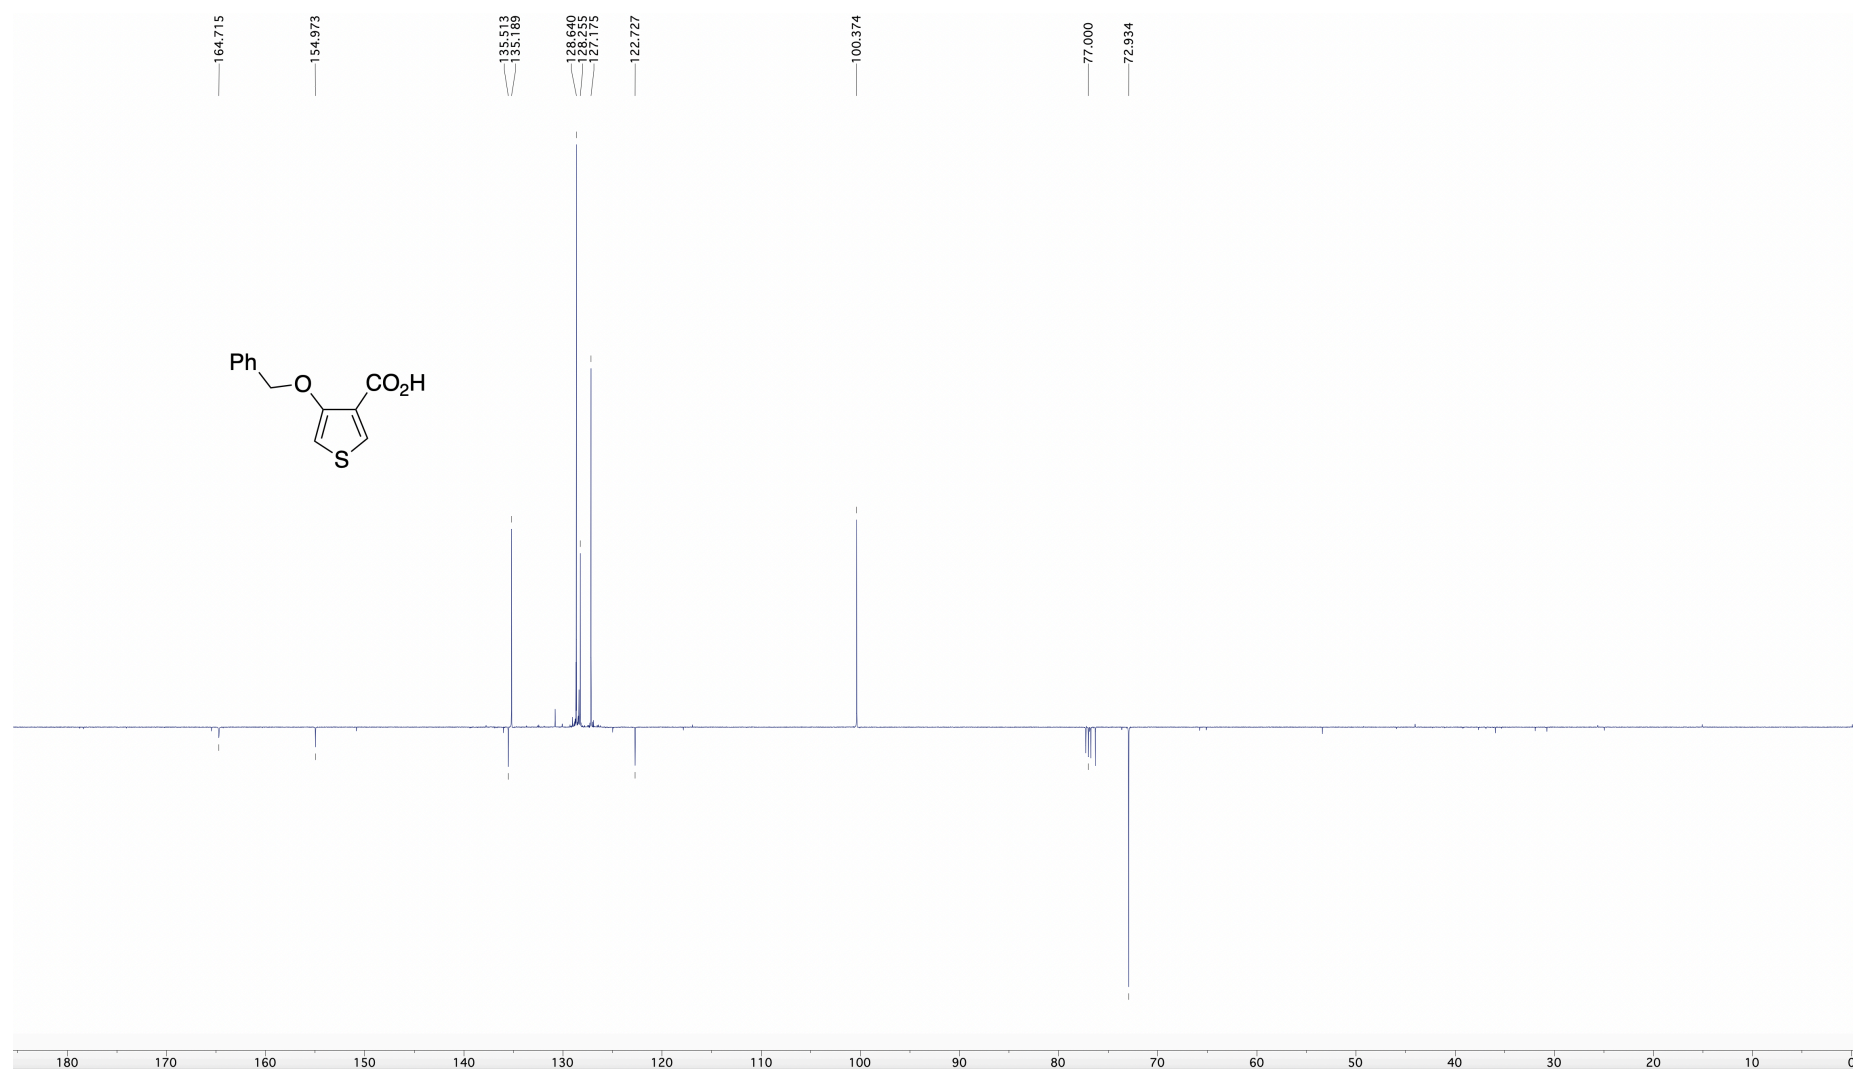

Figure S30. 400 MHz  $^1\text{H}$  NMR spectrum of **43**

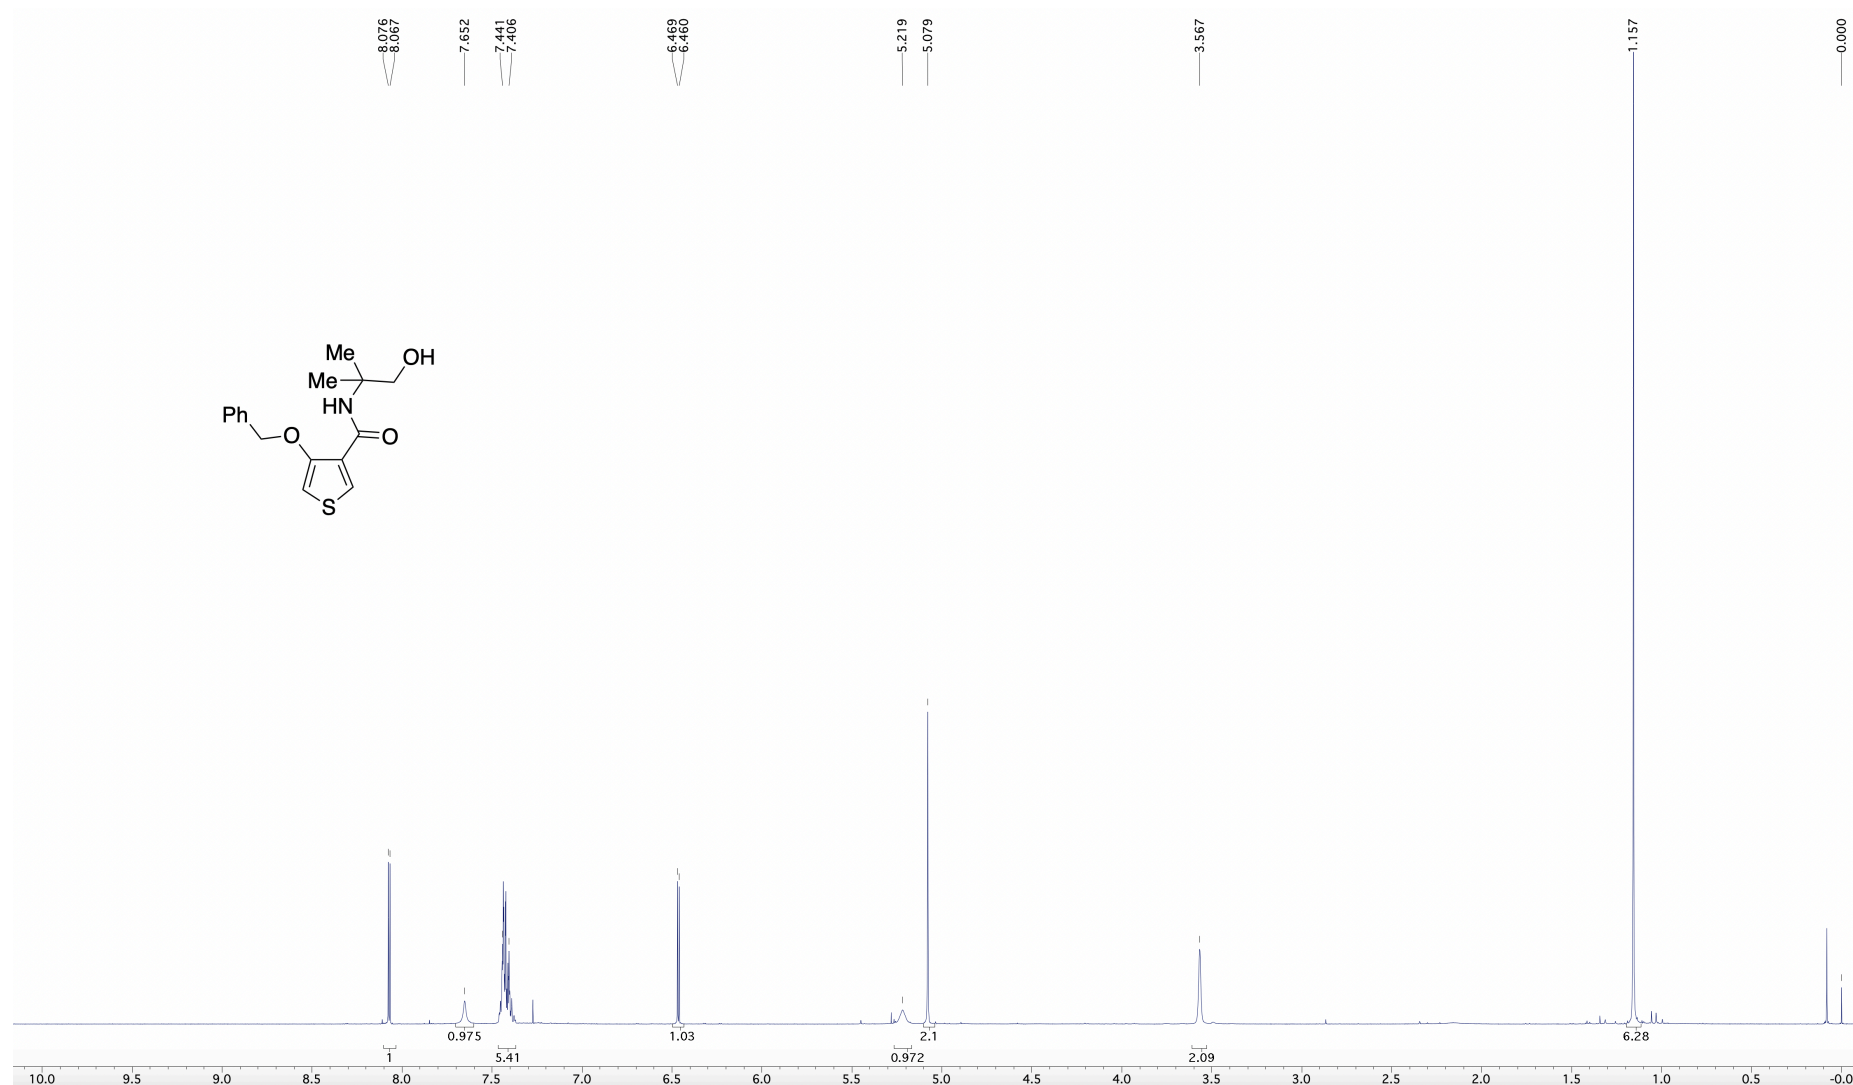

Figure S31. 100 MHz DEPTQ  $^{13}\text{C}$  NMR spectrum of **43**

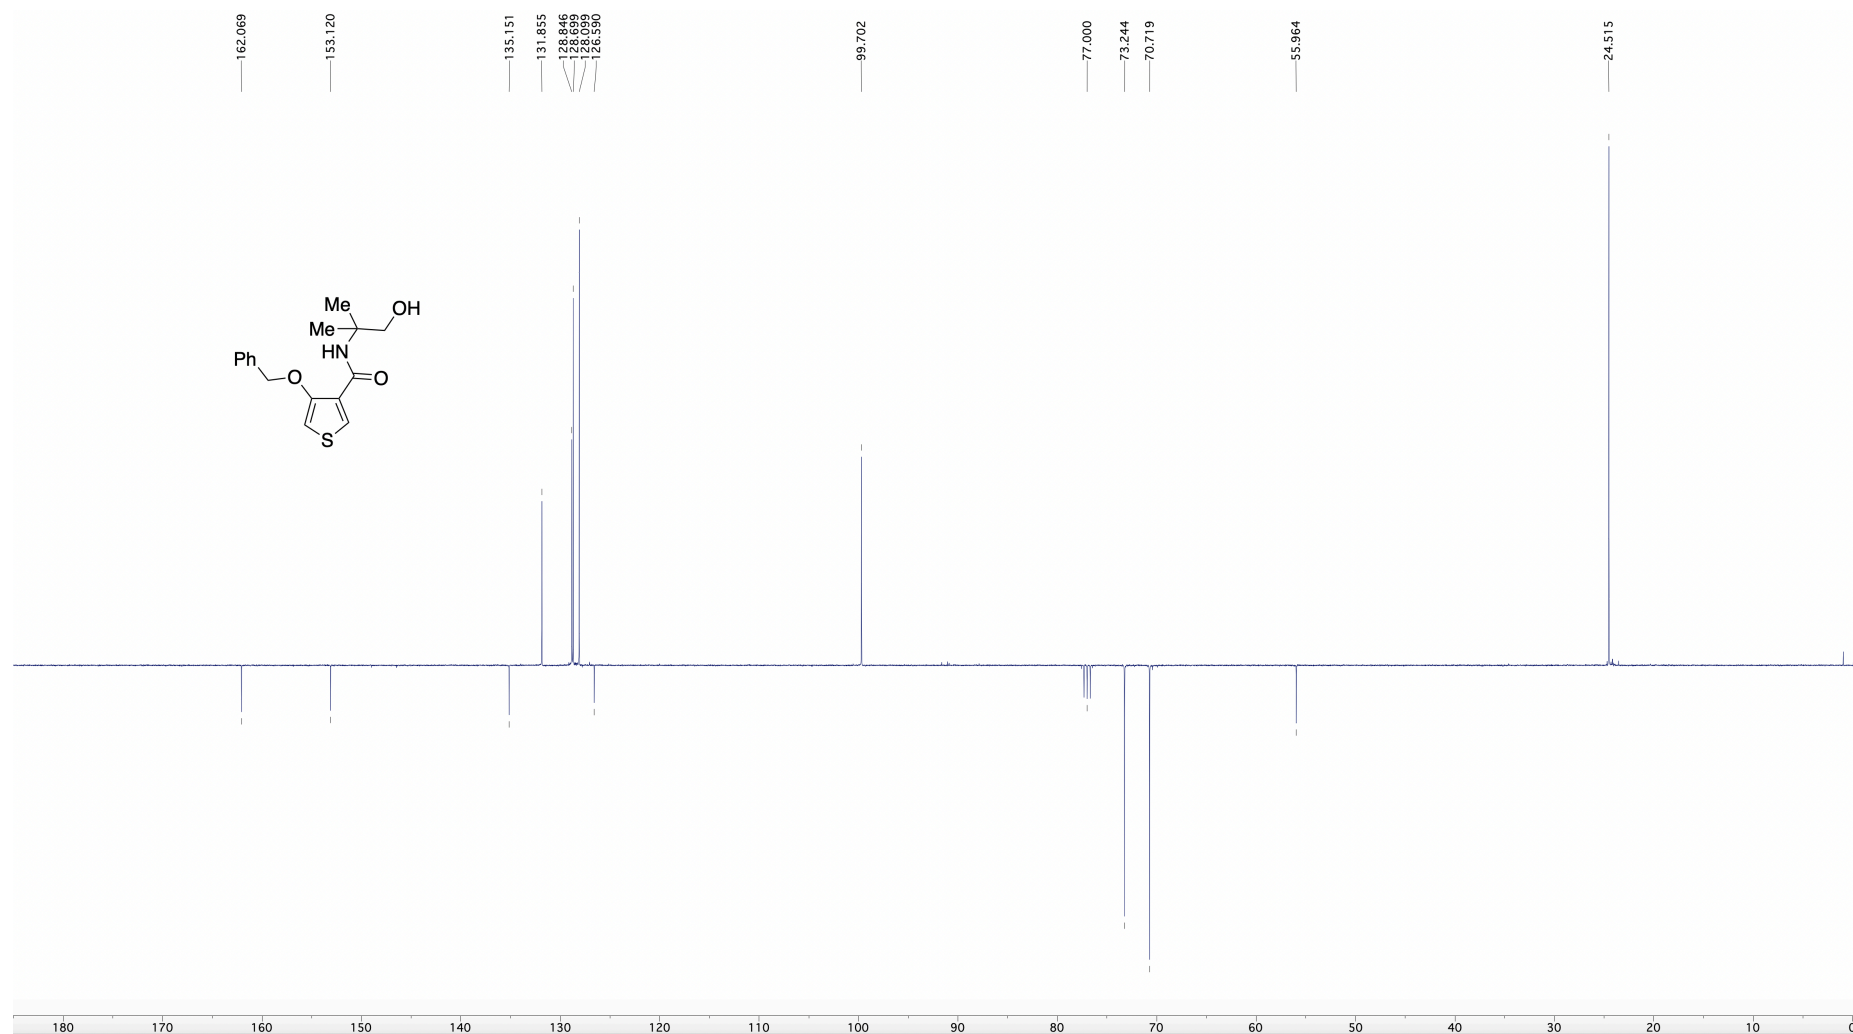

Figure S32. 400 MHz  $^1\text{H}$  NMR spectrum of **13**

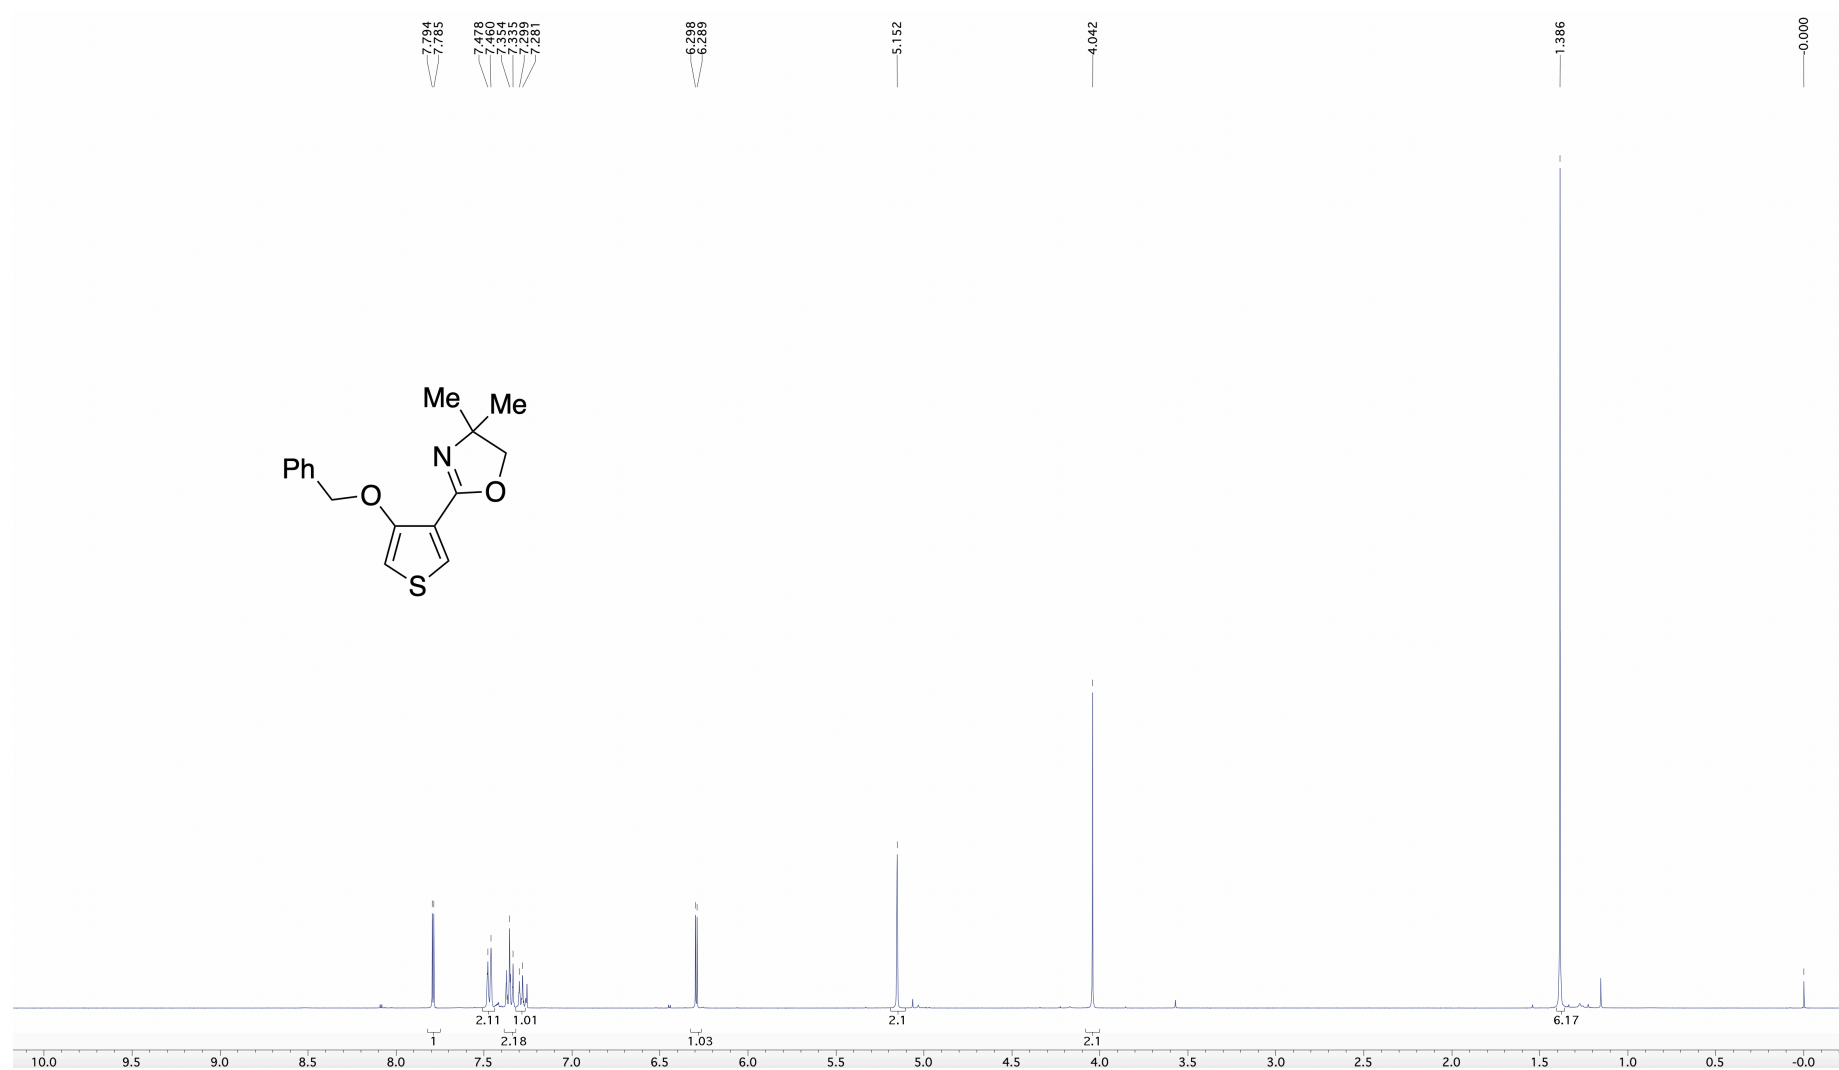

Figure S33. 100 MHz DEPTQ  $^{13}\text{C}$  NMR spectrum of **13**

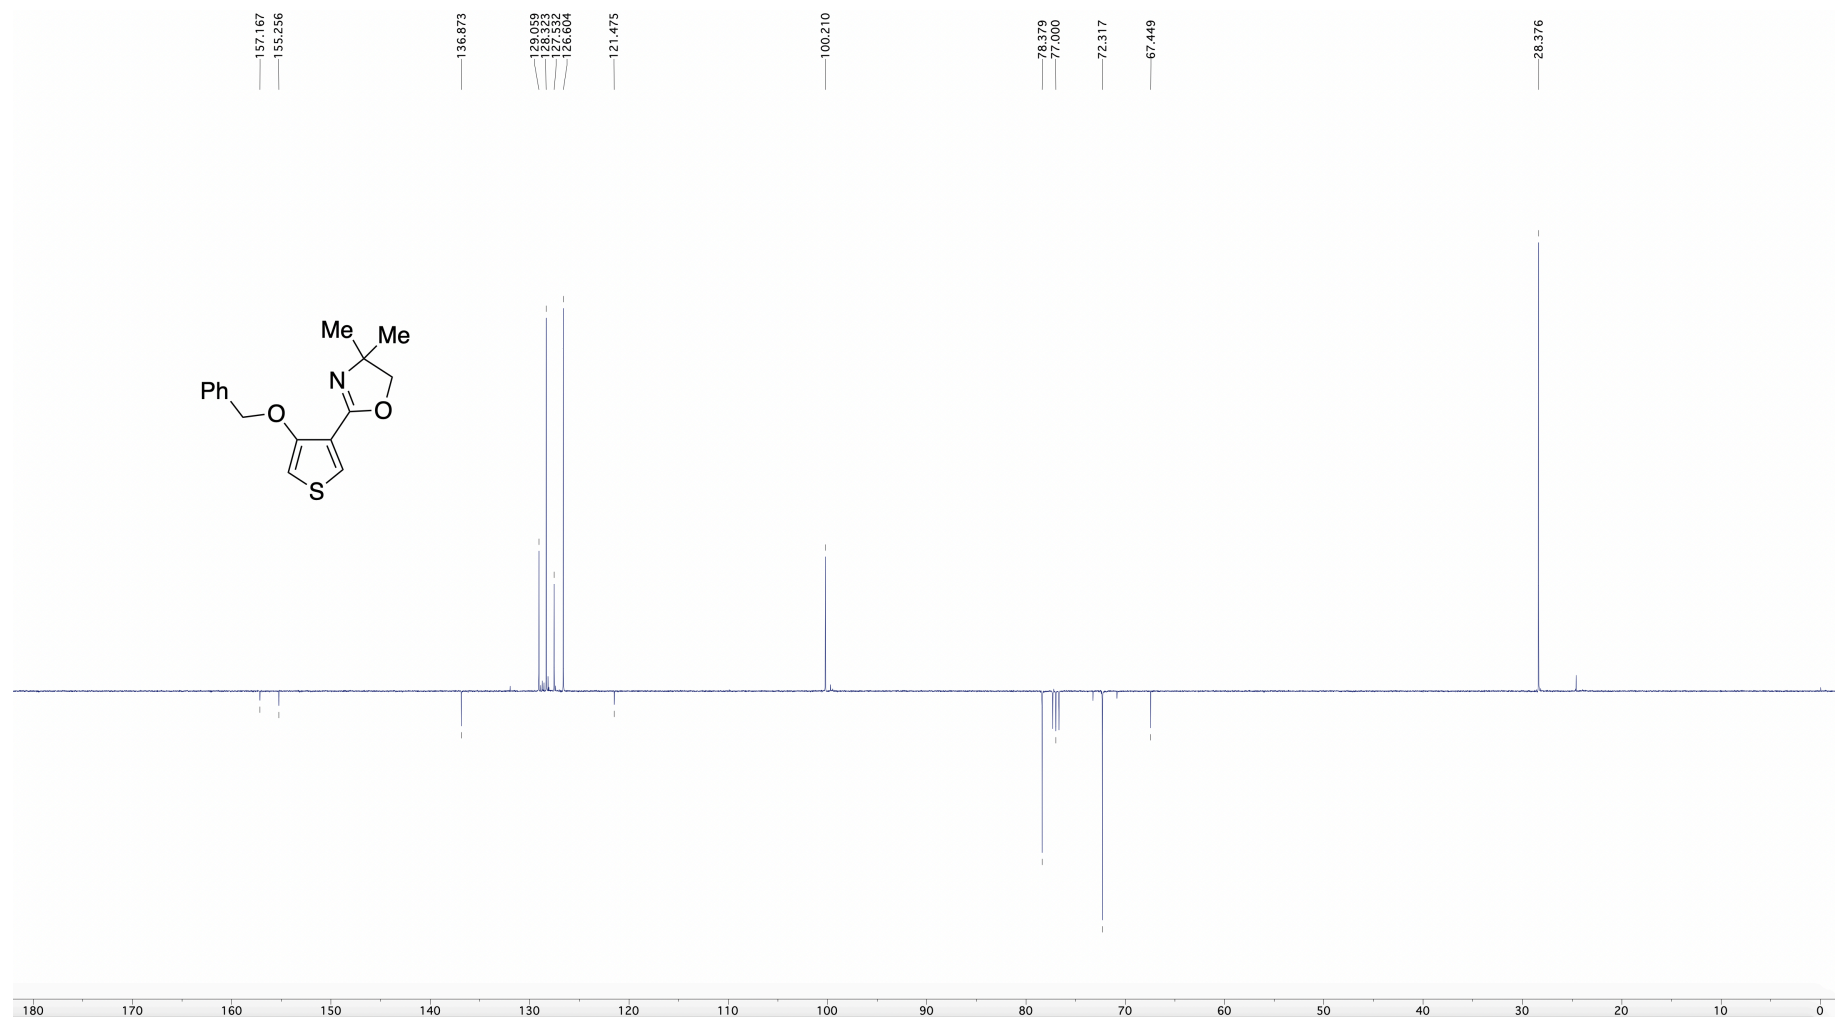

CC(C)(CO)NC(=O)c1ccsc1OC(=O)c2ccccc2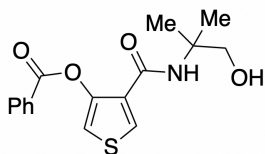

Figure S35. 125 MHz DEPTQ  $^{13}\text{C}$  NMR spectrum of **45**

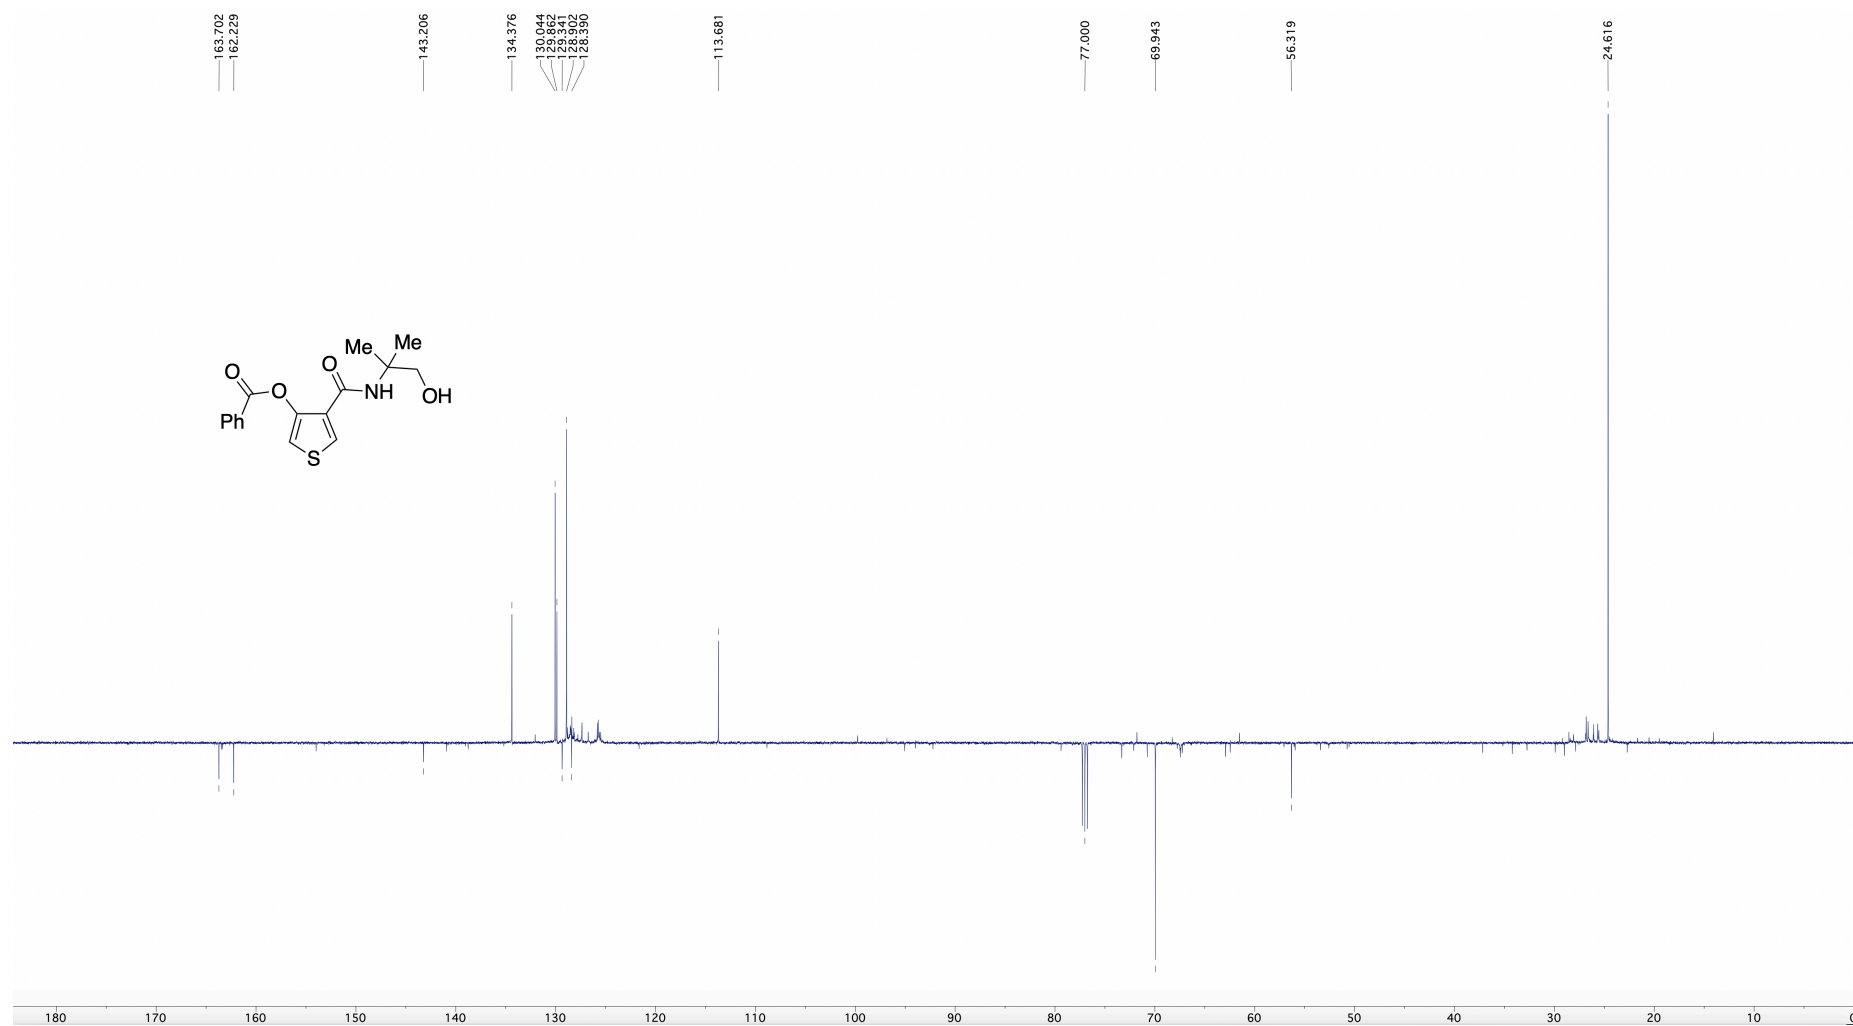

Figure S36. 400 MHz  $^1\text{H}$  NMR spectrum of **14**

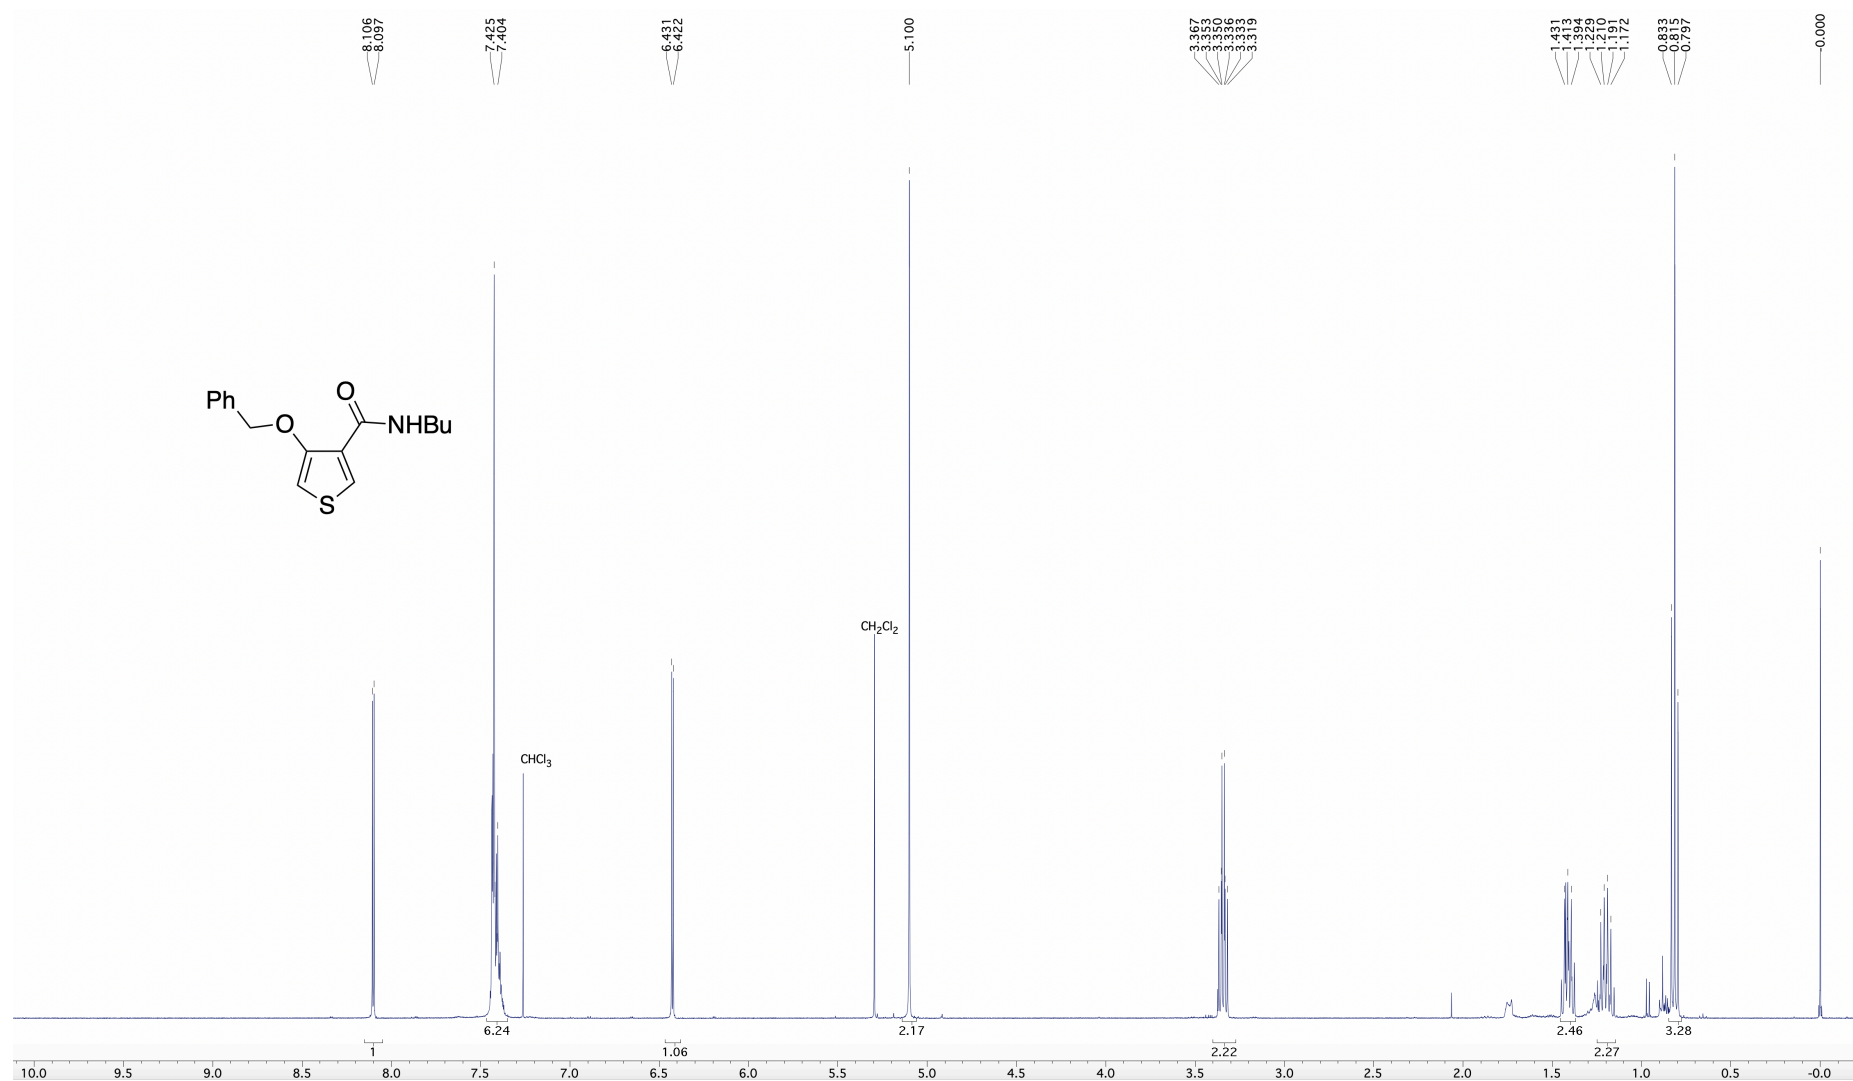

Figure S37. 10 MHz DEPTQ  $^{13}\text{C}$  NMR spectrum of **14**

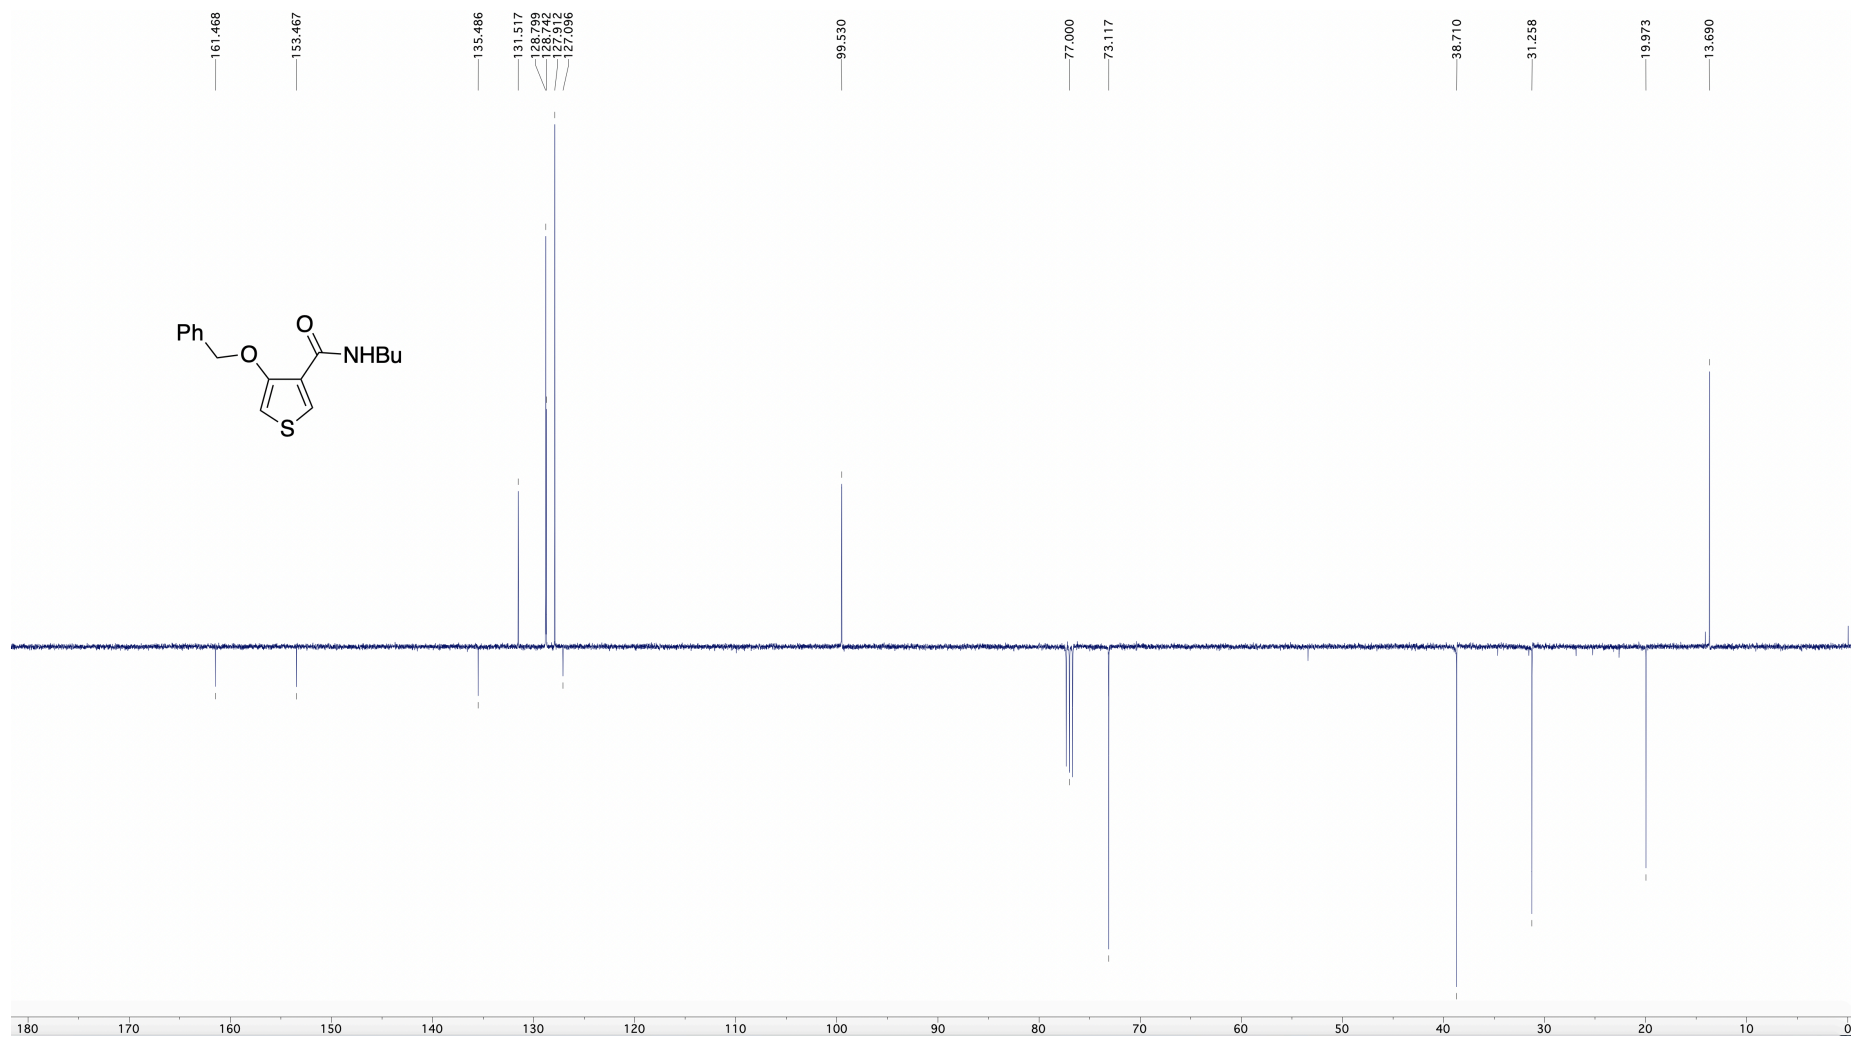

Figure S38. 400 MHz  $^1\text{H}$  NMR spectrum of **46**

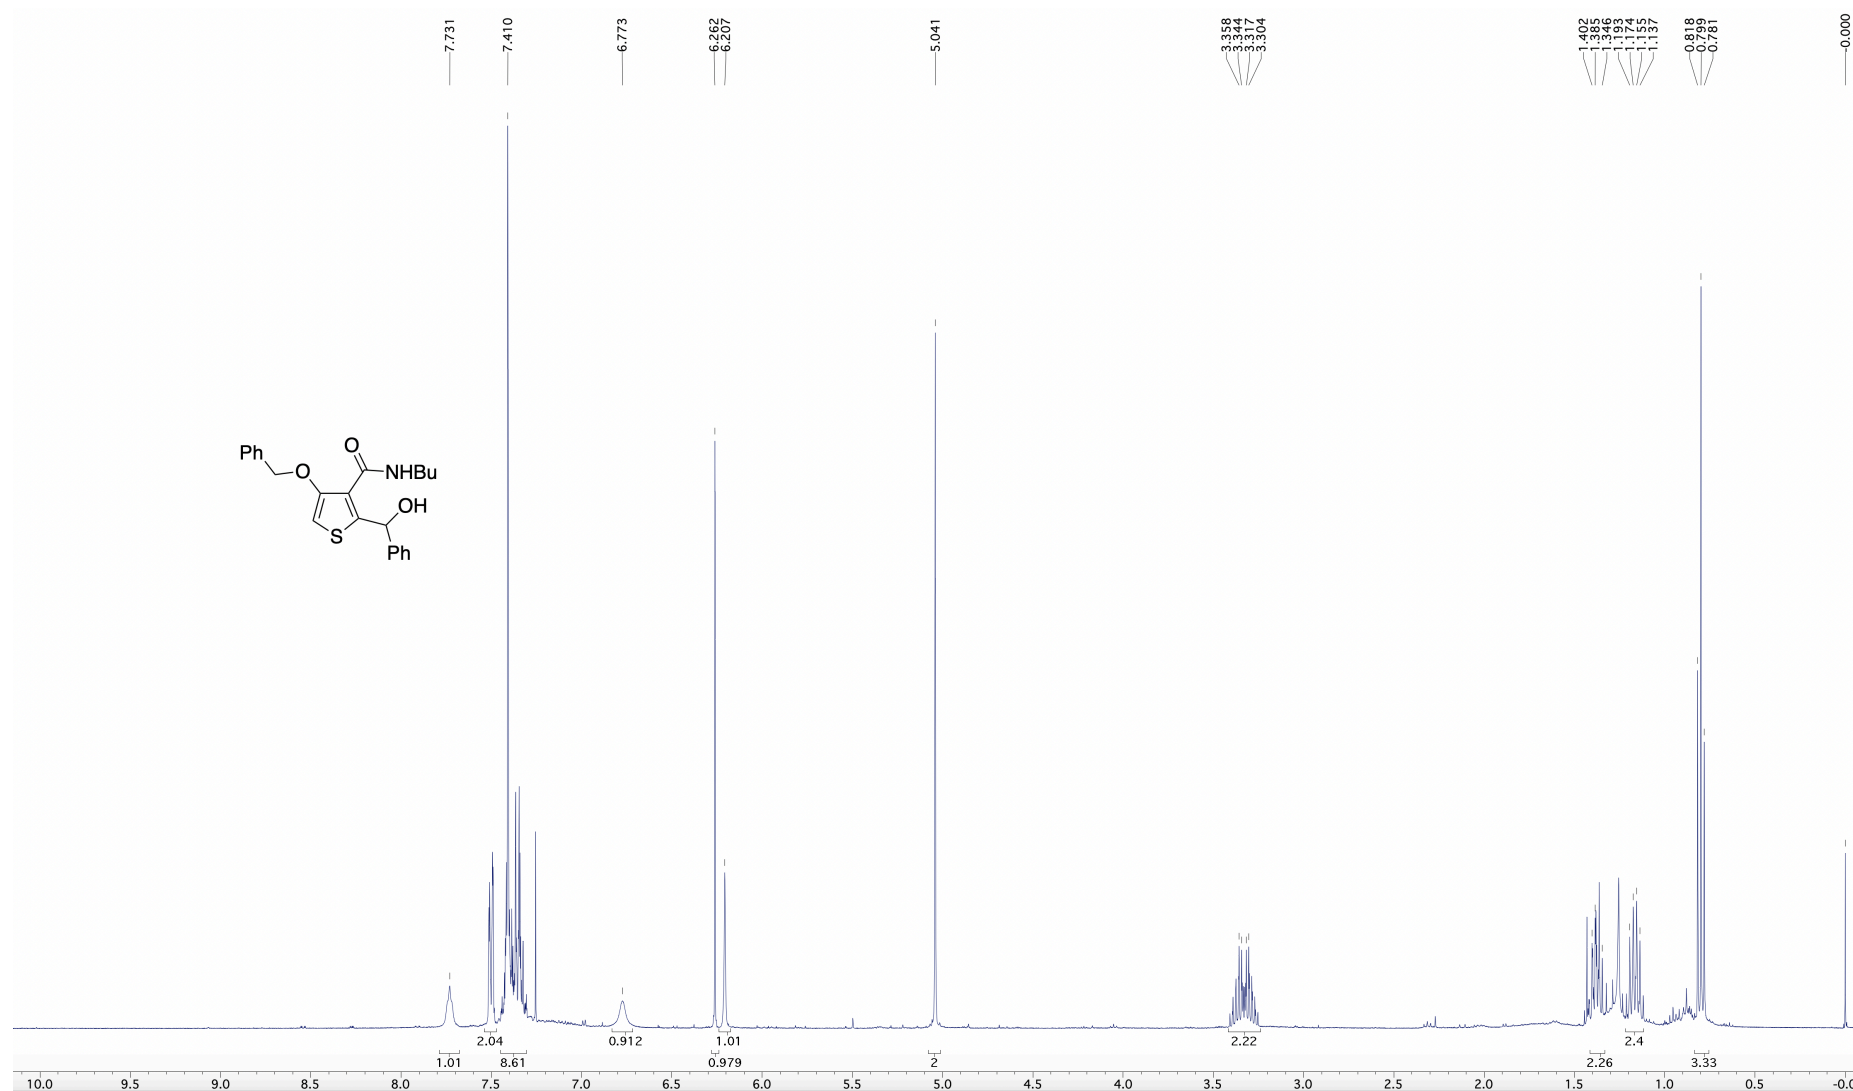

Figure S39. 100 MHz DEPTQ  $^{13}\text{C}$  NMR spectrum of **46**

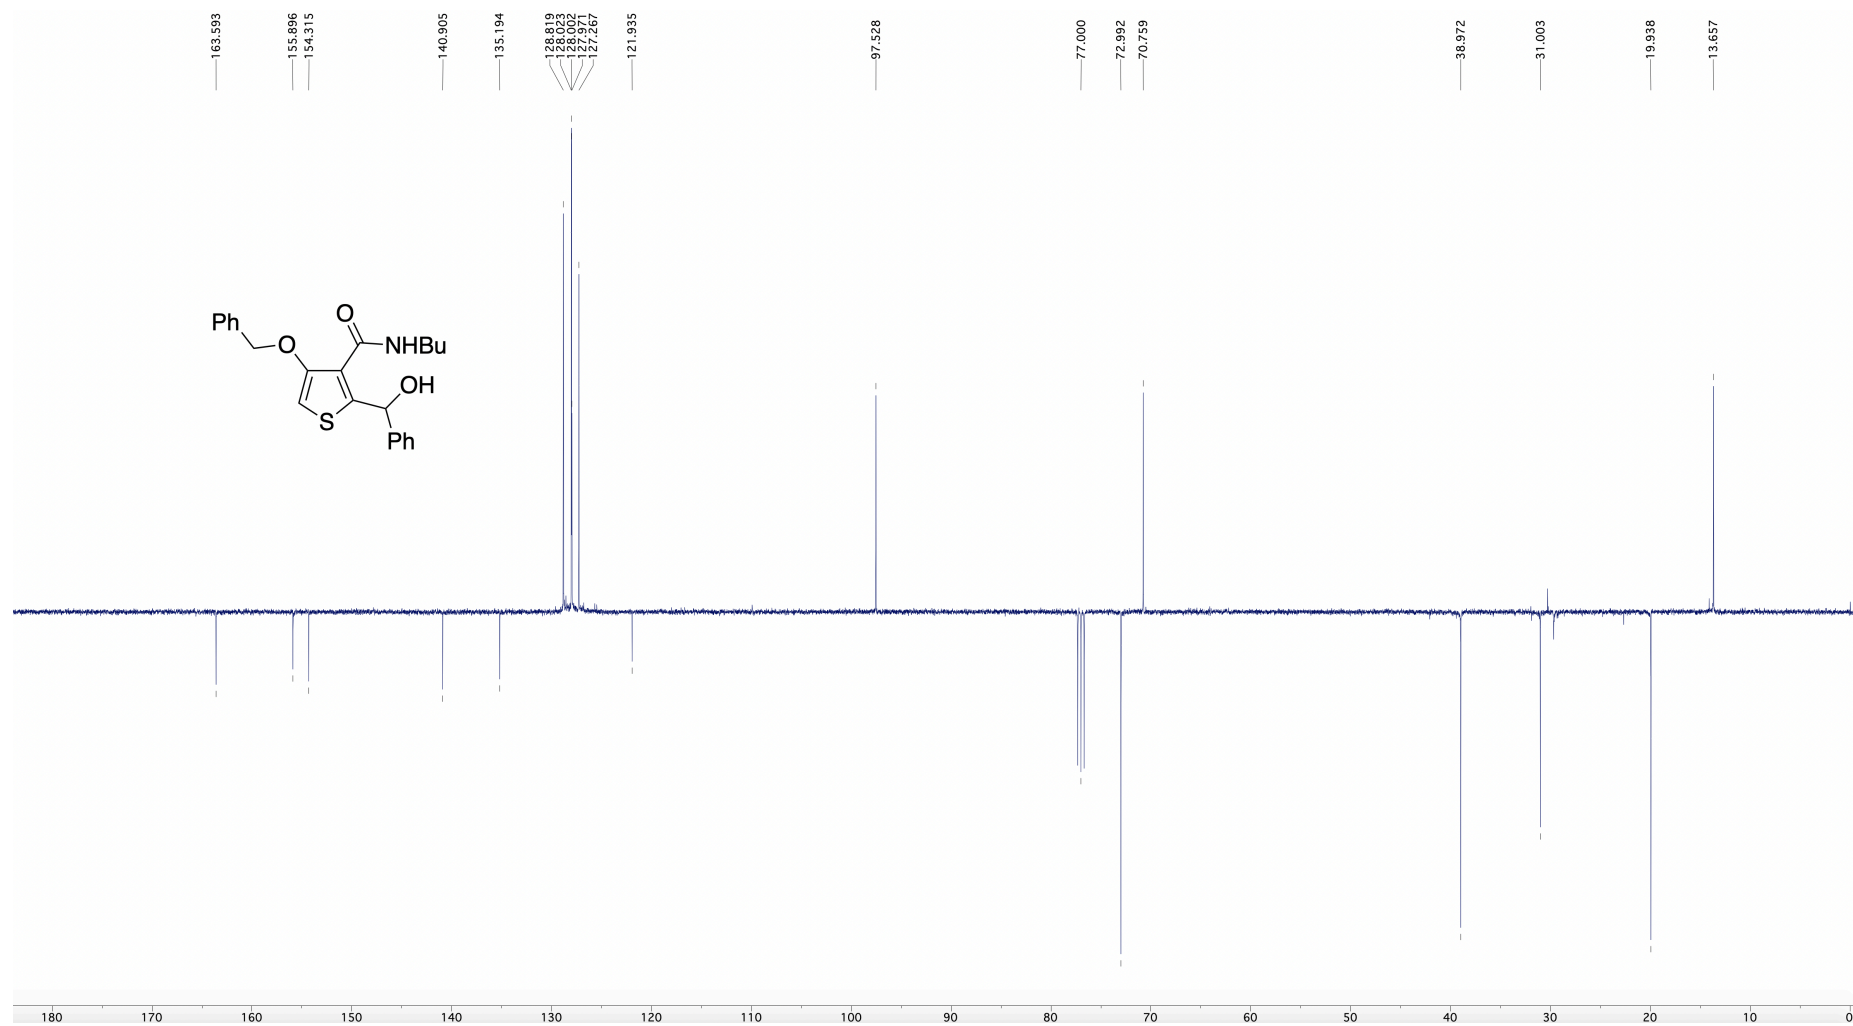

Figure 40. 500 MHz  $^1\text{H}$  NMR spectrum of **47**

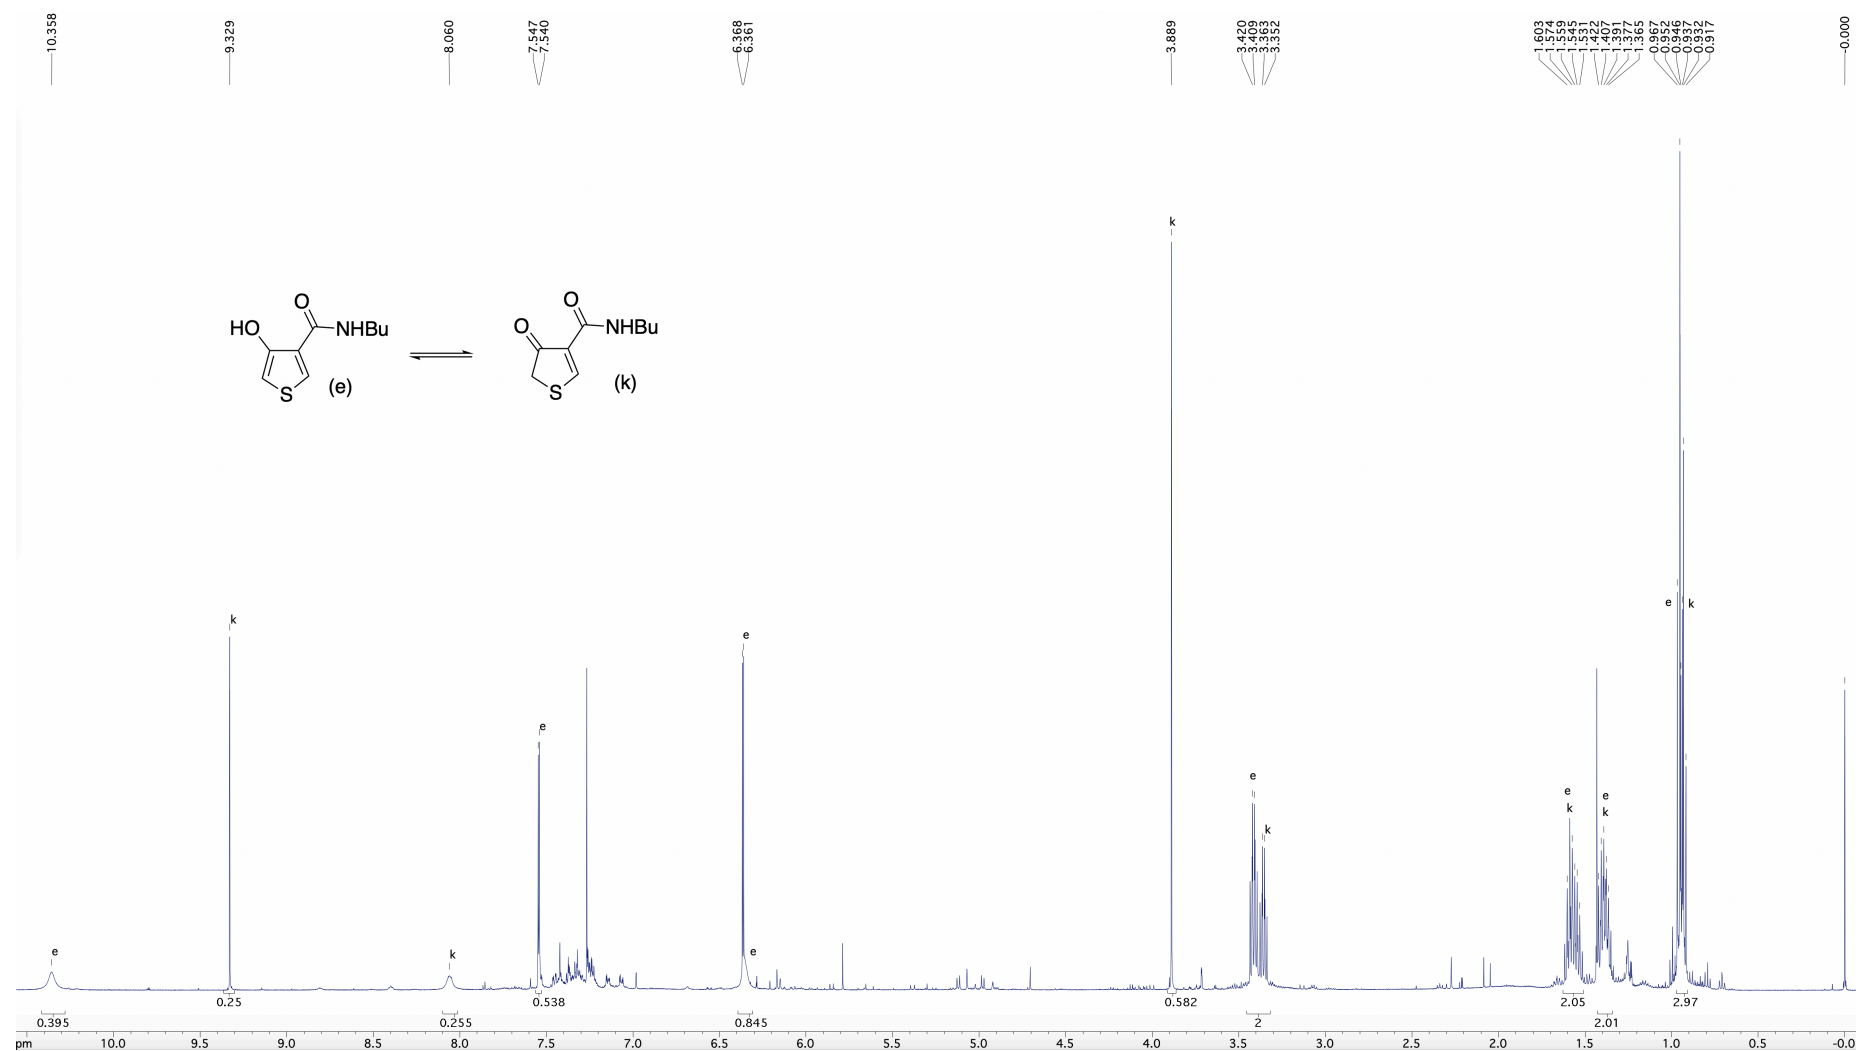

Figure S41. 125 MHz DEPTQ  $^{13}\text{C}$  NMR spectrum of **47**

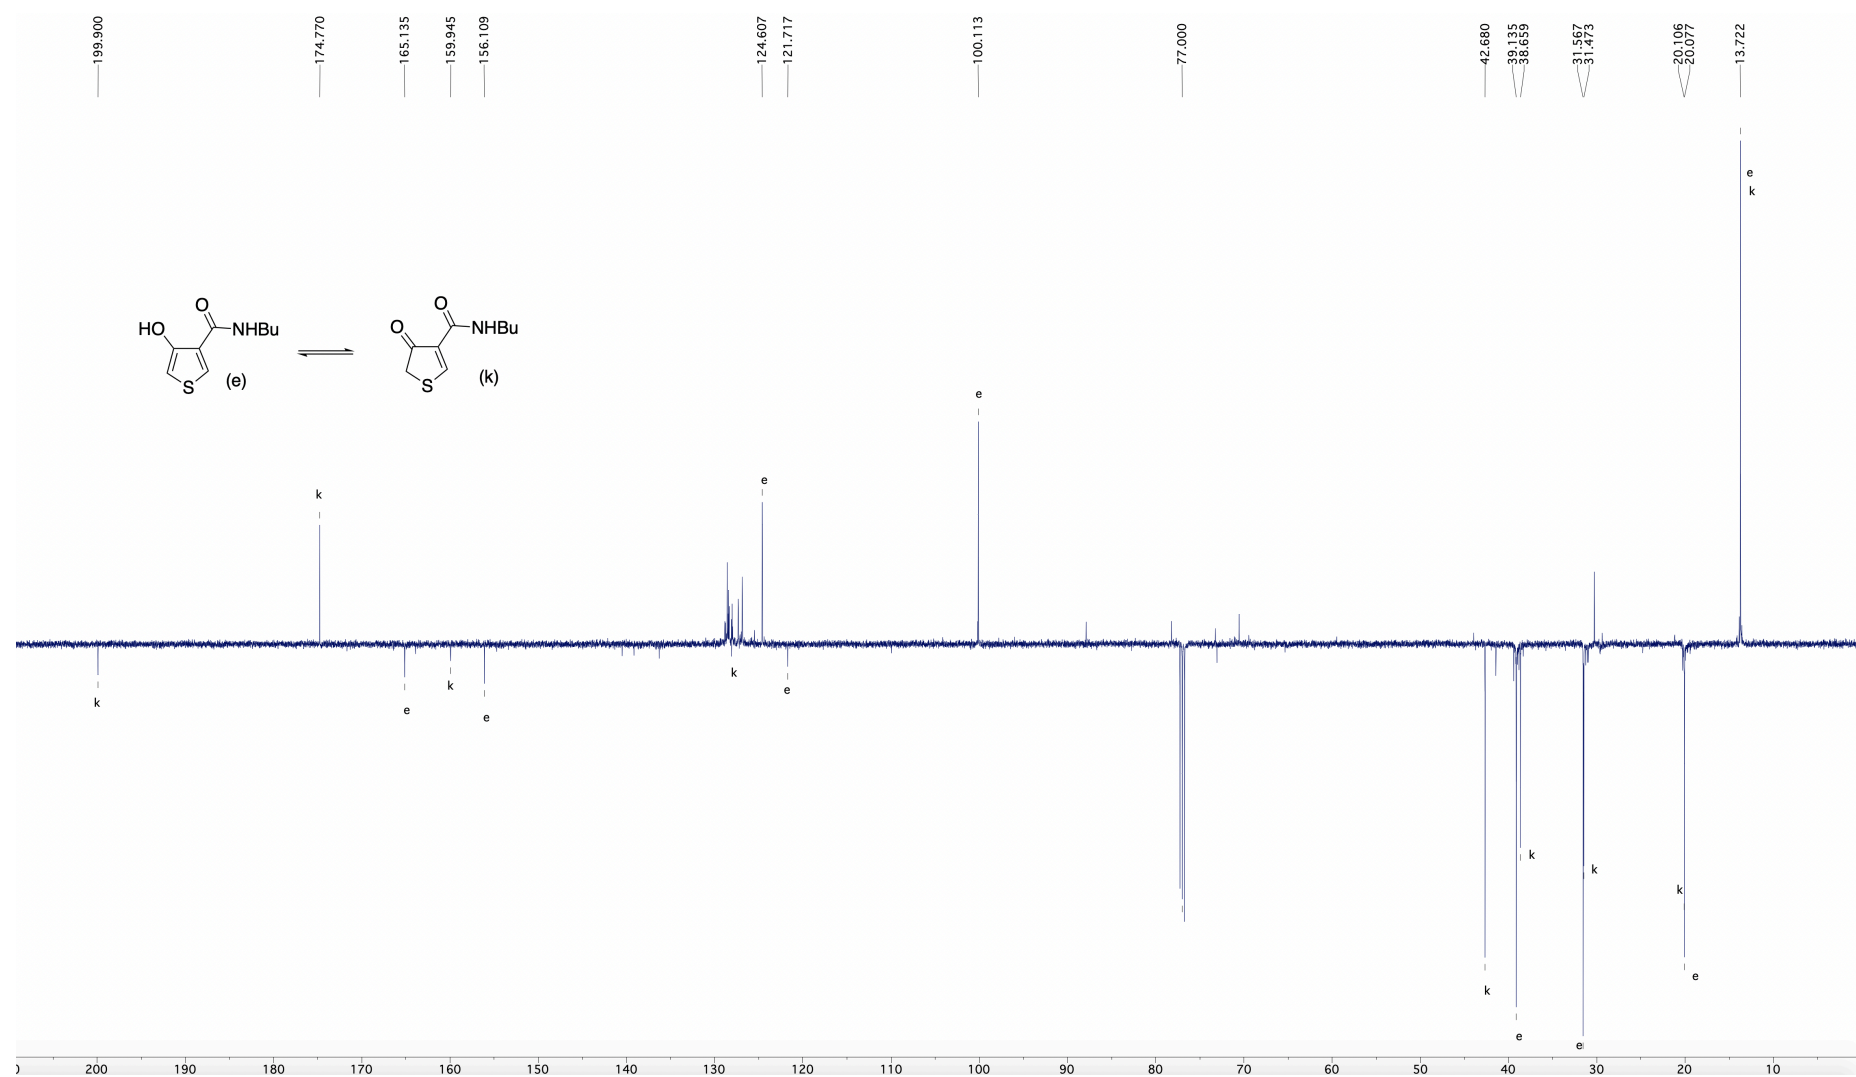

Supplement: s1 [file s1]
