# Supplementary material for: Rationalisation of Patterns of Competing Reactivity by X-ray Structure Determination: Reaction of Isomeric (Benzyloxythienyl)oxazolines with a Base
Source: Molecules. 2021 Dec 20;26(24):7690. doi: 10.3390/molecules26247690 (PMC8705950; doi:10.3390/molecules26247690)
Supplement: Supplementary file 1 [file molecules-26-07690-s001.zip]

Archive with 12 entries (11 files):
- 21Mol supp mater/
- 21Mol supp mater/21Molecules_AH_RAA_suppl rev.pdf
- 21Mol supp mater/checkcif 11.pdf
- 21Mol supp mater/checkcif 13.pdf
- 21Mol supp mater/checkcif 20.pdf
- 21Mol supp mater/checkcif 26.pdf
- 21Mol supp mater/checkcif 9.pdf
- 21Mol supp mater/cpd 11.cif
- 21Mol supp mater/cpd 13.cif
- 21Mol supp mater/cpd 20.cif
- 21Mol supp mater/cpd 26.cif
- 21Mol supp mater/cpd 9.cif
