# Supplementary material for: Rationalisation of Patterns of Competing Reactivity by X-ray Structure Determination: Reaction of Isomeric (Benzyloxythienyl)oxazolines with a Base
Source: Molecules. 2021 Dec 20;26(24):7690. doi: 10.3390/molecules26247690 (PMC8705950; doi:10.3390/molecules26247690)
Supplement: Supplementary file 1 [file molecules-26-07690-s001.zip › 21Mol supp mater/cpd 9.cif]

data_9
_audit_creation_date                               2017-06-12
_audit_creation_method                            'by CrystalStructure 4.2'

_publ_section_references
;
    ENTER OTHER REFERENCES

    Rigaku (2015). CrystalStructure. Version 4.2. 
    Rigaku Corporation, Tokyo, Japan.

    Sheldrick, G. M. (2014). Acta Cryst. (2014). A70, C1437.
    SHELXT Version 2014/4

    Sheldrick, G.M. (2008) SHELXL Version 2014/7, Acta Cryst. A64, 112-122.

    Rigaku Oxford Diffraction (2015), CrysAlisPro. version 1.171.38.41.
    Rigaku Corporation, Tokyo, Japan

;


_chemical_formula_sum                             'C16 H17 N O2 S'
_chemical_formula_moiety                          'C16 H17 N O2 S'
_chemical_formula_weight                           287.38
_chemical_melting_point                            ?

#==============================================================================
# CRYSTAL DATA
_space_group_crystal_system                        monoclinic
_space_group_name_H-M_alt                         'P 1 21/c 1'
_space_group_name_Hall                            '-P 2ybc'
_space_group_IT_number                             14
loop_
_space_group_symop_id
_space_group_symop_operation_xyz
1   '+X,+Y,+Z'
2   '-X,1/2+Y,1/2-Z'
3   '-X,-Y,-Z'
4   '+X,-1/2-Y,-1/2+Z'
#------------------------------------------------------------------------------
_cell_length_a                                     15.9970(19)
_cell_length_b                                     7.5839(6)
_cell_length_c                                     12.4523(15)
_cell_angle_alpha                                  90.0000
_cell_angle_beta                                   111.010(14)
_cell_angle_gamma                                  90.0000
_cell_volume                                       1410.3(3)
_cell_formula_units_Z                              4
_cell_measurement_reflns_used                      5153
_cell_measurement_theta_min                        2.71
_cell_measurement_theta_max                        29.57
_cell_measurement_temperature                      93
#------------------------------------------------------------------------------
_exptl_crystal_description                         plate
_exptl_crystal_colour                              colourless
_exptl_crystal_size_max                            0.100
_exptl_crystal_size_mid                            0.100
_exptl_crystal_size_min                            0.010
_exptl_crystal_density_diffrn                      1.353
_exptl_crystal_density_meas                        ?
_exptl_crystal_density_method                     'not measured'
_exptl_crystal_F_000                               608.00
_exptl_absorpt_coefficient_mu                      0.230
_exptl_absorpt_correction_type                     multi-scan
_exptl_absorpt_process_details
;
CrysAlisPro 1.171.38.41 (Rigaku Oxford Diffraction, 2015)
Empirical absorption correction using spherical harmonics,
 implemented in SCALE3 ABSPACK scaling algorithm.
;
_exptl_absorpt_correction_T_min                    0.811
_exptl_absorpt_correction_T_max                    0.998

#==============================================================================
# EXPERIMENTAL DATA

_diffrn_ambient_temperature                        93
_diffrn_radiation_type                            'Mo K\a'
_diffrn_radiation_wavelength                       0.71075
_diffrn_measurement_device_type                   'Rigaku XtaLAB P200'
_diffrn_measurement_method                         \w
_diffrn_detector_area_resol_mean                   5.811
_diffrn_reflns_number                              15716
_diffrn_reflns_av_R_equivalents                    0.0734
_diffrn_reflns_theta_max                           29.850
_diffrn_reflns_theta_min                           2.728
_diffrn_reflns_theta_full                          25.242
_diffrn_measured_fraction_theta_max                0.866
_diffrn_measured_fraction_theta_full               0.991
_diffrn_reflns_Laue_measured_fraction_max          0.866
_diffrn_reflns_Laue_measured_fraction_full         0.991
_diffrn_reflns_point_group_measured_fraction_max   0.866
_diffrn_reflns_point_group_measured_fraction_full  0.991
_diffrn_reflns_limit_h_min                        -21
_diffrn_reflns_limit_h_max                         20
_diffrn_reflns_limit_k_min                        -10
_diffrn_reflns_limit_k_max                         10
_diffrn_reflns_limit_l_min                        -16
_diffrn_reflns_limit_l_max                         16
_diffrn_standards_number                           0
_diffrn_standards_interval_count                   .
_diffrn_standards_decay_%                          ?
_reflns_number_total                               3523
_reflns_number_gt                                  2462
_reflns_threshold_expression                       F^2^>2.0\s(F^2^)
_reflns_Friedel_coverage          0.000
_reflns_Friedel_fraction_max      .
_reflns_Friedel_fraction_full     .

#==============================================================================
# REFINEMENT DATA

_refine_special_details
;
    Refinement was performed using all reflections. The weighted 
    R-factor (wR) and goodness of fit (S) are based on F^2^.
    R-factor (gt) are based on F. The threshold expression of
    F^2^ > 2.0 sigma(F^2^) is used only for calculating R-factor (gt).
;
_refine_ls_structure_factor_coef                   Fsqd
_refine_ls_R_factor_all                            0.0930
_refine_ls_R_factor_gt                             0.0584
_refine_ls_wR_factor_ref                           0.1555
_refine_ls_wR_factor_gt                            0.1406
_refine_ls_number_restraints                       0
_refine_ls_hydrogen_treatment                      constr
_refine_ls_number_reflns                           3523
_refine_ls_number_parameters                       181
_refine_ls_goodness_of_fit_ref                     1.048
_refine_ls_weighting_scheme                        calc
_refine_ls_weighting_details
           'w = 1/[\s^2^(Fo^2^)+(0.0699P)^2^+1.1160P] where P=(Fo^2^+2Fc^2^)/3'
_atom_sites_solution_hydrogens                     geom
_atom_sites_solution_primary                       direct
_atom_sites_solution_secondary                     difmap
_refine_ls_shift/su_max                            0.001
_refine_diff_density_max                           0.62
_refine_diff_density_min                          -0.40
_refine_ls_extinction_method                       none
_refine_ls_extinction_coef                         ?

loop_
_atom_type_symbol
_atom_type_description
_atom_type_scat_dispersion_real
_atom_type_scat_dispersion_imag
_atom_type_scat_source
  'C' 'C'  0.0033 0.0016 
;
International Tables for Crystallography
(Vol. C, Tables 4.2.6.8 and 6.1.1.4)
;
  'H' 'H'  0.0000 0.0000 
;
International Tables for Crystallography
(Vol. C, Table 6.1.1.4)
;
  'N' 'N'  0.0061 0.0033 
;
International Tables for Crystallography
(Vol. C, Tables 4.2.6.8 and 6.1.1.4)
;
  'O' 'O'  0.0106 0.0060 
;
International Tables for Crystallography
(Vol. C, Tables 4.2.6.8 and 6.1.1.4)
;
  'S' 'S'  0.1246 0.1234 
;
International Tables for Crystallography
(Vol. C, Tables 4.2.6.8 and 6.1.1.4)
;

#==============================================================================
# ATOMIC COORDINATES AND THERMAL PARAMETERS

loop_
 _atom_site_label
 _atom_site_type_symbol
 _atom_site_fract_x
 _atom_site_fract_y
 _atom_site_fract_z
 _atom_site_U_iso_or_equiv
 _atom_site_adp_type
 _atom_site_occupancy
 _atom_site_site_symmetry_order  
 _atom_site_calc_flag
 _atom_site_refinement_flags_posn
 _atom_site_refinement_flags_adp
 _atom_site_refinement_flags_occupancy
 _atom_site_disorder_assembly
 _atom_site_disorder_group
S7 S 0.17162(4) 0.72083(8) 0.51507(5) 0.01967(18) Uani 1 1 d . . . . .
O1 O 0.08171(11) 0.4670(2) 0.33917(15) 0.0205(4) Uani 1 1 d . . . . .
O11 O 0.32552(11) 0.7150(2) 0.33633(15) 0.0179(4) Uani 1 1 d . . . . .
N3 N 0.18672(14) 0.4291(3) 0.25761(18) 0.0195(5) Uani 1 1 d . . . . .
C2 C 0.16151(15) 0.5139(3) 0.3286(2) 0.0159(5) Uani 1 1 d . . . . .
C4 C 0.11964(16) 0.2871(3) 0.2081(2) 0.0182(5) Uani 1 1 d . . . . .
C5 C 0.04347(17) 0.3346(3) 0.2513(2) 0.0245(6) Uani 1 1 d . . . . .
H5A H -0.0088 0.3825 0.1880 0.029 Uiso 1 1 calc R U . . .
H5B H 0.0243 0.2298 0.2839 0.029 Uiso 1 1 calc R U . . .
C6 C 0.20796(15) 0.6543(3) 0.4063(2) 0.0163(5) Uani 1 1 d . . . . .
C8 C 0.25803(17) 0.8672(3) 0.5673(2) 0.0206(5) Uani 1 1 d . . . . .
H8 H 0.2667 0.9404 0.6324 0.025 Uiso 1 1 calc R U . . .
C9 C 0.31292(16) 0.8676(3) 0.5059(2) 0.0180(5) Uani 1 1 d . . . . .
H9 H 0.3645 0.9402 0.5230 0.022 Uiso 1 1 calc R U . . .
C10 C 0.28402(16) 0.7461(3) 0.4125(2) 0.0159(5) Uani 1 1 d . . . . .
C12 C 0.37915(15) 0.8546(3) 0.3146(2) 0.0173(5) Uani 1 1 d . . . . .
H12A H 0.3751 0.9612 0.3583 0.021 Uiso 1 1 calc R U . . .
H12B H 0.3556 0.8846 0.2317 0.021 Uiso 1 1 calc R U . . .
C13 C 0.47540(15) 0.7985(3) 0.3495(2) 0.0149(5) Uani 1 1 d . . . . .
C14 C 0.51884(17) 0.7154(3) 0.4550(2) 0.0166(5) Uani 1 1 d . . . . .
H14 H 0.4876 0.6950 0.5059 0.020 Uiso 1 1 calc R U . . .
C15 C 0.60762(16) 0.6623(3) 0.4861(2) 0.0194(5) Uani 1 1 d . . . . .
H15 H 0.6369 0.6054 0.5577 0.023 Uiso 1 1 calc R U . . .
C16 C 0.65315(17) 0.6928(3) 0.4120(2) 0.0203(5) Uani 1 1 d . . . . .
H16 H 0.7136 0.6557 0.4327 0.024 Uiso 1 1 calc R U . . .
C17 C 0.61089(17) 0.7776(3) 0.3074(2) 0.0203(5) Uani 1 1 d . . . . .
H17 H 0.6426 0.7999 0.2573 0.024 Uiso 1 1 calc R U . . .
C18 C 0.52195(17) 0.8296(3) 0.2766(2) 0.0179(5) Uani 1 1 d . . . . .
H18 H 0.4929 0.8869 0.2049 0.021 Uiso 1 1 calc R U . . .
C19 C 0.08866(18) 0.2892(4) 0.0774(2) 0.0259(6) Uani 1 1 d . . . . .
H19A H 0.0446 0.1953 0.0458 0.031 Uiso 1 1 calc R U . . .
H19B H 0.0613 0.4035 0.0485 0.031 Uiso 1 1 calc R U . . .
H19C H 0.1402 0.2700 0.0538 0.031 Uiso 1 1 calc R U . . .
C20 C 0.16266(18) 0.1109(3) 0.2555(2) 0.0251(6) Uani 1 1 d . . . . .
H20A H 0.1193 0.0159 0.2237 0.030 Uiso 1 1 calc R U . . .
H20B H 0.2151 0.0922 0.2338 0.030 Uiso 1 1 calc R U . . .
H20C H 0.1813 0.1113 0.3396 0.030 Uiso 1 1 calc R U . . .

loop_
 _atom_site_aniso_label
 _atom_site_aniso_U_11
 _atom_site_aniso_U_22
 _atom_site_aniso_U_33
 _atom_site_aniso_U_23
 _atom_site_aniso_U_13
 _atom_site_aniso_U_12
S7 0.0253(3) 0.0176(3) 0.0186(3) -0.0006(2) 0.0111(3) -0.0002(2)
O1 0.0203(9) 0.0196(8) 0.0245(10) -0.0060(7) 0.0115(8) -0.0038(7)
O11 0.0236(9) 0.0144(8) 0.0204(9) -0.0020(7) 0.0135(7) -0.0046(7)
N3 0.0227(10) 0.0153(10) 0.0217(11) -0.0036(8) 0.0093(9) -0.0016(8)
C2 0.0176(11) 0.0136(10) 0.0173(12) 0.0040(9) 0.0073(10) 0.0008(8)
C4 0.0183(11) 0.0150(11) 0.0221(13) -0.0019(9) 0.0082(10) -0.0018(9)
C5 0.0223(13) 0.0205(12) 0.0329(15) -0.0113(11) 0.0124(12) -0.0066(10)
C6 0.0194(11) 0.0123(10) 0.0178(12) 0.0020(9) 0.0073(10) 0.0017(8)
C8 0.0284(13) 0.0160(11) 0.0170(12) -0.0005(9) 0.0076(11) 0.0012(10)
C9 0.0229(12) 0.0132(11) 0.0167(12) -0.0009(9) 0.0057(10) -0.0008(9)
C10 0.0221(12) 0.0130(11) 0.0135(12) 0.0021(8) 0.0074(10) 0.0024(8)
C12 0.0222(12) 0.0138(11) 0.0185(12) 0.0033(9) 0.0103(10) -0.0016(9)
C13 0.0203(11) 0.0098(10) 0.0151(12) -0.0027(8) 0.0068(9) -0.0034(8)
C14 0.0273(12) 0.0128(10) 0.0126(11) 0.0005(9) 0.0106(10) -0.0029(9)
C15 0.0254(13) 0.0143(10) 0.0178(12) 0.0008(9) 0.0067(10) 0.0009(9)
C16 0.0229(12) 0.0150(11) 0.0238(14) -0.0031(10) 0.0093(11) -0.0001(9)
C17 0.0279(13) 0.0139(11) 0.0221(13) -0.0028(9) 0.0125(11) -0.0017(10)
C18 0.0278(13) 0.0137(10) 0.0139(12) 0.0002(9) 0.0095(10) -0.0011(9)
C19 0.0262(13) 0.0266(13) 0.0235(14) -0.0030(11) 0.0069(11) 0.0003(11)
C20 0.0303(14) 0.0184(12) 0.0300(15) 0.0015(10) 0.0149(12) 0.0022(10)

#==============================================================================
_computing_data_collection
                                    'CrysAlisPro 1.171.38.41 (Rigaku OD, 2015)'
_computing_cell_refinement
                                    'CrysAlisPro 1.171.38.41 (Rigaku OD, 2015)'
_computing_data_reduction
                                    'CrysAlisPro 1.171.38.41 (Rigaku OD, 2015)'
_computing_structure_solution
                                      'SHELXT Version 2014/4 (Sheldrick, 2014)'
_computing_structure_refinement
                                      'SHELXL Version 2014/7 (Sheldrick, 2008)'
_computing_publication_material
                                          'CrystalStructure 4.2 (Rigaku, 2015)'
_computing_molecular_graphics                     'CrystalStructure 4.2'

#==============================================================================
# MOLECULAR GEOMETRY

_geom_special_details
;
 All esds (except the esd in the dihedral angle between two l.s. planes)
 are estimated using the full covariance matrix.  The cell esds are taken
 into account individually in the estimation of esds in distances, angles
 and torsion angles; correlations between esds in cell parameters are only
 used when they are defined by crystal symmetry.  An approximate (isotropic)
 treatment of cell esds is used for estimating esds involving l.s. planes.
;

loop_
 _geom_bond_atom_site_label_1
 _geom_bond_atom_site_label_2
 _geom_bond_distance
 _geom_bond_site_symmetry_2
 _geom_bond_publ_flag
S7 C8 1.709(3) . ?
S7 C6 1.730(3) . ?
O1 C2 1.376(3) . ?
O1 C5 1.448(3) . ?
O11 C10 1.360(3) . ?
O11 C12 1.448(3) . ?
N3 C2 1.270(3) . ?
N3 C4 1.489(3) . ?
C2 C6 1.451(3) . ?
C4 C20 1.522(3) . ?
C4 C19 1.522(4) . ?
C4 C5 1.541(3) . ?
C5 H5A 0.9900 . ?
C5 H5B 0.9900 . ?
C6 C10 1.380(3) . ?
C8 C9 1.356(4) . ?
C8 H8 0.9500 . ?
C9 C10 1.424(3) . ?
C9 H9 0.9500 . ?
C12 C13 1.503(3) . ?
C12 H12A 0.9900 . ?
C12 H12B 0.9900 . ?
C13 C18 1.386(3) . ?
C13 C14 1.397(3) . ?
C14 C15 1.391(3) . ?
C14 H14 0.9500 . ?
C15 C16 1.384(4) . ?
C15 H15 0.9500 . ?
C16 C17 1.391(4) . ?
C16 H16 0.9500 . ?
C17 C18 1.391(3) . ?
C17 H17 0.9500 . ?
C18 H18 0.9500 . ?
C19 H19A 0.9800 . ?
C19 H19B 0.9800 . ?
C19 H19C 0.9800 . ?
C20 H20A 0.9800 . ?
C20 H20B 0.9800 . ?
C20 H20C 0.9800 . ?

loop_
 _geom_angle_atom_site_label_1
 _geom_angle_atom_site_label_2
 _geom_angle_atom_site_label_3
 _geom_angle
 _geom_angle_site_symmetry_1
 _geom_angle_site_symmetry_3
 _geom_angle_publ_flag
C8 S7 C6 91.99(12) . . ?
C2 O1 C5 105.20(18) . . ?
C10 O11 C12 118.33(18) . . ?
C2 N3 C4 107.0(2) . . ?
N3 C2 O1 118.2(2) . . ?
N3 C2 C6 128.4(2) . . ?
O1 C2 C6 113.4(2) . . ?
N3 C4 C20 108.40(19) . . ?
N3 C4 C19 110.2(2) . . ?
C20 C4 C19 110.6(2) . . ?
N3 C4 C5 103.25(19) . . ?
C20 C4 C5 112.0(2) . . ?
C19 C4 C5 112.1(2) . . ?
O1 C5 C4 104.66(18) . . ?
O1 C5 H5A 110.8 . . ?
C4 C5 H5A 110.8 . . ?
O1 C5 H5B 110.8 . . ?
C4 C5 H5B 110.8 . . ?
H5A C5 H5B 108.9 . . ?
C10 C6 C2 129.7(2) . . ?
C10 C6 S7 110.24(18) . . ?
C2 C6 S7 120.04(18) . . ?
C9 C8 S7 112.66(19) . . ?
C9 C8 H8 123.7 . . ?
S7 C8 H8 123.7 . . ?
C8 C9 C10 111.9(2) . . ?
C8 C9 H9 124.1 . . ?
C10 C9 H9 124.1 . . ?
O11 C10 C6 121.0(2) . . ?
O11 C10 C9 125.8(2) . . ?
C6 C10 C9 113.2(2) . . ?
O11 C12 C13 110.67(18) . . ?
O11 C12 H12A 109.5 . . ?
C13 C12 H12A 109.5 . . ?
O11 C12 H12B 109.5 . . ?
C13 C12 H12B 109.5 . . ?
H12A C12 H12B 108.1 . . ?
C18 C13 C14 119.4(2) . . ?
C18 C13 C12 119.8(2) . . ?
C14 C13 C12 120.8(2) . . ?
C15 C14 C13 120.4(2) . . ?
C15 C14 H14 119.8 . . ?
C13 C14 H14 119.8 . . ?
C16 C15 C14 119.7(2) . . ?
C16 C15 H15 120.2 . . ?
C14 C15 H15 120.2 . . ?
C15 C16 C17 120.4(2) . . ?
C15 C16 H16 119.8 . . ?
C17 C16 H16 119.8 . . ?
C18 C17 C16 119.7(2) . . ?
C18 C17 H17 120.2 . . ?
C16 C17 H17 120.2 . . ?
C13 C18 C17 120.5(2) . . ?
C13 C18 H18 119.8 . . ?
C17 C18 H18 119.8 . . ?
C4 C19 H19A 109.5 . . ?
C4 C19 H19B 109.5 . . ?
H19A C19 H19B 109.5 . . ?
C4 C19 H19C 109.5 . . ?
H19A C19 H19C 109.5 . . ?
H19B C19 H19C 109.5 . . ?
C4 C20 H20A 109.5 . . ?
C4 C20 H20B 109.5 . . ?
H20A C20 H20B 109.5 . . ?
C4 C20 H20C 109.5 . . ?
H20A C20 H20C 109.5 . . ?
H20B C20 H20C 109.5 . . ?

loop_
 _geom_torsion_atom_site_label_1
 _geom_torsion_atom_site_label_2
 _geom_torsion_atom_site_label_3
 _geom_torsion_atom_site_label_4
 _geom_torsion
 _geom_torsion_site_symmetry_1
 _geom_torsion_site_symmetry_2
 _geom_torsion_site_symmetry_3
 _geom_torsion_site_symmetry_4
 _geom_torsion_publ_flag
C4 N3 C2 O1 -3.3(3) . . . . ?
C4 N3 C2 C6 174.1(2) . . . . ?
C5 O1 C2 N3 -5.5(3) . . . . ?
C5 O1 C2 C6 176.7(2) . . . . ?
C2 N3 C4 C20 -108.9(2) . . . . ?
C2 N3 C4 C19 129.9(2) . . . . ?
C2 N3 C4 C5 10.0(3) . . . . ?
C2 O1 C5 C4 11.2(2) . . . . ?
N3 C4 C5 O1 -12.8(2) . . . . ?
C20 C4 C5 O1 103.6(2) . . . . ?
C19 C4 C5 O1 -131.4(2) . . . . ?
N3 C2 C6 C10 9.5(4) . . . . ?
O1 C2 C6 C10 -173.0(2) . . . . ?
N3 C2 C6 S7 -167.2(2) . . . . ?
O1 C2 C6 S7 10.4(3) . . . . ?
C8 S7 C6 C10 -0.46(19) . . . . ?
C8 S7 C6 C2 176.79(19) . . . . ?
C6 S7 C8 C9 0.0(2) . . . . ?
S7 C8 C9 C10 0.4(3) . . . . ?
C12 O11 C10 C6 155.0(2) . . . . ?
C12 O11 C10 C9 -26.6(3) . . . . ?
C2 C6 C10 O11 2.4(4) . . . . ?
S7 C6 C10 O11 179.35(16) . . . . ?
C2 C6 C10 C9 -176.1(2) . . . . ?
S7 C6 C10 C9 0.8(3) . . . . ?
C8 C9 C10 O11 -179.3(2) . . . . ?
C8 C9 C10 C6 -0.8(3) . . . . ?
C10 O11 C12 C13 117.9(2) . . . . ?
O11 C12 C13 C18 134.2(2) . . . . ?
O11 C12 C13 C14 -46.0(3) . . . . ?
C18 C13 C14 C15 -0.8(3) . . . . ?
C12 C13 C14 C15 179.3(2) . . . . ?
C13 C14 C15 C16 0.2(3) . . . . ?
C14 C15 C16 C17 0.6(4) . . . . ?
C15 C16 C17 C18 -0.9(4) . . . . ?
C14 C13 C18 C17 0.5(3) . . . . ?
C12 C13 C18 C17 -179.6(2) . . . . ?
C16 C17 C18 C13 0.4(4) . . . . ?

#==============================================================================

#==============================================================================
# Additional structures and associated data_? identifiers
# should be added at this point if there is more than one 
# structure analysis in the CIF.

_shelx_res_file
;

    shelxl.res created by SHELXL-2014/7

TITL AHAA21N
CELL  0.71075 15.99700 7.58390 12.45230 90.00000 111.01000 90.00000
ZERR  4 0.00190 0.00060 0.00150 0.00000 0.01400 0.00000
LATT 1
SYMM    -X, .50+Y, .50-Z
SFAC C H N O S
UNIT 64 68 4 8 4
OMIT   -13   2  12
L.S. 20
FMAP 2
PLAN 5
WPDB -2
HTAB
BOND $H
CONF
LIST 4
TEMP -180.0
ACTA
SIZE 0.100 0.100 0.010
WGHT    0.069900    1.116000
FVAR       0.55424
S7    5    0.171618    0.720828    0.515073    11.00000    0.02533    0.01764 =
         0.01864   -0.00055    0.01106   -0.00021
O1    4    0.081712    0.466961    0.339173    11.00000    0.02030    0.01963 =
         0.02447   -0.00598    0.01146   -0.00379
O11   4    0.325524    0.715033    0.336328    11.00000    0.02363    0.01435 =
         0.02036   -0.00195    0.01355   -0.00460
N3    3    0.186719    0.429088    0.257614    11.00000    0.02266    0.01533 =
         0.02168   -0.00359    0.00932   -0.00159
C2    1    0.161511    0.513881    0.328626    11.00000    0.01758    0.01356 =
         0.01731    0.00398    0.00733    0.00083
C4    1    0.119636    0.287122    0.208113    11.00000    0.01828    0.01501 =
         0.02211   -0.00186    0.00822   -0.00181
C5    1    0.043468    0.334646    0.251321    11.00000    0.02226    0.02049 =
         0.03293   -0.01126    0.01240   -0.00658
AFIX  23
H5A   2   -0.008816    0.382457    0.187978    11.00000   -1.20000
H5B   2    0.024305    0.229834    0.283941    11.00000   -1.20000
AFIX   0
C6    1    0.207962    0.654265    0.406319    11.00000    0.01937    0.01226 =
         0.01779    0.00196    0.00726    0.00168
C8    1    0.258025    0.867237    0.567325    11.00000    0.02842    0.01602 =
         0.01698   -0.00048    0.00755    0.00125
AFIX  43
H8    2    0.266652    0.940406    0.632351    11.00000   -1.20000
AFIX   0
C9    1    0.312922    0.867583    0.505857    11.00000    0.02290    0.01320 =
         0.01665   -0.00093    0.00570   -0.00077
AFIX  43
H9    2    0.364475    0.940170    0.522994    11.00000   -1.20000
AFIX   0
C10   1    0.284017    0.746075    0.412537    11.00000    0.02207    0.01296 =
         0.01346    0.00209    0.00735    0.00236
C12   1    0.379150    0.854575    0.314551    11.00000    0.02219    0.01378 =
         0.01849    0.00327    0.01031   -0.00162
AFIX  23
H12A  2    0.375091    0.961215    0.358277    11.00000   -1.20000
H12B  2    0.355633    0.884571    0.231667    11.00000   -1.20000
AFIX   0
C13   1    0.475401    0.798494    0.349540    11.00000    0.02034    0.00977 =
         0.01505   -0.00266    0.00682   -0.00339
C14   1    0.518845    0.715392    0.455023    11.00000    0.02730    0.01278 =
         0.01258    0.00055    0.01059   -0.00286
AFIX  43
H14   2    0.487568    0.694982    0.505878    11.00000   -1.20000
AFIX   0
C15   1    0.607620    0.662342    0.486055    11.00000    0.02538    0.01425 =
         0.01781    0.00080    0.00666    0.00091
AFIX  43
H15   2    0.636870    0.605440    0.557741    11.00000   -1.20000
AFIX   0
C16   1    0.653145    0.692833    0.412019    11.00000    0.02294    0.01501 =
         0.02375   -0.00308    0.00932   -0.00006
AFIX  43
H16   2    0.713602    0.655651    0.432740    11.00000   -1.20000
AFIX   0
C17   1    0.610889    0.777619    0.307427    11.00000    0.02789    0.01386 =
         0.02209   -0.00278    0.01249   -0.00166
AFIX  43
H17   2    0.642617    0.799891    0.257322    11.00000   -1.20000
AFIX   0
C18   1    0.521951    0.829636    0.276553    11.00000    0.02780    0.01366 =
         0.01391    0.00020    0.00953   -0.00106
AFIX  43
H18   2    0.492913    0.886904    0.204944    11.00000   -1.20000
AFIX   0
C19   1    0.088662    0.289177    0.077410    11.00000    0.02616    0.02660 =
         0.02347   -0.00299    0.00694    0.00031
AFIX  33
H19A  2    0.044571    0.195276    0.045818    11.00000   -1.20000
H19B  2    0.061310    0.403539    0.048487    11.00000   -1.20000
H19C  2    0.140161    0.270037    0.053764    11.00000   -1.20000
AFIX   0
C20   1    0.162664    0.110942    0.255521    11.00000    0.03035    0.01838 =
         0.03000    0.00155    0.01492    0.00215
AFIX  33
H20A  2    0.119332    0.015857    0.223744    11.00000   -1.20000
H20B  2    0.215117    0.092174    0.233787    11.00000   -1.20000
H20C  2    0.181250    0.111345    0.339559    11.00000   -1.20000
AFIX   0
HKLF 4

REM  AHAA21N
REM R1 =  0.0584 for    2462 Fo > 4sig(Fo)  and  0.0930 for all    3523 data
REM    181 parameters refined using      0 restraints

END

WGHT      0.0674      1.1659

REM Instructions for potential hydrogen bonds
EQIV $1 x, -y+3/2, z+1/2
HTAB C8 O11_$1
HTAB C8 N3_$1

REM Highest difference peak  0.621,  deepest hole -0.402,  1-sigma level  0.084
Q1    1   0.2312  0.7254  0.5476  11.00000  0.05    0.62
Q2    1   0.1105  0.7228  0.4864  11.00000  0.05    0.54
Q3    1   0.2595  0.6615  0.4246  11.00000  0.05    0.44
Q4    1   0.4314  0.8191  0.3301  11.00000  0.05    0.43
Q5    1   0.5698  0.8122  0.2990  11.00000  0.05    0.43
;

_shelx_res_checksum   40122

_shelx_hkl_file
;
   0   0  -1    0.66    0.96
   0   0   1   -1.61    0.69
   0   0  -1    1.21    0.87
   0   0   1   -1.14    0.63
  -1   0  -1    1.09    1.45
   1   0   1    3.01    2.03
  -1   0  -1   -1.98    2.12
   1   0   1    0.64    1.37
  -1   0  -1    0.10    1.34
   1   0   1   -0.71    1.87
   2   0  -1    1.24    1.30
   2   0  -1    2.13    2.44
   0   1   0    0.34    2.69
   0  -1   0    1.42    1.36
   0   1   0    0.89    0.77
   0   1   0    0.02    0.97
   0  -1   0   -3.25    2.35
   0   1   0   -0.43    1.88
   2   0   0  759.85   58.67
   2   0   0  737.59   58.51
  -2   0   0  690.19   58.64
  -2   0   0  759.30   58.50
   2   0   0  790.25   58.66
  -2   0   0  781.08   58.68
   1   1   0  921.47   67.01
  -1   1   0  901.95   66.91
   1  -1   0  807.15   66.87
  -1   1   0  819.08   67.12
   1  -1   0  814.54   66.94
   1  -1   0  832.00   67.12
  -1   1   0  848.33   66.97
   1   1   0  854.41   66.95
  -1  -1   0  939.79   66.97
   1   1   0  856.38   66.96
   0  -1  -1  173.56   13.90
   0   1   1  173.94   14.27
   0   1  -1  203.03   13.90
   0   1  -1  165.28   14.13
   0   1  -1  168.09   13.85
   0  -1  -1  169.14   14.07
   0  -1  -1  161.06   14.12
   0   1   1  160.44   13.95
   0   1   1  169.37   14.10
   0  -1   1  187.64   13.85
   1  -1  -1  234.38   20.36
   1  -1  -1  253.87   20.47
  -1   1   1  223.12   20.45
   1   1  -1  301.24   20.25
  -1   1   1  229.76   20.50
   1   1  -1  255.04   20.21
   1   0  -2 1133.50   96.43
   1   0  -2 1281.48   96.34
   1   0  -2 1259.36   96.53
   0   0  -2   69.74    5.93
   0   0  -2   70.87    5.97
   0   0   2   73.34    5.83
   0   0  -2   67.11    6.11
   0   0   2   65.16    6.02
   2   0  -2 1240.13  100.81
   2   0  -2 1358.50  100.85
   1   1   1 1150.59   89.42
   1   1   1 1122.78   89.38
   1   1   1 1086.10   89.30
  -1  -1  -1 1233.01   89.35
   1  -1   1 1150.42   89.48
  -1   1  -1 1171.76   89.23
  -1  -1  -1 1023.61   89.37
   1  -1   1 1141.22   89.22
  -1  -1  -1 1012.16   89.30
  -1   1  -1 1235.84   89.25
   1  -1   1 1122.00   89.23
  -1   1  -1 1349.51   89.55
   2   0   1    2.01    3.76
   2   0   1    0.65    1.64
  -2   0  -1    0.55    1.96
  -2   0  -1    4.56    3.63
  -2   0  -1   -0.62    2.33
   2   0   1   -0.05    3.14
   2   1  -1  781.22   60.48
  -2   1   1  735.85   60.79
   2  -1  -1  828.17   60.92
   2  -1  -1  784.01   60.37
  -2   1   1  769.38   60.61
   2  -1  -1  787.96   60.59
  -2  -1   1  750.99   60.43
   2  -1   0  154.52   13.60
  -2   1   0  164.08   14.17
   2   1   0  186.96   14.15
   2   1   0  218.05   13.70
   2  -1   0  171.30   14.39
  -2   1   0  151.52   13.61
  -2   1   0  185.10   13.80
   2  -1   0  157.57   13.68
  -2  -1   0  191.26   13.92
   3   0  -1    1.53    3.30
   3   0  -1   -0.82    1.48
   3   0  -1   -0.27    3.31
  -3   0   0 1114.37   92.79
   3   0   0 1169.51   92.54
   3   0   0 1208.10   92.79
   3   0   0 1284.25   92.79
  -1   0  -2    0.53    2.46
   1   0   2    1.53    2.06
   1   0   2   -1.06    2.79
   1   0   2    3.38    3.14
  -1   0  -2   -2.70    2.47
  -1   0  -2    2.19    3.55
   1   1  -2  317.24   22.55
   1   1  -2  302.94   22.57
   1   1  -2  257.05   22.60
  -1   1   2  324.32   23.07
   1  -1  -2  285.06   22.82
   1  -1  -2  277.08   22.92
  -1   1   2  305.65   22.92
   1  -1  -2  255.95   22.56
   3   0  -2  191.51   15.28
   0  -1  -2 5472.37  425.35
   0   1  -2 5640.23  425.19
   0  -1  -2 5195.57  425.27
   0   1   2 5638.11  425.34
   0  -1   2 5194.02  425.18
   0   1  -2 5309.53  425.27
   0   1  -2 5694.36  425.21
   0  -1  -2 5687.04  425.43
   0   1   2 5491.87  425.44
   2   1  -2 3546.07  279.97
  -2   1   2 3664.16  280.19
   2  -1  -2 3538.29  280.14
   2   1  -2 3495.07  279.96
  -2   1   2 3594.65  280.16
   2  -1  -2 3634.55  280.22
  -2   1   2 3694.42  279.93
   2  -1   1 1030.91   83.76
  -2  -1  -1 1144.69   84.01
   2  -1   1 1028.38   84.10
  -2   1  -1 1069.75   83.76
   2   1   1 1078.06   83.83
   2  -1   1 1085.29   83.78
  -2   1  -1 1036.21   84.04
   2   1   1 1126.33   84.10
  -2   1  -1 1092.86   83.82
  -3   1   1  447.18   34.22
   3  -1  -1  451.11   34.13
   3  -1  -1  421.74   33.95
  -3   1   1  438.25   34.55
   3   1  -1  435.15   34.23
   3  -1  -1  426.76   34.63
  -3  -1   0 4947.62  395.47
   3   1   0 5082.21  395.71
  -3  -1   0 5342.55  395.66
   3  -1   0 5075.04  395.50
   3  -1   0 5077.26  395.81
  -3   1   0 5208.86  395.52
   3   1   0 5097.33  395.48
  -3  -1   0 5040.74  395.43
   3   1   0 5120.51  395.44
   3  -1   0 5065.30  395.49
  -3   1   0 4859.57  395.75
   1   0  -3   -0.74    2.60
  -1   0   3   -4.15    1.89
   1   0  -3   -1.82    2.50
   1   0  -3   -1.33    3.73
   1   0  -3   -1.59    3.04
   1  -1   2 5858.85  458.32
  -1   1  -2 5774.55  458.46
  -1   1  -2 5859.06  458.31
  -1   1  -2 5946.29  458.35
  -1  -1  -2 6014.19  458.44
   1   1   2 5834.58  458.42
  -1  -1  -2 5965.75  458.57
   1   1   2 5808.42  458.60
  -1  -1  -2 5949.55  458.47
  -2   0   3   -0.35    1.05
   2   0  -3   -2.44    1.27
   2   0  -3   -0.66    3.00
   2   0  -3   -1.31    2.93
  -3   0  -1    3.04    4.62
  -3   0  -1    2.66    2.42
  -3   0  -1   -1.96    3.11
   3   0   1    0.52    2.05
   3   0   1   -0.21    4.37
   3   0   1    3.42    4.84
   3   1  -2    6.94    2.43
   3  -1  -2    9.40    1.24
   3  -1  -2    4.85    3.33
  -3   1   2    9.39    4.97
   4   0  -1   -1.43    4.60
   4   0  -1   -1.39    1.82
   4   0  -1   -4.77    4.14
  -2   0  -2  809.30   62.44
   2   0   2  828.17   62.36
   2   0   2  795.07   62.14
  -2   0  -2  760.23   62.14
   2   0   2  824.87   62.31
  -2   0  -2  783.83   62.21
   0   0  -3   -3.24    3.29
   0   0  -3   -2.23    2.83
   0   0   3   -2.26    2.39
   0   0  -3   -4.12    2.87
  -4   0   2   84.65    8.53
  -4   0   2   93.08    8.05
   4   0  -2   79.68    9.09
   4   0  -2   88.51    8.22
  -4   0   2   95.72    7.94
   4   0  -2  102.53    7.83
   0   2   0 8989.44  722.22
   0   2   0 9343.75  722.31
   0   2   0 9749.39  722.15
   0   2   0 8767.78  722.15
   0   2   0 9999.00  722.52
  -3   0   3    2.77    3.46
  -3   0   3   -1.76    3.02
   3   0  -3   -1.92    2.85
   3   0  -3   -0.21    2.57
   4   0   0 1087.92   87.00
   4   0   0 1163.08   87.30
   4   0   0 1135.08   87.35
   1   2   0 1376.56  104.78
  -1  -2   0 1443.92  104.75
  -1   2   0 1198.80  104.64
  -1   2   0 1275.38  104.84
  -1  -2   0 1400.22  104.83
  -1   2   0 1278.68  105.07
   1   2   0 1416.72  104.75
   1  -2   0 1294.28  104.63
  -1  -2   0 1474.39  104.70
   1   2   0 1327.07  104.80
   1  -1  -3  997.52   78.66
  -1   1   3  987.59   78.75
  -1  -1   3  999.04   78.67
  -1   1   3 1056.27   79.03
  -1   1   3 1063.59   78.86
   1   1  -3  994.34   78.62
   1  -1  -3 1039.30   78.97
   1  -1  -3 1029.51   78.85
  -1  -1   3  995.31   78.57
   1   1  -3 1010.95   78.56
   1   1  -3  994.56   78.57
   0  -2   1  805.40   57.95
   0   2  -1  855.40   57.97
   0  -2  -1  738.55   57.93
   0   2   1  612.49   58.16
   0  -2   1  883.03   58.45
   0   2  -1  699.60   58.06
   0   2   1  621.61   58.12
   0   2  -1  736.23   58.32
   0  -2   1  677.56   57.97
  -2  -1   3   64.08    7.06
  -2  -1   3   65.07    6.88
   2   1  -3   97.63    6.99
  -2   1   3  153.53    8.33
   2  -1  -3  136.34    8.23
   2  -1  -3  113.07    8.27
  -2   1   3  145.14    7.43
   2  -1  -3  100.90    6.98
   2   1  -3   56.76    7.04
  -2   1   3   94.27    8.46
  -2  -1   3   76.07    6.85
   2   1  -3   70.43    6.95
  -1   2   1   68.29    7.57
  -1  -2   1   73.29    7.62
   1   2  -1   96.80    6.40
   1   2  -1   75.53    6.62
   1   2  -1   76.01    7.45
  -1   2   1   57.09    8.19
  -1   2   1   68.05    7.26
   1   2  -1   62.56    6.78
  -1  -2   1   68.32    6.57
  -3   1  -1  109.22    9.35
  -3   1  -1  116.79   10.26
   3  -1   1  113.49    9.26
   3  -1   1  120.30   10.82
   3   1   1  102.86    9.27
  -3  -1  -1  106.92    9.90
   3   1   1  120.45    9.46
   3   1   1  128.35   10.93
  -3   1  -1  109.93    9.42
   3  -1   1  119.76    9.44
  -4  -1   1  319.04   24.15
  -4   1   1  256.65   24.90
   4  -1  -1  312.27   24.28
   4  -1  -1  303.24   24.38
   4  -1  -1  323.98   25.19
   4   1  -1  298.98   24.75
  -4   1   1  300.90   24.34
   4   1  -1  319.53   24.45
   4   1  -1  306.33   24.16
  -2  -1  -2 1714.03  138.84
   2  -1   2 1772.93  138.92
   2   1   2 1864.10  138.68
   2  -1   2 1642.77  138.56
  -2   1  -2 1828.02  138.66
   2  -1   2 1860.01  138.60
  -2   1  -2 1781.66  138.57
  -2   1  -2 1778.49  138.79
   1   0   3   -1.80    3.51
  -1   0  -3    0.05    3.05
   1   0   3   -0.79    2.40
  -1   0  -3    0.24    2.71
  -1   0  -3   -4.13    4.23
   0   1   3  113.77   10.53
   0   1  -3  111.99    8.78
   0   1   3   97.24    9.78
   0  -1  -3   98.45    9.36
   0   1  -3  111.04    8.71
   0   1  -3  105.85    8.90
   0   1   3  105.28    9.51
   0  -1  -3  103.58    9.76
   0  -1  -3   92.18    9.27
  -1   2  -1  259.33   21.06
   1   2   1  250.21   20.73
  -1   2  -1  299.08   20.48
  -1   2  -1  231.12   20.50
  -1  -2  -1  241.96   20.48
   1  -2   1  260.35   20.36
   1   2   1  248.37   20.86
   4  -1  -2 1694.65  123.03
  -4  -1   2 1504.61  122.86
   4  -1  -2 1532.24  123.43
   4   1  -2 1553.40  122.97
   4  -1  -2 1599.84  122.75
  -4   1   2 1566.19  122.80
   2   2  -1    7.48    3.54
   2   2  -1    5.78    2.52
   2  -2  -1    9.55    3.37
   2   2  -1    8.52    2.45
  -2   2   1    6.60    5.08
   2   2  -1    9.76    2.69
  -2   2   1   10.68    4.36
   2  -2  -1    9.95    1.81
   2  -2  -1   10.49    6.87
  -2  -2   1    9.76    1.98
   3   1  -3   32.13    2.66
   3  -1  -3   31.82    4.02
   3   1  -3   25.88    3.26
   3   1  -3   25.31    3.04
   3  -1  -3   28.25    4.58
  -3  -1   3   28.77    2.82
   3   1  -3   25.32    2.77
   3   1  -3   31.91    2.83
   2   2   0   -0.45    3.35
   2  -2   0    0.66    1.83
   2   2   0   -2.48    3.40
   2  -2   0   -0.72    2.88
  -2  -2   0    0.39    2.61
  -2  -2   0   -0.70    2.19
  -2   2   0   -2.42    3.56
   2   2   0    1.03    3.04
  -2   2   0    3.30    4.41
  -2  -2   0    1.31    2.73
  -4   0   3    1.44    4.23
   4   0  -3    0.84    2.75
  -4   0   3    2.08    2.97
  -4   0   3   -0.19    3.20
   4   0  -3   -1.67    2.08
  -4  -1   0  108.21    9.30
  -4   1   0   88.95    9.61
  -4   1   0   87.63    8.67
  -4  -1   0  105.11    8.40
   4  -1   0  100.40   10.17
   4  -1   0   95.97    8.70
   4  -1   0   90.90    8.51
  -4  -1   0  105.75    8.50
   4   1   0  105.68    8.41
   4   1   0  131.53    8.92
   4   1   0  116.13   10.23
   3   0   2    6.27    2.35
   3   0   2    2.25    4.37
  -3   0  -2    3.15    2.92
   3   0   2    8.86    4.64
  -3   0  -2    3.85    2.96
  -3   0  -2    6.41    4.63
   1  -2  -2 1185.49   92.26
   1  -2  -2 1208.36   92.61
   1   2  -2 1177.49   92.29
   1   2  -2 1157.48   92.48
  -1  -2   2 1197.70   92.57
  -1   2   2 1170.23   92.36
  -1  -2   2 1184.08   92.26
  -1   2   2 1125.53   92.58
  -1  -2   2 1138.53   92.27
   1   2  -2 1354.31   92.34
  -1   2   2 1058.53   92.61
   1  -2  -2 1141.71   92.66
  -4   0  -1   -3.98    4.83
   4   0   1   -1.39    5.01
   4   0   1   -0.45    2.07
   4   0   1    1.72    4.91
  -5   0   1   -0.25    2.27
   5   0  -1   -1.84    4.66
  -5   0   1    1.40    3.76
  -5   0   1    3.16    3.95
   5   0  -1   -2.84    1.91
   5   0  -1    1.49    4.78
   0   2  -2 1512.29  123.40
   0  -2   2 1570.72  123.39
   0   2  -2 1773.51  123.50
   0   2   2 1610.95  123.82
   0   2   2 1641.28  123.69
   0   2  -2 1553.65  123.69
   0  -2   2 1619.68  123.40
   0  -2  -2 1538.42  123.46
   0  -2   2 1586.12  123.70
   0   2   2 1454.68  123.55
   5   0  -2   -0.53    3.97
   5   0  -2    3.69    2.04
  -5   0   2    0.27    3.38
   5   0  -2    3.99    4.65
  -5   0   2    3.84    3.82
  -5   0   2    6.30    2.85
  -2   2   2   38.55    5.64
  -2   2   2   24.76    5.59
  -2  -2   2   31.20    4.19
   2   2  -2   30.65    4.03
   2   2  -2   29.17    3.52
   2   2  -2   31.30    3.53
   2   2  -2   33.83    3.21
  -2   2   2   43.36    3.18
  -2   2   2   30.25    6.73
   2  -2  -2   45.68    5.34
  -2   2   2   27.87    3.41
  -1  -1  -3  310.46   24.77
   1   1   3  316.24   24.93
  -1  -1  -3  291.02   25.08
  -1  -1  -3  336.83   25.26
  -1  -1  -3  333.51   24.90
  -1   1  -3  287.29   24.81
  -1   1  -3  317.59   24.69
  -1   1  -3  310.83   24.75
   2   2   1 5875.35  483.16
  -2   2  -1 6912.19  483.03
   2   2   1 5829.25  483.16
   2  -2   1 7122.28  483.02
  -2  -2  -1 5915.79  483.07
  -2   2  -1 6450.84  483.04
  -2   2  -1 6518.00  483.36
  -2  -2  -1 5676.59  483.08
  -2  -2  -1 5570.49  483.13
   2   2   1 5809.54  483.04
   2   0  -4   47.88    5.46
  -2   0   4   46.26    4.29
  -2   0   4   45.27    6.69
  -2   0   4   50.88    5.39
   2   0  -4   56.36    4.70
   2   0  -4   54.35    5.93
  -3  -2   1   11.42    2.45
  -3   2   1    9.65    5.03
   3   2  -1   11.98    3.01
   3   2  -1    7.47    3.27
   3  -2  -1   10.73    6.61
   3  -2  -1    9.32    3.07
   3   2  -1   10.07    2.21
  -3   2   1    6.88    4.29
   3  -2  -1    7.06    1.83
  -3   2   1    4.75    1.91
   4   1  -3    6.08    2.39
   4   1  -3    6.17    1.64
  -4  -1   3    4.94    1.57
  -4  -1   3    6.47    1.47
  -4  -1   3    5.60    2.01
   4  -1  -3   -2.52    3.89
  -1   0   4 2644.43  207.95
   1   0  -4 2672.93  208.22
   1   0  -4 2676.78  208.08
   1   0  -4 2751.47  208.39
   1   0  -4 2659.72  208.03
  -3   0   4  354.48   27.57
  -3   0   4  334.79   26.89
   3   0  -4  346.04   26.94
   3   0  -4  341.58   27.32
   3   0  -4  379.62   27.50
  -3   0   4  371.93   27.30
  -2   0  -3    0.78    3.01
  -2   0  -3   -0.93    2.87
   2   0   3   -2.37    4.11
   2   0   3   -3.05    2.51
  -2   0  -3   -1.26    4.60
   3   2   0   -1.44    4.16
   3  -2   0    3.64    5.89
   3  -2   0    0.43    2.39
  -3   2   0    0.35    4.99
  -3   2   0    2.86    3.48
  -3  -2   0   -0.42    2.61
   3  -2   0   -0.52    2.49
  -3  -2   0   -2.12    2.74
  -3  -2   0    0.06    3.18
   3   2   0   -1.80    4.21
   3   2   0   -3.23    2.78
   1   2   2   92.65    9.40
   1   2   2   73.46    9.99
  -1  -2  -2   96.94    8.92
   1  -2   2  117.60    8.76
   1  -2   2  104.16    9.99
  -1   2  -2  103.11    8.63
  -1   2  -2  105.06    9.71
  -1   2  -2  112.19    8.77
   5   0   0   51.31    6.44
   5   0   0   49.04    6.43
  -5   0   0   41.20    4.47
   5   0   0   43.70    4.30
   3  -1   2  662.08   52.80
   3  -1   2  697.38   53.34
  -3   1  -2  669.41   53.10
   3   1   2  725.97   52.85
   3   1   2  692.86   52.72
   3  -1   2  640.59   52.69
  -3   1  -2  653.31   52.83
  -3  -1  -2  639.79   53.15
   3   1   2  636.07   53.25
  -3   1  -2  700.50   52.74
  -4  -1  -1   45.07    4.46
   4  -1   1   47.70    4.98
   4   1   1   43.47    7.18
   4  -1   1   41.01    7.01
  -4   1  -1   50.93    4.65
   4   1   1   49.88    5.20
  -4  -1  -1   44.03    4.45
  -4  -1  -1   39.85    5.86
   4  -1   1   37.45    4.46
  -4   1  -1   43.97    4.99
   4   1   1   46.29    4.37
  -4   1  -1   36.22    6.06
  -3   2   2   57.56    6.06
  -3   2   2   54.20    4.84
  -3   2   2   58.21    6.61
   3   2  -2   55.40    5.29
   3  -2  -2   57.48    4.74
   3  -2  -2   57.16    6.11
  -3   2   2   66.27    7.49
   5   1  -1    5.06    3.71
   5   1  -1    3.39    5.45
  -5  -1   1    3.92    1.89
   5  -1  -1   -2.13    6.11
   5  -1  -1    2.61    2.76
   5  -1  -1    4.06    2.23
  -5  -1   1    3.08    2.34
   5   1  -1    3.40    1.71
  -5   1   1    6.94    3.23
  -5   0   3    0.27    3.38
  -5   0   3   -0.96    2.72
   5   0  -3    4.62    3.11
  -5   0   3   -3.71    4.15
   5   0  -3    0.54    2.62
   5  -1  -2  910.83   69.15
  -5   1   2  906.97   69.25
   5   1  -2  899.91   69.25
   5  -1  -2  861.78   69.32
  -5  -1   2  916.60   69.33
   5   1  -2  832.75   69.06
   5   1  -2  868.54   69.47
  -5  -1   2  919.84   69.08
   5  -1  -2  904.65   69.90
   0   0  -4 1689.83  139.59
   0   0  -4 1782.65  139.61
   0   0   4 1817.15  139.48
   0   0  -4 1847.59  139.52
   2   1  -4  477.93   39.36
   2  -1  -4  533.28   39.89
   2  -1  -4  499.36   39.44
   2  -1  -4  513.48   39.78
  -2   1   4  584.05   39.59
   2   1  -4  500.37   39.39
  -2  -1   4  499.79   39.47
  -2  -1   4  499.86   39.34
   2   1  -4  478.20   39.47
   1  -1  -4   44.83    5.99
  -1   1   4   83.76    7.95
  -1  -1   4   59.45    5.41
  -1  -1   4   57.85    5.85
   1   1  -4   61.11    5.45
   1   1  -4   58.00    5.63
   1  -1  -4   65.65    6.24
  -1   1   4   44.62    6.52
   1   1  -4   58.58    5.33
   1  -1  -4   73.31    6.86
  -1   1   4   72.32    6.64
  -1  -1   4   56.60    5.22
   4   0  -4    0.50    3.43
  -4   0   4    0.11    3.29
   4   0  -4   -1.39    3.01
  -4   0   4    2.82    3.77
   3  -1  -4  120.10    9.88
   3   1  -4  112.43    8.86
   3   1  -4  102.93    9.42
  -3  -1   4  109.16    9.02
   3  -1  -4  137.16    9.75
   3  -1  -4  118.69    8.75
  -3  -1   4  101.97    8.79
   3   1  -4  109.67    9.14
   3   1  -4   99.74    8.96
  -3   1   4   99.75    8.95
  -2  -1  -3  137.44   12.39
   2   1   3  152.62   11.77
  -2   1  -3  126.72   11.60
  -2   1  -3  150.35   11.74
  -2  -1  -3  143.04   11.58
  -2   1  -3  150.36   11.52
  -2  -1  -3   96.59   12.32
  -2  -1  -3  135.66   11.68
   1  -2  -3  597.60   48.35
   1  -2  -3  609.66   48.73
  -1   2   3  615.49   48.55
   1   2  -3  619.22   48.30
  -1   2   3  625.95   48.81
  -1  -2   3  608.57   48.30
   1   2  -3  587.65   48.52
   1  -2  -3  630.35   48.78
  -1  -2   3  613.34   48.68
   1   2  -3  671.59   48.42
  -1   2   3  627.81   48.95
  -2   2   3  217.55   21.46
   2  -2  -3  249.13   21.26
  -2   2   3  238.48   22.08
  -2  -2   3  315.67   21.28
   2   2  -3  259.07   21.37
   2  -2  -3  210.96   21.92
  -2   2   3  242.24   21.98
   2   2  -3  277.33   21.43
   2  -2  -3  217.17   21.81
  -2  -2   3  310.25   21.64
   2   2  -3  306.36   21.28
   5  -1   0  177.24   15.30
   5   1   0  187.20   15.56
   5  -1   0  176.61   15.05
  -5  -1   0  191.74   14.97
   5   1   0  202.84   16.38
   5  -1   0  184.58   16.36
  -5  -1   0  194.06   15.08
   5   1   0  190.83   14.99
  -3   2  -1   27.40    5.45
   3  -2   1   37.07    3.73
  -3   2  -1   35.25    4.23
  -3  -2  -1   35.51    4.39
  -3   2  -1   34.20    3.61
  -3  -2  -1   29.12    5.02
   3  -2   1   25.57    3.63
   3   2   1   35.74    6.17
  -3  -2  -1   36.78    4.40
   3   2   1   32.88    4.18
  -3  -2  -1   33.14    3.75
   4  -2  -1  305.95   23.92
  -4   2   1  281.40   23.07
   4   2  -1  285.74   23.06
  -4   2   1  283.63   23.52
  -4  -2   1  268.27   22.38
   4  -2  -1  317.82   22.57
  -4   2   1  279.00   22.54
   4   2  -1  301.74   22.43
   4  -2  -1  261.67   22.73
   2   2   2 2391.21  199.28
  -2   2  -2 2608.52  199.68
   2   2   2 2433.70  199.52
   2  -2   2 2617.96  199.15
  -2   2  -2 2565.99  199.22
  -2  -2  -2 2626.22  199.37
  -2   2  -2 2592.28  199.19
  -5  -1   3  394.36   28.64
   5  -1  -3  377.39   28.47
  -5  -1   3  347.13   28.54
   5  -1  -3  382.11   29.00
  -5  -1   3  372.74   28.57
  -5   1   3  364.22   28.93
   5   1  -3  384.88   28.87
  -5   1   3  378.79   29.20
   5   1  -3  335.48   28.48
  -4   0  -2  144.59   12.80
   4   0   2  125.78   12.88
   4   0   2  159.95   11.92
  -4   0  -2  126.03   12.20
   4   0   2  158.29   12.94
   0  -1   4  196.62   16.00
   0  -1   4  194.32   16.04
   0  -1  -4  213.20   16.53
   0  -1  -4  203.11   16.95
   0   1   4  197.03   16.54
   0   1   4  198.28   16.72
   0   1  -4  211.26   16.19
   0   1  -4  208.33   16.10
   0   1  -4  194.47   16.05
   0  -1   4  195.90   16.46
   0  -1  -4  183.89   16.61
   0   2  -3 1707.88  129.79
   0  -2   3 1723.55  129.73
   0  -2  -3 1647.83  130.05
   0   2  -3 1673.21  129.72
   0   2   3 1658.60  130.23
   0   2  -3 1603.70  129.97
   0   2   3 1571.27  129.95
   0   2   3 1689.94  130.06
   0  -2  -3 1607.82  129.85
   0  -2  -3 1631.61  130.17
   0  -2   3 1719.34  130.11
   4   2  -2   98.27    8.67
  -4   2   2  100.55    9.37
   4  -2  -2   97.33    8.00
  -4   2   2  103.41    8.06
  -4   2   2  100.98   10.08
   4  -2  -2  114.67   11.27
   4  -2  -2   87.54    8.84
   3   2  -3  171.01   13.80
  -3   2   3  181.57   13.82
   3   2  -3  178.24   13.93
  -3  -2   3  174.87   13.96
  -3   2   3  171.30   14.76
   3   2  -3  171.85   14.00
   3  -2  -3  202.51   14.81
  -3   2   3  188.52   13.92
   3   2  -3  165.77   13.77
  -3   2   3  168.07   14.97
  -1   0  -4  684.88   54.64
  -1   0  -4  687.35   54.79
  -1   0  -4  736.06   54.57
   1   0   4  665.15   54.58
   1   0   4  699.17   54.54
   5   0   1   -1.73    2.54
  -5   0  -1   -2.05    4.96
   5   0   1   -2.25    5.72
   5   0   1   -6.54    5.23
  -4  -2   0    5.36    2.45
   4   2   0    4.92    5.19
   4   2   0   15.31    2.80
   4  -2   0    0.83    2.42
  -4   2   0   -1.62    3.71
  -4  -2   0    4.44    3.67
  -4  -2   0    2.93    2.70
   4  -2   0    0.40    6.44
   4  -2   0    2.44    2.43
  -4  -2   0   -3.06    3.41
  -4   2   0    2.50    5.11
   4   1  -4  204.35   16.38
  -4   1   4  201.09   17.21
   4   1  -4  205.30   16.50
   4  -1  -4  218.49   16.97
  -4   1   4  209.88   17.06
   4   1  -4  203.45   16.32
  -4  -1   4  217.56   16.46
   4   1  -4  204.43   16.57
   4  -1  -4  220.36   17.10
   4   1  -4  206.26   16.35
  -6   0   2   15.79    4.06
   6   0  -2   13.55    2.33
   6   0  -2   11.80    4.68
   6   0  -2   14.13    5.14
  -6   0   2   20.03    3.07
  -6   0   2   10.67    4.10
  -6   0   1   -2.92    2.60
   6   0  -1    0.55    4.97
  -6   0   1   -0.74    4.33
  -6   0   1   -4.78    4.32
   6   0  -1   -8.23    5.21
   6   0  -1   -2.58    2.32
  -3   0  -3   -0.52    5.23
   3   0   3   -0.83    2.58
  -3   0  -3   -1.16    2.97
  -3   0  -3   -2.81    3.29
   3   0   3   -2.00    4.67
  -5   0   4  497.75   36.75
  -5   0   4  520.09   36.32
   5   0  -4  443.47   36.03
  -5   0   4  505.25   36.39
   5   0  -4  500.26   36.35
   5   0  -4  449.83   35.87
  -4   1  -2  224.82   18.85
  -4  -1  -2  227.52   18.31
   4   1   2  244.35   18.59
   4  -1   2  226.09   18.26
  -4   1  -2  212.42   18.57
   4   1   2  244.49   18.34
   4   1   2  217.48   19.61
   4  -1   2  233.99   18.54
  -4   1  -2  250.33   18.36
   4  -1   2  223.67   19.53
  -4  -1  -2  168.33   18.92
  -1   2  -3    6.31    2.46
   1   2   3   -0.85    5.58
   1   2   3    4.97    5.83
   1  -2   3    5.79    2.41
   1  -2   3    6.97    5.28
  -1   2  -3    3.98    4.37
   1   2   3    3.52    4.29
  -1  -2  -3    1.36    3.85
  -1   2  -3    4.54    2.63
   6   0  -3    0.44    2.29
  -6   0   3   -1.96    4.04
   6   0  -3   -1.39    3.44
   6   0  -3    2.41    5.56
  -6   0   3   -1.79    3.28
  -6   0   3   -0.93    2.67
   0   3   0   15.55    5.52
   0   3   0   11.48    4.26
   0   3   0    2.02    1.81
   0   3   0   10.71    3.76
   0  -3   0   10.08    3.36
  -1   1  -4  347.98   27.71
  -1  -1  -4  355.51   27.89
   1   1   4  333.59   28.21
  -1  -1  -4  340.66   27.74
  -1  -1  -4  384.00   28.10
  -1  -1  -4  359.19   28.33
   1  -1   4  332.45   27.58
  -1   1  -4  356.13   27.58
  -1   1  -4  335.27   27.64
   1   1   4  358.37   27.88
  -5  -1  -1  410.52   31.76
  -5  -1  -1  408.12   31.64
   5   1   1  423.72   31.68
   5   1   1  425.19   32.59
   5   1   1  413.93   31.98
  -5   1  -1  395.73   32.28
   5  -1   1  379.62   32.62
  -5  -1  -1  341.01   32.26
   5  -1   1  392.88   31.85
  -5   1  -1  400.72   31.70
   5  -1   1  389.24   31.72
   4   2  -3   36.91    4.34
  -4   2   3   53.38    6.11
  -4   2   3   48.62    3.91
  -4   2   3   30.05    7.18
   4  -2  -3   45.07    5.61
  -4   2   3   45.77    6.56
   4   2  -3   43.38    3.89
  -6  -1   2  155.84   12.73
   6  -1  -2  178.11   14.20
   6  -1  -2  143.70   12.41
   6   1  -2  146.65   12.18
  -6  -1   2  153.21   12.54
  -6   1   2  151.08   13.47
   6   1  -2  154.01   12.79
   6  -1  -2  157.39   12.55
  -6   1   2  142.85   12.81
  -6   1   2  152.61   12.94
   6   1  -2  149.88   13.26
  -6  -1   2  167.07   12.24
   1   3   0  534.86   41.44
   1  -3   0  484.91   42.26
  -1   3   0  460.57   41.61
   1  -3   0  543.67   41.27
   1   3   0  533.44   41.55
   1  -3   0  494.96   41.52
  -1  -3   0  550.35   41.61
   1   3   0  583.86   42.17
  -1   3   0  513.43   42.02
   1   3   0  534.90   41.61
   6   0   0 2143.18  170.37
   6   0   0 2173.94  169.92
  -6   0   0 2202.67  169.91
   6   0   0 2232.80  170.25
  -6   0   0 2128.74  170.21
  -6  -1   1    7.81    3.81
  -6  -1   1    4.92    2.66
   6   1  -1    8.27    2.11
   6   1  -1   12.21    4.25
   6  -1  -1    8.71    3.18
   6  -1  -1    6.70    2.29
   6   1  -1   10.71    6.19
   6  -1  -1    5.66    6.34
  -6   1   1    7.30    3.70
  -6  -1   1    8.27    2.30
   3  -1   3   70.10    7.12
  -3   1  -3   71.40    7.16
  -3   1  -3   72.73    7.22
   3   1   3   84.37    7.34
  -3   1  -3   75.99    7.01
   3  -1   3   81.40    8.71
   3   1   3   78.96    6.75
   3  -1   3   72.27    6.66
  -3  -1  -3   71.72    8.13
  -2   0   5   -1.40    3.50
   2   0  -5   -1.40    3.11
   2   0  -5   -1.03    3.08
   2   0  -5    0.42    3.42
  -2   0   5   -0.88    1.94
   2   0  -5    4.10    4.59
  -3   0   5    1.39    1.39
   3   0  -5    4.59    3.79
  -3   0   5   -0.56    3.36
   3   0  -5    0.11    2.27
   3   0  -5    1.32    4.34
  -3   0   5   -0.82    4.91
   0   3  -1   89.61    7.67
   0  -3  -1   80.71    8.53
   0   3   1   88.88    8.78
   0  -3   1   92.44    7.84
   0   3   1   80.74    8.63
   0  -3   1  102.66    9.87
   0   3  -1   93.23    8.40
   0   3  -1   97.57    9.33
   0   3   1   73.06    9.78
   0  -3   1   99.72    7.67
   1   3  -1   96.89    7.68
  -1  -3   1   95.98    8.08
   1   3  -1   84.57    8.35
  -1   3   1   71.38    9.79
   1   3  -1   91.74    8.05
  -1   3   1   76.27    9.01
   1   3  -1  135.17    9.18
  -1   3   1   73.05    7.72
   1   3  -1  111.58    7.95
  -1   3   1   85.51    8.63
  -3   2  -2 4527.78  352.33
  -3  -2  -2 4365.45  352.65
  -3  -2  -2 4331.31  352.58
  -3  -2  -2 4541.65  352.34
   3   2   2 4569.98  352.43
  -3   2  -2 4547.98  352.42
  -3   2  -2 4346.89  352.78
  -3  -2  -2 4635.97  352.50
   3  -2   2 4648.44  352.33
  -4  -2  -1  446.26   34.24
   4   2   1  416.40   34.57
   4   2   1  441.48   33.92
  -4   2  -1  445.94   33.96
  -4  -2  -1  438.85   33.96
   4  -2   1  411.56   33.86
   4  -2   1  410.02   34.77
   4  -2   1  428.67   33.84
  -4   2  -1  405.00   34.57
  -4  -2  -1  440.24   34.19
  -4  -2  -1  422.94   33.82
   5  -1  -4 1345.70  107.45
  -5  -1   4 1354.45  107.16
  -5   1   4 1436.78  107.47
  -5  -1   4 1391.63  107.09
  -5   1   4 1462.51  107.41
   5   1  -4 1369.64  107.01
   5   1  -4 1352.45  107.10
  -5   1   4 1367.53  107.92
   5   1  -4 1349.75  107.13
  -5   2   1   17.26    2.86
  -5   2   1   19.00    4.43
   5  -2  -1   15.76    3.14
   5  -2  -1   28.22    7.05
   5   2  -1   18.23    2.88
   5  -2  -1   16.90    2.74
  -5   2   1   15.26    5.73
  -5  -2   1   19.03    2.36
  -5  -2   1   22.08    3.40
  -5  -2   1   20.23    2.70
   5   2  -1   22.63    5.27
   1   0  -5   -3.79    3.95
   1   0  -5   -1.95    3.12
  -1   0   5   -1.79    3.66
  -1   0   5    0.49    2.55
   1   0  -5    4.23    4.92
   1   0  -5    0.09    3.62
   2   0   4   50.73    6.30
   2   0   4   55.01    5.74
  -2   0  -4   64.34    5.95
   2   0   4   57.20    6.49
  -2   0  -4   55.09    7.00
  -2   0  -4   65.68    5.89
  -5  -2   2    0.99    2.45
   5   2  -2    7.98    4.07
   5  -2  -2    4.85    7.32
   5  -2  -2    6.43    3.36
  -5   2   2    6.88    4.68
  -5   2   2    7.37    5.31
  -5   2   2    5.63    2.12
   5  -2  -2    5.69    2.04
   6   1  -3   36.35    5.06
   6  -1  -3   39.50    7.96
   6  -1  -3   29.91    4.39
  -6   1   3   37.40    4.55
   6  -1  -3   38.23    3.57
  -6   1   3   36.57    5.30
  -6   1   3   40.17    6.35
   6   1  -3   43.20    5.29
  -6  -1   3   37.48    3.88
  -6  -1   3   35.68    4.01
   6   1  -3   40.18    3.38
  -1   3  -1  178.86   14.54
   1   3   1  153.60   13.88
  -1  -3  -1  165.90   13.75
  -1  -3  -1  161.99   13.94
  -1   3  -1  153.95   13.86
  -1   3  -1  165.43   13.43
   1  -3   1  177.04   13.34
   1   3   1  162.23   14.12
   1  -3   1  173.15   13.50
  -1  -3  -1  157.14   13.38
   1  -3   1  176.99   14.98
  -2   2   4   73.58    7.36
   2  -2  -4   14.57    5.02
   2  -2  -4    8.19    5.12
  -2   2   4   63.91    7.83
   2  -2  -4   31.24    3.59
  -2  -2   4   16.07    3.27
  -2   2   4   22.07    5.14
   2   2  -4   60.58    3.65
  -2  -2   4   42.88    5.10
   2   2  -4   14.64    3.43
  -2  -2   4   54.58    3.63
   2   2  -4   29.83    3.78
  -2   3   1   15.52    2.34
  -2   3   1   11.29    4.44
   2   3  -1   11.73    2.09
   2   3  -1   10.76    4.63
  -2   3   1   35.69    6.00
  -2  -3   1   12.13    3.11
   2   3  -1   11.81    3.41
   2   3  -1   11.74    3.23
   2   3  -1   12.17    3.37
   4   0  -5   -2.77    3.43
  -4   0   5   -0.14    3.26
   4   0  -5    1.33    3.85
  -4   0   5    0.31    0.75
   4   0  -5    1.22    1.26
  -4   0   5   -1.47    4.29
   2  -3   0  853.39   64.61
  -2   3   0  814.35   65.01
   2  -3   0  893.41   65.55
   2   3   0  802.35   64.86
   2   3   0  825.08   64.91
  -2  -3   0  825.19   64.70
  -2  -3   0  837.69   64.75
   2   3   0  774.04   64.80
  -2  -3   0  850.25   64.87
  -2   3   0  787.01   65.35
   1  -2  -4  281.85   22.55
  -1  -2   4  274.61   22.89
   1   2  -4  290.45   22.42
   1   2  -4  280.84   22.38
  -1  -2   4  283.90   22.37
  -1  -2   4  275.09   22.38
   1   2  -4  275.35   22.55
  -1   2   4  294.33   23.05
  -1   2   4  316.64   23.54
   1  -2  -4  293.94   22.96
  -1   2   4  267.17   22.86
   1  -2  -4  291.20   23.17
  -3  -2   4  638.96   51.97
   3   2  -4  693.25   51.99
   3   2  -4  669.56   52.06
  -3  -2   4  619.95   52.11
  -3   2   4  677.38   52.52
  -3   2   4  674.22   52.61
   3  -2  -4  699.36   52.68
   3  -2  -4  663.88   52.50
  -3   2   4  633.87   52.06
   3   2  -4  646.59   51.91
   3  -2  -4  703.53   51.92
  -6   1   0  145.22   13.20
   6   1   0  146.55   14.27
   6  -1   0  143.60   13.83
   6   1   0  170.88   13.33
   6   1   0  153.01   12.33
   6  -1   0  152.17   12.71
  -6  -1   0  150.91   12.46
   6  -1   0  146.42   12.41
  -6  -1   0  157.37   12.34
   2   2   3  538.37   43.29
  -2   2  -3  540.84   42.60
   2   2   3  568.92   42.87
  -2   2  -3  550.46   42.67
   2  -2   3  525.84   43.42
  -2  -2  -3  497.73   42.83
  -2   2  -3  537.95   43.09
   2  -2   3  557.89   42.59
   2   1  -5  134.37   12.98
   2  -1  -5  147.38   13.07
   2   1  -5  142.62   12.08
  -2   1   5  162.60   12.55
   2   1  -5  147.33   12.20
  -2  -1   5  158.22   12.41
  -2  -1   5  158.41   12.00
   2   1  -5  148.18   12.35
   2  -1  -5  126.62   12.46
   2  -1  -5  162.46   12.81
   6   0  -4 1910.43  142.66
  -6   0   4 1790.94  143.05
   6   0  -4 1755.30  142.78
  -6   0   4 1828.52  142.78
  -6   0   4 1810.16  142.83
   3   1  -5    4.20    3.06
   3  -1  -5    9.24    4.14
  -3  -1   5    4.97    1.59
  -3   1   5   13.21    4.68
   3  -1  -5    4.07    4.47
  -3   1   5    4.08    2.24
   3   1  -5    0.41    3.95
   3  -1  -5    8.86    2.39
   3   1  -5    2.21    2.47
  -3  -1   5    4.51    2.81
  -3   1   5    7.86    5.76
   3   1  -5    4.31    1.72
  -5   2   0  129.06   11.25
   5  -2   0  123.92   12.91
   5  -2   0  137.28   11.18
   5  -2   0  140.52   11.12
  -5   2   0  125.90   12.34
  -5   2   0  136.60   11.52
  -5  -2   0  136.15   11.68
  -5  -2   0  141.08   11.03
   5   2   0  138.91   11.19
   5   2   0  132.05   12.60
  -5  -2   0  123.82   11.22
  -5  -2   0  144.18   11.79
   1   3  -2  116.24   11.92
  -1   3   2  148.66   12.93
  -1  -3   2  129.53   11.61
   1   3  -2  141.78   11.70
  -1   3   2  170.81   12.91
   1   3  -2  126.31   12.29
  -1  -3   2  141.49   11.64
  -1  -3   2  152.09   12.76
  -1   3   2  210.80   12.17
   5   0   2    3.40    5.05
   5   0   2   11.37    2.84
  -5   0  -2   11.81    5.28
   5   0   2    9.09    5.82
   0   0  -5   -0.92    3.43
   0   0  -5    1.56    3.46
   0   0  -5   -1.41    5.35
   0   0   5   -1.18    2.97
   0   0  -5   -0.59    4.40
   0   3  -2 1540.29  125.56
   0  -3   2 1592.63  125.46
   0  -3  -2 1450.07  125.75
   0  -3  -2 1747.40  125.51
   0   3   2 1538.61  125.78
   0  -3   2 1737.84  125.94
   0  -3  -2 1384.68  125.83
   0   3   2 1604.45  125.88
   0   3  -2 1531.99  125.84
   0  -3   2 1632.03  125.47
   0   3  -2 1717.63  125.58
   0   3   2 1665.00  125.67
   1   1  -5  181.93   15.02
   1  -1  -5  192.09   15.88
  -1  -1   5  178.17   14.82
  -1  -1   5  201.86   15.30
   1   1  -5  186.15   15.00
   1  -1  -5  185.46   15.48
  -1   1   5  211.23   15.39
  -1  -1   5  172.22   15.01
   1  -1  -5  187.22   15.55
   1   1  -5  181.67   15.13
   5   2  -3  107.95    8.65
   5  -2  -3   95.76    7.87
   5  -2  -3  101.99    9.07
  -5   2   3   96.48    8.00
  -5  -2   3  100.23    8.14
  -2  -1  -4   73.70    7.12
  -2   1  -4   77.99    6.93
  -2  -1  -4   68.04    8.48
   2   1   4   88.63    7.43
  -2   1  -4   74.84    7.05
  -2   1  -4   75.16    7.11
  -2  -1  -4   71.16    7.08
  -2  -1  -4   62.54    8.22
   2   1   4   62.16    8.84
  -2  -3   2   11.13    4.81
  -2   3   2   -1.98    5.13
   2   3  -2    3.61    2.92
   2   3  -2    3.73    3.86
   2   3  -2   -0.84    1.75
  -2   3   2    1.58    2.36
  -2   3   2   -0.82    4.65
   2   3  -2    5.40    2.56
  -2   3   2   -5.51    7.00
  -2  -3   2    1.89    1.97
  -2   3   2    6.45    1.72
  -4   0  -3   -9.62    5.51
   4   0   3   -8.76    5.06
   4   0   3   -2.29    4.73
  -4   0  -3    0.53    3.29
  -4   0  -3   -4.72    3.21
   4   0   3   -5.74    2.94
   0   2   4  378.25   28.22
   0   2  -4  322.24   27.38
   0   2   4  379.49   27.71
   0   2   4  315.80   27.88
   0   2  -4  328.24   27.17
   0   2  -4  369.98   27.16
   0  -2  -4  311.43   27.39
   0  -2  -4  345.02   27.91
   0  -2  -4  345.84   27.67
   0  -2   4  325.29   27.10
   0  -2   4  386.44   27.22
   0  -2   4  337.80   27.84
  -2   3  -1  163.13   14.04
   2  -3   1  199.85   15.51
   2   3   1  166.36   14.36
   2  -3   1  165.14   13.71
   2  -3   1  174.74   13.51
  -2   3  -1  153.90   13.59
  -2  -3  -1  173.11   13.96
  -2  -3  -1  179.14   13.73
  -2  -3  -1  166.14   14.07
  -2   3  -1  146.26   14.78
   2   3   1  167.60   14.04
   7   0  -2  100.61    9.56
  -7   0   2  100.47    9.06
   7   0  -2   93.72    9.48
  -7   0   2  107.01    9.08
  -7   0   2   98.35    8.31
   7   0  -2   89.55    8.00
   4   1  -5   14.99    2.65
   4  -1  -5   13.09    4.21
   4  -1  -5    8.46    3.60
   4   1  -5   14.39    3.65
  -4  -1   5   13.89    2.83
  -4   1   5    7.12    5.19
   4   1  -5   12.81    1.92
   4   1  -5   11.16    3.15
  -4   1   5   16.20    4.59
  -4  -1   5   11.98    1.68
   3   3  -1    1.89    2.83
  -3  -3   1    1.74    2.01
   3   3  -1   -0.73    3.53
   3   3  -1   -6.57    4.60
   3   3  -1    4.70    3.41
  -3   3   1    1.02    1.96
  -3   3   1    3.24    5.36
   3  -3  -1    0.73    1.84
  -3   3   1    3.12    4.49
  -3  -3   1    1.81    2.70
  -4  -2   4   79.55    6.56
   4   2  -4   75.96    6.61
   4   2  -4   66.44    6.41
   4  -2  -4   84.21    7.46
  -4   2   4   86.19    6.61
   4   2  -4   83.91    6.29
   4   2  -4   77.17    6.49
   4   2  -4   73.09    6.55
   4  -2  -4   80.29    7.93
  -4   2   4   80.79    6.34
   6   0   1   -3.29    5.53
   6   0   1   -1.74    6.12
  -6   0  -1   -2.97    3.12
   6   0   1   -2.33    2.75
  -5   0   5   -0.33    4.24
   5   0  -5    0.71    0.79
   5   0  -5    1.05    3.71
   5   0  -5   -2.24    3.18
   5   0  -5   -0.91    1.09
  -5   0   5   -0.41    3.50
   3  -3   0  284.68   23.18
   3   3   0  301.93   23.43
  -3  -3   0  301.47   23.36
   3   3   0  295.30   23.65
  -3  -3   0  296.42   23.51
   3   3   0  291.34   23.79
  -3   3   0  282.31   23.75
  -3   3   0  289.01   24.38
  -3  -3   0  294.69   23.39
  -6   1   4   96.24    8.40
  -6  -1   4  104.62    7.10
  -6  -1   4   95.76    7.37
   6   1  -4   99.47    7.89
  -6  -1   4  102.38    7.49
  -6   1   4   89.56    8.57
   6  -1  -4   86.43    8.15
   6  -1  -4   73.90    6.83
  -6   1   4  103.63    9.36
   6   1  -4   96.67    7.19
  -7   0   1    0.23    4.52
  -7   0   1   -1.23    4.84
   7   0  -1   -0.21    2.51
   7   0  -1   -5.09    5.69
  -7   0   1   -2.58    2.82
   7   0  -1   -4.67    5.51
   1   3   2   66.47    8.25
  -1  -3  -2   70.04    7.29
   1  -3   2   65.04    7.17
  -1   3  -2   86.63    7.21
  -1  -3  -2   58.96    7.84
   1  -3   2  138.45    7.68
   1   3   2   68.09    8.61
   1   3   2   58.18    8.33
  -1   3  -2  141.27    8.55
  -1  -3  -2   53.02    8.10
  -1   3  -2   76.86    8.71
   7   0  -3   -3.21    2.19
   7   0  -3   -2.93    5.30
   7   0  -3    2.80    4.09
  -7   0   3   -0.46    3.35
  -7   0   3   -1.30    4.17
  -7   0   3   -0.07    3.35
   5  -1   2   49.81    4.78
   5  -1   2   43.85    7.44
  -5  -1  -2   45.28    5.13
  -5   1  -2   48.06    5.12
  -5  -1  -2   36.50    6.95
   5   1   2   50.66    8.50
  -5   1  -2   47.14    6.27
   5   1   2   42.82    4.85
  -5  -1  -2   50.06    5.07
   5   1   2   52.07    6.04
  -5   1  -2   42.73    6.19
   5  -1   2   45.69    5.41
  -3   3   2  307.32   25.52
   3  -3  -2  298.83   24.69
  -3   3   2  287.75   24.71
  -3   3   2  305.92   23.98
   3   3  -2  337.91   24.06
   3   3  -2  294.26   24.04
   3   3  -2  279.49   24.24
   3   3  -2  298.47   24.24
  -3   3   2  298.67   24.54
   3   3  -2  285.89   24.01
  -3   3   2  313.33   23.99
   0   1  -5    3.84    3.31
   0  -1  -5    2.09    4.04
   0   1  -5    0.74    3.16
   0  -1   5    0.61    2.77
   0   1  -5   -0.45    3.00
   0  -1  -5    2.50    4.91
   0   1   5   -4.78    4.58
   0  -1   5    0.28    2.61
   0  -1  -5    2.63    4.89
   0  -1  -5    1.20    3.65
   0  -1   5    0.09    4.17
   0   1   5    0.08    5.07
  -4  -2  -2   -2.67    3.46
   4  -2   2   -0.67    2.91
   4  -2   2    0.21    2.53
  -4  -2  -2    1.82    4.19
  -4  -2  -2    1.26    3.24
   4   2   2    4.87    6.80
  -4  -2  -2   -0.98    4.78
   4   2   2   -2.44    3.61
  -4   2  -2    0.98    3.07
  -4   2  -2   -2.32    3.22
  -4   2  -2    4.36    5.13
  -4   1  -3   53.51    6.23
   4  -1   3   56.50    7.73
   4   1   3   48.48    6.06
  -4   1  -3   49.85    5.38
   4   1   3   50.91    5.27
  -4  -1  -3   53.71    7.48
   4  -1   3   51.24    5.82
  -4   1  -3   51.73    5.90
   4  -1   3   48.70    5.17
   3   0   4 2040.08  157.15
  -3   0  -4 2062.32  157.03
  -3   0  -4 1942.73  157.25
  -3   0  -4 2041.27  156.91
   3   0   4 1961.29  156.92
   7   1  -2  108.23   10.69
  -7  -1   2  104.63    9.48
   7  -1  -2   98.27   11.00
  -7  -1   2  104.94    9.11
  -7   1   2  112.81    9.54
  -7  -1   2  110.86    8.71
   7   1  -2  107.74    8.64
   7  -1  -2   96.87    8.93
   7  -1  -2  116.27    9.04
   7   1  -2  102.54    9.56
  -7   1   2   86.59   10.18
  -7   1   2  100.43    9.82
  -1  -2  -4  239.62   19.05
   1   2   4  233.83   19.51
  -1  -2  -4  210.79   18.68
   1   2   4  219.93   19.45
   1  -2   4  234.87   18.23
  -1   2  -4  228.32   18.33
   1  -2   4  219.15   19.25
  -1   2  -4  223.13   18.31
  -1   2  -4  212.44   18.60
  -1  -2  -4  231.95   18.71
   1   2   4  245.67   18.76
  -5  -2  -1   59.56    6.54
   5  -2   1   53.11    8.28
   5   2   1   66.14    8.63
   5  -2   1   48.87    5.57
  -5  -2  -1   63.58    5.78
   5  -2   1   51.02    5.53
  -5   2  -1   56.86    7.30
  -5  -2  -1   46.11    6.79
  -5  -2  -1   63.30    5.43
   5   2   1   61.65    5.93
  -5   2  -1   52.38    5.93
  -1   0  -5   -3.70    3.71
  -1   0  -5   -4.84    3.72
   1   0   5    1.73    3.61
  -6  -1  -1   54.01    7.75
  -6  -1  -1   72.59    6.19
  -6  -1  -1   62.52    6.32
   6   1   1   65.61    6.03
   6  -1   1   75.85    6.27
   6  -1   1   62.02    8.70
   6   1   1   45.59    9.27
   6  -1   1   50.33    6.66
   6   1   1   72.09    7.55
   6   2  -2  804.97   66.15
  -6  -2   2  857.65   66.38
   6  -2  -2  856.53   66.44
   6   2  -2  840.18   66.64
  -6   2   2  842.12   66.27
  -6  -2   2  853.34   66.00
   6  -2  -2  907.92   67.30
   6  -2  -2  855.08   66.15
  -5   1   5  110.69   10.21
   5   1  -5  108.77    9.25
  -5   1   5  116.38    9.97
   5   1  -5  111.77    8.79
  -5  -1   5  107.95    9.08
  -5  -1   5  102.23    9.53
   5  -1  -5  110.70    9.97
   5  -1  -5  100.83    9.71
   5   1  -5  106.83    8.86
   5   1  -5  111.63    9.14
   6  -2  -1   85.07    7.27
  -6   2   1   70.42    9.32
   6  -2  -1   78.76    7.48
   6  -2  -1   81.98    9.93
  -6   2   1   77.99    7.50
   6   2  -1   85.78    7.62
   6   2  -1   80.01    9.12
  -6  -2   1   86.32    7.01
  -6  -2   1   93.25    7.23
  -3  -2  -3   -4.06    4.67
  -3   2  -3    3.65    3.04
  -3   2  -3   -1.49    4.83
   3   2   3   -0.27    4.08
  -3   2  -3    1.10    3.08
  -3  -2  -3    4.94    3.37
   3  -2   3    1.06    2.89
   1   3  -3   90.88    7.33
  -1  -3   3  102.53    7.70
   1   3  -3   37.95    5.91
  -1   3   3   32.82    7.98
  -1   3   3   28.92    7.64
   1  -3  -3   25.20    5.67
  -1   3   3   32.80    6.72
  -7   1   1  221.59   18.92
   7  -1  -1  244.46   18.58
  -7   1   1  243.47   18.59
  -7  -1   1  222.58   18.44
   7   1  -1  229.96   18.97
   7   1  -1  216.37   18.19
  -7  -1   1  240.52   18.21
  -7   1   1  221.57   19.31
   7   1  -1  235.02   19.70
   7  -1  -1  232.69   19.81
  -7  -1   1  224.02   18.93
   7  -1  -1  227.43   18.35
  -2   3   3  121.72   11.07
  -2   3   3  106.54   12.17
  -2   3   3  107.86   12.38
   2   3  -3  154.27   11.88
  -2   3   3  114.61   11.42
  -2  -3   3  181.90   11.20
   2   3  -3  150.48   11.34
   2   3  -3  142.48   11.30
  -2  -3   3  159.42   12.05
   2  -3  -3  106.31   11.81
   2  -3  -3   94.97   12.27
  -3   3  -1   93.12    8.68
  -3   3  -1   99.54    9.81
  -3  -3  -1   94.64    8.61
  -3  -3  -1   91.17    8.24
   3   3   1   92.92    9.29
  -3  -3  -1   84.55    8.73
   3   3   1   94.75    9.33
   3   3   1   92.05    8.58
   3  -3   1  107.50   10.48
   3  -3   1  102.08    8.09
  -7   1   3  389.87   30.20
   7   1  -3  385.22   29.55
  -7  -1   3  375.85   29.88
  -7   1   3  339.12   29.99
   7  -1  -3  379.43   30.95
   7  -1  -3  368.58   29.67
   7   1  -3  388.25   30.04
  -7  -1   3  384.94   29.72
   7   1  -3  382.23   30.28
   7  -1  -3  365.13   29.89
  -7   1   3  345.48   30.60
  -7  -1   3  397.68   29.89
   5   2  -4   33.37    2.89
   5   2  -4   25.12    3.57
   5  -2  -4   23.88    4.94
  -5   2   4   26.90    2.67
   4   3  -1  283.20   23.41
   4  -3  -1  281.89   24.54
  -4   3   1  284.40   24.04
   4  -3  -1  292.13   23.25
  -4   3   1  269.28   23.59
   4  -3  -1  298.35   22.79
  -4  -3   1  276.47   22.98
   4   3  -1  286.08   22.87
  -4  -3   1  292.07   22.89
  -4  -3   1  305.56   22.99
   4   3  -1  293.24   23.09
  -4   3   1  279.86   22.90
   7   0   0  513.02   42.97
   7   0   0  569.68   43.63
  -7   0   0  593.00   42.99
  -7   0   0  504.71   43.37
   7   0   0  570.58   43.82
  -7   0   0  556.15   43.71
   2   3   2   21.51    4.65
   2  -3   2   21.18    3.06
  -2  -3  -2   18.16    4.06
   2  -3   2   17.61    6.42
   2   3   2   16.99    5.81
   2  -3   2   15.63    3.13
  -2  -3  -2   18.18    4.36
  -2   3  -2   16.84    5.17
  -2  -3  -2   18.56    3.36
  -2   3  -2   17.69    3.95
  -2   3  -2   19.78    2.85
  -7   0   4 1291.26  104.17
  -7   0   4 1250.01  104.46
   7   0  -4 1326.06  104.15
  -7   0   4 1422.13  104.29
   7   0  -4 1389.15  104.15
  -7   0   4 1320.00  104.02
  -6   0   5    0.65    5.36
   6   0  -5    9.00    3.73
   6   0  -5   -0.24    1.89
   6   0  -5    0.59    0.61
  -6   0   5   12.47    4.21
  -6   0   5    5.21    3.62
   0   3  -3 1682.36  133.59
   0   3  -3 1696.20  133.22
   0   3  -3 1800.87  133.30
   0  -3   3 1636.75  133.19
   0  -3  -3 1704.29  133.28
   0   3   3 1708.63  133.71
   0   3   3 1705.95  133.47
   0   3   3 1770.35  133.58
   0  -3   3 1713.03  133.64
   6  -2  -3  104.40    8.23
   6  -2  -3   93.85    9.20
  -6  -2   3  110.86    8.54
   6   2  -3   99.71    9.20
   6  -2  -3  106.91   11.77
  -6   2   3   90.46    8.38
   4  -3  -2   94.31   12.64
   4   3  -2  110.96    9.62
  -4   3   2  120.53   11.02
  -4   3   2  133.22    9.75
   4   3  -2  110.13   10.26
   4  -3  -2  111.38   10.67
  -4   3   2  119.31   11.71
   4   3  -2  111.21    9.90
   4   3  -2  125.79    9.79
   4  -3  -2  118.11    9.59
  -3   1  -4   68.03    7.00
   3   1   4   71.37    6.47
  -3  -1  -4   69.39    6.80
  -3  -1  -4   76.04    6.88
  -3   1  -4   62.87    6.67
   3   1   4   72.37    7.15
   3  -1   4   60.56    6.32
  -3   1  -4   68.44    6.58
  -3  -1  -4   69.47    8.31
   3   1   4   49.84    8.89
   3   3  -3  132.13   11.68
   3   3  -3  134.37   11.78
  -3   3   3  152.00   11.72
  -3   3   3  159.12   14.15
   3  -3  -3  143.37   12.60
  -3   3   3  150.38   11.54
  -3   3   3  157.92   12.72
  -3  -3   3  128.14   12.16
  -3   3   3  142.12   12.74
   3   3  -3  143.12   11.65
   3   3  -3  148.49   11.90
  -1   1  -5   58.57    6.07
   1  -1   5   54.38    6.96
  -1  -1  -5   63.79    7.14
   1  -1   5   58.01    5.81
  -1   1  -5   58.01    5.90
   1   1   5   65.11    6.75
   1   1   5   55.90    7.53
  -1  -1  -5   66.24    6.31
  -1   1  -5   58.20    5.92
  -1  -1  -5   54.82    6.47
  -1  -1  -5   62.13    7.56
   1  -1   5   55.08    5.81
   4   3   0  323.90   26.71
  -4   3   0  331.98   26.33
  -4  -3   0  329.50   26.40
   4   3   0  324.47   26.31
  -4   3   0  297.55   27.14
  -4   3   0  338.93   26.71
   4   3   0  319.45   26.86
  -4  -3   0  333.88   26.37
  -4  -3   0  350.31   26.47
   4  -3   0  338.70   26.23
   6  -2   0  757.29   59.97
  -6  -2   0  765.45   59.01
   6  -2   0  747.19   59.01
  -6  -2   0  779.30   58.89
   6   2   0  766.11   58.91
   6   2   0  785.73   59.85
   6  -2   0  720.14   59.04
  -6   2   0  748.87   59.19
  -6   2   0  714.58   59.13
   6   2   0  775.31   59.09
  -6   2   0  694.68   59.78
   2  -2  -5   41.33    6.13
  -2   2   5   46.15    7.05
   2   2  -5   36.14    4.22
  -2  -2   5   31.09    5.50
   2   2  -5   43.63    4.38
  -2  -2   5   39.51    4.06
  -2  -2   5   38.43    4.31
   2   2  -5   47.76    4.55
   2  -2  -5   58.93    4.54
  -2   2   5   46.48    6.44
  -2   2   5   50.93    6.06
   2  -2  -5   45.63    5.75
   3   0  -6  337.80   24.48
   3   0  -6  292.16   24.49
  -3   0   6  249.14   23.48
   3   0  -6  329.68   24.40
   3   0  -6  315.52   23.98
   3   2  -5    3.52    2.48
  -3  -2   5    3.86    3.46
   3   2  -5    2.99    2.21
   3  -2  -5    0.39    4.81
   3   2  -5    2.21    1.81
   3  -2  -5    5.51    4.64
  -3   2   5   -1.43    3.76
   3  -2  -5    9.73    2.01
  -3  -2   5    4.89    1.78
  -3  -2   5    3.54    2.04
   2   0  -6  179.94   15.72
   2   0  -6  223.06   16.56
  -2   0   6  176.31   15.17
  -2   0   6  202.40   15.93
   2   0  -6  180.67   15.71
   2   0  -6  214.83   15.93
   7   1   0  893.00   65.42
  -7   1   0  786.05   64.54
  -7   1   0  853.41   64.98
   7  -1   0  833.43   64.66
   7  -1   0  782.30   65.25
   7   1   0  866.69   65.00
   7  -1   0  806.38   64.53
   7   1   0  824.93   64.45
  -7  -1   0  790.75   64.56
  -7  -1   0  852.79   64.44
   1  -2  -5  190.57   15.33
   1   2  -5  178.93   14.69
   1   2  -5  188.06   14.59
  -1   2   5  178.59   15.98
  -1  -2   5  175.95   14.50
  -1  -2   5  185.70   15.36
  -1  -2   5  178.35   14.50
   1   2  -5  170.62   14.57
   1  -2  -5  201.25   15.49
   1  -2  -5  179.28   14.84
  -1   2   5  177.14   15.33
  -1   2   5  171.36   15.45
  -2   2  -4  382.77   30.83
  -2  -2  -4  367.93   30.90
  -2   2  -4  390.21   30.65
   2  -2   4  365.93   31.37
   2   2   4  381.25   31.57
   2   2   4  406.82   30.86
  -2   2  -4  404.85   30.56
   2  -2   4  373.79   30.50
  -4   0   6 1992.37  158.89
   4   0  -6 2213.14  158.81
   4   0  -6 2074.12  158.68
  -4   0   6 2030.12  158.61
   4   0  -6 2055.47  158.31
  -4   0   6 1986.12  158.19
   7   1  -4   22.16    2.61
  -7  -1   4   25.76    3.43
   7   1  -4   30.41    4.63
  -7   1   4   23.93    4.53
  -7   1   4   25.31    5.18
   7  -1  -4   24.33    4.23
  -7  -1   4   24.01    3.66
  -7  -1   4   25.39    2.98
   7  -1  -4   22.12    2.44
  -7   1   4   21.70    5.93
  -7  -1   4   27.87    3.25
  -6  -1   5  184.83   14.29
  -6   1   5  167.66   16.17
  -6  -1   5  192.21   14.85
  -6   1   5  176.50   15.09
   6   1  -5  179.82   14.31
   6   1  -5  179.46   14.34
   6   1  -5  171.63   13.98
  -6  -1   5  186.06   14.52
  -6   1   5  187.58   14.94
   6  -1  -5  158.10   14.98
  -1   3  -3   48.68    4.53
  -1   3  -3   26.56    5.03
  -1  -3  -3   41.37    5.87
   1   3   3   75.70    7.77
  -1  -3  -3   44.74    6.34
  -1  -3  -3   44.22    4.99
   1  -3   3   42.22    7.11
   1  -3   3   31.32    4.63
  -1   3  -3   28.30    6.55
   1   3   3   47.63    6.95
   1  -3   3   52.76    4.80
   6   0   2    5.91    5.52
   6   0   2    6.42    3.02
  -6   0  -2    7.14    5.64
   6   0   2   13.84    6.13
   5   0   3   -1.25    5.97
  -5   0  -3   -4.64    6.31
  -5   0  -3   -5.72    3.35
   5   0   3   -3.87    5.19
   5   0   3   -6.98    3.01
  -4   2   5    7.85    2.94
   4   2  -5    6.66    1.93
   4  -2  -5    8.72    4.35
   4  -2  -5    4.04    4.45
  -4  -2   5    9.73    2.88
   4   2  -5    5.70    3.17
   4   2  -5    7.03    2.42
   4   2  -5    6.14    1.83
  -2   0  -5   -0.11    3.76
  -2   0  -5   -7.76    3.79
  -2   0  -5   -5.58    5.87
   2   0   5   -6.06    4.55
   2   0   5   -1.23    3.33
   2   0   5    2.23    3.76
   4   3  -3   94.89    8.51
   4   3  -3   95.38    7.97
   4   3  -3  105.92    8.07
   4  -3  -3  101.60    9.48
  -4   3   3  101.72   10.82
  -4   3   3  123.39    8.09
  -4   3   3  100.60    9.83
  -4   3   3  103.83    9.44
  -4   3   3  104.44    8.00
   4   3  -3   85.57    7.87
   4   3  -3   80.41    7.83
   1   0  -6  239.69   19.32
   1   0  -6  231.29   19.10
   1   0  -6  242.53   19.90
  -1   0   6  237.43   19.23
  -1   0   6  223.81   18.81
   1   0  -6  247.88   19.40
  -3   1   6  740.18   38.63
  -3   1   6  570.03   37.76
   3  -1  -6  825.37   38.16
  -3  -1   6  408.08   37.89
   3   1  -6  389.44   38.18
   3   1  -6  416.17   37.95
  -3   1   6  562.24   38.90
   3   1  -6  378.35   37.71
   3  -1  -6  589.74   38.74
   3  -1  -6  690.90   38.78
   3   1  -6  403.79   37.81
  -3  -1   6  380.60   37.62
   6   2  -4   23.25    3.95
  -6   2   4   13.64    5.41
  -6  -2   4   22.38    2.65
   6  -2  -4   17.17    4.37
   6  -2  -4   20.22    2.03
  -6   2   4   14.11    4.90
  -8   0   2   14.43    5.17
   8   0  -2   19.67    5.93
   8   0  -2   20.58    6.22
   8   0  -2   20.38    2.95
  -8   0   2   18.31    4.80
  -8   0   2   19.60    3.54
  -3  -3  -2    1.21    4.59
   3   3   2    3.27    5.72
  -3   3  -2    3.05    3.63
   3  -3   2    5.28    2.90
  -3   3  -2    3.44    2.63
  -3   3  -2   11.81    5.83
   3  -3   2    6.61    6.62
   3  -3   2    2.32    2.85
  -3  -3  -2   -4.99    3.76
   3   3   2    0.62    4.17
  -3  -3  -2   -1.56    3.86
  -4  -3  -1   37.36    4.72
  -4   3  -1   30.33    6.18
  -4  -3  -1   36.80    4.88
   4   3   1   37.31    4.78
   4   3   1   41.69    6.66
  -4   3  -1   29.07    5.12
  -4  -3  -1   37.33    5.54
   4  -3   1   38.65    4.29
   2   1  -6 1127.84   85.98
   2   1  -6 1083.06   86.13
  -2  -1   6 1038.69   85.82
  -2  -1   6 1096.98   86.08
  -2   1   6 1186.45   86.33
  -2   1   6 1132.35   86.76
   2  -1  -6 1192.92   86.77
   2   1  -6 1047.45   86.43
  -2   1   6 1128.47   86.02
   2  -1  -6 1176.37   86.61
   2   1  -6 1068.73   85.97
   2  -1  -6 1093.82   86.17
   5   2   2  370.69   27.58
  -5  -2  -2  365.54   27.61
   5   2   2  352.75   28.78
   5  -2   2  332.49   28.49
   5  -2   2  348.10   27.45
  -5   2  -2  352.39   28.21
  -5  -2  -2  360.02   28.13
  -5   2  -2  356.31   27.45
   5  -2   2  313.97   27.41
  -5   2  -2  287.59   27.50
  -5  -2  -2  343.98   28.03
  -5  -2  -2  365.44   27.41
   8   0  -3   -4.67    5.05
   8   0  -3    1.24    5.77
   8   0  -3   -0.40    2.27
  -8   0   3    1.30    3.47
  -8   0   3    0.65    3.81
  -8   0   3    4.17    4.33
   0  -2   5   12.59    5.33
   0   2  -5    9.83    3.02
   0  -2   5   13.03    2.96
   0  -2   5    9.72    2.83
   0   2   5    7.65    6.28
   0  -2  -5    8.49    4.65
   0   2   5   14.24    4.89
   0   2  -5   11.76    3.45
   0  -2  -5   11.44    4.20
   0   2  -5   13.90    3.29
   0   2   5   19.95    6.89
   0  -2  -5   14.35    5.46
   5   0  -6   22.47    2.46
  -5   0   6   24.85    4.97
   5   0  -6   21.84    4.66
   5   0  -6   19.99    4.84
  -5   0   6   27.69    6.09
   5   0  -6   50.03    2.97
  -5  -3   1  100.39    8.73
  -5   3   1   99.47   10.77
   5   3  -1  106.18    8.87
   5   3  -1   99.87   10.20
   5  -3  -1  115.78   12.03
  -5  -3   1  113.47    9.04
  -5   3   1  105.19    8.98
  -5  -3   1  109.47    9.10
   5  -3  -1  111.28    9.48
   5  -3  -1  110.79    8.89
  -5   3   1   97.90   10.27
   7   0   1   -5.77    6.20
  -7   0  -1    0.82    3.20
  -7   0  -1   -2.52    3.82
   7   0   1    0.72    5.76
   7   0   1   -1.74    2.82
  -4   0  -4  357.60   28.25
   4   0   4  372.61   28.78
  -4   0  -4  344.67   29.02
   4   0   4  358.43   28.22
  -4   0  -4  344.24   28.32
   4   1  -6   85.07    8.91
   4  -1  -6  117.31   10.28
  -4  -1   6   91.43    8.38
   4   1  -6   76.44    9.42
   4   1  -6   84.72    8.55
  -4   1   6  229.25   10.95
   4   1  -6   77.56    9.15
  -4   1   6  101.60    8.32
  -4   1   6  192.88   11.59
   4  -1  -6  143.02    8.63
   4  -1  -6  161.69   10.43
  -4  -1   6   77.80    8.96
   5   3  -2 1367.56  107.91
  -5  -3   2 1320.23  107.87
  -5   3   2 1528.85  108.11
   5  -3  -2 1411.52  108.46
   5   3  -2 1453.79  108.43
  -5   3   2 1414.18  109.08
   5   3  -2 1313.69  108.06
   5  -3  -2 1374.56  109.22
  -5   3   2 1483.93  108.58
   5  -3  -2 1428.99  107.99
  -4   2  -3  455.05   37.82
  -4  -2  -3  497.76   38.06
  -4   2  -3  484.98   38.01
  -4  -2  -3  486.18   38.45
  -4   2  -3  466.28   38.39
   4   2   3  514.05   38.00
  -4  -2  -3  517.31   37.89
  -4  -2  -3  441.27   38.34
   4  -2   3  444.77   37.83
  -6   1  -2   77.20    9.59
  -6   1  -2   93.08    9.23
  -6  -1  -2   89.77    8.28
   6  -1   2   96.86    8.21
   6   1   2   94.26    9.39
   6  -1   2   94.53   10.65
   6   1   2  100.13    8.32
  -6  -1  -2   96.08    8.46
   6  -1   2   78.41    8.73
   6   1   2  102.41   11.28
  -6  -1  -2   92.51    9.98
  -5   1  -3  278.61   25.14
   5  -1   3  316.10   25.80
  -5  -1  -3  322.28   24.53
   5   1   3  315.94   24.95
   5   1   3  301.08   25.81
  -5  -1  -3  302.28   25.41
   5   1   3  302.34   24.51
   5  -1   3  306.36   24.47
  -5   1  -3  316.82   24.58
   5  -1   3  297.46   24.75
  -5   1  -3  306.62   24.89
  -2  -3   4 1053.77   78.75
  -2   3   4  870.48   78.80
   2   3  -4 1186.53   78.66
   2  -3  -4  864.72   78.84
  -2  -3   4 1134.07   78.36
   2  -3  -4  825.73   78.94
  -2   3   4  897.10   78.53
   2   3  -4 1064.20   78.38
  -2   3   4  911.54   78.96
  -2  -3   4 1027.53   78.38
   2  -3  -4  882.74   78.30
   2   3  -4 1089.23   78.54
  -7   0   5   -0.52    3.64
  -7   0   5   -0.99    4.99
   7   0  -5    0.45    2.86
  -7   0   5   -1.37    3.92
   7   0  -5   -1.14    3.40
   7   2  -2   91.02    7.39
  -7  -2   2   88.93    8.21
  -7  -2   2   93.07    7.36
   7   2  -2   91.46    9.34
   7  -2  -2   88.92    7.64
  -7   2   2   84.09    8.03
   7  -2  -2   99.63   11.15
   7  -2  -2   87.98    8.11
   7   2  -2   88.20    8.09
   8   0  -1    0.82    5.91
   8   0  -1   -1.09    5.95
  -8   0   1   -0.98    2.89
  -8   0   1    0.78    4.52
  -8   0   1    0.39    5.32
   8   0  -1   -0.97    2.66
  -2  -1  -5   82.34    8.51
  -2   1  -5   90.78    8.50
  -2   1  -5   91.33    8.12
   2   1   5   89.43    9.63
  -2  -1  -5   86.79    8.26
   2  -1   5   83.58    7.98
  -2  -1  -5   75.64    9.31
  -2  -1  -5   94.47    9.72
  -2   1  -5   93.32    8.26
   2   1   5   96.18    8.53
  -1   3   4  255.72   32.09
   1   3  -4  440.65   32.46
   1  -3  -4  139.86   31.59
  -1  -3   4  362.31   31.61
  -1   3   4  164.62   31.97
  -1   3   4  145.15   32.40
  -1  -3   4  726.12   32.01
   1   3  -4  699.84   31.93
   1   3  -4  429.49   31.76
  -6  -2  -1   -0.97    3.17
   6   2   1   -3.71    2.94
  -6  -2  -1   -3.10    3.08
  -6   2  -1   -0.47    3.52
  -6   2  -1    0.18    5.68
   6  -2   1    5.51    6.51
   6  -2   1    1.30    2.94
   6  -2   1   -0.39    3.14
   6   2   1   -9.32    7.80
   6   2   1   -4.96    4.05
  -6  -2  -1   -5.32    4.58
   5   2  -5   49.99    4.63
   5  -2  -5   39.63    6.53
   5   2  -5   58.17    4.29
  -5   2   5   50.26    6.67
   5   2  -5   49.87    4.53
   5   2  -5   54.58    4.81
  -5   2   5   35.50    4.55
  -5   2   5   43.57    6.90
   5   2  -5   50.26    4.50
  -5  -2   5   56.59    4.64
  -1   1   6  267.53   19.47
  -1  -1   6  236.13   19.61
  -1  -1   6  230.38   19.29
   1  -1  -6  236.84   19.47
   1   1  -6  240.34   19.30
   1  -1  -6  254.25   20.21
   1   1  -6  231.22   19.30
   1  -1  -6  238.31   19.81
  -1  -1   6  236.15   19.06
   1   1  -6  242.82   19.46
   1  -1  -6  234.43   19.81
  -3   3   4    0.12    3.29
   3  -3  -4    6.58    4.70
   3   3  -4    3.15    2.02
  -3   3   4    6.30    5.70
  -3  -3   4    5.28    3.73
   3   3  -4    1.32    2.69
  -3   3   4    4.26    5.33
   3   3  -4    2.64    2.35
  -3   3   4    6.69    1.74
  -3  -3   4   18.20    1.97
   3   3  -4   13.57    3.13
   3  -3  -4   20.04    4.15
  -2   3  -3  747.57   61.62
   2   3   3  743.11   62.13
  -2   3  -3  880.02   61.64
  -2  -3  -3  689.54   61.65
   2   3   3  702.69   61.77
   2  -3   3  876.93   62.39
  -2   3  -3  900.03   62.33
  -2  -3  -3  726.44   61.87
  -2  -3  -3  722.14   62.00
   2  -3   3  783.02   61.54
   2  -3   3  922.80   61.65
   2   3   3  718.12   61.99
   0   0  -6  171.13   16.12
   0   0  -6  184.88   15.79
   0   0  -6  202.25   15.58
   0   0   6  188.30   15.44
   0   0  -6  182.29   16.49
   0   0   6  200.98   15.75
  -7  -2   1  706.47   52.20
  -7  -2   1  704.97   52.73
   7   2  -1  667.40   53.15
   7   2  -1  663.86   52.20
   7  -2  -1  632.29   53.38
   7  -2  -1  656.65   52.33
  -7   2   1  622.55   52.52
   7   2  -1  705.42   52.56
  -7  -2   1  651.97   52.27
   7  -2  -1  638.52   52.42
  -8  -1   2  953.63   71.43
  -8  -1   2  885.92   71.85
  -8  -1   2  919.72   71.65
   8   1  -2  890.44   71.82
   8  -1  -2  956.89   71.61
  -8   1   2  862.30   71.88
  -8   1   2  854.03   72.17
   8   1  -2  968.38   72.22
   8  -1  -2  962.51   72.36
  -8   1   2  978.80   71.77
   8   1  -2  893.33   71.39
   8  -1  -2  873.98   71.53
  -5   3   0  147.75   12.86
   5   3   0  166.78   12.92
  -5  -3   0  152.43   12.70
   5   3   0  151.66   14.09
   5  -3   0  149.69   14.91
   5  -3   0  177.90   12.88
  -5   3   0  135.73   14.19
  -5  -3   0  164.27   13.27
  -5  -3   0  158.17   13.15
   5  -3   0  145.39   12.99
  -5   3   0  159.54   13.52
  -5  -3   0  158.24   13.03
   7  -2  -3  237.38   19.91
  -7  -2   3  280.78   17.84
   7   2  -3  178.53   17.41
   7   2  -3  213.55   17.26
   7   2  -3  266.92   18.42
  -7   2   3  242.95   17.73
  -7  -2   3  219.18   17.29
  -7  -2   3  203.45   17.32
   7  -2  -3  264.27   17.51
   7  -2  -3  254.46   18.18
  -7   2   3  269.20   18.60
   8  -1  -3  363.83   28.99
   8   1  -3  379.16   29.74
  -8  -1   3  360.63   29.25
  -8   1   3  356.10   29.39
  -8   1   3  325.22   29.78
   8  -1  -3  357.53   30.23
   8   1  -3  373.35   29.41
  -8  -1   3  396.85   28.99
   8  -1  -3  331.84   29.08
   8   1  -3  370.81   28.85
  -8  -1   3  393.67   29.27
  -8   1   3  377.43   29.50
   5   1  -6 1449.85  110.26
   5  -1  -6 1474.18  110.47
   5  -1  -6 1377.30  110.55
   5   1  -6 1393.11  109.96
  -5  -1   6 1378.88  110.11
  -5   1   6 1493.04  110.45
   5   1  -6 1371.05  110.05
   5   1  -6 1410.02  110.19
  -5   1   6 1460.78  110.62
   5   1  -6 1414.94  109.93
  -8   0   4  335.48   27.40
   8   0  -4  340.91   28.11
   8   0  -4  336.50   27.12
  -8   0   4  312.78   27.68
   8   0  -4  376.23   27.40
  -8   0   4  347.53   27.16
  -5   3   3  148.81   14.96
  -5   3   3  152.34   14.58
  -5   3   3  172.77   13.66
   5   3  -3  159.71   14.15
   5  -3  -3  177.76   13.55
   5  -3  -3  160.54   14.62
  -5   3   3  172.63   15.86
   7  -1   1    0.85    6.42
   7  -1   1    1.16    3.90
   7   1   1   -0.78    2.79
  -7  -1  -1    1.14    3.08
  -7  -1  -1   -1.05    3.12
   7  -1   1    0.24    3.00
   7   1   1   -3.39    7.87
   7   1   1    1.97    5.33
  -4   1  -4  170.48   16.40
   4  -1   4  190.59   17.14
   4  -1   4  198.36   15.65
  -4   1  -4  182.76   15.97
   4   1   4  201.01   16.20
  -4  -1  -4  175.32   16.78
  -4   1  -4  206.65   15.87
   4   1   4  194.90   15.76
   0   3   4   47.77    7.91
   0  -3   4   52.22    7.33
   0  -3   4   50.16    4.95
   0   3   4   53.48    6.97
   0   3  -4   62.19    5.32
   0   3   4   45.17    6.85
   0  -3  -4   36.28    5.27
   0   3  -4   37.36    6.22
   0   3  -4   57.71    5.17
  -7   1   5    1.53    4.42
   7   1  -5    3.29    2.43
  -7  -1   5   -1.80    3.23
   7  -1  -5    2.92    3.94
  -7  -1   5   16.52    3.78
  -7  -1   5    0.19    2.79
  -7   1   5    1.35    5.81
  -7   1   5    2.60    4.10
   7   1  -5    0.06    3.52
   3   2   4  238.43   23.09
   3  -2   4  262.23   22.91
  -3  -2  -4  255.12   22.30
   3   2   4  291.90   22.07
  -3   2  -4  275.70   21.94
  -3   2  -4  288.17   21.80
  -3   2  -4  256.74   22.03
   0  -4   0  374.79   29.51
   0   4   0  373.76   29.69
   0   4   0  386.59   30.59
   0   4   0  340.32   29.77
   8   1  -1    0.33    2.38
   8  -1  -1   -1.74    3.60
  -8  -1   1    5.83    4.77
  -8  -1   1    4.98    3.26
  -8  -1   1    4.29    2.59
  -8   1   1    5.15    5.64
  -8   1   1    3.26    3.58
  -8   1   1   -0.32    5.10
   8  -1  -1   -4.14    6.66
   8  -1  -1    0.81    2.91
   8   1  -1    1.10    7.31
   8   1  -1   -5.46    5.35
  -6   0   6   27.24    4.48
   6   0  -6   27.66    4.31
   6   0  -6   20.46    4.57
  -6   0   6   23.71    5.05
   1  -2   5   71.82    8.38
   1  -2   5   66.97    6.24
  -1   2  -5   72.59    6.60
  -1  -2  -5   52.48    7.28
  -1   2  -5   64.90    6.59
   1   2   5   65.13    8.78
  -1   2  -5   63.05    6.78
   1  -2   5   62.68    6.25
  -1  -2  -5   82.21    7.49
  -1  -2  -5   75.98    6.90
   1   2   5   74.59    7.44
  -1  -2  -5   88.03    8.19
  -4   3   4  374.35   32.21
  -4   3   4  378.99   31.10
  -4   3   4  380.85   30.99
  -4   3   4  386.89   30.27
   4   3  -4  402.11   30.31
  -4  -3   4  355.39   30.26
   4   3  -4  382.97   30.33
   4   3  -4  369.83   30.10
  -4   3   4  417.36   30.17
   4  -3  -4  371.26   31.07
   4   3  -4  378.60   30.12
   1   4   0  147.33   16.52
  -1   4   0  250.78   17.26
  -1  -4   0  152.42   16.56
  -1   4   0  348.34   17.04
   1   4   0  175.39   17.59
   1   4   0  142.96   16.60
   1  -4   0  319.59   16.94
   1   4   0  148.54   16.02
   0  -1  -6   17.36    5.55
   0   1   6   16.08    5.09
   0  -1   6   23.54    3.44
   0  -1   6   19.46    4.73
   0  -1  -6   24.04    5.89
   0   1  -6   13.34    4.00
   0   1  -6   21.36    3.90
   0   1  -6   21.59    3.99
   0  -1  -6   21.98    4.97
   0  -1   6   24.29    3.32
   0  -1  -6   18.10    4.48
   0   4   1   93.53   10.26
   0   4   1   72.74   10.31
   0   4  -1   90.04    8.99
   0   4   1   70.64    9.26
   0   4  -1   87.12    8.84
   0  -4   1  196.42   12.99
   0  -4  -1   54.05   10.03
   0   4   1   61.23   11.27
   0   4  -1  117.09    9.94
   1  -4  -1  332.09   31.28
  -1   4   1  379.73   32.07
  -1  -4   1  406.44   31.00
  -1   4   1  337.21   30.71
   1   4  -1  453.26   30.87
  -1   4   1  361.52   30.81
   1   4  -1  459.84   30.95
   1   4  -1  495.48   31.79
  -1   4   1  317.78   31.33
   1   4  -1  415.95   31.09
   1   4  -1  388.98   31.19
  -1   4   1  345.86   31.23
  -8   0   0  139.73   12.47
  -8   0   0  147.47   11.69
  -8   0   0  137.73   13.23
   8   0   0  136.50   11.61
   8   0   0  135.16   13.02
   8   0   0  143.26   13.39
   3   0   5   -5.76    5.15
  -3   0  -5   -1.87    3.73
  -3   0  -5   -7.65    6.09
  -3   0  -5   -4.32    3.83
   3   0   5    1.16    4.02
   3   0   5   -2.19    3.25
   7  -2   0    0.30    3.02
   7  -2   0    7.06    3.08
   7   2   0    2.53    7.43
  -7   2   0   -4.90    4.01
  -7   2   0   -1.13    5.80
   7   2   0    3.27    4.30
   7  -2   0   -0.92    6.98
   7   2   0   -5.25    2.83
  -7  -2   0   -6.35    3.17
  -7  -2   0   -2.09    2.64
   8   1  -4   11.98    2.06
  -8   1   4    9.88    3.81
   8  -1  -4    2.59    3.52
   8   1  -4    6.41    5.01
   8  -1  -4    8.67    7.32
   8  -1  -4    2.17    1.98
  -8   1   4   -1.79    5.67
  -8   1   4   -1.96    4.49
  -8  -1   4    2.48    3.12
  -8  -1   4    9.22    3.75
  -8  -1   4    8.70    2.76
  -4  -3  -2  100.28    9.30
  -4   3  -2  104.88   10.81
  -4  -3  -2  110.29    9.89
  -4   3  -2  114.06    9.60
  -4  -3  -2  100.93    9.41
   4  -3   2  118.09   11.95
   4  -3   2  110.08    8.92
  -4  -3  -2   91.35    9.02
   4   3   2   94.21    9.30
  -4   3  -2   91.55    8.88
  -7   2   4  635.25   51.28
   7   2  -4  685.59   51.69
   7  -2  -4  650.31   51.13
  -7   2   4  719.74   52.02
  -7   2   4  675.15   52.53
   7  -2  -4  716.06   51.84
  -7  -2   4  636.89   51.30
  -7   2   4  645.97   51.73
  -6   2   5  661.05   42.24
  -6   2   5  665.40   42.33
   6   2  -5  634.88   41.48
  -6  -2   5  551.02   41.30
  -6   2   5  594.69   43.22
  -6  -2   5  413.37   41.33
   6  -2  -5  645.33   42.34
   6   2  -5  633.79   41.70
  -6   2   5  474.46   41.31
   1  -4   1   77.56    6.89
  -1  -4  -1   75.96    6.97
  -1   4  -1   80.58    7.19
   1   4   1   67.93   10.13
   1  -4   1   86.99    7.44
   1   4   1   85.85    8.63
   1   4   1   86.79    8.97
   1  -4   1   76.70   10.17
  -1   4  -1   94.88    9.12
  -1  -4  -1   70.47    8.11
  -1   4  -1   75.16    8.11
  -2   4   1  176.19   10.65
   2   4  -1   45.05    7.37
   2   4  -1   49.65    6.73
   2   4  -1   40.97    8.25
   2   4  -1   41.98    7.46
   2  -4  -1   96.96    8.52
  -2   4   1  126.83    9.16
  -2   4   1   72.73    6.78
  -2  -4   1   49.18    7.21
   2   4  -1   42.23    7.27
  -1   0  -6 1267.14   97.20
  -1   0  -6 1201.94   97.34
   1   0   6 1228.89   97.00
  -1   0  -6 1252.14   97.01
  -1   3  -4  300.53   26.33
  -1  -3  -4  299.96   25.90
   1   3   4  324.38   26.83
  -1   3  -4  377.23   25.83
  -1   3  -4  319.73   25.79
   1  -3   4  327.60   25.80
   1   3   4  275.59   26.36
   1  -3   4  351.54   26.90
   1   3   4  308.50   26.24
  -2   4   0   21.11    5.25
   2   4   0    9.87    4.06
   2  -4   0   14.47    2.64
  -2   4   0   28.77    6.63
  -2  -4   0   13.34    4.10
   2   4   0    3.21    6.28
   2  -4   0   17.46    3.63
   2   4   0   12.90    4.59
   2  -4   0   10.37    7.90
   2   4   0    9.74    4.27
  -6   1   6  276.56   22.57
   6   1  -6  248.25   21.54
  -6  -1   6  272.82   21.76
   6  -1  -6  259.99   22.17
   6  -1  -6  268.75   22.43
  -6   1   6  286.27   22.32
   6   1  -6  261.24   21.89
   6   1  -6  297.84   21.54
  -6  -1   6  259.64   22.12
   6   1  -6  284.47   21.81
   5  -3   1 1044.82   83.29
  -5  -3  -1 1121.49   83.48
  -5   3  -1 1017.69   83.49
  -5   3  -1  944.06   84.06
  -5  -3  -1 1111.20   83.64
  -5  -3  -1 1081.44   83.62
  -5  -3  -1 1060.92   83.26
   5   3   1 1093.54   83.38
   5   3   1 1051.47   83.93
  -6   3   2    0.25    5.32
   6  -3  -2   -1.25    3.72
   6  -3  -2   -1.20    2.10
  -6   3   2   -0.94    2.41
   6  -3  -2   -5.05    8.57
  -6   3   2   -6.50    6.52
   6   3  -2    0.99    1.72
   6   3  -2   -5.51    5.03
  -6  -3   2   -2.88    2.82
  -6  -3   2    1.70    1.30
  -6  -3   1  464.70   35.56
   6  -3  -1  473.14   35.56
  -6   3   1  396.26   36.11
   6   3  -1  417.91   36.23
   6   3  -1  474.95   35.48
   6  -3  -1  417.99   35.75
  -6   3   1  418.03   36.74
  -6  -3   1  477.14   35.68
  -6  -3   1  455.64   35.39
   6  -3  -1  418.47   37.00
  -6   3   1  431.35   35.65
   3   3   3 1951.39  161.57
  -3   3  -3 2018.17  161.09
  -3  -3  -3 2093.60  161.57
   3  -3   3 2061.55  161.07
   3   3   3 2047.26  161.25
  -3   3  -3 2118.56  161.75
  -3  -3  -3 2019.63  161.33
   3  -3   3 2078.34  161.14
   3  -3   3 2118.92  161.76
  -3  -3  -3 2128.67  161.40
  -3   3  -3 2098.00  161.20
  -3  -2   6   24.88    5.49
  -3  -2   6   46.36    4.55
   3   2  -6   39.43    4.58
  -3   2   6   44.23    5.96
   3   2  -6   52.05    4.87
   3  -2  -6   58.18    4.55
   3   2  -6   39.75    4.39
   3  -2  -6   36.32    6.50
  -3  -2   6   44.40    4.20
   3  -2  -6   40.09    6.30
  -6   0  -3  -10.08    7.15
   6   0   3  -18.01    7.80
   6   0   3  -10.51    6.09
   6   0   3   -3.75    3.69
   1   4  -2    3.90    4.05
  -1   4   2   11.53    2.45
   1   4  -2    2.34    2.17
  -1   4   2   65.82    8.17
   1  -4  -2   28.72    5.05
  -1   4   2   14.52    5.44
  -1   4   2   33.88    5.27
   1   4  -2    2.50    2.93
  -1  -4   2    4.41    6.20
  -1   4   2   47.40    3.76
  -1  -4   2    5.61    2.75
   1   4  -2    8.38    5.21
  -2  -2   6   16.07    2.99
  -2  -2   6   13.45    2.64
   2   2  -6   15.60    3.17
   2  -2  -6   25.91    6.13
  -2  -2   6   15.45    4.75
   2   2  -6   13.99    3.03
   2   2  -6   14.30    3.43
   2  -2  -6   22.28    5.30
  -2   2   6   14.49    5.38
   2  -2  -6   18.23    3.72
  -8  -1   0  178.75   12.84
  -8   1   0  143.58   14.21
   8  -1   0  155.48   14.76
   8  -1   0  153.87   13.21
   8   1   0  163.70   12.80
  -8   1   0  153.99   13.03
   8  -1   0  150.44   12.89
  -8   1   0  148.53   13.94
  -8  -1   0  142.72   13.97
   8   1   0  162.75   14.13
  -8  -1   0  145.03   12.97
   8   1   0  143.41   14.99
  -5   3   4  586.02   50.76
   5  -3  -4  678.85   51.64
  -5   3   4  643.18   52.43
  -5   3   4  627.32   51.55
   5   3  -4  660.95   50.88
   5   3  -4  575.45   50.98
  -5   3   4  640.14   51.45
  -5   3   4  766.50   50.88
   3  -1   5  306.39   26.55
  -3  -1  -5  384.79   27.08
  -3   1  -5  322.24   26.53
   3   1   5  312.34   27.36
  -3  -1  -5  327.51   27.48
  -3   1  -5  327.43   26.66
  -3  -1  -5  341.53   28.06
  -3   1  -5  302.68   26.94
  -3  -1  -5  365.41   27.09
   3   1   5  339.15   26.93
  -8   0   5   -0.75    4.95
  -8   0   5   -2.58    3.56
   8   0  -5   -0.14    3.02
   8   0  -5    2.28    3.40
  -8   0   5    2.05    3.80
  -7   0  -2  488.45   45.28
   7   0   2  551.68   45.12
   7   0   2  605.83   45.48
  -7   0  -2  604.74   44.58
  -7   0  -2  534.18   44.76
   7   0   2  582.11   44.55
   0  -4   2   44.41    8.14
   0   4   2   70.59    7.50
   0  -4   2   53.94    5.55
   0  -4  -2   59.54    5.47
   0   4  -2   45.85    6.45
   0   4  -2   62.39    5.60
   0   4   2   61.05    6.16
   0  -4  -2   58.59    6.87
   0  -4   2   50.76    5.27
   0   4   2   62.61    7.40
   0   4  -2   54.30    7.51
  -4  -2   6  571.43   45.95
   4   2  -6  596.98   46.14
   4  -2  -6  652.57   46.72
  -4   2   6  574.83   46.63
  -4   2   6  559.82   46.15
   4  -2  -6  624.37   46.85
   4   2  -6  572.49   45.96
   4   2  -6  521.80   46.04
   4   2  -6  603.26   46.35
  -4  -2   6  598.61   46.17
   4  -2  -6  618.42   45.85
   2  -4  -2   28.92    5.57
  -2   4   2   23.44    6.04
   2   4  -2   34.39    3.55
   2   4  -2   38.42    5.69
   2   4  -2   29.81    4.25
   2   4  -2   34.87    4.72
  -2  -4   2   37.86    3.79
  -2   4   2   27.80    5.58
  -2   4   2   25.16    3.79
  -2   4   2   20.17    7.52
  -2   4   2   24.70    3.22
   2   4  -2   30.43    4.02
  -6  -2  -2   95.34    8.28
  -6  -2  -2   87.86    9.18
   6  -2   2   81.04    8.17
   6   2   2   96.02    8.64
   6  -2   2   82.39    8.05
   6   2   2  108.30   11.30
   6  -2   2   88.90   10.41
  -6   2  -2   85.81    8.20
  -6   2  -2   97.61    9.63
  -6  -2  -2   95.58    8.07
  -6   3   3    5.00    6.72
   6  -3  -3    9.79    1.91
  -6   3   3    7.20    5.49
  -6   3   3   10.39    2.38
  -6  -3   3    5.47    2.48
   6   3  -3    2.99    4.35
   6  -3  -3    7.30    4.41
  -5   2  -3   12.77    5.07
  -5   2  -3    6.31    3.75
   5  -2   3   -0.56    6.90
  -5  -2  -3    9.69    3.51
  -5  -2  -3    4.28    4.89
   5   2   3   14.34    4.36
  -5  -2  -3   10.16    3.95
   5  -2   3   10.67    3.57
  -5   2  -3   14.81    3.64
  -5  -2  -3    8.72    5.73
   5  -2   3    7.53    3.05
  -2  -4  -1 1938.92  149.05
   2  -4   1 1974.84  148.95
   2   4   1 1882.79  149.35
  -2  -4  -1 2024.80  149.37
   2  -4   1 1879.49  149.78
  -2   4  -1 1844.98  149.29
  -2  -4  -1 1904.05  149.21
   2  -4   1 1864.82  149.10
  -2   4  -1 1861.89  149.69
   2   4   1 1827.92  149.21
  -7   0   6  141.56    9.15
   7   0  -6   87.73    7.58
  -7   0   6  152.09    8.85
   7   0  -6  129.25    8.87
   7   0  -6   89.41    7.35
  -7   0   6  133.81   10.37
  -1   1  -6 1219.10   94.12
  -1  -1  -6 1133.49   94.56
   1  -1   6 1191.45   94.07
  -1  -1  -6 1227.07   94.45
   1  -1   6 1192.25   94.14
   1   1   6 1187.39   94.35
   1  -1   6 1222.65   94.44
  -1  -1  -6 1210.85   94.81
   1   1   6 1255.97   94.33
  -1  -1  -6 1195.29   94.20
  -1   1  -6 1224.68   94.27
  -1   1  -6 1175.95   94.31
   5   0   4  954.31   72.63
  -5   0  -4  860.06   72.73
  -5   0  -4  921.45   72.22
   5   0   4  924.11   72.10
  -5   0  -4  926.40   72.08
  -3  -4   1   74.63    6.88
   3   4  -1   75.19    7.95
   3   4  -1   59.12    7.01
  -3   4   1   64.90    8.10
  -3   4   1   79.28    6.48
   3  -4  -1   74.59    6.18
   3  -4  -1   61.54    7.18
  -3   4   1   62.92    8.90
   3   4  -1   70.17    7.11
   3  -4  -1   62.89   10.50
   3   4  -1   64.19    6.88
  -2   2  -5   61.98    6.48
   2  -2   5   64.54    6.12
  -2   2  -5   65.59    6.63
   2  -2   5   65.21    6.03
   2   2   5   74.85    7.09
   2  -2   5   72.96    8.78
  -2   2  -5   64.03    6.28
   2   2   5   56.14    8.82
  -2  -2  -5   60.97    7.19
  -2  -2  -5   60.50    7.47
  -2  -2  -5   50.36    7.99
   1  -2  -6   35.05    6.84
   1   2  -6   36.29    4.52
  -1  -2   6   45.64    4.28
  -1  -2   6   36.93    4.35
   1  -2  -6   37.35    5.09
   1  -2  -6   33.80    6.04
   1   2  -6   37.58    4.35
   1   2  -6   36.01    4.40
  -1   2   6   35.60    6.04
  -1  -2   6   36.52    6.10
  -1   2   6   32.40    7.71
  -1   2   6   44.09    6.84
   3   0  -7    1.39    4.22
  -3   0   7   -2.31    1.85
  -3   0   7   -3.44    4.13
   3   0  -7   -6.07    3.75
   3   0  -7   -1.09    4.23
   3   0  -7   -2.99    5.05
  -6  -3   0   -7.52    2.98
   6   3   0   -2.91    6.82
  -6  -3   0   -7.10    4.26
   6  -3   0    1.06    2.74
  -6  -3   0   -6.55    3.64
   6  -3   0   -3.90    7.46
  -6   3   0   -0.29    2.92
   6   3   0   -8.92    3.57
   6  -3   0   -1.59    3.09
  -6   3   0    0.20    5.84
  -6   3   0   -0.32    4.49
  -6  -3   0   -6.30    4.49
   2   3  -5  350.81   19.34
  -2  -3   5  360.96   20.15
  -2  -3   5  348.43   19.35
  -2   3   5  144.50   19.93
   2  -3  -5  146.84   19.96
   2  -3  -5  137.88   20.00
  -2   3   5  157.96   20.31
  -2   3   5  122.78   19.66
   2   3  -5  233.36   19.39
   2  -3  -5  159.20   19.17
  -2  -3   5  231.21   19.22
   2   3  -5  295.49   19.54
   9   0  -3   -2.71    2.52
  -9   0   3   -0.20    4.21
  -9   0   3    0.16    3.67
   9   0  -3    3.73    5.96
  -9   0   3   -0.93    4.78
   9   0  -3    0.47    5.66
  -9   0   2   41.74    6.27
  -9   0   2   35.70    4.71
   9   0  -2   40.50    6.72
   9   0  -2   28.88    7.11
   9   0  -2   41.13    4.17
  -9   0   2   36.38    6.04
  -3   4   0  271.60   19.10
   3   4   0  227.18   19.50
   3  -4   0  233.80   18.86
   3   4   0  197.08   19.56
   3   4   0  202.75   19.25
  -3   4   0  234.79   20.58
  -3  -4   0  234.20   19.03
  -3  -4   0  242.77   19.41
   3  -4   0  212.04   20.89
  -3   4   0  250.06   19.80
   3  -4   0  241.48   19.30
   4   0  -7    3.42    4.80
   4   0  -7    1.08    3.59
   4   0  -7   -2.07    3.46
  -4   0   7   -3.25    3.83
   4   0  -7   -3.08    4.40
  -4   0   7   -1.05    1.51
   6   1   3    2.31    3.26
   6   1   3   -7.33    5.66
  -6   1  -3   -1.96    6.09
  -6   1  -3   -4.78    3.92
   6  -1   3   -1.96    4.29
  -6  -1  -3    1.08    3.66
   6  -1   3   -2.64    7.51
   6   1   3    0.74    7.68
   6  -1   3   -0.55    3.21
  -6  -1  -3    5.16    6.42
  -6   1  -3   -4.91    4.61
  -6  -1  -3   -2.46    3.85
   3  -3  -5  242.30   24.71
   3  -3  -5  240.17   24.95
   3   3  -5  344.82   24.09
  -3  -3   5  326.22   24.45
   3   3  -5  328.06   24.28
   3   3  -5  334.26   23.95
  -3  -3   5  352.18   24.00
  -3  -3   5  281.70   23.97
  -3   3   5  275.74   24.84
   3  -3  -5  278.19   23.92
  -3   3   5  194.46   24.28
   8   2  -2  537.22   41.12
  -8  -2   2  539.59   41.63
   8  -2  -2  491.02   41.25
  -8  -2   2  545.07   41.08
  -8  -2   2  552.28   41.17
   8  -2  -2  543.98   42.64
  -8   2   2  537.91   41.77
   8  -2  -2  494.43   41.43
  -8   2   2  471.63   41.54
   8   2  -2  502.04   42.15
   8   2  -2  499.05   41.46
  -1  -4  -2  205.09   16.18
  -1   4  -2  173.82   16.61
   1  -4   2  192.69   15.53
   1   4   2  197.42   16.51
   1  -4   2  176.91   15.34
  -1  -4  -2  188.04   15.44
   1  -4   2  193.24   16.95
   1   4   2  191.88   16.08
  -1   4  -2  203.10   15.60
  -1   4  -2  163.91   15.90
   1   4   2  203.13   16.24
  -1  -4  -2  212.01   16.40
   2   0  -7   -0.65    5.35
   2   0  -7   -3.03    4.67
  -2   0   7   -1.09    2.38
   2   0  -7    2.58    4.14
   2   0  -7   -0.68    3.61
  -2   0   7    3.34    3.92
  -3   4   2  271.66   24.08
   3   4  -2  279.45   23.31
   3   4  -2  271.84   23.25
  -3   4   2  307.20   23.17
  -3   4   2  282.69   23.88
   3   4  -2  277.80   23.46
   3   4  -2  297.07   23.77
   3   4  -2  320.12   23.24
  -3   4   2  289.75   24.84
  -3   4   2  273.34   23.10
  -3  -4   2  295.01   23.13
  -8  -2   3   23.15    2.71
   8  -2  -3   25.91    8.09
   8   2  -3   26.86    2.55
   8  -2  -3   26.43    4.17
  -8  -2   3   36.12    3.94
  -8   2   3   25.56    4.23
   8   2  -3   32.21    5.61
  -8   2   3   29.28    6.71
   8   2  -3   19.05    3.61
   8  -2  -3   17.92    2.99
  -8   2   3   26.58    5.59
  -5   2   6  297.50   23.10
   5   2  -6  272.20   22.08
  -5   2   6  257.19   22.09
   5   2  -6  274.07   22.19
   5   2  -6  271.34   21.99
  -5   2   6  281.83   23.38
   5  -2  -6  288.37   23.27
   5   2  -6  288.54   22.31
  -5  -2   6  278.15   22.17
   5   2  -6  315.34   22.20
   5  -2  -6  283.51   22.91
   8  -1  -5    3.12    3.56
  -8  -1   5    8.24    3.65
  -8   1   5    4.18    4.24
  -8   1   5    9.78    5.79
   8  -1  -5    4.04    1.00
  -8  -1   5    4.02    1.87
   8   1  -5    3.72    2.15
  -8   1   5    5.14    4.86
   8   1  -5    5.34    4.30
  -8  -1   5   -1.45    2.93
  -8  -1   5   -1.77    3.15
  -7  -1  -2 1179.51   88.67
   7   1   2 1159.42   89.19
  -7  -1  -2 1181.50   88.81
   7  -1   2 1137.67   88.88
  -7  -1  -2 1144.70   89.39
   7  -1   2 1112.83   89.54
   7  -1   2 1085.53   88.69
   7   1   2 1111.75   89.46
   7   1   2 1093.93   88.67
  -1   3   5   12.57    5.68
   1  -3  -5   -6.51    5.79
   1   3  -5   40.53    4.16
   1   3  -5   41.60    3.96
  -1  -3   5   32.73    6.18
  -1  -3   5   52.66    3.98
   1  -3  -5    6.69    3.81
   1  -3  -5    5.20    5.39
  -1  -3   5   32.02    3.62
   1   3  -5   21.06    4.74
  -7  -2  -1    1.89    3.02
  -7   2  -1   -5.17    6.01
  -7   2  -1    9.24    3.78
  -7  -2  -1    4.05    5.11
   7   2   1    6.35    7.83
   7   2   1   -1.67    4.35
   7   2   1    2.97    2.67
  -7  -2  -1   -0.90    3.34
   7  -2   1    5.23    3.38
   7  -2   1   -1.45    3.09
  -4  -2  -4  109.15   11.62
  -4   2  -4  102.14   10.82
   4   2   4  110.78   12.68
  -4  -2  -4  108.70   11.24
  -4  -2  -4  121.97   10.79
  -4  -2  -4  136.98   10.48
   4   2   4  134.04   10.75
  -4   2  -4  127.72   10.39
  -4   2  -4  111.03   10.56
  -2   3  -4  606.41   47.55
  -2  -3  -4  561.59   47.22
  -2   3  -4  665.37   47.02
  -2  -3  -4  567.39   47.64
   2  -3   4  634.13   47.02
   2   3   4  559.44   47.85
  -2  -3  -4  602.29   47.48
  -2   3  -4  579.76   47.09
   2   3   4  574.25   47.32
   2   3   4  490.92   47.67
   2  -3   4  589.21   47.81
   8   0   1  -10.54    6.96
  -8   0  -1   -7.02    4.33
   8   0   1   -6.64    3.28
  -8   0  -1   -1.53    3.64
   8   0   1   -5.19    6.22
   7   2  -5  142.02    9.19
  -7   2   5  130.08    9.81
  -7   2   5  125.32   10.06
   7  -2  -5  113.89    9.77
   7   2  -5  129.38    8.28
  -7   2   5   83.04    7.93
  -7   2   5  124.47   11.20
  -7   1   6 1868.97  144.18
  -7   1   6 1938.86  144.09
   7   1  -6 1865.73  143.74
  -7  -1   6 1875.64  143.76
  -7   1   6 1787.38  144.77
   7   1  -6 1791.77  143.56
   7   1  -6 1860.20  143.81
  -7  -1   6 1890.07  143.92
  -7  -1   6 1761.87  144.09
   7  -1  -6 1881.90  144.19
   5   0  -7   -0.84    4.33
  -5   0   7    0.39    0.93
  -5   0   7   -3.28    4.01
  -5   0   7    1.08    5.41
   5   0  -7    0.21    4.01
   5   0  -7   -2.22    2.64
  -5  -1  -4  142.87   13.51
  -5   1  -4  139.43   12.31
   5   1   4  147.52   12.81
   5   1   4  148.18   12.05
   5  -1   4  145.24   12.01
  -5   1  -4  118.11   13.17
  -4  -3   5   21.27    3.67
   4  -3  -5   24.65    5.11
  -4   3   5   23.98    2.30
   4   3  -5   15.62    2.60
   4   3  -5   21.90    2.93
   4   3  -5   16.02    2.97
  -4   3   5   16.53    3.80
   4  -3  -5   21.71    5.67
   4   3  -5   19.31    2.41
   8  -2  -1   33.70    4.55
  -8  -2   1   39.67    4.00
   8  -2  -1   37.59    4.65
  -8   2   1   32.36    5.44
  -8  -2   1   41.05    5.45
   8  -2  -1   44.31    8.46
   8   2  -1   31.61    8.15
   8   2  -1   39.46    5.76
   8   2  -1   41.00    4.06
  -8  -2   1   37.42    4.23
  -9   0   4  945.54   77.86
  -9   0   4  932.27   78.25
   9   0  -4 1080.05   78.03
   9   0  -4  946.68   77.76
   9   0  -4 1082.51   78.58
  -9   0   4 1102.28   78.07
  -9   0   1   -2.31    3.12
   9   0  -1   -3.87    2.80
  -9   0   1   -1.66    5.91
   9   0  -1   -1.09    6.31
  -9   0   1   -1.29    4.88
   9   0  -1   -3.18    5.89
  -3   1   7  152.40   10.38
  -3  -1   7   96.55    9.53
  -3   1   7  111.62   11.68
   3  -1  -7  170.85   11.19
  -3  -1   7   92.97    8.88
   3  -1  -7  142.04   11.37
   3   1  -7   84.63   10.31
   3   1  -7   90.46    9.65
  -3   1   7  127.41    9.03
   3  -1  -7  160.63    9.99
   3   1  -7   83.29    9.31
   3   1  -7   78.00    9.04
  -2   0  -6    2.19    5.81
  -2   0  -6    1.99    3.98
   2   0   6    2.69    3.78
   9   1  -3   43.22    7.50
   9   1  -3   51.18    6.57
  -9  -1   3   52.04    5.86
  -9  -1   3   50.84    5.66
  -9  -1   3   46.92    5.05
   9  -1  -3   44.34    5.16
   9  -1  -3   60.53    8.86
   9   1  -3   47.70    4.65
  -9   1   3   40.77    7.12
   9  -1  -3   59.37    5.23
  -9   1   3   43.45    6.42
  -9   1   3   54.56    6.46
  -9   1   2   -1.23    6.69
   9  -1  -2   -3.35    7.88
  -9   1   2   -4.76    6.59
   9   1  -2  101.61    9.83
  -9  -1   2   35.90    6.89
  -9   1   2   -2.34    5.76
  -9  -1   2   85.50    6.54
  -9  -1   2  118.27    6.28
   0  -2  -6   -0.22    4.90
   0  -2  -6    9.46    4.62
   0  -2   6    5.94    2.79
   0  -2  -6   10.84    5.42
   0   2  -6    7.87    3.33
   0   2  -6   10.14    3.58
   0   2  -6    9.02    3.61
   0  -2   6    7.06    3.08
   0   2   6    4.53    6.37
   0  -2   6    7.67    5.66
   4   1  -7  304.03   26.27
   4  -1  -7  435.51   26.12
  -4  -1   7  292.23   25.74
  -4   1   7  323.48   27.33
  -4   1   7  321.31   25.75
   4  -1  -7  381.36   27.01
   4   1  -7  298.46   26.48
   4   1  -7  298.65   25.95
   4  -1  -7  419.83   26.89
   4   1  -7  312.11   26.09
  -4   1   7  423.39   26.84
  -4  -1   7  299.13   26.13
   1   4  -3  270.44   25.30
   1   4  -3  276.60   25.43
   1  -4  -3  300.69   26.17
   1   4  -3  318.94   26.05
  -1  -4   3  317.20   26.06
  -1  -4   3  355.78   25.25
  -1   4   3  282.53   26.23
   1  -4  -3  371.85   26.07
  -1   4   3  374.40   25.76
  -1   4   3  281.02   26.21
   6  -3  -4  115.38   11.85
  -6   3   4  112.09   12.86
  -6   3   4  136.38   10.56
   6   3  -4  132.15   11.09
   6   3  -4  138.32   10.59
  -6   3   4  121.48   10.45
   2   4  -3  412.96   38.60
  -2   4   3  617.92   38.41
  -2   4   3  455.81   38.92
   2   4  -3  497.82   38.27
  -2  -4   3  426.49   38.05
  -2  -4   3  509.91   38.81
  -2   4   3  529.98   38.88
  -2   4   3  709.96   40.57
   2   4  -3  397.05   38.24
  -2   4   3  513.63   38.12
  -1   0   7   -0.07    2.76
   1   0  -7   -0.76    4.00
   1   0  -7   -5.34    5.27
   1   0  -7   -2.76    3.79
  -1   0   7    1.86    4.01
   1   0  -7   -4.54    5.39
   3  -4   1  148.74   12.15
   3  -4   1  144.50   12.50
  -3  -4  -1  148.60   12.80
   3   4   1  135.27   13.31
  -3   4  -1  127.79   14.05
  -3  -4  -1  160.94   12.47
  -3  -4  -1  145.83   13.00
  -3   4  -1  142.86   13.06
   3   4   1  151.72   12.84
   3  -4   1  157.99   14.54
   4   0   5   -5.79    3.64
  -4   0  -5   -4.85    4.04
  -4   0  -5    0.99    6.72
   4   0   5   -2.85    4.40
  -5   3  -2  170.53   17.47
  -5  -3  -2  187.04   16.21
  -5  -3  -2  192.77   16.60
  -5  -3  -2  183.08   16.92
  -5  -3  -2  247.00   16.95
   5   3   2  197.87   16.41
   2  -1  -7   -0.10    4.56
  -2  -1   7   14.28    4.38
  -2   1   7   -0.11    4.70
   2   1  -7    1.17    2.96
   2  -1  -7    0.42    4.62
  -2  -1   7   -1.57    2.29
   2  -1  -7    1.92    4.13
   2  -1  -7   10.22    5.73
   2   1  -7    1.94    4.00
  -2   1   7   -2.42    2.89
   2   1  -7    7.89    3.81
   2   1  -7    0.16    5.35
   4  -4  -1   21.03    2.79
  -4  -4   1   18.05    3.18
   4   4  -1   20.89    5.51
  -4   4   1   13.46    7.08
   4   4  -1   20.74    4.33
   4   4  -1   15.72    3.76
  -4   4   1   21.61    5.53
  -4   4   1   20.94    2.99
  -4  -4   1   24.33    3.86
   4  -4  -1   24.88    8.26
   0   3  -5  206.48   15.78
   0   3  -5  187.29   16.12
   0   3   5  181.10   16.86
   0   3  -5  193.38   15.87
   0  -3  -5  197.14   16.04
   0  -3   5  202.34   17.00
   0  -3   5  187.60   15.77
   0  -3   5  197.46   15.75
  -2   4  -2  -16.53    6.44
   2  -4   2   -2.21    6.79
  -2  -4  -2   -3.54    4.31
   2   4   2   -4.87    4.77
  -2  -4  -2   -6.20    5.03
   2   4   2   -1.83    5.07
   2  -4   2   -5.98    3.01
  -2  -4  -2    2.88    2.79
  -2   4  -2   -0.90    2.71
   2   4   2   -5.45    5.66
  -2   4  -2   -3.61    4.39
   8  -2  -4  198.84   17.66
  -8   2   4  209.77   18.79
  -8  -2   4  207.56   17.17
   8   2  -4  214.09   17.87
   8  -2  -4  236.61   16.97
  -8   2   4  198.78   17.27
   8  -2  -4  196.50   19.60
  -8   2   4  199.00   18.12
  -4  -3  -3  401.43   31.01
   4   3   3  400.26   31.21
  -4  -3  -3  435.15   31.68
  -4   3  -3  373.41   30.99
   4  -3   3  371.14   32.02
  -4   3  -3  360.98   31.09
  -4  -3  -3  422.88   31.39
  -4  -3  -3  412.67   31.45
   4  -3   3  363.88   30.96
  -4   3  -3  392.88   31.92
   0   4  -3  365.25   27.92
   0   4  -3  382.30   28.62
   0   4   3  333.18   28.67
   0   4  -3  313.43   27.92
   0  -4  -3  317.12   28.51
   0  -4   3  346.52   28.69
   0  -4   3  362.38   27.74
   0  -4  -3  330.35   28.45
   0   4   3  329.77   28.41
   0   4   3  366.94   28.29
   0  -4  -3  357.10   27.77
   8  -1   1   97.25    9.74
   8   1   1  108.07    9.18
   8  -1   1   98.16    9.16
  -8   1  -1  109.72    9.39
   8   1   1  102.31   11.26
   8  -1   1  102.09   11.59
  -8   1  -1   94.19   10.56
  -8  -1  -1  113.46    9.45
  -8  -1  -1  115.12    9.38
   4   4  -2  159.03   12.41
   4   4  -2  144.56   12.92
  -4   4   2  150.00   14.77
   4   4  -2  143.35   12.64
  -4  -4   2  144.56   12.34
  -4   4   2  166.04   12.54
   4   4  -2  143.65   12.48
   5  -1  -7   19.36    1.82
   5  -1  -7   17.21    5.43
  -5  -1   7   35.67    4.06
  -5   1   7   10.56    5.31
  -5  -1   7   24.86    2.24
  -5   1   7   12.40    1.64
   5   1  -7   31.91    3.92
   5  -1  -7   26.32    5.40
   5   1  -7   56.52    3.04
  -5   1   7   10.77    6.27
   5   1  -7   33.14    4.99
   5   1  -7   24.75    4.26
  -3  -4   3   -4.55    2.71
   3   4  -3   -5.70    3.21
   3   4  -3   -2.35    4.53
   3   4  -3   -1.53    3.59
   3   4  -3   -3.06    2.72
   7  -3  -2  155.40   12.09
  -7   3   2  134.76   12.28
  -7  -3   2  145.37   12.42
   7   3  -2  142.25   13.32
   7   3  -2  150.89   12.05
  -7  -3   2  149.80   11.75
  -7   3   2  132.89   14.12
   7  -3  -2  151.23   12.66
   6   2  -6  396.08   30.03
   6   2  -6  359.06   29.77
   6  -2  -6  409.07   30.91
   6   2  -6  405.07   29.95
   6   2  -6  372.97   29.91
  -6   2   6  417.52   30.96
  -6  -2   6  375.70   29.87
   6   2  -6  379.54   29.88
  -6   2   6  392.05   30.73
  -4  -4   0  203.40   16.47
  -4   4   0  210.13   16.43
   4  -4   0  205.40   18.34
   4   4   0  208.61   17.04
  -4   4   0  190.42   17.25
  -4   4   0  164.17   17.95
   4   4   0  191.85   16.58
  -4  -4   0  202.06   16.60
   4  -4   0  197.84   16.21
  -4  -4   0  222.44   16.82
   6  -3   1  192.62   16.63
   6   3   1  220.14   16.84
   6  -3   1  195.92   16.81
  -6  -3  -1  216.48   16.68
  -6  -3  -1  219.00   17.41
  -6   3  -1  203.51   16.96
  -6  -3  -1  201.09   17.39
  -6  -3  -1  208.44   17.04
  -6   3  -1  188.58   18.16
   9   1  -4  121.50   11.24
  -9  -1   4  124.76   10.33
  -9  -1   4  118.66   10.51
  -9   1   4  116.20   11.76
  -9   1   4  120.47   10.76
  -9   1   4  129.83   11.07
   9  -1  -4  108.99   12.73
   9   1  -4  124.60   11.36
   9   1  -4  122.66    9.85
   9  -1  -4  112.21    9.99
  -9  -1   4  133.11   10.29
   9  -1  -4  114.30   10.40
   5   3  -5  291.28   19.46
   5   3  -5  237.37   19.11
   5   3  -5  210.89   19.19
  -5   3   5  284.90   22.22
  -5   3   5  280.39   19.48
   5  -3  -5  288.90   20.67
  -5   3   5  313.81   19.29
   5   3  -5  207.77   19.12
   5   3  -5  281.75   19.56
  -5  -3   5  224.82   19.22
   6   0  -7   -1.22    4.29
   6   0  -7   -0.38    0.94
  -6   0   7   -1.84    3.90
   6   0  -7   -0.40    3.83
   6   0  -7    0.44    1.61
  -6   0   7    0.50    5.14
   9   1  -1   62.25    6.00
  -9  -1   1   68.64    6.50
  -9  -1   1   65.84    7.80
   9   1  -1   63.15    8.17
   9  -1  -1   66.73    6.76
   9   1  -1   61.99    9.54
   9  -1  -1   68.15    9.31
  -9   1   1   56.94    8.25
   9  -1  -1   63.26    6.28
  -9   1   1   70.49    6.82
  -9  -1   1   69.73    6.08
  -9   1   1   67.55    8.30
   2  -1   6   89.26    8.83
   2   1   6   74.18    8.81
  -2  -1  -6   79.07    9.44
  -2  -1  -6   81.90    9.22
  -2  -1  -6   84.29    8.28
  -2   1  -6   65.55    8.45
  -2   1  -6   84.28    7.68
   2  -1   6   91.93    7.56
  -2   1  -6   78.23    7.70
  -7  -3   1   15.64    3.68
  -7  -3   1   15.31    3.17
   7   3  -1   15.28    3.25
  -7  -3   1   12.67    2.41
  -7   3   1    5.97    3.30
  -7   3   1   13.47    6.45
   7  -3  -1   11.65    2.86
   7  -3  -1   11.68    3.53
  -8   0   6  251.39   16.93
   8   0  -6  246.63   16.12
  -8   0   6  246.41   16.28
   8   0  -6  174.98   15.09
  -8   0   6  256.41   16.12
   8   0  -6  236.14   15.39
   1  -1  -7   39.36    6.43
  -1   1   7   31.58    4.77
  -1  -1   7   34.32    4.00
  -1  -1   7   39.08    5.53
   1   1  -7   35.08    4.79
   1   1  -7   37.57    4.68
   1   1  -7   40.49    5.07
   1  -1  -7   38.08    6.82
   1  -1  -7   35.02    5.82
   7  -3  -3   43.25    4.05
  -7   3   3   36.74    4.44
   7  -3  -3   37.73    5.74
   7   3  -3   46.35    6.29
  -7  -3   3   52.30    4.69
   8  -2   0   13.62    3.30
   8  -2   0   12.77    3.49
  -8  -2   0   15.04    3.13
   8   2   0   14.28    5.07
  -8  -2   0    6.53    3.21
   8   2   0    8.76    3.06
  -8   2   0    6.33    4.87
  -4   1  -5   30.71    6.26
   4  -1   5   29.60    4.24
   4   1   5   27.57    7.12
  -4  -1  -5   29.36    4.94
  -4   1  -5   29.85    4.80
   4   1   5   28.67    4.49
  -4  -1  -5   27.61    6.96
  -3   2  -5    8.82    3.64
   3  -2   5    5.27    3.12
  -3   2  -5    7.22    4.00
   3  -2   5    2.04    6.54
   3   2   5   -1.09    7.54
  -3  -2  -5    7.26    5.38
  -3   2  -5    3.87    3.67
  -1   4  -3   34.97    3.91
   1  -4   3   31.89    4.13
  -1  -4  -3   35.16    5.93
   1  -4   3   59.77    7.60
   1   4   3   28.48    6.53
   1   4   3   13.71    5.88
   1   4   3   32.22    5.92
  -1  -4  -3   20.66    3.95
  -1   4  -3   34.33    6.36
  -1   4  -3   27.97    4.89
  -1  -4  -3   31.91    5.39
   9   0  -5   -4.08    3.01
  -9   0   5    0.74    4.30
  -9   0   5    2.52    3.77
  -9   0   5    5.11    2.34
  -9   0   5    3.38    5.33
   9   0  -5   -5.36    3.63
   0   0  -7   -1.28    5.89
   0   0  -7   -0.78    5.84
   0   0  -7   -2.96    4.14
   0   0   7   -2.26    3.25
   9   0   0 1319.88  104.42
  -9   0   0 1369.39  104.43
   9   0   0 1359.79  104.93
  -9   0   0 1342.33  104.84
  -9   0   0 1314.52  105.07
   9   0   0 1273.35  105.13
   3   3   4  159.08   16.38
  -3   3  -4  189.09   14.88
  -3  -3  -4  181.77   15.28
   3  -3   4  178.82   14.64
  -3  -3  -4  177.49   15.27
   3   3   4  180.35   15.18
  -3   3  -4  167.39   15.58
  -3   3  -4  168.09   14.63
  -3  -3  -4  177.89   14.86
  -3  -3  -4  188.29   15.72
   3  -3   4  142.15   16.05
  -1   2  -6  852.06   67.19
   1   2   6  781.40   67.65
  -1  -2  -6  809.55   67.42
   1  -2   6  873.54   67.73
  -1   2  -6  848.48   67.20
  -1  -2  -6  928.20   67.61
   1  -2   6  836.07   67.04
   1  -2   6  786.05   66.96
  -1   2  -6  930.42   67.10
  -1  -2  -6  985.23   67.99
  -1  -3  -5   34.69    5.87
   1   3   5   36.47    7.78
  -1   3  -5   51.15    6.28
  -1   3  -5   53.93    5.37
  -1   3  -5   44.61    5.26
   1  -3   5   51.42    5.07
   1  -3   5   60.23    7.84
  -4   4   3  407.30   33.18
   4   4  -3  361.36   31.31
   4   4  -3  375.78   31.35
  -4   4   3  384.80   31.32
   4   4  -3  376.46   31.51
  -4   4   3  438.63   31.41
   4   4  -3  433.86   31.48
   6   1  -7   -0.06    2.70
   6   1  -7   -0.41    1.71
  -6  -1   7    0.54    3.10
   6   1  -7    2.85    3.46
  -6   1   7    1.48    4.42
  -6   1   7    2.52    5.50
   6  -1  -7    0.43    4.75
   6  -1  -7    2.13    4.24
   6   1  -7    1.32    1.75
   6   1  -7    0.57    3.27
   6   2   3   46.43    5.80
  -6  -2  -3   45.49    4.96
   6  -2   3   31.64    4.70
  -6   2  -3   36.83    6.57
  -6   2  -3   27.12    5.50
  -6  -2  -3   38.31    5.19
  -6  -2  -3   26.82    6.84
  -6  -2  -3   35.82    6.47
  -8   1   6  167.46   14.23
  -8  -1   6  164.17   13.91
  -8  -1   6  170.85   13.46
   8   1  -6  164.85   13.36
   8   1  -6  165.63   13.67
  -8   1   6  155.68   14.06
  -8   1   6  168.49   15.24
   8   1  -6  160.50   12.98
  -8  -1   6  175.16   13.65
   8  -1  -6  161.06   14.17
  -3   4  -2  987.90   76.88
  -3  -4  -2  944.60   76.90
   3   4   2  926.33   77.12
  -3   4  -2 1028.81   77.65
   3   4   2  916.53   76.80
   3  -4   2 1277.09   77.89
   3  -4   2 1051.69   76.72
  -3  -4  -2  925.62   76.71
  -3  -4  -2  925.43   76.98
   7   0   3   13.54    3.96
  -7   0  -3   14.24    6.84
  -4  -4  -1   35.53    4.70
   4   4   1   29.15    6.05
  -4  -4  -1   24.62    4.80
   4  -4   1   14.98    3.67
  -4  -4  -1   26.24    4.68
   4   4   1   24.89    4.88
  -4   4  -1   14.56    6.32
  -7   3   0 1126.97   88.38
  -7   3   0 1059.77   89.17
  -7  -3   0 1106.53   88.44
   7  -3   0 1095.03   88.11
   7  -3   0 1081.28   88.26
  -7  -3   0 1183.75   88.25
  -7  -3   0 1156.73   88.03
   7   3   0 1148.77   88.19
  -8   2   5  307.85   23.54
   8  -2  -5  313.74   23.49
  -8  -2   5  325.43   22.69
   8  -2  -5  265.00   22.39
  -8   2   5  308.72   24.49
   8   2  -5  309.14   23.28
  -8   2   5  320.76   23.79
   7   2   2  141.66   11.29
  -7   2  -2  123.94   12.64
  -7  -2  -2  130.60   12.57
   7  -2   2  122.50   11.35
   7   2   2  134.88   11.92
  -7  -2  -2  133.40   11.53
  -7  -2  -2  135.41   11.26
  -5  -4   1   25.92    3.52
   5   4  -1   23.46    3.79
  -5  -4   1   25.39    4.23
  -5  -4   1   22.81    3.59
   5   4  -1   21.57    4.88
  -5   4   1   23.79    7.03
  -5   4   1   27.51    3.45
   5  -4  -1   26.75    3.06
   5   4  -2    6.81    3.46
   5   4  -2    6.92    3.91
   5  -4  -2    3.12    4.42
   5   4  -2    7.14    2.65
  -5   4   2    8.84    2.42
  -5   4   2   -4.35    7.02
   5  -4  -2    6.85    2.22
  -7  -3   4  296.10   22.21
   7  -3  -4  268.26   21.92
  -7   3   4  274.35   22.11
   7  -3  -4  286.36   22.95
   7   3  -4  290.79   22.67
   6   0   4  492.10   39.10
  -6   0  -4  495.59   40.15
   6   3  -5    1.51    1.65
   6  -3  -5   -4.30    5.12
  -6   3   5    0.54    1.67
   6   3  -5   -0.07    2.79
  -6   3   5    2.10    2.08
   9   1  -5  272.96   20.98
  -9  -1   5  253.85   20.14
  -9   1   5  255.41   21.60
  -9   1   5  273.72   21.02
  -9  -1   5  275.61   20.39
  -9   1   5  243.10   20.75
   9   1  -5  250.79   20.04
   9  -1  -5  257.90   20.63
   9  -1  -5  240.74   19.97
  -9  -1   5  244.17   20.51
  -9  -1   5  269.37   20.30
   7   0  -7    0.11    4.10
  -7   0   7    0.49    5.07
  -7   0   7   -2.20    4.20
   7   0  -7   -5.53    3.78
   0  -1  -7   70.19    7.79
   0   1  -7   71.16    7.39
   0   1  -7   69.39    7.00
   0  -1   7   76.48    7.76
   0  -1  -7   66.80    8.33
   0   1  -7   72.97    7.34
   0   1   7   66.80    7.29
   0  -1   7   75.18    6.90
   0  -1  -7   76.58    8.70
   0  -1   7   64.10    6.53
   9   1   0  182.40   14.72
   9  -1   0  179.02   14.89
  -9  -1   0  177.89   15.00
  -9   1   0  163.97   16.18
  -9  -1   0  175.60   16.00
   9   1   0  184.79   16.12
  -9   1   0  187.34   16.22
  -9  -1   0  190.31   14.73
   9  -1   0  167.96   15.24
   3   0   6  120.18   11.09
   3   0   6  127.00   10.88
  -3   0  -6  114.14   12.35
  -3   0  -6  130.22   11.21
  -2  -4   4  202.46   16.29
  -2   4   4  209.95   16.20
   2   4  -4  192.37   16.48
  -2   4   4  198.25   16.83
   2   4  -4  207.58   16.52
   2   4  -4  177.13   16.89
  -2  -4   4  210.69   17.20
  -7  -2   6  269.81   21.34
  -7   2   6  295.05   23.77
   7   2  -6  275.68   21.48
  -7   2   6  282.07   22.46
   7  -2  -6  311.48   22.59
   7   2  -6  262.45   21.30
  -7   2   6  270.03   22.62
   7   2  -6  270.17   21.39
   7   2  -6  295.05   21.79
  -5   2  -4  131.59   12.38
  -5   2  -4  130.27   12.29
  -5  -2  -4  157.42   12.35
  -5  -2  -4  138.95   13.21
  -5  -2  -4  132.69   12.96
   8   0   2  112.98    9.54
  -8   0  -2  102.31   10.03
   1   4  -4   54.76    5.72
  -1  -4   4   68.65    7.69
   1   4  -4   52.44    6.02
   1  -4  -4   58.59    5.66
   1   4  -4   57.39    7.22
  -1  -4   4   67.96    5.77
  -1   4   4   49.22    6.96
  -3   2   7   52.11    6.36
   3  -2  -7   65.41    5.30
   3   2  -7   45.88    5.03
   3   2  -7   45.42    5.64
  -3  -2   7   48.00    4.63
   3  -2  -7   57.37    7.07
   3   2  -7   50.81    5.17
   3  -2  -7   53.59    7.32
   3   2  -7   40.20    6.92
  -3  -2   7   43.45    6.08
   3   4  -4  188.51   18.17
  -3   4   4  227.70   17.72
   3   4  -4  225.16   18.02
  -3   4   4  202.89   21.17
  -3  -4   4  216.44   17.72
  -3  -4   4  246.97   18.59
   3   4  -4  197.30   17.89
   2  -4   3   20.91    7.37
   2   4   3   14.75    6.36
  -2  -4  -3   19.18    3.80
  -2   4  -3   23.57    4.65
  -2   4  -3   13.85    6.23
  -2   4  -3   16.41    3.38
  -2  -4  -3   20.42    5.09
  -2  -4  -3   20.10    5.19
   2   4   3   22.58    5.17
   2  -4   3   20.48    3.61
   9   2  -3    0.95    1.88
   9   2  -3   -6.17    6.37
   9  -2  -3   -3.76    2.58
  -9  -2   3    1.06    2.13
  -9  -2   3   -3.37    3.56
  -9   2   3   -4.64    6.72
  -9   2   3   -2.63    4.73
   9  -2  -3   -1.56    3.75
   9   2  -3   -0.90    3.86
   9   2  -2  631.88   47.37
   9   2  -2  601.93   46.05
  -9  -2   2  613.01   46.66
   9   2  -2  532.33   46.42
  -9  -2   2  611.53   46.02
   9  -2  -2  586.85   46.38
   9  -2  -2  560.61   46.21
  -9   2   2  529.85   46.61
  -9   2   2  525.54   47.23
  -9  -2   2  601.56   46.13
   4   2  -7   51.67    5.28
  -4  -2   7   44.28    5.90
   4  -2  -7   49.30    7.12
   4  -2  -7   54.79    7.13
   4   2  -7   50.93    6.67
   4   2  -7   54.47    5.39
  -4   2   7   51.77    5.90
   4  -2  -7   66.27    4.95
  -4  -2   7   51.36    4.90
   4   2  -7   59.46    5.87
   3   3  -6   75.44    7.08
   3  -3  -6  116.69    7.20
  -3  -3   6   75.35    7.14
   3  -3  -6   84.69    9.44
  -3   3   6   69.16    8.55
   3  -3  -6  103.40    9.10
   3   3  -6   66.10    7.23
  -3  -3   6   74.79    8.25
   3   3  -6   76.46    7.30
  -3  -3   6   73.75    7.02
  -5  -4   0  206.01   16.33
  -5   4   0  165.84   17.53
  -5   4   0  188.56   16.14
  -5  -4   0  212.34   16.24
   5   4   0  191.69   16.14
  -5  -4   0  198.90   16.19
  -7  -1  -3   88.79    9.80
  -7  -1  -3   77.48    7.48
  -7   1  -3   56.04    9.13
  -7   1  -3   71.17    7.91
   7  -1   3   69.01    7.20
   7   1   3   85.84    7.34
  10   0  -3    1.66    2.89
 -10   0   3    0.71    4.60
  10   0  -3   -1.83    5.55
  10   0  -3   -2.19    6.52
 -10   0   3   -2.94    5.25
 -10   0   3    2.61    3.88
   2  -3  -6  155.37   15.14
   2  -3  -6  164.97   16.20
  -2   3   6  165.69   16.12
   2   3  -6  220.12   15.18
  -2  -3   6  217.42   15.25
   2   3  -6  202.09   15.36
  -2  -3   6  214.87   16.20
  -2  -3   6  172.05   15.04
   2   3  -6  187.50   15.33
   2  -3  -6  150.56   16.25
   2  -2  -7   74.99    7.89
   2  -2  -7   54.09    7.13
  -2  -2   7   56.97    5.72
   2   2  -7   52.48    5.68
   2   2  -7   57.08    5.68
   2   2  -7   58.79    6.03
   2  -2  -7   52.93    6.10
  -2   2   7   64.84    7.11
  -2  -2   7   58.98    7.01
  -2  -2   7   57.42    5.40
  -5   4   3  135.90   10.56
   5   4  -3  122.92   10.57
   5   4  -3  141.45   10.68
   5  -4  -3  127.35   11.81
  -5   4   3  143.73   10.71
   5   4  -3  113.05   10.42
   5   4  -3  117.48   10.58
  -5   4   3  136.62   13.39
 -10   0   2   27.51    5.77
  10   0  -2   17.27    6.74
  10   0  -2   27.37    6.24
 -10   0   2   31.98    6.05
  10   0  -2   22.50    3.62
 -10   0   2   19.99    4.13
   4   3  -6    3.20    2.45
  -4  -3   6    7.60    4.01
  -4  -3   6    6.17    2.20
   4   3  -6    9.19    2.16
   4  -3  -6    4.54    5.44
   4  -3  -6    8.42    5.35
  -4   3   6    2.48    3.94
   4   3  -6    6.97    2.69
  -4  -3   6    7.38    2.33
  -1   0  -7    5.38    6.17
  -1   0  -7    0.84    4.09
  -1   0  -7    0.15    6.34
   1   0   7   -0.19    3.71
  -6  -1  -4   86.14   10.68
  -6   1  -4   87.10   10.78
  -6   1  -4   94.41    9.34
   6  -1   4   99.71    8.93
   6   1   4  108.56    8.98
   0  -4   4  121.87   12.45
   0   4  -4  124.73   12.00
   0   4  -4  132.14   11.07
   0  -4   4  129.52   10.94
   0   4   4  116.82   11.95
   0  -4  -4  132.04   12.19
   0  -4  -4  146.64   12.00
   0   4  -4  126.63   11.18
   0  -4  -4  132.30   11.06
  -8  -2  -1   25.49    4.07
  -8  -2  -1   21.51    3.82
   8   2   1   23.48    5.67
   8   2   1   18.99    3.70
  -8   2  -1   23.36    5.33
   8  -2   1   23.59    4.00
  -6  -3  -2   50.01    7.47
  -6   3  -2   41.84    8.36
   6  -3   2   64.44    6.35
  -6  -3  -2   74.96    7.45
  -6  -3  -2   59.96    6.72
  -6  -3  -2   57.84    6.23
   6   3   2   65.52    6.50
  -5   3  -3   80.06    9.52
  -5  -3  -3  112.54    9.70
  -5  -3  -3   93.77   10.51
  -5  -3  -3  110.91   10.15
  -5   3  -3   94.34   11.04
  -5  -3  -3  152.34   10.97
   5   3   3  113.99    9.91
   7  -1  -7    9.29    4.04
   7   1  -7   11.97    3.52
  -7   1   7   15.72    4.91
  -7  -1   7   14.04    3.36
   7   1  -7   10.26    1.95
   7  -1  -7   11.83    4.85
   7   1  -7   15.01    2.63
   7   1  -7   15.05    3.88
  -7   1   7   17.42    5.69
  -7  -1   7   15.13    4.70
  -3   1  -6   52.09    6.42
  -3   1  -6   57.94    7.46
  -3  -1  -6   54.75    7.97
  -3  -1  -6   56.36    6.55
  -3  -1  -6   43.04    7.68
   5  -2  -7  192.74   16.77
   5  -2  -7  217.01   16.61
  -5   2   7  187.62   15.31
  -5  -2   7  199.02   15.28
   5   2  -7  185.67   15.39
  -5  -2   7  174.43   15.63
   5   2  -7  198.82   15.90
   5   2  -7  202.56   15.67
   5   2  -7  187.46   15.37
  -8  -1  -2  282.36   22.52
   8   1   2  271.87   22.34
   8   1   2  303.27   23.54
   8  -1   2  259.84   22.34
  -8  -1  -2  286.25   23.67
  -8  -1  -2  297.23   22.42
  -5   0  -5    0.91    3.99
  -5   0  -5   -8.03    6.85
   5   0   5   -4.15    3.69
  -2   3  -5  129.27   10.90
   2  -3   5  123.66   10.66
  -2  -3  -5  118.94   11.20
   2   3   5  100.14   12.50
   2  -3   5  118.22   12.82
  -2   3  -5  132.57   10.72
  -2   3  -5  114.82   11.26
 -10   0   4  440.57   36.35
  10   0  -4  496.09   37.18
 -10   0   4  521.14   36.54
  10   0  -4  446.85   36.08
  10   0  -4  464.86   36.51
 -10   0   4  425.39   36.78
   4   4  -4   25.98    3.77
   4   4  -4   20.29    3.10
  -4   4   4   34.61    4.25
   4   4  -4   23.66    3.08
   4   4  -4   21.38    3.42
  -4   4   4   26.76    3.02
  -4   4   4   22.77    8.62
   4  -4  -4   21.44    5.92
   9   2  -4  215.93   17.75
  -9  -2   4  251.62   18.29
   9   2  -4  226.11   18.95
  -9   2   4  226.00   19.98
  -9   2   4  214.35   18.55
  -9  -2   4  238.30   17.93
   9  -2  -4  237.87   18.68
   9  -2  -4  225.03   17.94
   1  -3  -6   -2.64    5.23
   1   3  -6    4.95    2.90
   1   3  -6    7.89    3.99
  -1   3   6    4.53    6.12
  -1  -3   6    4.03    3.10
   1  -3  -6   -1.89    3.36
   1   3  -6   -1.42    2.92
  -1  -3   6    0.29    5.50
   1  -3  -6   -2.25    5.45
  -9   2   1   -9.14    5.13
   9  -2  -1    2.00    3.14
   9  -2  -1   -2.44    3.34
  -9   2   1   -0.44    6.06
  -9  -2   1   -2.11    2.64
   9   2  -1   -0.31    2.52
   9   2  -1    2.89    5.27
  -9  -2   1    0.14    4.45
  -9  -2   1   -0.93    2.93
  -2   2  -6  200.75   17.05
  -2  -2  -6  194.63   18.18
   2   2   6  176.33   18.42
  -2   2  -6  207.18   17.07
  -2  -2  -6  193.60   17.62
  -2  -2  -6  220.91   17.53
   2  -2   6  212.39   16.82
  -9   0   6   34.99    6.21
  -9   0   6   30.23    5.08
   9   0  -6   22.78    3.67
   9   0  -6   36.88    4.44
  -9   0   6   31.60    4.91
  -8  -3   2  396.98   30.58
   8   3  -2  393.65   30.92
   8  -3  -2  392.68   30.83
  -8  -3   2  405.54   31.16
  -8   3   2  365.64   31.05
   8  -3  -2  371.43   31.22
   1  -2  -7   -4.03    5.89
   1  -2  -7   -4.00    5.29
  -1  -2   7   -2.24    2.90
   1   2  -7   -0.10    3.38
  -1  -2   7   -0.14    5.32
  -1  -2   7    0.62    3.07
  -1   2   7   -0.11    5.60
   1  -2  -7   -2.60    4.17
   1   2  -7    0.86    3.60
   1   2  -7    0.15    3.37
  -9   0  -1   -1.70    6.54
  -9   0  -1   -4.21    4.31
   9   0   1   -4.03    3.20
  10   1  -3   -2.67    6.53
  10  -1  -3   -5.55    7.35
  10  -1  -3   -0.16    2.93
 -10   1   3    0.56    5.74
 -10   1   3    2.09    5.30
  10  -1  -3    2.06    3.29
  10   1  -3    2.04    2.43
  10   1  -3   14.61    5.68
 -10  -1   3    6.31    3.30
 -10  -1   3    3.94    3.99
 -10  -1   3    7.60    4.34
 -10   1   3   -3.39    4.55
  -4   2  -5   10.79    4.29
  -4   2  -5   14.29    4.46
  -4  -2  -5   25.47    6.15
   8  -3  -3   49.49    5.09
  -8   3   3   54.09    5.53
  -8  -3   3   68.75    5.80
   8  -3  -3   45.22    6.20
  -5   3   6   49.14    7.52
  -5   3   6   53.35    6.80
  -5  -3   6  136.03    7.69
   5   3  -6   51.07    7.14
   5   3  -6  135.42    6.98
   5   3  -6   52.44    7.13
   5   3  -6   85.01    7.23
   5  -3  -6   48.11    9.12
   5  -3  -6   46.94    8.47
  -7  -3  -1   31.00    4.61
  -7  -3  -1   30.74    5.45
   7   3   1   31.12    4.63
   7  -3   1   22.97    4.11
  -7  -3  -1   27.70    3.93
  -7   3  -1   22.09    7.08
  -7  -3  -1   24.98    5.52
  -7   3  -1   20.01    4.41
   4  -4   2  280.33   23.46
  -4  -4  -2  278.68   23.91
  -4  -4  -2  308.07   23.74
  -4  -4  -2  303.05   23.84
   4   4   2  291.90   23.70
  -4   4  -2  311.63   24.89
   4   4   2  262.34   24.37
  -4   3  -4 1466.73  120.40
  -4  -3  -4 1672.98  120.88
  -4   3  -4 1440.77  120.71
  -4  -3  -4 1573.02  120.62
   4  -3   4 1475.10  120.18
  -4  -3  -4 1687.13  120.63
  10  -1  -2    1.63    3.04
  10  -1  -2    2.72    3.69
  10   1  -2    0.06    2.57
 -10   1   2    4.53    5.46
 -10  -1   2    4.50    3.47
  10  -1  -2    4.70    7.01
 -10  -1   2  -14.51    5.10
 -10   1   2    4.66    5.76
 -10  -1   2   -0.06    3.04
  10   1  -2    4.98    5.79
  10   1  -2    3.38    7.60
 -10   1   2    2.56    4.11
   4   0  -8  824.05   63.57
   4   0  -8  789.22   64.05
  -4   0   8  907.65   63.14
   4   0  -8  905.96   63.92
  -4   0   8  811.04   63.64
  -1  -1  -7   54.32    7.86
   1   1   7   38.06    6.58
  -1   1  -7   59.97    7.12
  -1  -1  -7   46.91    7.96
  -1   1  -7   56.45    6.41
   1  -1   7   57.71    5.94
   1  -1   7   53.96    5.71
  -1  -1  -7   56.64    6.83
 -10   0   1   -2.79    3.42
  10   0  -1   -4.40    6.68
  10   0  -1   -0.64    2.90
  10   0  -1   -4.28    5.87
 -10   0   1   -2.99    5.13
 -10   0   1    2.88    5.82
   3   0  -8 1684.58  129.38
  -3   0   8 1720.60  129.19
   3   0  -8 1639.24  129.01
   3   0  -8 1981.42  129.74
  -3   0   8 1558.18  128.67
   3   0  -8 1632.36  129.04
   7   3  -5  216.75   16.30
  -7   3   5  204.16   16.22
   7   3  -5  223.46   16.78
   7  -3  -5  199.40   17.57
  -7   3   5  190.93   16.09
  -1   4  -4   40.18    5.20
  -1   4  -4   44.11    4.77
   1  -4   4   48.95    4.76
  -1  -4  -4   28.14    4.75
  -1  -4  -4   25.51    6.16
  -1  -4  -4   32.77    6.40
   1  -4   4   62.76    8.04
  -1   4  -4   35.81    6.85
  -5   1  -5   55.25    8.54
  -5  -1  -5   62.32    9.00
  -5   1  -5   57.85    6.82
   5  -1   5   64.37    6.54
   5   1   5   71.60    6.62
   8   3  -1    0.59    3.81
  -8  -3   1   -2.31    2.46
  -8   3   1   -1.39    6.61
  -8   3   1   -5.10    3.69
  -8  -3   1   -2.12    3.97
  -8  -3   1   -1.24    4.01
   8  -3  -1   -1.95    2.87
   8  -3  -1   -3.05    3.46
  -8  -3   1   -2.98    3.18
  -8   0   7   -2.28    4.23
  -8   0   7   -5.79    6.66
   8   0  -7   -8.92    4.24
  -8   0   7   -1.51    4.85
  -5   4  -1   78.55   11.27
  -5   4  -1   85.12    9.14
  -5  -4  -1  114.95    9.71
  -5  -4  -1  112.34    9.17
  -5  -4  -1  119.65    9.68
   5   4   1  113.28    9.52
  -5  -4  -1  100.17    9.81
 -10   1   4   10.74    4.82
  10   1  -4    0.89    5.77
  10   1  -4   11.33    5.52
  10   1  -4   11.00    2.35
 -10   1   4   13.33    6.02
 -10  -1   4   10.81    3.75
  10  -1  -4    7.30    7.60
  10  -1  -4   10.05    3.23
 -10  -1   4   12.64    3.73
 -10   1   4    9.47    4.82
 -10  -1   4    4.80    4.09
  10  -1  -4    9.48    3.01
   6   4  -2 1110.17   85.53
  -6  -4   2 1082.41   85.48
   6  -4  -2 1105.19   86.13
  -6   4   2 1064.88   86.98
  -6   4   2 1125.25   85.79
   6  -4  -2 1085.35   85.59
   6   4  -2 1087.31   85.82
   6   2  -7   41.86    4.59
   6   2  -7   39.98    4.08
   6   2  -7   39.90    4.76
   6  -2  -7   48.65    6.63
   6   2  -7   35.06    4.01
   6  -2  -7   36.05    5.88
  -6  -2   7   43.87    4.55
   6   2  -7   45.15    4.04
   5   0  -8  418.32   30.82
   5   0  -8  335.91   30.80
  -5   0   8  371.87   29.60
   5   0  -8  334.11   30.03
  -5   0   8  400.53   30.40
   5   0  -8  462.67   30.37
   6  -4  -1   15.96    4.21
   6  -4  -1   21.43    3.04
  -6  -4   1   22.86    3.78
  -6  -4   1   26.62    3.19
  -6  -4   1   21.81    4.16
  -6   4   1   20.98    7.34
  -6   4   1   19.37    3.59
   6   4  -1   25.17    3.49
  -3  -4  -3  301.15   25.85
   3   4   3  293.22   26.13
  -3   4  -3  325.02   25.37
  -3   4  -3  328.14   26.52
   3   4   3  287.39   25.49
  -3  -4  -3  293.89   25.31
   3  -4   3  348.10   25.32
  -3  -4  -3  299.79   25.62
   0   3  -6    8.96    3.43
   0   3   6    5.25    6.64
   0  -3  -6    9.17    4.13
   0  -3   6    4.54    6.15
   0  -3  -6   -1.54    5.30
   0   3  -6    3.36    3.81
   0   3  -6    7.66    3.11
   0  -3   6    4.20    2.89
   0  -3  -6    9.52    5.85
  -9   1   6   18.98    5.01
   9   1  -6   18.96    4.88
  -9   1   6   19.27    7.06
  -9  -1   6   20.14    4.06
  -9   1   6   19.52    5.30
   9   1  -6   22.83    3.02
  -9  -1   6   21.06    4.56
  -9  -1   6   20.21    3.62
   9  -1  -6   13.58    4.78
   8   2  -6   17.26    1.82
   8   2  -6   17.89    1.83
   8   2  -6   24.91    2.52
  -8   2   6   29.35    7.96
   8   2  -6   27.28    4.41
  -8  -2   6   20.42    1.94
   8  -2  -6   23.78    5.39
  -8  -2   6   21.44    2.41
   9  -1   1  206.31   16.94
   9   1   1  213.61   16.85
  -9   1  -1  175.60   18.15
  -9  -1  -1  218.22   16.88
  -9  -1  -1  197.40   17.04
  -9   1  -1  202.05   17.92
   9   1   1  217.99   18.41
  -2   0   8   -5.32    2.89
   2   0  -8   -5.77    5.01
   2   0  -8    0.67    5.56
  -5   4   4  109.15    8.15
  -5   4   4  132.75    8.20
   5   4  -4  114.03    8.19
  -5   4   4  107.17   11.81
   5   4  -4   91.86    7.75
   5   4  -4   84.61    7.76
   5   4  -4   74.21    7.69
   5  -4  -4   97.42    9.93
 -10   0   5   -0.96    2.93
 -10   0   5   -6.13    4.38
  10   0  -5   -1.66    3.92
 -10   0   5   -5.19    5.51
  10   0  -5   -3.93    2.81
 -10   0   5   -1.06    3.59
   8  -3  -4  669.98   53.26
   8  -3  -4  645.96   52.47
  -8   3   4  672.51   52.74
   8   3  -4  717.48   53.23
  -8  -3   4  704.68   52.74
   4  -1  -8   17.89    5.31
   4  -1  -8   47.34    7.01
  -4   1   8   37.64    4.38
   4   1  -8   35.73    5.34
  -4  -1   8   45.30    6.14
   4   1  -8   65.48    6.78
   4   1  -8   42.99    5.88
  -4  -1   8   85.77    4.83
   4   1  -8   27.68    6.98
   4  -1  -8   19.49    6.90
   6   4  -3    6.71    1.33
   6   4  -3    6.14    1.87
  -6   4   3   14.17    7.47
  -6   4   3   14.57    2.57
   6  -4  -3   12.01    2.07
  -6  -4   3    6.05    1.20
  -6  -4   3    3.39    1.11
   6  -4  -3    9.72    4.70
   9   2  -5   95.98    8.20
  -9  -2   5  104.19    8.30
  -9   2   5  129.81   11.46
   9  -2  -5  124.81    9.83
  -9  -2   5   99.31    8.37
   9   2  -5  136.68   10.23
   9  -2  -5  124.23    8.40
  -9  -2   5   94.09    8.30
  -9  -2   5  139.88    8.79
 -10   1   1   52.99    8.07
  10   1  -1   57.15    5.34
 -10  -1   1   53.85    5.29
 -10   1   1   52.05    7.94
  10  -1  -1   44.71    6.11
 -10  -1   1   49.80    7.11
 -10  -1   1   62.37    6.00
  10   1  -1   40.91    7.66
  10  -1  -1   47.05    5.54
   0  -2  -7    7.26    4.74
   0   2  -7    9.75    3.73
   0   2   7   10.04    6.28
   0   2  -7    7.53    3.62
   0  -2   7    6.12    5.96
   0  -2   7    7.65    3.38
   0  -2  -7    8.90    6.05
   0   2  -7    8.59    3.75
   0  -2  -7    7.44    5.35
   3  -1  -8  438.27   32.27
   3  -1  -8  375.78   31.48
  -3  -1   8  429.93   30.85
  -3   1   8  428.81   30.90
   3   1  -8  347.64   31.33
   3   1  -8  329.93   30.96
   3   1  -8  376.80   31.10
  -3  -1   8  349.44   31.15
   3  -1  -8  479.88   32.28
   3   1  -8  353.32   31.71
   9   2   0  105.05    9.43
  -9  -2   0   96.20    7.73
  -9   2   0   72.13    9.36
   9  -2   0   83.64    7.90
  -9  -2   0   79.31    8.95
   9   2   0   84.33    7.62
  -9  -2   0   82.85    7.79
   0  -5   0    0.69    3.98
   0   5   0   -0.44    4.77
   0   5   0    0.63    4.99
   6   3  -6   31.22    2.92
   6  -3  -6   37.18    6.30
  -6   3   6   47.95    4.11
   6   3  -6   47.92    4.27
  -6  -3   6   35.34    3.15
   6   3  -6   28.32    2.89
   6   3  -6   33.68    2.82
   6   3  -6   50.40    3.66
  -6   3   6   33.27    3.04
  -8  -1   7   26.01    3.66
   8   1  -7   23.78    3.89
  -8  -1   7   15.94    5.56
  -8   1   7   11.94    5.55
  -8  -1   7   24.21    4.65
  -8   1   7   10.93    5.12
   8  -1  -7   12.87    4.93
   8   1  -7   15.64    3.50
   8   1  -7   13.33    2.13
  -8   1   7    9.20    7.59
   6   0  -8 1222.61  101.16
  -6   0   8 1467.07  101.84
  -6   0   8 1391.02  102.23
   6   0  -8 1503.47  102.05
   6   0  -8 1348.63  101.36
   6   0  -8 1475.21  101.97
   4   0   6  166.69   13.69
  -4   0  -6  160.86   13.91
  -4   0  -6  142.56   15.13
   5  -1  -8  202.09   15.50
  -5  -1   8  188.92   14.06
   5   1  -8  206.64   14.62
   5  -1  -8  186.98   15.71
  -5   1   8  164.64   13.93
   5   1  -8  207.10   15.11
  -5  -1   8  198.70   14.72
   5  -1  -8  158.52   14.14
   5   1  -8  189.54   15.34
   5   1  -8  181.16   14.36
  -2   0  -7    3.53    6.62
  -2   0  -7   -0.15    4.12
   1   5   0    2.16    6.75
  -1   5   0   -0.79    5.23
  -1  -5   0    1.14    4.04
   1   5   0   -1.31    4.57
   1  -5   0    1.15    4.03
  -1   5   0   -3.67    6.78
  -1   5   0    0.23    4.81
   1   5   0   -3.18    4.95
  -6  -4   0  108.49    8.90
  -6  -4   0   95.73    9.16
  -6   4   0   70.58   11.03
  -6  -4   0   94.41    8.91
  -6   4   0   99.03    8.79
   6   4   0   95.33    8.67
  -6  -4   0   96.72    8.47
   2   4  -5   23.68    3.75
   2   4  -5   15.33    4.40
   2   4  -5   21.99    3.46
  -2  -4   5   24.82    3.20
  -2  -4   5   20.38    5.66
   2  -4  -5   27.49    3.24
  -2   4   5   11.11    5.04
  -3   4   5   42.17    5.80
   3   4  -5   48.74    4.68
   3  -4  -5   34.66    6.99
   3   4  -5   39.39    4.78
  -3  -4   5   48.90    5.97
   3   4  -5   43.61    4.91
  -3  -4   5   50.18    4.31
  -3   4   5   38.38    4.04
   3  -4  -5   31.35    6.13
   0  -5  -1  769.66   60.70
   0   5   1  726.55   61.37
   0  -5   1  822.75   60.36
   0   5   1  729.06   60.64
   0   5  -1  809.32   61.39
   0   5  -1  748.49   60.46
   0   5  -1  732.93   60.57
   0   5   1  786.12   60.15
   0   5   1  682.18   60.55
   1   5  -1  317.80   22.00
  -1   5   1  291.42   22.67
   1   5  -1  269.17   20.30
   1   5  -1  284.94   20.88
  -1   5   1  219.70   20.13
   1   5  -1  222.84   20.97
  -1  -5   1  247.74   20.61
   1  -5  -1  253.32   21.15
   7   2   3  108.14    9.16
   7  -2   3   97.19    9.18
  -7  -2  -3   84.56   10.59
  -7   2  -3   83.63   10.45
  -7  -2  -3  117.96    9.59
   2  -1  -8  561.72   42.23
   2   1  -8  524.67   41.62
   2  -1  -8  537.16   41.88
  -2   1   8  513.27   41.16
   2   1  -8  525.86   41.39
   2   1  -8  535.25   42.07
  -2  -1   8  479.56   41.03
   2  -1  -8  556.89   41.68
  -2  -1   8  511.85   41.53
   2   1  -8  545.06   41.33
   8  -3   0  130.83   12.00
  -8  -3   0  148.44   11.67
   8   3   0  152.32   12.28
  -8   3   0  136.85   14.13
  -8  -3   0  142.67   12.63
  -8   3   0  132.59   12.20
  -8  -3   0  144.15   12.02
  -3  -3  -5   18.62    5.46
  -3   3  -5   20.69    5.42
  -3  -3  -5   13.66    5.51
  -3   3  -5   16.53    4.32
   3  -3   5   19.40    3.93
  -3  -3  -5   25.82    6.40
  10   1  -5   41.94    4.17
  10  -1  -5   39.28    4.13
 -10  -1   5   42.45    5.65
 -10   1   5   41.49    5.68
 -10   1   5   45.61    4.92
 -10   1   5   43.30    6.39
 -10  -1   5   41.53    4.85
 -10   1   5   40.89    7.54
  10  -1  -5   49.87    5.21
 -10  -1   5   45.26    4.60
 -10  -1   5   42.85    5.20
  10   1  -5   42.21    6.76
   1   0  -8  119.17   11.24
   1   0  -8  123.24   11.61
   1   0  -8  111.00   10.57
  -1   0   8  105.30    9.59
   1   4  -5   11.73    4.56
   1  -4  -5   10.73    3.07
  -1   4   5   18.13    5.59
   1   4  -5   12.80    3.35
  -1  -4   5   16.01    3.01
   1   4  -5   15.50    3.47
  -1  -4   5   11.25    5.73
  -2   4  -4  431.47   30.29
  -2   4  -4  397.96   31.13
  -2  -4  -4  350.62   30.72
   2  -4   4  415.86   30.18
   2  -4   4  423.14   31.49
  -2   4  -4  348.27   30.13
  -2  -4  -4  339.83   30.15
  -2  -4  -4  350.76   30.86
  10   0   0   63.83    6.45
 -10   0   0   66.27    8.82
 -10   0   0   71.71    7.52
  -6  -2  -4   19.29    6.08
  -6  -2  -4   15.40    6.67
   6  -2   4   19.91    3.99
  -6  -2  -4   20.85    4.93
  -6   2  -4   17.92    5.23
  -6   2  -4   13.79    5.55
   7   2  -7   12.25    2.79
   7  -2  -7   12.31    5.33
   7   2  -7   13.06    2.23
   7   2  -7   15.51    3.11
   7   2  -7   12.35    3.09
   7   2  -7   14.08    2.51
  -7  -2   7   11.78    2.54
  -7   2   7   10.94    8.29
  -3  -2  -6  278.73   21.81
  -3   2  -6  233.30   21.14
  -3   2  -6  257.04   21.05
   3  -2   6  258.73   20.82
  -1  -5  -1  309.99   23.08
  -1   5  -1  217.94   23.33
   1  -5   1  174.14   23.46
  -1   5  -1  190.42   22.51
   1  -5   1  216.13   22.04
   1   5   1  409.92   23.08
   1   5   1  440.80   24.87
   1   5   1  352.78   23.14
   2   5  -1  466.43   40.00
  -2   5   1  463.38   41.05
   2   5  -1  523.51   40.72
  -2   5   1  481.04   39.69
   2   5  -1  502.88   39.97
   2   5  -1  546.02   39.76
  -2  -5   1  520.03   39.95
   2  -5  -1  473.97   40.20
   1   3   6  128.11   13.12
   1  -3   6  125.97   11.02
   1  -3   6  122.74   12.75
  -1   3  -6  131.09   11.28
  -1   3  -6  134.23   11.48
  -1   3  -6  125.85   11.06
  -1  -3  -6  131.61   11.71
  -8  -2  -2  222.45   17.73
   8   2   2  226.02   17.75
  -8  -2  -2  219.90   18.00
  -8  -2  -2  206.84   18.76
   8  -2   2  208.38   17.91
   8   2   2  217.32   18.49
  -8   2  -2  206.71   19.08
  -4   4   5   27.28    3.09
  -4  -4   5   24.20    4.73
   4   4  -5   36.29    3.88
   4  -4  -5   31.63    6.76
  -4   4   5   35.28    4.68
   4   4  -5   27.66    3.70
  -4   4   5   28.61    9.38
   4   4  -5   24.59    3.54
   2   5   0   -1.78    4.52
  -2   5   0   10.70    6.64
  -2  -5   0    3.56    4.41
  -2   5   0    7.03    2.96
   2   5   0   -4.05    4.99
   2   5   0    6.69    6.89
   2  -5   0   -0.80    3.97
   8   0   3   -3.90    3.60
  -8   0  -3   -1.03    6.81
  -8   0  -3   -3.22    4.25
  -7   0  -4   12.75    7.58
   7   0   4   14.10    3.69
   6   1  -8   82.73    8.17
   6  -1  -8   71.94    8.82
   6   1  -8   76.58    8.37
   6   1  -8   84.89    6.97
   6  -1  -8   72.10    8.57
   6   1  -8   83.09    7.64
  -6  -1   8   84.79    7.86
   6   1  -8   90.56    7.13
  -4   1  -6   22.25    6.44
  -4  -1  -6   13.10    7.28
  -4  -1  -6   14.99    4.97
  -4   1  -6   30.54    5.08
  -2   1  -7   52.77    8.13
  -2   1  -7   65.76    7.19
  -2  -1  -7   62.01    8.83
  -2  -1  -7   71.79    7.60
   2  -1   7   68.33    6.82
  -2  -1  -7   72.76    9.17
  -6  -3  -3   34.74    5.56
  -6  -3  -3   36.38    6.14
  -6  -3  -3   29.12    6.78
  -6   3  -3   28.01    7.09
  -6   4   4   -3.41    8.02
   6   4  -4    7.16    2.29
  -6   4   4    1.33    2.26
  -6   4   4    2.66    2.20
   6  -4  -4   -0.17    5.05
  -1   5   2   30.05    3.67
  -1   5   2   20.37    8.23
   1   5  -2   28.37    4.88
   1  -5  -2   37.44    6.35
   1   5  -2   30.84    5.38
  -1  -5   2   31.77    4.19
   1   5  -2   39.98    4.14
   1   5  -2   36.97    6.63
  10   2  -3  163.20   13.07
 -10  -2   3  174.02   13.17
 -10   2   3  147.35   14.34
  10   2  -3  182.57   15.36
  10  -2  -3  148.47   13.63
 -10   2   3  136.25   15.03
  10   2  -3  169.31   13.91
  10  -2  -3  150.24   13.29
 -10  -2   3  171.26   13.18
 -10  -2   3  169.17   13.90
  -5  -4  -2  294.46   23.65
  -5  -4  -2  311.63   24.31
   5   4   2  295.33   23.85
  -5  -4  -2  332.23   24.14
  -5   4  -2  263.30   24.94
  -5  -4  -2  312.05   24.10
   5  -4   2  257.77   23.68
  -7   0   8  190.05   16.42
  -7   0   8  191.21   15.81
   7   0  -8  191.12   15.90
   7   0  -8  179.71   16.13
   1  -1  -8   94.14    9.45
  -1   1   8   83.89    8.19
   1  -1  -8   97.87   10.03
  -1  -1   8   82.15    7.77
   1   1  -8  101.50    8.91
   1   1  -8   86.82   10.10
   1  -1  -8   85.28    9.46
   1   1  -8   87.00    8.77
   0  -4  -5    9.39    3.64
   0  -4   5   16.53    3.40
   0  -4   5   14.49    6.20
   0   4   5    9.88    6.12
   0   4  -5   20.72    3.65
   0   4  -5   26.64    5.20
   0   4  -5   17.96    3.74
   8   3  -5    1.28    1.86
   8   3  -5   -3.62    4.19
  -8   3   5   -0.06    2.31
  -8   3   5    7.14    7.46
   8  -3  -5   -3.00    4.94
  -7  -3  -2   -2.10    3.59
  -7  -3  -2   -6.10    5.68
   7  -3   2   -1.00    3.56
  -7   3  -2   -5.47    6.45
   7   3   2    1.65    4.20
  -7  -3  -2    5.42    5.12
  -7  -3  -2    3.47    4.09
   0  -5  -2    0.31    5.39
   0  -5   2    2.37    3.19
   0   5   2    0.31    2.31
   0   5   2    5.59    8.47
   0   5  -2    0.90    6.08
   0   5  -2    2.04    4.77
   0   5  -2   -2.12    2.98
   0  -5   2   -1.54    7.28
 -10   2   2  128.29   13.43
  10   2  -2  128.47   13.02
  10  -2  -2  144.57   12.57
 -10  -2   2  152.08   12.25
 -10  -2   2  158.13   12.09
 -10   2   2  126.91   14.36
  10   2  -2  154.21   12.12
  10  -2  -2  139.98   12.41
 -10  -2   2  153.64   13.25
  -1  -2  -7    7.84    6.61
   1  -2   7    7.15    3.75
  -1   2  -7    3.55    4.07
   1   2   7    0.96    6.81
  -1  -2  -7    5.82    5.32
  -1   2  -7   14.63    4.19
  -1  -2  -7    5.59    5.45
   9   0  -7    0.82    3.99
  -9   0   7    3.00    4.25
  -9   0   7   -4.54    5.82
   9   0  -7    0.11    0.95
   9   0  -7    0.02    0.53
  -9   0   7    0.70    4.74
  -2  -5   2    4.60    3.22
  -2   5   2    6.39    2.51
   2  -5  -2    9.13    5.35
  -2   5   2   13.21    7.94
   2   5  -2    6.82    4.03
   2   5  -2    1.83    5.78
   2   5  -2   11.76    4.51
   2   5  -2    6.47    2.68
 -10  -1   0   28.26    4.07
 -10  -1   0   26.99    6.55
 -10   1   0   17.99    6.04
  10   1   0   18.66    6.98
 -10  -1   0   27.63    4.48
 -10   1   0   21.12    7.44
  10   1   0   28.07    3.99
  10  -1   0   24.04    4.18
  -4   4  -3  401.31   32.50
  -4  -4  -3  394.32   31.78
  -4   4  -3  379.78   31.30
  -4  -4  -3  399.94   31.61
  -4  -4  -3  391.40   31.42
   4  -4   3  387.39   31.16
 -10   0   6   63.89    6.51
  10   0  -6   50.99    5.44
 -10   0   6   58.61    6.22
 -10   0   6   54.23    7.38
  10   0  -6   49.97    5.52
  -9   0  -2  354.15   29.12
   9   0   2  362.13   28.75
  -2  -5  -1   53.15    6.69
   2   5   1   42.24    7.18
   2  -5   1   52.94    5.60
   2   5   1   51.03    9.62
   2   5   1   46.22    6.84
  -2   5  -1   38.44    8.17
   7   3  -6   32.73    4.38
  -7   3   6   22.33    3.29
   7   3  -6   31.01    3.18
   7  -3  -6   34.25    6.33
  -5   3  -4   89.82    8.95
  -5   3  -4   92.01    9.96
  -5  -3  -4   97.67    9.57
  -5  -3  -4   88.99    9.64
  -5  -3  -4   98.73   10.38
   7  -4  -2   32.21    3.56
  -7   4   2   28.73    8.31
   7   4  -2   29.41    3.37
  -7   4   2   28.70    4.12
  -7  -4   2   28.43    3.13
  -7  -4   2   36.32    4.18
   7  -4  -2   39.01    5.25
  -5  -2  -5   -5.83    6.39
  -5   2  -5   -0.97    4.70
  -5  -2  -5   -1.26    5.07
  -5  -2  -5    3.14    6.80
  -5   2  -5   -2.14    5.09
   3   5  -1  219.58   22.62
  -3   5   1  288.26   21.78
   3  -5  -1  259.88   22.22
  -3  -5   1  275.63   21.92
   3   5  -1  235.36   21.94
  -3   5   1  238.84   23.47
   3   5  -1  288.04   21.68
   3   5  -1  264.74   22.11
  -8  -1  -3  165.97   15.46
   8  -1   3  160.31   13.63
  -8  -1  -3  168.99   13.92
   8   1   3  152.83   13.64
   6   0   5    8.42    3.92
  -6   0  -5    3.68    4.31
  -6   0  -5   -0.41    7.00
  10   2  -4    4.13    3.91
 -10   2   4    2.30    6.44
  10   2  -4    0.62    6.09
 -10  -2   4    8.61    3.37
  10  -2  -4   -2.20    3.55
  10  -2  -4   -0.35    2.23
 -10  -2   4    4.63    2.45
 -10   2   4    0.50    5.01
  10   2  -4    4.71    1.78
  -7   1  -4  100.24   11.91
   7  -1   4  101.18    9.64
  -7   1  -4  107.82   10.25
   7   1   4  111.50    9.77
  -7  -1  -4   93.82   11.66
  -7  -1  -4  115.30   10.05
  -6  -4  -1   15.08    4.14
  -6  -4  -1    1.04    4.96
  -6  -4  -1   15.09    3.61
  -6  -4  -1   11.17    4.45
  -6   4  -1   -2.00    3.39
  -6   4  -1    2.01    6.90
   6   4   1    4.62    4.01
  -5   4   5   11.42    8.96
   5   4  -5    7.42    1.58
  -5   4   5   11.88    2.16
   5   4  -5    7.97    2.46
   5  -4  -5    9.60    5.92
  -5   4   5    9.04    3.23
   3  -3  -7   25.74   12.10
   3   3  -7  109.99   11.14
   3   3  -7  193.57   11.51
   3  -3  -7   39.14   10.79
   3  -3  -7   29.78   11.94
  -3   3   7   24.56   11.94
  11   0  -3   18.67    3.56
 -11   0   3    4.62    4.50
 -11   0   3    8.06    5.25
  11   0  -3    8.05    6.12
  11   0  -3    8.52    7.19
 -11   0   3    8.15    6.08
   0   0  -8    7.69    4.74
   0   0  -8   10.29    6.36
   0   0   8   12.62    3.60
   0   0  -8   13.50    6.44
  -9  -3   3  162.45   12.86
  -9   3   3  152.97   13.63
  -9  -3   3  175.66   13.74
   9  -3  -3  184.86   13.36
  -9  -3   3  154.27   12.96
   9  -3  -3  168.95   14.01
  -9  -3   3  164.20   13.04
  -9  -3   2   32.40    3.83
  -9   3   2   31.95    5.08
  -9  -3   2   42.03    3.72
  -9  -3   2   41.45    5.34
   9  -3  -2   43.45    5.21
   9   3  -2   42.17    5.25
  -9  -3   2   37.10    4.31
   9  -3  -2   28.67    4.16
   3   5   0   13.42    5.20
   3   5   0    3.14    4.47
  -3   5   0    3.63    7.08
   3   5   0    7.61    6.99
  -3   5   0    1.93    2.90
   3  -5   0    2.47    3.95
  -3  -5   0    3.48    4.17
  -4  -3   7  296.53   23.94
   4   3  -7  311.97   23.96
   4   3  -7  331.33   24.22
  -4  -3   7  290.90   24.66
   4   3  -7  286.22   24.15
  -4   3   7  299.00   24.54
   4  -3  -7  278.46   25.38
   4  -3  -7  314.96   25.11
   4  -3  -7  299.85   23.83
   9   2  -6    0.92    4.65
  -9   2   6    1.16    0.74
  -9  -2   6    2.30    1.52
   9   2  -6    0.71    0.78
  -9   2   6    2.99    1.91
  -9  -2   6    1.24    1.07
   9  -2  -6    2.35    4.51
  -9   2   6    4.36    6.96
   9   2  -6    0.78    0.85
   9   2  -6    1.87    1.76
  -7  -4   1   -1.36    2.44
   7   4  -1   -4.35    3.08
  -7  -4   1   -0.29    3.27
  -7  -4   1    1.43    3.46
  -7   4   1    0.21    3.11
   7  -4  -1    4.01    3.82
  -7   4   1   -3.87    6.82
   1  -5   2  244.13   21.37
  -1   5  -2  222.95   20.19
  -1   5  -2  266.03   19.98
   1  -5   2  234.60   19.65
  -1   5  -2  223.69   20.79
   1   5   2  255.73   22.21
  -1  -5  -2  245.42   20.46
  -9  -2  -1  247.37   19.44
   9   2   1  227.84   20.41
  -9  -2  -1  240.44   19.69
   9   2   1  257.13   19.53
  -9   2  -1  206.79   20.53
   9  -2   1  233.12   19.67
  -7   4   3   32.06    8.57
   7  -4  -3   35.93    6.05
  -7   4   3   39.65    4.56
   7  -4  -3   40.40    4.05
  -7  -4   3   48.01    4.65
  -2   3   7   98.26   10.06
   2   3  -7  102.86    8.55
   2  -3  -7   92.24    9.94
   2   3  -7   95.67    8.22
   2  -3  -7   68.04   10.07
   2   3  -7   81.79    8.26
  -2  -3   7   82.99    9.73
  -2  -3   7   96.77    8.16
   2  -3  -7   94.83    8.27
 -11   0   4  507.15   41.48
 -11   0   4  515.71   41.08
  11   0  -4  537.14   41.16
  11   0  -4  498.27   40.67
 -11   0   4  564.56   41.13
  11   0  -4  508.51   41.67
   7   1  -8   34.52    4.18
   7  -1  -8   38.97    5.77
   7   1  -8   30.65    3.24
  -7  -1   8   35.21    4.43
   7  -1  -8   33.61    6.18
   7   1  -8   25.31    4.99
   7   1  -8   31.42    3.45
   7   1  -8   30.06    4.82
   3   5  -2  175.52   13.69
  -3   5   2  174.69   13.66
   3   5  -2  154.22   14.68
   3  -5  -2  169.15   14.55
   3   5  -2  149.77   14.03
   3   5  -2  135.57   13.90
  -3  -5   2  165.39   13.66
  -3   5   2  173.23   16.25
 -11   0   2   33.70    4.93
  11   0  -2   30.85    7.78
 -11   0   2   34.23    6.98
  11   0  -2   30.48    4.33
  11   0  -2   35.43    6.78
 -11   0   2   36.24    6.42
  -4  -2   8  141.13   13.62
   4  -2  -8  126.82   14.46
   4  -2  -8  141.21   14.29
  -4  -2   8  199.15   12.76
   4  -2  -8  158.49   12.76
   4   2  -8  147.42   13.09
  -4   2   8  127.22   12.96
   4   2  -8  167.20   13.48
   4   2  -8  136.50   13.90
   4   2  -8  148.58   13.13
  -9  -1   7   55.10    6.65
   9   1  -7   51.90    5.39
  -9   1   7   53.51    6.68
  -9   1   7   50.65    8.70
   9   1  -7   50.50    5.77
   9  -1  -7   49.37    6.62
  -9   1   7   55.02    7.07
  -9  -1   7   50.80    6.10
   9   1  -7   50.65    4.43
  -9  -1   7   56.60    5.55
  -8  -3  -1   55.01    5.69
  -8  -3  -1   58.76    7.18
  -8  -3  -1   59.20    7.34
  -8   3  -1   47.03    6.55
   8  -3   1   53.47    6.17
   8   3   1   66.49    6.62
  -8  -3  -1   56.88    6.28
  -8   3  -1   41.21    8.85
  10   2  -1   39.50    6.66
  10  -2  -1   42.01    4.95
 -10   2   1   36.84    7.08
 -10  -2   1   35.20    6.41
 -10  -2   1   35.86    4.50
 -10   2   1   24.90    7.55
 -10  -2   1   38.73    4.27
  10   2  -1   33.85    4.27
  10   1  -6   -5.33    5.27
  10  -1  -6    0.17    1.06
 -10  -1   6   -0.41    3.29
  10  -1  -6   -0.86    4.02
 -10  -1   6   -3.34    4.02
  10   1  -6   -0.88    2.24
 -10   1   6   -0.23    4.75
 -10   1   6    1.82    6.08
 -10  -1   6    2.20    1.88
 -10   1   6    0.40    5.21
 -10  -1   6    0.39    3.54
   3  -2  -8  243.25   21.94
   3  -2  -8  253.77   20.79
   3   2  -8  243.61   20.99
   3   2  -8  257.63   20.82
   3   2  -8  224.88   21.57
  -3  -2   8  286.14   20.55
   3   2  -8  246.55   20.74
   3  -2  -8  281.48   21.90
  -3  -2   8  222.72   21.19
  -3   2   8  267.03   20.96
   9  -1   2   83.97    8.24
  -9  -1  -2   92.13    8.40
   9   1   2   86.83    8.17
  -3  -4  -4  478.15   38.11
  -3  -4  -4  447.36   38.24
  -3  -4  -4  503.37   37.89
  -3   4  -4  451.71   37.68
   3  -4   4  487.83   37.64
  -3   4  -4  452.65   38.49
   5   3  -7  198.94   17.53
  -5   3   7  214.24   17.92
  -5  -3   7  221.42   17.92
   5   3  -7  222.37   17.50
   5  -3  -7  205.34   19.00
   5  -3  -7  204.64   18.63
   5   3  -7  200.06   17.81
   5   3  -7  228.06   17.34
  -5   3   7  225.54   17.20
   5   3  -7  211.81   17.57
  -6   1  -5    0.76    4.53
  -6   1  -5    0.76    7.16
   6  -1   5   -1.67    3.90
  -6  -1  -5    1.31    7.20
   6   1   5   -0.61    4.01
   8  -2  -7   15.78    5.49
   8   2  -7   14.03    2.52
  -8   2   7   15.84    8.75
   8   2  -7   13.17    2.04
   8   2  -7   14.64    2.34
  -8  -2   7   16.33    2.20
   8   2  -7   14.22    3.87
  -1   4  -5  597.49   48.02
   1  -4   5  603.83   47.82
  -1   4  -5  577.41   48.32
  -1  -4  -5  606.71   48.76
  -1  -4  -5  625.10   47.97
  -1   4  -5  610.21   47.83
   1  -4   5  592.38   48.72
  -1  -4  -5  624.71   48.58
   9  -3  -4   49.70    4.74
   9  -3  -4   43.11    6.38
  -9   3   4   46.31    5.43
  -9   3   4   52.98    9.24
  -9  -3   4   63.00    5.38
  -3   0  -7   -9.63    7.53
  -3   0  -7   -2.63    4.40
  -9  -3   1   45.62    5.87
  -9  -3   1   43.35    4.91
  -9  -3   1   40.71    5.71
   9  -3  -1   37.22    5.22
  -9   3   1   28.93    5.61
  -9  -3   1   50.52    4.52
   9   3  -1   42.22    5.98
  -5  -2   8  142.64    9.26
   5  -2  -8  101.25   10.98
  -5   2   8   73.64    9.08
   5   2  -8  127.82    9.54
   5  -2  -8  110.41    8.95
  -5  -2   8  100.25    9.98
   5   2  -8  156.27   10.34
   5   2  -8  112.59   10.51
   5   2  -8  113.04    9.74
   5  -2  -8   78.24   11.00
 -11   1   3   45.88    7.68
  11   1  -3   26.32    6.91
 -11  -1   3   38.64    4.91
 -11  -1   3   33.38    5.50
  11  -1  -3   45.76    4.85
 -11  -1   3   37.12    5.89
  11   1  -3   35.42    4.24
  11  -1  -3   28.56    5.09
  11   1  -3   29.43    8.49
 -11   1   3   23.59    6.55
  -2   3  -6   20.14    4.48
   2  -3   6   20.84    4.08
  -2  -3  -6   20.88    5.55
  -2   3  -6   16.29    4.76
   0  -1  -8  211.04   19.77
   0  -1   8  236.36   18.45
   0   1   8  198.72   18.46
   0  -1   8  215.72   18.23
   0   1  -8  235.12   18.77
   0  -1  -8  210.69   19.44
   0   1  -8  222.13   19.02
   0  -1  -8  246.10   19.23
  -1  -5   3   16.12    7.22
  -1   5   3   20.84    3.12
   1   5  -3   10.96    4.75
   1   5  -3   14.18    6.05
   1  -5  -3   24.08    6.27
  -1  -5   3   15.83    3.33
   1   5  -3   18.32    3.48
  -1   5   3   38.14    9.79
  -2  -5   3    4.25    2.93
  -2   5   3   -0.44    2.36
   2  -5  -3   -4.60    5.87
   2   5  -3    4.84    2.91
  -2   5   3   -5.32    8.82
   2   5  -3    7.62    5.43
   2   5  -3    9.48    4.42
  -1   3   7   77.33    9.99
   1  -3  -7   84.13    8.22
  -1  -3   7   79.29    9.68
   1   3  -7   97.38    7.90
   1   3  -7   83.38    8.09
   1  -3  -7   85.56    9.83
   1  -3  -7   91.14    9.44
  -1  -3   7   80.24    7.86
   1   3  -7   86.56    7.95
  -3  -5  -1   39.37    6.29
   3   5   1   39.05    5.98
  -3   5  -1   43.34    7.84
  -3  -5  -1   42.86    4.82
   3   5   1   44.48    6.85
   3  -5   1   39.70    5.36
  -2   2   8  252.51   21.82
  -2  -2   8  275.32   22.05
   2   2  -8  268.71   21.43
   2  -2  -8  251.83   21.66
   2  -2  -8  280.63   22.95
   2   2  -8  263.94   21.58
  -2  -2   8  250.49   21.45
   2  -2  -8  269.87   22.51
  -2  -2   8  287.68   21.29
   2   2  -8  267.43   21.72
   4  -3   5   70.20    7.36
  -4  -3  -5   75.95    8.52
  -4   3  -5   71.52    7.61
  -4  -3  -5   79.83    9.31
  -4  -3  -5   80.98    8.38
  -4   3  -5   71.83    8.31
  -8   0   8   10.76    5.53
  -8   0   8   10.25    4.41
   8   0  -8   11.12    4.84
   8   0  -8   10.26    3.87
  10  -2  -5   18.28    2.43
 -10   2   5   20.37    4.75
 -10  -2   5   12.53    2.33
  10   2  -5   18.19    1.90
  10  -2  -5   17.23    4.44
 -10  -2   5   25.58    3.36
 -10   2   5   25.55    7.52
 -10  -2   5   15.68    2.48
  10   2  -5   14.80    5.78
  11   1  -4  337.60   26.54
  11   1  -4  317.38   25.23
  11  -1  -4  312.25   25.44
  11  -1  -4  304.29   25.45
 -11  -1   4  332.15   25.84
 -11  -1   4  320.44   25.76
 -11   1   4  300.82   26.01
 -11   1   4  284.42   26.54
 -11  -1   4  352.23   25.57
  11   1  -4  338.84   26.26
  10   0   1   -1.62    3.48
 -10   0  -1    0.61    4.64
 -10   0  -1    4.43    7.49
  -4   5   1  113.30    9.94
  -4   5   1  110.87   12.80
   4   5  -1   93.22   11.36
   4  -5  -1  110.01   10.76
   4   5  -1  120.70   10.63
   4   5  -1  106.13   10.26
   4   5  -1  127.78    9.87
  -4  -5   1  111.38   10.29
   7  -4   0   18.35    4.36
  -7   4   0   24.24    4.16
  -7  -4   0   25.96    4.60
  -7  -4   0   22.31    3.64
  -7  -4   0   28.50    4.65
  -7  -4   0   27.20    4.95
  -7   4   0   20.93    7.53
   7   4   0   24.28    4.02
 -11  -1   2   65.22    6.59
  11  -1  -2   69.90    6.74
  11   1  -2   72.38    6.39
 -11   1   2   70.64    8.98
  11   1  -2   60.23    8.74
 -11  -1   2   59.05    8.11
  11  -1  -2   63.01    7.11
 -11  -1   2   73.20    7.14
 -11   1   2   64.19    9.17
  -2  -5  -2   72.16    7.84
  -2   5  -2   74.19    9.39
   2  -5   2   76.13    7.15
  -2  -5  -2   72.30    6.96
  -2  -5  -2   73.44    8.52
 -11   0   5   -3.82    5.23
 -11   0   5   -3.05    4.62
 -11   0   5   -4.91    3.62
  11   0  -5   -1.34    2.93
  11   0  -5   -4.81    4.63
  11   0  -5  -12.60    7.86
   7   4  -4  641.97   48.36
   7  -4  -4  629.29   49.08
  -7   4   4  587.41   48.31
  -7   4   4  586.54   50.06
  -6   4   5    4.78    2.29
   6  -4  -5    5.85    5.76
  -6   4   5    1.21    2.71
   6   4  -5    2.54    2.24
  -6   4   5    2.12    8.14
   0   5  -3  227.99   21.23
   0   5  -3  296.17   21.10
   0  -5  -3  261.74   21.87
   0   5  -3  244.16   21.92
   0  -5   3  268.73   22.24
   0  -5   3  241.92   20.75
   5   0   6   -0.26    3.91
  -5   0  -6   -2.08    7.63
  -5   0  -6    1.99    4.45
   4   5  -2   77.05    8.21
   4   5  -2   69.63    8.84
   4   5  -2   84.57    7.56
  -4  -5   2   87.38    7.59
   4  -5  -2   84.48    9.07
  -4   5   2  101.18    7.79
   4   5  -2   70.33    7.94
  -4   5   2   63.15   10.84
   3   5  -3  210.22   17.95
  -3  -5   3  211.87   17.11
  -3   5   3  187.89   19.91
   3   5  -3  194.02   17.53
  -3   5   3  201.22   17.16
   3   5  -3  202.38   17.39
   3   5  -3  257.60   17.45
   3  -5  -3  197.25   18.43
  11   0  -1   -1.54    3.23
 -11   0   1    0.19    6.85
 -11   0   1   -4.61    5.22
   6   2  -8  278.41   21.89
   6   2  -8  258.40   21.57
  -6  -2   8  267.21   21.75
   6   2  -8  282.63   21.52
   6  -2  -8  262.67   23.01
   6   2  -8  275.72   21.57
   6  -2  -8  256.21   22.65
   6   2  -8  274.46   22.03
   4  -5   0   20.53    4.53
  -4  -5   0   28.59    3.93
   4   5   0   18.58    5.63
  -4   5   0   17.07    8.00
   4   5   0   15.37    7.45
  -4  -5   0   22.65    4.84
  -4   5   0   19.35    3.66
   4   5   0   21.24    4.76
  -4   2  -6   67.78    7.66
   4  -2   6   72.18    7.07
  -4   2  -6   68.02    8.13
  -4  -2  -6   67.54    8.84
   6   3  -7   44.92    4.84
  -6  -3   7   40.56    5.06
   6   3  -7   46.18    4.55
   6   3  -7   55.44    4.96
  -6   3   7   42.23    5.37
   6   3  -7   50.04    4.78
   6  -3  -7   51.88    7.74
  -3   1  -7   -3.00    6.41
  -3   1  -7    2.50    4.23
  -3  -1  -7    0.60    7.24
  -3  -1  -7   -3.43    5.07
  -3  -1  -7   -2.77    6.86
  -2   2  -7    7.92    4.50
  -2   2  -7    8.94    4.29
  -2  -2  -7    1.43    6.73
   2  -2   7    6.30    3.92
  -2  -2  -7   10.52    5.80
  -2  -2  -7    6.25    5.55
  -3  -4   6  206.22   18.10
   3   4  -6  214.60   17.22
   3   4  -6  207.50   17.40
   3   4  -6  213.27   17.34
  -3  -4   6  243.68   17.16
   3  -4  -6  181.34   18.33
  -3   4   6  192.11   17.83
   3  -4  -6  210.48   17.06
   3  -4  -6  166.64   18.61
  -1   0  -8   39.02    6.13
  -1   0  -8   42.86    8.09
  -1   0  -8   30.09    7.66
  -8   3   6    8.29    1.90
   8  -3  -6    8.47    5.77
  -8   3   6    4.65    8.29
   8   3  -6    5.31    4.28
   8   3  -6    8.24    2.24
   2   4  -6   10.76    4.50
   2   4  -6    9.43    4.35
  -2  -4   6   11.33    6.58
   2   4  -6   10.51    4.91
   2  -4  -6   87.53    9.11
  -2  -4   6   11.89    4.29
   2  -4  -6   28.81    8.10
   8   1  -8    0.96    4.04
   8   1  -8    1.46    1.77
  -8  -1   8    1.56    3.46
   8   1  -8   -1.67    3.36
   8  -1  -8    3.56    5.27
 -10   1  -1   18.15    7.81
 -10   1  -1    8.73    5.57
 -10  -1  -1    6.38    6.74
 -10  -1  -1   12.56    3.92
  10   1   1    9.98    3.47
  10  -1   1   10.51    3.56
  -1   2   8  243.29   22.53
   1  -2  -8  294.98   23.41
  -1  -2   8  268.77   22.04
   1  -2  -8  307.74   23.07
   1   2  -8  262.00   22.13
   1  -2  -8  264.01   22.36
   1   2  -8  279.74   22.29
  -4  -4   6  101.93   10.57
   4   4  -6  112.57    9.83
   4   4  -6  112.70   10.25
  -4   4   6  122.51    9.65
   4  -4  -6  133.14   11.65
  -4  -4   6  115.63    9.66
  -4   4   6  123.91   11.23
   4  -4  -6  113.77   12.29
  11  -1  -5   44.12    9.80
  11   1  -5   45.03    7.35
 -11  -1   5   47.57    5.18
 -11  -1   5   44.12    5.94
  11   1  -5   44.36    4.48
  11  -1  -5   42.58    5.36
 -11  -1   5   57.14    5.64
 -11   1   5   39.07    5.54
 -11   1   5   43.35    6.95
 -11   1   5   43.49    7.98
 -10  -2   0    7.93    5.83
  10   2   0   25.63    3.90
  10  -2   0   19.08    4.24
 -10   2   0   13.41    7.27
 -10  -2   0   27.82    3.86
  10   2   0   25.91    6.84
 -10  -2   0   20.10    3.92
 -10   2   0   12.91    7.32
  -1  -5  -3  366.62   28.89
  -1   5  -3  333.96   28.38
  -1   5  -3  355.41   28.13
  -1   5  -3  324.61   29.09
  -1  -5  -3  371.99   28.05
  -1  -5  -3  353.06   28.64
   1  -5   3  352.96   29.40
   1  -5   3  330.89   27.96
   6   4   2   26.63    4.60
  -6  -4  -2   16.89    6.07
  -6   4  -2   15.64    7.57
  -6  -4  -2   22.84    4.91
  -6  -4  -2   23.05    5.37
  -6  -4  -2   21.77    4.25
  -9   3   5  192.73   16.78
  -9   3   5  204.54   19.21
   9  -3  -5  186.09   17.63
  -9  -3   5  228.17   16.83
   5  -4   3    3.91    3.75
  -5   4  -3    5.32    6.86
  -5  -4  -3   -0.88    4.48
  -5  -4  -3   -2.61    5.35
  -5  -4  -3    3.44    5.84
   0  -3   7  108.19    9.43
   0  -3  -7  104.25   10.83
   0  -3  -7   96.77   11.19
   0  -3  -7  101.00    9.96
   0   3  -7  106.79    9.63
   0   3  -7  107.62    9.83
   0   3   7  107.50   11.69
  -9   3   0  255.49   26.45
  -9  -3   0  318.68   25.53
   9   3   0  324.02   25.38
   9  -3   0  301.09   25.16
  -9  -3   0  330.17   25.06
  -9   3   0  280.03   25.36
  -9  -3   0  327.78   24.75
  -5  -1  -6  121.63   12.11
  -5   1  -6  142.14   12.08
  -5  -1  -6  134.82   13.66
  -5   1  -6  122.45   13.55
   5   1   6  151.13   11.78
   5  -1   6  118.69   11.61
 -10   0   7   -3.10    4.87
 -10   0   7   -5.16    5.80
  10   0  -7   -0.49    0.77
 -10   0   7   -3.92    4.34
  10   0  -7    2.80    3.92
 -11  -1   1   35.26    5.19
 -11   1   1   48.62    7.83
  11  -1  -1   37.00    5.10
  11   1  -1   29.16    7.51
 -11   1   1   44.43    8.11
 -11  -1   1   33.56    4.64
 -11  -1   1   38.46    7.02
  11   1  -1   36.70    4.39
   8  -2   3   12.22    4.23
  -8  -2  -3   15.09    4.98
  -8  -2  -3   15.43    6.93
   8   2   3   15.23    4.10
  -8   2  -3   10.26    5.93
  -2  -4  -5   27.20    5.55
  -2   4  -5   37.85    5.05
  -2  -4  -5   38.40    7.30
  -2  -4  -5   39.20    6.86
   2  -4   5   38.13    4.79
  -2   4  -5   35.37    6.71
  -4   0   9    0.50    1.99
   4   0  -9    2.83    5.12
   4   0  -9   -1.69    5.18
   4   0  -9   -2.42    6.04
  -7  -2  -4  103.25   11.14
  -7   2  -4   95.61   10.24
   7  -2   4  105.84    9.30
  -7  -2  -4  105.22    9.82
  -7   2  -4   84.25   10.89
   4   5  -3   -3.06    4.54
  -4  -5   3   -1.19    2.34
   4   5  -3    0.09    2.57
  -4   5   3   -6.53    8.64
  -4   5   3   -3.46    2.84
   1   4  -6  350.45   31.35
  -1  -4   6  362.55   31.07
   1   4  -6  386.04   31.09
  -1   4   6  371.45   32.11
   1  -4  -6  475.33   31.29
  -1  -4   6  389.08   31.94
   1   4  -6  384.91   31.31
  -5   0   9    1.61    1.66
   5   0  -9    0.71    4.65
   5   0  -9    2.06    4.97
   5   0  -9   -0.17    5.40
  -3   0   9    1.15    2.39
   3   0  -9    8.23    5.25
   3   0  -9    3.50    6.27
   3   0  -9    3.95    5.73
  -1  -1  -8  336.88   26.68
  -1   1  -8  302.71   25.95
  -1   1  -8  316.01   25.62
   1  -1   8  316.59   25.36
  -1  -1  -8  280.97   26.23
  -1  -1  -8  322.80   25.89
   8  -4  -2   86.29    9.27
  -8   4   2   82.14   11.80
  -8   4   2   93.10    8.90
  -8  -4   2   98.30    8.01
  -8  -4   2  113.32    9.07
  -3  -5  -2    0.28    5.21
  -3  -5  -2    5.58    3.38
   3  -5   2    2.54    3.46
  -3  -5  -2   -2.11    5.76
  -3   5  -2    2.83    6.71
  -7  -3  -3  183.02   13.94
  -7  -3  -3  157.11   14.51
  -7  -3  -3  163.05   14.79
  -7   3  -3  137.14   14.91
   7  -3   3  141.42   13.32
   4  -5   1   13.73    4.21
  -4  -5  -1   14.85    5.19
  -4   5  -1    8.11    3.19
   4   5   1   13.79    6.22
  -4  -5  -1   15.28    3.34
  -4  -5  -1   10.85    4.72
  -4   5  -1    5.88    7.08
   4   5   1    8.92    4.77
   7   2  -8   76.61    7.08
   7  -2  -8   78.88    9.20
   7   2  -8   72.88    6.57
   7   2  -8   70.44    6.79
  -7  -2   8   83.01    6.91
   7  -2  -8   71.98    8.34
   7   2  -8   79.21    7.19
   8  -4  -3  444.75   36.12
   8  -4  -3  470.81   36.92
  -8  -4   3  490.79   36.44
  -8   4   3  444.37   36.42
  -8   4   3  430.02   38.25
  -5  -4   6    6.36    3.28
  -5   4   6   -1.71    4.14
  -5   4   6   -8.74    9.92
   5  -4  -6   -3.31    6.12
   5   4  -6    1.73    2.75
   5   4  -6   -0.28    1.98
  -5   4   6   -3.01    1.97
   5  -5  -1  155.13   13.94
  -5  -5   1  174.35   13.59
   5   5  -1  150.85   14.64
  -5  -5   1  164.74   13.45
  -5   5   1  166.96   16.09
  -5   5   1  150.86   13.36
  -7   4  -1   97.29   10.25
  -7  -4  -1  108.47   10.50
  -7  -4  -1  125.83   10.93
  -7  -4  -1  111.36    9.78
   7   4   1  117.79   10.13
  -7  -4  -1  131.56   10.54
  -7   4  -1  101.51   12.64
  -4   4  -4   17.71    6.87
  -4   4  -4    8.96    4.15
   4  -4   4   12.52    4.04
  -4  -4  -4   11.80    6.45
  -4  -4  -4    8.23    4.76
  -4  -4  -4   12.24    5.67
   5   5  -2  619.07   47.23
  -5  -5   2  590.20   47.09
  -5   5   2  596.71   47.25
  -5   5   2  566.51   48.88
   5   5  -2  592.10   47.55
   9   2  -7   40.90    3.82
  -9  -2   7   42.55    3.64
   9   2  -7   48.26    5.63
   9  -2  -7   46.53    6.82
  -9   2   7   52.94    9.43
   9   2  -7   36.22    3.55
  -6   3  -4  326.50   29.72
  -6  -3  -4  408.55   30.62
  -6  -3  -4  347.27   30.10
  -6   3  -4  353.48   30.37
  -6  -3  -4  411.30   29.97
 -11   0   6   66.70    7.69
 -11   0   6   81.44    7.53
  11   0  -6   63.40    6.52
 -11   0   6   68.29    8.37
 -11   0   6   72.50    6.16
   7  -3  -7  117.39   10.70
  -7  -3   7   90.75    8.03
   7   3  -7  126.55    8.55
  -7   3   7   73.34    8.36
   7   3  -7  122.32    8.87
  -7   3   7  116.55   13.74
 -10   2   6   94.44   11.78
  10  -2  -6  106.20    9.72
  10   2  -6  103.82    9.97
 -10  -2   6   90.23    8.15
 -10  -2   6   91.31    8.00
 -10  -2   6  120.87    8.42
 -10  -2   6   99.87    8.12
  -9  -2  -2  268.47   25.51
  -9  -2  -2  313.20   24.73
   9   2   2  307.16   24.51
   9  -2   2  324.50   24.66
  -9   2  -2  267.37   25.52
   8   0   4    6.76    4.07
  -8   0  -4    8.20    7.71
  -3   3  -6   36.24    5.89
  -3  -3  -6   34.23    6.81
   3  -3   6   29.23    4.73
  -3   3  -6   29.85    5.35
   6   0  -9   -4.15    3.60
  -6   0   9   -0.34    4.53
   6   0  -9    3.79    4.90
   6   0  -9   -2.06    5.34
  -6   0   9    1.12    1.11
   2   5  -4  316.43   25.80
   2   5  -4  265.96   26.18
  -2  -5   4  316.59   25.43
  -2  -5   4  334.33   26.62
  -2   5   4  275.20   28.18
   2   5  -4  343.66   25.85
  -2   5   4  327.68   25.42
   2  -5  -4  317.77   26.73
  -7   4   5  175.95   13.97
   7  -4  -5  166.96   15.53
  -7   4   5  170.64   13.95
   7   4  -5  173.86   14.07
  -7   4   5  162.32   17.35
  -8   3  -2  164.47   15.42
  -8  -3  -2  175.54   15.95
  -8  -3  -2  192.25   15.30
   8  -3   2  169.50   15.01
  -8   3  -2  171.41   16.87
  -8  -3  -2  191.96   16.07
  10  -1  -7   15.26    4.82
 -10  -1   7    8.43    3.60
 -10   1   7    5.64    7.02
 -10   1   7    8.92    5.21
 -10   1   7   14.55    5.67
  10   1  -7    1.72    3.01
 -10  -1   7   -6.71    5.00
 -10  -1   7   10.29    4.16
  10   1  -7    5.18    1.62
  -9   0   8  440.51   33.13
  -9   0   8  420.28   32.81
   9   0  -8  403.54   32.89
  -9   0   8  366.80   33.77
  -8   4   1  110.33   13.76
  -8  -4   1  142.05   11.38
  -8  -4   1  136.51   11.56
   8  -4  -1  129.44   11.80
  -8   4   1  119.35   11.74
  -8  -4   1  139.73   10.98
   4   1  -9   36.60    5.96
   4  -1  -9   37.59    5.17
  -4  -1   9   33.64    5.54
   4  -1  -9   34.84    6.90
   4   1  -9   21.52    4.69
  -4   1   9   23.06    3.27
   4   1  -9   25.22    4.88
   4   1  -9   34.80    6.91
   4  -1  -9   46.85    6.62
  -4  -1   9   23.97    3.37
  -6  -2  -5   -9.05    5.62
  -6   2  -5   -6.70    5.20
  -6  -2  -5   -9.61    8.10
  -6  -2  -5   -2.47    7.06
  -6   2  -5   -8.27    6.62
   1  -5  -4    4.82    6.32
   1   5  -4    9.63    6.00
   1   5  -4    8.40    4.70
  -1  -5   4    9.37    3.34
   1   5  -4    8.18    3.50
  -1  -5   4    4.50    6.88
  -9   0  -3    0.76    4.42
   9   0   3   -1.30    3.88
  11   2  -3   59.72    5.42
 -11   2   3   68.66    9.29
 -11  -2   3   52.31    6.94
 -11  -2   3   63.73    5.66
  11  -2  -3   61.51    6.37
  11  -2  -3   56.44    5.84
 -11  -2   3   54.67    5.60
 -11   2   3   56.53    7.94
 -11   0   0  263.94   23.16
  11   0   0  270.93   21.68
 -11   0   0  263.16   22.33
   2   0  -9    6.61    6.34
  -2   0   9    3.28    2.87
   2   0  -9   -7.40    6.59
   2   0  -9   -2.51    5.41
  -5  -1   9  166.42   13.26
   5  -1  -9  180.14   14.80
   5  -1  -9  209.26   14.72
   5  -1  -9  173.23   12.85
   5   1  -9  162.51   12.88
   5   1  -9  173.33   14.16
   5   1  -9  167.85   13.65
  -5  -1   9  145.06   12.36
   5   1  -9  160.27   13.10
  -5   1   9  137.55   12.27
   0  -2   8   -1.14    4.15
   0   2  -8    3.29    4.44
   0   2  -8    0.69    4.08
   0  -2  -8    6.28    5.73
   0  -2  -8   -4.38    5.61
   0  -2  -8    0.23    6.79
   0   2   8   -7.51    6.54
  -3   5   4  247.04   19.81
   3   5  -4  214.13   20.52
   3  -5  -4  252.38   21.52
   3   5  -4  275.61   20.13
  -3  -5   4  234.50   19.76
  -3   5   4  293.99   24.24
  -2   5  -3   61.11    6.15
  -2  -5  -3   67.41    8.27
   2  -5   3   45.60    6.01
  -2  -5  -3   57.58    5.89
  -2   5  -3   50.90    8.90
  -2  -5  -3   58.04    7.81
   0   4  -6  460.23   35.27
   0  -4  -6  459.92   35.20
   0   4  -6  450.82   35.03
   0  -4   6  438.07   35.03
   0  -4   6  427.05   35.95
   0   4  -6  391.40   35.34
   3   1  -9    1.22    4.42
  -3  -1   9   10.61    2.64
   3   1  -9    5.78    6.48
   3  -1  -9   -1.26    5.77
  -3   1   9    8.42    2.83
   3   1  -9    5.96    5.02
   3  -1  -9    7.73    5.25
   3  -1  -9    6.07    6.63
  -5  -5   0   56.53    5.91
  -5  -5   0   49.89    5.45
  -5   5   0   45.07    5.44
  -5   5   0   53.70    8.99
  -5  -5   0   62.02    6.64
   5  -5   0   43.55    6.05
   5   5   0   49.99    6.02
   5   5   0   49.15    7.13
  10  -3  -3   -1.58    4.13
 -10  -3   3    0.92    4.01
 -10   3   3    3.24    4.32
 -10   3   3    2.66    7.72
  10  -3  -3   -2.84    2.92
 -10  -3   3    2.71    1.77
  11  -2  -4    1.90    2.62
 -11  -2   4    1.47    3.13
 -11  -2   4    1.07    3.88
 -11  -2   4   -9.90    1.59
 -11   2   4    8.03    5.68
  11   2  -4   -1.86    2.18
  11  -2  -4    3.60    3.99
 -11   2   4    6.48    7.53
  -7   0  -5  -19.77    8.53
   7   0   5  -15.83    4.77
  -4   0  -7   -1.97    4.79
   4   0   7    1.08    4.09
  -4   0  -7   -0.84    7.84
 -11  -2   2  130.59   11.70
 -11  -2   2  146.81   12.93
  11   2  -2  142.86   11.61
 -11   2   2  122.12   14.33
  11  -2  -2  130.78   12.06
  11  -2  -2  135.79   11.92
 -11   2   2  118.98   13.49
 -11  -2   2  158.29   11.58
  -8   4   4  117.89   10.27
  -8  -4   4  122.49   10.34
  -8   4   4  114.79   13.89
   8  -4  -4  120.52    9.89
   8  -4  -4  127.47   11.72
  -5   5   3    2.00    2.93
  -5   5   3   -5.72    8.65
   5   5  -3    0.80    2.60
   5   5  -3   -3.48    4.10
 -10   3   2    7.67    4.91
  10  -3  -2    4.52    4.01
 -10  -3   2   12.83    2.45
 -10  -3   2    5.55    4.40
 -10  -3   2    8.68    3.15
 -10  -3   2    8.83    4.11
  10  -3  -2    5.27    3.06
  -1  -3  -7   65.97    8.61
  -1   3  -7   59.49    7.13
  -1  -3  -7   72.09    9.44
   1  -3   7   75.15    6.99
  -1   3  -7   63.51    7.33
  -1  -3  -7   71.61    7.92
   0   5  -4   15.48    6.57
   0  -5  -4    9.64    5.57
   0  -5   4   15.52    3.75
   0  -5  -4    4.88    6.53
   0   5  -4   13.10    4.95
   0   5  -4   21.76    3.68
   0  -5  -4   13.68    3.35
   0  -5   4   18.21    7.31
 -11  -1   6  617.04   44.32
 -11  -1   6  625.17   44.39
 -11   1   6  574.20   45.43
  11  -1  -6  559.88   44.51
 -11  -1   6  549.68   44.10
  11   1  -6  532.94   44.03
 -11  -1   6  548.47   44.58
  -8  -1  -4  144.53   11.55
   8   1   4  130.61   11.13
   8  -1   4  117.90   11.11
  -8  -1  -4  116.41   13.30
  -8   1  -4   90.83   13.57
   6   1  -9   72.99    6.21
   6   1  -9   66.69    4.22
  -6  -1   9   73.27    3.39
   6  -1  -9   49.73    6.49
   6   1  -9   66.31    5.96
   6   1  -9   66.71    4.97
  -6  -1   9   75.29    5.30
   6  -1  -9   56.64    6.84
  -9   1   8    3.55    8.15
  -9  -1   8    0.79    4.88
   9   1  -8   -1.17    1.64
  -9  -1   8    5.21    5.87
   9  -1  -8    0.15    5.31
   9   1  -8    0.88    3.91
  -9  -1   8    1.82    3.56
  -5  -3  -5  403.04   29.47
  -5  -3  -5  359.43   29.53
   5  -3   5  346.55   28.79
  -5   3  -5  338.10   29.11
  -5  -3  -5  364.76   30.03
  -5   3  -5  350.45   29.46
  -6   4   6  240.18   22.37
  -6   4   6  254.79   18.63
   6  -4  -6  220.84   20.26
  -6   4   6  203.19   18.89
   6   4  -6  223.28   18.81
  -2   0  -8  114.09   12.82
  -2   0  -8  122.55   11.27
  -2   0  -8  107.93   12.62
 -10  -3   4  402.01   30.85
 -10   3   4  370.10   32.56
 -10   3   4  357.18   30.92
  10  -3  -4  415.79   31.22
  10  -3  -4  379.53   30.48
   4   5  -4   -1.69    4.37
   4   5  -4   -1.49    2.90
  -4  -5   4    1.67    2.18
  -4   5   4   -3.15    2.77
   9   1   3   32.55    5.03
   9  -1   3   27.34    4.95
  -9  -1  -3   30.88    8.57
  -9  -1  -3   30.16    5.35
  -7   0   9    4.20    6.75
   7   0  -9    1.84    4.83
  -7   0   9   -1.85    4.76
   7   0  -9   -2.75    5.21
  -3   2  -7  222.74   19.34
  -3   2  -7  237.68   19.00
  -3  -2  -7  248.02   19.51
  -3  -2  -7  238.60   20.47
   3  -2   7  217.24   18.72
  -3  -2  -7  196.68   19.64
 -11   1   0  121.77   12.55
  11  -1   0  121.93   11.01
 -11  -1   0  135.73   11.29
  11   1   0  126.79   10.84
 -11   1   0  118.10   13.08
 -11  -1   0  118.54   12.60
  -2   1   9   -1.16    3.36
   2  -1  -9   -4.46    6.58
   2   1  -9   -1.54    5.13
   2  -1  -9   -3.10    5.76
   2   1  -9    4.75    6.70
   2   1  -9    1.95    4.93
   2  -1  -9   -2.32    5.82
  -2  -1   9    3.00    2.80
  10   0   2   -1.02    3.77
 -10   0  -2    3.49    4.61
  -9   3   6    6.19    1.62
   9   3  -6    6.96    2.26
   9   3  -6   10.55    5.08
   9  -3  -6    3.99    5.45
  -9   3   6   13.69    8.54
  12   0  -3   -2.75    3.49
 -12   0   3   -0.73    4.49
 -12   0   3   -2.33    5.85
  12   0  -3    5.89    5.80
 -12   0   3   10.53    5.65
  12   0  -3   -4.81    7.82
  -9   3  -1    3.34    5.09
  -9  -3  -1    3.77    5.68
  -9  -3  -1   -0.60    4.42
   9   3   1   11.97    5.38
   9  -3   1   -0.12    4.15
  -9   3  -1   -0.81    7.96
  -9  -3  -1    6.21    3.48
  -8   4   0   53.61   10.01
  -8  -4   0   68.30    6.13
  -8   4   0   52.48    7.00
   8  -4   0   55.11    6.79
  -8  -4   0   68.79    7.38
  -8  -4   0   72.59    6.94
  -3  -4  -5   74.05    9.36
  -3   4  -5   69.98    8.84
  -3  -4  -5   77.57    7.98
  -3  -4  -5   82.23    8.98
   3  -4   5   66.43    7.21
  -3   4  -5   65.01    7.37
   8  -2  -8   68.19    9.01
   8   2  -8   74.11    6.62
  -8   2   8   81.14   11.88
   8   2  -8   80.29    7.14
  -8  -2   8   78.60    6.75
  12   0  -4    0.19    7.52
  12   0  -4    2.65    5.25
  12   0  -4    3.60    2.97
 -12   0   4    8.06    4.98
 -12   0   4   -1.56    5.64
 -12   0   4    4.18    4.95
  10  -2   1   59.80    6.77
  10   2   1   65.63    6.46
 -10  -2  -1   65.13    6.92
 -10   2  -1   54.87    9.37
  -7   1  -5   12.19    5.09
  -7  -1  -5   12.15    8.03
   7   1   5    4.93    4.29
  -7   1  -5   19.28    8.37
   7  -1   5   11.92    4.28
  -7  -1  -5   11.98    4.89
   1   0  -9   -3.72    7.24
   1   0  -9   -3.08    6.84
   1   0  -9    2.92    5.69
  -1   0   9   -0.85    3.37
  -4  -1  -7    0.22    7.88
  -4  -1  -7   10.87    5.32
  -4   1  -7    9.34    4.76
  -4   1  -7    8.54    7.20
  -4  -1  -7   16.50    7.46
  -4   5  -2  275.79   28.73
  -4  -5  -2  364.96   28.15
  -4  -5  -2  368.75   27.91
  -4  -5  -2  377.53   27.43
   4  -5   2  291.92   27.26
  -4  -3   8  317.62   20.51
   4   3  -8  247.47   19.97
  -4   3   8  180.84   19.54
   4  -3  -8  212.57   18.68
   4   3  -8  237.25   19.17
   4  -3  -8  170.96   20.23
   4   3  -8  345.72   19.53
   4  -3  -8  188.43   20.26
 -11   2   5  102.00   12.60
 -11   2   5   97.90   10.41
  11   2  -5  116.63   11.71
 -11  -2   5  116.35    9.70
 -11  -2   5  118.79    9.34
 -11  -2   5  103.75    9.21
  11  -2  -5  120.14   10.27
 -10  -3   1  257.87   21.70
  10  -3  -1  262.45   21.47
 -10  -3   1  280.42   21.00
 -10  -3   1  258.55   21.95
 -10  -3   1  254.50   21.21
 -10   3   1  244.92   21.99
   3   3  -8  270.37   23.73
   3  -3  -8  272.11   25.02
  -3  -3   8  364.30   23.77
   3  -3  -8  243.69   24.90
   3   3  -8  344.68   23.73
   3  -3  -8  247.55   23.46
   3   3  -8  326.45   23.88
  -3  -3   8  292.58   24.67
  -3   3   8  212.00   24.46
  -5   2  -6  412.60   31.30
  -5  -2  -6  367.62   31.91
  -5   2  -6  362.84   31.54
  -1  -4  -6   34.83    6.99
  -1   4  -6   31.80    5.07
  -1   4  -6   27.05    5.81
  -1  -4  -6   27.90    7.39
   1  -4   6   31.44    4.67
  -1  -4  -6   32.34    5.34
  -1   5  -4   39.50    7.60
  -1  -5  -4   21.92    7.52
  -1  -5  -4   24.85    6.70
  -1  -5  -4   23.28    4.38
  -1   5  -4   37.05    4.79
   1  -5   4   37.62    4.83
 -11   2   1   54.78    9.55
 -11  -2   1   70.77    6.37
 -11   2   1   64.02    9.56
  11   2  -1   58.86    8.75
  11   2  -1   65.67    6.34
  11  -2  -1   64.83    7.02
 -11  -2   1   65.90    6.58
 -11  -2   1   68.58    8.18
  -8   3   7  146.15   14.52
   8  -3  -7  137.11   12.09
   8   3  -7  148.37    9.93
  -8   3   7   71.74    9.60
  -8   3   7  129.28    9.49
   8   3  -7  128.43   10.56
  -5  -5  -1   20.84    5.05
   5   5   1   12.82    4.77
  -5   5  -1    5.47    3.66
  -5  -5  -1    9.64    5.45
   5  -5   1    1.86    4.01
   5   5   1    3.57    6.53
  -5   5  -1    0.78    7.45
  -2  -1  -8    3.07    7.37
  -2   1  -8   10.25    7.31
  -2   1  -8    2.07    4.96
  -2  -1  -8    1.48    5.58
  -2  -1  -8    0.20    7.30
   2  -1   8   10.17    4.49
  -6  -5   2  226.50   16.08
  -6   5   2  180.94   16.29
  -6   5   2  168.87   19.07
   6   5  -2  177.88   16.72
  12   0  -2  424.24   33.48
 -12   0   2  404.05   34.49
 -12   0   2  427.20   34.32
  -7  -1   9    4.24    4.06
   7  -1  -9   10.07    6.26
   7   1  -9    6.17    2.35
   7   1  -9    3.36    4.44
   7   1  -9    4.96    3.55
   7   1  -9   10.12    4.75
   7  -1  -9    2.51    5.70
  -6   0  -6  444.90   36.09
   6   0   6  455.03   35.88
  -6   0  -6  435.94   37.07
   5   3  -8  371.82   30.38
   5   3  -8  388.04   30.04
  -5  -3   8  377.20   30.44
   5  -3  -8  360.73   31.50
  -5   3   8  361.86   30.28
   5   3  -8  383.05   30.07
   5  -3  -8  380.60   31.22
 -10   1  -2  339.26   30.93
 -10   1  -2  381.30   30.24
 -10  -1  -2  379.61   29.71
  10  -1   2  366.24   29.53
  10   1   2  362.29   29.48
  -6   5   1  399.44   35.91
   6   5  -1  410.40   34.96
  -6  -5   1  430.28   34.20
  -6  -5   1  450.10   34.25
  -6   5   1  426.71   34.26
  -3  -5  -3  563.54   44.29
  -3   5  -3  576.65   44.38
  -3  -5  -3  537.66   44.85
   3  -5   3  545.38   44.30
  -3  -5  -3  586.97   44.76
  -3   5  -3  509.09   45.36
  -6  -4  -3   -4.28    5.43
  -6   4  -3   10.63    7.38
  -6  -4  -3    5.89    5.86
  -6  -4  -3   -1.41    5.08
   6  -4   3    2.88    4.12
  -1  -2  -8   -2.71    7.14
  -1   2  -8   -0.16    4.78
  -1   2  -8    3.33    4.48
  -1  -2  -8   -3.97    5.82
  -1  -2  -8    0.40    5.96
   1  -2   8    2.68    4.04
 -12  -1   3  109.99    9.13
  12  -1  -3  108.00    9.10
 -12   1   3   92.04   10.66
 -12  -1   3   96.60   10.13
  12  -1  -3   91.25    9.20
 -12   1   3   99.11   11.25
  12   1  -3   92.98    8.55
 -12  -1   3   95.09    9.32
   2  -3  -8  652.25   52.37
  -2  -3   8  624.12   53.05
   2   3  -8  686.68   52.29
  -2  -3   8  682.82   52.40
  -2   3   8  598.41   52.88
   2  -3  -8  671.43   53.47
   2   3  -8  656.19   52.51
   2   3  -8  680.69   52.51
   2  -3  -8  659.02   53.23
   5   5  -4  105.17    9.51
  -5   5   4  119.44    9.56
  -5   5   4  105.80   13.86
 -12   0   5   -1.62    4.96
  12   0  -5   -0.20    8.24
 -12   0   5   -3.98    5.88
  12   0  -5   -1.63    3.02
 -12   0   5   -6.24    4.27
  12  -1  -4   88.57    8.71
 -12  -1   4  102.49    9.38
  12   1  -4   94.17   11.21
 -12   1   4   84.72   10.04
 -12  -1   4  107.31    9.04
 -12  -1   4   92.96    9.28
  12   1  -4   98.34    8.30
 -12   1   4   89.75   10.94
 -10  -3   5   14.24    3.09
 -10   3   5   19.27    8.46
  10  -3  -5    4.64    4.88
 -10   3   5    9.77    3.89
   1   1  -9   -5.74    6.88
  -1   1   9    2.03    3.78
   1  -1  -9    8.23    6.71
   1   1  -9   -2.38    4.82
   1  -1  -9   -3.47    6.62
   1   1  -9   -1.61    5.93
   1  -1  -9   -0.38    5.63
   8   4  -5   69.86    6.01
  -8   4   5   60.48    6.05
   8  -4  -5   69.58    8.38
  -8   4   5   63.95    5.77
  -7  -4  -2   20.52    4.96
  -7  -4  -2   19.72    5.30
  -7   4  -2    5.22    7.61
  -7   4  -2   17.91    4.86
  -7  -4  -2   18.31    5.74
 -11   0   7   -3.71    5.03
 -11   0   7   -0.32    4.77
 -11   0   7   -3.80    6.05
  11   0  -7   -0.09    3.51
  -6   5   3   33.31    4.60
   6   5  -3   45.49    4.49
  -6   5   3   41.93    9.83
  -8   0   9   15.93    6.87
   8   0  -9    0.58    5.47
  -8   0   9    5.13    4.97
   8   0  -9    1.65    4.74
  -7   4   6   -0.22    2.11
  -7   4   6   -2.15    3.07
   7  -4  -6    2.26    6.65
   7   4  -6    0.89    2.36
  -5   4  -4  248.64   20.48
  -5   4  -4  212.91   21.51
   5  -4   4  238.23   20.22
  -5  -4  -4  245.56   20.74
  -5  -4  -4  250.89   21.40
  -5  -4  -4  271.53   21.02
 -10  -2   7    2.45    1.50
  10   2  -7   -0.58    1.86
  10  -2  -7   -2.13    5.02
 -10   2   7    6.39    7.93
 -10  -2   7    3.04    2.15
 -10   0   8  123.25   11.06
  10   0  -8  106.68   10.90
 -10   0   8  135.41   11.52
 -10   0   8  131.50   12.41
  -4   2   9  403.20   33.28
   4   2  -9  442.48   33.84
   4   2  -9  429.38   33.48
   4   2  -9  423.78   33.58
   4  -2  -9  464.45   33.40
   4  -2  -9  430.65   34.52
   4   2  -9  431.02   34.22
  -4  -2   9  406.90   33.86
   4  -2  -9  390.22   34.59
  -4  -2   9  396.01   33.18
   6   3  -8   70.10    4.92
   6   3  -8   46.26    4.29
   6   3  -8   20.94    4.94
  -6  -3   8   61.65    5.85
  -6   3   8    9.63    4.77
   6  -3  -8   14.83    7.45
   6   3  -8   31.95    4.75
   6  -3  -8    3.86    6.66
 -12  -1   2   -0.49    4.13
 -12  -1   2    1.91    3.82
  12   1  -2   -5.38    7.22
  12  -1  -2    1.04    3.75
 -12   1   2    4.31    6.84
  12   1  -2    0.89    3.20
 -12   1   2   11.21    7.20
 -12  -1   2   -2.27    6.21
  -4  -3  -6    8.49    7.62
  -4   3  -6   -9.74    5.09
   4  -3   6   -0.12    3.94
  -4  -3  -6   20.19    6.45
  -4   3  -6    7.15    5.19
  -4  -3  -6   11.46    6.04
  -6   1  -6   74.60    7.82
   6   1   6   73.82    7.62
  -6   1  -6   49.98   10.44
   6  -1   6   68.48    7.41
  -6  -1  -6   65.57   10.50
   3   4  -7   29.36    5.40
  -3   4   7    8.54    8.10
  -3  -4   7   41.99    5.36
   3   4  -7   38.67    5.55
   3  -4  -7   71.52    5.46
   3  -4  -7   80.73    9.34
   3  -4  -7  103.43    9.43
  -3  -4   7   31.15    7.27
  -2   3  -7  112.46   10.84
   2  -3   7  126.29   10.68
  -2  -3  -7  115.41   11.44
  -2   3  -7  112.45   10.93
  -5  -2   9  118.37    5.91
   5   2  -9   38.35    7.66
   5  -2  -9   29.48    8.13
   5   2  -9  102.61    6.73
   5  -2  -9   18.37    8.43
   5   2  -9   58.49    7.27
  -5  -2   9   51.54    7.23
  -5   2   9   20.76    5.34
 -11   0  -1   -4.58    5.06
  11   0   1    1.89    3.85
 -11   0  -1    1.40    7.73
  -6   5   0   26.93    4.48
  -6  -5   0   31.95    4.49
   6  -5   0   19.14    5.24
  -6   5   0   33.63    9.02
  -6  -5   0   30.85    4.16
  -6  -5   0   26.03    5.40
  -6  -5   0   28.01    4.88
  -2  -5   5   66.86    8.47
  -2   5   5  151.23    8.68
   2   5  -5   46.95    9.46
   2   5  -5   59.69    8.51
   2  -5  -5   83.21   12.07
  -2  -5   5   63.41   10.31
   2  -5  -5  136.67   11.15
  -9   4   3   45.09    5.66
   9  -4  -3   46.43    6.58
   9  -4  -3   45.73    4.81
  -9  -4   3   47.73    4.07
  -9  -4   3   62.05    5.61
  -9   4   3   58.92    9.89
   9  -4  -2  241.72   20.34
  -9  -4   2  266.65   20.21
  -9  -4   2  243.14   19.37
  -9   4   2  223.46   22.12
  -9   4   2  232.89   20.16
   4  -4  -7  173.38   17.47
  -4   4   7  185.91   15.21
   4  -4  -7  186.65   17.18
   4   4  -7  205.23   15.57
   4   4  -7  187.17   15.74
  -4   4   7  132.01   16.25
  -4  -4   7  200.41   16.37
  -4  -4   7  203.68   15.41
   3   2  -9   98.63    7.73
   3   2  -9   50.60    9.02
   3  -2  -9   53.54    9.44
   3  -2  -9   46.53    7.37
   3  -2  -9   61.03    8.98
   3   2  -9   68.56    8.05
  -3  -2   9  121.42    7.10
  -3   2   9   34.66    7.08
  -3   5   5  189.96   14.99
   3   5  -5  137.61   15.54
  -3   5   5  203.94   19.78
  -3  -5   5  179.04   16.41
  -3  -5   5  190.32   14.94
   3   5  -5  189.60   15.44
   0   0  -9   17.48    7.45
   0   0  -9    4.82    5.37
   0   0  -9   -2.78    7.60
 -12  -1   5   30.95    5.20
  12   1  -5   31.17    3.74
 -12  -1   5   26.51    5.70
 -12   1   5   33.13    5.32
  12  -1  -5   30.16    4.47
 -12   1   5   37.38    7.65
 -12  -1   5   23.84    4.66
   2  -4  -7  239.82   20.35
  -2  -4   7  224.65   18.89
  -2  -4   7  221.48   19.95
   2   4  -7  233.96   19.18
   2  -4  -7  257.08   18.97
   2  -4  -7  242.94   20.69
  -2   4   7  201.38   20.29
   2   4  -7  219.29   19.07
  -1   3   8   47.73    9.23
   1  -3  -8   55.12    8.50
   1   3  -8   56.85    6.35
  -1  -3   8   49.96    6.15
   1  -3  -8   60.73    9.28
   1  -3  -8   56.81    6.75
   1   3  -8   52.34    6.40
   1   5  -5  524.17   41.08
   1  -5  -5  511.86   41.73
   1   5  -5  460.76   41.43
   1  -5  -5  524.50   42.08
   1  -5  -5  546.05   40.84
  -1  -5   5  504.13   40.82
  -1  -5   5  498.53   41.72
 -12   0   1   -9.43    7.93
  12   0  -1  -13.01    4.13
 -12   0   1   -5.52    5.87
  -2   5  -4   27.69    4.92
   2  -5   4   17.61    4.64
  -2  -5  -4   35.84    7.20
  -2  -5  -4   40.79    5.10
  -2  -5  -4   40.03    6.88
  -2   5  -4   28.31    7.64
  11   1  -7  406.78   33.68
 -11  -1   7  407.04   34.25
 -11  -1   7  463.31   34.00
 -11  -1   7  475.94   34.14
 -11   1   7  418.96   35.26
  11  -1  -7  424.09   34.23
 -10   3   0  203.21   19.86
 -10  -3   0  217.53   19.81
  10  -3   0  227.00   19.36
 -10  -3   0  249.96   18.92
 -10  -3   0  247.34   20.05
 -10  -3   0  240.54   19.23
  -8  -4  -1  244.14   19.86
  -8  -4  -1  250.67   19.05
   8  -4   1  213.46   19.43
  -8  -4  -1  250.94   19.84
  -8   4  -1  211.37   19.53
  -8  -4  -1  253.80   19.55
  -8   4  -1  205.32   21.23
 -11  -2   6   10.51    2.35
 -11  -2   6   15.29    2.57
  11  -2  -6   14.83    5.16
 -11  -2   6   14.03    2.31
 -11   2   6    7.29    8.00
 -11  -2   6   10.62    2.76
  -8  -1   9   96.98    8.34
   8   1  -9   83.37    8.56
   8   1  -9   91.75    8.97
   8  -1  -9   94.14    9.93
   8  -1  -9   81.28    9.27
  -8  -2  -4   35.02    8.05
  -8   2  -4   29.00    8.30
  -8   2  -4   28.03    6.59
  -8  -2  -4   43.34    6.20
   8  -2   4   32.67    5.50
   8   2   4   38.63    5.34
   6   2  -9   40.18    5.23
   6  -2  -9   40.12    7.80
   6   2  -9   45.62    4.00
  -6   2   9   30.38    2.58
  -6  -2   9   48.19    4.99
   6   2  -9   43.75    5.87
  -6   2   9   29.57    2.66
   6  -2  -9   53.06    7.34
   5   4  -7  675.28   52.18
  -5   4   7  675.26   51.77
   5  -4  -7  660.14   52.92
  -5   4   7  612.65   52.34
   5  -4  -7  649.74   53.38
  -5  -4   7  631.84   52.14
  -4  -5   5   29.53    3.02
  -4   5   5   24.35   11.31
  -4   5   5   18.68    3.14
  -4   5   5   17.85    4.97
   4   5  -5   21.04    3.93
 -10   1   8  105.28   12.97
 -10  -1   8  126.02   10.50
 -10  -1   8  115.15   11.31
  10  -1  -8  113.31   11.52
  10   1  -8  123.71   10.45
 -10  -1   8  121.28   11.10
  -9  -2   8  355.01   30.76
   9  -2  -8  399.64   32.18
  -9   2   8  362.85   33.44
   9   2  -8  429.64   30.89
  -8  -3  -3   62.12    8.61
  -8   3  -3   45.60    9.03
   8  -3   3   54.06    6.61
  -8  -3  -3   60.92    7.09
  -8  -3  -3   64.52    8.73
  -7   3  -4   94.90   10.24
  -7  -3  -4   96.85   10.61
  -7   3  -4   74.38    9.37
  -7  -3  -4   99.95    9.43
  -7  -3  -4   73.64    9.99
   9   2   3    5.71    4.31
  -9   2  -3    1.49    5.98
   9  -2   3    0.90    4.35
  -9  -2  -3  -10.52    7.49
  -9  -2  -3    1.77    4.69
  -9   4   4   40.51    5.20
   9  -4  -4   43.90    6.73
  -9  -4   4   51.35    5.20
  -9  -4   1   14.24    4.51
  -9  -4   1   12.65    2.99
  -9  -4   1   19.67    4.74
   9  -4  -1   11.31    4.52
  -9   4   1    9.65    8.50
  -9   4   1    3.26    4.56
  -9  -4   1   12.77    3.99
   2  -4   6   94.24    8.89
  -2   4  -6   84.17    9.83
  -2  -4  -6   99.10   11.05
  -2   4  -6   88.88    9.04
  -2  -4  -6   95.97    9.49
  -2  -4  -6  107.66   10.56
 -11  -2   0    1.72    3.64
  11  -2   0    6.45    4.24
 -11  -2   0    5.30    6.23
 -11  -2   0   -2.30    3.84
  11   2   0   -1.49    3.73
 -11   2   0    0.26    7.38
  11   2   0    5.10    6.98
 -11   2   0    6.93    8.18
   2   2  -9  137.47   13.94
   2  -2  -9  160.24   14.31
  -2   2   9  137.46   12.44
   2   2  -9  138.48   12.37
   2  -2  -9  140.77   13.71
   2  -2  -9  132.83   12.72
   2   2  -9  152.06   12.85
 -11   1  -1   12.95    8.12
 -11  -1  -1   -0.69    7.39
 -11  -1  -1    0.13    4.23
  11   1   1    1.72    3.81
  11  -1   1    0.12    3.97
 -11   1  -1    1.65    6.07
  -3   0  -8    9.24    5.37
  -3   0  -8    5.30    8.55
 -12   0   6  114.98   11.67
 -12   0   6  120.08   10.07
 -12   0   6  137.11   10.96
 -12   0   6  130.91   11.24
  12   0  -6  109.81   10.17
  -6  -5   4    0.73    1.27
   6   5  -4    1.66    2.84
  -6   5   4   -0.33    2.77
  -6   5   4   -2.94    9.09
   6  -5  -4    2.61    5.85
   1  -4  -7    7.93    3.68
  -1  -4   7    6.09    3.66
   1   4  -7   10.67    4.00
  -1  -4   7    2.76    6.63
   1   4  -7    6.93    3.64
   1   4  -7    0.70    4.35
   0   1  -9   20.32    7.36
   0   1  -9   15.36    7.78
   0  -1  -9   18.31    8.08
   0   1  -9   26.55    5.71
   0  -1  -9   16.83    7.56
   0  -1  -9   29.76    6.62
  -4   4  -5  118.23   11.85
   4  -4   5  114.44   11.49
  -4  -4  -5  138.67   13.49
  -4  -4  -5  153.09   12.60
  -4   4  -5  125.92   12.89
  -4  -4  -5  156.30   12.92
  -5  -5  -2   29.08    6.23
  -5   5  -2   32.13    8.77
  -5  -5  -2   37.30    6.19
  -5  -5  -2   28.84    5.22
   5  -5   2   26.85    5.04
  -5   5  -2   34.75    5.13
  -7   3   8   19.79    1.97
   7   3  -8   27.16    3.18
   7  -3  -8   14.44    7.17
   7   3  -8   20.10    3.87
  -7   3   8   19.64    3.10
  -7  -3   8   29.89    3.78
  -7   3   8   36.14   11.34
  -7  -2  -5    0.22    7.58
  -7   2  -5    9.38    5.90
  -7  -2  -5   15.28    5.41
   7  -2   5    0.40    4.82
  -7   2  -5    8.70    7.19
  -7  -2  -5   10.55    7.69
   5   0   7   -1.01    4.81
  -5   0  -7   -8.60    5.33
  -5   0  -7   -4.37    8.53
   4  -2   7   86.96    8.54
  -4   2  -7   90.40    9.02
  -4   2  -7   76.00   10.02
  -4  -2  -7   77.39   10.57
   0  -5  -5   93.47   10.42
   0  -5  -5  108.55    8.60
   0   5  -5   79.98   10.02
   0  -5   5   78.67    8.41
   0  -5  -5   95.53   11.07
   0   5  -5   86.82    8.63
  12  -1  -1    6.04    4.06
 -12  -1   1    0.78    6.52
 -12   1   1    9.78    7.87
 -12   1   1    7.69    6.92
  12   1  -1   10.13    3.59
 -12  -1   1    4.92    4.31
  -9   3   7   32.25    4.34
   9   3  -7   64.07    6.71
  -9   3   7   52.74    4.55
   9   3  -7   72.24    4.96
   9  -3  -7   69.53    8.14
  -9   3   7   62.84   10.69
  -4   5  -3   43.88    9.00
  -4  -5  -3   37.22    5.75
  -4  -5  -3   43.54    7.27
  -4  -5  -3   42.09    7.08
   4  -5   3   48.78    5.87
  10  -3  -6    5.21    5.34
 -10   3   6    5.94    8.39
  10   3  -6   -2.36    2.33
  -9   3  -2   -2.63    5.69
  -9  -3  -2   -9.44    6.74
  -9   3  -2   -2.70    7.36
  -9  -3  -2   -8.19    5.19
  -9  -3  -2    2.01    6.46
   9  -3   2    0.27    4.40
   0   6   0   18.77    8.63
   0  -6   0   29.48    5.75
  -7  -5   2   13.74    2.60
  -7   5   2   11.98    8.93
  -7   5   2   15.75    3.61
  -6  -3  -5   16.94    7.47
  -6   3  -5    9.65    6.20
  -6  -3  -5   16.63    6.05
  -6  -3  -5   13.09    6.62
  -6   3  -5   11.20    5.95
  -2   2  -8  245.31   21.70
  -2  -2  -8  244.25   22.77
   2  -2   8  257.78   21.17
  -2  -2  -8  271.80   22.01
  -2   2  -8  278.96   21.43
  -2  -2  -8  223.20   22.00
  -9   0   9  -10.60    8.54
  -9   0   9    2.43    5.05
  -9   0   9   -5.70    6.51
   9   0  -9    5.58    5.17
  -6  -5  -1  283.09   22.57
  -6   5  -1  267.14   22.33
  -6  -5  -1  285.41   22.40
  -6  -5  -1  294.90   22.52
   6  -5   1  241.72   22.30
  -6   5  -1  256.35   24.25
  -6  -5  -1  278.04   21.99
   7   2  -9   15.04    2.83
   7   2  -9   17.89    4.43
   7   2  -9   14.00    4.72
   7  -2  -9   13.29    6.98
  -7  -2   9   20.34    4.02
   7  -2  -9   10.58    6.17
  -5   5   5   39.94    5.61
  -5   5   5   39.56   11.64
  -5   5   5   49.45    4.75
   5   5  -5   43.20    5.00
   5  -5  -5   39.69    8.08
   6  -4  -7    4.24    6.93
   6   4  -7    6.97    3.35
  -6  -4   7    3.04    2.82
  -6   4   7    9.02    2.26
  -6   4   7    8.24    4.64
  11  -3  -3  300.81   25.29
 -11  -3   3  333.18   24.60
 -11   3   3  235.52   25.58
 -11   3   3  307.42   27.18
 -11  -3   3  323.57   25.38
   0  -3  -8   64.12    8.17
   0  -3  -8   62.02    9.33
   0  -3  -8   75.78   10.14
   0   3  -8   77.29    7.69
   0   3  -8   68.61    7.55
   0  -3   8   69.89    7.16
 -10  -2  -2  127.09   12.63
 -10   2  -2  109.12   14.72
  10   2   2  134.55   12.41
  -9   0  -4  495.72   37.77
  -9   0  -4  401.13   38.74
   9   0   4  474.10   37.48
   1   6   0   37.83    9.05
  -1   6   0   44.83    5.10
  -1   6   0   39.71    8.90
  -1  -6   0   45.96    6.37
   1  -6   0   35.35    6.35
  -3  -1  -8   24.51    8.29
  -3  -1  -8   21.31    8.42
   3  -1   8   26.48    5.31
  -3   1  -8   17.75    8.31
  -3  -1  -8   40.47    6.51
  -3   1  -8   26.09    6.01
 -12  -1   6  179.27   14.94
 -12  -1   6  210.54   15.36
 -12   1   6  173.16   17.03
 -12   1   6  167.21   14.87
 -12  -1   6  189.85   15.74
  12   1  -6  180.54   14.81
  12  -1  -6  190.08   15.39
 -12  -1   6  198.90   15.50
  -7  -5   1   14.09    3.31
  -7  -5   1   21.39    4.10
  -7   5   1   18.20    8.80
  -7   5   1    8.88    3.98
  -7  -5   1   20.20    4.70
 -12  -2   3    8.44    5.36
 -12   2   3    6.40    7.17
 -12   2   3   -3.45    8.17
 -12  -2   3    8.07    3.48
 -12  -2   3   10.48    3.26
  12  -2  -3    5.65    4.29
  12   2  -3    8.43    2.99
  -8   4   6   54.11    5.96
   8   4  -6   67.61    5.99
  -8   4   6   71.81    5.94
   8  -4  -6   63.81    9.04
   0  -6   1  170.50   14.10
   0   6   1  166.36   16.80
   0   6   1  154.08   13.47
   0   6  -1  160.26   16.07
   0  -6  -1  168.44   14.79
  -1  -6   1  113.21   10.22
  -1   6   1  108.14    9.69
  -1   6   1  106.34   13.48
   1   6  -1  107.62   12.47
   1  -6  -1  108.97   11.21
  -7   5   3   82.17   11.76
  -7  -5   3   61.70    5.64
   7  -5  -3   80.33    8.39
  -7   5   3   86.02    6.82
  12  -2  -4   98.96    9.49
 -12   2   4   87.22   11.73
 -12  -2   4  102.38    9.73
 -12  -2   4  109.92    9.11
 -12  -2   4  107.11    8.79
 -12   2   4   88.02   10.88
 -11   3   4   61.73    8.08
 -11  -3   4   90.03    6.96
 -11  -3   4   72.79    5.57
 -11  -3   4   66.60    5.46
  11  -3  -4   83.20    7.66
 -11   3   4   63.52   10.54
 -11  -3   4   53.88    5.43
  -1   2   9    4.89    5.33
   1   2  -9    3.19    5.05
  -1  -2   9    9.14    4.37
   1  -2  -9    1.47    6.75
   1  -2  -9    6.57    5.53
   1  -2  -9   13.98    7.69
   1   2  -9    4.17    4.70
  -5   1  -7   22.72    8.98
  -5   1  -7   23.15    5.74
  -5  -1  -7   34.57    6.39
  -5  -1  -7   24.79    8.86
  -5  -1  -7   29.97    8.96
  -8   0  -5    0.25    8.82
   8   0   5   30.60    5.20
 -11  -3   2    0.46    3.52
 -11  -3   2   11.82    5.12
 -11   3   2   13.74    9.21
 -11   3   2   11.74    7.07
 -11  -3   2   -0.91    4.77
 -11  -3   2   -1.82    3.00
  10   0   3    9.60    4.71
 -10   0  -3    6.54    5.13
   9   4  -5   -0.16    2.31
   9  -4  -5   -0.18    5.59
   0  -4   7   19.34    4.36
   0  -4  -7   20.79    4.80
   0   4  -7   13.26    4.97
   0   4  -7   11.01    4.39
  -1   0  -9   -0.56    5.54
  -1   0  -9   -2.13    7.37
  -1   0  -9   -1.36    7.82
  -9  -4   0   40.38    6.10
  -9  -4   0   45.78    5.60
  -9  -4   0   45.04    4.73
  -9   4   0   30.54    5.70
   9  -4   0   30.11    5.55
  -9   4   0   33.32    9.50
  -1  -6  -1  783.85   61.27
   1   6   1  778.53   62.24
   1  -6   1  762.90   60.85
   1   6   1  782.36   60.66
  -1   6  -1  719.19   61.89
   2  -6  -1    8.94    5.73
  -2  -6   1   25.79    4.90
  -2   6   1    3.99    8.68
  -2   6   1   13.25    3.64
   2   6  -1   34.19    8.15
   2   6  -1   13.71    3.47
  -3  -5  -4   42.09    7.70
  -3   5  -4   30.54    8.35
  -3   5  -4   30.42    5.35
  -3  -5  -4   36.09    5.52
   3  -5   4   39.79    5.31
  -3  -5  -4   42.09    7.14
  -2  -6   0  151.34   13.74
   2   6   0  137.71   15.53
  -2   6   0  165.12   13.14
  -2   6   0  135.50   15.63
   2  -6   0  145.99   13.56
  -1  -5  -5    1.95    6.72
   1  -5   5   13.25    4.12
  -1   5  -5    9.39    4.07
  -1  -5  -5    7.99    4.13
  -1  -5  -5   16.50    7.18
  -1   5  -5    9.94    6.68
  -9  -1   9   12.16    4.12
  -9   1   9    0.29    9.56
   9   1  -9    9.66    4.85
   9  -1  -9    6.08    6.13
   5   0 -10    2.89    6.17
   5   0 -10    4.85    6.67
  -5   0  10    4.62    2.19
 -12   0   0  228.90   19.84
 -12   0   0  243.84   21.25
  12   0   0  234.67   19.25
 -12   2   2  406.39   44.77
 -12  -2   2  605.32   44.70
 -12  -2   2  550.63   43.87
  12  -2  -2  531.56   44.11
 -12  -2   2  590.21   43.78
  12   2  -2  590.00   43.80
 -12   2   2  488.35   45.27
  -6   2  -6  501.71   41.44
  -6  -2  -6  570.61   41.69
  -6   2  -6  478.00   41.97
  -6  -2  -6  495.99   42.07
  -6  -2  -6  526.98   42.51
   3  -3   7  201.69   16.33
  -3   3  -7  199.18   16.65
  -3   3  -7  167.65   16.51
  -3  -3  -7  200.61   17.38
   4   0 -10  634.85   41.32
   4   0 -10  590.59   40.86
   4   0 -10  524.47   40.44
  -9  -1  -4  162.61   16.98
   9  -1   4  169.74   14.55
  -9   1  -4  129.80   17.10
  -9  -1  -4  177.92   14.81
   9   1   4  172.26   14.54
  -7  -4  -3  327.47   25.67
  -7   4  -3  263.74   26.37
  -7  -4  -3  302.42   25.35
  -7  -4  -3  308.42   25.21
   1   6  -2   47.85    5.06
  -1  -6   2   41.53    5.06
  -1   6   2   29.67    4.42
  -1   6   2   14.16   10.16
   1  -6  -2   27.26    7.16
   1   6  -2   31.80    8.22
 -12  -2   5   54.29    6.14
 -12  -2   5   58.20    5.51
 -12   2   5   45.98    7.58
 -12   2   5   60.26    9.79
  12  -2  -5   55.45    6.75
 -12  -2   5   67.34    5.90
 -11   0   8   50.43    7.24
  11   0  -8   41.61    5.93
 -11   0   8   49.05    6.51
 -11   0   8   45.92    7.97
  -8  -3   8   75.53    6.40
   8  -3  -8   93.16   10.15
   8   3  -8  104.18    7.07
  -8   3   8  101.21   13.16
  -8  -3   8   50.59    6.54
  10  -3   1  181.29   15.75
 -10   3  -1  158.75   17.80
 -10  -3  -1  177.40   16.66
 -10  -3  -1  198.34   15.84
 -10   3  -1  189.57   16.88
   6   0 -10   31.16    6.55
   6   0 -10   29.63    6.89
  -6   0  10   19.07    2.31
  -7  -5   0  307.38   24.22
  -7   5   0  293.78   24.14
  -7   5   0  244.27   25.90
  -7  -5   0  300.37   24.05
  -7  -5   0  305.14   24.20
  -7  -5   0  289.85   23.69
  -8  -1  -5    7.10    5.47
   8   1   5   12.81    5.28
  -8   1  -5   19.21    6.23
  -8   1  -5    1.21    9.59
   8  -1   5    7.83    5.66
   0  -6   2   25.36    4.62
   0   6   2   21.15    3.52
   0   6   2   12.58    9.34
   0  -6  -2   22.21    6.69
   0   6  -2   21.61    4.31
   0   6  -2   21.59    7.73
 -10  -1  -3   10.38    4.73
  10  -1   3    8.06    4.59
 -10   1  -3    8.54    5.95
  10   1   3    8.12    4.45
   3   0 -10   98.22    9.61
   3   0 -10   88.64    9.93
  -3   0  10   74.60    7.33
   3   0 -10   89.51   10.57
 -11  -2   7  431.93   35.28
 -11   2   7  515.38   37.62
  11   2  -7  503.46   35.30
  11  -2  -7  500.45   36.28
 -11  -2   7  420.68   35.28
 -11  -2   7  416.45   35.15
 -11   3   5    3.04    5.32
  11  -3  -5    1.88    5.18
 -11   3   5    5.09    8.68
 -11  -3   5    1.41    3.40
  -2  -6   2  296.05   23.69
  -2   6   2  247.80   23.53
  -2   6   2  244.70   26.01
   2   6  -2  363.51   23.86
   2   6  -2  341.06   25.01
   2  -6  -2  250.41   24.52
   7   5  -4   16.85    3.40
  -7   5   4    4.03    9.36
  -7   5   4    5.40    3.03
   7  -5  -4    2.78    6.11
  -6   4  -4   16.14    5.34
  -6   4  -4   10.24    7.69
  -6  -4  -4   16.50    6.88
  -6  -4  -4    8.84    6.11
   6  -4   4    9.03    4.77
  -6  -4  -4    7.67    5.86
   6   5  -5  235.49   12.25
  -6   5   5  200.06   12.22
  -6   5   5  264.36   12.16
  -6   5   5  208.27   16.98
   6  -5  -5  198.79   14.40
   7  -4  -7   28.36    7.96
  -7   4   7   42.71    3.80
   7   4  -7   36.36    4.40
  -7   4   7   31.39    5.13
  -1   1  -9   21.39    8.26
  -1  -1  -9   36.97    8.34
  -1  -1  -9   24.23    6.64
  -1  -1  -9   22.15    8.54
  -1   1  -9   27.05    6.06
   8  -2  -9   36.26    7.89
   8   2  -9   42.65    4.27
   8  -2  -9   34.16    6.60
  -8  -2   9   43.97    4.86
  -5   3  -6    5.89    5.55
  -5  -3  -6   14.08    8.31
   5  -3   6    5.40    4.52
  -5   3  -6    3.03    5.65
  -5  -3  -6   20.17    7.21
  -5  -3  -6   29.87    6.83
  -3   4  -6  663.44   53.17
  -3  -4  -6  690.65   53.00
  -3  -4  -6  718.85   53.77
  -3   4  -6  623.42   52.89
  -3  -4  -6  725.28   53.48
   3  -4   6  634.60   52.60
  -2   6  -1  112.09   10.67
  -2  -6  -1  167.66   12.29
  -2   6  -1  106.16   13.45
   2   6   1  158.45   15.09
   2  -6   1   95.72   10.76
  -7   0  -6    5.72    8.86
  -7   0  -6   -1.04    4.99
   7   0   6    1.77    4.73
  -8  -4  -2   -3.37    5.66
  -8  -4  -2   -2.16    6.23
  -8   4  -2    4.22    4.79
  -8   4  -2    0.59    8.45
  -8  -4  -2   -4.22    6.00
 -11  -3   1   80.78    9.34
  11  -3  -1   81.58    8.40
 -11   3   1   61.58    9.85
 -11  -3   1   94.43    7.64
 -10   2   8  852.65   66.85
  10   2  -8  853.16   64.84
 -10  -2   8  803.69   64.75
  10  -2  -8  842.53   65.88
   3   6  -1  109.50    9.17
   3  -6  -1   92.96   10.25
  -3   6   1  111.03   13.02
  -3  -6   1   91.78    9.49
   3   6  -1   85.45   11.46
  -3   6   1  110.57    9.41
 -12   0   7   -1.78    5.07
 -12   0   7    0.72    6.23
  12   0  -7   -3.67    3.71
 -12   0   7    0.12    5.23
 -13   0   4  487.68   40.06
  13   0  -4  501.98   39.12
 -13   0   4  481.18   39.63
  -5   1  10   44.84    4.56
   5  -1 -10   87.30    8.39
   5   1 -10   68.59    7.51
   5   1 -10   45.67    6.57
   5   1 -10   61.48    8.10
   5  -1 -10   57.05    8.36
  -5  -1  10   45.04    4.68
 -11   0  -2  101.55   10.19
 -11   0  -2   89.70   12.50
  11   0   2  102.54    9.47
  12  -1   0   10.86    4.13
 -12  -1   0   16.05    4.70
 -12   1   0    6.74    6.64
 -12  -1   0    8.63    7.67
  12   1   0   12.11    4.07
 -12   1   0   11.87    8.46
  13   0  -3   46.92    5.26
 -13   0   3   31.22    7.63
 -13   0   3   25.78    7.50
   4   1 -10   16.33    5.80
   4   1 -10    7.16    6.62
   4  -1 -10   19.03    7.61
  -4   1  10    3.87    2.88
   4   1 -10    6.98    5.35
   4  -1 -10   13.36    6.78
  -4  -1  10   12.64    2.90
 -11   2  -1    0.65    8.81
 -11  -2  -1   -1.75    7.01
 -11   2  -1   -1.81    7.15
  11   2   1    4.21    3.86
  11  -2   1   -2.91    4.28
 -11  -2  -1    0.39    4.33
  -3  -6   0   41.40    7.05
   3  -6   0   46.24    6.45
   3   6   0   45.33   10.05
  -3   6   0   44.62   10.12
  -3   6   0   52.13    5.71
  -3   5   6   76.37    6.13
  -3  -5   6   52.40    6.10
  -3  -5   6   67.52    8.28
   3   5  -6   58.52    6.72
   3   5  -6   58.66    6.94
  -1  -3  -8  538.18   39.98
  -1  -3  -8  491.00   40.36
  -1   3  -8  477.99   39.11
   1  -3   8  493.23   38.92
  -1  -3  -8  474.48   39.41
  -1   3  -8  472.60   39.20
  -1   6  -2    3.25    7.72
  -1  -6  -2    5.78    6.27
   1  -6   2    6.93    4.35
   1   6   2   -1.22    9.66
   1   6   2    1.84    2.96
   0  -2  -9   15.17    6.42
   0  -2   9   20.25    4.96
   0   2  -9   19.22    5.80
   0  -2  -9   17.34    6.90
   0   2  -9   18.30    5.57
   0  -2  -9    7.85    7.92
 -10  -4   3  273.86   18.68
 -10  -4   3  223.53   18.59
 -10  -4   3  327.07   19.70
  10  -4  -3  267.33   19.97
 -10   4   3  271.88   19.65
 -10  -4   3  210.58   18.52
   2  -5  -6  118.31    8.08
   2   5  -6   73.73    8.68
  -2  -5   6   62.97    7.87
  -2  -5   6   87.90   10.16
   2   5  -6   83.93    8.33
  11  -1  -8  270.08   22.69
 -11   1   8  272.88   23.96
 -11  -1   8  286.22   22.52
 -11  -1   8  289.56   22.24
 -11  -1   8  248.62   22.63
   7   0 -10  671.98   51.71
   7   0 -10  623.44   51.76
  -6  -1  10  133.06    7.61
   6   1 -10  129.39   10.25
   6  -1 -10  131.83   10.98
  -6   1  10   69.11    7.22
   6   1 -10  135.02    9.96
   6  -1 -10  141.81   11.01
  -3   6   2   -2.79   10.15
  -3  -6   2   23.42    4.11
  -3   6   2    2.26    3.56
   3   6  -2   20.16    7.25
   3  -6  -2    3.85    6.16
   3   6  -2    8.32    3.41
 -12   2   1  192.44   19.22
 -12   2   1  169.58   19.33
 -12  -2   1  229.01   17.11
 -12  -2   1  215.15   16.88
  12  -2  -1  196.49   17.31
 -12  -2   1  186.99   18.26
  12   2  -1  207.75   16.92
  10  -4  -2    4.34    5.48
 -10   4   2    0.41    4.79
 -10  -4   2   12.16    2.63
 -10  -4   2   14.09    4.44
   4   5  -6  409.33   31.37
  -4   5   6  385.92   34.67
  -4   5   6  362.95   30.77
  -4  -5   6  419.51   31.63
  -4  -5   6  416.61   30.78
  -4   5   6  336.97   31.42
   3   1 -10   61.31    7.78
   3   1 -10   51.85    9.19
   3   1 -10   55.02    7.58
  -3  -1  10   57.47    5.48
  -3   1  10   49.93    5.51
   3  -1 -10   61.79    9.38
   3  -1 -10   51.72    8.45
   3  -1 -10   44.46    7.79
  -1   4  -7   24.39    5.66
  -1  -4  -7   22.13    5.23
   1  -4   7   16.04    4.78
  -1   4  -7   23.24    4.88
 -13   0   5   -4.73    6.58
  13   0  -5   -1.24    3.51
 -13   0   5  -22.07    5.48
 -13   0   5   -6.20    6.11
  -6  -5  -2   72.53    7.94
  -6  -5  -2   61.12    7.20
   6  -5   2   50.67    7.06
  -6  -5  -2   68.29    8.01
  -6   5  -2   51.04   10.43
  -6   5  -2   60.33    6.96
  -5  -5  -3   74.84    8.69
  -5  -5  -3   79.86    9.94
  -5  -5  -3   86.18    9.66
   5  -5   3   98.08    8.80
  -5   5  -3   87.69   11.68
  -2   0  10   68.07    6.87
   2   0 -10   79.94   10.35
   2   0 -10   74.62    9.78
   2   0 -10   74.13    9.17
 -10   0   9    2.76    5.09
 -10   0   9  -13.02    8.28
  10   0  -9   -4.49    5.24
 -10   0   9   -2.05    6.53
  -7  -1  -6 1062.12   84.94
  -7   1  -6 1089.09   84.08
   7  -1   6 1054.14   83.86
  -7   1  -6  946.80   84.75
   7   1   6 1117.41   83.90
  -4   0  -8  286.50   27.50
  -4   0  -8  339.83   26.54
 -10   3   7  241.25   17.36
  10  -3  -7  248.62   15.08
 -10   3   7  117.80   12.33
 -10   3   7  140.65   12.67
  10   3  -7  248.01   12.95
  -5  -4  -5  305.90   24.18
   5  -4   5  243.95   22.45
  -5   4  -5  252.28   22.89
  -5   4  -5  266.99   23.61
  -5  -4  -5  329.94   23.73
  -5  -4  -5  305.49   23.62
 -12   1   7  155.07   13.72
 -12  -1   7  150.97   11.67
 -12  -1   7  157.05   10.41
  12  -1  -7  160.93   11.57
 -12   1   7   94.24   10.05
 -12  -1   7  197.57   11.53
 -12  -1   7  184.58   11.29
  13  -1  -4    7.77    3.81
 -13  -1   4   -0.10    4.72
 -13  -1   4    5.23    4.92
 -13  -1   4   -1.53    5.23
 -13   1   4   -3.45    6.54
  13   1  -4    4.68    3.12
 -13   1   4    2.10    7.32
  -2  -5  -5   17.68    4.54
  -2  -5  -5   12.68    7.14
   2  -5   5   16.69    4.44
  -2   5  -5   22.95    4.82
  -2  -5  -5   13.44    7.56
  -2   5  -5   14.49    7.32
   4   3  -9  545.31   38.84
   4  -3  -9  478.21   39.90
   4   3  -9  513.72   39.34
  -4   3   9  446.91   38.82
   4   3  -9  443.51   38.60
  -4  -3   9  557.19   39.41
   4  -3  -9  470.60   39.73
  10  -4  -4   11.57    5.39
 -10  -4   4   11.32    3.46
 -10   4   4    4.23    3.68
 -13   0   2   45.03    7.20
  13   0  -2   41.85    5.34
 -13   0   2   47.10    8.51
 -11   1  -2    8.60    9.41
 -11   1  -2    1.81    5.88
 -11  -1  -2   -5.33    4.92
  11  -1   2   10.19    4.52
  11   1   2   -0.24    4.38
 -13   1   3    3.65    7.10
 -13  -1   3    1.45    4.55
 -13   1   3   -1.90    7.15
  13   1  -3    0.08    3.22
  13  -1  -3   -3.01    4.04
 -13  -1   3    0.52    4.50
 -13  -1   3    8.19    5.83
   1  -5  -6   99.53   11.54
  -1  -5   6   87.51    8.49
   1  -5  -6  105.15    8.49
   1  -5  -6  100.71   10.96
  -1  -5   6   91.11   10.97
   1   5  -6   93.06    8.84
   1   5  -6   72.05    9.34
  -5   3   9  190.11   19.18
   5   3  -9  246.08   19.35
   5  -3  -9  212.39   20.50
  -5  -3   9  226.69   20.14
   5  -3  -9  189.62   20.81
   5   3  -9  202.11   19.68
   3  -2   8   40.83    5.86
  -3  -2  -8   44.35    7.55
  -3  -2  -8   28.75    7.95
  -3   2  -8   28.03    6.08
  -3   2  -8   34.64    7.68
  -3  -2  -8   36.96    9.26
  12  -2  -6    4.01    4.65
 -12  -2   6    1.48    2.50
 -12  -2   6   -2.73    2.73
 -12  -2   6   -5.81    3.11
 -12   2   6    5.95    8.05
   1  -6  -3   -3.67    7.05
  -1   6   3    2.24    3.17
  -1   6   3   -4.36   10.98
  -1  -6   3   10.67    3.72
   1   6  -3    9.57    7.14
   1   6  -3   22.12    4.62
  -3   3   9   48.28    9.57
  -3  -3   9   93.23   10.98
   3  -3  -9   45.40   10.36
   3  -3  -9   41.28    7.80
   3  -3  -9   51.00   10.36
   3   3  -9  133.88    8.79
   9   4  -6   92.83    7.48
  -9   4   6   75.51    7.51
   9  -4  -6   83.02   10.05
  -9   4   6   83.83    7.30
  -8   5   2  146.90   13.58
  -8  -5   2  165.75   13.46
  -8  -5   2  159.02   12.76
   8  -5  -2  157.30   14.18
  -8   5   2  153.69   16.79
  -2   6   3  342.62   28.16
   2  -6  -3  331.11   29.46
   2   6  -3  300.69   29.23
  -2  -6   3  331.31   28.14
  -2   6   3  333.65   30.95
   2   6  -3  437.68   28.67
  -9  -4  -1  475.10   35.53
  -9  -4  -1  462.95   35.09
  -9   4  -1  402.70   35.67
   9  -4   1  436.60   35.51
  -9   4  -1  395.75   37.06
  -9  -4  -1  455.96   35.82
  -9  -4  -1  431.64   35.81
  -3   6  -1  353.50   32.09
  -3   6  -1  396.41   30.58
  -3  -6  -1  406.68   31.09
   3  -6   1  357.26   30.56
   3   6   1  366.20   32.45
   7   1 -10  253.20   21.07
  -7  -1  10  265.65   20.74
   7  -1 -10  244.48   21.78
   7  -1 -10  250.97   21.52
   7   1 -10  243.12   21.23
  -4  -6   1    0.32    4.49
  -4   6   1   -0.31    9.15
   4   6  -1   -1.48    3.08
   4  -6  -1   -2.00    5.66
  -4   6   1    4.07    3.66
   4   6  -1   -3.35    7.08
  -5  -2  -7    4.34    8.04
  -5   2  -7   -0.52    5.55
  -5   2  -7   -5.83    7.89
   5  -2   7  -13.61    5.36
  -8   5   3   43.73   10.24
  -8  -5   3   27.97    2.64
  -8   5   3   36.73    4.60
  -8  -5   3   39.39    4.71
   8  -5  -3   22.35    5.98
  -8  -5   3   25.64    2.56
  -5   5   6  264.34   22.68
  -5   5   6  245.70   26.36
   5   5  -6  275.92   22.58
  -5   5   6  281.38   22.07
   5  -5  -6  283.73   24.09
  -2   6  -2    9.18    7.76
  -2  -6  -2    0.18    6.21
   2   6   2    0.10    3.20
   2   6   2   -2.77    9.78
   2  -6   2   -0.22    4.09
  -7   5  -1   -1.77    4.13
  -7  -5  -1   11.64    5.08
  -7   5  -1   -6.82    8.78
  -7  -5  -1    0.43    4.71
  -7  -5  -1    1.22    3.86
  -7  -5  -1    5.50    5.16
   7  -5   1   -0.94    4.69
  -4   5  -4  287.58   23.79
  -4   5  -4  312.98   25.53
   4  -5   4  285.98   23.71
  -4  -5  -4  283.35   23.60
  -4  -5  -4  271.43   24.47
  -4  -5  -4  299.54   24.40
   4  -4  -8   27.81    8.83
   4  -4  -8   18.21    3.58
  -4  -4   8   22.96    6.60
   4   4  -8   22.15    4.56
  -4  -4   8   36.29    4.18
  -4   4   8    2.60    7.23
   4  -4  -8   35.88    8.41
 -13   1   5   23.37    7.64
  13   1  -5   29.91    4.01
 -13  -1   5   29.50    5.62
 -13  -1   5    7.83    5.25
 -13   1   5   15.38    5.69
 -13  -1   5   20.77    5.79
  13  -1  -5   29.41    4.58
  -2   0  -9   -4.86    5.86
  -2   0  -9    6.43    8.80
  -2   0  -9   -0.29    8.24
   0   6   3   -0.09    3.02
   0   6  -3    4.96    3.90
   0  -6   3   14.13    4.14
   0  -6  -3   -6.78    7.12
   0   6   3   -5.81   10.71
   0   6  -3   -4.62    7.54
 -10  -4   1    3.75    4.03
 -10   4   1    3.81    4.61
 -10   4   1   -1.28    8.96
 -10  -4   1   -1.12    3.06
 -10  -4   1   -1.56    5.03
 -10  -4   1    2.73    4.77
  10  -4  -1   -0.55    4.63
   2  -1 -10  873.11   64.14
  -2   1  10  772.55   63.11
   2   1 -10  795.14   64.27
   2  -1 -10  786.30   63.74
   2   1 -10  746.67   63.67
   2  -1 -10  840.61   64.51
   2   1 -10  853.40   63.82
  11  -3  -6  403.35   32.01
 -11   3   6  356.56   33.51
 -11  -3   6  415.37   31.18
 -11   3   6  355.49   31.25
   3   4  -8  138.17   12.17
  -3   4   8  134.29   13.87
   3  -4  -8  150.94   14.34
  -3  -4   8  145.39   13.49
   3  -4  -8  143.50   11.83
   3   4  -8  144.47   12.36
  -3  -4   8  138.75   11.98
   3  -4  -8  140.54   14.69
  10  -1  -9    9.30    6.02
 -10   1   9    0.56    9.15
 -10  -1   9    1.41    3.98
 -10  -1   9    1.67    6.55
 -10  -1   9   -3.43    5.62
  -8  -3  -4   39.04    7.50
  -8  -3  -4   32.61    9.27
  -8  -3  -4   35.17    8.23
  -8   3  -4   46.22    8.66
   8  -3   4   49.31    6.68
   4   6  -2   24.62    6.76
  -4  -6   2   15.67    3.89
  -4   6   2   17.95    4.12
  -4   6   2   27.17    9.57
   4  -6  -2   19.75    6.22
   4   6  -2   17.58    3.69
   6   3  -9  148.00   10.77
  -6  -3   9  131.49   11.68
   6  -3  -9  106.70   13.35
  -6   3   9  106.26   10.43
   6  -3  -9  126.88   12.96
   7  -5  -5  107.14   12.28
  -7   5   5  114.10   15.28
  -7   5   5  130.94   10.26
  -7   5   5  112.12   10.38
   7   5  -5  119.64   10.34
  -4  -1  -8  141.77   13.51
  -4  -1  -8  129.05   15.15
  -4  -1  -8  147.37   15.29
  -4   1  -8  149.44   13.28
  -4   1  -8  129.90   15.19
  -3   6   3    1.68   10.42
   3   6  -3    8.51    3.69
  -3   6   3    4.73    3.22
   3  -6  -3   12.37    6.99
  -3  -6   3    5.21    3.44
   3   6  -3    5.18    6.48
   9   3  -8  280.21   22.19
   9  -3  -8  274.85   23.79
  -9   3   8  253.76   25.60
  -8  -5   1  159.84   12.70
  -8   5   1  141.53   16.37
  -8   5   1  128.63   13.37
  -8  -5   1  158.19   13.09
  -8  -5   1  172.01   13.35
   8   4  -7   48.45    5.20
   8  -4  -7   56.72    8.92
  -8   4   7   43.20    5.66
  -8   4   7   60.04    4.85
   8   0 -10  116.81   11.54
   8   0 -10  123.74   11.93
  13   1  -2   80.70    7.73
  13  -1  -2   87.25    8.25
 -13   1   2   82.83   10.64
 -13   1   2   69.08   10.75
 -13  -1   2   88.73    8.47
 -13  -1   2   78.54    9.71
  -6   0  -7    3.39    5.53
  -6   0  -7    3.00    8.84
   6   0   7   -4.66    5.33
  -9  -2   9   83.90    7.63
  -9  -2   9   97.64    8.75
  -9   2   9   75.16   13.63
   9  -2  -9   82.87   10.31
  -4  -6   0   14.67    5.66
   4   6   0   35.71    4.19
  -4   6   0    8.66    8.87
  -4   6   0   -1.91    3.84
   4   6   0   50.05    9.31
   4  -6   0   -0.14    5.03
  -9  -3  -3  895.64   70.11
   9  -3   3  870.82   69.43
  -9   3  -3  810.21   69.93
  -9  -3  -3  899.61   70.25
  -9   3  -3  817.15   70.28
  -9  -3  -3  961.87   69.68
  -5   4   8   92.23   11.07
  -5   4   8  115.33    9.06
   5  -4  -8  117.36   11.82
   5  -4  -8  111.62   12.48
  -5  -4   8  101.70   10.44
   5   4  -8  101.66    9.71
 -11  -3   0  157.60   12.26
 -11   3   0  113.89   14.25
 -11  -3   0  139.04   13.61
  11  -3   0  132.83   12.74
 -11  -3   0  147.62   13.80
 -11  -3   0  155.12   12.55
  -2   3   9   24.30    7.87
   2   3  -9   46.84    6.02
  -2  -3   9   39.66    5.25
   2  -3  -9   18.26    7.89
   2   3  -9   36.43    5.64
   2  -3  -9   24.93    5.32
   2  -3  -9   15.52    8.41
   9   2   4  355.16   27.13
  -9   2  -4  321.83   27.79
  -9  -2  -4  286.38   28.19
   9  -2   4  326.57   27.12
  -9  -2  -4  349.00   27.44
   0   5  -6    9.76    4.45
   0  -5  -6    5.75    7.22
   0   5  -6    7.49    5.34
   0  -5  -6    1.46    7.53
   0  -5  -6    7.05    4.00
   0  -5   6    6.21    3.72
 -13   0   6 2013.08  138.17
  13   0  -6 1719.53  137.69
 -13   0   6 1661.93  138.40
 -13   0   6 1690.31  137.72
 -13   0   6 1870.44  137.97
 -12   0  -1    9.89    9.03
  12   0   1   -4.96    4.30
 -12   0  -1   -1.76    5.58
   1   0 -10  235.66   22.14
   1   0 -10  259.56   21.28
   1   0 -10  236.86   21.64
  -2  -4   8   24.77    4.35
  -2   4   8   24.63    8.55
   2   4  -8   30.04    4.88
   2   4  -8   22.00    4.78
  -2  -4   8   27.40    7.47
   2  -4  -8    8.25    7.50
   2  -4  -8   29.14    8.27
   2  -4  -8   26.80    4.31
 -10   4   5    1.65    3.36
 -10  -4   5    3.76    3.40
  10  -4  -5   -0.34    5.89
  -7   3  -5   -5.03    6.59
  -7  -3  -5   13.69    6.97
  -7  -3  -5   -0.26    7.74
  -7  -3  -5   -1.51    6.02
  -7   3  -5    2.93    6.57
  -4  -3  -7    8.34    6.76
  -4  -3  -7    0.59    6.60
  -4   3  -7    5.42    5.59
  -4  -3  -7    7.73    8.05
  -4   3  -7    1.78    5.58
   4  -3   7    4.68    4.71
  -8  -2  -5   70.78   11.08
  -8   2  -5   69.32    8.74
  -8   2  -5   53.08   10.91
  -8  -2  -5   73.97    8.68
  -8  -2  -5   55.17   10.06
   8  -2   5   76.34    7.80
   8   5  -4   80.15    7.36
  -8   5   4   70.51   12.46
  -8   5   4   82.42    7.55
   8  -5  -4   79.23    9.36
 -10   2  -3  149.91   16.44
 -10  -2  -3  166.02   14.36
 -10  -2  -3  138.29   15.66
  10  -2   3  156.38   14.00
  10   2   3  166.03   13.87
   2  -1   9   61.79    6.91
  -2   1  -9   49.77    7.60
  -2  -1  -9   52.07    9.97
  -2  -1  -9   37.58    9.73
  -2  -1  -9   50.38    8.21
  -2   1  -9   48.00   10.08
   1   6   3  188.95   14.28
  -1  -6  -3  160.93   15.86
   1  -6   3  158.12   14.43
  -1   6  -3  162.97   14.52
  -1   6  -3  153.44   16.45
   1   6   3  183.38   18.92
  -1  -2  -9   80.91   10.55
  -1  -2  -9   92.27    9.79
  -1   2  -9   70.90    9.05
   1  -2   9   67.53    7.90
  -1   2  -9   77.36    8.46
  -1  -2  -9   52.38    9.24
  13   0  -1    6.09    4.01
 -13   0   1    5.03    8.31
 -13   0   1   -6.15    5.55
  -6  -5   6    0.22    0.95
  -6   5   6   -3.22    2.97
  -6   5   6   -6.74    4.69
   6  -5  -6  -10.82    8.51
  -6   5   6  -16.64   12.17
   6   5  -6   -3.71    3.22
   8  -1 -10  768.52   61.65
  -8  -1  10  789.17   60.87
   8  -1 -10  746.86   61.39
   8   1 -10  787.22   61.04
   8   1 -10  763.91   61.17
   2  -3   8   -7.79    4.89
  -2  -3  -8    0.22    6.65
  -2   3  -8    0.18    5.27
  -2   3  -8   -0.63    5.54
  -2  -3  -8   -3.61    6.55
   4   6  -3  160.22   12.89
  -4   6   3  151.24   16.77
  -4   6   3  151.98   12.93
  -4  -6   3  145.03   12.55
   4  -6  -3  154.00   14.49
  -6  -1  -7  146.35   16.29
   6  -1   7  146.32   13.77
  -6   1  -7  166.44   14.12
  -6   1  -7  150.97   16.46
  -6   4   8   10.27    5.90
  -6  -4   8   26.00    4.60
   6  -4  -8   12.11    8.42
   6   4  -8   24.06    3.73
  -6   4   8   17.59    2.51
   5  -2 -10    8.21    7.59
  -5  -2  10   28.31    3.06
   5  -2 -10    5.48    7.36
   5   2 -10   11.36    5.83
   5   2 -10    1.59    4.40
   5   2 -10   14.99    6.61
  -5   2  10    8.59    2.71
 -12   2   0   -4.10    7.93
 -12  -2   0    0.36    4.17
 -12  -2   0   -1.70    6.99
 -12   2   0   -0.66    8.57
  12  -2   0   -4.26    4.85
  12   2   0   -6.56    3.93
  -7  -3   9   15.55    4.79
   7  -3  -9   12.67    8.09
  -7   3   9    5.80    0.94
   7   3  -9   16.85    2.90
  -7   3   9    8.22    1.30
   7  -3  -9   11.40    6.38
  -4  -4  -6   13.49    6.44
  -4   4  -6    8.25    6.47
  -4  -4  -6   18.80    7.14
  -4   4  -6   -0.18    5.59
  -4  -4  -6   26.08    8.34
   4  -4   6    5.48    4.59
   4  -2 -10  722.60   52.34
   4  -2 -10  643.58   52.40
   4   2 -10  609.50   51.16
   4   2 -10  647.36   51.92
  -4   2  10  644.96   50.93
   4   2 -10  661.84   51.52
  -2  -4  -7   99.67   10.79
  -2  -4  -7   92.35    9.70
  -2  -4  -7   92.58   11.48
  -2   4  -7   92.75    9.30
   2  -4   7   83.72    8.68
  -2   4  -7   89.53    9.67
 -10  -3  -2   89.27   11.22
 -10   3  -2   94.39   12.38
 -10   3  -2   96.47   11.65
 -10  -3  -2  108.07    9.95
 -10  -3  -2   86.74   11.27
  10  -3   2   99.66    9.76
 -13   1   6  591.36   54.74
 -13  -1   6  703.58   54.76
 -13  -1   6  766.36   54.93
 -13   1   6  664.48   55.94
 -13  -1   6  804.70   55.09
  13  -1  -6  710.58   54.94
 -13  -1   6  678.47   55.19
 -12  -1  -1   27.78    5.66
 -12  -1  -1   26.49    8.56
 -12   1  -1   25.37    9.74
  12   1   1   27.70    5.09
 -12   1  -1   39.84    7.16
  12  -1   1   33.72    5.41
  12  -3  -3   11.55    4.77
 -12   3   3    9.08    7.22
 -12  -3   3    0.45    2.97
 -12  -3   3    5.44    5.14
 -12   3   3   -1.50    8.97
   1  -1 -10    2.11    6.61
   1   1 -10    8.02    6.09
   1   1 -10    0.34    7.45
   1  -1 -10    8.69    7.30
   1   1 -10    8.64    8.12
   1  -1 -10    1.83    7.72
   3   6   2  112.81   15.32
  -3  -6  -2  138.37   12.22
   3  -6   2   97.53   10.76
  -3  -6  -2  137.41   10.74
  -3   6  -2   78.17   13.20
   4   6   1   31.09   10.42
  -4   6  -1   24.92    9.32
  -4  -6  -1   25.68    6.76
  -4   6  -1   32.61    5.37
   4  -6   1   32.01    5.78
  -4  -6  -1   46.55    5.48
  -8   5   0  251.48   23.65
  -8   5   0  248.05   25.70
  -8  -5   0  293.10   23.08
  -8  -5   0  295.35   23.66
  -8  -5   0  303.68   23.61
  -8  -5   0  305.32   23.50
  -3   5  -5   25.33    7.76
  -3  -5  -5   21.33    7.18
   3  -5   5   25.78    5.00
  -3   5  -5   18.21    5.08
  -3  -5  -5   21.65    5.19
  -3  -5  -5   27.48    7.54
 -11  -2   8    4.58    2.05
  11  -2  -8   -1.33    5.78
 -11   2   8    6.97    8.97
  12  -3  -4   57.65    7.25
 -12   3   4   71.14   10.73
 -12   3   4   52.91    8.48
 -12  -3   4   56.63    5.60
 -12  -3   4   59.78    5.33
 -12  -3   4   71.76    6.93
 -12  -3   4   60.44    5.50
 -12   0   8  187.47   14.97
 -12   0   8  185.85   15.19
  12   0  -8  161.50   14.37
 -12   0   8  159.69   15.65
   6  -2 -10   22.47    8.28
   6   2 -10   73.99    7.11
   6   2 -10   41.01    5.07
   6  -2 -10   23.98    7.78
  -6  -2  10   60.75    3.87
  -6  -2  10   71.82    6.70
   6   2 -10   38.41    7.16
   1  -3  -9  310.97   27.07
  -1  -3   9  296.45   25.47
   1  -3  -9  339.24   25.73
   1   3  -9  307.48   25.65
   1   3  -9  301.85   25.70
   1  -3  -9  340.68   26.76
   1  -4  -8   -5.13    8.25
  -1  -4   8    3.75    3.90
   1  -4  -8    0.32    4.22
   1  -4  -8   -1.17    7.69
   1   4  -8    7.23    4.58
   1   4  -8   10.03    4.52
  -5  -6   1  137.67   11.96
  -5   6   1  119.92   11.69
  -5   6   1  132.01   15.42
   5  -6  -1  137.16   12.67
   5   6  -1  144.60   11.60
   3   2 -10  163.96   16.44
   3   2 -10  176.95   14.88
   3   2 -10  176.09   15.55
   3  -2 -10  177.89   16.49
  -3   2  10  146.54   14.12
   3  -2 -10  184.96   16.14
   5   6  -2   76.61    7.20
  -5  -6   2   72.46    7.21
  -5   6   2   76.33    7.37
   5  -6  -2   73.82    8.69
  -5   6   2   69.38   12.35
 -10  -4   0   -3.33    3.63
 -10   4   0   -9.27    8.64
 -10  -4   0   -1.01    5.34
 -10  -4   0    2.45    4.52
 -10   4   0    1.39    5.20
  10  -4   0   -0.29    4.84
 -13  -1   1    8.10    7.34
 -13   1   1   12.24    7.39
  13   1  -1   11.53    3.95
 -13   1   1   10.65    8.64
 -13  -1   1   14.49    4.87
  13  -1  -1    8.86    4.48
  -7   2  -6    2.60    8.80
  -7  -2  -6    6.97    6.25
  -7  -2  -6   15.21    8.54
  -7   2  -6   14.97    6.02
  -7  -2  -6    4.72    8.33
  -2  -6   4   34.27    4.64
  -2   6   4   12.29    3.79
   2   6  -4   52.32    5.38
  -2   6   4    1.48   11.44
   2  -6  -4   12.23    7.69
   2   6  -4   35.50    7.66
  -1  -5  -6   16.26    7.55
   1  -5   6   20.87    4.45
  -1   5  -6   20.23    6.28
  -1  -5  -6   24.88    7.47
  -1  -5  -6   16.70    4.83
  -1   5  -6   17.37    4.88
 -12   2   7   54.35    7.51
 -12  -2   7   96.36    7.87
 -12  -2   7  124.84    8.06
 -12  -2   7  103.99    7.73
 -12  -2   7  108.94    7.99
 -12   2   7  111.66   12.43
  12  -2  -7  113.66    9.62
  -8  -4  -3   -4.05    6.41
  -8  -4  -3    3.33    6.64
  -8   4  -3    7.33    8.79
  -8   4  -3   -2.08    5.22
  -8  -4  -3   -4.90    6.04
 -13  -2   4  358.02   28.06
 -13  -2   4  377.13   28.61
 -13  -2   4  356.60   27.93
 -13   2   4  304.01   28.98
 -13   2   4  334.28   30.16
  13  -2  -4  343.76   28.33
   9   0 -10   20.28    6.32
   9   0 -10   17.12    5.38
   7  -4   4  267.23   23.06
  -7  -4  -4  302.72   23.60
  -7   4  -4  265.74   24.47
  -7  -4  -4  284.54   24.05
  -7  -4  -4  277.23   23.72
 -10   0  -4  175.09   19.11
  10   0   4  191.88   16.45
 -10   0  -4  199.95   16.84
   1   6  -4   24.68    7.57
   1  -6  -4   -1.76    7.78
  -1   6   4   -6.79   12.02
  -1  -6   4   45.45    4.64
  -1   6   4   10.11    3.62
   1   6  -4   37.46    4.90
  11   2   2  608.05   46.74
 -11  -2  -2  600.99   46.90
  11  -2   2  593.45   46.85
 -11   2  -2  503.92   47.98
 -12  -3   2   56.39    5.32
  12  -3  -2   53.18    6.60
 -12   3   2   52.99   10.25
 -12  -3   2   55.18    7.07
 -12   3   2   36.70    9.01
 -12  -3   2   44.78    7.46
 -12  -3   2   51.67    5.71
 -13  -2   3  207.74   17.12
 -13   2   3  173.12   19.44
 -13  -2   3  223.92   18.21
  13  -2  -3  207.72   17.54
 -13   2   3  172.99   18.83
 -13  -2   3  228.72   17.20
  -6   3  -6   13.48    6.80
  -6   3  -6   12.48    6.16
  -6  -3  -6   23.99    7.45
  -6  -3  -6   23.21    8.65
  -6  -3  -6   27.48    6.78
   6  -3   6   18.38    5.22
 -11   0   9   11.00    7.53
 -11   0   9    3.73    5.19
 -11   0   9   -5.09    6.23
  11   0  -9   -1.51    4.90
   9   0   5    6.89    5.20
  -9   0  -5   10.65    5.47
  -9   0  -5    1.64   10.34
  -3  -6   4  426.80   34.86
   3   6  -4  503.77   35.40
  -3   6   4  428.72   37.76
   3  -6  -4  406.62   36.22
  -3   6   4  426.66   34.90
   2  -6   3  129.64   13.44
  -2  -6  -3  175.41   13.54
  -2   6  -3  129.32   15.58
  -2   6  -3  167.95   13.73
  -2  -6  -3  170.89   15.17
   6  -5   3   84.48    8.87
  -6   5  -3   68.07   11.95
  -6  -5  -3   87.69    9.09
  -6  -5  -3   74.92    9.38
  -6  -5  -3   90.30    9.99
  -5  -6   0   -3.83    3.96
   5  -6   0   -0.85    5.02
  -5  -6   0   -4.28    5.18
  -5   6   0   -0.26    3.81
   5   6   0    6.17    8.24
  -5   6   0    6.80    8.75
 -12  -3   5  221.05   17.20
 -12   3   5  199.32   20.04
  12  -3  -5  206.39   17.72
 -12   3   5  184.33   17.92
   0   0 -10    9.67    8.28
   0   0 -10   21.39    6.69
   0   0 -10   10.97    8.41
   7  -2 -10  322.81   28.74
   7  -2 -10  341.23   28.44
  -7  -2  10  347.08   27.32
 -12  -1   8    6.74    4.92
 -12  -1   8    0.86    4.28
 -12  -1   8    5.46    5.43
  12  -1  -8    3.12    5.04
 -12   1   8    8.76    7.91
   7  -4  -8   25.90    8.10
   7   4  -8   28.13    3.71
  -7  -4   8   13.85    2.61
  -7   4   8   20.03    5.17
  -8   5   5  150.64   13.58
   8   5  -5  170.60   13.76
  -8   5   5  174.79   13.75
   8  -5  -5  164.56   15.56
  -8   5   5  159.73   18.17
  -7  -5  -2  301.40   23.92
   7  -5   2  281.65   23.44
  -7  -5  -2  292.52   23.59
  -7   5  -2  257.26   25.50
  -7   5  -2  264.99   23.61
  -7  -5  -2  295.75   23.65
   5   6  -3    3.51    3.19
  -5   6   3    5.84    3.73
   5  -6  -3    5.60    6.59
  -5  -6   3    2.70    2.72
 -11   3   7   57.01    5.50
 -11   3   7   93.07   11.89
  11   3  -7   91.20    5.42
  11  -3  -7   96.17    8.46
  -9   4   7    0.17    3.06
   9  -4  -7    5.25    7.40
  -9   4   7    0.74   10.72
   9   4  -7    1.43    2.44
 -13  -2   5  325.22   23.13
  13  -2  -5  284.04   23.46
 -13   2   5  233.57   23.84
 -13   2   5  281.38   25.36
 -13  -2   5  286.10   23.35
   0   6   4   10.56   12.32
   0   6  -4   21.49    4.57
   0   6   4   26.19    3.94
   0  -6  -4   20.35    7.68
   0   6  -4   20.29    7.40
   0  -6   4   18.46    4.33
 -13   0   7    1.27    5.54
 -13   0   7    9.25    2.02
  13   0  -7    0.66    3.48
 -13   0   7   -7.51    5.39
 -13   0   7    3.66    6.23
   2  -2 -10  139.82   13.72
   2   2 -10  109.12   13.58
   2   2 -10  134.91   12.00
   2   2 -10  122.13   12.15
   2  -2 -10  143.63   14.53
  -2   2  10  129.36   11.45
   2  -2 -10  119.62   12.10
 -10   4   6  359.73   29.53
 -10   4   6  328.68   29.21
  10   4  -6  430.24   29.54
  10  -4  -6  397.55   30.73
 -10   4   6  385.30   32.52
  -9   4  -2  193.32   20.31
  -9  -4  -2  219.58   18.91
   9  -4   2  212.36   18.25
  -9   4  -2  191.55   18.56
  -9  -4  -2  237.80   19.05
  -9  -4  -2  230.56   18.49
  -8  -3   9   -1.83    3.58
   8  -3  -9   -5.31    7.31
   8   3  -9   -6.21    2.74
  -8   3   9   -5.89   11.68
  11   0   3   -0.42    4.63
 -11   0  -3   -4.42    5.58
  10  -2  -9   52.96    8.13
 -10  -2   9   45.18    4.84
 -10   2   9   56.43   11.59
  -4  -2  -8   71.85    9.09
  -4  -2  -8   37.19    9.57
  -4   2  -8   66.14    8.06
  -4   2  -8   66.48    9.91
   4  -2   8   71.67    7.74
  -4  -2  -8   72.49   10.84
  -7   5   6   31.52    3.66
   7   5  -6   25.64    3.95
  -7   5   6   22.07   11.27
   7  -5  -6   23.36    8.05
  -7   5   6   23.05    4.60
  -5  -5  -4  155.71   15.25
  -5  -5  -4  170.43   14.97
  -5  -5  -4  158.55   14.21
  -5   5  -4  159.88   14.22
   5  -5   4  161.33   14.18
  -5   5  -4  140.52   16.22
  10   3  -8  289.96   22.89
  10  -3  -8  275.44   24.54
 -10   3   8  282.84   26.54
  -6  -4  -5   27.67    8.35
   6  -4   5   20.59    5.37
  -6  -4  -5   35.63    7.30
  -6   4  -5    8.19    7.34
  -6   4  -5   27.85    6.05
  -6  -4  -5   26.53    7.35
   9  -1 -10    0.77    5.55
  -9  -1  10    2.07    4.27
   9   1 -10    2.29    5.30
   9  -1 -10   -3.48    6.66
 -10  -1  -4   68.95   11.78
  10   1   4   71.06    7.86
  10  -1   4   67.47    7.77
 -10  -1  -4   70.02    8.24
  13   2  -2  114.26    9.32
 -13   2   2   79.22   12.30
  13  -2  -2   88.10    9.86
 -13  -2   2  115.04    9.44
 -13  -2   2  107.55    9.37
 -13   2   2   94.39   12.77
 -13  -2   2   97.95   11.16
   4  -6  -4  100.28   13.09
  -4  -6   4  115.22   10.53
  -4   6   4   93.57   15.76
  -4   6   4  128.14   10.79
   4   6  -4  147.05   11.08
 -11   1   9   -6.39    8.66
 -11  -1   9    1.36    5.52
  11  -1  -9   -4.63    5.94
 -11  -1   9   -1.62    4.19
 -11  -1   9   -1.51    6.14
  -3   5   7   56.54    5.51
  -3  -5   7   66.42    6.08
  -3  -5   7   61.22    8.72
   3   5  -7   52.04    6.52
  -5   0  -8  185.45   16.16
   5   0   8  183.27   15.72
  -5   0  -8  155.35   17.82
 -11  -4   3  293.87   22.41
 -11  -4   3  280.02   22.36
 -11  -4   3  346.90   23.44
 -11  -4   3  264.88   22.24
  11  -4  -3  314.49   23.56
 -11   4   3  271.96   23.34
  -3   0  -9    4.07    6.52
  -3   0  -9   -1.56    8.79
  -3   0  -9   -3.51    9.03
  -9   1  -5   -4.55   10.44
   9   1   5   15.15    5.22
   9  -1   5   15.04    5.66
  -9  -1  -5   11.73    5.81
  -9  -1  -5    4.49    9.32
   8   0   6    8.96    5.38
  -8   0  -6   11.23    9.83
   0  -4   8   35.25    5.36
   0   4  -8   32.06    5.78
   0   4  -8   37.90    5.98
   0  -4  -8   39.37    5.82
 -11  -3  -1   66.97    7.39
 -11  -3  -1   74.13    9.30
 -11   3  -1   48.28   10.05
  11  -3   1   62.59    7.66
  -9  -5   3   -0.23    3.66
  -9  -5   3    2.52    1.06
   9  -5  -3    2.15    5.21
  -9   5   3    5.11    3.99
  -9   5   3    0.35    9.92
   9  -5  -2   88.63    9.88
  -9   5   2   83.54   13.05
  -9  -5   2   99.06    9.09
  -9   5   2   93.70    9.25
  -9  -5   2   97.65    8.01
  -4   5   7  561.59   46.60
   4  -5  -7  555.78   48.38
   4   5  -7  591.26   47.06
  -4  -5   7  612.97   47.34
  -4  -5   7  639.28   46.68
   0   3  -9   92.40    9.30
   0  -3  -9  103.10   11.12
   0  -3  -9  103.46   11.97
   0  -3   9   81.99    8.86
   0   3  -9   82.58    9.21
   0  -3  -9   92.74    9.66
   2   5  -7   12.16    4.61
  -2  -5   7    6.63    7.28
  -2  -5   7   14.98    3.75
   2   5  -7   11.05    4.10
   2  -5  -7    0.08    3.58
  11  -4  -4    3.73    5.40
 -11   4   4    1.98    4.29
 -11  -4   4    8.80    3.91
 -11   4   4    8.79    9.62
   0   1 -10  299.68   25.42
   0   1 -10  312.83   26.60
   0  -1 -10  308.50   26.66
   0  -1 -10  334.32   25.96
   0   1 -10  291.63   26.03
   0  -1 -10  277.62   26.00
 -13   0   0   48.05    7.60
 -13   0   0   53.11   10.63
  13   0   0   63.18    6.72
 -11   4   2  372.15   25.14
  11  -4  -2  442.50   25.11
 -11  -4   2  427.48   25.02
 -11  -4   2  418.35   23.87
 -12  -3   1    3.17    4.05
 -12   3   1   -3.93    8.07
  12  -3  -1    2.66    4.77
 -12   3   1   -1.24    8.85
 -12  -3   1   -1.52    6.42
 -12  -3   1   -2.25    3.67
  -4   6  -2  141.49   16.71
  -4  -6  -2  169.05   13.89
  -4  -6  -2  173.24   14.61
  -4   6  -2  157.54   14.01
  -4  -6  -2  176.90   15.21
   4  -6   2  147.42   14.16
  -2   2  -9    3.63    7.00
  -2  -2  -9    2.08    8.96
  -2   2  -9    0.18    5.72
   2  -2   9   -6.15    5.49
  -2  -2  -9   -0.47    7.21
  -2  -2  -9    5.69    7.61
 -13  -1   7    5.94    4.51
 -13   1   7    6.66    7.61
 -13  -1   7    4.00    5.09
 -13  -1   7    4.68    2.60
  13  -1  -7    3.25    4.29
 -13  -1   7    4.01    4.81
  -8  -5  -1   27.60    6.27
  -8   5  -1   31.85   10.16
  -8   5  -1   20.39    5.51
  -8  -5  -1   34.23    5.87
  -8  -5  -1   24.43    5.68
 -11  -1  -3    7.30    5.28
 -11   1  -3   19.19    6.43
 -11   1  -3   20.08   10.09
  11   1   3   20.71    5.18
  11  -1   3   18.04    5.07
  -5  -5   7   51.59    7.65
   5   5  -7   59.34    7.19
  -5   5   7   86.08   15.93
  -5   5   7   67.36    6.27
   5  -5  -7   59.16   10.90
  -1  -6  -4  171.59   13.74
  -1  -6  -4  170.09   15.84
   1  -6   4  142.57   13.68
  -1   6  -4  146.74   15.69
  -1   6  -4  167.11   13.99
  -1  -6  -4  160.31   14.84
  14   0  -4  162.93   13.76
 -14   0   4  149.06   14.65
 -14   0   4  171.96   15.24
  -5  -6  -1  199.52   15.89
  -5  -6  -1  188.55   15.10
  -5   6  -1  130.68   17.60
  -5   6  -1  174.59   15.18
   5  -6   1  163.19   15.31
   8  -2 -10    7.65    6.26
  -8  -2  10    5.27    4.10
   8  -2 -10   10.09    7.57
  -6   2  -7   28.00    9.42
  -6   2  -7   18.72    5.85
  -6  -2  -7    8.42    8.38
  -6   6   2  138.59   11.97
   6  -6  -2  134.53   13.11
  -6  -6   2  135.39   11.70
   6   6  -2  140.62   11.82
  -6   6   2  113.92   15.69
  -9   5   4    6.89   10.12
  -9   5   4    6.42    3.54
   9  -5  -4   -1.26    6.19
   3  -4   7  200.37   17.76
  -3   4  -7  197.32   18.16
  -3  -4  -7  252.85   19.39
  -3  -4  -7  242.43   19.92
  -3  -4  -7  214.63   18.61
  -3   4  -7  203.49   18.40
  -9  -5   1   71.31    6.73
  -9   5   1   60.31    8.06
  -9   5   1   58.63   11.81
  -9  -5   1   83.20    7.43
  -9  -5   1   76.72    7.72
   9  -5  -1   74.77    8.17
  -5   1  -8   18.90    9.80
  -5  -1  -8   27.98    7.07
  -5  -1  -8   26.03    9.75
  -5  -1  -8   23.60    9.64
  -5   1  -8   21.67    6.35
  -2  -5  -6   90.36   11.02
  -2  -5  -6   77.57   10.57
  -2  -5  -6   80.71    8.72
  -2   5  -6   74.38    9.92
   2  -5   6   85.94    8.44
  -2   5  -6   89.96    8.92
  -3   1  -9    2.29    5.66
   3  -1   9    1.72    5.28
  -3  -1  -9    0.30    8.71
  -3   1  -9    1.36    9.41
  -3  -1  -9  -10.16    8.80
  -3  -1  -9   -2.63    6.40
  -8  -1  -6  318.08   25.85
  -8   1  -6  318.58   25.86
   8   1   6  327.96   25.57
  -8  -1  -6  302.39   27.42
   8  -1   6  307.34   25.54
  -8   1  -6  243.36   27.46
   3  -3   8   10.35    5.04
  -3  -3  -8   10.86    6.90
  -3   3  -8   12.30    5.50
  -3   3  -8    9.28    5.90
  -6  -6   1   57.28    6.47
  -6   6   1   48.60    5.99
   6  -6  -1   50.98    7.18
  -6   6   1   40.76   10.87
  -3  -6  -3   20.08    4.66
  -3  -6  -3   22.90    7.52
  -3  -6  -3   33.88    7.11
   3  -6   3   -2.96    4.75
  -3   6  -3   -5.49    8.86
  12  -3  -6   34.48    6.55
 -12   3   6   28.15    6.36
 -12   3   6   35.59   10.68
 -12  -3   6   37.70    4.53
 -13   2   6  165.69   17.33
 -13  -2   6  190.54   14.71
 -13   2   6  157.35   15.12
  13  -2  -6  172.37   15.23
 -14   0   3    1.39    6.42
  14   0  -3   -2.25    3.80
 -14   0   3   -5.34    6.83
 -12  -2  -1    6.76    4.71
  12   2   1    6.57    4.28
  12  -2   1   11.76    5.05
 -12   2  -1    8.12    7.72
 -12  -2  -1   -0.24    7.57
 -12   2  -1    9.23    9.56
   1   2 -10  338.87   30.54
   1  -2 -10  322.02   29.70
   1  -2 -10  381.62   30.97
   1  -2 -10  422.53   30.53
   1   2 -10  360.70   29.57
   1   2 -10  356.24   29.61
   1   5  -7   54.14    6.99
  -1  -5   7   54.41    6.21
   1   5  -7   54.37    6.80
   1  -5  -7   64.68    6.32
  -5   6   4  178.27   14.43
  -5   6   4  157.47   18.56
   5   6  -4  172.88   14.48
   5  -6  -4  156.61   16.10
  -4  -5  -5   12.23    6.88
   4  -5   5    0.66    4.52
  -4  -5  -5   10.85    7.47
  -4   5  -5    9.41    5.00
  -4   5  -5    6.60    7.72
  -4  -5  -5    2.84    5.36
   8   4  -8  244.50   19.30
  -8   4   8  227.28   23.59
   8  -4  -8  215.38   21.19
 -12   0  -2   30.53    6.37
  12   0   2   34.19    5.63
 -12   0  -2   28.78   10.49
 -14   0   5    2.20    6.54
 -14   0   5  -12.79    5.68
  14   0  -5   -0.81    3.82
  13  -1   0   35.97    5.59
 -13  -1   0   46.40    6.02
 -13   1   0   32.44    9.81
 -13  -1   0   18.11    8.49
  13   1   0   33.16    5.21
 -13   1   0   36.39    8.10
  10  -4   1   52.39    7.08
 -10   4  -1   42.23    7.50
 -10  -4  -1   54.53    7.85
 -10   4  -1   34.90   10.62
 -10  -4  -1   63.45    7.13
 -10   0  10    3.63    8.93
  10   0 -10   12.62    5.66
  -5  -3  -7   -3.14    7.25
   5  -3   7    1.34    5.03
  -5  -3  -7    3.79    8.76
  -5  -3  -7   11.60    7.25
  -5   3  -7   -0.19    5.76
  -5   3  -7    5.99    6.34
 -11  -4   5   33.36    4.53
 -11   4   5   40.86   11.05
  11  -4  -5   31.84    6.67
 -11   4   5   24.45    4.92
  -6   6   3   52.44    4.66
   6   6  -3   48.23    4.33
  -6   6   3   48.11   11.45
   6  -6  -3   54.29    7.29
  -5   0  11    0.52    2.41
   5   0 -11    1.98    7.11
   5   0 -11   -1.73    6.75
  -5  -4  -6  265.53   20.41
  -5  -4  -6  241.05   20.92
  -5   4  -6  223.89   19.58
  -5  -4  -6  240.87   20.04
   5  -4   6  205.48   19.00
  -5   4  -6  220.44   19.95
  13   2  -1    1.07    3.90
 -13   2   1   -2.03    8.03
 -13  -2   1   -2.93    6.98
 -13  -2   1    0.23    3.79
  13  -2  -1   -4.29    4.94
 -13   2   1    5.36    9.10
 -11  -4   1    6.27    4.33
 -11  -4   1    3.39    3.54
 -11   4   1   24.50    6.45
  11  -4  -1   29.68    5.91
 -11  -4   1    4.85    4.86
 -11  -4   1    0.34    5.59
 -14  -1   4 1220.36   98.92
  14  -1  -4 1292.15   98.61
 -14   1   4 1133.48   99.04
 -14   1   4 1233.00   99.57
 -14  -1   4 1399.00   98.70
 -14  -1   4 1222.34   98.74
   6   0 -11   -5.35    6.74
   6   0 -11    0.18    6.30
   9  -3  -9  326.05   24.51
   9   3  -9  352.61   22.53
  -9   3   9  361.08   27.29
   7   0   7   -2.66    5.66
  -7   0  -7   -6.45    6.26
  -7   0  -7   -9.58   10.26
  -6   5   7    1.58    2.83
  -6   5   7    0.86   12.58
  -6   5   7    0.97    5.30
   6   5  -7    5.86    3.81
   6  -5  -7   -1.25    7.97
   4   0 -11   -3.84    7.86
   4   0 -11   -6.54    7.09
  -4   0  11   -0.79    2.67
  -1   0 -10  365.26   32.06
  -1   0 -10  388.73   31.42
  -1   0 -10  382.19   32.51
  -9  -3  -4    5.19    6.40
   9  -3   4    0.75    4.58
  -9   3  -4    5.21    7.17
  -9  -3  -4    3.11    8.08
  -9  -3  -4   -0.47    7.30
   6  -6   0   42.10    6.50
  -6  -6   0   42.53    5.78
  -6  -6   0   47.32    6.57
  -6   6   0   38.28    5.80
  -6   6   0   37.01   10.34
   2   6  -5  313.42   25.75
  -2  -6   5  288.37   26.93
  -2  -6   5  292.03   25.31
   2  -6  -5  304.85   26.98
  -2   6   5  326.14   29.43
  -2   6   5  340.46   25.30
  -3   6   5    8.95   15.01
   3  -6  -5    0.72   11.41
  -3   6   5   32.46    8.41
  -1  -4  -8   -0.76    5.56
  -1   4  -8   -0.46    5.12
   1  -4   8    9.08    4.20
  -1   4  -8    6.19    5.36
 -14  -1   3  144.87   14.54
  14   1  -3  160.55   12.94
 -14   1   3  148.84   15.27
  14  -1  -3  152.17   13.28
 -14   1   3   98.39   15.21
 -14  -1   3  163.79   13.59
   8  -5  -6   32.77    8.10
  -8   5   6   17.86    4.03
   8   5  -6   20.30    3.57
  -8   5   6   11.93   11.02
  -8   5   6   20.99    3.43
 -12  -1  -2  145.44   17.00
  12  -1   2  164.21   14.81
 -12   1  -2  145.84   17.50
  12   1   2  176.67   14.78
 -12  -1  -2  188.20   15.17
 -12   1  -2  179.20   15.74
 -14   1   5   56.05    7.74
 -14  -1   5   54.93    7.49
  14  -1  -5   64.32    6.67
 -14  -1   5   70.90    7.52
 -14   1   5   53.96    9.59
 -14  -1   5   53.76    7.22
 -12  -2   8  145.38   12.55
 -12   2   8  174.21   16.30
  12  -2  -8  166.63   14.03
 -10  -1  10  171.12   13.26
  10  -1 -10  148.63   14.45
 -10   1  10  132.13   16.49
 -10  -1  10  138.09   15.05
 -14   0   2   47.39    9.01
 -14   0   2   53.88    7.58
  14   0  -2   49.87    5.98
  -8  -3  -5   41.58    9.29
  -8   3  -5   33.43    8.05
  -8   3  -5   45.12    8.67
  -8  -3  -5   47.33    7.56
  -8  -3  -5   49.63    8.71
  -1   6   5  147.53   10.59
  -1   6   5  113.22   16.77
  -1  -6   5  104.37   10.58
   1  -6  -5  118.78   13.32
   1   6  -5   98.42   12.27
   1   6  -5  106.64   11.02
  -2  -6  -4  267.96   22.36
   2  -6   4  236.22   21.27
  -2  -6  -4  273.24   21.31
  -2  -6  -4  283.33   22.74
  -2   6  -4  263.44   21.57
  -2   6  -4  227.00   22.95
 -10  -3  -3    5.86    5.74
 -10   3  -3    8.96    8.21
 -10  -3  -3    1.19    7.47
  10  -3   3    8.69    5.15
 -10   3  -3    4.41    8.00
 -10  -3  -3    3.99    7.65
   9  -5  -5  269.37   25.86
  -9   5   5  317.41   24.83
  -9   5   5  303.92   28.34
   9   5  -5  315.86   24.78
   7   0 -11   -1.90    6.26
   7   0 -11    1.58    6.10
   0   5  -7  200.48   18.74
   0  -5   7  200.42   18.19
   0  -5  -7  253.36   20.15
   0  -5  -7  229.37   20.24
   0  -5  -7  251.96   18.44
   0   5  -7  208.31   18.64
  -1  -3  -9    7.11    8.64
  -1   3  -9   -1.28    5.60
  -1  -3  -9   -5.28    6.54
  -1   3  -9    0.32    5.31
  -1  -3  -9   11.27    7.72
   1  -3   9    4.02    4.76
   5   1 -11    4.18    7.21
   5   1 -11    6.22    6.33
   5  -1 -11   12.20    6.97
   5  -1 -11    7.81    7.62
  -5  -1  11    8.86    2.55
  -9  -5   0   41.58    4.91
  -9  -5   0   41.15    5.84
  -9   5   0   27.26    6.14
  -9   5   0   45.29   11.07
  -9  -5   0   32.63    6.02
 -14   0   6  600.83   50.09
 -14   0   6  623.75   49.23
  14   0  -6  628.15   49.11
  12   0  -9    2.14    4.67
 -12   0   9    3.28    6.94
   3   0 -11   -1.63    6.66
   3   0 -11   -0.25    7.82
  -3   0  11   -1.01    2.99
   4   6  -5   -7.58    4.40
  -4   6   5   -1.16    3.02
  -4   6   5   -7.63   12.17
   4  -6  -5    4.66    7.95
  -4  -6   5    0.24    2.95
  10   4  -7   10.03    2.53
 -10   4   7    5.49   10.54
  10  -4  -7   10.16    7.05
   4  -4  -9  636.07   51.49
   4   4  -9  621.74   49.93
  -4  -4   9  586.04   50.40
  -4   4   9  640.50   50.33
   4  -4  -9  667.78   51.18
  -9   2  10  128.18   16.49
   9  -2 -10  139.43   13.77
 -10  -2  -4   11.42    8.07
  10   2   4   17.51    5.35
  10  -2   4   21.60    5.66
 -10  -2  -4   20.75    6.19
 -10   2  -4   23.35    6.74
   6   1 -11   67.24    9.16
   6  -1 -11   80.80    9.85
   6   1 -11   57.50    8.44
   6  -1 -11   66.66    9.97
 -13   0   8   72.87    9.70
 -13   0   8   85.47    8.84
 -13   0   8   79.76    9.01
   5  -3 -10   12.38    7.40
   5   3 -10    9.74    4.12
  -5  -3  10   29.80    7.10
   5  -3 -10   13.55    7.99
   7  -1   7   -3.42    5.30
  -7  -1  -7   12.41    9.69
   7   1   7   -0.48    5.73
  -7   1  -7   -3.06    6.12
  -7   1  -7    3.24   10.21
 -12  -3   0   38.75    7.91
 -12   3   0   30.47    9.86
 -12  -3   0   31.03    5.39
  12  -3   0   29.80    5.84
 -12   3   0   24.24    9.47
 -12  -3   0   25.56    7.35
  11  -2  -9    4.40    6.67
 -11   2   9    5.43    9.67
   4   1 -11   10.14    7.19
   4  -1 -11   -5.04    7.51
  -4  -1  11   -0.49    2.93
   4  -1 -11   -0.75    7.73
   4   1 -11   16.68    6.31
   4  -3 -10   -0.24    7.92
   4   3 -10    9.47    5.14
   4   3 -10    5.34    6.56
   4  -3 -10   -1.80    8.18
   4   3 -10    8.63    4.34
  -1   1 -10  169.16   18.22
  -1  -1 -10  198.34   18.58
  -1   1 -10  182.61   16.89
  -1   1 -10  184.10   18.53
  -1  -1 -10  193.76   17.98
  -1  -1 -10  198.20   17.34
  -9   2  -5  106.46   11.49
  -9  -2  -5  122.23   11.49
   9  -2   5  110.42   10.72
  -9   2  -5   95.96   14.09
  -9  -2  -5  111.46   13.07
   5  -4  -9   84.46   11.21
   5  -4  -9   57.65   10.34
  -3   4   9   -8.58    8.59
  -3  -4   9   10.51    4.44
   3  -4  -9   -7.50    8.33
   3   4  -9    1.67    4.37
   3  -4  -9   -6.01    7.81
   6   6  -4   94.58    8.84
  -6   6   4  102.84    8.88
  -6   6   4   88.37   14.42
   7  -5   3   25.18    5.57
  -7  -5  -3   29.32    7.13
  -7  -5  -3   20.52    6.47
  -7  -5  -3   21.38    5.97
  -7   5  -3   21.31    5.91
  -7   5  -3   10.73    9.20
  -5   6  -2   24.84    9.89
  -5  -6  -2   17.52    5.99
  -5  -6  -2   19.87    4.53
  -5  -6  -2   24.14    6.74
   5  -6   2   18.01    5.30
  -5   6  -2   17.16    4.88
 -11   3   8  190.65   19.11
  11  -3  -8  198.59   16.70
  11   3  -8  178.48   14.81
   0   2 -10  228.22   19.35
   0  -2 -10  246.67   20.34
   0  -2 -10  197.64   19.66
   0  -2  10  214.99   18.82
   0  -2 -10  234.13   20.92
   0   2 -10  240.22   19.84
   6  -3 -10   28.90    8.13
   6  -3 -10   23.61    8.85
   6   3 -10   37.19    4.76
  -6  -3  10   45.91    6.99
 -14  -1   2   21.92    5.10
  14  -1  -2   11.59    4.88
 -14   1   2   20.34    7.84
 -14  -1   2    7.42    7.06
 -14   1   2    9.93    8.51
  14   1  -2   19.65    4.11
   0  -6  -5   57.80   10.04
   0   6  -5   56.29   10.49
   0  -6   5   83.34    8.46
   0   6  -5  107.22    8.92
   0  -6  -5   54.31   11.21
   0  -6  -5   97.90    8.83
   3  -3 -10   48.46    9.50
   3  -3 -10   37.58    9.01
  -3   3  10   36.74    7.03
   3   3 -10   33.18    8.30
   3   3 -10   49.04    6.54
   3   3 -10   40.08    5.97
  -6  -5  -4  330.86   25.84
  -6  -5  -4  325.74   26.07
  -6  -5  -4  330.42   26.42
   6  -5   4  280.19   25.47
  -6   5  -4  294.27   27.14
  -4  -6  -3   -9.41    6.74
  -4  -6  -3  -10.90    4.84
   4  -6   3    8.40    4.82
  -4   6  -3    0.58    8.74
  -4  -6  -3   -4.43    7.10
  13  -2  -7   28.07    6.17
 -13   2   7   31.98    9.64
 -13  -2   7   40.80    4.35
   7   1 -11   -1.98    5.69
   7  -1 -11   10.43    7.37
   7   1 -11    1.56    6.07
   7  -1 -11   13.33    6.46
  11   4  -6   71.38    6.44
 -11   4   6   65.54    7.07
  11  -4  -6   71.02    9.27
 -11   4   6   67.23   12.27
   7   5  -7   94.15    9.30
  -7   5   7  112.89    8.83
  -7   5   7  107.49   15.70
   7  -5  -7  103.03   12.26
  -7   5   7   88.39    9.77
  11   2   3    6.33    4.94
 -11  -2  -3    1.18    5.57
  11  -2   3    9.67    5.06
 -11   2  -3    7.35    9.85
 -14   1   6   24.51    8.14
 -14   1   6   25.89    5.29
  14  -1  -6   30.88    4.95
 -14  -1   6   32.28    6.22
 -14  -1   6   34.18    4.91
  -8  -4  -4  127.92   12.52
  -8   4  -4  121.72   13.82
  -8  -4  -4  124.83   13.07
  -8  -4  -4  138.00   13.53
  -3   5  -6   86.53   10.55
  -3  -5  -6  105.50   11.19
  -3  -5  -6   94.28    9.44
  -3  -5  -6   98.27   11.57
  -3   5  -6   87.67    9.45
   3  -5   6   85.89    9.16
   6   4  -9  246.46   21.82
   6  -4  -9  265.59   23.99
   6  -4  -9  262.53   23.37
  -6   4   9  278.22   21.26
  -7  -3  -6   50.11    8.12
  -7   3  -6   60.00    8.49
  -7  -3  -6   42.85    8.78
  -7   3  -6   49.02    8.90
  -7  -3  -6   50.61   10.09
 -12  -1   9  116.88   11.07
 -12   1   9  122.61   13.43
  12  -1  -9  104.35   11.24
   3   1 -11   14.14    8.00
  -3   1  11   12.44    3.58
   3   1 -11   27.60    7.92
   3  -1 -11   13.62    8.74
   3   1 -11    5.34    6.57
   3  -1 -11    0.90    7.80
  -8  -5  -2   37.86    7.02
  -8   5  -2   29.96    6.17
   8  -5   2   30.37    6.10
  -8   5  -2   24.29   10.05
  -8  -5  -2   33.12    6.42
  -8  -5  -2   27.22    6.45
  -7   6   2   -1.09   10.69
  -7   6   2    0.26    3.90
   7  -6  -2   -1.92    6.11
   7   6  -2   -0.11    3.20
   9  -4  -8    5.06    7.69
   9   4  -8   12.99    3.04
  -9   4   8    8.94   11.60
  12  -3  -7    2.57    6.14
 -12   3   7   -8.03    9.79
  12   3  -7    4.28    2.54
 -13  -3   4   38.49    5.77
  13  -3  -4   34.04    5.92
 -13   3   4   43.32   10.11
 -13   3   4   27.95    8.35
 -13   0  -1   -0.37    5.69
 -13   0  -1   -6.85    9.55
  13   0   1    3.40    4.81
   8   0 -11    3.35    6.29
   8   0 -11   -2.80    5.94
  13  -1  -8  199.52   17.05
 -13  -1   8  198.32   17.19
 -13   1   8  209.67   18.88
  -6   6  -1   69.77    7.74
   6  -6   1   65.24    8.10
  -6  -6  -1   77.19    8.61
  -6  -6  -1   69.45    7.94
  -6   6  -1   56.57   11.87
  -6  -6  -1   72.08    7.37
  -9   4  -3    1.84    8.83
  -9  -4  -3   15.98    6.95
  -9   4  -3   -1.50    6.27
  -9  -4  -3   24.59    7.44
  -9  -4  -3   25.23    6.40
 -11   3  -2   14.50    8.91
 -11  -3  -2    2.38    7.42
 -11  -3  -2    0.95    5.33
  11  -3   2    6.90    5.03
  -5   6   5  850.46   67.83
  -5   6   5  769.49   70.12
   5   6  -5  895.75   68.05
  13  -3  -3  168.88   14.74
 -13   3   3  134.48   16.21
 -13   3   3  135.15   17.53
 -13  -3   3  174.95   15.00
 -13  -3   3  179.25   13.89
  -4   0  -9   -5.10    6.56
  -4   0  -9    8.89    9.63
   5  -2   8   37.60    6.22
  -5   2  -8   35.65    6.72
  -5   2  -8   33.23    9.53
  -5  -2  -8   25.24    8.87
 -11  -4   0   90.42    8.51
 -11   4   0   81.10   12.88
 -11   4   0   63.55   10.18
 -11  -4   0  116.73    9.40
 -11  -4   0   94.33   10.29
  11  -4   0   88.53    9.50
 -11  -4   0   99.15   10.03
  -3   2  -9   18.59    6.34
  -3  -2  -9    9.77    7.78
  -3  -2  -9    9.75    9.19
  -3  -2  -9   17.14    7.47
  -3   2  -9   26.16    8.66
   3  -2   9    5.54    5.55
   2   4  -9  125.86   12.17
   2   4  -9  139.75   12.14
  -2  -4   9  140.79   11.89
   2  -4  -9  126.15   14.22
   2  -4  -9  137.97   14.60
   2  -4  -9  134.74   11.85
  -8  -2  -6   51.64   10.15
  -8  -2  -6   43.28    7.44
   8  -2   6   39.05    6.50
  -8   2  -6   33.20   11.02
  -8  -2  -6   31.60    9.07
  -8   2  -6   36.98    7.33
   2   0 -11   -0.18    8.12
   2   0 -11    4.85    8.12
   2   0 -11   -4.92    6.93
  -7   6   1   25.66    5.29
  -7   6   1   32.97   10.65
   7  -6  -1   32.68    6.19
  -7  -6   1   42.34    5.76
  -7  -6   1   37.61    5.23
  -7   6   3  117.15   16.15
  -7   6   3  129.24   11.52
   7   6  -3  137.26   11.48
 -10   5   3    1.25    4.19
 -10   5   3    1.82   10.14
 -10  -5   3   -1.19    4.06
  10  -5  -3    2.36    5.60
   7  -3 -10   -4.51    8.16
   7   3 -10    8.40    3.61
   7  -3 -10    3.26    7.06
  13   2   0    8.28    4.39
 -13  -2   0   16.73    4.76
 -13  -2   0   14.91    7.49
 -13   2   0   25.30    9.88
  13  -2   0   15.79    5.15
 -13   2   0   17.24    8.41
  -7  -4  -5  117.33   11.42
  -7  -4  -5  104.83   12.39
  -7  -4  -5   96.67   11.49
   7  -4   5   99.75   10.18
  -7   4  -5  116.02   11.96
  -7   4  -5   85.04   10.98
  -4   4  -7    1.78    5.55
  -4  -4  -7    8.26    6.59
  -4  -4  -7   -3.56    7.81
  -4   4  -7    9.80    6.25
  -4  -4  -7    5.17    8.98
   4  -4   7   -0.71    4.77
  11   0 -10   14.27    5.96
 -11   0  10   11.56    8.16
  14   0  -1   -4.30    4.28
 -14   0   1    2.28    5.75
 -14   0   1   -5.20    8.50
  10  -5  -2  237.15   21.66
 -10  -5   2  289.19   21.42
 -10   5   2  228.01   23.94
 -10   5   2  244.55   21.45
  -1  -5  -7   60.58    6.79
  -1   5  -7   48.15    7.70
   1  -5   7   55.76    6.57
  -1   5  -7   60.49    7.13
  -1  -5  -7   57.73    9.82
  -1  -5  -7   56.53   10.19
  13  -3  -5    3.32    5.10
 -13   3   5   -4.33    6.98
 -13  -3   5   -4.04    4.65
 -13   3   5   -5.74    9.49
   2   3 -10   81.07    8.95
   2  -3 -10   75.84   11.19
   2  -3 -10   88.02   10.97
   2   3 -10   92.15    8.99
 -10   3   9  181.76   19.84
  10  -3  -9  187.19   17.27
  -6   0  -8   55.32   11.52
   6   0   8   57.17    7.65
  -6   0  -8   59.14    8.23
  -4   3  -8  444.84   37.04
   4  -3   8  464.86   36.47
  -4   3  -8  451.08   36.74
  -4  -3  -8  439.34   37.28
  -3   6  -4   97.36   10.56
  -3   6  -4   93.49   13.13
  -3  -6  -4  121.24   10.50
  -3  -6  -4  121.09   13.04
  -3  -6  -4  114.49   12.43
   3  -6   4  107.40   10.45
   5  -5   5  125.57   11.98
  -5  -5  -5  145.13   13.26
  -5  -5  -5  137.42   13.72
  -5   5  -5  110.65   12.16
  -5  -5  -5  135.17   12.36
  -5   5  -5  115.79   13.94
 -14   2   4  173.58   16.62
 -14   2   4  144.31   15.23
 -14  -2   4  163.09   14.26
  14  -2  -4  163.74   14.00
 -14  -2   4  156.60   13.32
   2  -4   8   11.34    4.70
  -2   4  -8    4.89    5.54
  -2   4  -8    9.21    5.64
  -2  -4  -8    8.77    6.14
   1  -6   5  549.03   46.16
  -1   6  -5  602.61   46.49
  -1  -6  -5  609.89   47.22
  -1  -6  -5  601.98   46.16
  -1   6  -5  495.49   47.15
  -1  -6  -5  618.14   47.56
  10  -5  -4   79.99    9.27
 -10   5   4   65.60    7.82
 -10   5   4   69.74   13.17
 -10  -5   4   85.51    7.82
 -13  -1  -1   31.92    9.11
  13  -1   1   26.94    5.58
 -13   1  -1   40.00    7.47
  13   1   1   24.66    5.17
 -13   1  -1   36.12   10.56
 -13  -1  -1   20.42    5.67
   8   1 -11    0.31    5.85
   8  -1 -11    6.85    7.29
   8  -1 -11    0.77    6.38
   8   1 -11   -0.14    5.55
 -13   3   2    2.96    8.48
 -13   3   2   -2.25    9.46
 -13  -3   2    1.90    3.77
  13  -3  -2    4.36    5.19
 -13  -3   2    1.84    6.41
 -14   0   7    0.25    2.84
 -14   0   7    6.65    6.67
   7   4  -9   84.41    7.60
  -7   4   9   61.65   15.71
   7  -4  -9   57.21   11.20
  -4   1  -9   61.22    8.52
  -4   1  -9   48.86   11.98
  -4  -1  -9   64.24   10.99
  -4  -1  -9   66.83    8.90
   4  -1   9   75.25    8.11
  -4  -1  -9   58.95   11.12
  10  -4   2   44.45    7.18
 -10  -4  -2   55.62    7.29
 -10  -4  -2   59.61    8.52
 -10  -4  -2   47.81    8.40
 -10   4  -2   41.52    7.85
 -10   4  -2   43.10   10.20
   2   1 -11   36.84    7.58
   2   1 -11   25.08    8.75
   2  -1 -11   34.93    9.14
   2  -1 -11   42.71    8.12
   2   1 -11   38.55    8.98
  10   0   5    3.84    5.50
 -10   0  -5   12.54   10.97
 -10   0  -5    2.28    6.14
  -2   0 -10  225.77   18.97
  -2   0 -10  213.55   20.52
  -2   0 -10  189.08   20.20
   9  -5  -6    3.96    7.08
   9   5  -6   16.64    3.29
  -9   5   6   16.75    3.51
  14  -2  -3    8.09    4.63
 -14   2   3    4.71    8.56
 -14  -2   3   11.02    3.97
 -14  -2   3    4.96    6.21
 -14   2   3  -11.20    8.22
 -12  -4   3    0.14    4.77
 -12   4   3    4.78    9.63
 -12   4   3   -5.33    5.98
  12  -4  -3    4.04    4.97
  -9  -5  -1  151.17   13.12
  -9  -5  -1  144.02   13.01
  -9   5  -1  120.26   15.71
  -9   5  -1  115.15   12.90
  -9  -5  -1  153.26   12.82
 -11   0  -4  289.49   24.31
  11   0   4  289.50   23.98
 -12   2  -2  173.00   21.10
  12   2   2  231.81   18.42
 -12  -2  -2  232.89   18.74
 -12   2  -2  227.28   20.02
  12  -2   2  206.71   18.58
 -12  -4   4    0.37    4.23
 -12   4   4    2.44    9.84
 -12   4   4    2.86    5.56
  12  -4  -4    3.95    5.23
 -14  -2   5   11.52    3.44
 -14  -2   5   -4.30    5.04
 -14   2   5   -5.66    6.91
  14  -2  -5   -0.37    4.44
 -14   2   5    4.35    8.46
   1  -4  -9    8.13    4.64
   1   4  -9    5.22    5.18
   1  -4  -9    5.86    7.74
   1   4  -9    3.45    4.95
   1  -4  -9    8.81    8.62
  -1  -4   9   -0.60    4.42
 -10   2  10    1.46   10.85
 -10  -2  10   29.75    5.90
  10  -2 -10    1.68    7.34
 -11   1  10  158.85   16.56
  11  -1 -10  156.29   14.57
 -11  -1  10  149.28   14.63
   7  -6   0   97.35   10.32
  -7   6   0   88.17    9.96
  -7   6   0   73.13   13.48
  -7  -6   0  114.33    9.83
  -7  -6   0  125.29   10.40
  14  -1  -1   24.45    5.17
 -14   1   1   21.20    7.91
 -14  -1   1   23.20    5.22
  14   1  -1   23.69    4.72
 -14  -1   1   19.55    8.04
 -14   1   1   18.98    9.49
   4  -5  -8   11.82    8.76
  -4  -5   8    9.35    3.63
   4   5  -8    9.80    4.46
  -4   5   8   16.85    3.03
  -2  -3  -9  166.17   15.89
  -2  -3  -9  166.22   17.21
  -2  -3  -9  199.36   16.51
  -2   3  -9  143.49   15.26
  -2   3  -9  178.01   15.00
   2  -3   9  157.92   14.63
   7   6  -4   53.87    5.95
  -7   6   4   40.10   11.98
  -7   6   4   58.88    6.00
  -6  -6   5   15.31    2.12
  -6   6   5   19.29   11.94
  -6   6   5   14.34    3.74
   6   6  -5   18.46    4.10
 -10  -5   1   75.45    8.06
 -10  -5   1   70.99    7.35
 -10  -5   1   70.00    7.53
 -10   5   1   56.36    8.31
 -10   5   1   65.88   12.98
  10  -5  -1   74.47    8.20
   3  -5  -8   53.54   10.52
   3  -5  -8   66.55    6.20
  -3  -5   8   57.67    6.33
   3  -5  -8   65.43    9.89
   3   5  -8   59.83    6.97
   9   0 -11   -3.78    6.70
   9   0 -11    2.05    5.83
   5   2 -11   26.86    6.50
   5  -2 -11   10.32    7.81
   5   2 -11   27.67    7.35
   5  -2 -11   14.92    8.21
  -6   1  -8   19.39    6.75
  -6  -1  -8    9.51    9.50
  -6  -1  -8   15.56   10.27
  -6   1  -8   10.37   10.68
  -6  -1  -8   23.67    6.80
   0   7   0    0.87    9.24
   0  -7   0   -1.93    5.14
   0   7   0   -2.21    3.99
   9   0   6  148.34   12.79
  -9   0  -6  104.12   15.72
   8  -5  -7   10.56    7.87
  -8   5   7   15.05    3.03
  -8   5   7   22.55   12.37
   8   5  -7   15.45    3.62
   8  -3 -10  276.10   24.42
   6  -2 -11   13.54    7.55
   6  -2 -11   12.93    8.40
  -6  -3  -7   68.13    9.03
  -6  -3  -7   56.35   10.33
  -6   3  -7   38.60    7.38
  -6  -3  -7   26.85    9.30
  -6   3  -7   40.64    9.09
   6  -3   7   48.70    6.73
 -14  -1   7  109.40   11.08
  14  -1  -7  102.53   10.54
 -14  -1   7  125.63    9.90
 -14   1   7  114.92   12.78
  -7  -2  -7    3.54    9.64
  -7   2  -7   -6.97   10.33
  -7   2  -7    7.82    6.40
  -7  -2  -7   -0.80    8.61
  -7  -2  -7   -4.22    6.91
 -12  -4   2   74.64    6.82
 -12  -4   2   55.09    7.74
 -12   4   2   49.38    8.37
  12  -4  -2   47.47    7.50
 -12  -4   2   76.45    6.42
   1   0 -11    2.64    8.81
   1   0 -11   15.71    8.70
   1   0 -11    6.43    6.92
  -6  -4  -6  126.68   12.61
   6  -4   6  110.83   11.14
  -6  -4  -6  137.05   13.72
  -6  -4  -6  134.85   12.73
  -6   4  -6  110.07   12.34
  -6   4  -6   99.64   12.00
   4  -2 -11   36.69    8.86
   4   2 -11   33.94    8.09
   4  -2 -11   33.30    8.53
   4   2 -11   28.28    5.96
   4   2 -11   43.62    7.13
  -5   5   8   -8.85   13.63
   5  -5  -8    4.19    8.76
   5   5  -8    6.22    3.99
  -5  -5   8   -3.67    2.07
  -5   5   8    0.43    2.26
   1  -2  10    3.04    5.03
  -1   2 -10   -1.69    5.92
  -1  -2 -10    3.42    7.62
  -1   2 -10    5.00    7.75
  -1  -2 -10    2.59    7.59
  -1  -2 -10   -1.20    8.99
   1  -7   0   99.50    9.55
  -1   7   0  101.71    8.87
  -1  -7   0   79.27    9.23
  -1   7   0  108.23   13.00
   1   7   0   66.80   12.18
   1   7   0   76.79    8.27
 -10  -1  -5   -5.74    9.48
 -10  -1  -5    8.73    6.20
  10  -1   5   -4.04    5.38
  10   1   5    5.38    5.72
 -10   1  -5    9.94   10.59
  -2   1 -10   -3.52    6.33
  -2  -1 -10    2.55    9.36
  -2  -1 -10   -7.05    7.25
  -2   1 -10    7.23    9.59
  -2  -1 -10   -4.11    9.46
  -3  -6   6    2.81    3.14
  -3   6   6   -0.95    2.82
  -3   6   6   11.19   12.93
   3  -6  -6   -9.44    8.46
   3   6  -6    0.58    4.01
 -13   3   6  127.88   14.60
  13  -3  -6  158.14   14.58
 -13  -3   6  179.47   13.69
 -13   3   6  158.54   17.44
 -12  -3  -1   -2.09    7.03
 -12   3  -1    0.95    9.55
  12  -3   1    7.11    5.29
 -12  -3  -1   -0.88    4.80
 -12  -3  -1    3.40    7.32
   0   7   1  175.04   19.65
   0   7  -1  190.31   18.96
   0  -7  -1  195.31   17.56
   0   7   1  197.90   16.55
   0  -7   1  206.55   16.95
   1  -3 -10   71.86   10.59
   1  -3 -10   74.25    8.74
   1  -3 -10   75.15   11.19
   1   3 -10   68.09    8.49
  -1  -3  10   84.50    8.17
   1   3 -10   73.49    8.65
   1  -7  -1   62.99    8.97
  -1   7   1   71.44    7.53
  -1   7   1   81.94   12.36
   1   7  -1   81.18   11.46
  -1  -7   1   80.04    8.17
 -11   1  -4  375.21   31.27
  11  -1   4  386.15   30.86
 -11  -1  -4  333.77   32.55
 -11  -1  -4  377.80   31.05
  11   1   4  391.48   30.81
   2  -5  -8    8.37    3.49
  -2  -5   8    8.59    3.85
   2   5  -8   11.94    4.82
  -2   6   6   15.38    3.18
   2  -6  -6   12.58    8.68
  -2   6   6   13.84   13.59
   2   6  -6    9.23    4.62
  -2  -6   6   11.95    3.82
 -12   0  -3   -2.82    5.60
  12   0   3   -0.15    4.94
 -12   0  -3  -13.17    9.91
 -12   4   5   11.52    5.54
 -12   4   5    3.24   10.21
  12  -4  -5    4.10    5.68
 -12  -4   5   -0.32    4.02
 -10   5   5    5.54    3.90
  10  -5  -5    8.08    6.43
  10   5  -5    9.86    2.96
 -14   2   2   29.10    9.33
 -14  -2   2   48.69    5.45
 -14   2   2   30.81    9.25
  14  -2  -2   29.80    5.58
  -4   6   6   29.34   13.93
   4   6  -6   30.92    5.46
  -4  -6   6   29.49    3.94
  -4   6   6   30.52    3.92
  11  -4  -7  808.51   35.52
  11   4  -7  882.20   33.71
 -11   4   7  825.55   38.23
  -6   6  -2    0.99    9.43
   6  -6   2   -2.97    4.97
  -6  -6  -2    4.21    5.78
  -6  -6  -2   -1.01    4.71
  -6  -6  -2    0.39    6.47
  -6   6  -2    5.02    5.05
   5  -6   3    6.59    4.94
  -5   6  -3   -5.66    9.28
  -5  -6  -3   -3.64    7.22
  -5  -6  -3    2.71    4.64
  -5  -6  -3    7.47    6.42
   7  -2 -11   23.39    7.73
   7  -2 -11   17.45    8.20
   9  -1 -11   47.47    7.62
   9  -1 -11   53.72    8.63
   8   4  -9   59.46    6.17
  -8   4   9   92.03   14.89
   8  -4  -9   64.79   10.35
 -14   2   6  613.45   53.56
 -14  -2   6  711.00   51.90
 -14   2   6  590.68   52.07
  14  -2  -6  648.57   52.12
   1   7   1   -1.80   10.40
   1  -7   1   37.82    6.04
   1   7   1   30.95    5.14
  -1  -7  -1   21.46    7.46
  -1   7  -1   43.34    5.70
  -1   7  -1   63.51   10.35
 -13  -3   1   14.34    6.95
 -13  -3   1   12.41    4.33
 -13   3   1    6.36    9.59
 -13   3   1   -1.08    8.74
  13  -3  -1   16.98    5.28
 -12   2   9    7.49    9.22
  12  -2  -9    0.88    6.31
  -2   7   1   67.71    6.79
  -2   7   1   60.08   11.88
   2  -7  -1   79.91    8.54
  -2  -7   1   37.17    6.84
   2   7  -1   30.39   10.28
   3   2 -11    0.95    5.89
   3  -2 -11    4.98    8.21
   3  -2 -11    6.79    7.86
   3   2 -11    0.87    5.84
   3   2 -11    5.71    7.80
  10  -4  -8  294.08   25.62
  10   4  -8  298.30   23.69
 -10   4   8  273.93   27.74
   2   7   0   13.55    9.33
   2  -7   0    2.92    5.26
  -2   7   0   10.46    9.72
  -2  -7   0    6.35    5.60
  -2   7   0    9.77    4.52
  -9   1  -6   -7.06   10.89
  -9  -1  -6   -2.86    6.06
   9   1   6    0.17    5.39
  -9  -1  -6   -2.12    9.70
   9  -1   6    5.38    5.40
  -9   1  -6   -3.65    6.19
  -2   6  -5  285.18   26.95
  -2  -6  -5  328.12   26.81
   2  -6   5  299.82   25.66
  -2   6  -5  300.10   25.91
  -2  -6  -5  331.69   25.57
  -2  -6  -5  348.42   27.44
 -13   2   8   10.33    9.19
  13  -2  -8   22.33    5.93
   6   5  -8  276.28   24.03
  -6   5   8  278.32   28.62
   6  -5  -8  296.90   26.04
  -6   5   8  305.92   23.50
   1  -1 -11   92.94   11.90
   1   1 -11   77.62   11.40
   1  -1 -11   84.50   11.17
   1  -1 -11  110.01   11.05
   1   1 -11   83.21   11.57
   1   1 -11   81.44   10.21
  -4  -5  -6  401.19   31.62
  -4  -5  -6  380.77   31.91
  -4  -5  -6  377.61   30.90
   4  -5   6  374.13   30.55
  -4   5  -6  376.05   31.07
  -4   5  -6  353.66   31.54
  -1  -6   6   17.77    4.09
   1  -6  -6   10.86    7.24
   1  -6  -6   14.80    8.50
   1   6  -6   13.09    4.84
  -2  -5  -7  115.57   12.79
  -2  -5  -7  112.39   10.19
  -2  -5  -7  110.47   12.14
   2  -5   7   93.94    9.67
  -2   5  -7  100.36   10.29
  -2   5  -7   85.64   10.72
  11  -4   1  107.33   10.22
 -11   4  -1   78.70   11.25
 -11  -4  -1   98.84   10.91
 -11   4  -1   80.43   13.27
 -11  -4  -1  114.34   10.24
 -13   0   9    1.25    7.48
  -8   6   2    9.04   10.68
  -8   6   2    5.30    4.41
   0   4  -9   -1.64    5.49
   0   4  -9    0.91    5.08
   0  -4  -9    4.09    8.24
   0  -4  -9    1.75    9.02
   0  -4   9    6.33    4.61
   0  -4  -9    4.65    5.28
   1   7  -2  274.65   18.87
   1  -7  -2  204.11   19.43
  -1   7   2  214.18   18.17
   1   7  -2  209.16   20.44
  -1   7   2  206.49   21.68
  -1  -7   2  197.19   18.32
  12   1   3   78.17    8.64
  12  -1   3   84.86    8.73
 -12  -1  -3   82.38    8.95
 -12   1  -3   65.60   13.06
 -12   1  -3   83.95    9.89
  14   0   0  397.08   31.47
 -14   0   0  384.76   32.05
 -14   0   0  378.45   33.36
 -12   3   8    4.49   10.75
  12  -3  -8   10.42    6.83
  15   0  -4  149.67   12.65
 -15   0   4  146.72   14.14
 -15   0   4  133.31   13.77
   1  -5  -8   -0.32    3.95
   1   5  -8    2.30    4.87
   1   5  -8    3.55    5.02
  -1  -5   8    1.08    3.88
   8   6  -3   28.88    4.38
  -8   6   3   29.20   11.35
  -8   6   3   24.66    4.96
  -5   6   6   12.26    3.18
   5   6  -6   14.62    4.43
  -5   6   6   14.32   12.11
   8   0   7   -5.58    5.54
  -8   0  -7   -0.30   10.63
   0   7  -2   23.01    9.06
   0  -7  -2    4.20    6.89
   0   7   2   -8.44   11.15
   0   7   2    8.55    3.89
   0  -7   2   21.96    4.68
  12  -4  -1  203.96   19.34
 -12  -4   1  241.99   18.97
 -12  -4   1  262.89   19.42
 -12   4   1  198.80   20.07
 -12  -4   1  236.24   19.75
  -7   6  -1   14.20   10.01
   7  -6   1    4.29    5.23
  -7  -6  -1   19.97    6.22
  -7  -6  -1   20.24    5.54
  -7  -6  -1    9.13    4.78
  -7   6  -1    8.63    5.07
  -4  -6  -4  -19.60    8.02
  -4  -6  -4  -10.49    5.07
  -4   6  -4   -1.80    4.91
  -4   6  -4    1.48    8.91
   4  -6   4    0.14    4.72
  -4  -6  -4  -16.09    7.89
  -2   7   2   11.82   10.76
  -2  -7   2    7.85    4.59
  -2   7   2    6.15    3.87
   2   7  -2    7.35    4.21
   2  -7  -2   10.01    6.70
 -10  -5   0   22.10    5.61
 -10   5   0   18.15    5.66
  10  -5   0   19.94    5.93
 -10   5   0    8.74   10.43
 -10  -5   0   20.56    5.16
 -15   0   5    1.49    6.69
 -15   0   5   -2.16    5.39
  15   0  -5   -5.16    4.04
   2  -7   1  219.31   19.13
  -2   7  -1  191.74   21.43
  -2   7  -1  260.21   19.31
  -2  -7  -1  210.14   19.61
   2   7   1  227.25   18.73
   2   7   1  206.61   21.61
  -7   6   5   -2.03   11.11
  -7   6   5    1.55    3.34
   7   6  -5    0.59    3.45
  -8  -6   1  220.80   16.10
  -8   6   1  183.94   16.36
   8  -6  -1  167.70   16.57
  -8   6   1  174.07   19.50
  -3   7   1   60.29   12.37
   3   7  -1   60.49    6.90
   3  -7  -1   69.77    8.29
  -3   7   1   68.60    7.37
  -3  -7   1   66.28    7.53
  -8  -5  -3    8.83    6.36
  -8  -5  -3    1.15    5.83
  -8  -5  -3    4.50    6.92
  -8   5  -3    0.81    5.48
   8  -5   3    1.48    5.29
  -8   5  -3    3.34    9.56
  -9   3  10  152.34   18.04
   9  -3 -10  122.60   13.98
  -7  -5  -4    2.26    6.91
   7  -5   4    3.35    5.39
  -7   5  -4    0.31    8.87
  -7  -5  -4    9.16    5.88
  -7  -5  -4    6.32    7.43
 -13  -2  -1   10.68    8.30
  13   2   1   -2.92    4.55
 -13   2  -1   -9.73    8.30
 -13  -2  -1    2.44    4.86
 -13   2  -1    6.71   10.15
  13  -2   1   -0.15    5.13
   8  -2 -11   29.48    8.58
   8  -2 -11   30.15    7.87
 -10  -3  -4   67.90   10.42
 -10  -3  -4   79.89    8.85
 -10   3  -4   53.33    9.72
 -10  -3  -4   76.79   10.77
  10  -3   4   62.92    8.00
   4  -2   9    4.38    5.59
  -4  -2  -9    0.74    7.76
  -4  -2  -9   -9.88   10.21
  -4   2  -9   -7.15    9.07
  -4   2  -9    0.59    5.93
  -4  -2  -9    1.93    8.37
  10   0 -11   -4.36    6.52
  11  -3  -9  213.27   19.56
 -11   3   9  224.60   21.98
 -15   0   3    3.34    6.47
  15   0  -3   -0.90    4.25
 -14   0   8   38.82    7.71
 -12   0  10  225.22   20.29
  -9   3  -5    9.68    9.39
  -9  -3  -5   16.91    6.98
  -9  -3  -5    1.54    7.81
  -9  -3  -5    6.92    8.65
   9  -3   5   16.89    5.73
  -9   3  -5    6.14    7.16
  -3  -4  -8   11.20    9.16
  -3  -4  -8    4.58    6.30
  -3   4  -8   -4.48    5.76
  -3   4  -8    0.19    5.71
   3  -4   8    5.86    4.81
  -3  -4  -8    2.57    7.97
 -13   1   9   21.45    8.55
 -13  -1   9   15.46    5.81
  13  -1  -9   20.12    5.71
   2  -2 -11  349.07   28.83
   2   2 -11  321.19   27.95
   2   2 -11  333.41   27.94
   2  -2 -11  367.72   29.50
   2   2 -11  325.88   28.77
   3  -7   0   16.87    5.72
  -3  -7   0   22.17    6.04
  -3   7   0   19.78   10.21
  -3   7   0    9.05    4.62
   0   6  -6    7.10    6.69
   0  -6   6    0.11    4.00
   0  -6  -6   -4.26    8.77
   0  -6  -6    4.67    7.60
   0  -6  -6    3.84    3.97
   0   6  -6    4.97    4.76
 -12   4   6  187.50   21.36
 -12   4   6  239.64   24.62
 -12  -4   6  288.47   21.05
  12  -4  -6  274.57   22.06
  -1   7  -2  115.28   11.52
  -1  -7  -2   69.43   10.43
   1   7   2   73.49   13.81
   1  -7   2  121.44    8.13
   1   7   2   32.39    6.93
 -13   0  -2    0.89   10.06
 -13   0  -2   -1.35    6.07
  13   0   2    0.59    5.01
   0   0 -11   -8.72    7.35
   0   0 -11   -6.29    8.66
   0   0 -11    3.08    8.95
 -14   1   0   93.29   10.74
 -14   1   0   65.47   12.35
  14   1   0   95.41    8.40
  14  -1   0   77.38    8.53
 -14  -1   0   66.37   11.23
 -14  -1   0   76.02    8.62
   0  -3 -10  151.04   13.97
   0  -3 -10  176.60   15.38
   0  -3 -10  176.49   16.14
   0   3 -10  140.24   13.76
   0  -3  10  136.68   13.13
   0   3 -10  136.13   13.59
  -7   5   8  191.01   15.08
   7   5  -8  183.30   15.76
  -7   5   8  154.83   21.33
   7  -5  -8  170.54   18.18
 -15   1   4   10.12    8.08
 -15   1   4    4.51    7.20
  15  -1  -4   17.71    4.91
 -15  -1   4    4.24    6.25
 -15  -1   4   11.90    5.10
  -3  -7   2    2.94    3.94
   3  -7  -2    1.95    6.55
   3   7  -2    4.18    3.83
  -3   7   2   12.33    4.46
  -5   0  -9   10.82   10.28
  -5   0  -9   15.54    7.16
  -5   4  -7   17.34    6.42
  -5  -4  -7   23.03    7.86
  -5  -4  -7   14.97    8.80
   5  -4   7   14.00    5.30
  -5   4  -7   13.15    6.69
  -5  -4  -7   19.61    7.88
  11  -2 -10  282.57   24.39
 -11   2  10  284.76   26.03
 -14   2   1   35.73   10.04
 -14   2   1   39.72   10.30
  14  -2  -1   51.74    6.99
 -14  -2   1   49.90    6.06
 -14  -2   1   49.70    9.09
   8   1   7   16.96    5.67
  -8  -1  -7    4.25    9.75
  -8   1  -7   13.47    6.26
  -8   1  -7    4.71   10.42
   8  -1   7   -1.91    5.56
  -8   6   4  199.80   16.81
   8   6  -4  205.07   16.76
  -8   6   4  191.76   21.00
  -9   5   7   -0.23    2.91
   9  -5  -7    7.23    7.59
   9   5  -7    0.10    2.85
 -13   3   7   -4.46    9.93
  13  -3  -7    0.67    5.86
 -15  -1   5   46.49    6.82
  15  -1  -5   55.75    6.20
 -15   1   5   34.14    8.94
 -15   1   5   42.62    7.36
 -15  -1   5   47.13    6.79
 -10   5   6   -2.13    3.38
  10  -5  -6    4.53    6.97
  10   5  -6    0.61    2.80
  -9  -5  -2   29.12    6.62
  -9  -5  -2   27.20    7.04
  -9  -5  -2   22.76    6.32
  -9   5  -2   16.34   10.31
  -9   5  -2   18.57    6.11
 -11  -3  -3   60.89    7.47
  11  -3   3   45.34    6.77
 -11  -3  -3   38.11    9.51
 -11   3  -3   43.75    9.38
 -11  -3  -3   45.16    9.34
 -11   3  -3   42.47   11.04
  -6   2  -8   13.03   10.40
  -6  -2  -8   11.75    8.58
   6  -2   8    9.10    5.77
  -6   2  -8   19.14    6.41
 -15   0   6   28.31    5.31
 -15   0   6   25.21    7.29
  -3   0 -10   -4.08   10.07
  -3   0 -10    1.55    9.82
  -3   0 -10   -2.08    7.00
  -6   5  -5   23.15    6.55
  -6  -5  -5   24.39    8.10
  -6  -5  -5   27.11    6.73
  -6  -5  -5   18.10    7.26
  -6   5  -5   21.04    8.78
   6  -5   5   18.18    5.60
  -6   6   6   34.56   12.89
  -6   6   6   37.97    4.64
   6   6  -6   31.34    5.25
  -9   4   9  129.92   18.01
   9  -4  -9  134.48   14.40
   9   4  -9  136.89   11.61
 -14  -2   7   44.80    4.93
 -14   2   7   46.10    9.85
  14  -2  -7   44.15    6.52
 -10   1  11  144.37   15.75
  10  -1 -11  124.55   13.24
 -15   1   3    9.50    8.22
 -15  -1   3    3.72    6.38
 -15   1   3    6.88    7.57
 -15  -1   3    4.39    4.90
  15  -1  -3    1.57    4.91
  14  -1  -8   -2.91    4.62
 -14  -1   8    0.43    5.48
 -14   1   8   -0.51    7.65
  -5  -3  -8   -4.92    7.84
  -5  -3  -8    0.25    7.69
  -5   3  -8    4.56    5.98
  -5   3  -8  -12.95    7.77
   5  -3   8    1.80    5.27
  -5  -3  -8   -7.37    9.21
 -12   1  10   42.27   10.16
  12  -1 -10   36.45    7.30
 -12  -1  10   45.39    7.55
  11  -5  -3   16.97    5.83
 -11   5   3    3.90    4.63
 -11   5   3    2.26   10.26
 -11  -5   3    6.42    4.37
  -3  -3  -9   20.51    7.70
  -3   3  -9   24.03    7.70
   3  -3   9   33.27    6.03
  -3   3  -9   25.71    6.69
  -8   3  -6  234.47   20.51
  -8  -3  -6  263.89   20.66
  -8  -3  -6  210.54   21.23
  -8   3  -6  199.05   21.30
  -8  -3  -6  255.88   22.09
   0  -5  -8   19.82    8.74
   0  -5  -8   16.51    8.00
   0  -5  -8    9.03    4.64
   0   5  -8   23.79    5.40
   0   5  -8   11.84    5.56
   0  -5   8   17.58    4.56
  -9  -4  -4   17.72    7.43
  -9  -4  -4   11.99    8.62
  -9   4  -4   14.84    8.46
  -9  -4  -4   20.82    7.06
 -10   2  -5   -0.29   10.91
 -10  -2  -5    0.84    8.66
  10  -2   5   14.89    5.75
 -10   2  -5    9.24    7.17
 -10  -2  -5    9.49    6.36
  -2  -2 -10  103.68   13.47
   2  -2  10  105.16   10.19
  -2   2 -10   77.54   12.37
  -2  -2 -10  115.95   12.28
  -2  -2 -10   69.32   11.63
  -2   2 -10  113.45   10.73
   1   7  -3  676.79   43.21
  -1  -7   3  799.37   42.92
  -1   7   3  336.15   44.75
  -1   7   3  381.20   42.36
   1  -7  -3  340.50   43.35
  -2  -7   3   17.11    4.75
   2   7  -3   23.09    5.23
  -2   7   3    0.37   12.50
  -2   7   3    3.74    4.17
   2  -7  -3   16.20    8.19
  -3   7  -1   -1.26    9.44
   3   7   1    5.58   10.18
   3   7   1    1.85    3.88
  -3  -7  -1    2.71    6.35
   3  -7   1    7.04    5.10
  -3   7  -1    1.23    4.50
 -13   1  -2   32.25    7.59
 -13  -1  -2   22.57    9.66
 -13   1  -2   26.04   11.16
 -13  -1  -2   28.79    6.13
  13  -1   2   16.74    5.65
  13   1   2   27.40    5.58
  11  -2   4   50.17    7.23
  11   2   4   57.37    7.03
 -11  -2  -4   47.48    7.82
 -11  -2  -4   51.39   10.25
   0  -1 -11   14.29    9.17
   0  -1 -11   12.01    8.80
   0  -1 -11   23.66    7.90
   0   1 -11   15.97    9.63
   0   1 -11   15.33    7.28
   0   1 -11   13.69    9.37
  -8   6   0   28.08    6.26
  -8  -6   0   59.59    6.14
  -8  -6   0   42.66    6.64
  -8  -6   0   53.63    6.01
  -8   6   0   28.64   11.28
   8  -6   0   30.33    6.73
  -3  -6  -5   -0.22    7.08
  -3   6  -5    0.74    5.01
   3  -6   5    3.52    4.75
  -3   6  -5  -15.44    8.59
  -3  -6  -5    8.15    7.80
  -3  -6  -5   -5.49    4.93
 -11  -5   4   16.72    4.36
 -11   5   4    9.60    4.60
  11  -5  -4   10.18    6.00
  13  -3   0  112.15   10.52
 -13   3   0   97.09   13.59
 -13  -3   0  108.13   10.10
 -13  -3   0  107.37   11.92
 -13   3   0   81.71   13.49
  -4   7   1    3.86    4.28
  -4   7   1    7.16   10.48
  -4  -7   1   -2.29    5.01
   4  -7  -1   11.44    6.02
   4   7  -1    3.27    3.68
  15   0  -2  146.94   12.25
 -15   0   2  127.74   14.26
 -15   0   2  124.76   13.13
  -5  -1  -9   97.38   10.42
  -5  -1  -9   84.60   12.82
  -5   1  -9   61.80   13.10
  -5  -1  -9   72.15   13.01
  -5   1  -9   84.37    9.88
  -8  -4  -5   30.93    8.51
  -8  -4  -5   33.56    9.06
  -8   4  -5   31.75    7.84
  -8   4  -5   22.89    8.38
  -8  -4  -5   35.31    7.88
   8  -4   5   36.70    6.21
 -11  -5   2   12.92    5.04
 -11   5   2    9.46    5.32
  11  -5  -2   13.21    5.71
 -11   5   2   22.48   10.57
   2   7   2   15.66    4.34
  -2   7  -2   10.50    9.04
   2  -7   2    6.77    4.68
  10  -4   3   44.64    6.48
 -10   4  -3   21.82    8.09
 -10  -4  -3   29.02    7.62
 -10   4  -3   22.09    9.64
 -10  -4  -3   25.40    8.37
 -10  -4  -3   23.11    6.89
   0   7  -3  234.57   23.10
   0  -7   3  237.77   21.06
   0   7   3  240.29   24.77
   0   7  -3  276.86   21.57
   0   7   3  261.49   21.02
   0  -7  -3  276.19   22.76
   9  -2 -11    1.75    6.31
   9  -2 -11    4.90    7.91
   1  -4   9   42.79    6.09
  -1  -4  -9   36.65    7.00
  -1   4  -9   35.45    6.60
  -1   4  -9   32.46    6.73
   4   7  -2   38.24    5.17
  -4   7   2   39.68    5.82
  -4  -7   2   30.37    5.09
   4  -7  -2   33.61    7.23
  -4   7   2   27.73   11.42
 -15  -1   6   -2.98    5.44
 -15  -1   6   -4.67    4.16
  15  -1  -6    0.78    4.20
 -15   1   6   -1.37    4.82
 -15   1   6    9.44    7.97
   1  -6   6   -0.24    4.30
  -1   6  -6    4.21    4.95
  -1  -6  -6   -1.47    7.91
  -1  -6  -6   -8.16    8.38
  -1   6  -6    8.68    7.17
  -1  -6  -6   -6.60    4.18
  -3   1 -10   50.14    7.93
   3  -1  10   50.00    7.00
  -3  -1 -10   45.24    8.52
  -3  -1 -10   22.10   10.22
  -3   1 -10   32.30   11.32
  -3  -1 -10   41.33   10.72
  -3   7   3  737.07   59.39
  -3   7   3  666.24   61.60
  -3  -7   3  683.53   59.13
   3  -7  -3  672.91   60.22
  -9   2  -6   36.31   12.05
  -9  -2  -6   55.95   10.80
   9  -2   6   68.87    8.03
  -9  -2  -6   65.73   11.46
  -9  -2  -6   64.39    8.78
  -9   2  -6   68.93    9.09
  14  -3  -4  228.58   19.53
 -14   3   4  187.31   20.63
 -14   3   4  227.19   22.48
 -14  -3   4  255.44   19.56
   4  -7   0  128.49   13.31
  -4   7   0  148.10   13.09
  -4   7   0  122.44   16.41
  -4  -7   0  168.63   13.39
   5  -4 -10   -1.58    9.25
   5  -4 -10    3.92   10.19
   5   4 -10    1.50    4.31
 -12  -4   0  163.11   14.52
 -12  -4   0  165.62   13.66
 -12   4   0  125.11   15.10
  12  -4   0  144.28   14.04
 -12  -4   0  158.98   14.29
   1  -2 -11   -7.01    8.36
   1   2 -11    9.63    7.37
   1  -2 -11   -6.28    9.27
   1   2 -11    3.52    6.22
   1   2 -11   -0.29    8.84
  -3  -5  -7   19.59    8.22
  -3   5  -7   16.19    6.82
   3  -5   7   17.76    5.07
  -3   5  -7   15.95    5.85
  -3  -5  -7   25.11    8.77
  -3  -5  -7   19.82    6.21
   7   0   8    2.88    5.68
  -7   0  -8    5.51    6.83
  -7   0  -8    6.29   10.02
   4  -4 -10   49.83   10.97
   4  -4 -10   42.60   10.03
   4   4 -10   46.29    6.28
  -6  -6  -3   84.36    8.33
  -6  -6  -3   69.84    9.13
  -6   6  -3   74.91    8.36
  -6   6  -3   50.99   11.61
   6  -6   3   56.59    8.17
  -6  -6  -3   68.30    9.48
 -14   3   3  127.89   17.23
 -14  -3   3  177.96   16.23
  14  -3  -3  181.83   15.73
 -14  -3   3  197.10   14.99
 -14   3   3  173.55   18.75
   6   0 -12  210.50   19.30
   6   0 -12  227.06   19.81
   5   0 -12  150.18   14.99
   5   0 -12  138.85   14.47
 -12  -2  -3  223.80   18.62
  12   2   3  218.21   18.17
  12  -2   3  203.30   18.33
 -12   2  -3  222.86   19.47
 -12   2  -3  197.09   21.32
  11  -4  -8  108.11   12.63
 -11   4   8  117.70   16.11
  11   4  -8  118.13    9.97
   8   5  -8   58.85    6.32
  -8   5   8   58.22    5.48
   8  -5  -8   56.73   10.55
 -12   3  -2    5.67   10.10
  12  -3   2    2.93    5.16
 -12  -3  -2   -1.52    5.59
 -12  -3  -2    1.80    7.69
 -14   3   5   55.36   10.96
 -14  -3   5   55.91    6.33
  14  -3  -5   46.04    6.88
 -14   3   5   47.73    9.01
 -10   5  -1   10.04    5.98
 -10   5  -1    4.40   10.57
  10  -5   1   12.14    5.54
 -10  -5  -1   11.86    5.66
 -10  -5  -1    6.42    6.04
   6  -4 -10   24.07    8.86
   6   4 -10   47.70    5.76
   6  -4 -10   22.11   10.04
  10  -3 -10   25.72    8.64
 -10   3  10   40.94   13.07
  15   1  -2   10.17    4.36
 -15   1   2   13.00    9.33
 -15  -1   2    4.39    7.70
 -15  -1   2   21.39    5.21
 -15   1   2    5.47    7.54
  15  -1  -2   10.84    4.97
  -8   6   5  163.46   18.88
   8  -6  -5  157.02   15.68
  -8   6   5  167.30   13.70
   8   6  -5  159.62   13.75
  -7   6  -2   -5.14    5.39
  -7  -6  -2   -7.39    6.06
  -7  -6  -2    2.41    5.27
  -7  -6  -2    7.04    6.61
   7  -6   2    0.48    5.48
  -7   6  -2    3.13   10.23
   3  -4 -10  152.82   15.88
  -3  -4  10  149.97   12.82
   3   4 -10  139.36   13.27
   3  -4 -10  153.75   15.29
  11  -5  -5    4.47    6.55
 -11   5   5    1.21    4.07
  -1   7  -3  161.33   12.82
   1   7   3   35.31    7.66
   1   7   3   47.39   14.51
  -1   7  -3  102.98    8.78
   1  -7   3  134.14    8.78
  -1  -7  -3   30.32   10.34
   5  -3 -11    4.25    7.97
   5  -3 -11    6.33    8.67
   5   3 -11    2.65    4.97
   5  -5   6    1.96    4.91
  -5  -5  -6    4.18    6.26
  -5  -5  -6   11.33    8.78
  -5  -5  -6    6.38    7.65
  -5   5  -6   13.13    7.77
  -5   5  -6    0.86    5.77
  -7  -4  -6   12.45    7.43
  -7  -4  -6   15.88    8.47
  -7   4  -6    1.68    6.99
   7  -4   6   10.49    5.47
  -7  -4  -6   11.18    7.81
  -7   4  -6    7.21    7.16
 -15   0   7    1.80    3.35
 -15   0   7    4.18    6.88
 -11   0  11    5.57    9.50
   7   0 -12  167.16   15.24
   7   0 -12  153.00   15.50
   7  -6  -6   43.45    9.53
  -7   6   6   49.99    5.23
   7   6  -6   46.00    5.77
  -7   6   6   36.75   13.46
  -5  -6  -4   36.29    7.54
  -5   6  -4   21.84    9.85
  -5  -6  -4   31.20    5.90
  -5  -6  -4   18.17    8.09
   5  -6   4   30.35    6.02
   4   0 -12  272.52   25.18
   4   0 -12  294.02   24.66
 -11  -5   1   41.34    5.57
 -11  -5   1   39.71    5.88
  11  -5  -1   32.96    6.59
 -11   5   1   46.74   12.18
 -11   5   1   30.85    6.73
 -11  -5   1   38.89    6.56
  12   4  -7   63.20    6.13
 -12   4   7   57.89   13.34
  12  -4  -7   68.93    8.90
 -13   4   4    7.43    7.21
  13  -4  -4   15.55    5.49
 -13  -4   4   11.88    5.01
 -13   4   4   -2.16   10.32
   4  -7  -3   96.27   12.94
   4   7  -3  135.47   11.61
  -4   7   3  129.85   11.47
  -4  -7   3  131.92   11.23
  -4   7   3  107.82   16.36
   6  -3 -11  141.97   14.72
   6  -3 -11  134.62   15.22
  -7  -3  -7    0.26    8.09
  -7  -3  -7    3.11    7.05
  -7   3  -7  -12.86    9.35
   7  -3   7   -3.42    5.67
  -7   3  -7   -1.77    6.46
  -7  -3  -7   -1.29    9.60
 -11   4  -2   18.37    8.06
  11  -4   2   11.31    5.67
 -11  -4  -2   15.70    5.93
 -11   4  -2   16.18   10.24
 -11  -4  -2    5.02    7.14
  13  -4  -3    3.16    5.35
 -13  -4   3   -9.35    5.41
 -13   4   3    3.49    7.19
 -13   4   3   -4.46    9.99
   4  -3 -11   28.75    9.23
   4  -3 -11   18.40    8.59
   4   3 -11   13.43    5.26
  -7   1  -8   53.63   12.33
   7  -1   8   61.67    8.40
  -7   1  -8   71.28    8.86
  -7  -1  -8   69.99   12.61
  -3   6   7   57.40   15.68
  -3   6   7   59.93    7.14
   3  -6  -7   47.67   11.87
  -3  -6   7   89.45    7.63
  -1  -3 -10   -2.28    9.66
  -1  -3 -10   -8.16    7.00
  -1  -3 -10    0.27    7.95
   1  -3  10   -4.55    5.38
  -1   3 -10   -1.05    6.59
  -1   3 -10    1.70    6.03
  13  -2  -9  190.65   16.96
 -13   2   9  186.17   19.16
 -14   0  -1    2.16    5.78
 -14   0  -1    1.48    9.79
  14   0   1   -6.43    5.01
  -9   6   3   45.33   12.15
  -9   6   3   35.04    5.54
  -9   6   2   42.92   12.95
  -9  -6   2   75.53    7.65
  -9   6   2   63.18    7.55
  -4   6   7    9.40    3.12
  -4  -6   7   15.78    3.49
  -4   6   7    0.48   14.59
   4   6  -7   13.23    4.83
  -1   0 -11   -2.63    9.43
  -1   0 -11   -3.88    9.33
  -1   0 -11    0.23    7.12
   1  -5   8  154.14   14.33
  -1  -5  -8  200.11   16.73
  -1  -5  -8  186.53   16.99
  -1   5  -8  150.03   14.98
  -1   5  -8  151.31   14.99
  -1  -5  -8  177.91   14.58
  -3   7  -2   58.52    7.34
  -3  -7  -2   63.24    9.16
   3   7   2   88.61   13.14
  -3   7  -2   55.28   11.38
   3  -7   2   66.28    7.39
   3   7   2   61.73    6.68
   6  -1 -12 1055.14   82.39
   6   1 -12  946.80   81.89
   6   1 -12  939.70   81.69
   5  -1 -12   14.44    8.23
   5   1 -12   28.60    8.39
   5  -1 -12   20.99    8.73
  -4  -7  -1   14.38    6.47
  -4   7  -1   18.38    5.01
  -4   7  -1   10.82    9.40
   4  -7   1   14.26    5.45
  14   2   0  205.14   16.59
 -14   2   0  180.07   18.79
  14  -2   0  192.92   16.90
 -14  -2   0  187.75   18.35
 -14   2   0  161.38   19.66
 -14  -2   0  210.17   16.76
   2  -6  -7   -6.51    9.20
   2  -6  -7    1.41    7.44
  -2   6   7   -1.17    3.09
   2   6  -7    2.02    4.47
   7   4 -10  378.21   31.93
   7  -4 -10  449.57   34.33
   7  -4 -10  420.38   33.35
 -15   2   4  134.97   15.81
 -15   2   4  114.54   14.62
  15  -2  -4  151.77   13.11
 -15  -2   4  147.71   12.47
 -15  -2   4  156.75   13.61
 -14   3   2   23.57    9.72
 -14  -3   2   10.40    7.44
  14  -3  -2   31.45    6.14
 -14   3   2   38.60   10.77
 -14  -3   2   27.84    4.82
  -8  -2  -7   66.01    9.57
  -8   2  -7   53.62   12.46
  -8  -2  -7   52.73   11.96
  -8   2  -7   86.63    9.15
  -8  -2  -7   51.55   10.89
   8  -2   7   70.15    8.55
   5   7  -1   68.83    7.20
  -5   7   1   64.04   12.80
  -5   7   1   69.28    7.67
   5  -7  -1   68.21    8.69
  -5  -7   1   75.58    7.68
  -5   7   2  242.60   19.66
   5  -7  -2  220.21   20.55
  -5  -7   2  240.98   19.32
  -5   7   2  214.71   23.15
   5   7  -2  237.30   19.53
 -13  -4   5   34.82    5.03
  13  -4  -5   37.20    6.76
 -13   4   5   32.40    7.71
 -13   4   5   33.71   11.53
  -8   6  -1  174.56   22.06
  -8  -6  -1  241.17   19.50
  -8  -6  -1  237.39   19.05
  -8   6  -1  205.47   19.30
   8  -6   1  208.28   19.14
  -8  -6  -1  247.41   19.15
   2  -4 -10   40.69    9.76
   2  -4 -10   51.64   10.52
   2   4 -10   47.70    6.70
  -2  -4  10   39.41    5.97
   7  -3 -11    3.89    7.77
   7  -3 -11    8.59    8.66
  15  -2  -5   10.37    5.09
 -15   2   5    9.68    7.26
 -15  -2   5   18.83    3.68
 -15  -2   5   16.92    5.05
 -15   2   5    3.72    8.77
  10  -4  -9   -3.61    8.51
  10   4  -9   -1.47    3.27
 -10   4   9  -12.63   13.16
 -15   0   1    7.04    8.80
 -15   0   1   -0.80    5.93
  15   0  -1    0.26    4.40
 -11   0  -5    2.02    6.09
  11   0   5   -6.32    5.69
 -11   0  -5   -3.55   11.00
  14  -3  -6   -0.76    5.08
 -14  -3   6   -5.25    3.73
 -14   3   6    0.68   10.05
 -14   3   6   -0.52    6.26
 -15  -1   7   58.77    7.86
  15  -1  -7   55.26    6.93
 -15  -1   7   63.34    6.23
 -15   1   7   71.75    6.28
 -15   1   7   56.29    9.70
  -2   7   4   -1.37    3.47
  -2  -7   4    5.07    3.92
   2  -7  -4   -2.26    8.20
  -2   7   4   -2.84   12.25
   2   7  -4    2.06    4.87
 -12   3   9   22.30   11.57
  12  -3  -9   18.62    7.36
  11  -1 -11   26.30    7.61
 -11   1  11   22.05   10.88
 -11  -1  11   31.41    8.34
  -4  -4  -8   75.47   10.17
  -4   4  -8   51.18    8.46
  -4   4  -8   60.06    8.56
  -4  -4  -8   64.11    9.49
  -4  -4  -8   79.85   11.66
   4  -4   8   54.74    7.61
   7  -1 -12   33.91    8.55
   7  -1 -12   35.15    8.16
   3   3 -11   81.05   11.10
   3   3 -11   79.55    9.27
   3   3 -11   79.26    8.74
   3  -3 -11   86.01   12.00
   3  -3 -11   75.80   11.17
  -5   6   7  285.88   22.85
  -5   6   7  292.17   28.22
   5   6  -7  281.47   23.54
   8   0 -12  102.71   12.23
   8   0 -12  119.95   12.02
   4   1 -12   57.63    8.86
   4  -1 -12   31.58    9.28
   4  -1 -12   37.94   10.00
   4   1 -12   56.80    9.89
  10  -5  -7    5.65    7.75
  10   5  -7    2.52    2.87
 -10   5   7    4.87    3.26
   4   5  -9  153.98   15.35
  -4   5   9  195.17   14.50
   4  -5  -9  179.70   17.48
   4  -5  -9  184.27   18.28
  -4  -5   9  162.81   14.75
   3   0 -12   81.93   10.61
   3   0 -12   72.35   11.52
 -14   0   9    6.77    7.46
 -13  -4   2   43.65    7.14
 -13  -4   2   46.25    5.52
 -13   4   2   39.41   11.91
 -13  -4   2   47.75    6.03
  13  -4  -2   30.65    6.61
 -13   4   2   36.44    8.67
   1  -7  -4    9.03    8.30
  -1  -7   4   14.30    4.30
  -1   7   4    7.82   12.83
   1   7  -4   10.22    4.89
  -1   7   4    2.83    3.55
  13  -3  -8  317.69   26.33
 -13   3   8  304.50   28.43
   9  -6  -4   11.78    6.70
  -9   6   4    7.52    4.07
  -9   6   4    0.42   11.54
   9   6  -4    5.54    3.79
  10  -2 -11   37.71    8.99
 -10   2  11   57.94   13.06
 -15   2   3  112.82   14.27
 -15  -2   3  120.00   10.42
 -15   2   3   78.61   13.08
 -15  -2   3  121.46   12.02
  15  -2  -3  120.93   11.03
  -9   6   1    5.20    5.03
  -9  -6   1   13.33    4.84
  -9   6   1   15.89   10.83
 -14   2   8   62.20   11.86
  14  -2  -8   86.80    9.14
  12  -2 -10   32.08    7.54
 -12   2  10   18.14   10.41
   2  -6   6   -2.64    4.57
  -2   6  -6   -4.27    7.39
  -2   6  -6    2.63    5.23
  -2  -6  -6   -1.21    4.75
  -2  -6  -6    1.45    7.95
  -2  -6  -6    1.66    8.52
   5  -5  -9  149.39   14.22
   5   5  -9   74.57    9.72
  -5   5   9   98.52    8.70
   5  -5  -9  178.52   12.90
 -13   0  10  150.21   14.78
  -3   7   4    2.48    3.67
   3  -7  -4    9.90    8.07
   3   7  -4    2.77    4.50
  -3  -7   4   12.92    3.77
   2   7   3    2.29   12.73
  -2   7  -3    2.36    9.32
   2   7   3   15.32    4.13
   2  -7   3   14.64    4.97
  -2  -7  -3   11.80    7.39
 -14   1  -1    6.48   10.34
 -14  -1  -1   10.38    8.64
  14   1   1    1.94    4.91
  14  -1   1    2.27    5.03
 -14  -1  -1    1.52    5.13
 -14   1  -1    3.03    6.97
  12   0   4   28.20    6.47
 -12   0  -4   35.49    6.95
 -10   0  -6  163.59   15.42
 -10   0  -6  136.57   18.00
  10   0   6  172.63   15.10
  -1  -1 -11   19.69    9.84
  -1  -1 -11   21.98   10.05
  -1   1 -11   33.92   10.33
  -1   1 -11   41.04    7.70
  -1  -1 -11   38.18    8.61
  -1   1 -11   24.59   10.24
   3  -5  -9   13.98    8.69
   3  -5  -9   13.53    9.67
  -3  -5   9    5.99    3.90
   3   5  -9    9.48    4.99
   5   7   0   32.21    4.60
  -5   7   0   30.23   10.92
  -5   7   0   22.01    5.28
   5  -7   0   21.71    6.12
  -5  -7   0   25.93    6.14
   1   6  -7    0.84    4.91
  -1  -6   7    0.95    4.00
   1  -6  -7   -2.48    8.01
   1  -6  -7    2.56    3.97
   1  -6  -7    9.74    9.02
 -13  -2  -2    7.49    5.50
 -13   2  -2   -1.17   10.82
  13   2   2    7.72    5.19
 -13   2  -2    6.82    7.49
  13  -2   2    1.13    5.24
 -13  -2  -2    9.90    8.79
   0   2 -11    4.90    6.56
   0   2 -11   14.96    8.63
   0  -2 -11   -2.37    8.13
   0  -2 -11    9.30    9.08
   0   2 -11   -2.17    9.66
  -4  -6  -5  214.27   18.93
  -4   6  -5  193.93   19.86
  -4   6  -5  217.57   18.21
   4  -6   5  209.21   17.97
  -4  -6  -5  188.02   19.09
  -4  -6  -5  211.02   17.84
  -5   2  -9   51.48    7.97
  -5   2  -9   52.69   11.54
  -5  -2  -9   38.77   10.02
   5  -2   9   47.70    7.39
  -5   7   3   23.74   12.13
  -5   7   3   29.14    4.63
   5   7  -3   19.65    4.43
   5  -7  -3   21.50    7.69
  -5  -7   3   17.41    3.72
  -2  -4  -9   24.29    7.00
   2  -4   9   10.28    5.35
  -2   4  -9   13.71    6.00
  -2   4  -9   13.10    6.37
   0  -7  -4    2.70    8.34
   0   7   4    5.99    3.65
   0   7  -4    3.15    4.54
   0  -7   4    7.27    4.29
  11  -5  -6   95.71   11.66
 -11   5   6   98.00    9.73
  11   5  -6  115.31    9.40
 -15   1   1    1.08    9.06
 -15   1   1   10.35    7.32
  15   1  -1   -1.71    4.57
 -15  -1   1    0.25    7.94
  15  -1  -1    8.02    4.84
 -15  -1   1    4.64    5.08
  11   1   5  146.46   13.46
 -11  -1  -5  125.47   16.68
 -11  -1  -5  151.43   13.91
  11  -1   5  142.00   13.32
 -11   1  -5  126.85   17.40
  -8  -5  -4    4.67    7.06
  -8  -5  -4   -4.34    6.94
  -8   5  -4    1.31    9.42
   8  -5   4   20.66    6.21
  -8  -5  -4    8.27    7.96
  -6   5   9   -3.25    2.31
   6  -5  -9   -7.15    9.56
   6   5  -9   11.41    4.13
  -6   5   9    7.52   14.15
  15  -2  -6    6.00    4.99
 -15   2   6   10.34    5.85
 -15   2   6   17.21    9.40
 -15  -2   6   14.36    4.14
   8  -1 -12  136.04   15.41
   8  -1 -12  155.04   14.91
   3  -2  10   -7.17    5.96
  -3   2 -10   -9.07    6.98
  -3   2 -10    8.01    9.68
  -3  -2 -10    4.77    8.24
  -3  -2 -10   -1.72   10.04
  -3  -2 -10   -8.18    8.77
   9  -5  -8  348.11   30.59
   9   5  -8  360.53   28.73
   3  -1 -12  124.08   13.94
   3   1 -12  131.76   13.13
   3   1 -12  115.29   13.90
   3  -1 -12  135.47   15.06
   8  -4 -10   75.12   11.68
   8   4 -10   80.05    7.52
  -8   4  10   56.16   15.73
 -14  -1   9   -6.81    5.64
 -14   1   9   -0.27    8.51
 -13  -3  -1   60.77    9.56
 -13  -3  -1   57.91    9.51
 -13   3  -1   55.43   10.76
  13  -3   1   51.66    7.56
 -13   3  -1   52.83   11.85
 -13  -3  -1   65.12    7.37
   8  -3 -11   34.15    8.50
   8  -3 -11   37.35    9.53
  -6   4  -7   93.12   11.14
  -6   4  -7   79.23   11.13
  -6  -4  -7  109.99   12.99
  -6  -4  -7  110.73   11.88
  -6  -4  -7  110.23   11.73
   6  -4   7   91.38    9.89
  -4   7   4    1.82    3.83
  -4   7   4    6.54   11.90
  -4  -7   4   -4.93    3.60
   4  -7  -4   -0.23    7.65
   4   7  -4   -5.67    4.52
  -9  -5  -3  518.00   38.72
  -9  -5  -3  536.46   38.61
   9  -5   3  424.96   38.16
  -9   5  -3  389.17   38.47
  -9   5  -3  456.18   40.14
  -9  -5  -3  560.15   39.04
  -4  -3  -9   24.71    8.39
  -4   3  -9   29.46    6.97
   4  -3   9   35.46    6.57
  -4   3  -9   29.26    8.94
  -6   6   7   86.70    7.42
   6  -6  -7   76.53   11.95
  -6   6   7   64.04   16.29
   6   6  -7   68.24    8.28
  -4   0 -10    2.16   10.43
  -4   0 -10    3.84    7.23
  -4   0 -10   -9.00   10.80
 -11   5   0   45.72   11.99
  11  -5   0   39.22    7.18
 -11   5   0   43.51    7.69
 -11  -5   0   57.14    6.77
 -11  -5   0   61.22    7.31
   2   5  -9   29.47    5.72
  -2  -5   9    9.99    4.29
   2  -5  -9    4.02    9.46
   2  -5  -9   12.71    8.67
 -13   1  10   12.36    8.78
 -13  -1  10   11.62    6.34
  13  -1 -10   11.48    6.21
   2   3 -11   15.02    8.64
   2   3 -11   23.42    6.44
   2  -3 -11   27.61    9.65
   2  -3 -11   22.78    8.82
   2   3 -11   11.44    5.80
  12  -1   4  113.51   10.89
  12   1   4   95.48   10.71
 -12   1  -4  114.11   11.79
 -12  -1  -4  111.79   11.32
  10   1   6  177.63   15.49
 -10  -1  -6  184.29   19.13
 -10   1  -6  130.33   19.04
  10  -1   6  165.57   15.51
 -10  -1  -6  189.37   16.13
 -13  -4   6   27.63    4.57
  13  -4  -6   26.88    6.73
 -13   4   6   19.24   11.43
 -13   4   6   24.94    6.81
  12  -4   1    0.35    5.67
 -12  -4  -1    2.22    5.51
 -12  -4  -1    5.27    6.73
 -12  -4  -1   13.23    7.20
 -12   4  -1    0.96    8.37
 -12   4  -1   -1.45   10.38
  -8   6   6    6.10   12.17
   8   6  -6    9.05    3.84
  -8   6   6    8.19    3.31
   8  -6  -6   16.54    8.30
   1   4 -10  311.37   26.01
   1  -4 -10  323.74   27.32
   1  -4 -10  346.04   27.88
  -1  -4  10  303.13   25.51
   1   4 -10  306.53   25.84
   9   0 -12  275.62   24.26
   9   0 -12  299.42   24.73
  -6   0  -9    0.30   10.42
   6   0   9  -16.23    6.68
  -6   0  -9  -17.40    7.83
  -7  -5  -5    1.60    8.34
  -7   5  -5   12.21    8.94
  -7  -5  -5   -3.45    7.47
  -7  -5  -5    5.79    6.68
   7  -5   5    1.16    5.36
  -7   5  -5   -0.22    6.23
 -15  -2   2   59.75    9.47
 -15   2   2   74.21   11.38
 -15  -2   2   70.36    7.22
  15  -2  -2   62.64    7.74
 -15   2   2   47.06   11.12
   2   0 -12   90.96   11.42
   2   0 -12  107.19   12.72
   4  -5   7    6.24    5.26
  -4   5  -7   22.26    7.32
  -4   5  -7   18.15    6.43
  -4  -5  -7   12.70    9.01
  -4  -5  -7    9.10    8.38
  -4  -5  -7   19.81    6.10
 -11   3  10  133.82   18.40
  11  -3 -10  169.37   16.01
 -14   3   1   69.42   12.61
  14  -3  -1   87.21    9.26
 -14   3   1   79.89   13.01
 -14  -3   1   81.94   10.36
 -14  -3   1   85.25    8.48
  13   0   3   -4.17    5.42
 -13   0  -3    5.15   10.90
 -13   0  -3   -2.60    6.33
   9   0   7  -10.91    6.30
  -9   0  -7    3.88   11.34
  -4   7  -2   25.53    5.76
  -4   7  -2   27.15   10.77
   4  -7   2   28.87    5.71
   4   7   2   27.80   11.87
  -4  -7  -2   33.87    7.57
 -15   0   8  247.18   21.52
  -9   6   5    4.74    3.74
   9   6  -5    6.32    3.71
   9  -6  -5    2.95    7.52
  -9   6   5   -1.73   11.83
   0  -6  -7    4.17    9.19
   0  -6  -7   -1.56    8.49
   0  -6   7    6.32    4.19
   0   6  -7    2.54    5.05
   0  -6  -7   -1.91    4.11
  -9   6   0    7.22    5.37
  -9  -6   0   14.81    5.60
  -9  -6   0   -3.46    5.17
  -9  -6   0   10.85    4.90
  -9   6   0   14.56   11.20
 -13  -4   1   -7.50    6.78
 -13   4   1    0.90    8.28
 -13  -4   1    2.77    4.71
  13  -4  -1    4.54    5.47
 -13  -4   1    0.94    5.78
  -6  -3  -8   56.81    9.00
  -6   3  -8   40.02    7.80
  -6   3  -8   32.19   10.05
   6  -3   8   40.84    6.72
  -6  -3  -8   49.69   11.05
  -6  -3  -8   39.25    9.51
   1  -7   4   24.26    5.15
  -1   7  -4   24.71    5.61
   1   7   4   27.22    4.51
  -1   7  -4   23.65    9.43
  -1  -7  -4   12.87    8.46
  -5   7  -1   85.42   13.48
   5  -7   1   85.76    9.67
  -5  -7  -1  111.50   10.33
  -5   7  -1   89.31    9.58
  -2  -5  -8    1.34    8.36
   2  -5   8   -2.83    4.96
  -2  -5  -8   -0.48    5.55
  -2   5  -8   -0.63    5.93
  -2   5  -8   -3.45    6.07
  -2  -5  -8   -6.68    9.44
 -14   3   7   63.33   11.95
 -14  -3   7   56.73    6.02
  14  -3  -7   58.39    7.77
  -6  -7   2   82.48    7.27
   6  -7  -2   69.23    9.28
   6   7  -2   66.26    7.44
  -6   7   2   74.16    7.72
  -6   7   2   74.68   13.98
   7  -5  -9   34.32    9.84
   7   5  -9   28.27    4.70
  -7  -2  -8  -10.04   10.01
  -7  -2  -8   -2.48    7.79
  -7   2  -8    8.60   11.26
  -7   2  -8    0.43    6.45
  -7  -2  -8  -10.92    9.27
  -4  -1 -10  207.10   20.85
  -4  -1 -10  225.25   19.45
   4  -1  10  220.93   18.48
  -4  -1 -10  197.10   20.69
  -4   1 -10  213.60   18.86
  -4   1 -10  172.68   21.01
 -10   5  -2   89.65   10.53
 -10  -5  -2   89.14   10.39
 -10  -5  -2   93.29   10.78
 -10   5  -2   89.48   13.53
 -10  -5  -2   91.39   10.12
 -12   0  11    2.56    8.23
  -6   7   1  176.71   20.87
  -6  -7   1  209.68   17.07
   6  -7  -1  180.96   17.80
  -6   7   1  192.83   17.18
   6   7  -1  218.25   16.98
   3   7   3  235.95   23.47
  -3   7  -3  207.77   21.69
   3  -7   3  223.79   19.22
  -3  -7  -3  249.96   20.60
 -10  -3  -5   50.95    8.12
 -10  -3  -5   42.41    9.89
  10  -3   5   43.05    7.11
 -10   3  -5   33.99    8.56
 -10  -3  -5   37.88   10.08
  -2  -3 -10   14.65   10.08
  -2  -3 -10   10.08    7.39
  -2   3 -10    9.71    6.64
  -2   3 -10    6.25    7.40
   2  -3  10    5.13    5.51
  -2  -3 -10   12.63    8.77
  12  -5  -3   32.08    6.59
 -12  -5   3   45.30    6.06
 -12   5   3   20.79    6.18
  -7  -6  -3  113.97   11.81
  -7   6  -3  112.99   15.16
   7  -6   3   99.44   10.94
  -7  -6  -3  125.67   11.69
  -7   6  -3   91.75   11.09
  -7  -6  -3  124.36   11.12
 -11  -3  -4  144.60   16.30
 -11   3  -4  167.27   15.99
  11  -3   4  163.47   14.50
 -11  -3  -4  175.19   15.12
 -11   3  -4  127.95   17.58
 -11  -3  -4  166.28   16.56
   6  -2 -12   77.86   11.29
   6  -2 -12   78.17   10.94
   5  -2 -12  135.73   14.33
   5  -2 -12  112.95   14.45
   5   7  -4    1.26    4.01
  -5   7   4   -0.42   12.32
  -5   7   4    4.29    4.18
   5  -7  -4    4.24    7.52
   9  -1 -12   23.47    8.42
   9  -1 -12   26.19    7.48
  12  -5  -4   -0.72    6.12
 -12  -5   4   13.17    4.68
 -12   5   4    2.47    5.06
  12  -4  -8   85.39   10.50
 -12   4   8   91.11   14.76
  -6  -1  -9    6.24   11.11
  -6  -1  -9   36.27    8.71
  -6  -1  -9   20.46   11.60
  -6   1  -9    1.80   11.64
  -6   1  -9   -1.38    6.90
  -1  -5   9   89.06    8.87
   1   5  -9   92.23    9.43
   2   1 -12   20.38    9.61
   2  -1 -12   39.92    9.98
   2   1 -12   22.58    7.92
   2  -1 -12   33.43    8.74
 -16   0   4   54.26    8.91
 -16   0   4   69.08    9.04
 -16   0   5    0.48    5.75
 -16   0   5   -8.57    7.23
 -13   1  -3    1.26   11.09
  13   1   3   21.40    5.85
 -13  -1  -3   21.20   10.67
 -13   1  -3   23.39    7.06
 -13  -1  -3   25.63    6.22
  13  -1   3   21.35    5.93
   9   1   7   33.29    6.73
  -9   1  -7   13.38   11.49
  -9   1  -7   37.82    7.43
  -9  -1  -7   33.40    7.61
  -9  -1  -7   37.16   11.02
   9  -1   7   17.38    6.60
 -15  -1   8   88.35    9.76
 -15   1   8   92.52   11.56
 -15  -1   8   93.88    7.94
  -2   0 -11   -6.48   10.04
  -2   0 -11    9.94   10.06
  -2   0 -11    4.70    7.70
  -6  -6  -4   73.77    9.91
  -6  -6  -4   49.24   10.16
   6  -6   4   63.50    8.84
  -6   6  -4   76.71   12.79
  -6  -6  -4   89.27    8.73
  -6   7   3  195.78   21.39
  -6   7   3  207.47   16.81
   6  -7  -3  196.50   18.11
   6   7  -3  194.83   16.81
  -7   6   7  382.53   36.48
  -7   6   7  426.12   32.12
   7   6  -7  384.29   32.57
   7  -6  -7  373.90   34.10
  -9   3  11   12.82   14.05
   9  -3 -11   13.82    8.78
   3  -6   6   -3.58    5.03
  -3  -6  -6    3.17    7.97
  -3  -6  -6   -6.74    5.30
  -3   6  -6   -8.50    7.97
  -3  -6  -6   -6.25    8.72
  -3   6  -6   -2.93    5.63
 -15  -2   7   -1.59    3.25
 -15   2   7   -2.44    8.92
  15  -2  -7   -4.39    5.15
 -11   2  11   12.76   11.31
  11  -2 -11    0.45    8.07
   7  -2 -12  107.52   12.59
   7  -2 -12   94.88   12.98
  -8  -6  -2   -5.82    5.63
  -8   6  -2   10.37    6.11
   8  -6   2   -8.47    6.12
  -8  -6  -2    1.54    6.05
  -8   6  -2   -0.37   10.42
  -8  -6  -2    0.57    6.25
   4   2 -12  103.64   12.70
   4  -2 -12   74.47   12.42
   4  -2 -12   92.40   13.00
   4   2 -12  125.43   11.62
  15   0   0    9.50    4.99
 -15   0   0   18.62    9.95
 -15   0   0    7.75    6.39
  -9   3  -6   12.74    7.02
  -9   3  -6   -1.44   10.51
  -9  -3  -6   12.07    9.41
  -9  -3  -6   25.59    7.63
  -9  -3  -6   18.85    9.40
  -9   4  10  141.61   19.31
   9  -4 -10  140.92   15.25
 -10  -4  -4   -0.42    6.72
 -10   4  -4    2.71    8.44
 -10   4  -4   11.24    8.58
 -10  -4  -4  -11.17    8.14
 -10  -4  -4    4.68    8.03
 -12   5   2   59.64    8.90
  12  -5  -2   72.34    8.87
 -12   5   2   47.46   13.40
 -12  -5   2   90.93    8.58
   1  -3 -11   -7.63   10.00
   1  -3 -11    5.03    8.61
   1   3 -11    5.20    6.20
   1   3 -11    0.60    6.31
  -6  -5  -6  101.92   11.26
  -6   5  -6   94.01   11.09
   6  -5   6   91.23   10.26
  -6  -5  -6  116.34   12.77
  -6  -5  -6  135.83   12.35
  -6   5  -6   85.43   11.96
 -11   4   9   40.18   13.51
  11  -4  -9   26.48    8.75
  -9  -4  -5   16.84    8.81
  -9  -4  -5    8.18    8.58
  -9   4  -5   15.39    8.11
  -9  -4  -5   20.76    7.50
  12  -1 -11   47.01    8.76
 -12   1  11   38.03   10.94
 -12  -1  11   59.34    8.65
  -6   7   0   -1.48   10.53
   6   7   0   -2.99    4.07
   6  -7   0    2.51    5.73
  -6   7   0   -2.88    5.23
  -6  -7   0    2.13    5.75
   2   7  -5  155.19   14.39
  -2  -7   5  162.74   13.72
   2  -7  -5  140.28   16.51
  -2   7   5  159.18   20.02
  -2   7   5  167.04   13.64
  14   2   1   12.96    5.16
 -14   2  -1   -1.13    8.07
 -14   2  -1   -2.05   11.23
 -14  -2  -1   22.51    8.88
 -14  -2  -1   18.74    5.62
  14  -2   1    7.79    5.50
  -1   2 -11    2.35    6.57
  -1  -2 -11   -5.60    8.02
  -1  -2 -11    0.81    8.15
  -1  -2 -11    4.97    9.49
  -1   2 -11    6.40    9.45
   3  -7  -5  131.06   15.19
  -3  -7   5  109.86   11.96
   3   7  -5  172.57   13.35
  -3   7   5  149.22   18.97
  -3   7   5  155.03   12.19
  16   0  -3    1.56    4.65
 -16   0   3   -6.73    7.54
 -16   0   3  -11.49    6.44
 -10   6   3  204.35   18.97
 -10   6   3  184.71   22.58
  10  -6  -3  194.05   19.43
 -10  -6   3  264.17   18.97
 -12   3  -3   46.20   12.18
 -12  -3  -3   54.30    7.82
  12  -3   3   50.03    7.49
 -12  -3  -3   35.01    9.59
 -12  -5   5  275.60   20.44
 -12   5   5  206.04   20.43
  12  -5  -5  239.04   21.15
 -16   0   6   -3.41    5.03
 -16   0   6    1.77    6.84
   0  -4 -10   11.81    9.74
   0   4 -10   -1.38    5.80
   0   4 -10    3.97    6.02
   0  -4  10    5.96    4.98
   0  -4 -10    8.10    8.73
 -16   1   4  276.81   28.33
 -16  -1   4  348.88   27.76
  16  -1  -4  356.89   27.65
 -16   1   4  377.65   29.37
 -16  -1   4  326.65   28.17
 -16   1   5   -2.83    6.45
 -16  -1   5    1.25    5.56
 -16   1   5  -11.61    8.52
  16  -1  -5   -2.00    4.93
 -16  -1   5   -5.99    5.21
   1   0 -12  283.77   24.57
   1   0 -12  273.85   25.39
  -1   7   5  113.34   11.33
   1   7  -5  119.33   12.12
   1  -7  -5   86.96   14.19
  -1   7   5  103.15   18.10
 -10   6   2   79.69   14.89
  10  -6  -2   83.49    9.95
 -10  -6   2   99.14    8.83
 -10   6   2   68.21    9.07
  -2   7  -4    6.31    4.97
  -2   7  -4    7.07    9.13
   2   7   4    2.11   12.84
  -2  -7  -4    2.26    8.00
   2  -7   4   -0.54    4.88
  -2   1 -11   17.03   11.25
  -2   1 -11   22.08   10.91
  -2  -1 -11   36.13   10.47
  -2  -1 -11   28.16   10.97
  -2  -1 -11   46.94    9.12
  -2   1 -11   32.30    8.04
 -11   5   7   26.27   12.74
  11   5  -7   19.91    3.54
  11  -5  -7   17.95    7.97
  -1   6  -7   81.69   10.33
   1  -6   7   82.22    8.82
  -1  -6  -7  113.94   12.91
  -1  -6  -7   92.22    8.89
  -1   6  -7   83.61    9.67
  -1  -6  -7  104.98   12.08
  13   4  -7   47.39    5.03
 -13   4   7   47.68   12.95
  13  -4  -7   40.26    7.76
   8  -5  -9    0.58    9.43
   8   5  -9    8.98    3.78
 -11   4  -3   -9.51    9.02
 -11  -4  -3    3.73    6.16
 -11   4  -3   -2.70    9.47
 -11  -4  -3    5.33    8.01
 -11  -4  -3    3.11    8.00
  11  -4   3    8.95    5.82
 -15  -2   1    9.81    4.66
 -15   2   1   13.90    9.95
 -15  -2   1    7.92    7.71
 -15   2   1   -0.93    8.81
  15  -2  -1    9.97    5.51
 -14   0  -2   15.85    6.36
  14   0   2    1.41    5.28
 -14   0  -2    4.80   10.81
 -11  -2  -5   82.57   13.57
 -11  -2  -5  109.67   11.61
  11   2   5  106.94   10.65
  11  -2   5  111.43   10.95
  -8   0  -8  836.89   80.66
  -8   0  -8 1063.43   79.89
   8   0   8 1034.27   79.55
   8  -2 -12    0.71    8.06
   8  -2 -12    8.11    8.70
  -4   7   5   36.32    5.02
  -4   7   5   24.85   13.53
   4   7  -5   34.99    6.21
   4  -7  -5   33.40    9.83
  10   5  -8  141.91   12.07
 -10   5   8  146.24   18.44
  10  -5  -8  139.11   14.90
  -5  -6  -5   92.86    9.15
  -5   6  -5   75.45    9.58
  -5  -6  -5   81.46   10.33
  -5   6  -5   76.56   12.09
   5  -6   5   73.66    9.06
  -5  -6  -5   77.29   10.94
 -15   1   0   39.52    8.36
 -15  -1   0   19.09    9.31
 -15  -1   0   37.84    6.44
  15   1   0   44.57    5.88
  15  -1   0   26.61    6.14
 -15   1   0   38.94   11.27
   3   2 -12  110.82   12.16
   3  -2 -12  113.05   13.83
   3   2 -12  105.17   13.53
   3  -2 -12  124.72   13.34
  14  -2  -9   18.51    6.56
 -14   2   9    8.14   10.18
 -10   6   4    6.87   12.42
  10  -6  -4   18.04    7.05
  10   6  -4   10.83    3.71
 -10   6   4    7.30    4.38
  -5   4  -8    4.46    7.32
  -5   4  -8   16.43    6.66
   5  -4   8   12.36    5.90
  -5  -4  -8   17.87    8.45
  -5  -4  -8   12.62    9.57
  -5  -4  -8   10.36    7.60
  -3  -4  -9   42.28    7.84
  -3  -4  -9   49.88    9.19
  -3  -4  -9   32.55   10.51
  -3   4  -9   20.98    7.46
   3  -4   9   26.68    6.02
  -3   4  -9   28.03    7.00
  -8   4  -6   52.40   10.33
  -8   4  -6   58.78   10.05
  -8  -4  -6   79.86   10.58
  -8  -4  -6   87.71   11.34
   8  -4   6   64.66    8.37
  -8  -4  -6   83.49   10.17
  11  -5   1    4.29    6.03
 -11  -5  -1   -0.19    6.62
 -11  -5  -1    5.59    5.80
 -11   5  -1   -0.68    6.47
 -11   5  -1    8.23   10.84
 -13   2  10   62.18   12.51
  13  -2 -10   71.00    9.46
  13  -3  -9  219.34   19.54
 -13   3   9  214.40   21.95
 -12  -2  -4   42.94   11.48
  12  -2   4   63.06    7.95
 -12  -2  -4   65.74    8.43
 -12   2  -4   72.36   13.49
  12   2   4   53.46    7.77
  10  -2   6   96.44    9.95
 -10  -2  -6   79.31   12.75
 -10   2  -6   55.38   14.13
 -10  -2  -6  103.14   11.03
 -10   2  -6   87.11   10.61
 -10  -2  -6   92.29   13.31
   9  -6  -6   26.40    8.60
   9   6  -6   33.06    4.77
  -9   6   6   25.73   13.47
  -9   6   6   31.90    4.65
  -6   7   4   67.78    6.63
   6  -7  -4   59.51    9.50
   6   7  -4   50.67    6.51
  -6   7   4   67.08   14.06
  16  -1  -3    8.63    5.16
 -16   1   3  -10.23    8.93
 -16   1   3   13.63    8.15
 -16  -1   3   12.26    5.29
 -16  -1   3    3.16    7.10
   9  -6   1  104.97   11.72
  -9  -6  -1  126.48   11.80
  -9  -6  -1  126.47   11.62
  -9   6  -1  105.12   15.98
  -9  -6  -1  140.42   11.63
  -9   6  -1   99.63   11.94
   0   5  -9   -1.19    5.95
   0  -5  -9    7.40    4.94
   0   5  -9    0.16    5.61
   0  -5   9    8.63    4.83
  -5   7  -2   27.83   11.17
  -5  -7  -2   38.16    5.68
  -5  -7  -2   26.47    7.49
   5  -7   2   17.40    6.10
  -5   7  -2   17.74    5.92
  16  -1  -6  168.95   13.63
 -16   1   6  122.66   13.66
 -16  -1   6  154.22   13.51
 -16   1   6  182.26   16.01
 -16  -1   6  155.27   14.05
 -14  -3   0   27.80    5.75
 -14   3   0   15.44   10.35
  14  -3   0   22.87    6.44
 -14  -3   0   29.99    8.59
 -14   3   0   19.43   10.73
  10  -1 -12    3.65    7.88
  15  -3  -4   55.61    7.13
 -15  -3   4   47.87    7.29
 -15   3   4   63.88   12.11
 -15   3   4   38.79    9.71
 -13  -4   0    0.72    5.39
 -13   4   0    8.13    9.12
 -13  -4   0   10.92    6.63
 -13  -4   0    7.07    7.49
  13  -4   0    4.18    5.81
   0  -7   5  152.71   12.01
   0  -7  -5  102.59   14.54
   0   7  -5  139.65   12.32
   0   7   5  124.84   18.64
   0   7   5  119.00   11.40
  -8  -3  -7   13.41   10.28
  -8   3  -7    3.79    7.13
  -8   3  -7    7.23   10.64
  -8  -3  -7    7.17    7.98
  -8  -3  -7    3.03    9.01
   1   1 -12   43.54    8.62
   1  -1 -12   35.97    9.30
   1  -1 -12   43.15   10.63
   1   1 -12   51.84   10.80
 -12   5   1  287.05   29.14
  12  -5  -1  330.03   26.23
 -12  -5   1  337.93   26.16
 -12   5   1  266.34   26.27
   4   6  -8   47.26    6.51
  -4   6   8   36.28    4.43
  -4   6   8   41.51   16.09
  -4   7  -3   91.16   13.91
   4   7   3  101.22   15.74
  -4  -7  -3   99.99    9.71
  -4  -7  -3  108.48   11.68
   4  -7   3   93.97    9.99
 -10   6   1   86.38    9.64
 -10   6   1   89.94   14.94
  15  -3  -5   57.21    7.31
 -15   3   5   51.41   11.72
 -15  -3   5   54.19    6.86
 -15   3   5   53.65    9.13
 -14   0  10   36.69    8.49
   3   6  -8   93.20   10.26
  -3   6   8  119.82    9.28
  -3  -6   8   95.19    9.48
 -14   1  -2   -3.78    7.01
 -14  -1  -2    4.93    5.58
  14   1   2    2.92    5.44
  14  -1   2   -0.98    5.40
 -14   1  -2   14.31   11.17
 -14  -1  -2   -2.70    9.79
   8  -1   8   42.04    7.43
  -8   1  -8   38.18    7.97
  -8   1  -8   40.08   12.47
  -8  -1  -8   36.23   11.74
   7  -7  -2   -5.69    6.78
  -7   7   2   11.80    4.66
  -7   7   2   22.65   12.11
   7   7  -2    5.90    4.13
 -14   4   4   15.64   11.44
  14  -4  -4   -0.99    5.64
 -14  -4   4   -1.34    4.88
 -14   4   4    5.27    8.14
   8   6  -7   83.47    8.33
  -8   6   7   63.96   15.22
  -8   6   7   86.65    7.78
   8  -6  -7   85.76   11.85
 -16   0   2   75.13    9.37
 -16   0   2   60.78   10.20
  16   0  -2   67.30    7.75
   6  -7   1  316.44   29.65
  -6  -7  -1  405.69   30.01
  -6   7  -1  285.55   32.02
  -6  -7  -1  411.78   29.56
  -6   7  -1  335.11   29.70
   5  -7  -5    2.30    8.35
  -5   7   5    7.52   12.95
   5   7  -5   12.50    4.73
  -5   7   5    7.09    4.14
 -10   3  11   -6.34   13.07
  10  -3 -11    5.21    8.52
  15  -3  -3    3.52    5.63
 -15  -3   3   22.21    6.52
 -15   3   3   14.94   10.30
 -15   3   3   24.00    9.79
  14  -3  -8   40.27    7.57
 -14   3   8   48.32   11.98
   5   6  -8   28.74    5.31
  -5   6   8   18.11   15.72
  -5   6   8   21.85    3.64
 -12   3  10   70.30   13.14
  12  -3 -10   54.04    9.39
  -4  -2 -10    6.56    8.23
  -4  -2 -10    4.94    8.84
  -4  -2 -10    8.67   10.56
   4  -2  10   15.89    6.10
  -4   2 -10    0.68    6.97
  -4   2 -10    6.18   10.36
  -3  -5  -8   80.16    9.05
  -3  -5  -8   70.88   10.72
  -3   5  -8   75.44    9.19
   3  -5   8   57.93    8.00
  -3  -5  -8   80.05   11.63
  -3   5  -8   64.19    9.05
 -16   0   7    9.54    6.98
  12  -5  -6   19.52    7.20
 -12   5   6   12.80   12.41
  12   5  -6   21.26    3.63
 -12   5   6   13.28    4.66
   7  -7  -1  131.19   13.74
  -7  -7   1  154.18   12.91
  -7   7   1  118.78   17.46
  -7   7   1  131.38   13.11
   7   7  -1  161.13   12.85
 -14  -4   3   63.14    8.23
 -14   4   3   57.72   10.70
  14  -4  -3   72.99    8.28
 -14   4   3   58.71   13.19
 -15   0   9    0.21    6.90
 -13  -3  -2   -0.72    5.78
 -13   3  -2    3.98   11.29
 -13  -3  -2    0.27    7.90
 -13  -3  -2    1.35    8.22
  13  -3   2   -2.96    5.77
  -2  -6   8   25.53    4.77
   2   6  -8   34.47    6.13
   2  -6  -8   23.72    9.10
   2  -6  -8   17.54   10.08
  -7   7   3   90.54   15.36
  -7   7   3   88.80    8.93
   7  -7  -3   93.15   10.82
   7   7  -3   95.91    9.03
   0  -3 -11   17.11   10.23
   0   3 -11   11.04    7.39
   0   3 -11   11.06    6.35
   0  -3 -11   13.05    9.00
   0  -3  11   21.42    5.63
   9  -2 -12    0.44    7.46
   9  -2 -12  -11.08    8.66
 -12  -4  -2    8.76    6.30
 -12  -4  -2    6.78    7.81
  12  -4   2   10.65    6.05
 -12   4  -2   14.74    9.61
 -12   4  -2   -2.50   10.18
 -10   6   5   -4.87   12.82
  10   6  -5    6.06    3.72
 -10   6   5    5.93    4.21
  10  -6  -5    1.52    7.20
 -14   4   5    8.40   10.69
  14  -4  -5    1.19    5.53
 -14   4   5   -4.32    7.66
 -14  -4   5    1.99    4.13
  -6   2  -9    3.77   11.14
   6  -2   9    7.04    6.36
  -6   2  -9   -0.44    6.90
  -6  -2  -9    1.12    8.74
  10  -4 -10  212.40   20.44
 -10   4  10  222.96   23.64
  -5   3  -9   52.71   11.34
  -5  -3  -9   68.90   10.51
   5  -3   9   63.52    8.30
  -5   3  -9   64.89    8.83
  -5   5  -7    7.69    6.76
  -5  -5  -7   24.15    8.81
   5  -5   7   -2.13    5.61
  -5   5  -7    9.05    7.76
  -5  -5  -7   11.06    9.62
  -5  -5  -7    8.89    6.67
   2   2 -12   28.34    7.33
   2  -2 -12   26.82   10.17
   2  -2 -12   29.05    9.15
   2   2 -12   22.51    9.39
 -13   2  -3   47.72   13.40
 -13   2  -3   55.92    9.50
  13  -2   3   57.12    7.70
  13   2   3   58.51    7.46
 -13  -2  -3   55.83    8.07
  -9   2  -7   24.73   12.67
  -9  -2  -7   12.93   10.01
  -9  -2  -7    9.31    7.81
  -9  -2  -7    8.99   11.01
  -9   2  -7   34.54    8.09
   9  -2   7   36.35    7.43
  15  -2  -8   21.12    5.74
 -15   2   8    6.64    9.45
 -14   1  10  148.84   15.70
   5  -4 -11    0.57    8.91
   5  -4 -11    8.75   10.19
   5   4 -11   -3.50    4.88
  -5   0 -10  306.02   24.70
  -5   0 -10  237.50   26.10
  -5   0 -10  294.43   26.74
 -15   3   6   48.17   11.36
  15  -3  -6   45.84    7.36
 -15  -3   6   63.40    6.45
   3  -7   4   37.11    6.35
  -3   7  -4   49.92    7.05
  -3   7  -4   55.63   11.27
  -3  -7  -4   48.82    6.42
  -3  -7  -4   20.03    9.16
  -3  -3 -10   45.69    9.59
   3  -3  10   33.04    6.72
  -3   3 -10   32.68    7.32
  -3   3 -10   30.30    9.37
  -3  -3 -10   19.71    8.61
  -3  -3 -10   49.03   10.92
  -1  -7  -5    7.71    8.53
   1  -7   5    3.46    4.79
   1   7   5    8.48    3.81
  -1   7  -5    2.15    5.18
   1   7   5   11.47   14.41
   6  -4 -11   63.81   11.74
   6  -4 -11   61.19   11.02
 -13   0  11   -1.47    8.33
   6  -6  -8    4.83    9.53
  -6   6   8   -0.09    3.07
  -6   6   8   -7.14   14.90
   6   6  -8   -5.08    4.62
   9   5  -9  115.51   10.16
  -9   5   9   98.38   17.06
   9  -5  -9   90.17   13.56
 -16   1   2  370.82   32.13
 -16   1   2  397.17   31.90
 -16  -1   2  377.53   30.61
  16  -1  -2  383.36   30.53
 -16  -1   2  343.59   31.44
   7  -4   7   58.47    8.25
  -7  -4  -7   74.59   11.28
  -7  -4  -7   65.94   10.19
  -7   4  -7   43.81   10.47
  -7   4  -7   60.06    9.53
  -7  -4  -7   95.59   10.30
 -11   0  12    8.49   10.02
  -4   6  -6   16.14    6.71
  -4  -6  -6   13.34    8.52
  -4  -6  -6   11.95    7.99
  -4   6  -6    8.91    8.70
  -4  -6  -6   18.97    5.81
   4  -6   6   20.75    5.69
   4   4 -11   11.77    5.51
   4  -4 -11    2.53    9.08
   4  -4 -11    6.67    9.47
   1  -4  10    7.04    5.44
  -1   4 -10    3.83    6.10
  -1  -4 -10    9.49    9.31
  -1   4 -10    4.05    6.51
  -1  -4 -10    8.95    6.63
  -1  -4 -10   19.35   10.48
  -2  -6  -7    3.23    5.17
  -2   6  -7   -0.22    6.83
   2  -6   7   -6.70    4.97
  -2   6  -7   -8.86    5.97
  -2  -6  -7    0.79    8.43
  -2  -6  -7    5.56    9.16
  -9  -5  -4   27.03    7.64
  -9   5  -4   27.19    7.82
  -9   5  -4   24.02   10.14
  -9  -5  -4   12.66    8.62
  -9  -5  -4   30.43    8.00
   9  -5   4   22.83    6.52
 -16  -1   7   15.01    3.89
 -16   1   7   17.89    8.75
 -12   2  11    2.20   11.42
  12  -2 -11   12.13    7.91
   0   0 -12  687.08   55.29
   0   0 -12  678.23   55.99
 -15   1   9   35.79    9.88
   1   6  -8  100.81   10.87
   1  -6  -8  108.24   12.89
  -1  -6   8  103.66    9.92
   1  -6  -8  108.31    9.85
   1  -6  -8  123.05   14.03
 -14   4   2    3.37    9.03
  14  -4  -2    5.22    5.77
 -14  -4   2   -0.38    6.25
 -14   4   2    0.77   10.73
 -15   3   2   -8.21   10.02
  15  -3  -2    0.66    5.45
 -15  -3   2   -5.55    6.80
 -15   3   2   -6.23   10.49
 -15  -3   2    2.52    4.29
 -16   2   4  -13.22    8.58
 -16   2   4    8.49    9.48
 -16  -2   4   -5.02    6.15
  16  -2  -4    5.45    5.23
  -7  -7   0   -6.73    4.89
  -7   7   0    5.39   11.16
  -7   7   0   -2.19    5.34
  -7  -7   0   -1.20    5.69
   7  -7   0   -0.86    5.89
   8  -5   5  163.13   15.58
  -8  -5  -5  129.71   17.57
  -8  -5  -5  193.53   16.53
  -8  -5  -5  201.21   16.98
  -8   5  -5  182.46   18.00
 -16  -2   5  120.61   11.15
 -16   2   5   74.03   14.30
  16  -2  -5  128.20   11.25
 -16   2   5  101.72   12.34
  -3   0 -11   -0.72   10.76
  -3   0 -11    9.65   11.05
  -3   0 -11   -8.78    8.20
 -10  -5  -3   54.05    8.77
 -10   5  -3   60.49    9.13
 -10  -5  -3   62.57    8.62
 -10  -5  -3   32.11    9.50
 -10   5  -3   60.61   12.04
  -2  -2 -11    1.72    9.94
  -2  -2 -11   -0.28    8.82
  -2  -2 -11    2.59    8.32
  -2   2 -11    6.65    7.08
   2  -2  11    4.61    5.91
  -2   2 -11    1.27   10.26
 -10  -6   0   11.13    5.89
 -10   6   0    3.71   11.79
 -10  -6   0   12.00    5.31
 -10   6   0   18.70    6.27
   7   7  -4  134.57   12.48
  -7   7   4  152.49   12.56
  -7   7   4  138.74   18.14
   7  -7  -4  143.62   14.48
   6   7  -5  213.28   18.31
  -6   7   5  225.68   18.08
  -6   7   5  219.62   23.39
   6  -7  -5  201.79   20.02
   7  -4 -11   14.21   10.04
   7  -4 -11   11.20    8.37
  -1   5  -9   37.96    7.22
  -1   5  -9   39.19    6.91
   1  -5   9   36.36    6.05
  -1  -5  -9   28.04   10.23
  -1  -5  -9   38.08    6.58
  -1  -5  -9   29.35    9.74
  -5  -1 -10   21.85   11.38
  -5  -1 -10   15.88   10.94
  -5  -1 -10   22.55    8.58
  -5   1 -10   16.35   11.75
   5  -1  10   19.87    6.75
  -5   1 -10   14.75    7.57
  14  -4  -6   26.26    6.72
 -14  -4   6   34.46    4.87
 -14   4   6   27.00   11.80
  12  -4  -9    0.47    7.89
 -12   4   9    5.90   12.76
   3   4 -11   13.61    5.87
   3  -4 -11    2.85    9.31
   3  -4 -11    2.82    9.77
 -15   0  -1    9.35    6.10
  15   0   1    5.11    5.28
 -15   0  -1   12.33   10.87
 -15   2   0   13.55    8.83
  15  -2   0    2.15    5.69
 -15  -2   0   -2.33    5.10
 -15  -2   0    1.81    8.63
  12   0   5   -2.91    5.96
 -12   0  -5   -1.29    6.87
 -12   0  -5   -6.25   12.08
  -8  -6  -3   -9.75    7.15
  -8   6  -3   -6.38   10.76
  -8   6  -3    0.68    6.24
   8  -6   3    1.95    5.91
  -8  -6  -3    1.60    6.69
  -8  -6  -3    2.03    5.92
   7   0   9   30.26    7.26
  -7   0  -9   24.46   12.40
  -7   0  -9    7.80    8.10
  -7  -6  -4   85.80    8.68
  -7  -6  -4   30.19    9.96
  -7  -6  -4   57.16    9.41
   7  -6   4   67.47    8.64
  -7   6  -4   59.84   12.27
 -13   1  11   32.69   10.37
  13  -4  -8    3.60    7.03
 -13   4   8   12.01   12.29
   5  -5 -10   10.49    9.92
   5   5 -10    0.63    4.94
 -11   1  12    1.48   11.58
 -11  -1  12    4.34    8.74
  11  -1 -12    7.50    7.57
 -12  -5   0    0.97    6.05
 -12   5   0   -8.46   11.61
 -12   5   0  -12.32    7.28
 -12  -5   0    5.69    6.15
  12  -5   0   -7.11    6.20
 -12  -5   0   -0.56    5.55
   7  -3   8  110.13   11.25
  -7  -3  -8  131.78   12.80
  -7   3  -8  113.05   11.93
  -7   3  -8   90.25   14.17
  -7  -3  -8  120.74   14.70
  -7  -3  -8   78.03   13.08
   4  -5 -10   37.63   10.36
   4   5 -10   42.89    6.29
  -4  -5  10   34.38    5.10
   4  -5 -10   38.34   11.12
 -11   0  -6   75.34    9.31
 -11   0  -6   51.19   13.20
  11   0   6   62.62    8.70
   0  -1 -12   30.46    8.90
   0   1 -12   18.59   10.69
   0  -1 -12   26.25   10.30
   0   1 -12   21.71    7.92
   0   1 -12   23.33    9.88
  -3   7   6   27.68   14.60
  -3   7   6   27.42    4.45
   3  -7  -6   28.01    9.66
   3   7  -6   24.99    5.74
  16  -2  -3  -11.56    5.92
 -16  -2   3   -5.93    4.31
 -16  -2   3    0.63    6.77
 -16   2   3   -8.08    9.21
 -16   2   3    0.65    9.70
   6  -3 -12  163.71   18.38
   6  -3 -12  187.56   17.87
   5  -3 -12   80.61   12.09
   5  -3 -12   63.28   11.34
  -2  -7   6   76.88    6.77
  -2   7   6   33.05   15.76
  -2   7   6   62.58    6.45
   2   7  -6   50.93    7.51
   2  -7  -6   53.86   11.25
 -16   2   6   16.31    9.90
 -16  -2   6   11.87    4.52
  16  -2  -6   11.53    5.29
  11   5  -8   81.08    7.48
  11  -5  -8   75.67   11.20
 -11   5   8   82.57   15.86
 -10   2  12   79.76   15.62
  10  -2 -12   97.67   12.13
  -7   6   8  124.68   10.28
   7  -6  -8  102.66   14.29
  -7   6   8  108.28   18.35
   7   6  -8  113.58   11.15
   6   5 -10   87.56    8.95
   6  -5 -10   92.49   13.11
 -16   0   1   -2.30    6.43
  16   0  -1   -5.18    5.05
 -16   0   1   -3.60    8.98
  -3   1 -11   52.68   12.70
  -3   1 -11   41.22   12.09
  -3  -1 -11   58.70    9.50
  -3  -1 -11   57.95   11.97
  -3  -1 -11   40.87   11.44
  -3   1 -11   40.06    8.87
   6   0 -13    8.19    8.38
   6   0 -13    3.58    7.77
   1   2 -12   34.06   10.45
   1   2 -12   34.76    8.05
   1  -2 -12   26.85   10.63
   1  -2 -12   30.75    9.48
   1   2 -12   36.17    9.95
   4  -7  -6   12.33    9.29
  -4   7   6   19.85    4.00
   4   7  -6   19.41    5.58
  -4   7   6   27.14   13.80
 -13   0  -4  298.83   24.24
  13   0   4  272.46   23.83
   3   5 -10   17.99    5.45
   3  -5 -10   19.24   10.65
  -3  -5  10   16.01    4.51
   3  -5 -10   15.30    9.39
  -9   6   7   -5.59   13.57
  -9   6   7    0.10    3.30
   9  -6  -7    8.96    8.39
   9   6  -7    6.15    3.68
   6  -7   2   39.10    7.25
  -6  -7  -2   52.05    6.84
  -6  -7  -2   52.43    8.49
  -6   7  -2   45.49   12.15
  -6   7  -2   48.23    7.30
  -5   7  -3   30.12    6.79
  -5   7  -3   31.83   11.17
  -5  -7  -3   33.59    7.46
  -5  -7  -3   39.42    5.92
   5  -7   3   35.61    6.34
  -5  -7  -3    3.94    8.03
 -16   0   8   71.34   10.13
 -10   6   6   59.49   14.39
 -10   6   6   43.77    5.68
  10  -6  -6   52.84    9.21
  10   6  -6   47.41    5.63
  -9   6  -2   34.53    7.76
  -9  -6  -2   45.67    7.49
  -9  -6  -2   50.20    7.34
   9  -6   2   38.36    7.47
  -9   6  -2   32.92   12.18
  -9  -6  -2   46.78    7.93
 -14  -2  -2   68.72    8.32
 -14   2  -2   61.20   10.17
 -14   2  -2   71.66   13.81
  14   2   2   69.28    8.13
 -14  -2  -2   62.12   11.73
  14  -2   2   63.57    8.32
   5   0 -13   -1.91    8.60
   5   0 -13    2.87    7.80
  -7   5  -6   23.07    7.97
  -7  -5  -6   22.92    8.45
   7  -5   6   27.89    6.58
  -7   5  -6   26.62    9.05
  -7  -5  -6   21.55    7.50
  -7  -5  -6   17.41    9.17
 -15  -3   7    1.99    3.45
  15  -3  -7   -2.11    5.58
 -15   3   7    1.07    9.74
   7   0 -13    5.32    7.87
   7   0 -13   -3.97    7.46
  -8   2  -8  265.05   29.61
  -8  -2  -8  345.16   29.64
  -8  -2  -8  393.88   28.14
  -8  -2  -8  279.08   28.71
  -8   2  -8  321.16   27.46
  11  -3 -11   20.90    8.78
 -11   3  11   13.49   12.71
   7  -3 -12   77.12   11.80
   7  -3 -12   82.97   12.67
   4  -3 -12    9.41    9.33
   4  -3 -12    8.01    9.87
 -15   1  -1   -6.31    7.29
  15  -1   1    1.96    5.41
 -15   1  -1   -0.96   11.17
  15   1   1   -3.44    5.30
 -15  -1  -1   -4.52    5.62
 -15  -1  -1   -3.19    9.56
  12  -1   5  108.34   11.77
 -12   1  -5  124.82   12.61
  12   1   5  122.92   11.91
 -12  -1  -5  118.40   12.37
 -12  -1  -5  121.03   15.66
  12   5  -7   28.02    4.01
  12  -5  -7   24.09    7.71
 -12   5   7   32.76   13.27
 -13   5   4   38.63    8.26
  13  -5  -4   51.25    8.40
 -13   5   4   37.14   13.32
  -2   7  -5   -4.89    5.54
  -2   7  -5    2.87    9.40
  -2  -7  -5   -1.70    8.85
  -2  -7  -5   -1.38    4.73
   2  -7   5   -8.08    5.11
  -2  -7  -5    4.26    7.11
  -6  -6  -5   88.45   10.67
  -6  -6  -5   47.02   10.87
  -6   6  -5   68.40    9.86
   6  -6   5   75.65    9.06
  -6   6  -5   79.38   12.58
  -6  -6  -5   92.28    9.32
  -7   1  -9    3.40    7.33
  -7  -1  -9    6.73    7.85
  -7   1  -9    4.85   11.89
  -7  -1  -9   -0.78   11.10
  -7  -1  -9    5.89   11.14
 -13  -4  -1   53.72    9.19
 -13  -4  -1   62.44    7.86
 -13  -4  -1   65.96    9.24
 -13   4  -1   53.94   11.53
  13  -4   1   43.83    8.07
  -8   4  11   20.64   15.90
   8  -4 -11   40.30   10.26
 -11  -5  -2    8.09    6.55
 -11   5  -2   24.28    7.77
 -11  -5  -2    5.12    7.11
 -11   5  -2    6.25   10.91
  11  -5   2    4.21    6.35
 -11  -5  -2   11.38    6.98
 -13   5   3   16.10    6.60
 -13  -5   3   16.65    5.45
  13  -5  -3   16.77    6.42
   1  -7  -6   -4.11    9.33
   1   7  -6    7.88    5.29
  -1  -7   6   15.94    4.28
  -1   7   6    2.14    3.51
  -1   7   6    8.95   15.40
  -4  -4  -9   72.25   12.45
  -4  -4  -9   63.32    9.89
   4  -4   9   61.14    8.30
  -4  -4  -9   81.30   11.17
  -4   4  -9   70.62   10.03
  -4   4  -9   60.27    8.79
  11  -6  -3  128.38   13.76
 -11   6   3  119.47   13.07
 -11   6   3   94.97   17.55
 -11  -1  -6   -1.39   11.16
 -11   1  -6   12.86   11.93
 -11  -1  -6   15.14    7.52
  11   1   6    7.84    6.61
  11  -1   6   14.30    6.29
   0   6  -8    8.50    5.82
   0  -6  -8   10.37    4.51
   0  -6  -8   18.96   10.27
   0  -6   8    9.04    4.61
   0  -6  -8   15.38    9.22
 -10   0  -7    8.36   11.56
  10   0   7    3.33    6.30
 -14  -3  -1  116.33   13.01
 -14  -3  -1  117.41   11.17
  14  -3   1  121.85   11.30
 -14   3  -1   91.76   15.47
 -14   3  -1  111.45   14.51
 -14  -3  -1   69.13   12.71
  -2  -4  11  199.24   17.52
   2  -4 -11  218.18   20.05
   2  -4 -11  210.13   20.39
   2   4 -11  211.37   18.18
  -1  -3 -11   19.38   10.90
  -1   3 -11   22.80    8.61
  -1   3 -11   21.44    7.14
   1  -3  11   19.03    5.86
  -1  -3 -11   42.78    9.82
  -8   7   2   41.88    6.45
  -8   7   2   41.73   12.74
   8   7  -2   51.01    5.81
   8  -7  -2   35.66    7.82
 -11   6   4   78.13   15.58
  11  -6  -4  107.92   11.01
 -11   6   4   87.41    9.59
   7   5 -10   40.47    5.69
   7  -5 -10   36.09   11.20
  -8   7   3   39.12    5.92
   8   7  -3   42.66    5.65
  -8   7   3   35.30   13.16
   8  -7  -3   40.20    8.23
 -11   4  10   42.03   14.85
  11  -4 -10   27.68    9.24
   5   7  -6   17.48    5.41
   5  -7  -6   15.45    9.58
  -5   7   6    2.40   13.76
  -5   7   6   12.94    4.05
 -16   1   1   56.07   11.91
 -16  -1   1   64.12    7.57
 -16   1   1   54.79    9.13
 -16  -1   1   48.72   10.11
  16  -1  -1   51.56    7.18
 -14   4   1  122.12   15.91
  14  -4  -1  156.77   13.71
 -14   4   1  137.67   17.44
 -14  -4   1  142.65   14.20
 -11   6   2   12.66    5.99
 -11  -6   2    5.46    5.04
 -11   6   2   22.90   12.61
  11  -6  -2   31.95    6.80
   6  -1 -13   10.01    8.71
   6  -1 -13   20.44    8.56
   4   0 -13   -5.10    9.50
   4   0 -13    4.51    8.17
  -7   7  -1   11.37    6.07
  -7  -7  -1   12.62    5.20
  -7  -7  -1   15.11    6.66
  -7   7  -1   14.44   11.68
   7  -7   1   11.78    6.00
   8   0 -13    2.03    7.91
   8   0 -13    0.41    7.34
  -4  -7  -4   92.15    9.00
  -4   7  -4   84.61   13.27
  -4  -7  -4   48.76   11.41
  -4  -7  -4   91.06   10.54
   4  -7   4   95.73    9.58
 -13  -1  -4   95.66   10.29
  13   1   4   85.90    9.55
  13  -1   4   75.79    9.53
 -13   1  -4   84.91   10.30
 -13   1  -4   69.03   14.60
 -13   5   5  231.84   25.82
 -13   5   5  240.44   22.47
  13  -5  -5  263.31   22.86
 -13  -5   5  287.78   22.06
  -2  -5  10   80.78    8.34
   2   5 -10   71.86    9.29
   2  -5 -10   81.16   12.74
   2  -5 -10  104.47   12.31
 -14   2  10    5.79   10.49
  14  -2 -10   13.80    6.79
 -16   1   8    3.98    8.24
 -10   5   9  138.64   20.33
  10  -5  -9  154.57   17.12
  10   5  -9  172.84   14.16
 -15   3   1   37.19   11.12
  15  -3  -1   37.58    7.05
 -15   3   1   26.34   11.16
 -15  -3   1   34.31    8.31
 -15  -3   1   33.42    5.82
 -11  -3  -5   30.65    9.81
 -11  -3  -5   28.56    9.93
  11  -3   5   27.69    6.84
 -11  -3  -5   22.76    7.58
 -11   3  -5   32.03    8.38
  -6  -4  -8   -0.33    9.89
  -6   4  -8    4.34    8.33
  -6  -4  -8   -4.75    8.29
   6  -4   8    6.52    5.90
  -6  -4  -8    5.45    8.48
  -6   4  -8   -4.16    6.84
   5   1 -13   12.22    8.89
   5  -1 -13   17.03    9.46
   5   1 -13   16.92    7.70
   5  -1 -13    2.52    8.91
   7  -1 -13  100.09   12.32
   7  -1 -13  103.24   12.47
  -7   7   5   -2.06    3.96
   7  -7  -5    1.76    7.94
   7   7  -5    4.09    4.23
  -4  -5  -8  134.64   14.27
  -4   5  -8  115.18   13.01
  -4   5  -8  124.95   13.00
   4  -5   8  132.18   12.10
  -4  -5  -8  122.06   14.91
  -4  -5  -8  123.67   12.73
   8  -3 -12  107.17   12.72
   8  -3 -12  103.55   13.56
   0  -8   0   36.60    7.22
   0   8   0   46.26   12.83
   0   8   0   15.70    6.19
  -8   7   1   54.07    7.04
   8  -7  -1   45.16    7.81
  -8   7   1   18.11   12.47
   3  -3 -12  225.59   21.23
   3  -3 -12  227.54   21.71
  14  -3  -9    4.30    6.95
 -14   3   9    6.89   10.75
  13  -5  -2    4.74    6.00
 -13  -5   2    2.97    5.59
 -13   5   2   -5.46    7.11
  14  -4  -7   47.67    8.12
 -14   4   7   52.61   12.93
 -16   2   2   25.53   10.43
 -16   2   2   42.73   10.44
 -16  -2   2   38.76    8.44
 -16  -2   2   40.55    5.91
  16  -2  -2   42.47    7.06
  -3   6  -7   55.82    8.46
  -3  -6  -7   69.92   10.69
  -3   6  -7   42.77    9.26
  -3  -6  -7   68.41   10.36
   3  -6   7   51.57    7.32
  -3  -6  -7   58.38    7.53
 -12   0  12  188.10   18.80
   1  -8   0    7.00    5.95
   1   8   0   11.33    4.92
  -1   8   0    6.87    5.44
  -1  -8   0   24.85    6.21
  -1   8   0   11.44   11.53
 -13   3  10    7.82   11.20
  13  -3 -10   12.68    7.54
 -16  -2   7    1.83    3.71
 -16   2   7   -1.57    9.10
  16  -2  -7   -0.28    5.11
  10   1   7    0.96    6.30
 -10  -1  -7    2.44   11.61
 -10   1  -7   -4.60    6.85
 -10  -1  -7    3.11    7.30
  10  -1   7  -10.29    6.76
 -10   1  -7    7.17   12.10
 -10  -4  -5   39.69    9.52
 -10   4  -5   49.15    9.86
 -10  -4  -5   44.79    8.63
   0  -7  -6   27.59    9.67
   0  -7   6   33.23    5.53
   0   7   6   42.19   15.35
   0   7  -6   33.13    6.41
   0   7   6   28.85    4.57
   2  -4  10  218.13   17.96
  -2   4 -10  222.98   18.50
  -2   4 -10  181.91   18.70
  -2  -4 -10  196.73   18.77
 -12   3  -4   82.85   15.21
 -12  -3  -4   96.31   11.47
 -12  -3  -4  106.75   13.24
  12  -3   4  123.45   11.06
 -12   3  -4  120.36   12.96
 -14   0  -3  -14.76   11.98
  14   0   3   -0.34    5.68
 -14   0  -3   -4.44    6.21
 -10  -3  -6   40.84    8.22
 -10  -3  -6   41.01   10.76
 -10   3  -6   28.03    8.52
 -10  -3  -6   33.07    9.65
 -10   3  -6   20.89   12.49
  10  -3   6   29.52    7.11
  -1   0 -12   -1.05    8.02
  -1   0 -12   15.34   10.37
  -1   0 -12   -2.85   10.50
   0  -8  -1   -6.83    6.91
   0   8   1   -4.97   11.72
   0   8  -1   10.00    5.46
   0   8   1    0.91    4.61
 -15   2   9   10.61    9.92
  15  -2  -9   20.73    6.35
  -1  -8   1  169.49   18.53
  -1   8   1  306.54   23.40
  -1   8   1  214.84   18.69
   1  -8  -1  275.56   19.64
 -11   4  -4  125.53   15.12
 -11  -4  -4   87.44   15.16
 -11  -4  -4  159.82   14.04
 -11   4  -4  134.27   15.85
 -11  -4  -4  159.50   15.09
  11  -4   4  128.36   13.00
  -8   6   8   -8.48   14.60
   8  -6  -8   -3.03    9.65
   8   6  -8   -1.36    4.57
 -10   6  -1   10.20   11.47
 -10  -6  -1   -2.55    6.02
 -10   6  -1   -1.54    6.12
 -10  -6  -1   -6.38    6.33
 -10  -6  -1   -4.02    5.68
   4  -1 -13   52.23   11.23
   4   1 -13   69.89   11.16
   4   1 -13   59.43    9.65
   4  -1 -13   54.10   10.58
   8  -7  -4   13.05    7.63
  -8   7   4   -0.46   12.93
   8   7  -4    8.13    4.21
  -8   7   4    3.99    4.33
   8  -1 -13    3.45    7.88
   8  -1 -13    4.73    8.75
  11  -6  -5    0.66    7.34
 -11   6   5   -9.57   12.95
 -11   6   5    4.47    4.51
  11   6  -5    0.25    3.62
  -2   5  -9   76.84    9.44
  -2  -5  -9   88.19    9.29
   2  -5   9   70.33    8.70
  -2  -5  -9   89.04   12.58
  -2   5  -9   75.22    9.83
  -2  -5  -9   83.13   11.91
   9  -4 -11    7.13    9.59
  -9   4  11   10.78   14.72
  -5  -2 -10  148.33   16.66
  -5  -2 -10  142.78   14.80
  -5  -2 -10  115.31   15.16
   5  -2  10  139.13   13.29
  -5   2 -10  128.83   16.80
  -5   2 -10  132.24   13.81
  -5   6  -6   24.27    9.44
  -5  -6  -6   35.70    6.76
   5  -6   6   23.34    6.30
  -5  -6  -6   44.08    9.28
  -5   6  -6   30.80    7.56
  -5  -6  -6   32.52    8.71
  -1  -8  -1  235.09   22.45
   1  -8   1  264.60   21.95
   1   8   1  232.34   24.70
  -1   8  -1  307.06   22.58
  -1   8  -1  264.00   24.52
   1   8   1  251.01   21.62
 -15   0  10   30.38    8.22
 -17   0   5   -2.27    6.25
 -17   0   5   -0.45    7.06
  -2   8   1   87.14    9.31
   2  -8  -1   81.75   10.20
  -2   8   1   77.42   14.62
  -2  -8   1   94.67    9.26
   3   0 -13  -10.12    8.52
   3   0 -13   -2.15    9.32
 -11  -6   1  188.00   15.06
 -11   6   1  144.50   15.42
  11  -6  -1  166.20   15.45
 -11   6   1  130.68   19.47
   2   8   0  151.08   12.50
  -2  -8   0  122.45   12.96
  -2   8   0  152.29   13.10
  -2   8   0  119.35   16.72
   2  -8   0  121.20   13.10
  -9  -4  -6   59.78   11.04
  -9  -4  -6   46.53    9.93
  -9   4  -6   43.11    9.32
  -9  -4  -6   70.24    9.58
   9  -4   6   48.07    7.75
  -9   4  -6   37.06   10.76
   6   7  -6    5.65    5.06
  -6   7   6   10.68    4.47
  -6   7   6   26.30   14.04
   6  -7  -6    8.36    8.99
   8  -5 -10   15.64    9.86
   8   5 -10   22.31    4.63
  -8   5  10    4.78   16.08
  13  -2 -11   -2.50    7.42
 -13   2  11    7.60   10.80
  -6  -5  -7   31.61    8.98
  -6   5  -7   27.36    8.35
  -6  -5  -7   24.62    7.73
  -6   5  -7   40.36    8.11
  -6  -5  -7   31.86   10.05
   6  -5   7   23.38    6.40
 -11   2  12    5.96   12.58
  11  -2 -12   18.50    8.52
   1   4 -11   -6.99    6.29
   1  -4 -11    3.62    9.32
  -1  -4  11    3.37    5.05
   1  -4 -11   -2.73   10.14
 -17   0   4  201.47   17.84
 -17   0   4  188.53   17.77
  -4   3 -10   30.03   10.60
  -4   3 -10   22.01    7.24
  -4  -3 -10   24.40    9.12
   4  -3  10   26.49    6.77
 -12   1  12  236.91   23.91
   9   0   8   13.36    6.72
  -9   0  -8   -2.79   11.75
   0   2 -12   14.54    7.61
   0   2 -12   -0.72    9.99
   0   2 -12    2.34   10.67
   0  -2 -12   12.49    9.08
   0  -2 -12   23.24   10.53
  14   1   3   -2.39    5.85
  14  -1   3   -0.71    5.89
 -14  -1  -3    3.00    6.03
 -14   1  -3   -8.86    7.34
 -14  -1  -3   -3.61   10.55
 -14   1  -3    1.71   12.21
 -13   5   6   50.53   13.62
  13   5  -6   50.35    5.44
  13  -5  -6   43.21    8.27
  -1   6  -8   -2.06    6.13
  -1  -6  -8   -6.77    9.08
  -1  -6  -8   -0.96    9.78
   1  -6   8   -6.16    4.92
  -1  -6  -8    1.76    4.99
  -1   1 -12  127.59   18.43
  -1   1 -12  189.53   17.06
  -1  -1 -12  174.33   18.48
  -1   1 -12  174.76   18.63
  -1  -1 -12  192.48   17.47
 -12   5  -1   28.70    8.70
  12  -5   1   31.79    7.21
 -12  -5  -1   37.87    7.85
 -12  -5  -1   39.76    6.97
 -12   5  -1   20.28   11.82
  -1  -5  10    2.99    4.74
   1   5 -10    2.89    6.18
 -14   0  11    6.55    8.56
   1  -8  -2   24.46    7.50
  -1   8   2   17.32    5.01
  -1  -8   2   20.06    5.23
  -1   8   2   24.13   12.34
  -8   7   0   -0.38    5.63
   8  -7   0    2.34    5.99
  -8   7   0   -3.74   11.89
  -8  -7   0    4.23    5.23
 -12  -4  -3  113.03   12.40
 -12   4  -3  107.97   14.72
  12  -4   3  134.43   12.27
 -12  -4  -3  141.11   13.80
 -12   4  -3  122.14   15.08
 -12  -4  -3   65.43   13.79
   9  -3 -12   35.59    9.95
  -3   7  -5   22.77    6.98
  -3  -7  -5   61.06    8.86
  -3  -7  -5   44.12   10.10
  -3   7  -5   10.37    9.75
   3  -7   5   19.58    6.06
  -3  -7  -5   36.11    5.87
  -6   3  -9    1.58    7.05
  -6  -3  -9   10.67    9.07
  -6   3  -9    0.30   10.84
  -6  -3  -9    4.39   10.68
  -6  -3  -9   10.03    9.05
   6  -3   9    6.35    6.47
   2   3 -12   68.46    9.62
   2  -3 -12   73.57   12.25
   2  -3 -12   73.91   11.47
 -17   0   6    0.14    5.36
 -17   0   6    2.74    7.18
  -3  -2 -11   44.57   10.52
  -3   2 -11   43.87   12.41
  -3  -2 -11   64.61   12.55
   3  -2  11   57.62    8.25
  -3   2 -11   42.79    9.14
  -3  -2 -11   73.38   11.07
 -13  -3  -3   21.46    6.92
 -13   3  -3   13.73   12.84
 -13  -3  -3    4.85    9.26
   0  -8  -2   38.15    8.42
   0   8   2   41.15    5.76
   0  -8   2   30.09    5.84
   0   8   2   45.38   13.00
  -9  -3  -7   68.94   12.29
  -9  -3  -7   55.02   11.43
  -9   3  -7   45.01   12.65
  -9   3  -7   64.37    9.73
  -9  -3  -7   84.05   10.21
 -15   3   8    3.36   10.46
  15  -3  -8   17.64    6.04
   2  -8  -2   24.93    7.39
  -2   8   2   15.73    5.34
  -2  -8   2   13.55    5.02
   2   8  -2   12.72    5.40
  13  -5  -1   -4.33    6.44
 -13  -5   1    1.13    6.09
 -13   5   1   -2.77    7.47
  -2  -8  -1   -7.16    6.61
  -2   8  -1    4.83    5.35
   2   8   1   -0.73    4.60
   2  -8   1   -3.11    5.54
  -2   8  -1   12.26   10.53
 -15   1  10  126.50   14.62
 -17   1   5    9.50    9.01
 -17  -1   5   15.89    5.55
 -17  -1   5   13.71    6.11
 -17   1   5   21.98    6.99
   3   1 -13   13.36    9.65
   3  -1 -13    0.28    8.60
   3   1 -13    4.24    8.36
   3  -1 -13   -4.24    9.73
  -1  -7  -6    1.46    4.52
  -1   7  -6   -4.58    5.55
   1  -7   6   10.70    4.91
  -1  -7  -6   -1.53    9.54
  -1  -7  -6    1.46    7.74
 -10   6   7    1.89   13.50
  10   6  -7    6.61    3.61
  10  -6  -7    8.86    8.37
 -15   2  -1   -4.69   11.56
 -15  -2  -1    4.78    9.05
 -15   2  -1    9.22    8.51
  15  -2   1   -2.43    5.72
 -15  -2  -1   -1.45    5.90
 -16   0   0   11.23    6.77
  16   0   0   28.06    5.99
 -16   0   0   30.05   10.57
   9  -1 -13    7.98    8.88
   9  -1 -13    9.69    7.51
  -3   8   1  152.73   19.45
  -3  -8   1  154.65   14.74
   3  -8  -1  172.00   15.62
  -3   8   1  177.45   15.08
 -12  -2  -5   26.35   10.49
  12  -2   5   13.60    6.59
  12   2   5   23.24    6.48
 -12  -2  -5   19.02    7.10
  -4   6   9    1.73    3.53
   4   6  -9  102.92    7.47
  -7   2  -9    6.59    7.13
  -7  -2  -9   -0.30   10.16
  -7   2  -9    2.24   11.94
   7  -2   9    2.02    6.62
  -4   0 -11  -11.99   11.65
  -4   0 -11    1.94   11.18
  -4   0 -11  -10.99    8.70
  -6   0 -10    9.68   11.40
  -6   0 -10    7.10    7.73
  -6   0 -10    0.98   11.62
  17  -1  -4    6.65    5.32
 -17  -1   4   -3.59    6.80
 -17   1   4   -6.78    8.38
 -17   1   4   -2.54    7.62
 -17  -1   4    2.97    5.23
 -11  -2  -6   54.45    8.66
  11  -2   6   40.01    7.58
 -11   2  -6   34.58    8.62
 -11  -2  -6   41.28   11.18
 -11   2  -6   42.86   13.46
 -11  -2  -6   28.46   11.24
  -5   6   9   45.03   16.87
   5   6  -9   38.52    6.43
  -5   6   9   37.70    4.53
   5  -6  -9   43.50   11.41
   9  -1   8   42.47    7.86
  -9  -1  -8   42.69    8.78
  -9   1  -8   37.05   13.03
  -9  -1  -8   46.40   12.88
  -9   1  -8   49.86    8.84
 -17   0   3    4.44    7.90
 -17   0   3   -1.47    6.45
  13  -4  -9   85.48   10.74
 -13   4   9   75.42   14.68
  12  -3 -11   10.28    8.49
 -12   3  11   13.57   12.00
 -16   0   9    0.87    7.19
  -3   8   0   24.26   11.59
  -3  -8   0    8.89    6.12
   3  -8   0    6.45    6.04
  -3   8   0   10.38    5.20
  -3   6   9  133.92   11.27
   3   6  -9  129.46   12.58
  -6  -7  -3   59.92    8.68
  -6   7  -3   51.29   12.83
   6  -7   3   61.73    7.95
  -6  -7  -3   60.06    7.35
  -6  -7  -3   19.25    9.56
  -6   7  -3   68.06    8.45
   1   8   2   13.69    4.65
   1  -8   2   20.47    5.34
  -1  -8  -2   15.80    7.57
   1   8   2   24.88   12.09
 -14   1  11    3.59    9.65
 -14   4   0    7.49   10.13
  14  -4   0    6.16    6.54
 -14  -4   0    0.91    5.61
 -14   4   0    9.10   11.70
 -14  -4   0   -7.02    7.54
 -14  -4   0   -1.84    6.88
 -12   5   8   49.07   14.92
  12  -5  -8   60.23    9.53
  12   5  -8   50.33    5.59
  15  -4  -4   29.59    7.11
 -15   4   4   32.51   10.03
 -15   4   4   40.26   13.13
 -15  -4   4   43.38    6.35
  -3   8   2    0.34    4.98
  -3   8   2   14.36   12.96
   3  -8  -2    7.54    6.90
   3   8  -2    6.79    4.99
  -3  -8   2    6.27    4.59
 -17  -1   6   24.63    5.40
 -17   1   6   12.57    8.77
 -16   3   4  158.19   17.15
 -16  -3   4  145.28   13.22
  16  -3  -4  150.89   13.32
 -16   3   4   98.59   14.72
   8   7  -5  166.55   14.66
  -8   7   5  177.76   14.53
  -8   7   5  132.08   20.26
 -16   2   1   56.46   11.69
 -16  -2   1   47.55    9.87
 -16   2   1   60.54   10.89
  16  -2  -1   55.12    7.82
 -16  -2   1   60.68    7.18
 -16   3   5   -9.01   10.46
 -16  -3   5    2.18    4.81
  16  -3  -5    4.03    5.51
 -16   3   5   -4.49    8.20
   7  -7   2   11.79    6.18
  -7  -7  -2    7.07    5.15
  -7  -7  -2    4.12    6.10
  -7   7  -2   11.71   11.64
  -7   7  -2    8.74    5.98
  -7  -7  -2    6.26    7.24
  -8   4  -7   -5.47    7.71
  -8  -4  -7    3.24    8.45
  -8   4  -7    3.49    9.45
  -8  -4  -7    8.44    8.15
  -8  -4  -7    5.85    9.39
   8  -4   7    3.76    5.87
   6  -2 -13   -0.88    9.09
   6  -2 -13    8.29    8.74
 -13  -2  -4   22.44    6.84
  13  -2   4   16.41    6.56
 -13   2  -4   21.61   12.94
  13   2   4   26.88    6.45
 -13   2  -4   21.81    8.31
   2  -3  11    0.54    5.78
  -2   3 -11    6.98    9.38
  -2  -3 -11    0.67    8.14
  -2  -3 -11   -9.13   10.82
  -2  -3 -11    9.04    9.07
  -2   3 -11   -7.01    7.13
   2   0 -13  -10.94    8.59
   2   0 -13    2.88    9.81
 -11   6   6   41.42    6.35
  11  -6  -6   64.89    9.61
  11   6  -6   51.84    5.79
 -15  -4   5    4.04    4.91
  15  -4  -5   15.01    6.08
 -15   4   5   -1.60   11.62
 -15   4   5   -5.54    8.61
 -16   2   8   71.31   12.59
  16  -2  -8   92.03    9.40
  15   0   2    4.04    6.04
 -15   0  -2   -4.46    6.55
 -15   0  -2    5.81   11.07
  -8  -6  -4    0.20    6.39
   8  -6   4    1.15    6.15
  -8   6  -4   11.22    7.10
  -8  -6  -4   -0.22    7.26
  -8  -6  -4    0.25    7.58
  -8   6  -4    8.47   10.66
  -6   6   9  385.04   37.99
   6   6  -9  403.23   32.73
   6  -6  -9  407.56   34.79
   5  -2 -13   22.52    9.78
   5  -2 -13   34.57   10.35
   7  -2 -13   -0.26    8.90
   7  -2 -13    7.65    9.59
   7   7  -6    8.17    4.84
  -7   7   6    2.89   14.01
  -7   7   6    7.60    3.84
  -5  -7  -4   21.27    5.52
  -5  -7  -4   15.54    7.69
   5  -7   4   19.80    6.02
  -5  -7  -4    5.32    8.36
  -5   7  -4   20.95   10.95
 -16   1   0    2.50    7.03
 -16   1   0   12.62   10.50
 -16  -1   0   -2.01    9.44
 -16  -1   0    4.10    5.55
  16   1   0    7.53    5.43
  16  -1   0    7.65    5.48
   9  -6  -8    5.73    9.29
   9   6  -8    6.70    4.40
  -9   6   8   -6.93   14.74
 -15  -3   0    2.52    5.39
 -15   3   0    6.77   10.18
 -15   3   0   -5.02   11.27
 -15  -3   0    2.58    8.10
  15  -3   0   11.50    6.13
  -9   5  10   55.75   16.57
   9  -5 -10   56.34   11.81
  -4  -1 -11    5.21   11.04
  -4  -1 -11   -6.98    9.03
  -4   1 -11  -13.22    8.21
  -4   1 -11  -11.83   11.85
  -4   1 -11  -15.09   11.96
  -4  -1 -11    3.82   11.53
  -6  -1 -10  181.76   16.60
  -6  -1 -10  178.12   18.93
  -6  -1 -10  132.72   18.31
  -6   1 -10  137.47   18.97
  -6   1 -10  162.51   15.78
 -10   5  -4   48.37   11.41
 -10  -5  -4   51.54    9.03
  10  -5   4   49.75    7.75
 -10  -5  -4   22.55    9.76
 -10  -5  -4   51.81    8.97
 -10   5  -4   43.36    9.55
 -17   0   7   -3.24    7.27
  -9   6  -3   61.12   12.77
  -9  -6  -3   42.72    8.68
  -9   6  -3   42.92    8.59
   9  -6   3   53.10    8.24
  -9  -6  -3   69.72    8.48
  -9  -6  -3   21.09    9.14
  10  -4 -11   15.88    9.78
 -10   4  11    3.51   15.19
 -11   5   9  152.30   20.05
  11  -5  -9  164.85   16.65
 -15  -4   3    6.20    6.02
 -15   4   3   18.02    9.88
  15  -4  -3    6.48    6.25
 -15   4   3   14.99   12.34
 -14   4   8   15.18   12.30
  14  -4  -8   10.23    7.17
  -3   7   7   57.70    5.77
   3  -7  -7   56.91   11.32
   3   7  -7   37.25    7.35
  -3   7   7   58.31   17.19
 -12   4  10   70.40   15.60
  12  -4 -10   68.20   10.75
 -11   6   0   54.12    8.55
 -11   6   0   59.12   14.15
  -9  -5  -5   20.45    8.37
   9  -5   5   16.30    6.46
  -9  -5  -5   26.49    8.23
  -9  -5  -5    6.17    9.15
  -9   5  -5   10.97    9.31
  -2  -6   9  109.89   10.59
   2   6  -9  126.87   11.69
 -17  -1   3   27.22    8.17
 -17   1   3   44.14    9.20
 -17  -1   3   26.52    5.98
 -17   1   3   28.02    9.22
  17  -1  -3   32.90    6.28
 -10  -2  -7    0.76    7.74
  10  -2   7    8.79    6.60
 -10   2  -7    6.20   13.07
 -10  -2  -7    2.66   10.87
 -10  -2  -7   -2.23   10.45
 -10   2  -7   -4.60    7.21
 -16   1   9   10.47    8.89
  -9   7   3   72.33    8.68
   9   7  -3   88.46    8.34
  -9   7   3   70.18   15.35
  -9   7   2   10.22    5.36
   9  -7  -2   21.64    7.17
  -9   7   2    4.38   12.76
   9   7  -2   16.80    4.46
   4   7  -7  454.32   37.94
   4  -7  -7  471.19   39.70
  -4   7   7  471.73   42.34
  -4   7   7  475.94   37.27
  -1  -8   3   -1.42    4.61
   1  -8  -3    8.21    8.19
  -1   8   3   -0.42    4.38
   1   8  -3    8.96    5.91
   2   8  -3  155.78   13.24
  -2   8   3  136.79   12.39
  -2  -8   3  123.37   12.25
   2  -8  -3  135.73   14.56
  -2   8   3  181.11   18.46
 -16   3   3  160.08   19.06
 -16  -3   3  220.23   17.73
  16  -3  -3  193.87   17.23
 -16   3   3  182.39   20.49
  -3   8  -1    8.25    5.31
   3  -8   1   10.14    5.74
  -3   8  -1    1.78   10.89
   3   8   1   13.11    4.43
  -3  -8  -1    9.08    6.72
  13  -4   2    0.57    6.36
 -13  -4  -2   -7.66    8.10
 -13  -4  -2   -0.19    6.35
 -13   4  -2    2.05   11.02
   0  -4 -11   61.09   12.40
   0   4 -11   67.97    8.89
   0   4 -11   60.21    9.17
   0  -4 -11   87.82   11.79
   0  -4  11   64.25    7.99
 -16   3   6    2.23   10.33
  16  -3  -6    3.01    5.53
 -16  -3   6   -0.12    4.28
  -2   7   7   47.03   18.34
  -2   7   7   52.29    7.72
   2  -7  -7   65.32   12.96
   0  -5  10   78.33    8.71
   0   5 -10   84.05   10.10
  10  -3 -12   26.23    9.70
 -10   3  12   36.70   14.49
   7  -6   5  210.54   18.71
  -7   6  -5  195.49   20.91
  -7  -6  -5  263.42   19.12
  -7  -6  -5  232.18   19.85
   4  -8  -1    4.98    6.49
  -4   8   1   13.80   12.19
   4   8  -1    1.53    4.67
  -4  -8   1   -3.95    5.37
  -4   8   1   -5.24    5.17
  -5  -4  -9   14.88   10.73
  -5  -4  -9   14.90    9.19
  -5  -4  -9    6.44    8.11
  -5   4  -9    6.05    6.68
  -5   4  -9    4.41    8.63
   5  -4   9    4.06    5.91
  -4  -6  -7   81.62   11.42
  -4  -6  -7   74.76   10.95
  -4  -6  -7   73.10    8.44
  -4   6  -7   58.69   10.11
   4  -6   7   51.81    7.98
  -4   6  -7   71.71    9.69
   2   8   2   12.57    4.54
  -2   8  -2    4.88    5.38
   2  -8   2    5.55    5.12
  -2  -8  -2   10.65    7.50
  -2   8  -2   -2.02   10.84
   1   3 -12   18.91    8.30
   1  -3 -12   25.86   10.79
   1   3 -12   20.15    7.47
   1  -3 -12    5.14    9.86
   1   3 -12   20.42   10.08
   4  -2 -13   40.20   10.80
   4  -2 -13   29.57    9.75
   8  -2 -13    4.45    8.77
   8  -2 -13   -0.30    9.39
   2  -1 -13   37.16   10.65
   2   1 -13   18.33   10.29
   2  -1 -13   30.95    9.36
   2   1 -13   16.11    8.79
 -13   0  12  367.60   31.44
  13   5  -7   91.24    8.35
 -13   5   7   90.68   15.93
  13  -5  -7   91.12   11.09
   0   8   3   64.14    7.14
   0   8   3   51.51   14.48
   0   8  -3   61.71    8.14
   0  -8   3   69.44    7.52
   0  -8  -3   54.89    9.96
  -8  -7  -1   60.73    8.20
  -8  -7  -1   57.16    6.93
  -8   7  -1   43.90    7.60
   8  -7   1   32.73    7.51
  -8   7  -1   23.47   12.91
  10  -1 -13   -0.41    7.47
  10  -1 -13   -0.99    8.57
  15  -1   2  201.94   18.71
 -15  -1  -2  238.61   18.95
  15   1   2  241.52   18.77
 -15   1  -2  162.95   22.22
 -15   1  -2  205.60   19.59
 -15  -1  -2  199.34   21.07
 -11   5  -3   33.44    9.04
 -11  -5  -3    4.51    8.50
 -11   5  -3   19.69   11.07
 -11  -5  -3   12.60    7.28
 -11  -5  -3   22.01    7.92
 -14   3  -2   14.33   13.02
 -14   3  -2   27.37    9.92
 -14  -3  -2   30.15    9.44
 -14  -3  -2   35.73    6.97
 -14  -3  -2    8.70    9.46
  14  -3   2   37.66    7.02
  -4   8   2   35.48   13.53
  -4   8   2   37.55    5.98
   4  -8  -2   33.27    7.84
   4   8  -2   27.48    5.69
   8  -3   8   20.57    6.78
  -8  -3  -8    2.21   10.63
  -8   3  -8   24.83   11.85
  -8  -3  -8    7.68    8.52
  -8  -3  -8   24.93   10.16
  -8   3  -8   14.20    7.72
 -15  -4   6   43.24    5.58
  15  -4  -6   39.61    7.46
 -15   4   6   37.57   12.46
  -5   7   7    1.50   15.12
   5   7  -7    1.05    5.19
   5  -7  -7   -0.31   10.05
  -5   7   7   -0.34    3.82
  -3   4 -10    1.04    6.41
  -3  -4 -10   -5.79    7.65
   3  -4  10   -5.39    5.82
  -3   4 -10   -2.86    7.81
  -3   8   3    2.13   12.70
   3  -8  -3    0.94    7.81
   3   8  -3    9.71    5.40
  -3   8   3    2.62    4.92
  -2   0 -12  281.97   25.49
  -2   0 -12  296.32   24.01
  -2   0 -12  216.12   24.92
  -2   6  -8   93.99   10.76
   2  -6   8   87.53    9.59
  -2  -6  -8  101.59   13.17
  -2   6  -8   83.73   10.92
  -2  -6  -8   99.94   12.54
  -2  -6  -8   98.80    9.83
  -8   0  -9   -5.65    7.71
  -8   0  -9    0.70   12.34
   8   0   9   -1.85    6.71
 -17   1   7    5.65    8.77
  -4   8   0  -12.70   11.58
   4  -8   0   -7.07    6.07
  -4   8   0   -9.05    5.57
  -4  -8   0   -0.16    5.96
   7  -6  -9   20.02   11.00
   7   6  -9   35.93    6.23
  -7   6   9    9.19   16.79
   9   7  -4    3.33    4.18
  -9   7   4   -0.31    4.57
 -17   0   2   25.64    7.05
 -17   0   2   21.96    8.66
  -9   7   1   -3.82   12.48
   9  -7  -1   -3.41    6.40
  -9   7   1   -5.26    5.45
  -5  -5  -8   -2.01    9.15
   5  -5   8   -5.96    5.87
  -5   5  -8    4.88    7.55
  -5   5  -8   -3.11    7.55
  -5  -5  -8    5.65    7.21
  -5  -5  -8    0.98    9.88
  -2   7  -6   30.56    7.32
  -2  -7  -6   31.34    9.97
   2  -7   6   49.46    6.55
  -2  -7  -6   40.21    9.29
  -2  -7  -6   36.27    6.13
  -3  -5  -9   26.46    9.67
  -3  -5  -9   27.09    7.19
  -3   5  -9   19.75    7.34
   3  -5   9   23.05    5.96
  -3  -5  -9   23.57   10.66
  -3   5  -9   28.52    7.73
  12  -2 -12    5.12    8.60
 -12   2  12    2.44   11.69
  -8  -5  -6    1.05    8.19
  -8  -5  -6    2.53    9.29
  -8  -5  -6    7.71    7.63
  -8   5  -6    4.41    8.66
  -8   5  -6   -3.02    7.75
   8  -5   6   -1.50    6.08
 -10   6  -2   20.27   12.04
 -10  -6  -2    6.71    6.62
 -10  -6  -2    6.54    7.13
  10  -6   2   20.25    6.63
 -10  -6  -2   28.08    6.71
 -10   6  -2   21.19    7.34
 -14   2  -3   45.64   13.38
 -14  -2  -3   35.38   11.16
 -14  -2  -3   49.72    7.87
  14   2   3   53.86    7.51
 -14   2  -3   47.37    9.23
  14  -2   3   41.69    7.56
  -1  -2 -12   69.69   12.77
  -1   2 -12   71.23   12.87
  -1   2 -12   49.23   12.17
  -1   2 -12   58.88    9.88
  -1  -2 -12   71.81   11.30
  12  -6  -3    7.34    6.49
 -12  -6   3    7.33    5.10
 -12   6   3    8.32   12.58
 -12   6   3   -0.74    5.53
   1  -7  -7  150.94   16.75
  -1   7   7  138.85   21.32
  -1  -7   7  137.76   13.04
  -1   7   7  153.62   12.80
   1   7  -7  159.79   14.07
  -4  -7  -5   -2.69    5.20
  -4   7  -5  -11.87    6.71
   4  -7   5    4.03    5.74
  -4  -7  -5    2.70    7.49
  -4   7  -5   -7.44   10.02
  -4  -7  -5   -2.24    8.56
 -12  -6   4   84.40    8.11
  12  -6  -4   57.07    9.48
 -12   6   4   66.80    8.38
 -12   6   4   62.97   15.18
 -13   5   0   16.90    8.54
  13  -5   0   31.00    7.04
 -13   5   0    5.57   12.14
 -13  -5   0   24.31    7.26
   1  -6  -9    0.31    9.59
   1   6  -9    6.07    6.02
   1  -6  -9   -1.41   10.71
  -1  -6   9   -4.66    4.65
 -15  -4   2  218.45   19.26
 -15   4   2  167.55   20.73
 -15   4   2  220.66   22.65
  15  -4  -2  236.09   19.05
   1  -8   3   67.79    7.98
   1   8   3   55.81   14.78
  -1  -8  -3   83.82   10.53
   1   8   3   75.84    7.75
 -13   1  12   18.81   10.57
 -14   3  10   27.80   12.44
  14  -3 -10   43.63    8.46
 -15   2  10  148.92   17.36
 -17   2   5   42.78    8.75
  17  -2  -5   48.51    6.82
 -17  -2   5   44.55    6.92
 -17   2   5   14.18   10.69
   3  -2 -13   20.87    9.67
   3  -2 -13   20.84   10.24
   3   2 -13   21.43   10.30
   3   2 -13   29.82    8.48
  -2  -1 -12    0.29    9.00
  -2   1 -12    4.63   11.57
  -2   1 -12   -3.41    8.08
  -2  -1 -12   -6.47   10.89
  -2   1 -12    0.37   11.36
  -2  -1 -12    0.57   10.51
   9  -2 -13  108.52   13.33
   9  -2 -13   98.63   12.62
  14  -5  -4   39.41    7.91
 -14   5   4   44.43    8.88
 -14  -5   4   53.20    6.44
 -14   5   4   54.72   13.62
   8  -1   9    5.13    7.02
  -8   1  -9    1.29    7.87
  -8  -1  -9   -4.55   11.84
  -8   1  -9    1.04   12.51
   1   0 -13    1.08    8.61
   1   0 -13    8.45   10.27
  -4   8   3  295.66   32.40
  -4   8   3  411.24   29.13
   4  -8  -3  324.55   29.78
   4   8  -3  331.37   28.99
 -16  -3   2  114.63   12.12
 -16   3   2  108.16   15.21
  16  -3  -2  117.65   11.41
 -16   3   2   75.31   14.34
 -12   6   2    7.01    5.87
 -12   6   2    7.68   12.98
 -12  -6   2    2.69    5.13
  12  -6  -2    8.32    6.41
 -17   1   2   32.49   10.62
 -17  -1   2   35.04    8.93
 -17   1   2   44.95    8.97
 -17  -1   2   44.51    6.80
  17  -1  -2   37.57    6.70
  -6  -6  -6    9.74    8.16
  -6  -6  -6    1.18    8.72
  -6   6  -6   12.95    9.13
  -6   6  -6   10.57    7.83
   6  -6   6   15.33    6.21
  -6  -6  -6    4.73    6.73
  -6   7   7  -12.35   15.30
   6   7  -7   -3.47    5.66
  -6   7   7    1.45    3.93
 -11   0  13   -8.36   11.05
  -7  -4  -8   21.61    9.03
   7  -4   8   15.44    6.80
  -7  -4  -8   21.68   10.44
  -7   4  -8   10.37    7.87
  -7   4  -8   18.29    9.98
  -7  -4  -8   19.06    8.85
 -17  -2   4   54.75    8.19
 -17   2   4   50.29   10.04
 -17   2   4   29.40   11.49
  17  -2  -4   52.09    7.21
  -9  -2  -8   -6.35   10.42
  -9  -2  -8    5.77   11.13
  -9  -2  -8    2.70    8.24
   9  -2   8   -9.28    7.09
  -9   2  -8  -11.16    7.54
  -9   2  -8   -8.25   13.43
 -16  -3   7    4.02    3.76
  16  -3  -7   -0.81    5.57
 -16   3   7    2.57   10.14
 -14   5   3  168.82   21.31
 -14  -5   3  217.23   16.71
  14  -5  -3  183.31   17.05
 -14   5   3  146.54   17.61
  -8   7   6   -7.32   14.29
   8   7  -6    0.74    4.49
  -8   7   6    0.73    3.67
 -15   3   9   15.90   11.38
  15  -3  -9   14.95    7.05
   3  -8   2    2.66    5.50
  -3  -8  -2   -9.83    7.80
   3   8   2   -0.58    4.44
  -3   8  -2   -0.36   10.91
  -3   8  -2   -0.57    5.31
 -14   2  11   -3.93   10.73
   6  -4 -12   66.55   11.15
   6  -4 -12   60.05   12.56
   5  -4 -12   29.03   10.23
   5  -4 -12   24.61   11.23
   4  -8   1   -0.99    5.74
   4   8   1    7.79    4.52
  -4   8  -1    8.75    5.49
  -4  -8  -1   -0.19    6.51
  -4   8  -1   -9.65   11.14
  12  -6  -5   69.72    9.95
 -12   6   5   78.32    8.42
  12   6  -5   77.24    7.59
 -12   5  -2   18.90    9.31
 -12  -5  -2   14.69    8.10
 -12  -5  -2   24.24    7.09
  12  -5   2   22.99    7.26
 -12   5  -2   35.01   11.95
 -14   5   5   20.18    7.61
 -14   5   5   16.56   12.67
  14  -5  -5   30.99    7.25
 -14  -5   5   28.58    5.34
  12   0   6  244.51   21.29
 -12   0  -6  250.26   21.66
 -12   0  -6  234.62   24.51
  10  -5 -10  114.93   14.44
 -10   5  10  115.84   18.29
 -17   2   6   17.41   10.14
 -17  -2   6   24.61    5.23
  17  -2  -6   21.96    5.89
  13   0   5   -2.73    6.58
 -13   0  -5   -6.38    7.34
  -5   8   1  236.81   19.88
  -5   8   1  217.99   23.80
   5  -8  -1  212.69   20.28
   5   8  -1  246.88   19.63
  11  -6  -7  185.65   17.69
  11   6  -7  178.21   15.13
  -5   8   2   -4.79   12.90
  -5   8   2   -7.34    5.03
   5  -8  -2    2.11    6.96
   5   8  -2    4.66    4.69
   9   7  -5    1.27    4.33
  -9   7   5    2.43    4.30
  -9   7   5   -5.82   13.98
   0  -7   7   42.72    6.27
   0  -7  -7   49.98   11.22
   0  -7  -7   56.98    9.74
   0   7  -7   41.10    7.45
   8  -6  -9   72.52   12.58
  -8   6   9   60.28   16.49
   8   6  -9   64.77    7.38
   5  -5 -11   83.34   12.00
   5  -5 -11   74.48   12.54
   5   5 -11   61.66    8.65
   9  -7   0    7.06    6.42
  -9  -7   0   10.38    5.40
  -9   7   0    8.85   12.71
  -9   7   0    3.39    5.87
  -5   3 -10   10.44    7.14
  -5   3 -10    7.53   11.50
   5  -3  10   -3.79    6.52
  -5  -3 -10   -1.60    8.86
 -15   4   7   -0.41   11.90
 -15  -4   7    7.75    3.99
  15  -4  -7    9.80    6.42
   2  -8  -4    5.76    8.29
  -2   8   4    0.45   13.66
   2   8  -4   24.09    6.43
  -2   8   4   14.24    4.46
  11  -4 -11   41.75   10.60
 -11   4  11   52.66   15.04
   7  -4 -12   18.38    9.46
   7  -4 -12   11.10   10.39
   4  -4 -12   89.79   13.17
   4  -4 -12   78.40   12.46
 -16   2   0    5.06   11.34
 -16  -2   0    4.44    8.68
 -16  -2   0   12.35    5.56
  16  -2   0   11.20    6.09
 -16   2   0    6.70    8.62
  10  -6  -8  247.91   24.29
  10   6  -8  275.97   22.12
  -4   2 -11   31.51   12.69
  -4  -2 -11   15.46    9.86
  -4   2 -11   52.50    8.83
  -4  -2 -11   39.20   12.06
   4  -2  11   38.79    7.66
  -4  -2 -11   53.37   10.28
   1   1 -13   -1.82    8.32
   1   1 -13    4.14   10.26
   1  -1 -13   18.28   10.48
   1  -1 -13    2.02    9.26
  -6  -2 -10   -7.51   10.02
   6  -2  10    5.70    6.95
  -6   2 -10    1.62   12.81
  -6   2 -10   12.69    7.81
   6  -5 -11  235.89   19.15
   6   5 -11  163.73   16.85
   6  -5 -11  224.81   20.27
 -13   3  11   -4.61   12.11
  13  -3 -11   -5.21    8.43
  -1   8   4    0.83    3.98
   1  -8  -4   -1.61    8.73
  -1   8   4   12.07   13.60
  -1  -8   4   -1.43    4.59
   1   8  -4   10.39    5.71
  -7  -5  -7   16.00    8.05
  -7   5  -7    6.14    8.32
  -7  -5  -7    8.25    9.87
  -7  -5  -7   10.92    8.68
  -7   5  -7    7.45    8.21
   7  -5   7   10.71    6.31
  11  -3 -12   71.64   11.14
 -11   3  12   37.33   15.61
 -11   1  13   13.35   12.38
   4   5 -11   35.34    6.48
   4  -5 -11   18.94   10.10
   4  -5 -11    8.70   11.03
  -1   5 -10    2.33    6.72
   1  -5  10    2.07    5.45
 -11   6  -1    5.44    6.33
 -11   6  -1   -9.10   12.53
  17  -2  -3    3.71    5.79
 -17   2   3   -6.31    9.76
 -17   2   3    4.03    9.29
 -17  -2   3   -3.08    6.93
  16   0   1    2.33    5.81
 -16   0  -1   -8.17    6.50
  -3   8   4   -0.61    4.59
   3  -8  -4   -9.51    8.65
  -3   8   4    5.41   13.53
   3   8  -4    6.51    5.71
  -2  -8  -3   74.33   10.25
   2   8   3   70.01    7.40
   2  -8   3   50.62    7.84
   2   8   3   88.37   15.17
 -16   2   9   23.45   10.80
   0   3 -12  138.06   15.27
   0  -3 -12  156.05   16.35
   0   3 -12  118.74   16.64
   0   3 -12  150.44   14.52
   0  -3 -12  147.69   17.10
 -14   4  -1   -4.63   11.09
 -14  -4  -1    0.70    5.86
  14  -4   1   -6.95    6.59
 -14  -4  -1   -0.47    7.48
 -14  -4  -1    7.69    8.03
  11   0   7   -8.07    6.78
 -11   0  -7    2.56    7.79
 -11   0  -7  -21.27   12.54
  -1  -4 -11   16.26    9.95
  -1  -4 -11   32.09   11.11
  -1   4 -11   14.96    7.91
   1  -4  11   34.23    6.46
  -1   4 -11   20.55    7.22
  -5  -8   0    9.98    5.94
  -5   8   0   -8.80   12.01
   5  -8   0   -3.24    5.96
  -5   8   0    4.17    5.31
  -7  -7  -3    2.27    7.10
  -7  -7  -3    7.27    5.42
  -7   7  -3   13.60   11.77
  -7  -7  -3   -0.71    7.78
  -7   7  -3   -4.55    6.69
   7  -7   3   -4.03    6.34
 -17   1   8   38.31   10.09
   0  -6   9   49.98    6.86
   0  -6  -9   72.62   11.26
   0  -6  -9   57.00   11.98
   0   6  -9   51.01    8.09
  12   1   6   37.48    8.15
 -12   1  -6   42.62   13.94
  12  -1   6   41.78    7.91
 -12  -1  -6   55.11   13.65
 -12  -1  -6   55.26    9.14
 -12   1  -6   52.04    8.74
 -14  -5   2   -5.93    6.51
  14  -5  -2   13.80    6.52
 -14   5   2    1.65    8.84
  -3  -3 -11    3.88    8.50
   3  -3  11   -0.58    6.23
  -3   3 -11    1.43   10.45
  -3  -3 -11   13.49   11.20
  -3  -3 -11    2.77    9.78
  -3   3 -11   16.77    7.34
 -14   0  -4  517.63   47.00
 -14   0  -4  585.07   45.26
  14   0   4  549.28   44.87
 -13  -1  -5    7.60    7.14
 -13   1  -5    9.43    7.50
  13   1   5   14.06    6.50
  13  -1   5    7.28    6.53
 -13  -1  -5   11.58   12.07
 -12   6   1   11.87    6.49
  12  -6  -1    2.57    6.59
 -12   6   1   -7.69   12.92
 -12  -6   1   22.55    6.24
  -5   8   3  103.72    8.92
   5  -8  -3   79.97   10.86
   5   8  -3   73.12    8.80
  -5   8   3   72.27   16.15
   2  -2 -13   10.66    9.61
   2  -2 -13   -3.82   10.40
   2   2 -13    3.76    7.67
   2   2 -13    7.88   10.06
   6  -7   4    6.80    6.01
  -6  -7  -4   -2.99    7.59
  -6   7  -4    7.10   10.87
  -6  -7  -4    3.22    8.55
  -6  -7  -4   -0.65    5.53
   0   8   4    3.09   13.30
   0   8   4    1.65    4.13
   0  -8  -4   -3.84    8.88
   0  -8   4   -2.33    4.80
   0   8  -4    0.39    5.55
  10  -2 -13   12.96    9.35
   7  -5 -11  140.35   16.99
   7   7  -7  275.41   22.53
  -7   7   7  266.67   21.83
  -7   7   7  238.73   27.36
  15  -2   2  118.98   11.74
 -15  -2  -2  118.26   14.65
 -15  -2  -2  117.87   11.84
 -15   2  -2   96.55   16.04
  15   2   2  115.42   11.45
 -15   2  -2  113.36   13.27
  15  -4  -1  -10.17    6.89
 -15   4   1  -16.73   11.03
 -15  -4   1    2.02    7.16
 -15   4   1  -22.19   12.84
 -11  -4  -5    6.45   10.22
 -11   4  -5   29.14    9.66
 -11  -4  -5   21.48    8.48
 -14   5   6    0.45   12.33
  14  -5  -6    7.66    7.14
  -3   7  -6   -5.78    9.29
   3  -7   6    3.57    5.24
  -3  -7  -6   -2.72    9.21
  -3   7  -6    2.02    6.59
  -3  -7  -6   -4.09    5.08
  -3  -7  -6   -6.11    8.19
  17   0  -1    1.49    5.34
 -17   0   1    8.77    9.14
 -17   0   1    6.21    6.65
  12  -5  -9   -6.36    8.69
 -12   5   9  -10.47   14.09
  -3  -5  11    1.80    4.49
   3  -5 -11   -3.46   10.45
   3   5 -11   -0.60    6.14
   3  -5 -11   -9.37   10.93
   8  -4 -12   28.95   10.78
  -8   7  -2   90.10   11.63
  -8  -7  -2  120.80   10.57
  -8  -7  -2  116.10   11.07
  -8   7  -2   82.52   15.68
  -8  -7  -2   72.23   11.74
   8  -7   2   98.18   11.16
  -5   0 -11    0.33   11.82
  -5   0 -11   -9.82    8.71
  -5   0 -11   -3.71   11.76
 -15  -3  -1   20.75    6.26
 -15   3  -1   11.51   12.00
 -15  -3  -1   29.58    9.52
 -15   3  -1   10.70   10.19
 -15  -3  -1   14.66    8.97
  15  -3   1   22.60    6.73
 -12  -3  -5   25.68    8.59
 -12   3  -5   67.36   10.34
 -12  -3  -5   30.70   11.06
 -12  -3  -5   10.58   11.31
  12  -3   5   91.03    8.84
   3  -4 -12    5.08   10.38
   3   4 -12   -0.99    6.47
   3  -4 -12    0.31    9.87
   7  -3   9   -1.84    6.49
  -7  -3  -9   -4.12    8.92
  -7  -3  -9   -0.29    9.26
  -7   3  -9   -5.03    7.46
  -7  -3  -9    1.53   11.13
  -7   3  -9    5.41   12.08
 -14   4   9   24.64   12.85
  14  -4  -9   20.92    8.11
 -13   5   8   10.81   13.91
  13  -5  -8   11.59    7.94
 -17  -2   7    1.28    4.15
  17  -2  -7   -1.45    5.58
   4  -8  -4   55.46   10.12
   4   8  -4   60.61    7.63
  -4   8   4   46.66   14.63
  -4   8   4   48.02    6.68
 -11  -3  -6   35.11   10.87
 -11  -3  -6   16.68   10.07
 -11   3  -6   18.96    8.21
 -11  -3  -6   17.04    7.88
 -11   3  -6    9.06   12.95
  11  -3   6   17.14    6.91
  16   1   1    8.66    5.82
 -16   1  -1    1.26    7.62
 -16   1  -1   17.41   11.70
 -16  -1  -1    6.47   10.05
  16  -1   1   -2.08    5.82
 -16  -1  -1    0.38    6.06
   3  -6   8   56.12    8.27
  -3  -6  -8   69.51    8.72
  -3   6  -8   73.06    9.89
  -3   6  -8   60.14    9.69
  -3  -6  -8   86.75   12.21
  -3  -6  -8   92.41   11.80
  13  -4 -10   12.03    8.30
 -13   4  10  -13.89   13.66
 -15   1  11    0.30    9.46
 -12   4  -4   10.88   16.96
  12  -4   4   35.05   15.73
 -12  -4  -4   12.57   16.90
 -12   4  -4   13.72   18.21
  12  -6  -6   -1.16    7.46
  12   6  -6    5.35    3.68
 -11   1  -7   34.85   13.32
 -11  -1  -7   26.42   12.42
 -11  -1  -7   18.66    7.92
  11   1   7   27.10    7.06
  11  -1   7   19.29    6.98
 -10  -4  -6    5.49    8.99
 -10  -4  -6   -0.34    9.80
 -10   4  -6    1.29   11.17
 -10   4  -6    4.94    8.43
 -10  -4  -6    7.36    8.23
  10   7  -3   36.65    5.53
 -10   7   3   32.45    6.12
 -10   7   3   42.41   14.01
 -16   1  10   57.42   10.82
  -5  -6  -7   74.61   14.37
  -5   6  -7  113.21   12.82
   5  -6   7  124.20   11.82
  -5  -6  -7  128.51   12.05
  -5  -6  -7  148.57   14.03
  -5   6  -7   91.70   13.31
 -16   3   1   22.38   11.15
 -16  -3   1   24.91    8.31
  16  -3  -1   12.05    6.67
 -16   3   1   20.96   11.57
 -14   1  -4    3.16    7.44
 -14   1  -4    4.42   12.83
 -14  -1  -4    6.29    7.26
  14   1   4    4.49    6.75
  14  -1   4   -0.19    6.19
   6  -3 -13    5.59   10.72
   6  -3 -13   -6.11    9.93
  -4   8  -2   71.29    8.87
  -4   8  -2   71.59   14.10
   4   8   2   73.96    7.80
   4  -8   2   61.38    8.37
  -4  -8  -2   84.12   10.35
 -10   7   2   -1.75    5.50
 -10   7   2    6.31   12.42
 -10  -7   2   -2.40    5.37
 -13   3  -4   76.70   15.52
 -13  -3  -4  119.64   12.89
  13  -3   4   85.31    9.63
 -13  -3  -4   67.71   10.02
   1  -7   7   31.09    6.15
  -1   7  -7   41.69    7.48
  -1  -7  -7   43.86    6.32
  -1  -7  -7   49.31   10.74
  -1  -7  -7   29.85    9.70
 -13   2  12 1476.36  117.95
  -7   0 -10   54.36    9.77
  -7   0 -10   32.87   12.75
  16  -3  -8   37.23    6.92
 -16   3   8   -0.38   11.14
 -17  -1   1    8.35    9.07
  17  -1  -1   -4.71    5.51
 -17  -1   1   -0.18    5.51
 -17   1   1   -0.26    7.46
 -17   1   1   -4.98   10.74
   0   0 -13    9.17   11.01
   0   0 -13    0.29    8.88
   5  -3 -13  -15.60   10.62
   5  -3 -13    0.30    9.92
   7  -3 -13   -4.70    9.47
   7  -3 -13   14.17   10.69
 -12   0  13    1.32   10.32
  -5  -1 -11   -8.11    9.50
  -5   1 -11   -8.20    8.54
  -5  -1 -11   -5.60   11.80
  -5  -1 -11   -3.94   11.53
  -5   1 -11   -7.57   12.36
   1   8   4    7.60    4.26
   1   8   4   -4.90   14.07
   1  -8   4    2.53    5.09
  -1  -8  -4   -1.64    8.75
  -1   8  -4   10.77    5.85
  -2   2 -12   60.10   13.64
  -2  -2 -12   83.19   13.29
  -2   2 -12   76.95   10.65
  -2   2 -12   91.78   14.13
  -2  -2 -12   71.02   11.72
  -5   7  -5   16.05   10.60
   5  -7   5   17.33    6.30
  -5  -7  -5   17.59    8.51
  -5  -7  -5   22.91    5.87
  -5   7  -5   22.39    7.06
  -5  -7  -5    7.32    9.25
 -10   0  -8    1.12   12.41
  10   0   8   17.71    7.09
  -5  -8  -1   22.06    7.05
   5  -8   1   18.38    6.12
  -5   8  -1   32.43   11.87
  -5   8  -1   16.59    6.36
  -8   2  -9   44.41   14.64
  -8  -2  -9   83.13   13.87
  -8  -2  -9   59.39   10.78
  -8  -2  -9   55.86   12.36
  -8   2  -9   76.49    9.78
  10   7  -4   -0.71    4.21
 -10   7   4   -0.64    4.77
 -10   7   4   11.53   13.65
  13  -5   1    2.28    6.92
 -13   5  -1    5.94   11.68
 -13  -5  -1    4.62    7.28
 -13   5  -1   -0.55    9.08
   8  -5 -11   -5.96   10.44
  -8   5  11   -1.14   16.98
   9  -6  -9   36.17   11.33
   9   6  -9   53.45    6.66
  -6   8   2    1.88    4.82
  -6   8   2  -10.29   12.70
   6  -8  -2    3.61    6.98
   6   8  -2   -6.97    4.86
  -4   5  -9   57.96    9.28
  -4  -5  -9   40.16    8.28
   4  -5   9   42.21    7.30
  -4  -5  -9   41.96   10.26
  -4  -5  -9   66.18   11.75
  -4   5  -9   42.89    8.48
 -17   2   2   52.34   11.18
 -17   2   2   23.50   10.17
 -17  -2   2   37.06    6.24
 -17  -2   2   52.33    9.14
  17  -2  -2   42.53    7.23
  -3   0 -12   -8.68   11.88
  -3   0 -12    7.06    8.57
  -3   0 -12    5.07   11.16
  -4  -4 -10    2.51    9.53
  -4   4 -10    0.44    6.97
   4  -4  10    2.85    6.06
  -4  -4 -10   -0.72    8.25
  -4  -4 -10   12.88   11.42
  -4   4 -10    0.28    8.98
  -9   6  -4    3.39    7.55
  -9  -6  -4    1.04    8.14
  -9  -6  -4    7.51    7.64
   9  -6   4   20.16    6.85
  -9   6  -4   -3.81   11.13
  -9  -6  -4    4.46    6.62
 -10  -3  -7  116.27   14.85
 -10   3  -7  114.56   12.71
 -10   3  -7   90.34   16.13
 -10  -3  -7  122.33   12.98
 -10  -3  -7  102.15   14.29
   6   8  -1   18.76    5.18
  -6   8   1   19.68    5.46
  -6   8   1   19.25   12.88
   6  -8  -1   15.94    6.86
   3   8   3   90.48    8.74
  -3  -8  -3   87.62   11.34
   3  -8   3   73.17    9.23
  -3   8  -3   71.23   13.46
   2  -5 -11    2.83    9.95
   2  -5 -11    7.71   10.68
  -2  -5  11    4.18    4.88
   2   5 -11    1.73    6.47
  -9   7   6   26.23   15.12
  -9   7   6   38.96    5.76
   9   7  -6   48.84    6.15
   9  -7   1  145.72   15.32
  -9  -7  -1  185.91   14.99
  -9   7  -1  150.84   19.48
  -9   7  -1  157.42   15.61
  -5   8   4   15.00    5.02
  -5   8   4   23.61   14.11
   5  -8  -4    8.42    8.47
   5   8  -4   14.08    5.41
   9  -4 -12   -4.20   10.12
  -9   4  12    1.10   15.85
  15   0   3   -3.12    6.25
 -15   0  -3   -0.73   12.15
 -15   0  -3   -1.57    6.61
  -6  -4  -9   39.58    9.88
  -6  -4  -9   21.91    9.15
  -6  -4  -9   32.85   11.29
  -6   4  -9   25.78    7.98
  -6   4  -9   20.93   10.11
   6  -4   9   29.66    7.08
   2  -4 -12   18.45   10.06
   2   4 -12   -0.21    6.48
   2  -4 -12   -4.62   10.71
 -11   5  10  102.34   17.82
  11  -5 -10  100.11   13.18
 -14  -5   1  145.89   13.42
 -14   5   1  112.99   14.93
  14  -5  -1  133.96   13.26
  -8  -6  -5    1.23    7.70
  -8  -6  -5    1.29    6.81
  -8  -6  -5   -2.81    8.45
  -8   6  -5    2.13   10.49
   8  -6   5    0.19    6.21
 -13  -4  -3    7.70    6.98
 -13  -4  -3    1.72    8.74
  13  -4   3   21.34    6.76
 -13   4  -3   16.91    9.89
 -13   4  -3   18.95   12.32
   4  -3 -13  312.34   27.41
   4  -3 -13  296.92   27.50
   9  -4   7   21.19    7.04
  -9  -4  -7   17.25    8.69
  -9   4  -7   27.03   11.25
  -9   4  -7   18.57    8.16
  -9  -4  -7   16.04   10.24
  -9  -4  -7   12.33    9.42
   8  -3 -13   81.22   11.92
   8  -3 -13   81.82   12.67
  10  -6   3   90.04   10.22
 -10   6  -3   81.14   10.97
 -10   6  -3   98.14   14.69
 -10  -6  -3   54.72   10.95
 -10  -6  -3   98.44   10.39
 -10  -6  -3   70.95   10.38
   6   0 -14    0.25    8.84
   6   0 -14   -3.39    9.46
  15  -4  -8    8.23    7.03
 -15   4   8   12.94   12.18
   4   7  -8    8.69    5.76
   4  -7  -8    8.60   10.30
  -4   7   8    2.84   15.96
  -4   7   8    6.46    3.51
 -18   0   5    2.92    6.75
 -18   0   5   -7.42    6.67
  -7  -1 -10  133.96   14.54
  -7   1 -10  143.54   14.23
  -7  -1 -10  138.18   17.02
  -7  -1 -10  131.83   17.27
  -7   1 -10  105.24   17.20
  -6   8   3   -3.81    4.72
   6  -8  -3    0.23    7.61
   6   8  -3    3.50    4.95
  -6   8   3   -8.39   13.59
 -10   7   1   76.51   15.23
 -10   7   1   65.17    9.03
  10  -7  -1   72.03    9.20
  -3   7   8    9.72   16.47
   3  -7  -8    9.12   10.50
   3   7  -8    8.84    5.63
  -3   7   8    9.96    3.55
  -1   6  -9    4.70    6.87
   1  -6   9   -2.56    5.11
  -1  -6  -9   12.48    9.74
  -1  -6  -9   12.91   10.47
 -14   1  12   -0.64    9.94
  -6  -5  -8    4.83   10.58
  -6  -5  -8   -2.36    7.74
  -6   5  -8   -6.90    7.69
  -6   5  -8    3.40    8.04
  -6  -5  -8   10.14    9.20
   6  -5   8   -2.07    6.08
   0   1 -13    3.73    8.49
   0  -1 -13   -0.30    9.51
   0  -1 -13    5.81   10.85
   0   1 -13    0.72   10.94
 -12   1  13    0.39   11.74
 -10  -1  -8   17.05   11.98
 -10   1  -8    0.37   12.41
 -10   1  -8    8.66    7.60
 -10  -1  -8    4.51    8.01
  10  -1   8    6.04    7.02
  -8   7   7   40.02   15.90
   8   7  -7   41.10    6.52
   1  -2 -13   43.14   11.09
   1   2 -13   58.36    9.22
   1   2 -13   34.68   11.16
   1  -2 -13   52.89   12.50
  14  -5  -7   43.04    8.68
 -14   5   7   53.37   14.41
   5  -6 -10   24.61   11.44
  -5   6  10   33.87   17.33
   5   6 -10   22.65    6.18
 -12   6   0   23.97    7.64
  12  -6   0   33.03    7.59
 -12   6   0   33.04   13.19
 -12  -6   0   43.54    7.50
  11  -2 -13   29.03    9.54
 -11   2  13   14.29   14.06
  -3   1 -12  315.83   26.05
  -3  -1 -12  317.11   28.09
  -3  -1 -12  255.04   27.00
  -3   1 -12  288.01   27.84
  -3   1 -12  276.30   27.72
  -3  -1 -12  314.59   26.67
   5  -7  -8   12.71   10.66
  -5   7   8    4.46   16.36
  -5   7   8   16.00    3.95
   5   7  -8   17.95    5.74
   4  -6 -10   40.07   12.32
   4  -6 -10   45.74   10.37
   4   6 -10   41.57    7.14
 -12   3  12   65.21   16.28
  12  -3 -12  111.46   12.87
 -18   0   6   84.96   10.82
   5   0 -14  470.97   39.84
   5   0 -14  474.23   39.34
 -18   0   4    2.55    7.19
 -18   0   4    2.37    6.59
 -12   4  11  106.47   17.73
  12  -4 -11  107.59   13.48
  -6   8   0    6.22   12.07
   6   8   0    0.76    4.70
  -6   8   0    7.11    5.70
   6  -8   0    2.58    6.25
  -2   8   5  159.76   20.14
   2   8  -5  104.42   12.64
   2  -8  -5  128.29   15.39
  -2   8   5  153.73   12.09
 -10  -5  -5   -5.28    8.62
 -10   5  -5   -5.56    9.31
  10  -5   5   -1.59    6.62
 -10  -5  -5   -4.52    8.90
 -10  -5  -5    2.23    7.95
  -2  -5 -10   -8.24   10.43
  -2   5 -10    3.73    6.99
  -2   5 -10   -0.41    6.86
  -2  -5 -10    6.93   10.01
   2  -5  10   -0.17    5.69
 -14  -3  -3    4.16   13.08
 -14   3  -3   -8.66    9.92
 -14   3  -3   -7.21   13.81
  14  -3   3    1.59    7.74
  -3   8   5   28.39    5.23
   3  -8  -5   54.73   10.20
  -1  -3 -12  186.68   19.18
  -1   3 -12  173.25   16.30
  -1   3 -12  142.42   17.52
  -1  -3 -12  179.37   17.96
 -17   2   8   -3.95    9.93
 -11  -5  -4   35.94    8.87
 -11  -5  -4   53.48    9.66
 -11   5  -4   56.61   10.87
 -11   5  -4   52.40   11.83
   2  -7  -8    4.12   10.37
   2   7  -8    5.27    6.00
  -2   7   8  -16.02   17.12
  -2   7   8    1.76    3.52
  11  -6  -8   37.07    9.59
  11   6  -8   33.49    4.96
 -15  -1  -3   -0.21    6.51
 -15   1  -3   16.79    7.64
 -15  -1  -3   -7.01   10.67
  15   1   3    9.61    6.10
  15  -1   3    6.70    6.26
 -15   1  -3   12.18   12.46
  10   7  -5   19.87    4.74
 -10   7   5    9.46   14.32
  10  -7  -5   12.09    8.27
 -10   7   5   15.82    5.02
 -12  -2  -6   52.52   12.11
 -12  -2  -6   39.79    8.65
  12  -2   6   40.89    7.80
 -12   2  -6   30.76   14.35
 -12  -2  -6   30.72   11.84
   6  -6 -10   14.27   11.26
  -6   6  10   23.74   17.85
   6   6 -10   35.17    6.08
 -16   4   4   -7.64   12.70
 -16  -4   4   -7.93    5.76
  16  -4  -4    4.09    6.19
 -16   4   4    2.98    9.48
  16  -4  -5   22.84    7.14
 -16  -4   5   45.41    6.44
 -16   4   5   47.16   13.45
 -17   1   9   -3.06    8.60
 -13  -2  -5    3.54    7.10
  13  -2   5    2.65    6.43
 -13  -2  -5    0.34   10.97
  13   2   5    1.30    6.18
   1  -8  -5   89.87   12.68
  -1   8   5   96.58   17.19
  -1   8   5   99.04    8.81
   1   8  -5   73.14    9.62
  -2  -8  -4   19.47    8.71
  -2   8  -4   18.06    6.21
   2   8   4   24.05   14.79
   2   8   4   13.96    4.74
   6  -1 -14   70.25   12.42
   6  -1 -14   74.97   11.81
   3   6 -10   43.14    7.15
  -3   6  10   24.47    4.09
  -2   4 -11    9.08    8.48
   2  -4  11    3.68    6.06
  -2   4 -11   12.60    7.44
   7  -1 -14   55.62   11.69
   7  -1 -14   56.31   11.15
 -18   1   5    8.24    7.32
 -18  -1   5   10.58    6.28
   9  -5 -11   82.54   12.88
  -9   5  11   62.53   18.15
  -7  -6  -6    2.72    9.17
  -7   6  -6    9.13    9.47
  -7   6  -6   20.01    8.03
   7  -6   6    3.56    6.34
  -7  -6  -6    8.07    6.92
  -7  -6  -6    0.53    8.37
  15  -3 -10   55.97    8.92
 -15   3  10   31.98   12.92
 -17  -3   5    1.70    5.28
 -17   3   5    2.71   10.93
  17  -3  -5    1.04    6.02
   3  -3 -13  140.07   16.40
   3  -3 -13  151.91   16.93
  -4   8   5   43.44    5.87
   4  -8  -5   61.87   10.41
   9  -3 -13    7.09   10.36
   9  -3 -13   13.07    8.52
  15  -4   0   28.83    7.24
 -15  -4   0   22.02    8.28
 -15   4   0   19.91   11.55
 -15   4   0    7.32   11.54
  12   6  -7    3.97    3.60
  12  -6  -7   12.84    8.19
 -13   6   4    5.25    5.71
 -13  -6   4   10.02    4.99
  13  -6  -4    2.07    6.87
  -9   5  -6   46.38   10.86
  -9   5  -6   50.92   10.27
  -9  -5  -6   13.54   11.07
  -9  -5  -6   43.08    9.80
   9  -5   6   53.95    8.11
  -9  -5  -6   71.63   10.22
   6   7  -8    2.46    5.18
  -6   7   8    8.04   15.47
 -11   6  -2    3.45   11.80
 -11  -6  -2    0.38    6.50
 -11  -6  -2    0.21    7.01
 -11  -6  -2    5.06    6.98
 -11   6  -2   -3.66    7.79
   1  -5 -11   57.12   12.15
   1  -5 -11   53.57   11.74
  -1  -5  11   53.82    7.12
   1   5 -11   50.96    8.59
  -4   7  -6   18.82    6.97
  -4   7  -6   15.14    9.86
  -4  -7  -6   14.80    5.45
  -4  -7  -6   12.36    9.99
   4  -7   6   17.89    5.91
  -4  -7  -6   -4.14    8.79
 -13  -6   3   27.56    5.96
  13  -6  -3    7.84    6.88
 -13   6   3   17.61    6.46
 -17   3   4   19.92   11.96
  17  -3  -4   46.69    7.38
 -17  -3   4   46.52    7.50
 -17   3   4   26.57   10.43
  -2   7  -7  356.51   33.09
  -2  -7  -7  472.80   34.82
  -2  -7  -7  394.19   32.48
  -2  -7  -7  452.13   34.25
 -18  -1   6   14.86    5.58
 -18   1   6    6.80    8.91
  -9  -3  -8   45.90   10.83
  -9   3  -8   20.87   13.73
  -9  -3  -8   39.41    9.63
  -9   3  -8   30.44    8.82
  -9  -3  -8   54.07   12.06
   5  -1 -14   28.79    9.98
   5  -1 -14   55.01   11.04
   4   0 -14   27.14    9.38
   4   0 -14   16.47   10.34
 -16  -2  -1  -13.49   10.06
 -16   2  -1    7.17   11.78
 -16   2  -1    5.03    8.46
  16  -2   1    8.57    6.17
 -18   1   4   -0.45    8.03
 -18   1   4    0.29    8.27
 -18  -1   4    2.55    6.97
   8  -1 -14   97.20   12.62
   8  -1 -14   79.87   12.85
 -15   2  11    0.36   10.68
 -11  -2  -7    7.77   10.76
 -11  -2  -7   30.61    8.42
 -11  -2  -7   21.12   11.86
 -11   2  -7   -2.59   13.90
  11  -2   7   13.98    7.30
 -11   2  -7   33.65    8.13
  -6   8   4   29.20   15.04
   6  -8  -4    9.83    8.23
  -6   8   4   11.29    4.91
   6   8  -4   15.40    5.19
  16  -4  -3  247.63   21.71
 -16   4   3  254.83   25.23
 -16   4   3  203.07   23.35
 -16  -4   3  276.13   21.71
 -14   3  11    6.22   11.77
  14  -3 -11    1.61    8.06
 -12   5  -3   -4.18    9.84
 -12   5  -3    2.34   10.76
 -12  -5  -3    2.56    7.93
 -12  -5  -3   -2.35    6.98
 -12  -5  -3   -0.26    8.01
  12  -5   3    4.47    6.89
  -5   8  -2   86.88   14.76
  -5   8  -2   89.34    9.90
   5  -8   2   86.74    9.64
  -5  -8  -2   80.73   10.57
   5   8   2   78.96    8.65
  17   0   0   -0.66    5.80
 -17   0   0    2.24   10.30
 -17   0   0   11.45    6.55
 -16   4   6   62.33   13.83
 -16  -4   6   69.82    7.46
  16  -4  -6   74.69    9.10
 -18   0   3   -1.94    6.53
 -18   0   3   -6.23    8.29
   7  -6 -10   52.42   12.28
   7   6 -10   62.23    7.51
  -7   6  10   51.13   18.43
 -10   4  12  128.28   20.53
  10  -4 -12  147.51   16.06
  -1   7   8    7.00    3.64
   1  -7  -8   -8.67    8.86
   1   7  -8    9.66    6.61
   1  -7  -8    4.93   10.95
   9   0   9   -7.17    6.89
  -9   0  -9   -3.39   12.89
  -9   0  -9   -8.36    8.20
  17  -3  -6    5.38    6.02
 -17   3   6    1.97   11.06
 -17  -3   6   10.10    4.80
   0   8   5   44.64    5.75
   0  -8  -5   17.75   10.45
   0   8   5   27.76   16.42
   0  -8   5   22.85    5.96
   0   8  -5   27.67    6.97
  14   2   4   33.30    6.79
 -14   2  -4    1.83   13.24
  14  -2   4   16.39    6.80
 -14  -2  -4   21.52    7.21
 -14   2  -4   37.26    8.49
   1  -4 -12  111.45   15.43
   1   4 -12   95.60   12.19
   1  -4 -12  131.18   14.45
  13   6  -5   48.14    5.66
  13  -6  -5   39.99    8.52
 -10   7   0   11.04   13.19
  10  -7   0   15.92    7.18
 -10   7   0   25.70    7.17
   4  -8   3  153.15   14.23
  -4   8  -3  135.90   14.57
  -4   8  -3  110.82   17.72
   4   8   3  169.35   13.69
   2   6 -10    6.65    6.29
  10  -6  -9    3.96   10.03
  10   6  -9   14.15    4.59
 -14  -4  -2   11.91    8.61
 -14  -4  -2    0.81    8.20
 -14  -4  -2   -0.59    6.41
  14  -4   2   10.28    6.63
 -14   4  -2   -5.63   12.19
 -17   2   1   32.61   11.88
 -17  -2   1   38.64    9.72
 -17  -2   1   48.49    6.80
  17  -2  -1   45.85    7.41
 -17   2   1   37.63   10.09
  -8  -4  -8   13.58    9.33
  -8  -4  -8   24.24    9.73
  -8  -4  -8   31.33   11.40
  -8   4  -8   16.54    8.03
  -8   4  -8   30.61   11.33
   8  -4   8   12.32    6.94
  -4   6  -8   13.92    7.85
  -4  -6  -8   -1.21    9.58
  -4  -6  -8    6.67    6.34
   4  -6   8    2.95    5.70
  -4   6  -8   -3.65    7.77
  -4  -6  -8    2.28   10.13
   7   8  -2   -1.25    4.78
  -7   8   2    3.28    5.30
   7  -8  -2   -7.74    7.43
  -7   8   2    2.76   12.83
  -5   2 -11   -1.32   12.96
  -5  -2 -11   16.14    9.28
  -5  -2 -11    8.00   10.25
  -5   2 -11   18.41    8.08
  -5  -2 -11    6.15   11.64
   5  -2  11    9.52    7.07
  16  -3   0   38.18    8.00
 -16  -3   0   62.88   10.38
 -16   3   0   57.26   11.96
 -16  -3   0   57.94    7.48
 -16   3   0   53.46   12.92
  -8   7  -3    2.02    7.04
  -8  -7  -3    1.97    8.24
  -8   7  -3    7.06   11.82
  -8  -7  -3    8.49    6.19
   8  -7   3    3.68    6.49
  -8  -7  -3   10.08    7.44
  -4   3 -11   -7.69   11.77
  -4   3 -11    9.93    7.55
   4  -3  11    9.28    6.57
  -4  -3 -11   10.91    9.05
  -4  -3 -11   -5.01   11.47
  -4  -3 -11   -2.51    9.87
  -7   7  -4   -6.10    7.30
  -7  -7  -4   -2.73    6.00
  -7   7  -4   -1.96   11.06
   7  -7   4   -2.16    6.56
  -6  -3 -10   -1.56   11.56
  -6  -3 -10    6.20    9.98
  -6   3 -10    9.97   11.80
   6  -3  10    6.75    6.75
  -6  -3 -10   -2.28    9.18
  -6   3 -10   -7.38    7.52
 -13   6   2   -3.78   13.68
 -13  -6   2   -6.30    5.89
  13  -6  -2   -0.20    6.83
 -13   6   2    1.12    6.60
   6  -8   1   -1.11    6.22
  -6   8  -1   -1.71   12.62
  -6   8  -1    2.99    6.18
  -5   8   5  241.25   19.51
   5   8  -5  238.80   20.05
   5  -8  -5  209.66   21.33
  -5   8   5  188.09   24.38
   4   1 -14   22.92   10.64
   4  -1 -14   29.35    9.68
   4  -1 -14    9.19   10.47
   4   1 -14   17.15    8.98
 -17   3   3   23.87   11.52
 -17  -3   3   13.61    7.05
  17  -3  -3   15.50    6.54
 -17   3   3    0.27   10.63
  13  -5  -9  108.66   12.93
 -13   5   9  103.42   17.52
  -1   0 -13    4.27   11.40
  -1   0 -13   -9.41    9.20
 -16   3   9   14.59   11.43
  16  -3  -9   10.93    6.50
  16   0   2    2.15    6.11
 -16   0  -2    4.70    6.52
 -16   0  -2   13.32   11.97
  -7   8   1    2.21   13.08
   7   8  -1   15.10    4.97
  -7   8   1    8.90    5.69
   7  -8  -1    4.46    6.93
   7  -8  -3  196.76   18.57
  -7   8   3  210.44   17.32
   7   8  -3  198.36   17.26
  -7   8   3  181.65   22.59
 -18   1   7   -8.56    8.79
 -17   1   0    6.06   11.41
  17  -1   0   -3.31    6.01
 -17   1   0    0.52    7.23
 -17  -1   0   -0.30    9.64
 -17  -1   0    3.60    5.73
 -14   5   0   -4.21    9.90
 -14  -5   0   -1.14    7.07
  14  -5   0    3.31    6.83
 -18  -1   3   60.24   10.06
 -18   1   3   66.36   10.19
 -18   1   3   59.55   11.05
 -18  -1   3   71.52    8.24
  -7   7   8   44.49   16.97
   7   7  -8   44.06    6.99
 -15   5   4   -7.54    9.03
 -15  -5   4   -3.21    5.63
 -15   5   4    6.01   13.00
  15  -5  -4   -0.79    6.63
  -9  -1  -9   -1.49   12.22
  -9   1  -9   -3.27    8.03
   9  -1   9   -7.21    7.24
  -9   1  -9    3.31   13.17
  -8  -5  -7   87.98   11.13
   8  -5   7   69.44    8.99
  -8  -5  -7   29.70   12.54
  -8  -5  -7   79.05   10.75
  -8   5  -7   56.15   11.66
  -8   5  -7   65.05   10.73
   3   0 -14   -0.34   10.23
   3   0 -14   -8.96    8.87
   9  -7  -7   -4.30    9.35
   9   7  -7    6.44    4.72
  -9   7   7  -10.90   14.79
  -2  -6  -9    3.39   10.40
  -2  -6  -9   -8.03    9.87
  -2  -6  -9    0.83    5.72
   2  -6   9    7.67    5.46
  -2   6  -9    7.09    7.37
   2  -3 -13   -6.04   10.05
   2  -3 -13   -4.36   10.79
  -7   2 -10   30.42    8.62
   7  -2  10   28.80    7.47
  -7  -2 -10   21.25   11.05
  -7   2 -10   14.37   13.92
  10  -3 -13  208.95   19.06
 -10   3  13  127.55   22.58
 -15   5   5  177.66   23.17
 -15  -5   5  238.39   18.67
  15  -5  -5  202.14   19.53
  14  -4 -10   14.57    8.59
 -14   4  10   -9.10   13.09
 -10   7   6   10.84   14.36
  10  -7  -6   -5.50    8.48
  10   7  -6   -1.18    4.47
  15  -3   2   79.87    9.33
 -15  -3  -2   88.59    9.48
 -15   3  -2   77.41   12.25
 -15   3  -2   60.36   14.62
 -15  -3  -2   70.60   11.83
 -15  -3  -2   32.24   11.81
  -9   7  -2    0.44   12.54
  -9  -7  -2   -6.33    5.90
   9  -7   2   -4.62    6.73
  -9   7  -2   -6.26    7.31
 -14   2  12   -2.28   11.02
   0   2 -13    0.77    8.23
   0  -2 -13   -0.63   10.19
   0  -2 -13    5.39   11.49
   0   2 -13   -3.19   11.13
   3  -8   4    5.18    5.81
   3   8   4   15.41    4.75
  -3  -8  -4   -3.21    8.79
 -12   2  13    1.77   12.71
 -10   2  -8   32.83   14.14
 -10  -2  -8   21.99    8.62
 -10  -2  -8   31.40   12.01
 -10   2  -8   25.71    8.16
 -10  -2  -8    1.35   10.84
  10  -2   8   18.09    7.36
  -6  -7  -5  122.18   12.30
  -6   7  -5   90.67   14.22
   6  -7   5  100.14   10.68
  -6  -7  -5  105.02   10.33
   8  -6 -10   15.46   11.04
   8   6 -10    0.32    4.69
   1   8   5  469.33   34.03
   1   8   5  444.38   39.00
   1  -8   5  346.67   34.00
  -1   8  -5  416.09   34.59
  -1  -8  -5  448.09   35.85
  -6   6  -7    5.98    8.69
  -6  -6  -7    1.68    6.62
  -6  -6  -7    0.57    8.53
   6  -6   7   -0.56    5.92
  -6   6  -7    6.24    7.88
  -6  -6  -7   -0.32    9.34
 -17   3   7    0.78   10.71
  17  -3  -7    5.47    6.02
 -17  -3   7   -1.93    3.96
  16  -4  -2   30.33    7.56
 -16   4   2   20.31   12.95
 -16  -4   2   42.99    7.82
 -16   4   2   37.68   12.06
 -10   5  11   86.63   18.00
  10  -5 -11   71.10   12.97
  -3  -2 -12   57.70   12.21
  -3   2 -12   52.82   12.63
  -3  -2 -12   43.44   10.52
  -3   2 -12   23.29   12.72
  -3   2 -12   32.50    8.95
 -15   5   3   -1.83   12.79
  15  -5  -3   17.45    6.94
 -15  -5   3    8.13    5.70
 -15   5   3    2.38    9.60
 -14   5   8   24.93   14.04
  14  -5  -8   27.24    8.23
  12  -5 -10   -9.62    9.53
 -12   5  10   10.48   14.23
 -11   7   3   49.51   14.91
  11   7  -3   75.97    7.65
 -11   7   3   48.89    8.15
   0  -7   8   -0.94    4.82
   0   7  -8   -0.68    6.51
   0  -7  -8   13.66   10.57
   0  -7  -8    1.16    9.31
 -16  -4   7   30.76    4.99
  16  -4  -7   28.61    7.16
 -16   4   7   13.15   12.09
  -1   1 -13   10.45    8.80
  -1  -1 -13   16.78   11.41
  -1  -1 -13    7.65    9.51
  -1   1 -13   17.05   11.83
 -16   1  -2   33.38    8.25
  16   1   2   39.72    7.36
  16  -1   2   38.73    7.21
 -16  -1  -2   40.65    7.25
 -16   1  -2   22.71   12.86
 -16  -1  -2   38.55   11.47
 -13   1  13    9.64   11.08
  13  -6  -6   31.51    8.33
  13   6  -6   44.15    5.41
 -12   6  -1   -0.80    7.48
 -12   6  -1    3.20   12.59
 -15   4   9   19.19   12.57
  15  -4  -9   15.15    7.85
  -1  -6  10    9.56    5.11
   1  -6 -10   19.56   11.41
   1   6 -10    5.94    6.60
   1  -6 -10    0.98   10.04
 -13   5  -2   18.26   12.58
 -13  -5  -2    4.32    6.87
 -13   5  -2    1.52   10.20
 -13  -5  -2    0.72    7.89
  13  -5   2   13.86    7.69
  -6   0 -11   17.78   12.28
  -6   0 -11   -8.11    8.70
  -6   0 -11   -7.46   12.34
   0  -5  11   88.03    9.57
   0   5 -11   89.97   10.85
 -15   2  -3   12.33   13.18
 -15   2  -3   25.21    8.90
 -15  -2  -3    0.67   11.00
 -15  -2  -3   12.60    6.85
  15   2   3   18.19    6.46
  15  -2   3   18.26    6.76
 -11   7   4    6.42   13.90
  11   7  -4   20.71    4.76
  11  -7  -4   11.93    7.53
 -11   7   4   14.09    5.70
  -5   5  -9   45.51    9.83
  -5  -5  -9   53.26    9.50
  -5   5  -9   56.69    9.18
  -5  -5  -9   66.42   11.33
  -5  -5  -9   48.18   12.24
   5  -5   9   45.68    7.78
  -7   8   0  118.79   12.44
   7  -8   0  110.44   12.70
   7   8   0  141.99   11.79
  -7   8   0  114.06   17.26
 -17   2   9   -5.77    9.79
 -11   7   2    5.20   13.47
 -11  -7   2   11.78    5.74
 -11   7   2    7.25    6.16
 -18   0   2   67.78   11.15
 -18   0   2   64.69    9.16
 -16   1  11   26.09   10.01
   6  -2 -14  119.51   15.48
   6  -2 -14  134.26   15.16
   3  -1 -14   69.37   12.16
   3   1 -14   59.09   11.73
   3   1 -14   56.27   10.25
   3  -1 -14   38.15   10.76
   7  -2 -14  109.02   15.86
   7  -2 -14  150.46   15.53
  -7   8   4   12.10    4.98
   7  -8  -4   13.50    8.41
  -7   8   4    7.44   14.21
   7   8  -4    7.85    4.83
   6  -8  -5  132.58   15.39
  -6   8   5  116.70   19.65
   6   8  -5  150.85   13.53
  -6   8   5  147.75   12.89
 -13   3  12    6.29   12.88
  13  -3 -12   23.97    9.23
  18  -2  -5   21.98    6.24
 -18   2   5   10.71   10.55
 -18  -2   5   22.07    6.34
  -4   0 -12    3.86    8.69
  -4   0 -12   14.74   11.47
  -4   0 -12  -14.34   11.91
   5  -4  10   54.76    8.41
  -5  -4 -10   75.69   11.67
  -5  -4 -10   63.50   12.93
  -5   4 -10   55.90   11.80
  -5  -4 -10   45.02   10.30
  -5   4 -10   48.61    9.04
  13  -6  -1   74.09    9.55
 -13  -6   1   79.54    9.17
 -13   6   1   60.40   14.43
 -13   6   1   62.07   10.00
 -15   5   6   -2.29   12.93
  15  -5  -6   10.91    6.95
 -15  -5   6    0.14    4.84
  -3   5 -10   30.76    7.77
  -3   5 -10   29.42    8.42
  -3  -5 -10   26.96    7.74
  -3  -5 -10   31.42   11.01
  -3  -5 -10   42.44   10.65
   3  -5  10   33.24    6.93
  -2   3 -12    4.59    7.86
   2  -3  12   -8.76    6.54
  -2  -3 -12   -0.98    9.70
  -2  -3 -12  -12.00   12.36
  -2   3 -12   15.18   11.31
   8  -3   9    5.63    6.86
  -8   3  -9  -16.66   13.14
  -8  -3  -9   -8.19    9.16
  -8  -3  -9   10.42   11.59
  -8  -3  -9    5.29    9.66
  -8   3  -9    5.34    7.55
 -13   4  11   25.82   13.70
  13  -4 -11   35.63    9.57
  11  -4 -12   60.93   11.83
 -11   4  12   62.71   16.12
  17  -3  -2  103.04   11.10
 -17   3   2   74.32   13.96
 -17  -3   2  105.49   12.02
 -17   3   2  106.97   14.60
  -3  -7  -7   -3.26    9.17
  -3  -7  -7   -1.70   10.03
   3  -7   7    4.40    5.65
  -3   7  -7   -1.44    6.73
  -3  -7  -7   -1.51    5.25
 -18  -2   6   88.16    8.80
 -18   2   6   52.64   12.86
   5  -2 -14   99.45   13.75
   5  -2 -14   87.24   13.94
 -18   2   4    9.99    9.20
  18  -2  -4   12.43    6.32
 -18   2   4   14.91   10.29
 -18  -2   4   13.74    6.83
   0  -4  12    8.43    5.63
   0  -4 -12   14.48    9.91
   0  -4 -12   -7.14   11.12
   0   4 -12    3.31    8.02
   8  -2 -14   11.27    9.71
   8  -2 -14   -1.94   10.82
   3  -8  -6   14.05   10.31
  -3   8   6   25.46   15.84
   3   8  -6   16.53    6.08
  -3   8   6   26.10    4.54
  13   0   6   37.61    8.26
 -13   0  -6   60.70   14.10
 -13   0  -6   49.36    9.11
  -6  -1 -11   10.03    9.29
   6  -1  11    0.66    7.05
  -6  -1 -11   22.10   12.50
  -6   1 -11   11.12    8.59
  -6   1 -11   -2.81   12.96
  -6  -1 -11    5.24   11.97
  -2   8   6   -0.53   15.29
   2  -8  -6   -0.64   10.25
  -2   8   6    2.25    4.05
   2   8  -6    0.82    6.32
  -8   7   8   10.34   15.59
   8   7  -8   15.89    6.02
   8  -7  -8   19.61   10.32
 -15   1  12   20.14   10.37
 -12   6   8   96.64   17.83
  12  -6  -8   97.89   12.96
  12   6  -8  107.85    9.61
 -18   1   8   -5.57    8.84
 -10   7  -1   21.82    7.31
 -10  -7  -1   10.28    5.77
  10  -7   1    3.10    7.15
 -10   7  -1    3.62   12.64
 -15   5   2    7.04   10.28
  15  -5  -2   35.22    7.79
 -15  -5   2   42.14    7.39
 -15   5   2   18.60   13.19
  -3   4 -11   13.06    9.52
  -3   4 -11   20.26    7.74
   3  -4  11   16.49    6.68
 -17   1  10   -4.04    9.22
 -18  -1   2   33.57    9.29
 -18   1   2   35.03    8.66
  18  -1  -2   38.11    6.74
 -18   1   2   29.13   10.52
 -18  -1   2   38.30    6.86
   4   8  -6   14.18    6.09
  -4   8   6   14.86    4.62
  -4   8   6   -1.04   14.97
   4  -8  -6   11.03   10.18
 -11   7   5    1.53   14.18
  11   7  -5    4.05    4.39
 -11   7   5    5.95    4.99
  11  -7  -5    4.31    7.91
   2   0 -14    0.86    9.32
   2   0 -14   -0.35   10.70
 -14   0  -5    3.64    7.55
  14   0   5   -1.04    6.77
  -4  -1 -12  -10.25    9.60
  -4  -1 -12   -1.25   11.92
  -4   1 -12    2.65   12.44
  -4  -1 -12   10.78   11.64
  -4   1 -12   -7.94    8.62
  -4   1 -12    3.40   12.27
   6  -8   2   -3.19    6.07
  -6   8  -2    1.82    6.34
  -6  -8  -2    6.97    7.81
   6   8   2    8.61    4.89
  -6   8  -2   -1.25   12.17
  -5   8  -3    9.47   11.92
  -5  -8  -3   -7.06    8.15
  -5   8  -3    0.70    6.96
   5  -8   3    0.54    5.93
  -5  -7  -6   28.58    6.59
  -5  -7  -6   19.78    9.35
  -5   7  -6   14.52   10.31
  -5   7  -6   13.50    8.03
   5  -7   6   22.79    6.58
  -5  -7  -6    4.72   10.16
  12   0   7    1.33    6.89
 -12   0  -7    8.88    8.35
 -12   0  -7   16.26   13.38
 -15   4  -1   32.80   11.94
 -15  -4  -1   38.43    9.55
  15  -4   1   31.54    7.61
 -15   4  -1   48.53   13.05
 -11   7   1   -5.25    6.66
 -11   7   1   -6.79   13.31
 -11  -7   1    2.05    5.88
 -12   4  -5   81.44   14.51
  12  -4   5   74.36    9.35
 -12   4  -5   58.49   11.17
 -12  -4  -5   73.18   11.94
 -12  -4  -5   62.38   10.64
 -12  -4  -5   30.60   12.25
  -2   8  -5   51.27    8.21
   2   8   5   43.52   16.78
   2  -8   5   43.74    7.24
  -2  -8  -5   73.97   10.73
   2   8   5   49.62    6.31
   9  -6 -10   29.12   11.27
  -8   0 -10   13.32    8.64
  -8   0 -10    3.40   12.78
  -7  -4  -9   64.86   11.27
  -7   4  -9   41.89   13.01
  -7   4  -9   53.80    9.51
  -7  -4  -9   66.82   12.74
  -7  -4  -9   71.60   11.17
   7  -4   9   61.78    8.76
   1  -3 -13   75.92   13.54
   1  -3 -13   81.97   12.70
 -10   6  -4   25.75    8.92
  10  -6   4   34.07    7.60
 -10   6  -4    9.18   11.40
 -10  -6  -4   28.55    7.58
 -10  -6  -4   13.69    8.03
 -10  -6  -4    3.98    8.53
  -1   8   6    8.94    4.17
   1  -8  -6    3.18    9.71
   1   8  -6   -0.62    6.12
  -1   8   6   22.78   15.78
  11  -6  -9   15.98    9.60
 -11   6   9   16.34   15.49
  11  -3 -13  105.95   12.92
 -11   3  13   50.36   17.18
  -7  -5  -8   -8.22    8.30
   7  -5   8    5.42    6.53
  -7   5  -8   -6.26    8.19
  -7  -5  -8   -9.38   11.01
  -7  -5  -8   -8.57    9.69
  -7   5  -8   -4.62    9.15
 -11   4  -6    3.04    8.58
 -11  -4  -6    6.23    8.11
 -11  -4  -6    1.76   10.37
 -11  -4  -6    2.45    9.60
  -9  -6  -5    9.94    7.33
   9  -6   5    9.50    6.73
  -9  -6  -5    4.88    9.01
  -9   6  -5   14.68   10.46
  -9  -6  -5    7.02    8.08
   4  -2 -14  153.44   16.93
   4  -2 -14  165.16   17.80
   9  -2 -14   48.47   11.85
   9  -2 -14   61.38   11.09
  -1  -7  -8   -8.60   10.93
   1  -7   8    0.44    5.10
  -1   7  -8   -2.09    6.73
[truncated: 100,765 more chars]
