# Supplementary material for: Rationalisation of Patterns of Competing Reactivity by X-ray Structure Determination: Reaction of Isomeric (Benzyloxythienyl)oxazolines with a Base
Source: Molecules. 2021 Dec 20;26(24):7690. doi: 10.3390/molecules26247690 (PMC8705950; doi:10.3390/molecules26247690)
Supplement: Supplementary file 1 [file molecules-26-07690-s001.zip › 21Mol supp mater/cpd 11.cif]

data_11
_audit_creation_date                               2017-10-03
_audit_creation_method                            'by CrystalStructure 4.2'

_publ_section_references
;
    ENTER OTHER REFERENCES

    Rigaku (2015). CrystalStructure. Version 4.2. 
    Rigaku Corporation, Tokyo, Japan.

    Sheldrick, G. M. (2014). Acta Cryst. (2014). A70, C1437.
    SHELXT Version 2014/4

    Sheldrick, G.M. (2008) SHELXL Version 2014/7, Acta Cryst. A64, 112-122.

    Rigaku Oxford Diffraction (2015), CrysAlisPro. version 1.171.39.8d.
    Rigaku Corporation, Tokyo, Japan

;


_chemical_formula_sum                             'C16 H17 N O2 S'
_chemical_formula_moiety                          'C16 H17 N O2 S'
_chemical_formula_weight                           287.38
_chemical_melting_point                            ?

#==============================================================================
# CRYSTAL DATA
_space_group_crystal_system                        monoclinic
_space_group_name_H-M_alt                         'P 1 21/c 1'
_space_group_name_Hall                            '-P 2ybc'
_space_group_IT_number                             14
loop_
_space_group_symop_id
_space_group_symop_operation_xyz
1   '+X,+Y,+Z'
2   '-X,1/2+Y,1/2-Z'
3   '-X,-Y,-Z'
4   '+X,-1/2-Y,-1/2+Z'
#------------------------------------------------------------------------------
_cell_length_a                                     14.8176(4)
_cell_length_b                                     8.72450(17)
_cell_length_c                                     11.9720(3)
_cell_angle_alpha                                  90.0000
_cell_angle_beta                                   113.314(3)
_cell_angle_gamma                                  90.0000
_cell_volume                                       1421.32(7)
_cell_formula_units_Z                              4
_cell_measurement_reflns_used                      11815
_cell_measurement_theta_min                        2.76
_cell_measurement_theta_max                        28.34
_cell_measurement_temperature                      93
#------------------------------------------------------------------------------
_exptl_crystal_description                         prism
_exptl_crystal_colour                              colourless
_exptl_crystal_size_max                            0.120
_exptl_crystal_size_mid                            0.100
_exptl_crystal_size_min                            0.060
_exptl_crystal_density_diffrn                      1.343
_exptl_crystal_density_meas                        ?
_exptl_crystal_density_method                     'not measured'
_exptl_crystal_F_000                               608.00
_exptl_absorpt_coefficient_mu                      0.228
_exptl_absorpt_correction_type                     multi-scan
_exptl_absorpt_process_details
;
CrysAlisPro 1.171.39.8d (Rigaku Oxford Diffraction, 2015)
Empirical absorption correction using spherical harmonics,
 implemented in SCALE3 ABSPACK scaling algorithm.
;
_exptl_absorpt_correction_T_min                    0.780
_exptl_absorpt_correction_T_max                    0.986

#==============================================================================
# EXPERIMENTAL DATA

_diffrn_ambient_temperature                        93
_diffrn_radiation_type                            'Mo K\a'
_diffrn_radiation_wavelength                       0.71075
_diffrn_measurement_device_type                   'Rigaku XtaLAB P200'
_diffrn_measurement_method                         \w
_diffrn_detector_area_resol_mean                   5.811
_diffrn_reflns_number                              15649
_diffrn_reflns_av_R_equivalents                    0.0173
_diffrn_reflns_theta_max                           28.158
_diffrn_reflns_theta_min                           2.773
_diffrn_reflns_theta_full                          25.242
_diffrn_measured_fraction_theta_max                0.896
_diffrn_measured_fraction_theta_full               1.000
_diffrn_reflns_Laue_measured_fraction_max          0.896
_diffrn_reflns_Laue_measured_fraction_full         1.000
_diffrn_reflns_point_group_measured_fraction_max   0.896
_diffrn_reflns_point_group_measured_fraction_full  1.000
_diffrn_reflns_limit_h_min                        -18
_diffrn_reflns_limit_h_max                         19
_diffrn_reflns_limit_k_min                        -11
_diffrn_reflns_limit_k_max                         11
_diffrn_reflns_limit_l_min                        -14
_diffrn_reflns_limit_l_max                         15
_diffrn_standards_number                           0
_diffrn_standards_interval_count                   .
_diffrn_standards_decay_%                          ?
_reflns_number_total                               3112
_reflns_number_gt                                  2906
_reflns_threshold_expression                       F^2^>2.0\s(F^2^)
_reflns_Friedel_coverage          0.000
_reflns_Friedel_fraction_max      .
_reflns_Friedel_fraction_full     .

#==============================================================================
# REFINEMENT DATA

_refine_special_details
;
    Refinement was performed using all reflections. The weighted 
    R-factor (wR) and goodness of fit (S) are based on F^2^.
    R-factor (gt) are based on F. The threshold expression of
    F^2^ > 2.0 sigma(F^2^) is used only for calculating R-factor (gt).
;
_refine_ls_structure_factor_coef                   Fsqd
_refine_ls_R_factor_all                            0.0293
_refine_ls_R_factor_gt                             0.0274
_refine_ls_wR_factor_ref                           0.0740
_refine_ls_wR_factor_gt                            0.0730
_refine_ls_number_restraints                       0
_refine_ls_hydrogen_treatment                      constr
_refine_ls_number_reflns                           3112
_refine_ls_number_parameters                       181
_refine_ls_goodness_of_fit_ref                     1.034
_refine_ls_weighting_scheme                        calc
_refine_ls_weighting_details
           'w = 1/[\s^2^(Fo^2^)+(0.0367P)^2^+0.6437P] where P=(Fo^2^+2Fc^2^)/3'
_atom_sites_solution_hydrogens                     geom
_atom_sites_solution_primary                       direct
_atom_sites_solution_secondary                     difmap
_refine_ls_shift/su_max                            0.001
_refine_diff_density_max                           0.32
_refine_diff_density_min                          -0.21
_refine_ls_extinction_method                       none
_refine_ls_extinction_coef                         ?

loop_
_atom_type_symbol
_atom_type_description
_atom_type_scat_dispersion_real
_atom_type_scat_dispersion_imag
_atom_type_scat_source
  'C' 'C'  0.0033 0.0016 
;
International Tables for Crystallography
(Vol. C, Tables 4.2.6.8 and 6.1.1.4)
;
  'H' 'H'  0.0000 0.0000 
;
International Tables for Crystallography
(Vol. C, Table 6.1.1.4)
;
  'N' 'N'  0.0061 0.0033 
;
International Tables for Crystallography
(Vol. C, Tables 4.2.6.8 and 6.1.1.4)
;
  'O' 'O'  0.0106 0.0060 
;
International Tables for Crystallography
(Vol. C, Tables 4.2.6.8 and 6.1.1.4)
;
  'S' 'S'  0.1246 0.1234 
;
International Tables for Crystallography
(Vol. C, Tables 4.2.6.8 and 6.1.1.4)
;

#==============================================================================
# ATOMIC COORDINATES AND THERMAL PARAMETERS

loop_
 _atom_site_label
 _atom_site_type_symbol
 _atom_site_fract_x
 _atom_site_fract_y
 _atom_site_fract_z
 _atom_site_U_iso_or_equiv
 _atom_site_adp_type
 _atom_site_occupancy
 _atom_site_site_symmetry_order  
 _atom_site_calc_flag
 _atom_site_refinement_flags_posn
 _atom_site_refinement_flags_adp
 _atom_site_refinement_flags_occupancy
 _atom_site_disorder_assembly
 _atom_site_disorder_group
S8 S 0.73179(2) 0.83116(3) 0.84389(2) 0.01648(9) Uani 1 1 d . . . . .
O1 O 0.94381(5) 0.42916(9) 0.79530(7) 0.01743(17) Uani 1 1 d . . . . .
O11 O 0.67831(5) 0.70632(9) 0.61958(7) 0.01608(16) Uani 1 1 d . . . . .
N3 N 0.80697(6) 0.43405(10) 0.61893(8) 0.01629(19) Uani 1 1 d . . . . .
C2 C 0.85227(7) 0.48848(12) 0.72522(9) 0.0136(2) Uani 1 1 d . . . . .
C4 C 0.86811(8) 0.30628(12) 0.60453(10) 0.0172(2) Uani 1 1 d . . . . .
C5 C 0.96641(8) 0.32530(14) 0.71568(11) 0.0227(3) Uani 1 1 d . . . . .
H5A H 0.9899 0.2255 0.7562 0.027 Uiso 1 1 calc R U . . .
H5B H 1.0174 0.3692 0.6911 0.027 Uiso 1 1 calc R U . . .
C6 C 0.82099(7) 0.60711(12) 0.78816(9) 0.0135(2) Uani 1 1 d . . . . .
C7 C 0.74187(7) 0.70463(12) 0.73711(9) 0.0137(2) Uani 1 1 d . . . . .
C9 C 0.83229(8) 0.75088(13) 0.95777(10) 0.0177(2) Uani 1 1 d . . . . .
H9 H 0.8570 0.7832 1.0403 0.021 Uiso 1 1 calc R U . . .
C10 C 0.87193(8) 0.63610(12) 0.91576(9) 0.0156(2) Uani 1 1 d . . . . .
H10 H 0.9283 0.5800 0.9662 0.019 Uiso 1 1 calc R U . . .
C12 C 0.60465(8) 0.82675(12) 0.59014(10) 0.0184(2) Uani 1 1 d . . . . .
H12A H 0.6373 0.9282 0.6061 0.022 Uiso 1 1 calc R U . . .
H12B H 0.5672 0.8165 0.6422 0.022 Uiso 1 1 calc R U . . .
C13 C 0.53584(8) 0.81587(12) 0.45876(10) 0.0161(2) Uani 1 1 d . . . . .
C14 C 0.55129(8) 0.90637(13) 0.37201(10) 0.0183(2) Uani 1 1 d . . . . .
H14 H 0.6077 0.9702 0.3956 0.022 Uiso 1 1 calc R U . . .
C15 C 0.48479(8) 0.90398(13) 0.25127(10) 0.0199(2) Uani 1 1 d . . . . .
H15 H 0.4956 0.9665 0.1928 0.024 Uiso 1 1 calc R U . . .
C16 C 0.40248(8) 0.81007(13) 0.21623(10) 0.0196(2) Uani 1 1 d . . . . .
H16 H 0.3570 0.8084 0.1337 0.024 Uiso 1 1 calc R U . . .
C17 C 0.38656(8) 0.71880(14) 0.30150(10) 0.0205(2) Uani 1 1 d . . . . .
H17 H 0.3304 0.6542 0.2774 0.025 Uiso 1 1 calc R U . . .
C18 C 0.45299(8) 0.72196(13) 0.42263(10) 0.0191(2) Uani 1 1 d . . . . .
H18 H 0.4418 0.6597 0.4810 0.023 Uiso 1 1 calc R U . . .
C19 C 0.88063(8) 0.32119(14) 0.48449(11) 0.0218(2) Uani 1 1 d . . . . .
H19A H 0.9210 0.2363 0.4766 0.026 Uiso 1 1 calc R U . . .
H19B H 0.8160 0.3181 0.4168 0.026 Uiso 1 1 calc R U . . .
H19C H 0.9129 0.4187 0.4830 0.026 Uiso 1 1 calc R U . . .
C20 C 0.81809(9) 0.15520(13) 0.61068(11) 0.0235(2) Uani 1 1 d . . . . .
H20A H 0.8572 0.0694 0.6014 0.028 Uiso 1 1 calc R U . . .
H20B H 0.8126 0.1473 0.6894 0.028 Uiso 1 1 calc R U . . .
H20C H 0.7523 0.1520 0.5452 0.028 Uiso 1 1 calc R U . . .

loop_
 _atom_site_aniso_label
 _atom_site_aniso_U_11
 _atom_site_aniso_U_22
 _atom_site_aniso_U_33
 _atom_site_aniso_U_23
 _atom_site_aniso_U_13
 _atom_site_aniso_U_12
S8 0.01688(14) 0.01585(14) 0.01493(14) -0.00271(9) 0.00439(10) 0.00296(9)
O1 0.0146(4) 0.0198(4) 0.0153(4) -0.0015(3) 0.0031(3) 0.0058(3)
O11 0.0157(4) 0.0172(4) 0.0129(4) -0.0005(3) 0.0032(3) 0.0052(3)
N3 0.0150(4) 0.0162(4) 0.0171(4) -0.0015(3) 0.0057(3) 0.0030(3)
C2 0.0118(4) 0.0128(5) 0.0159(5) 0.0030(4) 0.0052(4) 0.0008(4)
C4 0.0158(5) 0.0172(5) 0.0171(5) -0.0019(4) 0.0048(4) 0.0047(4)
C5 0.0179(5) 0.0256(6) 0.0206(6) -0.0062(4) 0.0034(4) 0.0077(4)
C6 0.0138(5) 0.0126(5) 0.0145(5) 0.0008(4) 0.0059(4) -0.0015(4)
C7 0.0142(5) 0.0134(5) 0.0135(5) -0.0010(4) 0.0057(4) -0.0017(4)
C9 0.0178(5) 0.0185(5) 0.0137(5) -0.0013(4) 0.0030(4) 0.0004(4)
C10 0.0148(5) 0.0149(5) 0.0156(5) 0.0007(4) 0.0044(4) -0.0007(4)
C12 0.0186(5) 0.0174(5) 0.0166(5) -0.0006(4) 0.0040(4) 0.0065(4)
C13 0.0156(5) 0.0159(5) 0.0154(5) -0.0011(4) 0.0046(4) 0.0055(4)
C14 0.0168(5) 0.0172(5) 0.0197(5) -0.0021(4) 0.0060(4) -0.0004(4)
C15 0.0230(5) 0.0199(5) 0.0168(5) 0.0006(4) 0.0079(4) 0.0007(4)
C16 0.0167(5) 0.0232(5) 0.0161(5) -0.0038(4) 0.0035(4) 0.0036(4)
C17 0.0158(5) 0.0230(6) 0.0233(6) -0.0056(5) 0.0083(4) -0.0019(4)
C18 0.0210(5) 0.0194(5) 0.0191(5) -0.0001(4) 0.0103(4) 0.0011(4)
C19 0.0205(5) 0.0254(6) 0.0203(6) -0.0003(4) 0.0090(5) 0.0055(4)
C20 0.0280(6) 0.0181(5) 0.0250(6) -0.0013(4) 0.0112(5) 0.0020(5)

#==============================================================================
_computing_data_collection
                                    'CrysAlisPro 1.171.39.8d (Rigaku OD, 2015)'
_computing_cell_refinement
                                    'CrysAlisPro 1.171.39.8d (Rigaku OD, 2015)'
_computing_data_reduction
                                    'CrysAlisPro 1.171.39.8d (Rigaku OD, 2015)'
_computing_structure_solution
                                      'SHELXT Version 2014/4 (Sheldrick, 2014)'
_computing_structure_refinement
                                      'SHELXL Version 2014/7 (Sheldrick, 2008)'
_computing_publication_material
                                          'CrystalStructure 4.2 (Rigaku, 2015)'
_computing_molecular_graphics                     'CrystalStructure 4.2'

#==============================================================================
# MOLECULAR GEOMETRY

_geom_special_details
;
 All esds (except the esd in the dihedral angle between two l.s. planes)
 are estimated using the full covariance matrix.  The cell esds are taken
 into account individually in the estimation of esds in distances, angles
 and torsion angles; correlations between esds in cell parameters are only
 used when they are defined by crystal symmetry.  An approximate (isotropic)
 treatment of cell esds is used for estimating esds involving l.s. planes.
;

loop_
 _geom_bond_atom_site_label_1
 _geom_bond_atom_site_label_2
 _geom_bond_distance
 _geom_bond_site_symmetry_2
 _geom_bond_publ_flag
S8 C9 1.7205(11) . ?
S8 C7 1.7396(10) . ?
O1 C2 1.3823(12) . ?
O1 C5 1.4471(13) . ?
O11 C7 1.3483(13) . ?
O11 C12 1.4543(12) . ?
N3 C2 1.2725(14) . ?
N3 C4 1.4888(13) . ?
C2 C6 1.4595(14) . ?
C4 C19 1.5256(15) . ?
C4 C20 1.5282(16) . ?
C4 C5 1.5445(15) . ?
C5 H5A 0.9900 . ?
C5 H5B 0.9900 . ?
C6 C7 1.3801(14) . ?
C6 C10 1.4334(14) . ?
C9 C10 1.3544(15) . ?
C9 H9 0.9500 . ?
C10 H10 0.9500 . ?
C12 C13 1.5011(15) . ?
C12 H12A 0.9900 . ?
C12 H12B 0.9900 . ?
C13 C14 1.3939(16) . ?
C13 C18 1.3946(15) . ?
C14 C15 1.3906(15) . ?
C14 H14 0.9500 . ?
C15 C16 1.3892(16) . ?
C15 H15 0.9500 . ?
C16 C17 1.3865(17) . ?
C16 H16 0.9500 . ?
C17 C18 1.3938(16) . ?
C17 H17 0.9500 . ?
C18 H18 0.9500 . ?
C19 H19A 0.9800 . ?
C19 H19B 0.9800 . ?
C19 H19C 0.9800 . ?
C20 H20A 0.9800 . ?
C20 H20B 0.9800 . ?
C20 H20C 0.9800 . ?

loop_
 _geom_angle_atom_site_label_1
 _geom_angle_atom_site_label_2
 _geom_angle_atom_site_label_3
 _geom_angle
 _geom_angle_site_symmetry_1
 _geom_angle_site_symmetry_3
 _geom_angle_publ_flag
C9 S8 C7 91.43(5) . . ?
C2 O1 C5 105.19(8) . . ?
C7 O11 C12 114.08(8) . . ?
C2 N3 C4 106.91(8) . . ?
N3 C2 O1 118.01(9) . . ?
N3 C2 C6 129.15(9) . . ?
O1 C2 C6 112.83(9) . . ?
N3 C4 C19 110.59(9) . . ?
N3 C4 C20 108.13(9) . . ?
C19 C4 C20 111.16(9) . . ?
N3 C4 C5 103.26(8) . . ?
C19 C4 C5 112.19(9) . . ?
C20 C4 C5 111.17(10) . . ?
O1 C5 C4 104.46(8) . . ?
O1 C5 H5A 110.9 . . ?
C4 C5 H5A 110.9 . . ?
O1 C5 H5B 110.9 . . ?
C4 C5 H5B 110.9 . . ?
H5A C5 H5B 108.9 . . ?
C7 C6 C10 111.09(9) . . ?
C7 C6 C2 126.60(9) . . ?
C10 C6 C2 122.31(9) . . ?
O11 C7 C6 126.08(9) . . ?
O11 C7 S8 122.16(8) . . ?
C6 C7 S8 111.76(8) . . ?
C10 C9 S8 111.92(8) . . ?
C10 C9 H9 124.0 . . ?
S8 C9 H9 124.0 . . ?
C9 C10 C6 113.79(9) . . ?
C9 C10 H10 123.1 . . ?
C6 C10 H10 123.1 . . ?
O11 C12 C13 109.98(8) . . ?
O11 C12 H12A 109.7 . . ?
C13 C12 H12A 109.7 . . ?
O11 C12 H12B 109.7 . . ?
C13 C12 H12B 109.7 . . ?
H12A C12 H12B 108.2 . . ?
C14 C13 C18 119.06(10) . . ?
C14 C13 C12 120.07(10) . . ?
C18 C13 C12 120.78(10) . . ?
C15 C14 C13 120.55(10) . . ?
C15 C14 H14 119.7 . . ?
C13 C14 H14 119.7 . . ?
C16 C15 C14 119.94(10) . . ?
C16 C15 H15 120.0 . . ?
C14 C15 H15 120.0 . . ?
C17 C16 C15 120.08(10) . . ?
C17 C16 H16 120.0 . . ?
C15 C16 H16 120.0 . . ?
C16 C17 C18 119.92(10) . . ?
C16 C17 H17 120.0 . . ?
C18 C17 H17 120.0 . . ?
C17 C18 C13 120.45(10) . . ?
C17 C18 H18 119.8 . . ?
C13 C18 H18 119.8 . . ?
C4 C19 H19A 109.5 . . ?
C4 C19 H19B 109.5 . . ?
H19A C19 H19B 109.5 . . ?
C4 C19 H19C 109.5 . . ?
H19A C19 H19C 109.5 . . ?
H19B C19 H19C 109.5 . . ?
C4 C20 H20A 109.5 . . ?
C4 C20 H20B 109.5 . . ?
H20A C20 H20B 109.5 . . ?
C4 C20 H20C 109.5 . . ?
H20A C20 H20C 109.5 . . ?
H20B C20 H20C 109.5 . . ?

loop_
 _geom_torsion_atom_site_label_1
 _geom_torsion_atom_site_label_2
 _geom_torsion_atom_site_label_3
 _geom_torsion_atom_site_label_4
 _geom_torsion
 _geom_torsion_site_symmetry_1
 _geom_torsion_site_symmetry_2
 _geom_torsion_site_symmetry_3
 _geom_torsion_site_symmetry_4
 _geom_torsion_publ_flag
C4 N3 C2 O1 4.00(12) . . . . ?
C4 N3 C2 C6 -175.01(10) . . . . ?
C5 O1 C2 N3 5.96(13) . . . . ?
C5 O1 C2 C6 -174.87(9) . . . . ?
C2 N3 C4 C19 -131.65(10) . . . . ?
C2 N3 C4 C20 106.42(10) . . . . ?
C2 N3 C4 C5 -11.46(11) . . . . ?
C2 O1 C5 C4 -12.52(11) . . . . ?
N3 C4 C5 O1 14.55(11) . . . . ?
C19 C4 C5 O1 133.65(10) . . . . ?
C20 C4 C5 O1 -101.18(10) . . . . ?
N3 C2 C6 C7 -12.17(18) . . . . ?
O1 C2 C6 C7 168.77(10) . . . . ?
N3 C2 C6 C10 167.96(11) . . . . ?
O1 C2 C6 C10 -11.09(14) . . . . ?
C12 O11 C7 C6 -177.15(10) . . . . ?
C12 O11 C7 S8 2.72(12) . . . . ?
C10 C6 C7 O11 -179.23(9) . . . . ?
C2 C6 C7 O11 0.89(17) . . . . ?
C10 C6 C7 S8 0.89(11) . . . . ?
C2 C6 C7 S8 -178.99(8) . . . . ?
C9 S8 C7 O11 179.01(9) . . . . ?
C9 S8 C7 C6 -1.10(8) . . . . ?
C7 S8 C9 C10 1.03(9) . . . . ?
S8 C9 C10 C6 -0.72(12) . . . . ?
C7 C6 C10 C9 -0.12(13) . . . . ?
C2 C6 C10 C9 179.77(10) . . . . ?
C7 O11 C12 C13 -178.23(9) . . . . ?
O11 C12 C13 C14 -96.33(11) . . . . ?
O11 C12 C13 C18 87.16(12) . . . . ?
C18 C13 C14 C15 0.42(16) . . . . ?
C12 C13 C14 C15 -176.14(10) . . . . ?
C13 C14 C15 C16 -0.41(16) . . . . ?
C14 C15 C16 C17 0.02(17) . . . . ?
C15 C16 C17 C18 0.34(17) . . . . ?
C16 C17 C18 C13 -0.32(17) . . . . ?
C14 C13 C18 C17 -0.06(16) . . . . ?
C12 C13 C18 C17 176.48(10) . . . . ?

#==============================================================================

#==============================================================================
# Additional structures and associated data_? identifiers
# should be added at this point if there is more than one 
# structure analysis in the CIF.

_shelx_res_file
;

    shelxl.res created by SHELXL-2014/7

TITL AHAA23
CELL  0.71075 14.81760 8.72450 11.97200 90.00000 113.31400 90.00000
ZERR  4 0.00040 0.00017 0.00030 0.00000 0.00300 0.00000
LATT 1
SYMM    -X, .50+Y, .50-Z
SFAC C H N O S
UNIT 64 68 4 8 4
OMIT     1   0   0
L.S. 20
FMAP 2
PLAN 5
WPDB -2
HTAB
BOND $H
CONF
LIST 4
TEMP -180.0
ACTA
SIZE 0.120 0.100 0.060
WGHT    0.036700    0.643700
FVAR       0.60298
S8    5    0.731786    0.831158    0.843892    11.00000    0.01688    0.01585 =
         0.01493   -0.00271    0.00439    0.00296
O1    4    0.943809    0.429155    0.795295    11.00000    0.01461    0.01984 =
         0.01526   -0.00147    0.00315    0.00577
O11   4    0.678311    0.706317    0.619584    11.00000    0.01575    0.01723 =
         0.01290   -0.00050    0.00316    0.00522
N3    3    0.806973    0.434046    0.618927    11.00000    0.01496    0.01625 =
         0.01711   -0.00147    0.00575    0.00301
C2    1    0.852265    0.488477    0.725223    11.00000    0.01176    0.01276 =
         0.01593    0.00299    0.00518    0.00079
C4    1    0.868114    0.306283    0.604528    11.00000    0.01577    0.01719 =
         0.01705   -0.00193    0.00476    0.00470
C5    1    0.966408    0.325302    0.715680    11.00000    0.01789    0.02564 =
         0.02063   -0.00621    0.00337    0.00771
AFIX  23
H5A   2    0.989880    0.225532    0.756161    11.00000   -1.20000
H5B   2    1.017409    0.369211    0.691127    11.00000   -1.20000
AFIX   0
C6    1    0.820990    0.607112    0.788157    11.00000    0.01378    0.01264 =
         0.01449    0.00076    0.00594   -0.00150
C7    1    0.741872    0.704634    0.737110    11.00000    0.01421    0.01340 =
         0.01354   -0.00095    0.00568   -0.00172
C9    1    0.832289    0.750879    0.957775    11.00000    0.01784    0.01849 =
         0.01373   -0.00134    0.00297    0.00037
AFIX  43
H9    2    0.857023    0.783189    1.040261    11.00000   -1.20000
AFIX   0
C10   1    0.871926    0.636103    0.915761    11.00000    0.01478    0.01489 =
         0.01559    0.00074    0.00435   -0.00066
AFIX  43
H10   2    0.928283    0.579994    0.966204    11.00000   -1.20000
AFIX   0
C12   1    0.604654    0.826746    0.590144    11.00000    0.01858    0.01737 =
         0.01658   -0.00064    0.00403    0.00650
AFIX  23
H12A  2    0.637291    0.928160    0.606149    11.00000   -1.20000
H12B  2    0.567155    0.816491    0.642243    11.00000   -1.20000
AFIX   0
C13   1    0.535836    0.815868    0.458764    11.00000    0.01564    0.01588 =
         0.01544   -0.00105    0.00458    0.00552
C14   1    0.551294    0.906372    0.372012    11.00000    0.01679    0.01723 =
         0.01968   -0.00214    0.00603   -0.00043
AFIX  43
H14   2    0.607733    0.970220    0.395575    11.00000   -1.20000
AFIX   0
C15   1    0.484792    0.903978    0.251265    11.00000    0.02302    0.01991 =
         0.01680    0.00065    0.00789    0.00066
AFIX  43
H15   2    0.495637    0.966502    0.192791    11.00000   -1.20000
AFIX   0
C16   1    0.402479    0.810067    0.216227    11.00000    0.01673    0.02323 =
         0.01605   -0.00383    0.00353    0.00360
AFIX  43
H16   2    0.357043    0.808373    0.133737    11.00000   -1.20000
AFIX   0
C17   1    0.386557    0.718805    0.301501    11.00000    0.01580    0.02297 =
         0.02327   -0.00559    0.00828   -0.00193
AFIX  43
H17   2    0.330438    0.654200    0.277397    11.00000   -1.20000
AFIX   0
C18   1    0.452987    0.721965    0.422631    11.00000    0.02102    0.01943 =
         0.01915   -0.00009    0.01028    0.00114
AFIX  43
H18   2    0.441752    0.659728    0.480976    11.00000   -1.20000
AFIX   0
C19   1    0.880635    0.321187    0.484493    11.00000    0.02050    0.02536 =
         0.02027   -0.00030    0.00900    0.00550
AFIX  33
H19A  2    0.921000    0.236288    0.476555    11.00000   -1.20000
H19B  2    0.816002    0.318118    0.416795    11.00000   -1.20000
H19C  2    0.912946    0.418728    0.483023    11.00000   -1.20000
AFIX   0
C20   1    0.818092    0.155199    0.610676    11.00000    0.02804    0.01811 =
         0.02502   -0.00125    0.01116    0.00202
AFIX  33
H20A  2    0.857231    0.069386    0.601370    11.00000   -1.20000
H20B  2    0.812640    0.147283    0.689424    11.00000   -1.20000
H20C  2    0.752328    0.152042    0.545176    11.00000   -1.20000
AFIX   0
HKLF 4

REM  AHAA23
REM R1 =  0.0274 for    2906 Fo > 4sig(Fo)  and  0.0293 for all    3112 data
REM    181 parameters refined using      0 restraints

END

WGHT      0.0350      0.6473

REM No hydrogen bonds found for HTAB generation

REM Highest difference peak  0.318,  deepest hole -0.211,  1-sigma level  0.040
Q1    1   0.8748  0.3070  0.5459  11.00000  0.05    0.32
Q2    1   0.9179  0.3120  0.6554  11.00000  0.05    0.32
Q3    1   0.5680  0.8103  0.5202  11.00000  0.05    0.31
Q4    1   0.8494  0.6166  0.8466  11.00000  0.05    0.29
Q5    1   0.4995  0.7606  0.4361  11.00000  0.05    0.29
;

_shelx_res_checksum    2530

_shelx_hkl_file
;
  -1   0   0   -0.04    0.05
   1   0   0   -0.03    0.03
   0   0   1    0.11    0.05
   0   0  -1    0.11    0.05
   0   0   1    0.10    0.08
  -1   0   1    0.02    0.05
   1   0  -1   -0.03    0.04
   0   1   0    0.07    0.08
   0  -1   0    0.00    0.07
   0  -1   0    0.02    0.05
   0  -1   0    0.08    0.09
   0   1   0   -0.03    0.04
   0  -1   0    0.11    0.11
   0   1   0   -0.05    0.05
   0   1   0   -0.02    0.06
   0  -1   0    0.03    0.04
   0   1   0    0.01    0.08
  -1  -1   0 1007.21   15.90
  -1   1   0  926.90   15.85
   1  -1   0 1017.93   15.85
  -1  -1   0  987.12   15.90
   1   1   0  996.21   15.90
  -1   1   0  951.13   15.96
   1   1   0 1005.69   15.88
  -1   1   0  984.59   15.87
   1  -1   0 1009.64   15.97
   1  -1   0 1001.20   15.85
   1  -1   0 1025.93   15.88
   1   0   1    0.12    0.14
   1   0   1    0.11    0.12
  -1   0  -1    0.01    0.11
  -1   0  -1   -0.02    0.14
   1   0   1    0.04    0.05
  -1   0  -1    0.02    0.07
  -2   0   1    0.16    0.10
  -2   0   1    0.69    0.09
  -2   0   1    0.06    0.10
   2   0  -1    0.85    0.10
   0  -1  -1    0.13    0.10
   0  -1  -1   -0.03    0.13
   0   1   1    0.12    0.08
   0   1  -1    0.07    0.07
   0  -1   1    0.35    0.07
   0  -1   1    0.17    0.08
   0   1   1    0.05    0.13
   0   1   1    0.07    0.14
   0  -1  -1    0.20    0.15
   0   1   1    0.10    0.13
   1  -1  -1  213.74    3.53
   1  -1  -1  206.92    3.41
  -1   1   1  206.71    3.46
   1  -1  -1  203.90    3.59
  -1   1   1  209.21    3.42
  -1   1   1  206.87    3.58
  -1   1   1  208.14    3.52
  -1  -1   1  196.08    3.48
  -1  -1   1  201.20    3.32
   1  -1  -1  206.87    3.46
  -2   0   0  168.21    2.78
   2   0   0  164.22    2.88
   2   0   0  169.85    2.89
  -2   0   0  170.01    2.90
  -2   0   0  168.25    2.89
   1   0  -2  133.17    2.30
  -1   0   2  131.35    2.30
   1   1   1 1103.75   17.64
   1   1   1 1088.98   17.66
   1  -1   1 1120.15   17.56
  -1  -1  -1 1116.32   17.53
   1  -1   1 1076.14   17.59
  -1   1  -1 1077.18   17.55
  -1  -1  -1 1106.76   17.68
  -1  -1  -1 1089.57   17.64
  -2  -1   1 3942.41   62.38
   2   1  -1 3975.29   62.53
  -2   1   1 3763.03   62.59
  -2  -1   1 3941.77   62.54
  -2   1   1 3971.50   62.49
   2  -1  -1 3953.84   62.48
   2  -1  -1 3943.42   62.53
  -2   1   1 3960.34   62.52
   0   0   2 1928.94   30.89
   0   0  -2 1919.48   30.76
   0   0   2 1925.50   30.87
   0   0   2 1889.76   30.75
   0   0   2 2012.90   30.81
  -2   0   2  126.53    2.16
  -2   0   2  126.87    2.10
  -2  -1   0  861.44   14.09
  -2   1   0  858.42   14.07
   2   1   0  849.08   14.12
   2   1   0  884.25   14.10
  -2   1   0  870.49   14.11
  -2  -1   0  901.38   14.12
   2  -1   0  863.02   14.10
   2  -1   0  891.98   14.09
  -2  -1   0  894.99   14.11
  -2   0  -1    0.11    0.10
  -2   0  -1    0.17    0.18
   2   0   1   -0.01    0.14
  -2   0  -1   -0.02    0.20
   2   0   1    0.17    0.22
  -3   0   1    0.11    0.14
  -3   0   1    0.20    0.11
   3   0  -1   -0.02    0.14
  -1  -1   2  427.73    6.84
   1  -1  -2  424.04    6.96
  -1   1   2  412.70    6.96
  -1   1   2  410.85    7.08
  -1   1   2  434.61    6.89
  -1   1   2  428.25    7.06
   1  -1  -2  435.75    7.07
   0   1   2 3939.41   61.40
   0   1   2 3774.99   61.30
   0  -1   2 3883.15   61.24
   0   1  -2 3809.83   61.23
   0  -1   2 3893.54   61.25
   0   1   2 3920.62   61.35
   0  -1  -2 3909.93   61.30
   0  -1  -2 3754.64   61.41
  -2   1   2   18.40    0.67
   2  -1  -2   19.28    0.56
  -2   1   2   18.01    0.55
  -2   1   2   19.10    0.62
  -2   1   2   19.39    0.51
   2  -1  -2   18.17    0.50
  -2  -1   2   18.21    0.44
  -2  -1   2   18.16    0.42
  -2  -1   2   17.72    0.56
  -3   0   0 3328.21   52.53
   3   0   0 3337.11   52.53
  -3   0   0 3280.09   52.36
  -3   0   0 3270.91   52.54
   1   0   2   48.50    1.12
   1   0   2   50.90    1.16
  -1   0  -2   48.40    0.97
  -1   0  -2   50.09    1.15
   1   0   2   48.72    0.98
   1   0   2   48.89    0.97
  -1   0  -2   48.84    0.98
  -1   0  -2   47.35    1.11
  -3   0   2 2526.04   39.57
  -3   0   2 2443.57   39.55
  -3   0   2 2493.76   39.56
   0  -2   0 7470.31  116.29
   0  -2   0 7421.84  116.17
   0   2   0 7496.18  116.11
   2  -1   1  203.85    3.49
  -2   1  -1  206.15    3.46
  -2  -1  -1  196.78    3.36
   2  -1   1  209.33    3.55
   2   1   1  210.29    3.62
  -2  -1  -1  215.30    3.64
   2   1   1  201.75    3.52
  -2  -1  -1  205.97    3.63
   2   1   1  188.69    3.59
   3  -1  -1  462.48    7.53
   3   1  -1  469.44    7.71
   3  -1  -1  466.40    7.70
  -3   1   1  476.06    7.55
  -3  -1   1  464.58    7.62
  -3   1   1  471.72    7.70
   3  -1  -1  464.40    7.70
  -3  -1   1  456.72    7.71
  -3   1   1  456.80    7.68
   1  -2   0  886.20   14.24
   1  -2   0  898.15   14.33
   1  -2   0  881.55   14.33
  -1  -2   0  885.17   14.19
  -1  -2   0  879.42   14.38
   1  -2   0  899.98   14.49
   1   2   0  903.18   14.38
   1   2   0  873.71   14.33
   1   2   0  878.71   14.19
   0  -2   1    6.09    0.27
   0   2  -1    6.42    0.25
   0  -2   1    6.22    0.35
   0  -2   1    5.92    0.22
   0  -2   1    6.33    0.30
   0  -2  -1    8.05    0.32
   0   2   1    5.64    0.35
   0  -2  -1    6.34    0.38
   0  -2  -1    5.69    0.43
   0   2   1    6.13    0.30
  -1  -2   1 1674.14   26.54
  -1   2   1 1664.79   26.31
   1  -2  -1 1694.66   26.38
   1   2  -1 1614.08   26.23
   1  -2  -1 1685.22   26.47
   1  -2  -1 1656.36   26.55
   1   2  -1 1658.95   26.28
  -1  -2   1 1669.75   26.30
  -1   2   1 1701.78   26.70
   1  -2  -1 1698.75   26.70
  -1  -2   1 1683.21   26.45
  -3  -1   0 4037.96   66.09
   3  -1   0 4009.57   66.05
  -3   1   0 4268.57   65.95
   3  -1   0 4062.85   65.98
  -3   1   0 4035.85   66.03
   3  -1   0 4003.76   65.98
  -3  -1   0 4264.54   65.75
  -3   1   0 4374.95   66.00
   3   1   0 4070.05   66.04
  -3  -1   0 4049.51   66.02
   1  -1   2   58.30    1.14
   1   1   2   54.54    1.26
   1   1   2   54.50    1.21
   1  -1   2   56.35    1.18
   1   1   2   55.80    1.31
  -1   1  -2   53.06    1.10
  -3  -1   2 9808.59  156.70
   3  -1  -2 9846.82  156.90
  -3   1   2 9928.69  156.86
  -3  -1   2 9878.81  156.91
  -3  -1   2 9999.00  156.69
  -3   1   2 9835.63  156.91
   3  -1  -2 9975.16  156.84
  -1   0   3    0.06    0.15
  -1   0   3    0.12    0.17
  -2   0   3    0.06    0.11
  -2   0   3   -0.01    0.17
   2   0  -3   -0.09    0.13
  -1   2  -1  362.55    5.96
  -1   2  -1  367.83    6.14
   1   2   1  366.34    6.09
   1   2   1  363.60    5.98
  -1  -2  -1  358.88    5.97
  -1  -2  -1  365.33    6.20
  -1   2  -1  352.33    6.01
   1  -2   1  365.19    6.00
   1  -2   1  362.56    6.14
   1   2   1  361.52    6.19
   1  -2   1  372.18    5.97
   1  -2   1  361.09    6.06
  -2   2   1    8.39    0.41
   2  -2  -1    9.08    0.56
   2   2  -1    9.25    0.22
  -2  -2   1    8.76    0.42
   2   2  -1    9.52    0.45
   2  -2  -1    9.28    0.42
   2  -2  -1    9.18    0.37
  -2   2   1    9.02    0.52
   2  -2  -1    9.67    0.46
  -2  -2   1    9.31    0.44
  -2  -2   1    9.43    0.25
  -3   0  -1    0.03    0.12
  -3   0  -1    0.01    0.16
  -3   0  -1    0.02    0.22
  -3   0  -1    0.51    0.23
   3   0   1    0.07    0.26
   3   0   1    0.01    0.19
  -4   0   1    0.28    0.21
  -4   0   1    0.19    0.21
  -4   0   1    0.50    0.17
   4   0  -1    0.42    0.16
  -2  -2   0  390.90    6.62
   2   2   0  404.51    6.64
  -2   2   0  389.77    6.52
   2  -2   0  392.92    6.52
   2  -2   0  388.79    6.58
  -2  -2   0  390.61    6.62
   2   2   0  408.52    6.63
   2   2   0  391.49    6.34
   2   2   0  369.74    6.55
   2  -2   0  411.42    6.56
  -2   2   0  385.88    6.55
  -2  -2   0  391.70    6.32
   0   0   3    0.40    0.19
   0   0   3    0.02    0.11
   0   0   3    0.52    0.29
   0   0   3    0.09    0.15
   0   0  -3    0.07    0.15
   0   0   3    0.02    0.16
  -3   0   3   -0.06    0.17
   3   0  -3    0.09    0.11
  -3   0   3    0.08    0.14
   2   0   2   25.48    0.82
   2   0   2   25.48    0.58
   2   0   2   24.86    0.76
  -2   0  -2   22.75    0.78
  -2   0  -2   24.03    0.59
  -2   0  -2   24.31    0.61
  -2   0  -2   24.54    0.77
  -1   1   3  356.97    6.17
  -1   1   3  359.51    6.18
   1  -1  -3  364.05    6.06
  -1  -1   3  358.35    5.95
  -1   1   3  366.92    6.08
   1  -1  -3  354.71    6.07
  -1  -1   3  366.11    5.96
  -1   1   3  349.07    6.06
  -4   0   2  307.08    5.11
  -4   0   2  310.64    5.14
   4   0  -2  310.13    5.08
  -4   0   2  309.60    5.10
  -2  -1   3 1717.51   27.34
  -2   1   3 1679.24   27.61
  -2   1   3 1666.67   27.34
  -2   1   3 1729.54   27.66
  -2  -1   3 1740.49   27.29
  -2   1   3 1672.27   27.47
   2  -1  -3 1735.64   27.47
  -2   1   3 1730.41   27.34
   1  -2  -2  151.23    2.71
   1  -2  -2  148.32    2.58
  -1   2   2  148.78    2.82
   1  -2  -2  145.17    2.84
  -1   2   2  149.95    2.61
   1   2  -2  137.86    2.51
  -1  -2   2  148.98    2.60
   1  -2  -2  150.86    2.94
  -1   2   2  153.49    2.93
  -1   2   2  142.75    2.53
  -1  -2   2  149.04    2.53
   0  -2  -2  493.32    8.30
   0   2   2  482.14    8.42
   0  -2  -2  504.45    8.43
   0   2   2  494.67    8.23
   0  -2  -2  505.11    8.26
   0  -2   2  500.28    8.12
   0  -2   2  484.93    8.10
   0   2  -2  508.64    8.12
   0  -2   2  508.10    8.18
   0  -2   2  495.90    8.18
   3   1   1  787.75   12.46
  -3   1  -1  776.58   12.58
   3   1   1  769.07   12.78
  -3  -1  -1  773.25   12.46
   3   1   1  775.84   12.63
  -3   1  -1  716.65   12.71
  -3   1  -1  790.83   12.78
  -3  -1  -1  741.65   12.83
  -3  -1  -1  821.16   12.80
   3  -1   1  770.44   12.75
   3  -1   1  783.64   12.63
   3   1   1  798.50   12.80
   2  -2  -2 1476.95   23.70
  -2   2   2 1524.15   23.94
  -2   2   2 1502.91   23.82
  -2   2   2 1525.80   23.74
   2  -2  -2 1517.54   23.94
  -2  -2   2 1504.10   23.53
  -2   2   2 1406.60   23.48
   2  -2  -2 1477.20   24.09
   2  -2  -2 1509.05   23.81
  -2   2   2 1496.55   24.07
   2   2  -2 1500.70   23.52
  -2  -2   2 1411.90   23.87
  -4   0   0  128.44    2.44
  -4   0   0  127.69    2.46
   4   0   0  121.56    2.26
  -4   0   0  128.36    2.23
   4   0   0  123.77    2.43
  -4   1   1  116.97    2.22
  -4   1   1  114.08    2.15
   4  -1  -1  109.80    2.20
  -4  -1   1  110.04    2.20
   4  -1  -1  114.12    2.07
  -4  -1   1  117.37    1.92
  -4  -1   1  117.46    2.15
  -4   1   1  111.76    2.08
   0   1  -3   97.39    1.88
   0  -1  -3  100.13    1.99
   0  -1   3   98.74    1.81
   0   1   3   97.09    1.96
   0  -1  -3  100.24    1.90
   0  -1   3   99.93    1.86
   0   1  -3   97.06    1.81
   0   1   3   96.30    1.98
   3   1  -3  173.61    2.98
  -3  -1   3  170.14    2.88
  -3   1   3  173.82    3.05
  -3  -1   3  175.81    2.99
  -3  -1   3  170.49    3.15
  -3   1   3  177.00    3.15
   2  -1   2 1030.85   16.10
   2   1   2 1040.29   16.20
   2   1   2 1024.98   16.23
  -2  -1  -2  899.50   16.20
  -2   1  -2  972.48   15.94
   2   1   2 1019.84   16.04
   2  -1   2  986.07   15.97
  -2  -1  -2  981.11   16.04
  -2  -1  -2  944.62   16.24
   4  -1  -2  894.55   14.19
  -4   1   2  904.14   14.45
  -4  -1   2  878.88   14.31
  -4  -1   2  907.45   14.49
  -4  -1   2  898.71   14.22
  -4   1   2  901.63   14.47
   4   1  -2  887.80   14.32
  -4   1   2  882.67   14.21
   2  -2   1  146.69    2.76
   2  -2   1  150.70    2.76
   2   2   1  152.58    2.82
  -2   2  -1  138.92    2.74
   2  -2   1  156.55    2.62
  -2   2  -1  154.60    2.72
  -2   2  -1  151.90    2.86
   2   2   1  152.73    2.61
   2   2   1  143.86    2.84
  -2  -2  -1  152.73    2.85
  -2  -2  -1  154.82    2.60
   3  -2  -1 8808.68  139.19
   3  -2  -1 8892.68  138.98
   3  -2  -1 8605.75  139.27
  -3   2   1 8422.08  139.30
  -3   2   1 8665.66  139.23
  -3   2   1 8583.82  139.23
  -3  -2   1 8694.24  139.29
   3   2  -1 8801.45  139.09
   3   2  -1 8820.04  139.26
  -3  -2   1 9137.59  139.12
  -3  -2   1 8791.50  139.25
   1   0   3    0.10    0.13
   1   0   3    0.06    0.20
  -1   0  -3    1.26    0.21
  -1   0  -3    0.19    0.24
   1   0   3   -0.02    0.13
  -1   0  -3    0.99    0.17
   1   0   3    1.31    0.30
  -4   0   3   -0.05    0.17
  -4   0   3   -0.02    0.18
  -4   0   3    0.47    0.16
   4   0  -3    0.14    0.13
   4  -1   0  212.23    3.68
  -4  -1   0  204.56    3.39
   4   1   0  205.75    3.43
   4  -1   0  205.70    3.75
  -4   1   0  201.89    3.72
  -4  -1   0  212.52    3.73
  -4  -1   0  203.03    3.80
  -4   1   0  206.34    3.59
  -4   1   0  209.05    3.69
   3  -2   0  285.88    4.85
  -3  -2   0  281.85    4.99
   3   2   0  278.25    4.92
   3   2   0  282.35    4.96
   3  -2   0  285.07    4.95
   3  -2   0  283.99    4.93
  -3   2   0  287.99    4.85
  -3   2   0  284.20    4.90
   3   2   0  292.16    4.98
  -3  -2   0  280.96    4.96
   3   2   0  284.22    4.61
   1  -2   2  188.49    3.16
   1  -2   2  191.31    3.31
  -1   2  -2  198.39    3.34
   1  -2   2  184.64    3.34
   1   2   2  190.27    3.33
   1   2   2  181.42    3.50
   1   2   2  193.72    3.44
  -1  -2  -2  182.72    3.51
  -1  -2  -2  192.26    3.32
  -3  -2   2 6591.92  103.05
  -3  -2   2 6542.96  103.01
  -3  -2   2 6699.59  103.42
  -3   2   2 6644.34  103.40
   3  -2  -2 6663.48  103.41
  -3   2   2 6789.11  103.72
   3  -2  -2 6625.70  103.31
  -3   2   2 6680.99  103.31
   3   2  -2 6687.98  103.44
   1   1   3    0.07    0.17
  -1   1  -3    0.21    0.20
   1   1   3    0.41    0.25
   1  -1   3   -0.02    0.13
  -1  -1  -3    0.02    0.21
   1  -1   3    0.07    0.10
  -1   1  -3    0.07    0.15
   1   1   3   -0.29    0.28
   1  -1   3   -0.04    0.16
  -4  -1   3    1.15    0.17
   4   1  -3    1.17    0.15
  -4   1   3    1.19    0.13
  -4   1   3    1.49    0.25
  -4   1   3    1.23    0.28
  -4  -1   3    1.67    0.20
  -4  -1   3    1.21    0.22
  -2   0   4 3915.92   60.86
  -2   0   4 3861.59   60.82
   3   0   2  438.76    7.50
  -3   0  -2  425.93    7.45
   3   0   2  432.22    7.43
  -3   0  -2  421.55    7.17
  -3   0  -2  435.82    7.54
   3   0   2  442.05    7.11
  -3   0  -2  435.16    7.13
  -5   0   2  921.88   15.52
  -5   0   2  927.87   15.58
   5   0  -2  970.38   15.53
  -5   0   2  957.74   15.50
  -4   0  -1    0.05    0.15
   4   0   1    0.41    0.14
   4   0   1    0.55    0.23
  -4   0  -1    0.23    0.26
  -4   0  -1    0.09    0.24
   1  -2  -3   40.02    0.97
  -1   2   3   40.72    0.94
  -1   2   3   40.02    1.18
   1  -2  -3   38.01    1.12
   1   2  -3   37.88    0.80
  -1  -2   3   39.27    0.78
   1   2  -3   38.34    0.86
   1  -2  -3   40.41    1.01
  -1  -2   3   38.06    0.87
  -1   2   3   38.96    1.11
  -1   0   4    0.92    0.22
  -1   0   4    0.69    0.16
  -1   0   4    0.95    0.18
  -1   0   4    0.81    0.22
  -5   0   1   -0.01    0.23
  -5   0   1    0.06    0.17
  -5   0   1    0.01    0.25
   5   0  -1   -0.10    0.22
   5   0  -1    0.12    0.15
   2   2  -3   50.54    0.99
  -2   2   3   46.13    1.18
  -2   2   3   47.76    0.99
  -2   2   3   47.04    1.35
  -2   2   3   48.79    1.30
  -2  -2   3   48.65    0.98
   2  -2  -3   47.29    1.31
  -2   2   3   45.13    1.09
   2  -2  -3   46.59    1.19
  -3   0   4   19.86    0.64
  -3   0   4   18.11    0.53
   0   3   0    0.12    0.15
   0  -3   0    0.06    0.19
   0  -3   0    0.10    0.17
   0   3   0    0.07    0.19
   0  -3   0    0.08    0.32
   0  -3   0    0.13    0.24
   0   3   0    0.07    0.18
   1  -3   0  265.86    4.58
  -1   3   0  258.55    4.54
  -1  -3   0  267.79    4.45
   1   3   0  257.39    4.43
  -1   3   0  261.32    4.61
   1  -3   0  272.53    4.54
  -1  -3   0  246.97    4.60
   1  -3   0  265.24    4.46
  -1   3   0  254.29    4.49
   1  -3   0  262.46    4.81
   1  -3   0  267.53    4.63
   1   3   0  257.73    4.61
  -1  -3   0  264.89    4.68
  -2   1   4  150.14    2.87
  -2   1   4  153.29    2.83
  -2   1   4  147.61    3.01
  -2  -1   4  153.03    2.72
  -2  -1   4  153.70    2.79
   2  -1  -4  152.09    2.86
  -2   1   4  146.40    2.97
  -3  -2  -1   95.07    2.07
   3  -2   1   93.97    1.92
   3  -2   1   98.03    1.99
  -3   2  -1   98.86    1.88
   3  -2   1   94.56    1.95
   3   2   1   90.59    1.98
   3   2   1   95.04    1.71
   3   2   1   92.20    1.67
   3   2   1   97.87    1.99
   4   2  -1  377.35    6.53
   4   2  -1  388.19    6.69
   4  -2  -1  381.71    6.67
   4  -2  -1  392.47    6.64
   4  -2  -1  410.51    6.44
  -4   2   1  382.31    6.64
  -4  -2   1  379.96    6.54
  -4  -2   1  396.09    6.73
  -4  -2   1  387.78    6.66
  -4   2   1  377.24    6.65
  -4   2   1  396.06    6.69
   0  -3  -1  252.57    4.35
   0  -3   1  253.99    4.34
   0   3  -1  255.02    4.24
   0   3   1  249.40    4.36
   0  -3  -1  273.95    4.39
   0   3  -1  246.30    4.29
   0  -3  -1  255.45    4.56
   0   3   1  256.88    4.29
   0  -3   1  235.40    4.42
   0  -3  -1  261.04    4.74
   0   3   1  234.30    4.33
   0  -3   1  241.04    4.40
   0   3  -1  251.11    4.38
   0  -3   1  248.34    4.55
   0  -3   1  252.62    4.20
   3   1   2   33.83    0.88
  -3  -1  -2   34.03    1.07
  -3   1  -2   35.85    1.04
  -3  -1  -2   33.19    0.89
   3  -1   2   32.19    0.96
  -3   1  -2   33.26    0.82
  -3  -1  -2   32.90    1.04
   3  -1   2   33.24    0.85
   3   1   2   35.24    1.07
   3   1   2   34.19    1.01
   3   1   2   35.68    0.79
  -3  -1  -2   29.85    0.77
   1  -3  -1  621.02   11.01
  -1   3   1  585.31   11.26
   1  -3  -1  680.15   10.89
   1   3  -1  681.56   10.82
  -1   3   1  686.41   10.94
  -1  -3   1  681.84   11.05
  -1   3   1  690.79   10.90
   1   3  -1  685.36   10.77
  -1   3   1  680.47   11.01
   1   3  -1  569.83   10.97
   1  -3  -1  675.46   11.35
   1  -3  -1  696.17   11.16
  -1  -3   1  687.77   10.87
   0   2   3    3.26    0.37
   0   2   3    3.33    0.35
   0  -2  -3    4.07    0.29
   0  -2   3    3.52    0.25
   0  -2   3    3.59    0.20
   0   2  -3    3.68    0.26
   0  -2   3    3.90    0.24
   2   0   3   -0.06    0.28
   2   0   3    0.05    0.21
   2   0   3    0.01    0.12
  -2   0  -3    0.27    0.27
  -2   0  -3    0.17    0.16
  -2   0  -3    0.23    0.17
  -3   2   3  968.34   16.13
  -3   2   3  974.49   16.00
  -3  -2   3  957.89   16.16
   3  -2  -3  967.89   16.11
   3  -2  -3  994.88   15.98
  -3  -2   3  993.49   15.77
  -3  -2   3  981.72   15.81
  -3   2   3 1023.55   16.34
  -3   2   3 1001.22   16.47
  -5  -1   2   92.69    1.81
  -5  -1   2   88.82    1.90
  -5  -1   2   90.77    1.65
  -5   1   2   88.99    1.89
  -5   1   2   91.41    1.86
   5  -1  -2   90.46    1.68
  -5   1   2   92.29    1.72
   5   1  -2   94.72    1.82
   5   1  -2   91.60    1.67
  -2   2  -2   14.64    0.52
   2   2   2   13.35    0.62
  -2  -2  -2   14.37    0.46
  -2   2  -2   13.37    0.54
   2  -2   2   13.84    0.52
   2   2   2   13.39    0.47
   2   2   2   14.21    0.59
   2  -2   2   15.20    0.54
  -2   2  -2   13.93    0.50
   4   1   1   10.76    0.60
  -4  -1  -1   11.57    0.37
  -4  -1  -1   11.92    0.58
  -4  -1  -1   11.87    0.61
   4  -1   1   11.69    0.59
   4   1   1   10.94    0.36
  -4  -1  -1   11.97    0.50
  -4   1  -1   12.68    0.47
  -4   1  -1   11.26    0.55
  -4   1  -1   11.07    0.56
   4  -1   1   12.89    0.56
   4   2  -2  598.03    9.69
  -4  -2   2  579.86   10.01
  -4  -2   2  599.25    9.72
   4  -2  -2  615.45    9.93
  -4   2   2  600.65    9.98
   4   2  -2  607.19   10.02
  -4   2   2  588.20    9.94
   4  -2  -2  582.11   10.01
  -1   1   4  198.78    3.69
  -1  -1   4  202.45    3.47
   1  -1  -4  197.68    3.58
  -1   1   4  201.58    3.62
   1  -1  -4  202.42    3.73
  -1  -1   4  199.66    3.52
  -1   1   4  200.98    3.64
  -1   1   4  210.15    3.72
   5   1  -1    1.02    0.23
  -5   1   1    0.52    0.22
  -5  -1   1    0.59    0.13
  -5   1   1    0.60    0.20
  -5   1   1    0.61    0.25
   5  -1  -1    0.53    0.26
   5   1  -1    0.77    0.14
  -5  -1   1    0.64    0.25
   5  -1  -1    0.73    0.22
  -5  -1   1    0.52    0.26
  -5   0   3    0.02    0.21
  -5   0   3    0.01    0.20
   5   0  -3   -0.06    0.13
   5   0  -3    0.25    0.17
   5   0  -3   -0.13    0.20
  -3   1   4  307.94    5.21
  -3   1   4  329.44    5.62
  -3  -1   4  309.54    5.16
   3  -1  -4  310.33    5.35
  -3   1   4  282.86    5.55
  -3  -1   4  291.88    5.21
  -3   1   4  306.66    5.35
  -3  -1   4  309.07    5.04
   0   0  -4  191.51    3.37
   0   0   4  194.08    3.46
   0   0   4  192.56    3.47
   0   0   4  197.90    3.62
   0   0   4  195.69    3.67
   4   0  -4    7.23    0.33
   4   0  -4    6.59    0.37
  -4   0   4    7.44    0.40
  -4   0   4    7.65    0.36
   5   0   0    4.55    0.29
   5   0   0    4.09    0.43
  -5   0   0    4.60    0.40
  -5   0   0    4.55    0.27
  -5   0   0    3.58    0.38
   5   0   0    4.51    0.38
  -1   3  -1  127.94    2.45
  -1   3  -1  130.97    2.43
  -1   3  -1  133.98    2.65
  -1  -3  -1  129.68    2.54
   1  -3   1  132.81    2.48
   1  -3   1  131.35    2.51
   1  -3   1  137.67    2.40
   1   3   1  130.63    2.65
   1   3   1  133.60    2.53
  -1   3  -1  132.09    2.45
   1  -3   1  129.28    2.65
  -1  -3  -1  133.57    2.43
  -1  -3  -1  128.72    2.78
  -1  -3  -1  131.40    2.67
   1   3   1  134.44    2.43
   2  -3  -1  275.63    4.57
   2  -3  -1  280.03    4.88
   2   3  -1  275.98    4.49
  -2   3   1  277.03    4.90
   2   3  -1  279.16    4.90
  -2  -3   1  276.87    4.53
   2  -3  -1  269.24    4.82
   2  -3  -1  281.35    4.70
  -2  -3   1  266.62    4.82
   2  -3  -1  278.75    5.13
   4  -2   0   28.56    0.80
   4  -2   0   26.99    0.84
  -4  -2   0   28.93    0.89
  -4   2   0   27.84    0.81
   4  -2   0   30.02    0.87
  -4  -2   0   27.26    0.91
  -4   2   0   29.13    0.79
   4   2   0   26.84    0.86
   4   2   0   26.95    0.89
   4   2   0   28.31    0.57
  -2  -3   0  360.43    6.33
   2  -3   0  368.71    6.15
   2  -3   0  354.86    6.26
  -2   3   0  364.41    6.46
  -2   3   0  366.24    6.19
   2  -3   0  360.27    6.50
  -2   3   0  364.77    6.23
  -2  -3   0  366.91    5.99
   2  -3   0  362.77    6.27
   2   3   0  353.17    6.31
   2   3   0  351.69    6.27
   2   3   0  374.42    5.99
  -2  -1  -3   63.93    1.44
   2  -1   3   59.65    1.44
   2   1   3   63.22    1.34
   2   1   3   60.71    1.37
  -2   1  -3   63.66    1.49
   2   1   3   58.17    1.28
  -2   1  -3   62.21    1.31
   2   1   3   63.10    1.57
   2  -1   3   64.94    1.36
   2  -1   3   63.94    1.60
   2   1   3   61.38    1.56
  -5   1   3    3.27    0.35
  -5  -1   3    3.45    0.25
   5   1  -3    3.19    0.33
  -5  -1   3    3.16    0.26
   5   1  -3    3.48    0.23
   5  -1  -3    3.25    0.20
   5   1  -3    3.78    0.25
  -5   1   3    3.32    0.21
  -5  -1   3    3.04    0.29
   0  -1   4    0.95    0.17
   0  -1  -4    0.49    0.27
   0   1   4    0.40    0.30
   0  -1  -4    0.69    0.26
   0  -1   4    0.88    0.20
   0  -1   4    0.67    0.19
   0  -1  -4    0.38    0.27
   0   1   4    0.54    0.23
   0   1  -4    0.29    0.18
  -1  -3   2    1.35    0.18
   1  -3  -2    1.39    0.40
   1   3  -2    1.23    0.17
   1  -3  -2    1.42    0.25
  -1   3   2    1.17    0.29
   1  -3  -2    1.21    0.20
   1   3  -2    1.34    0.13
  -1   3   2    1.26    0.19
  -1   3   2    1.16    0.33
  -1  -3   2    1.49    0.25
   1  -3  -2    1.05    0.33
  -1  -3   2    1.11    0.10
  -1   3   2    1.44    0.29
  -4  -1   4  886.28   14.93
  -4   1   4  954.25   15.23
  -4   1   4  928.86   15.11
  -4  -1   4  930.32   15.08
   4   1  -4  974.38   15.07
   4   1  -4  926.81   14.90
  -4  -1   4  929.19   15.24
  -5   1   0  112.20    2.31
   5   1   0  112.94    2.03
  -5   1   0  112.57    2.17
  -5  -1   0  111.21    1.98
  -5   1   0  112.43    2.35
  -5  -1   0  115.99    2.35
   5  -1   0  110.92    2.34
   5  -1   0  118.50    2.30
  -5  -1   0  111.61    2.40
   1  -2   3 1780.42   28.79
  -1   2  -3 1819.04   29.10
  -1  -2  -3 1779.87   29.38
  -1  -2  -3 1821.71   29.10
   1   2   3 1854.13   29.13
   1   2   3 1835.14   29.25
  -1  -2  -3 1857.74   29.37
   1  -2   3 1828.70   29.08
   1   2   3 1796.98   29.32
   1  -2   3 1836.15   29.09
  -4  -2   3 1673.40   26.75
  -4  -2   3 1665.76   26.75
   4  -2  -3 1720.93   27.08
  -4   2   3 1678.87   27.07
  -4  -2   3 1707.01   27.20
  -4  -2   3 1683.52   26.80
   4  -2  -3 1682.86   27.17
  -4   2   3 1656.90   27.60
  -4   2   3 1687.52   27.18
   0   3   2  277.53    5.03
   0   3  -2  296.63    4.98
   0  -3   2  290.64    5.14
   0  -3  -2  293.07    5.09
   0   3   2  289.94    5.32
   0  -3  -2  308.15    5.13
   0  -3  -2  302.54    5.49
   0  -3   2  294.82    5.01
   0   3   2  310.23    5.11
   0   3  -2  294.23    4.91
   0  -3  -2  291.89    5.30
   0  -3   2  279.80    4.85
   0  -3   2  302.20    5.03
  -2   3   2  618.15   11.23
   2  -3  -2  650.66   10.75
  -2  -3   2  663.51   10.83
  -2  -3   2  666.51   10.58
  -2   3   2  674.37   10.57
   2   3  -2  628.59   10.44
   2  -3  -2  660.33   11.27
   2   3  -2  665.40   10.53
   2  -3  -2  660.65   10.88
   2  -3  -2  658.30   11.01
   2   3   1  159.86    3.14
  -2  -3  -1  153.88    3.13
   2   3   1  158.92    2.82
  -2   3  -1  159.36    2.96
  -2   3  -1  161.41    3.13
  -2   3  -1  160.45    2.87
   2  -3   1  162.74    3.03
   2  -3   1  159.35    2.92
  -2  -3  -1  163.47    2.82
   2  -3   1  157.44    3.17
   2   3   1  156.52    3.03
   2  -3   1  161.28    2.90
  -1   0  -4 1299.09   22.02
   1   0   4 1323.96   22.37
   1   0   4 1362.16   22.28
   1   0   4 1423.48   22.06
  -1   0  -4 1401.28   21.99
  -1   0  -4 1401.37   22.06
   1   0   4 1337.48   22.02
   3   3  -1   77.65    1.77
  -3   3   1   80.77    1.76
   3  -3  -1   75.68    1.63
  -3  -3   1   74.52    1.36
   3   3  -1   80.48    1.57
   3   3  -1   76.35    1.32
  -3  -3   1   77.41    1.75
   3  -3  -1   79.18    1.76
   3  -3  -1   81.44    1.78
  -3  -3   1   73.61    1.76
  -5   0   4 1111.81   17.59
  -5   0   4 1106.11   17.54
  -5   0   4 1077.25   17.51
   5   0  -4 1109.98   17.58
  -4   0  -2 2043.04   34.20
   4   0   2 2102.72   34.22
  -4   0  -2 2107.54   33.84
  -4   0  -2 2197.99   33.87
  -4   0  -2 2143.51   34.31
   4   0   2 2087.73   33.89
   6   0  -2  312.68    5.27
   6   0  -2  308.23    5.28
  -6   0   2  311.47    5.38
  -6   0   2  296.39    5.35
  -6   0   2  316.20    5.22
  -2   2   4  557.67    9.55
  -2   2   4  564.29    9.62
   2  -2  -4  549.82    9.57
   2   2  -4  563.47    9.13
   2  -2  -4  571.00    9.23
   2  -2  -4  567.74    9.36
  -2  -2   4  558.21    9.11
  -2   2   4  530.25    9.16
  -2  -2   4  543.85    8.98
   2  -2  -4  518.84    9.62
  -2   2   4  560.01    9.36
  -2   2   4  578.05    9.21
   3   2   2  129.34    2.54
  -3   2  -2  127.53    2.40
  -3   2  -2  124.92    2.54
   3  -2   2  125.30    2.63
   3   2   2  124.36    2.63
   3  -2   2  124.05    2.47
   3   2   2  129.99    2.28
   3   2   2  126.93    2.33
  -3  -2  -2  121.39    2.55
   3  -2   2  123.08    2.50
  -3   3   0  730.31   11.96
  -3   3   0  742.90   11.93
   3  -3   0  720.84   11.92
  -3   3   0  735.70   12.28
   3  -3   0  710.98   12.03
  -3  -3   0  711.97   12.09
   3   3   0  730.48   11.62
   3   3   0  723.68   11.99
  -3  -3   0  714.19   11.61
   3  -3   0  724.69   11.95
   3   3   0  724.32   12.07
   3   3   0  723.18   12.06
   1  -3   2   58.80    1.23
  -1   3  -2   58.98    1.20
  -1   3  -2   57.66    1.28
   1  -3   2   56.79    1.33
  -1  -3  -2   58.87    1.45
  -1   3  -2   59.89    1.37
   1   3   2   56.86    1.49
  -1  -3  -2   60.61    1.31
   1   3   2   58.39    1.37
   1  -3   2   59.55    1.24
  -1  -3  -2   58.12    1.61
  -1  -3  -2   60.11    1.53
  -1   3  -2   60.84    1.28
   1  -3   2   57.99    1.41
   1   3   2   58.73    1.30
  -5   2   2  227.87    4.14
  -5   2   2  218.38    3.77
   5  -2  -2  225.82    4.10
   5   2  -2  228.70    3.94
  -5  -2   2  225.53    3.97
  -5  -2   2  211.50    4.16
   5  -2  -2  222.65    4.16
  -5   2   2  220.84    4.12
   5  -2  -2  235.92    3.74
   3  -3  -2  190.84    3.70
  -3  -3   2  189.92    3.55
   3   3  -2  195.33    3.64
   3   3  -2  190.79    3.14
  -3  -3   2  191.32    3.18
  -3  -3   2  187.20    3.62
   3  -3  -2  188.11    3.62
   3  -3  -2  186.79    3.46
  -3   3   2  174.74    3.87
   3  -3  -2  189.30    3.94
   4   2   1 1744.23   27.19
   4  -2   1 1671.17   27.48
   4   2   1 1675.31   27.50
   4  -2   1 1738.76   27.56
   4  -2   1 1709.65   27.55
  -4  -2  -1 1718.22   27.72
  -4  -2  -1 1701.94   27.64
  -4   2  -1 1660.74   27.38
   4   2   1 1731.76   27.12
  -1  -2   4    0.26    0.15
   1  -2  -4    0.21    0.22
   1  -2  -4    0.21    0.35
  -1   2   4    0.21    0.22
  -1  -2   4    0.16    0.14
   1   2  -4    0.23    0.16
   1  -2  -4    0.08    0.20
  -1   2   4    0.25    0.28
  -1   2   4    0.40    0.25
  -5  -2   1   64.63    1.53
  -5  -2   1   61.72    1.56
   5  -2  -1   60.16    1.50
   5  -2  -1   65.39    1.52
  -5   2   1   62.63    1.34
  -5   2   1   64.89    1.54
   5   2  -1   61.15    1.44
  -5  -2   1   65.85    1.48
   5  -2  -1   66.02    1.35
   5   2  -1   64.28    1.54
  -5   2   1   62.59    1.48
  -5   0  -1    0.14    0.20
  -5   0  -1    0.05    0.26
   5   0   1    0.04    0.24
   5   0   1    0.02    0.16
  -5   0  -1    0.04    0.26
  -5   0  -1    0.03    0.16
  -3  -2   4    0.54    0.09
  -3  -2   4    0.74    0.07
  -3  -2   4    0.65    0.13
  -3   2   4    0.56    0.20
  -3   2   4    0.71    0.17
   3  -2  -4    0.85    0.24
  -3   2   4    0.82    0.31
  -3   0  -3    0.05    0.18
  -3   0  -3   -0.01    0.16
   3   0   3    0.10    0.23
   3   0   3    0.01    0.16
   3   0   3    0.28    0.37
  -3   0  -3    0.02    0.27
   6   0  -1    0.07    0.16
   6   0  -1   -0.12    0.25
  -6   0   1   -0.16    0.28
  -6   0   1    0.01    0.17
  -6   0   1   -0.14    0.29
   1  -1   4  305.58    5.33
  -1   1  -4  293.30    5.17
   1  -1   4  287.45    5.50
  -1  -1  -4  300.07    5.32
  -1   1  -4  294.98    5.35
   1   1   4  301.79    5.47
   1  -1   4  295.57    5.16
   1   1   4  299.69    5.30
   1  -1   4  305.65    5.02
   1   1   4  300.84    5.51
  -1  -1  -4  305.56    5.33
   6   0  -3    0.07    0.20
  -6   0   3    0.14    0.16
  -6   0   3    0.07    0.22
   6   0  -3   -0.10    0.18
   6   0  -3    0.27    0.18
  -6   0   3   -0.17    0.25
  -5  -1   4   90.85    1.74
  -5  -1   4   91.57    1.96
  -5   1   4   91.69    1.89
  -5   1   4   88.34    1.97
  -5   1   4   89.96    1.71
   5   1  -4   92.67    1.71
   5   1  -4   89.15    1.77
  -5  -1   4   87.49    1.80
   4   1   2  163.47    3.21
  -4   1  -2  159.02    3.21
  -4   1  -2  159.59    2.68
  -4  -1  -2  157.13    3.27
   4  -1   2  164.46    3.14
  -4  -1  -2  164.12    2.83
  -4   1  -2  164.28    2.90
   4   1   2  148.27    2.79
  -4  -1  -2  161.56    3.22
  -4  -1  -2  154.82    2.96
   4   1   2  143.97    2.90
   4   1   2  159.23    3.22
  -2   0   5    0.28    0.20
  -2   0   5    0.10    0.20
  -2   0   5    0.14    0.21
  -3   0   5    0.03    0.21
  -3   0   5   -0.07    0.15
  -3   0   5    0.06    0.24
   6   1  -2  974.31   15.67
  -6   1   2  925.82   15.60
  -6   1   2  951.60   15.71
   6   1  -2  969.11   15.61
  -6   1   2  934.77   15.51
   6  -1  -2  930.54   15.67
  -6  -1   2  966.66   15.36
  -6  -1   2  955.44   15.60
   6   1  -2  987.23   15.41
   6  -1  -2  934.81   15.45
  -6  -1   2  943.43   15.68
  -2   2  -3  286.58    5.00
   2  -2   3  288.34    4.97
   2   2   3  290.81    5.15
   2   2   3  285.99    4.90
  -2   2  -3  285.61    4.88
   2   2   3  284.27    5.08
   2   2   3  280.93    5.27
  -2  -2  -3  283.31    5.12
   2  -2   3  287.51    4.92
  -1   3   3  404.28    7.01
  -1   3   3  390.48    6.57
  -1  -3   3  386.74    6.62
   1  -3  -3  381.02    7.11
  -1  -3   3  393.53    6.56
  -1  -3   3  396.12    6.66
  -1  -3   3  393.73    6.36
   1   3  -3  382.23    6.52
  -1   3   3  404.87    7.11
   1  -3  -3  397.35    6.76
   1  -3  -3  397.80    6.69
   1  -3  -3  397.36    7.00
  -1   3   3  394.56    6.76
   1   3  -3  389.24    6.41
   2   3  -3   62.27    1.24
  -2  -3   3   63.71    1.26
  -2  -3   3   59.58    1.56
   2  -3  -3   65.44    1.52
   2  -3  -3   62.61    1.65
   2  -3  -3   62.47    1.79
  -2   3   3   62.37    1.23
  -2   3   3   63.94    1.74
  -2   3   3   60.24    1.61
  -2  -3   3   62.00    1.40
   5   2  -3 1268.61   20.38
  -5  -2   3 1218.56   20.78
   5  -2  -3 1291.84   20.66
  -5  -2   3 1291.57   20.41
  -5  -2   3 1268.68   20.32
   5  -2  -3 1219.75   20.77
  -5   2   3 1289.47   20.76
  -5  -2   3 1284.80   20.27
  -5   2   3 1256.00   20.70
   5  -1   1  132.04    2.63
  -5  -1  -1  119.87    2.25
  -5  -1  -1  116.84    2.61
   5   1   1  127.68    2.28
  -5   1  -1  127.59    2.39
  -5  -1  -1  129.85    2.47
   5   1   1  122.64    2.67
   5  -1   1  123.84    2.61
  -5   1  -1  127.82    2.64
  -5  -1  -1  129.24    2.75
  -5   1  -1  125.58    2.64
   3   1   3    7.18    0.42
   3  -1   3    7.26    0.39
  -3   1  -3    6.71    0.24
  -3  -1  -3    7.01    0.42
  -3  -1  -3    5.81    0.35
  -3   1  -3    7.55    0.38
  -3  -1  -3    7.67    0.56
  -3  -1  -3    6.86    0.54
   3   1   3    7.20    0.55
   3   1   3    7.55    0.51
  -3   1  -3    6.07    0.49
   3   1   3    8.25    0.37
   3  -1   3    7.17    0.47
   6   1  -1   64.40    1.31
   6   1  -1   58.52    1.53
   6   1  -1   64.52    1.54
   6  -1  -1   67.33    1.60
  -6   1   1   63.94    1.59
   6  -1  -1   65.10    1.51
  -6   1   1   64.03    1.45
  -6  -1   1   66.81    1.56
  -6  -1   1   64.17    1.63
   6  -1  -1   67.36    1.49
  -6  -1   1   66.03    1.25
  -6   1   1   66.32    1.51
   0   2   4   72.13    1.72
   0  -2   4   77.02    1.57
   0  -2   4   74.07    1.55
   0   2  -4   74.23    1.58
   0   2   4   67.91    1.63
   0  -2  -4   75.77    1.78
   0  -2  -4   74.68    1.85
   0  -2  -4   75.51    1.65
   0   2   4   73.28    1.79
  -1   0   5   -0.09    0.23
  -1   0   5    0.23    0.20
  -1   0   5   -0.01    0.17
  -1   0   5    0.23    0.17
  -1   0   5    0.13    0.27
  -4   2   4   70.49    1.83
  -4   2   4   70.04    1.56
  -4   2   4   69.20    1.30
   4  -2  -4   72.00    1.68
  -4   2   4   72.40    1.69
   4  -2  -4   70.26    1.54
  -4  -2   4   69.96    1.36
  -4  -2   4   69.47    1.71
  -4  -2   4   67.72    1.24
  -4  -2   4   67.56    1.41
  -4   2   4   70.90    1.93
   6   1  -3  376.43    6.19
  -6  -1   3  369.20    6.30
  -6  -1   3  373.16    6.20
  -6   1   3  355.45    6.18
  -6   1   3  364.34    6.42
   6  -1  -3  371.14    6.44
   6   1  -3  356.75    6.29
  -6   1   3  364.92    6.41
   6   1  -3  372.60    6.42
   6  -1  -3  380.48    6.15
  -6  -1   3  382.88    6.45
  -4   0   5    0.06    0.16
  -4   0   5    0.09    0.23
  -5  -2   0   21.20    0.47
   5  -2   0   21.75    0.74
  -5   2   0   19.91    0.70
   5   2   0   20.07    0.75
  -5  -2   0   21.40    0.87
   5   2   0   20.73    0.79
  -5  -2   0   18.52    0.75
   5  -2   0   21.62    0.78
   5  -2   0   18.90    0.74
  -2  -1   5   25.44    0.74
   2  -1  -5   24.72    0.82
  -2  -1   5   26.01    0.80
  -2   1   5   24.59    0.84
   2  -1  -5   24.66    0.92
  -2   1   5   26.71    0.96
  -2   1   5   24.95    0.89
  -2   1   5   25.67    0.86
  -3   1   5   90.50    1.82
  -3  -1   5   89.29    1.88
   3  -1  -5   89.59    1.98
  -3   1   5   88.72    1.98
  -3   1   5   90.62    1.93
  -3   1   5   89.50    2.15
  -3  -1   5   92.61    1.83
  -3   1   5   91.49    2.15
  -3  -1   5   92.10    1.68
   3   3   1 1090.39   18.16
   3   3   1 1082.69   18.09
  -3   3  -1 1105.17   18.01
  -3   3  -1 1135.80   17.80
   3  -3   1 1134.70   17.99
   3  -3   1 1090.32   17.83
  -3   3  -1 1076.61   18.22
  -3  -3  -1 1103.33   18.15
  -3  -3  -1 1086.07   17.70
   3   3   1 1121.60   17.73
   3   3   1 1109.66   18.14
   3  -3   1 1081.83   18.05
  -4  -3   1   71.14    1.68
   4   3  -1   64.66    1.63
  -4  -3   1   68.09    1.68
   4  -3  -1   70.06    1.40
   4  -3  -1   69.70    1.67
   4  -3  -1   70.31    1.58
  -4   3   1   68.16    1.64
  -4   3   1   70.37    1.62
   4   3  -1   70.44    1.51
   0   3  -3 1009.92   16.49
   0   3  -3 1026.95   16.44
   0  -3  -3  973.05   16.70
   0   3   3  989.86   16.89
   0  -3  -3 1007.28   16.64
   0  -3  -3  963.83   16.92
   0   3   3 1011.32   16.64
   0  -3   3 1008.62   16.55
   0  -3   3  990.26   16.45
   0  -3   3 1025.02   16.40
   0  -3   3  978.23   16.53
   3  -3  -3 3608.99   56.09
  -3   3   3 3587.74   55.76
  -3  -3   3 3543.59   56.04
  -3   3   3 3664.98   56.32
   3  -3  -3 3450.09   55.90
   3   3  -3 3659.64   55.45
   3  -3  -3 3595.97   56.40
   3  -3  -3 3573.41   55.74
  -3  -3   3 3590.60   55.46
  -2   3  -2  154.66    2.83
  -2  -3  -2  140.92    2.70
   2   3   2  146.67    2.74
   2  -3   2  150.05    2.79
  -2   3  -2  151.86    2.89
   2  -3   2  147.92    2.87
   2   3   2  148.29    2.92
  -2  -3  -2  150.05    3.04
   2  -3   2  149.13    2.63
  -2  -3  -2  156.75    3.06
   2   3   2  150.10    3.03
   6   0   0   25.35    0.74
  -6   0   0   23.53    0.89
   6   0   0   24.72    0.94
  -6   0   0   26.86    0.70
  -6   0   0   25.36    0.91
  -4   3   2  498.24    8.37
   4  -3  -2  488.85    8.42
  -4   3   2  491.52    8.48
  -4  -3   2  473.67    8.37
   4   3  -2  506.62    8.52
  -4  -3   2  492.26    8.45
   4  -3  -2  481.92    8.27
   2   0   4  585.37    9.99
  -2   0  -4  576.85   10.12
   2   0   4  596.09   10.11
   2   0   4  585.64    9.63
  -2   0  -4  611.78    9.68
  -1   1   5  743.22   12.16
  -1   1   5  729.59   12.19
   1  -1  -5  744.39   12.28
  -1  -1   5  734.55   12.02
  -1  -1   5  725.21   11.75
   1  -1  -5  750.23   12.16
  -1  -1   5  718.70   12.08
  -1   1   5  725.63   12.27
  -1  -1   5  687.45   12.11
   1  -1  -5  763.77   12.38
  -1   1   5  738.64   12.29
  -6   0   4   39.48    1.05
  -6   0   4   39.16    1.04
  -6   0   4   38.36    1.01
   6   0  -4   40.65    1.02
   6   0  -4   38.12    1.03
  -4  -1   5  538.20    8.99
  -4   1   5  551.25    9.42
  -4  -1   5  524.48    8.76
  -4   1   5  546.83    9.13
  -4   1   5  522.88    9.40
  -4   1   5  544.51    8.95
   4   1  -5  539.89    8.97
  -4   3   0  330.79    5.57
  -4   3   0  330.15    5.70
  -4   3   0  341.02    6.02
   4   3   0  330.17    5.68
   4  -3   0  327.87    5.65
   4   3   0  332.49    5.77
  -4   3   0  324.51    5.64
   4  -3   0  328.78    5.58
   4  -3   0  324.18    5.72
   4   3   0  325.41    5.76
  -4  -3   0  325.64    5.77
   4   3   0  308.20    5.21
   0   0   5   -0.05    0.19
   0   0   5    0.06    0.21
   0   0   5   -0.11    0.17
   0   0   5   -0.12    0.33
   0   0  -5    0.40    0.20
   0   0   5    0.15    0.27
  -6   1   0 1225.83   19.86
   6  -1   0 1220.12   20.03
  -6  -1   0 1245.21   20.21
   6  -1   0 1227.41   20.12
  -6   1   0 1207.99   20.08
   6   1   0 1230.70   19.72
  -6   1   0 1218.97   20.13
  -6  -1   0 1244.30   19.65
  -6  -1   0 1189.31   20.10
   6  -1   0 1218.45   19.96
  -2   1  -4 2499.95   39.77
   2   1   4 2500.56   39.58
   2   1   4 2384.17   39.90
   2  -1   4 2489.60   39.55
  -2   1  -4 2554.23   39.54
   2  -1   4 2495.03   39.74
   2   1   4 2469.03   39.91
   2  -1   4 2453.24   39.26
  -2  -1  -4 2487.84   39.66
   2   1   4 2493.71   39.62
   2  -1   4 2534.98   39.97
   2   1   4 2323.94   39.50
  -5   0   5    0.13    0.23
   5   0  -5   -0.06    0.17
  -5   0   5    0.11    0.20
   5   0  -5    0.01    0.13
  -5   0   5    0.09    0.20
   0   4   0  284.55    5.13
   0   4   0  282.56    4.92
   0   4   0  284.07    4.86
   0  -4   0  286.54    5.01
   0  -4   0  279.32    5.36
   0  -4   0  286.24    4.99
   0  -4   0  274.91    5.15
  -1   2  -4   14.47    0.62
   1  -2   4   15.38    0.57
   1  -2   4   14.62    0.60
  -1  -2  -4   15.58    0.74
  -1  -2  -4   15.98    0.76
  -1  -2  -4   15.53    0.60
  -1  -2  -4   16.05    0.74
   1   2   4   15.40    0.63
   1   2   4   15.62    0.70
   1   2   4   15.67    0.74
   6  -1  -4    3.44    0.36
  -6   1   4    3.88    0.25
   6   1  -4    4.63    0.40
  -6  -1   4    3.96    0.34
  -6   1   4    3.69    0.37
  -6  -1   4    4.62    0.33
   6  -1  -4    3.67    0.31
   6   1  -4    3.88    0.28
  -6  -1   4    4.32    0.32
  -6   1   4    3.99    0.42
   1   3   3   89.10    2.00
   1   3   3   97.11    2.20
   1  -3   3   95.27    1.89
   1  -3   3   95.08    1.76
  -1   3  -3   92.48    1.90
   1  -3   3   94.73    1.98
   1   3   3   93.48    1.97
  -1  -3  -3  100.90    2.18
  -1   3  -3   97.01    1.93
  -1  -3  -3   96.33    1.95
  -5  -2   4  473.12    8.45
  -5  -2   4  499.79    8.00
  -5  -2   4  493.10    7.98
  -5  -2   4  489.49    8.07
  -5   2   4  496.00    8.46
  -5   2   4  473.43    8.30
  -5   2   4  479.69    8.84
  -5   2   4  486.44    8.69
   5  -2  -4  489.36    8.43
   4   2   2   31.09    0.72
  -4  -2  -2   28.93    1.09
  -4  -2  -2   27.96    1.04
   4   2   2   28.57    0.92
   4  -2   2   26.53    0.87
  -4  -2  -2   29.03    0.94
  -4   2  -2   28.24    0.97
  -4   2  -2   28.10    0.83
   4  -2   2   28.44    0.95
   4   2   2   28.61    0.76
   4   2   2   27.46    1.04
   4  -2   2   29.40    1.03
  -1  -4   0   28.26    0.78
  -1  -4   0   26.37    1.04
   1   4   0   28.56    0.92
  -1   4   0   26.76    0.89
  -1   4   0   27.69    0.78
  -1  -4   0   25.71    0.95
   1  -4   0   26.99    0.74
  -1   4   0   28.18    0.84
  -1  -4   0   28.73    0.90
   1  -4   0   28.53    0.94
   1   4   0   26.64    0.74
   1  -4   0   25.41    1.04
   1  -4   0   26.29    0.85
   1   4   0   25.98    0.71
   1  -4   0   27.57    0.82
  -1   4   0   26.70    1.02
  -4  -3   3  752.73   12.03
  -4  -3   3  751.05   12.60
  -4  -3   3  742.60   12.06
  -4   3   3  765.16   13.01
   4  -3  -3  749.62   12.56
  -4   3   3  745.59   12.55
   4  -3  -3  757.26   12.41
  -4   3   3  745.22   12.45
   4  -3  -3  746.50   12.77
  -6   2   2  650.70   10.50
  -6   2   2  651.12   10.82
  -6  -2   2  669.77   10.94
   6  -2  -2  632.27   10.44
  -6  -2   2  638.52   10.28
   6   2  -2  630.02   10.67
  -6   2   2  654.29   10.87
   6  -2  -2  637.70   10.85
  -6  -2   2  662.03   10.71
   0  -4   1   17.12    0.79
   0  -4  -1   17.29    0.64
   0   4   1   16.73    0.64
   0   4  -1   17.60    0.59
   0  -4   1   16.41    0.50
   0   4  -1   17.21    0.54
   0  -4  -1   17.94    0.64
   0  -4   1   17.08    0.62
   0   4   1   16.78    0.63
   0  -4   1   16.50    0.68
   0  -4  -1   17.27    0.79
   0   4   1   16.84    0.58
   0   4  -1   16.99    0.67
   0  -4  -1   16.63    0.86
   0  -4   1   17.24    0.70
  -1   4   1  729.16   11.90
   1   4  -1  730.42   12.00
  -1  -4   1  717.19   12.00
  -1   4   1  718.79   11.81
   1  -4  -1  742.31   11.82
  -1  -4   1  718.85   12.20
   1   4  -1  691.83   11.64
   1  -4  -1  726.38   12.12
   1  -4  -1  725.27   11.95
   1   4  -1  723.38   11.72
  -1  -4   1  694.58   11.79
   1  -4  -1  706.87   12.35
  -1  -4   1  725.71   12.01
  -1   4   1  722.02   11.83
  -1   4   1  726.63   12.09
   0  -1   5   46.96    1.14
   0  -1  -5   48.82    1.30
   0   1   5   47.68    1.39
   0   1   5   47.36    1.29
   0   1  -5   47.96    1.17
   0  -1   5   50.39    1.29
   0  -1   5   48.88    1.17
   0  -1  -5   49.98    1.34
   5   0   2 2544.21   41.91
   5   0   2 2615.47   41.55
  -5   0  -2 2587.54   41.49
  -5   0  -2 2633.14   41.49
  -5   0  -2 2634.00   42.03
  -5   0  -2 2543.49   41.93
   5  -2   1   47.87    1.32
  -5  -2  -1   46.54    1.35
   5   2   1   43.74    1.29
   5   2   1   45.62    1.33
  -5  -2  -1   48.30    0.97
  -5  -2  -1   47.46    1.29
   5   2   1   48.67    0.98
  -5  -2  -1   46.96    1.44
  -5   2  -1   46.16    1.17
   5  -2   1   48.82    1.33
   5  -2   1   41.58    1.21
  -5  -1   5   30.99    0.96
   5  -1  -5   28.00    0.82
  -5   1   5   28.75    0.86
  -5  -1   5   27.19    0.74
  -5   1   5   30.17    0.97
  -5  -1   5   28.29    0.85
   5   1  -5   30.46    0.84
  -3   2  -3   37.45    0.98
  -3   2  -3   35.62    1.11
   3  -2   3   36.14    1.02
  -3  -2  -3   38.64    1.14
   3  -2   3   34.92    1.20
   3   2   3   37.48    0.97
   3   2   3   38.08    1.11
   3   2   3   37.21    1.22
   3   2   3   37.82    0.91
   3  -2   3   37.57    1.09
   3   2   3   35.22    1.22
   6  -2  -1 1305.99   21.24
  -6  -2   1 1288.00   20.88
  -6   2   1 1322.33   21.49
  -6   2   1 1361.91   21.27
  -6   2   1 1340.26   21.36
  -6  -2   1 1360.42   21.42
   6  -2  -1 1377.42   21.52
   6   2  -1 1340.59   21.39
   7   0  -2  215.19    4.03
  -7   0   2  212.64    4.02
  -7   0   2  215.50    3.83
  -7   0   2  211.78    4.02
   7   0  -2  211.76    3.92
   7   0  -2  217.42    3.90
   4   0   3   -0.01    0.17
   4   0   3    0.02    0.27
  -4   0  -3    0.14    0.29
   4   0   3    0.04    0.18
  -4   0  -3    0.01    0.19
  -4   0  -3    0.07    0.21
  -6  -2   3  799.27   13.23
   6  -2  -3  836.65   13.46
  -6   2   3  774.87   13.00
  -6   2   3  813.77   13.49
  -6  -2   3  819.36   13.03
   6  -2  -3  806.79   12.97
   6   2  -3  843.69   13.21
  -6  -2   3  833.74   13.54
  -6   2   3  813.86   13.50
  -7   0   3   -0.02    0.27
  -7   0   3    0.03    0.23
   7   0  -3    0.35    0.23
   7   0  -3    0.02    0.20
  -7   0   3   -0.05    0.20
   7   0  -3    0.07    0.22
  -2   2   5  266.41    5.00
  -2   2   5  263.56    4.71
  -2  -2   5  259.49    4.49
   2   2  -5  269.52    4.59
  -2  -2   5  267.00    4.57
   2  -2  -5  261.63    4.77
   2  -2  -5  265.05    5.07
  -2   2   5  256.47    5.00
  -3  -2   5   78.42    1.68
   3  -2  -5   80.53    1.87
  -3  -2   5   80.85    1.63
  -3   2   5   77.99    1.86
  -3   2   5   75.78    1.69
  -3  -2   5   80.05    1.42
  -3   2   5   81.80    2.04
  -3   2   5   79.57    1.71
  -3   2   5   78.93    2.06
  -3  -2   5   80.01    1.54
  -1   4  -1    4.90    0.37
   1  -4   1    4.64    0.49
  -1   4  -1    4.98    0.37
   1  -4   1    4.30    0.36
  -1   4  -1    5.37    0.49
  -1  -4  -1    6.82    0.44
  -1  -4  -1    5.19    0.34
  -1  -4  -1    4.49    0.46
   1  -4   1    4.97    0.41
   1  -4   1    5.16    0.30
  -1  -4  -1    5.17    0.53
   1  -4   1    4.87    0.37
   1   4   1    4.83    0.40
   1   4   1    4.69    0.35
   2  -4  -1   80.44    1.91
  -2  -4   1   77.68    1.56
   2  -4  -1   79.40    1.83
   2   4  -1   77.11    1.50
  -2  -4   1   76.14    1.83
   2  -4  -1   75.52    1.59
   2   4  -1   76.68    1.49
  -2   4   1   76.95    1.85
  -2   4   1   84.88    1.73
   2   4  -1   76.86    1.81
  -2  -4   1   77.29    1.83
   2  -4  -1   80.37    1.67
   2  -4  -1   78.51    2.11
  -2   4   1   78.58    1.76
   2   4  -1   81.22    1.87
  -2  -3   4   64.29    1.36
  -2   3   4   64.52    1.37
   2  -3  -4   66.52    1.45
   2  -3  -4   65.03    1.59
  -2   3   4   61.68    1.48
  -2   3   4   65.80    1.75
   2   3  -4   65.09    1.36
  -2   3   4   63.53    1.85
   2  -3  -4   64.62    1.79
   3   3   2    6.76    0.51
   3   3   2    5.52    0.47
  -3   3  -2    5.90    0.44
  -3   3  -2    6.89    0.46
   3   3   2    5.77    0.48
   3  -3   2    6.34    0.40
   3   3   2    5.95    0.34
   3  -3   2    4.97    0.27
   3  -3   2    5.67    0.42
   2   4   0    0.11    0.17
  -2  -4   0    0.10    0.24
   2  -4   0    0.24    0.25
  -2  -4   0    0.28    0.30
   2   4   0   -0.04    0.28
   2  -4   0   -0.01    0.16
  -2  -4   0    0.25    0.17
  -2   4   0   -0.06    0.33
  -2   4   0   -0.09    0.26
  -2   4   0    0.32    0.23
   2  -4   0    0.30    0.20
  -2   4   0    0.49    0.22
   2  -4   0    1.33    0.29
   2  -4   0    0.03    0.39
   5   3  -2  296.08    5.27
  -5   3   2  294.48    5.21
  -5  -3   2  281.66    5.21
  -5  -3   2  306.82    4.97
   5  -3  -2  293.59    5.28
   5  -3  -2  293.56    5.15
  -5  -3   2  294.04    5.26
  -5   3   2  294.16    5.29
   5   3  -2  303.95    4.91
   5  -3  -2  263.00    4.68
  -5   3   2  265.54    5.15
  -4   3  -1  194.41    3.79
   4  -3   1  185.10    3.62
  -4   3  -1  191.79    3.52
   4  -3   1  190.99    3.61
  -4   3  -1  192.71    3.61
   4   3   1  182.38    3.66
   4   3   1  187.36    3.65
   4   3   1  186.63    3.68
   4   3   1  186.19    3.24
   4  -3   1  186.79    3.57
   5  -1   2   50.41    1.46
  -5   1  -2   48.59    1.16
   5  -1   2   46.53    1.36
   5   1   2   45.56    1.47
  -5   1  -2   48.93    1.01
  -5  -1  -2   47.71    1.22
  -5   1  -2   48.64    1.44
  -5  -1  -2   49.52    1.11
  -5  -1  -2   46.58    1.41
   5   1   2   46.27    1.41
  -5  -1  -2   45.86    1.50
   5   1   2   50.40    1.11
  -6   0  -1   -0.20    0.22
   6   0   1    0.08    0.20
   6   0   1    0.22    0.47
  -6   0  -1   -0.08    0.30
  -6   0  -1    0.09    0.16
  -6   0  -1    0.16    0.29
   6   0   1    0.05    0.25
   1  -3  -4   29.69    0.93
  -1   3   4   30.05    1.09
  -1  -3   4   28.31    0.67
  -1  -3   4   29.16    0.80
   1   3  -4   29.25    0.79
   1  -3  -4   28.10    1.06
  -1  -3   4   28.11    0.75
  -1   3   4   29.64    1.14
  -1   3   4   29.27    0.94
   1  -3  -4   26.85    0.92
   1   3  -4   27.31    0.69
  -1   3   4   29.95    0.89
  -5  -3   1  203.79    3.92
   5   3  -1  205.29    3.92
   5  -3  -1  210.64    3.93
   5  -3  -1  209.62    3.61
  -5  -3   1  210.50    3.80
  -5   3   1  198.97    3.85
  -5   3   1  209.33    4.27
   5  -3  -1  205.65    3.84
  -5  -3   1  204.75    3.97
  -5   3   1  200.78    3.86
  -3   3   4 1357.31   21.68
  -3   3   4 1353.45   22.07
   3  -3  -4 1331.99   22.07
  -3  -3   4 1309.30   21.90
  -3   3   4 1419.43   21.33
   3   3  -4 1317.83   21.41
  -3   3   4 1301.35   22.21
   3  -3  -4 1345.00   21.83
  -3  -3   4 1228.59   21.41
   7   0  -1   -0.10    0.27
   7   0  -1    0.57    0.22
  -7   0   1    0.15    0.30
  -7   0   1    0.30    0.31
  -7   0   1    0.07    0.20
  -7   1   2   63.58    1.50
   7  -1  -2   65.69    1.43
  -7  -1   2   64.97    1.57
  -7  -1   2   66.18    1.30
  -7   1   2   58.79    1.48
   7   1  -2   66.73    1.59
   7  -1  -2   62.84    1.56
  -7  -1   2   61.12    1.61
  -7   1   2   63.95    1.61
   7   1  -2   64.57    1.37
   7   1  -2   65.30    1.56
   4  -1   3  577.53    9.96
  -4   1  -3  555.73    9.63
  -4  -1  -3  584.61   10.08
  -4   1  -3  582.27    9.39
  -4  -1  -3  583.65   10.19
   4   1   3  567.81    9.69
  -4  -1  -3  598.76    9.60
  -4  -1  -3  586.73    9.75
   4   1   3  583.80    9.59
   4   1   3  587.15   10.07
   4   1   3  575.24   10.07
  -4   1  -3  576.04   10.11
  -1   4   2  376.10    6.39
  -1  -4   2  354.87    6.21
  -1  -4   2  371.09    6.53
  -1  -4   2  355.06    6.37
  -1   4   2  360.20    6.20
   1  -4  -2  365.60    6.38
  -1  -4   2  376.62    6.53
   1   4  -2  365.83    6.34
   1   4  -2  380.11    6.07
   1  -4  -2  352.01    6.82
  -1   4   2  382.65    6.84
   1  -4  -2  346.43    6.19
  -1   4   2  379.66    6.30
   1  -4  -2  357.79    6.62
   1   4  -2  360.51    6.13
  -1   2   5    0.07    0.27
   1  -2  -5    0.07    0.21
   1   2  -5   -0.01    0.20
  -1  -2   5    0.98    0.20
  -1   2   5    0.45    0.30
   1  -2  -5    0.85    0.29
   1  -2  -5    0.08    0.35
  -1   2   5    0.07    0.27
   1  -2  -5    0.02    0.32
  -1  -2   5    0.17    0.16
   1   0   5    0.07    0.17
   1   0   5   -0.06    0.17
   1   0   5    0.18    0.36
  -1   0  -5    0.10    0.25
  -1   0  -5    0.01    0.21
   1   0   5   -0.05    0.25
  -4   2   5  591.64    9.66
  -4   2   5  614.27   10.29
  -4  -2   5  584.62    9.72
  -4  -2   5  567.89    9.45
  -4  -2   5  590.54    9.65
  -4   2   5  593.65    9.99
   4  -2  -5  601.28   10.00
  -4   2   5  596.54    9.84
  -4   2   5  595.97   10.40
   7   1  -3  169.24    3.01
  -7   1   3  166.51    3.06
   7  -1  -3  164.96    2.99
   7  -1  -3  164.14    3.25
  -7  -1   3  163.51    3.16
  -7   1   3  170.58    3.29
  -7  -1   3  155.99    2.98
  -7   1   3  165.08    3.20
  -7  -1   3  170.04    3.27
   7   1  -3  166.23    3.22
   7   1  -3  175.09    3.17
  -6   0   5    0.15    0.20
  -6   0   5    0.12    0.26
   6   0  -5    0.10    0.19
  -6   0   5    0.26    0.20
   6   0  -5    0.02    0.17
   0  -4   2   58.53    1.39
   0  -4   2   58.28    1.37
   0   4  -2   56.25    1.28
   0  -4   2   57.33    1.48
   0  -4   2   56.19    1.51
   0   4  -2   58.80    1.24
   0  -4   2   59.82    1.19
   0   4   2   55.73    1.35
   0  -4  -2   56.91    1.39
   0  -4  -2   56.53    1.58
   0  -4  -2   59.44    1.42
   0   4   2   58.93    1.41
   0  -4  -2   57.96    1.75
   0   4   2   59.40    1.32
   0   4   2   52.25    1.54
   0   4  -2   58.22    1.35
  -2   4   2   61.03    1.83
   2  -4  -2   60.32    1.86
  -2   4   2   55.89    1.60
  -2   4   2   59.13    1.46
  -2   4   2   62.90    1.31
  -2  -4   2   61.15    1.54
   2  -4  -2   61.67    1.31
   2   4  -2   60.61    1.24
  -2   4   2   62.86    1.53
   2  -4  -2   62.62    1.68
  -2  -4   2   62.15    1.32
   2   4  -2   61.04    1.18
  -3   0  -4  380.11    6.26
   3   0   4  364.34    6.19
  -3   0  -4  371.22    6.77
   3   0   4  375.18    6.81
   3   0   4  364.04    6.66
  -3   0  -4  353.55    6.28
  -2   3  -3  300.16    5.25
   2  -3   3  287.17    4.87
  -2  -3  -3  313.72    5.55
   2   3   3  290.01    5.35
  -2  -3  -3  300.25    5.17
   2   3   3  301.56    5.47
   2   3   3  298.04    5.18
   2  -3   3  300.41    5.21
   2  -3   3  296.81    5.27
   6   2   0  155.43    3.17
   6  -2   0  163.43    3.10
  -6   2   0  148.17    3.17
   6  -2   0  154.81    3.20
  -6   2   0  156.14    3.10
  -6   2   0  153.82    3.04
  -6  -2   0  154.97    3.14
   6   2   0  155.94    3.22
  -6  -2   0  152.06    3.33
  -6  -2   0  154.42    3.19
  -6  -2   0  164.94    2.70
   6   1   1  118.27    2.25
  -6   1  -1  120.43    2.35
  -6  -1  -1  122.61    2.76
   6  -1   1  120.36    2.64
  -6   1  -1  123.02    2.66
  -6   1  -1  117.26    2.64
   6  -1   1  120.85    2.62
  -6  -1  -1  119.49    2.21
  -6  -1  -1  118.15    2.43
   6  -1   1  119.36    2.44
  -6  -1  -1  121.91    2.66
  -5  -3   3  581.97    9.45
   5  -3  -3  618.83   10.14
  -5   3   3  583.46   10.00
  -5   3   3  598.86   10.08
  -5  -3   3  598.51   10.13
  -5   3   3  614.46   10.58
  -5   3   3  611.69   10.28
   5  -3  -3  609.13    9.99
   5   3  -3  599.96   10.15
  -5  -3   3  601.53    9.62
  -5  -3   3  572.61    9.48
   2  -2   4   14.90    0.64
   2   2   4   15.72    0.57
  -2  -2  -4   14.58    0.78
   2   2   4   15.36    0.62
   2   2   4   16.14    0.82
   2   2   4   15.11    0.79
   2   2   4   15.24    0.69
  -2   2  -4   13.80    0.57
  -2   2  -4   14.42    0.42
   2  -2   4   15.73    0.62
  -2   2  -4   14.48    0.68
  -2  -2  -4   14.44    0.70
  -7   0   4  106.17    2.27
  -7   0   4  108.80    2.29
   7   0  -4  109.26    2.25
  -7   0   4  113.87    2.23
   7   0  -4  111.93    2.27
   7   0  -4  113.17    2.25
  -7  -1   1  493.24    8.26
   7  -1  -1  497.79    8.75
   7  -1  -1  496.37    8.61
   7   1  -1  524.73    8.70
  -7   1   1  503.35    8.65
  -7   1   1  499.39    8.73
  -7  -1   1  498.76    8.83
   7   1  -1  497.51    8.37
  -7  -1   1  507.69    8.69
   7   1  -1  524.21    8.71
   7  -1  -1  524.09    8.59
  -7   1   1  505.79    8.50
   0  -3  -4    2.48    0.47
   0  -3  -4    1.99    0.27
   0  -3   4    2.31    0.26
   0   3   4    2.67    0.35
   0   3  -4    2.33    0.26
   0   3   4    2.79    0.44
   0  -3  -4    2.43    0.37
   0   3  -4    2.12    0.25
   0  -3   4    2.53    0.25
   0  -3   4    2.29    0.22
   0   3   4    2.43    0.37
   0  -3   4    2.79    0.24
   2  -4   1    2.78    0.32
   2   4   1    2.92    0.39
  -2  -4  -1    2.62    0.41
   2  -4   1    2.80    0.46
  -2   4  -1    2.70    0.40
   2  -4   1    2.65    0.27
  -2   4  -1    2.58    0.32
  -2   4  -1    2.21    0.28
   2   4   1    2.86    0.38
   2  -4   1    3.60    0.37
  -2  -4  -1    2.21    0.35
  -2   4  -1    3.86    0.35
   2   4   1    2.71    0.29
  -2  -4  -1    2.18    0.24
  -3   0   6 1539.19   25.44
  -3   0   6 1587.25   25.41
  -3  -4   1 1416.39   22.69
   3  -4  -1 1389.37   22.81
   3  -4  -1 1424.08   22.99
   3   4  -1 1462.83   23.25
   3  -4  -1 1411.59   23.18
  -3   4   1 1407.43   23.51
   3  -4  -1 1426.71   23.21
   3   4  -1 1441.74   22.64
   3   4  -1 1427.45   22.95
  -3   4   1 1417.65   23.06
   3  -4  -1 1424.87   23.61
  -3  -4   1 1400.53   23.21
  -3   4   1 1443.83   23.18
  -3   4   1 1350.62   23.07
   1  -1   5    2.85    0.36
   1   1   5    2.17    0.45
   1   1   5    2.70    0.33
   1  -1   5    2.93    0.25
   1   1   5    3.20    0.41
  -1   1  -5    3.38    0.32
   1  -1   5    2.45    0.42
  -1  -1  -5    3.65    0.45
   1  -1   5    2.60    0.28
  -1  -1  -5    3.35    0.39
  -1   1  -5    2.30    0.15
  -1  -1  -5    3.06    0.38
  -1   1  -5    2.88    0.39
  -6  -2   4  113.74    2.05
  -6  -2   4  114.43    2.04
   6   2  -4  117.30    2.41
   6   2  -4  113.73    2.00
  -6   2   4  115.78    2.41
  -6  -2   4  114.50    2.39
  -6   2   4  112.58    2.34
   6   2  -4  116.81    2.01
  -4  -3   4   90.09    1.81
  -4   3   4   93.89    2.49
   4  -3  -4   95.21    2.01
   4  -3  -4   95.53    2.17
  -4   3   4   95.91    2.05
  -4   3   4   95.56    2.17
  -4  -3   4   96.95    2.24
  -4  -3   4   97.23    1.75
   5   3   0   23.89    0.52
  -5  -3   0   25.78    0.99
   5  -3   0   24.87    0.91
  -5   3   0   23.67    0.77
   5  -3   0   25.49    0.83
   5   3   0   27.18    0.90
  -5   3   0   24.58    0.84
   5  -3   0   25.03    0.88
   5   3   0   24.03    0.91
  -5   3   0   23.95    0.89
  -6  -1   5    2.61    0.30
   6  -1  -5    2.92    0.35
  -6   1   5    2.56    0.40
  -6  -1   5    2.75    0.27
  -6   1   5    2.73    0.34
   6   1  -5    2.52    0.24
   6   1  -5    3.69    0.29
  -6  -1   5    2.90    0.33
   6  -1  -5    2.72    0.30
  -6   1   5    2.82    0.25
  -2   0   6   65.54    1.67
  -2   0   6   61.79    1.48
  -2   0   6   62.20    1.54
  -2   0   6   64.92    1.50
  -4   0   6   77.06    1.83
  -4   0   6   81.17    1.66
  -3  -1  -4 1534.07   26.27
  -3   1  -4 1662.30   25.51
   3  -1   4 1578.33   25.44
   3  -1   4 1606.28   25.81
   3   1   4 1681.92   25.76
  -3   1  -4 1570.11   26.06
   3   1   4 1575.13   26.23
  -3  -1  -4 1561.50   25.88
   3  -1   4 1602.70   26.07
   3   1   4 1568.27   26.21
   3   1   4 1568.76   25.81
  -3   1  -4 1562.20   25.77
   3  -1   4 1587.26   26.26
   3  -4   0   73.00    1.65
   3   4   0   71.18    1.73
  -3   4   0   72.80    1.96
  -3  -4   0   70.09    1.79
  -3   4   0   73.06    1.70
   3   4   0   75.51    1.86
   3   4   0   71.22    1.76
  -3   4   0   70.95    1.70
   3  -4   0   73.18    2.01
   3  -4   0   75.28    1.74
   3   4   0   77.47    1.44
  -3   4   0   72.77    1.71
  -3  -4   0   73.08    1.85
  -3  -4   0   76.48    1.44
   3  -4   0   81.21    1.83
  -1  -4  -2  253.11    4.44
  -1  -4  -2  254.27    4.62
  -1   4  -2  248.45    4.40
   1   4   2  256.33    4.78
  -1  -4  -2  257.18    4.80
   1  -4   2  248.94    4.52
  -1   4  -2  251.30    4.38
  -1  -4  -2  255.10    4.99
   1  -4   2  240.21    4.32
   1   4   2  252.74    4.45
   1  -4   2  248.63    4.43
   1   4   2  252.38    4.53
  -1   4  -2  241.56    4.38
   1  -4   2  240.35    4.67
   0   2  -5 1063.95   17.53
   0   2   5 1029.62   17.59
   0  -2  -5 1106.25   17.81
   0  -2  -5 1086.79   17.58
   0  -2   5 1079.04   17.45
   0  -2   5 1072.38   17.47
   0   2   5 1041.83   17.70
   0  -2  -5 1083.45   17.85
   0   2   5 1077.15   17.80
   0  -2  -5 1072.52   17.80
   3   4  -2  116.65    2.13
  -3   4   2  120.99    2.58
   3   4  -2  124.14    2.67
   3  -4  -2  124.42    2.63
  -3  -4   2  126.12    2.24
  -3  -4   2  121.69    2.60
  -3   4   2  128.75    2.75
   3   4  -2  128.38    2.17
   3  -4  -2  117.79    2.96
  -3   4   2  123.49    2.53
   3  -4  -2  130.41    2.79
   3  -4  -2  123.16    2.45
  -7   1   4  187.36    3.30
   7  -1  -4  188.81    3.30
   7  -1  -4  191.25    3.55
  -7   1   4  184.14    3.56
   7   1  -4  170.55    3.33
   7   1  -4  196.17    3.60
  -7   1   4  185.38    3.58
   7  -1  -4  184.33    3.57
  -7  -1   4  191.51    3.55
  -7  -1   4  179.05    3.41
  -7  -1   4  181.45    3.37
   7   1  -4  187.75    3.40
  -5  -2   5    0.27    0.20
  -5   2   5    0.29    0.25
  -5   2   5    0.25    0.15
  -5   2   5    0.27    0.31
  -5  -2   5    0.98    0.30
   5  -2  -5   -0.11    0.24
  -5   2   5   -0.28    0.36
  -5   2   5    0.14    0.37
  -5  -2   5    0.15    0.12
  -3   1   6  682.07   11.49
  -3   1   6  691.97   11.52
   3  -1  -6  698.78   11.49
  -3  -1   6  684.07   11.31
  -3   1   6  696.47   11.77
  -3  -1   6  679.59   11.39
  -7   0   0  942.53   15.92
   7   0   0  980.33   15.87
  -7   0   0  954.85   15.51
   7   0   0  955.50   15.63
  -7   0   0  933.99   15.95
   2  -1  -6  120.99    2.48
  -2   1   6  119.63    2.61
  -2   1   6  115.69    2.51
  -2  -1   6  115.05    2.18
  -2   1   6  119.67    2.54
  -2  -1   6  120.96    2.33
  -2  -1   6  113.81    2.40
  -2   1   6  120.90    2.49
  -4  -1   6    1.86    0.24
  -4   1   6    1.62    0.34
  -4   1   6    1.96    0.41
  -4   1   6    2.91    0.42
  -4  -1   6    2.06    0.20
  -4  -1   6    2.85    0.32
  -4   1   6    1.89    0.27
  -1   0   6  931.02   15.38
  -1   0   6  904.97   15.18
  -1   0   6  882.02   15.43
  -1   0   6  946.12   15.26
  -1   0   6  917.95   15.08
   5   2   2  186.58    3.88
   5   2   2  209.51    3.42
  -5  -2  -2  192.33    3.74
   5   2   2  195.35    3.71
   5  -2   2  202.12    3.92
  -5  -2  -2  201.78    3.97
  -5  -2  -2  191.96    4.06
   5  -2   2  193.59    3.81
  -5   2  -2  197.66    3.87
  -5   2  -2  196.64    3.59
  -5   0   6 1242.18   20.20
   5   0  -6 1246.47   20.39
  -5   0   6 1257.53   20.42
   1  -4  -3  733.41   12.44
  -1  -4   3  693.50   11.90
  -1  -4   3  730.52   12.14
   1   4  -3  723.37   11.71
  -1  -4   3  725.89   12.01
  -1  -4   3  738.18   11.64
  -1   4   3  734.45   12.62
  -1   4   3  727.35   11.90
   1  -4  -3  695.71   12.61
  -1   4   3  723.52   11.99
   1   4  -3  714.56   11.82
  -1   4   3  732.72   12.39
  -1   4   3  736.74   12.12
   1  -4  -3  699.26   12.00
   1  -4  -3  727.26   12.12
  -2   4   3   11.66    0.44
  -2  -4   3   11.68    0.59
  -2   4   3   13.57    0.68
   2  -4  -3   10.58    0.81
  -2   4   3    9.60    0.54
   2  -4  -3   10.86    0.59
   2   4  -3   10.79    0.41
   2  -4  -3   12.24    0.75
   2  -4  -3   12.03    0.52
  -2   4   3   11.26    0.79
   2   4  -3   10.61    0.31
  -2  -4   3   12.50    0.47
   7  -2  -2   72.25    1.51
  -7  -2   2   71.96    1.84
  -7   2   2   74.19    1.76
  -7   2   2   74.51    1.59
  -7  -2   2   76.96    1.74
  -7  -2   2   73.91    1.31
   7   2  -2   74.76    1.70
  -7   2   2   72.48    1.83
   7  -2  -2   71.48    1.80
   4  -2   3  350.93    6.32
   4   2   3  370.42    5.99
  -4  -2  -3  355.55    6.30
   4   2   3  349.24    6.47
  -4   2  -3  357.43    6.10
  -4   2  -3  357.84    6.35
   4  -2   3  350.20    6.19
   4  -2   3  349.45    6.50
   4   2   3  355.35    6.06
   4   2   3  353.55    6.25
  -1   3  -4  230.30    4.20
   1   3   4  235.96    4.33
   1  -3   4  237.88    4.21
  -1   3  -4  238.63    4.26
   1  -3   4  235.56    3.96
   1  -3   4  238.45    4.28
  -1  -3  -4  245.91    4.76
  -1  -3  -4  243.82    4.61
  -1  -3  -4  238.87    4.30
   1   3   4  234.66    4.58
  -7  -1   0   15.01    0.76
   7  -1   0   17.12    0.79
   7   1   0   16.04    0.75
  -7  -1   0   16.89    0.84
  -7  -1   0   15.05    0.48
  -7   1   0   15.08    0.74
   7  -1   0   14.37    0.79
  -7  -1   0   15.12    0.68
  -7   1   0   15.54    0.60
   7   1   0   15.44    0.74
   7   1   0   15.30    0.55
   7  -1   0   15.36    0.66
  -5  -3   4  159.31    2.83
  -5   3   4  160.90    3.18
   5  -3  -4  169.08    3.31
  -5   3   4  165.23    3.32
   5  -3  -4  164.51    3.15
  -5  -3   4  160.36    3.31
  -5   3   4  152.28    3.70
  -5  -3   4  159.78    2.77
   4  -3   2  327.72    5.93
   4   3   2  338.00    5.58
  -4  -3  -2  310.51    6.03
  -4   3  -2  335.96    5.98
   4  -3   2  327.28    5.93
   4   3   2  318.96    6.01
   4   3   2  335.33    5.66
   4   3   2  335.10    6.14
   4   3   2  336.02    6.04
  -4   3  -2  330.32    5.83
   4  -3   2  339.37    6.09
  -4   3  -2  352.82    6.09
  -7  -2   3  149.96    3.07
   7   2  -3  151.61    2.85
   7   2  -3  145.36    3.04
  -7  -2   3  148.44    2.56
  -7   2   3  147.24    2.66
  -7  -2   3  142.45    2.84
   7  -2  -3  138.24    2.97
  -7   2   3  142.72    3.00
  -7   2   3  146.83    3.04
   7  -2  -3  153.45    2.61
   2   0   5    0.87    0.21
  -2   0  -5    0.12    0.24
   2   0   5    0.08    0.26
  -2   0  -5   -0.06    0.22
   2   0   5    0.06    0.40
  -6  -3   2  514.25    8.95
   6   3  -2  513.64    8.69
  -6  -3   2  515.84    8.73
  -6  -3   2  533.46    9.04
  -6   3   2  541.46    9.05
   6  -3  -2  521.06    9.03
   6   3  -2  521.80    9.01
  -6   3   2  504.78    8.95
   6  -3  -2  510.39    8.89
  -6   3   2  520.51    8.91
   6  -3  -2  510.52    8.44
  -3   4  -1 1674.85   26.80
  -3   4  -1 1579.98   26.73
   3   4   1 1652.80   26.99
   3  -4   1 1666.81   26.90
   3   4   1 1676.84   26.53
  -3  -4  -1 1618.66   27.05
   3  -4   1 1628.49   26.69
  -3  -4  -1 1659.47   26.48
   3   4   1 1679.11   27.00
  -3   4  -1 1677.96   27.09
   3   4   1 1678.60   26.92
   3  -4   1 1663.68   26.73
  -3  -4  -1 1588.75   26.92
  -3   4  -1 1687.30   26.65
  -4  -4   1    8.13    0.60
   4  -4  -1    8.87    0.58
  -4   4   1    9.67    0.71
   4  -4  -1    9.19    0.39
   4   4  -1    9.60    0.60
   4  -4  -1    8.77    0.57
   4   4  -1    7.77    0.45
   4   4  -1    8.79    0.24
   4  -4  -1    8.60    0.47
  -4   4   1    9.47    0.55
  -4  -4   1    8.83    0.26
  -4   4   1    9.25    0.56
  -1  -1   6  397.72    6.71
  -1   1   6  389.97    7.00
   1  -1  -6  387.96    6.92
  -1   1   6  386.37    6.82
  -1  -1   6  373.84    6.75
  -1  -1   6  382.73    6.79
  -1   1   6  396.33    6.74
  -1  -1   6  387.09    6.82
  -1   1   6  385.40    6.97
   0   4  -3    8.40    0.38
   0  -4  -3    8.06    0.55
   0  -4   3    7.92    0.33
   0   4   3    7.80    0.51
   0   4  -3    7.55    0.41
   0  -4  -3    7.70    0.46
   0   4   3    8.13    0.47
   0  -4   3    7.43    0.44
   0  -4  -3    7.53    0.60
   0  -4   3    7.53    0.49
   0  -4  -3    7.18    0.67
   0   4   3    7.58    0.58
   0  -4   3    7.90    0.43
   3  -4  -3  616.61   10.69
  -3  -4   3  614.78   10.35
  -3   4   3  623.00   10.43
   3   4  -3  608.43    9.93
   3  -4  -3  599.64   10.95
   3  -4  -3  616.36   10.44
  -3  -4   3  628.98   10.01
  -3   4   3  601.74    9.93
   2  -4   2    9.16    0.61
   2  -4   2   10.10    0.46
  -2   4  -2   10.44    0.59
   2  -4   2    8.61    0.45
  -2  -4  -2    9.95    0.64
  -2  -4  -2    9.22    0.43
   2  -4   2    9.67    0.54
  -2   4  -2    9.09    0.49
   2   4   2    8.51    0.54
  -2  -4  -2    9.35    0.70
  -2  -4  -2    9.19    0.62
  -2   4  -2    8.94    0.50
  -2   4  -2    9.12    0.42
   2   4   2    9.13    0.62
   2   4   2    9.20    0.47
   7   0  -5    0.05    0.16
   7   0  -5    0.12    0.20
  -7   0   5    0.20    0.20
  -7   0   5    0.10    0.28
  -7   0   5   -0.15    0.28
  -6  -2  -1  202.68    3.99
  -6  -2  -1  190.98    3.39
   6   2   1  203.12    3.43
   6  -2   1  203.97    3.91
  -6  -2  -1  197.43    3.80
  -6   2  -1  194.28    3.66
  -6  -2  -1  198.04    4.07
   6  -2   1  198.44    3.92
   6   2   1  188.24    3.86
   6   2   1  201.67    3.94
  -6   2  -1  196.10    3.88
  -5  -1   6  276.52    5.12
   5   1  -6  286.90    5.10
  -5  -1   6  288.96    4.90
  -5   1   6  287.31    5.26
  -5   1   6  286.60    5.59
  -5   1   6  287.25    5.07
   4  -4  -2  112.91    2.34
   4   4  -2  108.24    1.89
   4  -4  -2  116.90    2.57
   4   4  -2  114.13    2.56
  -4   4   2  113.09    2.38
  -4   4   2  112.87    2.52
  -4  -4   2  110.52    2.45
   4  -4  -2  114.34    2.51
  -4  -4   2  111.47    1.96
   5   3   1  746.78   12.57
   5   3   1  745.52   12.58
   5   3   1  756.50   12.03
   5  -3   1  742.32   12.50
   5  -3   1  726.71   12.48
  -5   3  -1  743.56   12.34
  -5  -3  -1  722.31   12.70
   5  -3   1  750.15   12.49
  -5   3  -1  727.58   12.50
   5   3   1  730.36   12.52
  -7   2   1    9.23    0.61
  -7  -2   1    8.43    0.27
  -7  -2   1    8.50    0.57
  -7   2   1    8.32    0.52
  -7   2   1    8.75    0.50
  -7  -2   1    8.96    0.67
   7   2  -1    8.87    0.53
   7  -2  -1    9.42    0.56
   7  -2  -1   11.15    0.62
  -7  -2   1    9.06    0.59
  -5   0  -3   -0.16    0.34
  -5   0  -3    0.07    0.20
  -5   0  -3    0.16    0.33
  -5   0  -3    0.35    0.20
   5   0   3    0.03    0.29
   5   0   3    0.05    0.18
   3  -3   3   83.47    1.98
  -3   3  -3   87.95    2.03
   3   3   3   93.41    1.90
   3   3   3   92.56    1.82
  -3  -3  -3   90.73    2.25
   3   3   3   85.25    2.13
   3   3   3   92.76    2.16
   3  -3   3   90.20    2.02
  -3  -3  -3   93.85    2.20
  -3   3  -3   93.94    1.97
  -6   3   1   68.50    1.76
   6  -3  -1   76.48    1.61
   6  -3  -1   71.21    1.87
  -6   3   1   74.38    1.80
   6  -3  -1   77.25    1.83
  -6  -3   1   72.26    1.90
   6   3  -1   79.71    1.76
  -6  -3   1   73.75    1.87
   6   3  -1   77.53    1.90
  -6  -3   1   75.45    1.79
   6   0   2  791.42   13.69
  -6   0  -2  803.17   13.82
  -6   0  -2  786.46   13.69
   6   0   2  807.64   13.31
  -6   0  -2  805.91   13.24
  -6   0  -2  830.53   13.25
   1   2   5   24.31    0.94
   1  -2   5   26.12    0.65
   1  -2   5   25.42    0.87
   1   2   5   26.66    0.90
   1   2   5   24.51    1.08
   1  -2   5   25.87    0.84
  -1   2  -5   23.37    0.87
  -1  -2  -5   26.95    1.07
   1   2   5   27.85    0.85
  -1  -2  -5   22.90    1.01
   1   2   5   27.41    1.05
  -1  -2  -5   24.03    0.97
  -6   3   3 2729.05   43.29
   6  -3  -3 2678.95   43.36
  -6   3   3 2744.00   43.52
  -6  -3   3 2755.58   42.92
  -6   3   3 2729.52   43.92
   6   3  -3 2718.27   42.86
  -6  -3   3 2713.95   43.39
   6  -3  -3 2672.06   43.21
  -6   3   3 2731.95   43.31
   8   0  -3    0.39    0.25
   8   0  -3    0.99    0.26
  -8   0   3    1.32    0.30
  -8   0   3    0.02    0.29
   8   0  -3    0.02    0.25
  -8   0   3    0.23    0.30
   2  -3  -5   52.36    1.37
   2   3  -5   55.48    1.26
   2  -3  -5   52.36    1.74
  -2   3   5   55.49    1.64
  -2   3   5   55.66    1.71
  -2   3   5   53.96    1.34
   2  -3  -5   58.18    1.50
  -2   3   5   54.21    1.33
  -2  -3   5   55.18    1.26
  -2  -3   5   53.50    1.06
   8   0  -2   22.01    0.81
   8   0  -2   21.59    0.86
  -8   0   2   20.86    0.89
  -8   0   2   21.17    0.70
  -8   0   2   20.05    0.87
   8   0  -2   22.40    0.78
  -3   3   5  999.62   16.33
   3  -3  -5 1009.66   16.73
   3  -3  -5 1025.04   17.07
  -3   3   5 1013.84   16.55
  -3  -3   5 1003.61   16.34
  -3   3   5  997.57   17.12
   3   3  -5 1005.91   16.36
  -3   3   5 1022.90   17.00
   3  -3  -5  996.72   17.18
   2  -1   5  120.87    2.85
   2   1   5  119.25    2.79
  -2  -1  -5  126.87    2.61
   2   1   5  123.08    2.84
   2   1   5  122.51    2.54
   2  -1   5  125.84    2.25
  -2  -1  -5  125.07    2.59
   2   1   5  125.54    2.54
  -2   1  -5  121.81    2.47
   2  -1   5  124.66    2.48
  -2   1  -5  124.95    2.72
   2  -1   5  125.71    2.69
  -6  -2   5  339.20    5.88
  -6   2   5  345.73    6.24
  -6   2   5  342.45    6.70
  -6   2   5  338.48    6.11
  -6  -2   5  336.98    6.22
  -6   2   5  361.68    6.61
  -6  -2   5  354.83    5.80
  -6   2   5  343.50    5.65
   6   2  -5  341.80    5.70
  -6  -2   5  343.08    5.76
   4  -4   0  224.39    4.17
  -4   4   0  227.89    4.26
   4   4   0  223.57    4.38
  -4   4   0  228.49    4.19
  -4  -4   0  227.70    4.40
   4   4   0  229.37    4.28
   4  -4   0  227.01    4.23
   4  -4   0  222.38    4.33
  -4   4   0  233.14    4.62
   4   4   0  227.97    3.79
   4   4   0  226.95    4.34
  -4  -4   0  223.98    3.77
   3   2   4  195.08    4.03
  -3   2  -4  201.21    3.69
  -3  -2  -4  201.52    3.93
  -3   2  -4  199.20    3.91
   3   2   4  198.48    3.86
   3   2   4  204.97    4.11
   3   2   4  207.99    3.66
   3  -2   4  196.49    3.89
   3   2   4  201.45    3.73
   3  -2   4  195.16    3.75
   0   0   6  412.37    7.35
   0   0   6  423.25    7.33
   0   0   6  411.24    7.66
   0   0  -6  432.97    7.22
   0   0   6  422.04    7.29
   0   0   6  423.91    7.56
   7  -1  -5  844.79   13.81
   7  -1  -5  845.14   13.93
   7   1  -5  829.22   13.67
  -7   1   5  815.16   13.84
   7   1  -5  800.21   13.60
  -7  -1   5  820.57   13.67
  -7   1   5  821.71   13.93
  -7  -1   5  833.53   13.70
  -7  -1   5  824.10   13.85
  -7   2   4   48.11    1.37
   7   2  -4   44.69    1.09
   7   2  -4   46.09    1.01
  -7  -2   4   49.26    1.15
  -7  -2   4   49.88    1.41
  -7   2   4   49.17    1.38
  -7   2   4   43.86    0.95
  -7  -2   4   48.75    1.06
   7   2  -4   47.63    1.38
  -6   0   6  139.49    2.71
   6   0  -6  141.79    2.85
  -6   0   6  143.86    2.83
  -6   0   6  140.56    2.87
   5  -1   3   23.63    1.06
  -5   1  -3   25.93    0.80
  -5   1  -3   24.47    1.07
  -5   1  -3   24.20    0.62
  -5  -1  -3   24.56    0.84
   5   1   3   25.47    1.09
   5  -1   3   24.29    0.98
   5   1   3   24.46    0.75
   5   1   3   25.60    1.03
   5   1   3   24.30    0.81
  -5  -1  -3   23.72    0.73
  -5  -1  -3   25.98    1.14
  -5  -1  -3   25.28    1.05
  -4   0  -4   56.96    1.78
   4   0   4   60.53    1.42
   4   0   4   57.51    1.69
  -4   0  -4   57.69    1.36
   4   0   4   62.10    1.32
   4   0   4   59.64    1.79
  -4   0  -4   60.49    1.41
  -3  -2   6   62.57    1.44
   3  -2  -6   66.03    1.65
  -3  -2   6   65.34    1.53
  -3   2   6   62.16    1.80
  -3  -2   6   65.14    1.40
  -3   2   6   61.82    1.49
  -3   2   6   65.33    1.68
  -3   2   6   62.33    1.81
  -3   2   6   63.16    1.56
   1  -3  -5  258.75    4.75
  -1   3   5  253.87    4.62
  -1   3   5  256.40    4.73
  -1   3   5  265.99    5.03
   1   3  -5  259.90    4.50
  -1  -3   5  251.18    4.49
   1  -3  -5  256.10    5.08
   1  -3  -5  255.91    4.69
  -1  -3   5  257.89    4.33
   1   3  -5  260.68    4.42
   6   1   2  266.79    5.28
   6  -1   2  286.18    5.32
   6   1   2  283.07    4.85
  -6   1  -2  286.16    4.74
  -6  -1  -2  280.13    5.34
  -6   1  -2  274.14    5.34
  -6  -1  -2  286.23    5.01
  -6  -1  -2  282.20    5.49
   6  -1   2  270.54    5.00
   6  -1   2  277.13    5.26
  -6   1  -2  273.10    4.90
  -6  -1  -2  268.40    4.79
  -4   3   5   23.09    1.02
  -4  -3   5   21.38    0.63
  -4   3   5   21.25    1.07
  -4   3   5   20.66    0.81
  -4   3   5   23.19    0.94
   4  -3  -5   22.41    0.89
  -4  -3   5   23.65    0.70
  -4  -3   5   22.27    0.94
  -4   3   5   21.97    0.60
   1  -4   3  813.22   13.96
  -1   4  -3  853.78   14.06
   1  -4   3  848.79   13.98
  -1  -4  -3  869.99   14.14
   1  -4   3  867.87   14.18
   1   4   3  855.98   14.20
  -1  -4  -3  846.54   14.52
  -1  -4  -3  888.32   14.38
  -1   4  -3  868.57   14.04
   1  -4   3  853.74   14.23
   1   4   3  864.53   14.14
   1   4   3  878.93   14.52
  -8   1   3   39.23    1.17
  -8   1   3   38.51    1.24
  -8  -1   3   38.25    1.20
  -8   1   3   42.66    1.13
   8  -1  -3   40.47    1.21
   8  -1  -3   42.31    1.05
   8   1  -3   40.16    1.02
   8   1  -3   43.12    1.19
  -8  -1   3   40.23    0.99
   8   1  -3   39.72    1.18
  -8  -1   3   40.83    1.19
  -8   1   2   11.20    0.68
   8   1  -2   13.60    0.54
   8  -1  -2   11.29    0.59
  -8  -1   2   11.74    0.67
  -8  -1   2   11.18    0.44
  -8   1   2   11.22    0.59
   8   1  -2   11.59    0.61
  -8  -1   2   11.12    0.70
  -8   1   2   10.63    0.57
   8  -1  -2   11.82    0.55
   8   1  -2   11.28    0.63
  -4   4   3  203.91    3.87
   4  -4  -3  201.22    3.90
   4   4  -3  175.10    3.04
   4  -4  -3  200.29    3.52
  -4  -4   3  201.64    3.16
   4  -4  -3  202.46    3.73
   4   4  -3  200.46    3.12
  -4   4   3  183.37    4.14
   4  -4  -3  180.37    3.06
  -4  -4   3  202.85    3.67
  -4  -4   3  196.56    3.75
   2  -2  -6  130.56    3.05
  -2   2   6  133.46    3.00
  -2  -2   6  133.78    2.58
   2  -2  -6  132.62    2.81
  -2  -2   6  135.10    2.61
   2  -2  -6  137.57    3.11
  -2   2   6  138.38    2.83
  -2   2   6  139.68    3.01
   8   0  -4   20.04    0.73
   8   0  -4   18.22    0.72
   8   0  -4   19.15    0.73
  -8   0   4   19.57    0.72
  -8   0   4   18.12    0.72
  -8   0   4   17.86    0.78
  -4  -2   6  126.37    2.58
   4  -2  -6  127.38    2.79
  -4   2   6  129.33    2.62
  -4  -2   6  134.31    2.53
  -4   2   6  131.93    2.80
  -4   2   6  134.93    3.07
  -4   2   6  129.01    3.04
  -4   2   6  128.83    2.58
  -4  -2   6  130.82    2.31
  -7   0  -1    0.09    0.33
   7   0   1    1.01    0.33
   7   0   1    0.23    0.50
  -7   0  -1   -0.06    0.19
   7   0   1    0.24    0.22
  -7   0  -1   -0.03    0.27
  -7   0  -1   -0.02    0.33
   0  -1  -6   18.46    0.79
   0   1   6   17.12    0.88
   0  -1   6   16.97    0.65
   0  -1   6   17.46    0.78
   0   1   6   17.45    0.88
   0  -1   6   18.13    0.69
   0   1  -6   17.56    0.68
   0  -1   6   16.09    0.89
   0   1   6   17.10    0.77
  -8   0   1    0.12    0.34
   8   0  -1    0.52    0.34
  -8   0   1   -0.13    0.37
  -8   0   1    0.20    0.22
   8   0  -1    0.20    0.22
  -6  -3   0   87.09    2.11
   6  -3   0   91.84    2.11
  -6   3   0   87.14    1.93
   6  -3   0   85.92    2.09
   6  -3   0   96.14    2.02
  -6  -3   0   83.30    2.19
  -6   3   0   88.15    1.99
   6   3   0   82.59    2.09
   6   3   0   90.73    2.08
   6   3   0   86.17    1.56
   2   3   4   26.79    1.09
   2  -3   4   26.19    0.89
  -2   3  -4   30.60    0.97
  -2  -3  -4   27.28    1.13
   2   3   4   27.97    0.90
  -2  -3  -4   28.94    1.14
   2  -3   4   27.25    0.90
  -2  -3  -4   27.61    1.07
   2   3   4   28.03    1.04
  -2  -3  -4   26.63    0.86
  -6   1   6 1656.36   26.82
  -6   1   6 1653.01   26.96
  -6  -1   6 1663.23   26.95
   6  -1  -6 1648.45   27.11
   6   1  -6 1673.47   26.92
  -6  -1   6 1635.13   26.76
  -6   1   6 1721.31   27.12
  -6  -1   6 1702.04   27.12
   4   1   4 1123.77   18.75
  -4  -1  -4 1177.11   18.23
  -4  -1  -4 1127.94   18.35
   4   1   4 1133.42   18.75
  -4   1  -4 1068.43   18.22
  -4   1  -4 1109.60   17.94
   4   1   4 1105.16   18.24
  -4  -1  -4 1119.44   18.77
   4  -1   4 1119.41   18.60
  -4  -1  -4 1106.00   18.86
  -4   1  -4 1106.20   18.61
   4   1   4 1126.00   18.19
  -7  -2   0  704.36   11.34
  -7  -2   0  717.81   12.01
  -7   2   0  686.37   11.97
  -7   2   0  704.77   11.72
   7  -2   0  702.16   11.98
  -7  -2   0  717.81   11.89
   7  -2   0  714.68   11.86
   7   2   0  720.25   11.96
   7   2   0  710.99   11.42
  -7  -2   0  724.88   12.17
  -7   2   0  698.68   11.87
  -6  -3   4 1032.47   16.73
  -6  -3   4 1048.31   16.84
  -6   3   4 1077.65   17.42
   6  -3  -4 1052.73   17.43
  -6   3   4 1046.24   17.31
  -6   3   4 1028.53   17.61
   6  -3  -4 1089.62   17.31
  -6   3   4 1009.71   18.01
  -6  -3   4 1049.56   16.82
  -6  -3   4 1045.94   17.45
  -8  -1   4   43.16    1.09
   8  -1  -4   43.72    1.07
   8   1  -4   44.73    1.27
  -8   1   4   43.77    1.29
  -8  -1   4   41.46    1.18
  -8   1   4   39.68    1.24
   8  -1  -4   42.44    1.24
   8   1  -4   43.84    1.09
   8  -1  -4   44.03    1.27
  -8   1   4   38.85    1.07
   8   1  -4   43.84    1.17
  -8  -1   4   45.33    1.26
  -2   4   4   93.65    2.40
   2  -4  -4  100.02    2.03
   2  -4  -4   99.01    2.44
   2  -4  -4   93.92    2.19
  -2   4   4   99.57    2.57
   2  -4  -4   87.29    2.53
  -2   4   4   98.14    1.91
  -2  -4   4   99.28    2.08
  -2  -4   4   93.66    1.94
  -2   4   4   97.56    2.20
   2   4  -4   93.56    1.89
  -7   1  -1  632.70   10.96
  -7   1  -1  634.24   10.98
   7  -1   1  630.50   10.69
   7  -1   1  637.33   10.90
  -7   1  -1  634.91   10.55
   7  -1   1  633.81   10.95
   7   1   1  628.14   10.48
  -7  -1  -1  627.25   10.97
  -7  -1  -1  631.36   10.40
  -7  -1  -1  637.84   11.12
  -7  -1  -1  639.51   10.68
  -3   4  -2    6.94    0.46
   3  -4   2    8.05    0.41
  -3   4  -2    8.20    0.37
   3  -4   2    7.72    0.53
   3   4   2    7.35    0.57
  -3   4  -2    8.05    0.55
  -3  -4  -2    7.28    0.37
  -3   4  -2    7.55    0.51
   3   4   2    8.16    0.42
   3   4   2    7.43    0.54
   3   4   2    7.62    0.59
  -3  -4  -2    8.45    0.67
   3  -4   2    8.32    0.47
  -3  -4  -2    7.20    0.61
   1  -2  -6   92.93    2.30
  -1  -2   6   90.73    1.97
  -1   2   6   90.36    2.25
  -1   2   6   90.97    2.18
   1  -2  -6   95.85    2.14
  -1  -2   6   93.48    1.97
   1  -2  -6   91.49    2.32
   1   2  -6   90.76    1.98
   8  -1  -1    4.16    0.41
  -8  -1   1    4.31    0.27
   8  -1  -1    3.86    0.46
  -8   1   1    4.41    0.50
  -8  -1   1    4.98    0.55
   8   1  -1    4.25    0.43
  -8   1   1    4.43    0.41
   8   1  -1    4.88    0.49
   8  -1  -1    3.61    0.44
  -8  -1   1    3.46    0.44
  -8   1   1    5.00    0.48
   8   1  -1    4.31    0.34
   0  -3  -5  433.40    7.89
   0  -3  -5  435.04    7.67
   0  -3   5  424.04    7.35
   0   3  -5  426.06    7.31
   0   3  -5  425.30    7.31
   0  -3   5  422.56    7.24
   0  -3  -5  436.49    7.78
   0  -3  -5  434.51    7.47
   0   3   5  424.45    7.52
   0   3   5  427.00    7.76
   0   3   5  434.18    7.49
   5  -4  -2   97.14    2.30
  -5  -4   2   95.73    2.28
  -5   4   2  100.87    2.30
  -5   4   2   91.29    2.18
   5  -4  -2   96.15    2.13
   5  -4  -2   91.37    1.76
   5   4  -2   99.34    1.93
   5   4  -2   98.01    2.33
  -5  -4   2   95.55    2.25
   4   4   1  458.24    8.03
   4   4   1  441.20    8.07
  -4   4  -1  461.50    8.16
  -4  -4  -1  447.15    8.06
  -4  -4  -1  454.22    7.45
   4  -4   1  456.49    7.75
   4   4   1  461.96    7.50
  -4  -4  -1  424.48    8.06
   4  -4   1  450.84    7.83
  -4   4  -1  448.04    7.88
   4   4   1  446.27    7.97
  -4   4  -1  461.59    7.65
   4  -4   1  450.76    7.97
  -5   2   6  869.64   14.99
  -5   2   6  909.32   15.34
  -5   2   6  897.93   15.42
  -5  -2   6  898.09   14.42
  -5  -2   6  896.12   14.61
   5  -2  -6  914.81   15.00
  -5   2   6  878.50   14.61
  -5  -2   6  873.70   14.70
  -5   2   6  914.40   14.81
  -5  -2   6  904.51   15.03
  -1  -4   4  579.52    9.34
   1   4  -4  571.96    9.57
  -1  -4   4  593.04    9.76
  -1  -4   4  571.27    9.65
  -1  -4   4  564.27    9.66
   1   4  -4  579.10    9.43
   1  -4  -4  558.28   10.19
   1  -4  -4  594.20    9.82
  -1   4   4  572.17    9.66
  -1   4   4  554.18   10.19
   1  -4  -4  578.96    9.86
  -1   4   4  597.20    9.87
  -5   4   1   96.74    2.54
   5  -4  -1   90.79    2.21
  -5  -4   1   81.79    2.18
   5  -4  -1   96.55    2.12
  -5   4   1   84.06    2.08
  -5   4   1   96.94    2.17
   5   4  -1   91.06    2.01
   5   4  -1   92.06    2.21
  -5  -4   1   89.41    2.20
   5  -4  -1   95.15    1.90
  -5   4   1   98.16    2.16
  -3   4   4  265.52    5.32
   3  -4  -4  257.22    5.12
   3  -4  -4  262.30    4.90
  -3   4   4  256.66    4.38
   3   4  -4  253.98    4.43
  -3  -4   4  261.11    4.75
  -3  -4   4  249.12    5.00
  -3  -4   4  259.18    4.47
  -3   4   4  265.96    4.90
   3  -4  -4  255.20    5.35
  -5  -3   5  190.80    3.32
  -5  -3   5  200.93    3.95
  -5  -3   5  184.65    3.39
  -5   3   5  192.14    3.83
  -5   3   5  188.39    4.04
  -5   3   5  188.02    3.67
   5  -3  -5  190.51    3.84
  -5   3   5  183.43    4.20
   0   5   0   -0.01    0.22
   0  -5   0    0.02    0.32
   0   5   0   -0.05    0.30
   0  -5   0    0.06    0.24
   0   5   0    0.05    0.24
   0  -5   0    0.15    0.25
   0  -5   0   -0.26    0.44
   1   5   0  317.48    5.49
   1   5   0  326.37    5.77
  -1  -5   0  334.43    6.20
   1  -5   0  317.10    5.84
   1  -5   0  312.35    6.10
  -1   5   0  320.24    5.78
  -1  -5   0  316.14    5.87
   1   5   0  323.27    5.47
   1  -5   0  308.67    5.60
  -1   5   0  313.63    5.58
  -1   5   0  327.61    5.56
   1  -5   0  296.47    5.69
  -1  -5   0  314.84    5.72
   1   5   0  315.76    5.83
  -1  -5   0  309.35    5.54
   2   2   5  415.34    7.84
  -2   2  -5  431.85    7.35
   2   2   5  428.69    7.55
   2   2   5  431.19    7.31
   2   2   5  430.60    7.71
   2  -2   5  434.52    7.37
  -2   2  -5  413.54    7.49
   2   2   5  429.08    7.40
   2  -2   5  418.90    7.48
  -2  -2  -5  436.78    7.68
  -2  -2  -5  434.96    7.84
  -2  -2  -5  428.03    7.61
   3   0   5   -0.05    0.20
  -3   0  -5    0.21    0.36
   3   0   5    0.23    0.31
  -3   0  -5    0.02    0.21
   3   0   5    0.03    0.40
  -3   0  -5   -0.02    0.22
  -3   0  -5   -0.17    0.37
   1   0   6  241.14    4.54
   1   0   6  241.50    4.48
   1   0   6  239.55    4.78
   1   0   6  243.44    4.46
   1   0   6  244.66    4.94
  -1   0  -6  255.86    4.41
   0  -5   1  855.48   14.43
   0  -5  -1  890.05   14.80
   0  -5  -1  870.56   14.44
   0  -5  -1  863.50   15.03
   0  -5   1  845.84   14.53
   0   5   1  879.15   14.48
   0  -5   1  876.24   14.87
   0  -5   1  871.25   14.60
   0   5   1  865.53   14.39
   0  -5  -1  880.39   14.46
   0   5   1  888.69   14.34
   0   5  -1  847.74   14.52
   0   5  -1  878.56   14.26
   0   5  -1  889.70   14.32
   0   5   1  874.47   14.71
   1  -5  -1   48.68    1.24
  -1   5   1   49.88    1.46
   1   5  -1   50.06    1.14
  -1  -5   1   48.42    1.61
  -1  -5   1   47.43    1.44
  -1   5   1   48.52    1.24
   1  -5  -1   47.07    1.33
  -1  -5   1   47.91    1.23
   1   5  -1   48.72    1.40
   1  -5  -1   46.45    1.64
  -1  -5   1   46.27    1.35
   1   5  -1   49.79    1.16
   1  -5  -1   45.21    1.46
  -1   5   1   46.80    1.29
  -2   4  -3   63.51    1.51
   2  -4   3   62.71    1.58
  -2  -4  -3   64.46    1.76
   2  -4   3   62.82    1.47
   2   4   3   60.39    1.62
   2   4   3   63.20    1.48
  -2   4  -3   62.91    1.48
   2   4   3   64.68    1.77
   2  -4   3   63.90    1.33
  -2  -4  -3   60.70    1.46
  -2   4  -3   59.13    1.52
  -7   2   5    4.53    0.45
  -7   2   5    3.86    0.51
  -7   2   5    4.66    0.23
   7   2  -5    4.88    0.29
  -7  -2   5    4.92    0.32
   7   2  -5    4.39    0.30
  -7  -2   5    4.94    0.33
  -7  -2   5    4.71    0.45
   5   3   2  598.63   10.00
  -5   3  -2  584.05    9.97
  -5   3  -2  593.19    9.78
  -5  -3  -2  575.87   10.02
  -5   3  -2  560.69    9.34
   5   3   2  563.87    9.45
   5   3   2  586.96   10.15
   5   3   2  585.26    9.55
   5  -3   2  602.76    9.98
   5   3   2  556.80    9.99
   5  -3   2  600.26   10.07
   5  -3   2  586.83    9.94
   7   0  -6 1151.64   18.43
  -7   0   6 1076.98   18.27
  -7   0   6 1126.73   18.40
   7   0  -6 1118.31   18.21
  -7   0   6 1125.36   18.32
  -5   4   3   38.79    1.33
   5  -4  -3   37.12    1.26
  -5  -4   3   38.27    0.77
  -5  -4   3   36.83    1.27
  -5  -4   3   37.26    0.75
   5   4  -3   37.64    1.29
  -5  -4   3   37.96    1.25
   5  -4  -3   39.11    1.14
  -8   0   5    0.21    0.31
  -8   0   5    0.07    0.27
   8   0  -5    0.02    0.20
  -8   0   5    0.27    0.22
   8   0  -5    0.32    0.21
  -5   2  -3   63.84    1.78
  -5   2  -3   64.96    1.56
   5  -2   3   64.75    1.86
   5  -2   3   67.07    1.77
   5   2   3   64.67    1.49
  -5  -2  -3   67.78    2.01
   5   2   3   67.19    1.89
  -5  -2  -3   65.58    1.69
   5   2   3   62.11    1.64
  -5  -2  -3   66.45    1.91
   5   2   3   69.05    1.44
  -7  -3   2   16.85    0.83
  -7   3   2   16.04    0.79
  -7  -3   2   15.09    0.67
  -7  -3   2   14.66    0.77
   7   3  -2   16.89    0.67
   7  -3  -2   16.43    0.57
  -7   3   2   15.15    0.77
   7  -3  -2   16.67    0.76
  -7   3   2   15.46    0.75
   0  -4  -4  166.62    3.29
   0  -4  -4  159.22    3.47
   0   4   4  153.11    3.44
   0   4   4  151.98    3.08
   0  -4   4  159.69    2.85
   0   4  -4  156.14    2.92
   0   4  -4  158.33    2.98
   0  -4   4  158.74    2.95
   0  -4   4  161.28    3.09
   0  -4   4  155.43    3.04
   0   4   4  155.60    3.15
   0  -4  -4  163.52    3.17
   4  -3   3  641.08   11.07
   4  -3   3  628.45   10.83
  -4   3  -3  669.04   10.84
   4   3   3  630.52   10.59
  -4   3  -3  637.48   10.70
   4   3   3  627.00   10.90
   4   3   3  610.22   10.94
  -4  -3  -3  625.44   10.95
   4  -3   3  631.50   10.82
  -4   3  -3  619.71   10.88
   4   3   3  659.80   10.50
  -3   0   7   -0.02    0.24
  -3   0   7    0.17    0.21
  -3   0   7    0.03    0.25
  -3   0   7   -0.09    0.27
  -6  -2  -2  466.94    8.43
   6  -2   2  502.14    8.68
   6  -2   2  462.92    8.55
   6   2   2  471.10    8.63
  -6  -2  -2  507.09    8.08
  -6   2  -2  490.25    8.28
  -6   2  -2  458.63    8.59
  -6  -2  -2  484.94    8.72
  -6  -2  -2  478.07    8.85
   6   2   2  492.63    8.07
  -4   0   7   -0.02    0.20
  -4   0   7    0.05    0.28
  -4   0   7    0.20    0.28
  -4  -4   4   74.88    1.93
  -4  -4   4   72.04    1.76
   4   4  -4   74.10    1.41
  -4  -4   4   69.53    1.42
   4  -4  -4   72.20    2.04
   4  -4  -4   74.18    1.86
  -4   4   4   73.42    2.16
   4  -4  -4   74.63    2.25
   5  -4   0   10.64    0.56
   5   4   0   10.81    0.66
  -5  -4   0   10.22    0.67
   5  -4   0   10.03    0.64
  -5   4   0   11.39    0.65
   5  -4   0   10.72    0.57
   5   4   0    9.37    0.25
   5   4   0   10.33    0.30
   5   4   0    9.69    0.57
  -5   4   0   10.62    0.75
  -5   4   0   10.44    0.53
  -5   4   0    9.23    0.58
   8   0   0    0.15    0.42
   8   0   0    0.21    0.25
  -8   0   0    0.09    0.32
  -8   0   0    0.16    0.35
  -8   0   0    0.36    0.22
   8   2  -3  276.43    5.23
  -8  -2   3  288.49    5.32
  -8   2   3  276.82    5.29
   8  -2  -3  273.72    5.28
   8  -2  -3  282.44    4.79
  -8   2   3  284.49    4.91
  -8  -2   3  284.41    4.69
  -8   2   3  274.86    5.18
   8   2  -3  281.34    5.08
  -8  -2   3  273.64    5.09
  -7  -3   3  350.00    5.93
   7  -3  -3  370.72    6.26
  -7   3   3  362.37    6.44
  -7  -3   3  359.20    6.34
  -7   3   3  352.39    6.23
   7   3  -3  353.60    5.89
  -7   3   3  347.43    6.25
   8   2  -2   32.06    1.13
   8  -2  -2   32.61    1.12
  -8  -2   2   32.29    0.70
  -8   2   2   32.20    1.15
  -8   2   2   31.54    1.06
   8   2  -2   31.68    1.04
  -8   2   2   30.52    0.96
  -8  -2   2   30.31    1.16
  -8  -2   2   31.73    1.07
   8  -2  -2   31.16    1.12
   1   5   1    3.66    0.35
   1   5   1    3.49    0.32
   1  -5   1    3.84    0.43
  -1  -5  -1    4.37    0.61
   1  -5   1    3.35    0.40
   1   5   1    4.37    0.45
   1  -5   1    3.55    0.37
  -1   5  -1    4.22    0.37
  -1  -5  -1    3.24    0.37
   1  -5   1    3.56    0.51
  -1  -5  -1    3.46    0.33
  -1   5  -1    3.43    0.38
  -1   5  -1    3.29    0.36
  -1  -5  -1    3.76    0.51
   1  -5   1    3.78    0.29
   2  -5  -1   27.92    1.07
   2  -5  -1   27.46    1.26
   2  -5  -1   28.66    1.01
  -2  -5   1   26.94    0.82
   2  -5  -1   27.42    0.84
   2   5  -1   27.13    0.74
   2   5  -1   27.72    1.02
  -2   5   1   26.55    1.02
  -2   5   1   28.60    1.21
  -2  -5   1   27.47    1.04
  -2   5   1   26.39    0.89
   2   5  -1   27.85    1.02
  -2   5   1   28.57    0.97
   2  -5  -1   26.53    0.83
  -2  -5   1   29.03    1.03
   2   5  -1   27.93    0.75
  -2  -5   1   25.89    1.14
   3   1   5   95.88    2.48
  -3   1  -5   99.07    2.38
  -3   1  -5   94.96    2.11
   3  -1   5   98.95    1.80
   3  -1   5   97.07    2.12
   3   1   5   96.34    2.13
   3  -1   5   98.11    2.52
   3   1   5   94.08    2.05
   3   1   5   95.66    2.45
   3  -1   5   98.76    2.36
   3   1   5  101.10    2.13
  -3  -1  -5   99.57    2.20
  -1   1  -6   14.81    0.64
   1  -1   6   12.91    0.58
   1   1   6   13.28    0.83
  -1  -1  -6   13.82    0.72
   1  -1   6   12.12    0.80
   1  -1   6   12.56    0.52
   1   1   6   11.69    0.75
   1   1   6   13.74    0.67
   1  -1   6   11.92    0.70
  -1  -1  -6   13.72    0.69
  -1   1  -6   11.65    0.37
   2   5   0   33.63    0.88
   2   5   0   36.05    0.91
   2  -5   0   32.74    1.37
  -2  -5   0   33.65    1.34
  -2  -5   0   33.72    1.21
  -2   5   0   35.05    1.04
   2   5   0   36.18    1.19
   2  -5   0   34.16    1.16
   2  -5   0   35.28    0.96
  -2   5   0   34.48    1.06
  -2   5   0   33.93    1.30
  -2   5   0   34.49    1.11
  -2  -5   0   33.67    1.13
  -2  -5   0   32.40    0.92
   2  -5   0   34.89    1.03
   2  -5   0   34.74    1.13
   0  -2   6    2.45    0.34
   0  -2   6    2.54    0.30
   0   2   6    2.77    0.39
   0  -2  -6    2.50    0.43
   0  -2  -6    2.81    0.45
   0   2   6    2.06    0.46
   0   2   6    2.65    0.40
   0  -2   6    2.82    0.31
   0  -2  -6    3.04    0.47
  -6  -3  -1   57.57    1.63
   6  -3   1   57.60    1.60
   6  -3   1   55.34    1.57
  -6   3  -1   56.20    1.61
  -6   3  -1   56.86    1.47
   6   3   1   60.79    1.16
   6  -3   1   58.90    1.61
   6   3   1   56.87    1.20
  -6  -3  -1   56.60    1.81
   6   3   1   58.32    1.66
  -6  -3  -1   57.73    1.71
   6   3   1   57.90    1.66
  -2   0   7   -0.10    0.19
  -2   0   7   -0.07    0.25
  -2   0   7    0.09    0.36
  -2   0   7    0.05    0.22
  -2   0   7   -0.05    0.25
   7   1  -6  427.44    7.00
  -7  -1   6  403.72    7.32
  -7  -1   6  413.44    7.07
  -7   1   6  421.01    7.39
   7  -1  -6  422.90    7.36
  -7  -1   6  412.82    7.17
  -7   1   6  399.87    7.02
   7   1  -6  417.71    7.16
  -7   1   6  402.00    7.23
   7  -1  -6  425.53    7.17
  -8  -1   5   77.17    1.81
  -8   1   5   69.09    1.81
  -8   1   5   68.92    1.56
   8  -1  -5   73.27    1.82
   8   1  -5   71.48    1.61
  -8  -1   5   75.15    1.66
  -8   1   5   69.76    1.77
   8   1  -5   74.01    1.63
  -8  -1   5   71.66    1.66
   8  -1  -5   68.83    1.69
   8   1  -5   71.73    1.77
   7   3  -1   24.95    0.91
   7  -3  -1   25.64    0.97
  -7   3   1   23.80    0.92
  -7  -3   1   20.61    1.02
   7   3  -1   25.22    1.01
  -7  -3   1   24.53    0.95
   7  -3  -1   25.06    0.82
  -7   3   1   24.94    0.92
  -6   2   6  614.75    9.98
  -6   2   6  610.70   10.35
  -6  -2   6  611.57    9.97
  -6   2   6  613.13   10.52
  -6   2   6  602.24   10.05
  -6   2   6  606.96   10.90
  -6  -2   6  621.95   10.57
  -6  -2   6  616.65   10.09
  -6  -2   6  599.66   10.18
  -6   2   6  584.64   10.96
   5   0  -7    0.15    0.23
  -5   0   7   -0.09    0.21
  -5   0   7    0.09    0.29
   4   2   4    0.15    0.24
  -4  -2  -4    0.37    0.31
   4   2   4    0.26    0.52
   4  -2   4    0.47    0.41
   4  -2   4    1.04    0.27
  -4   2  -4    0.08    0.22
   4   2   4    0.11    0.31
  -4   2  -4   -0.08    0.31
   4  -2   4    0.07    0.29
   4   2   4    0.10    0.33
   4   2   4    0.07    0.18
  -3  -1   7   76.17    1.84
  -3   1   7   75.89    1.98
   3  -1  -7   80.62    1.95
  -3   1   7   77.45    1.92
  -3   1   7   76.79    1.94
  -3  -1   7   76.98    1.76
  -3  -1   7   78.32    1.74
  -3   1   7   80.38    2.11
   1  -5  -2  614.88   10.50
  -1   5   2  602.49   10.75
  -1   5   2  609.91   10.47
   1   5  -2  607.53   10.20
  -1  -5   2  615.25   10.54
  -1   5   2  637.12   10.38
   1  -5  -2  609.02   11.08
  -1   5   2  612.34   10.40
  -1  -5   2  611.37   10.64
   1   5  -2  607.58   10.48
  -1  -5   2  612.71   10.36
   1  -5  -2  629.75   10.81
   1  -5  -2  607.86   10.34
   1   5  -2  633.81   10.16
  -4   1   7    7.93    0.62
  -4   1   7    7.26    0.61
  -4   1   7    7.50    0.55
  -4  -1   7    7.63    0.37
  -4   1   7    7.35    0.45
  -4  -1   7    7.36    0.50
  -4  -1   7    7.64    0.44
  -4   1   7    7.65    0.55
  -1  -3  -5  575.17    9.93
  -1  -3  -5  562.99    9.43
   1   3   5  544.81    9.59
  -1   3  -5  541.57    9.37
  -1  -3  -5  565.06    9.79
   1  -3   5  560.45    9.33
   1   3   5  557.38    9.74
  -1  -3  -5  572.16    9.81
   1  -3   5  550.62    9.39
  -1   3  -5  548.04    9.32
   1  -3   5  539.77    8.96
   1   3   5  560.70    9.46
   8   1   0   75.52    1.97
   8  -1   0   81.28    2.01
   8   1   0   76.86    2.02
  -8   1   0   75.12    2.04
  -8  -1   0   81.54    1.61
   8  -1   0   82.42    2.08
  -8   1   0   77.72    2.03
  -8   1   0   80.31    1.76
  -8  -1   0   79.24    2.14
  -8  -1   0   79.61    2.06
   8  -1   0   81.00    1.91
   8   1   0   79.67    1.73
  -8  -1   0   76.98    1.87
  -6   3   5   43.14    1.27
   6  -3  -5   43.66    1.24
   6   3  -5   41.73    0.79
  -6  -3   5   42.74    1.02
  -6  -3   5   44.54    0.96
  -6  -3   5   42.67    1.39
   6  -3  -5   44.96    1.38
  -6   3   5   44.95    1.39
  -6   3   5   42.18    1.65
   8  -2  -4    1.45    0.19
   8   2  -4    2.09    0.27
  -8   2   4    2.06    0.39
  -8  -2   4    1.52    0.22
  -8   2   4    1.58    0.21
  -8  -2   4    1.66    0.34
   8  -2  -4    1.46    0.33
   8   2  -4    1.78    0.40
  -8  -2   4    1.23    0.29
   8   2  -4    1.51    0.19
  -8   2   4    1.34    0.37
   0   5   2  238.44    4.31
   0  -5   2  233.49    4.38
   0  -5   2  233.45    4.10
   0   5  -2  236.59    4.20
   0  -5   2  233.99    4.58
   0   5   2  233.89    4.36
   0  -5   2  240.93    4.47
   0   5  -2  237.26    4.39
   0  -5  -2  237.33    4.98
   0   5  -2  229.03    4.23
   0  -5   2  230.91    4.66
   0   5   2  237.88    4.40
   0  -5  -2  234.91    4.40
   0  -5  -2  216.65    4.69
   2   5  -2    3.05    0.23
  -2   5   2    2.40    0.39
   2  -5  -2    2.99    0.30
   2  -5  -2    2.82    0.59
  -2   5   2    2.81    0.36
  -2  -5   2    2.88    0.48
   2  -5  -2    2.89    0.39
  -2  -5   2    3.19    0.40
  -2  -5   2    2.39    0.29
  -2  -5   2    2.53    0.40
  -2   5   2    2.37    0.41
   2   5  -2    2.65    0.25
   2  -5  -2    3.12    0.48
   7   2   1   12.53    0.75
  -7  -2  -1   14.86    0.76
   7  -2   1   14.68    0.79
  -7   2  -1   15.43    0.78
   7   2   1   15.21    0.51
  -7   2  -1   14.29    0.64
   7  -2   1   15.11    0.80
   7   2   1   16.21    0.82
  -7  -2  -1   14.50    0.89
   7  -2   1   13.92    0.70
  -7  -2  -1   14.39    0.48
  -7  -2  -1   13.93    0.80
   3  -3   4   27.92    0.97
   3   3   4   25.94    1.02
   3   3   4   24.97    0.79
   3  -3   4   26.87    0.94
  -3  -3  -4   27.58    1.17
   3   3   4   27.37    1.11
   3  -3   4   29.79    1.17
   3   3   4   26.78    0.89
  -3  -3  -4   30.35    1.14
  -3   3  -4   27.57    0.98
   6   0   3    0.03    0.20
  -6   0  -3    0.23    0.22
  -6   0  -3    0.03    0.38
  -6   0  -3    0.03    0.38
  -6   0  -3    0.02    0.22
   6   0   3    0.12    0.31
   8   2  -1   17.99    0.84
  -8   2   1   16.46    0.84
  -8  -2   1   17.93    0.94
   8  -2  -1   17.15    0.76
  -8  -2   1   17.27    0.82
  -8   2   1   16.62    0.74
   8   2  -1   17.11    0.79
   8  -2  -1   16.03    0.78
  -8  -2   1   15.80    0.78
   8  -2  -1   16.87    0.82
  -8  -2   1   17.07    0.45
  -8   2   1   17.56    0.75
  -2   1   7   31.40    1.08
  -2  -1   7   30.08    0.97
  -2   1   7   30.23    1.07
  -2  -1   7   30.95    0.81
  -2   1   7   30.66    1.14
  -2  -1   7   31.14    1.06
  -2   1   7   28.90    1.12
  -2  -1   7   30.24    1.09
  -2  -1   7   28.32    1.00
  -7  -3   4  219.14    4.33
  -7  -3   4  205.52    3.59
  -7   3   4  225.56    4.52
   7  -3  -4  223.12    4.20
  -7  -3   4  224.11    3.69
  -7   3   4  227.75    4.31
  -7  -3   4  224.47    3.86
   7   3  -4  222.04    3.81
  -7   3   4  221.26    4.26
  -7   3   4  213.26    4.82
  -5   1   7   91.36    2.21
  -5   1   7   95.11    2.04
  -5  -1   7   92.82    1.88
  -5  -1   7   96.48    2.02
  -5   1   7   92.97    2.50
  -5   1   7   92.70    2.43
  -5  -1   7   92.46    2.12
  -2   5  -1   80.84    2.11
   2  -5   1   80.07    1.87
   2   5   1   79.85    1.92
  -2   5  -1   78.47    1.81
  -2  -5  -1   77.96    2.07
   2  -5   1   78.89    2.15
  -2   5  -1   80.61    1.80
  -2  -5  -1   76.54    1.69
   2  -5   1   78.26    1.88
   2  -5   1   75.99    1.89
   2   5   1   78.04    1.70
  -2  -5  -1   76.60    2.22
   2  -5   1   80.92    1.73
  -2   5  -1   80.05    1.84
  -2  -5  -1   76.07    1.91
   9   0  -3   -0.14    0.27
   9   0  -3    0.19    0.26
  -9   0   3    0.07    0.34
  -9   0   3    0.30    0.37
  -9   0   3   -0.16    0.25
   9   0  -3    0.04    0.25
   1   4   4  114.60    2.41
  -1   4  -4  112.52    2.29
  -1  -4  -4  112.01    2.91
   1  -4   4  112.92    2.40
   1  -4   4  117.25    2.16
   1  -4   4  109.24    2.23
  -1   4  -4  114.49    2.30
  -1  -4  -4  112.12    2.36
   1   4   4  109.55    2.43
   1   4   4  113.36    2.70
  -1  -4  -4  114.18    2.65
   3  -3  -6   40.08    1.26
  -3   3   6   36.98    1.05
  -3   3   6   38.27    1.45
  -3   3   6   38.46    1.40
  -3   3   6   37.69    1.12
  -3  -3   6   36.68    0.82
   3  -3  -6   41.07    1.57
   3   3  -6   39.36    1.04
  -3  -3   6   39.10    1.02
  -3   5   1    1.66    0.34
   3  -5  -1    1.60    0.24
  -3   5   1    1.26    0.35
   3   5  -1    1.42    0.35
  -3  -5   1    1.65    0.36
  -3   5   1    1.08    0.32
   3   5  -1    0.95    0.18
  -3   5   1    1.18    0.42
   3  -5  -1    1.68    0.27
   3  -5  -1    0.88    0.47
   3   5  -1    1.51    0.40
  -3  -5   1    1.04    0.38
   3   5  -1    1.17    0.19
   3  -5  -1    1.46    0.35
  -3  -5   1    1.76    0.23
   3  -5  -1    0.90    0.35
  -5   4   4   14.51    0.94
  -5   4   4   13.15    0.70
  -5  -4   4   13.11    0.75
  -5  -4   4   14.56    0.44
  -5   4   4   16.79    0.90
   5  -4  -4   14.16    0.75
  -5  -4   4   14.33    0.76
   5  -4  -4   15.51    0.69
  -5  -4   4   13.60    0.45
   7   0   2  502.65    8.63
  -7   0  -2  514.03    8.51
  -7   0  -2  505.50    8.54
  -7   0  -2  509.05    9.06
   7   0   2  512.20    9.05
   7   0   2  505.06    9.06
  -7   0  -2  489.22    9.17
   4  -4   2  324.22    5.61
  -4   4  -2  318.82    5.77
   4  -4   2  304.87    5.66
  -4   4  -2  310.68    5.62
   4   4   2  312.36    5.86
  -4  -4  -2  318.77    5.91
   4   4   2  312.36    5.80
   4   4   2  288.85    5.17
   4   4   2  297.87    5.70
   4   4   2  310.41    5.29
   5   0   4  569.07    9.33
  -5   0  -4  562.19    9.23
  -5   0  -4  523.96    9.93
  -5   0  -4  545.38    9.28
   5   0   4  538.60    9.81
   5   0   4  533.99    9.76
  -1   0   7    0.04    0.20
  -1   0   7   -0.09    0.24
  -1   0   7   -0.03    0.28
  -1   0   7   -0.12    0.39
  -1   0   7    0.20    0.27
  -2  -3   6   12.76    0.46
   2  -3  -6   11.65    0.66
  -2   3   6   13.46    0.82
  -2   3   6   11.27    0.75
  -2  -3   6   13.41    0.56
   2  -3  -6   12.56    0.66
  -2   3   6   13.88    0.67
   2  -3  -6   13.07    0.87
  -2   3   6   11.47    0.69
   2   3  -6   14.69    0.60
  -6   4   2  979.47   17.02
   6  -4  -2  948.77   16.31
   6  -4  -2  974.30   16.52
  -6   4   2  988.56   16.49
  -6  -4   2 1013.54   16.57
  -6  -4   2  969.34   16.47
   6   4  -2 1028.26   16.09
   6   4  -2 1000.89   16.52
   6  -4  -2  955.34   15.84
  -6   4   2  996.35   16.40
  -9   0   2 3318.27   52.46
  -9   0   2 3249.46   52.84
   9   0  -2 3280.65   52.86
   9   0  -2 3251.65   52.61
  -9   0   2 3261.35   52.82
   9   0  -2 3323.41   52.68
   4  -3  -6    2.79    0.39
  -4  -3   6    3.20    0.34
  -4  -3   6    2.28    0.12
  -4   3   6    3.40    0.47
  -4   3   6    3.79    0.51
  -4  -3   6    1.94    0.12
  -4   3   6    2.90    0.30
  -4   3   6    3.19    0.51
  -4  -3   6    3.09    0.26
  -4   3   6    2.47    0.35
   3  -5   0    2.32    0.56
  -3   5   0    2.70    0.36
  -3   5   0    2.87    0.48
   3  -5   0    2.90    0.41
  -3  -5   0    3.20    0.47
   3  -5   0    2.23    0.37
   3  -5   0    2.75    0.32
  -3   5   0    2.40    0.37
  -3  -5   0    2.45    0.24
  -3   5   0    2.53    0.37
   3  -5   0    2.64    0.31
  -3  -5   0    2.59    0.40
   3   5   0    4.01    0.46
   3   5   0    2.22    0.25
   6  -1   3  187.31    3.67
  -6   1  -3  190.27    4.08
  -6  -1  -3  194.80    3.52
  -6  -1  -3  189.71    4.03
   6   1   3  190.29    3.52
   6  -1   3  184.78    3.92
  -6   1  -3  191.54    3.34
  -6   1  -3  189.85    3.55
   6   1   3  181.12    3.98
   6  -1   3  190.79    4.02
  -6  -1  -3  196.28    4.21
  -6  -1  -3  187.52    3.64
   6   1   3  191.53    4.04
  -1   5  -2    1.38    0.28
   1  -5   2    1.05    0.31
  -1  -5  -2    1.00    0.26
   1  -5   2    1.34    0.43
  -1  -5  -2    1.08    0.50
   1  -5   2    0.97    0.29
   1   5   2    1.05    0.33
  -1   5  -2    0.89    0.28
  -1  -5  -2    0.34    0.40
  -1  -5  -2    0.93    0.37
   1  -5   2    0.97    0.30
   1  -5   2    1.22    0.22
   1   5   2    1.01    0.31
   1   5   2    0.47    0.35
  -1   5  -2    0.94    0.26
   6   0  -7    0.07    0.22
  -6   0   7   -0.02    0.23
  -6   0   7    0.63    0.32
   3  -5  -2   15.92    0.86
   3   5  -2   16.16    0.48
   3  -5  -2   14.99    0.63
  -3   5   2   15.69    0.75
   3  -5  -2   16.27    0.56
   3   5  -2   15.48    0.47
   3  -5  -2   14.34    0.75
   3  -5  -2   15.86    0.99
  -3  -5   2   15.39    0.79
  -3  -5   2   15.16    0.54
  -3  -5   2   15.49    0.79
  -3   5   2   14.82    0.79
  -3   5   2   15.24    0.69
  -9   0   4    6.71    0.47
   9   0  -4    6.87    0.47
  -9   0   4    5.31    0.45
   9   0  -4    6.29    0.46
   9   0  -4    6.33    0.47
  -5   4  -1   32.32    1.06
  -5   4  -1   34.90    0.94
   5   4   1   35.99    1.22
   5  -4   1   34.63    1.11
  -5   4  -1   36.12    1.18
   5  -4   1   32.76    1.11
  -5   4  -1   33.86    1.29
   5  -4   1   33.46    1.17
   5   4   1   33.10    0.80
   5   4   1   34.89    1.21
   5   4   1   32.65    1.19
   3   4   3 1184.43   19.27
   3   4   3 1141.50   19.10
   3  -4   3 1080.08   18.52
   3  -4   3 1136.87   19.02
   3   4   3 1208.50   19.42
  -3   4  -3 1211.13   19.00
   3   4   3 1193.54   18.81
  -3  -4  -3 1200.55   19.35
  -3   4  -3 1128.40   18.85
   3  -4   3 1178.49   18.92
  -3  -4  -3 1154.56   18.75
  -3   4  -3 1167.41   18.97
   6   4  -1  184.92    3.83
   6   4  -1  193.61    3.64
  -6  -4   1  180.70    3.86
  -6  -4   1  184.38    3.84
   6  -4  -1  183.31    3.86
  -6   4   1  195.71    3.76
   6  -4  -1  191.35    3.48
  -6   4   1  185.09    3.70
  -6   4   1  188.75    4.22
   6  -4  -1  183.87    3.69
  -6   4   1  188.86    3.80
   9   1  -3   52.10    1.25
  -9  -1   3   48.33    1.48
  -9   1   3   52.14    1.38
   9  -1  -3   51.44    1.45
  -9  -1   3   49.72    1.17
  -9   1   3   48.34    1.49
  -9   1   3   50.85    1.37
   9   1  -3   50.78    1.41
   9  -1  -3   49.26    1.27
   9  -1  -3   51.10    1.50
  -9  -1   3   50.91    1.44
   9   1  -3   50.88    1.43
  -7   3   0  340.12    6.20
   7  -3   0  359.51    6.23
  -7   3   0  349.64    6.14
   7   3   0  347.82    6.44
  -7  -3   0  352.45    6.42
   7   3   0  341.27    5.70
   7  -3   0  351.70    6.40
   7   3   0  356.77    6.38
  -7  -3   0  344.73    6.60
  -7  -3   0  347.77    6.37
  -2   0  -6 1218.83   19.34
   2   0   6 1164.54   19.78
  -2   0  -6 1197.63   19.47
   2   0   6 1176.90   19.31
   2   0   6 1135.93   19.94
   6  -4  -3 4039.84   65.38
  -6   4   3 4099.71   65.47
  -6  -4   3 4005.30   65.31
  -6  -4   3 4054.07   65.42
   6   4  -3 4191.78   65.50
   6  -4  -3 4034.23   65.21
  -6   4   3 4107.33   65.29
  -7   1  -2 1212.00   19.60
  -7   1  -2 1206.78   19.76
  -7   1  -2 1204.99   20.23
  -7  -1  -2 1239.42   20.32
  -7   1  -2 1201.00   20.33
  -7  -1  -2 1215.07   20.47
   7   1   2 1212.88   19.71
   7  -1   2 1208.24   19.91
   7  -1   2 1195.33   20.23
  -7  -1  -2 1219.74   19.87
  -7  -1  -2 1204.24   19.62
   7  -1   2 1252.22   20.27
   2  -4  -5  104.02    2.33
  -2   4   5  102.90    2.56
  -2  -4   5   89.33    1.66
  -2   4   5   97.90    2.15
  -2   4   5   99.37    2.63
  -2  -4   5  105.84    2.09
   2  -4  -5   94.30    2.68
   2  -4  -5  111.57    2.65
  -2   4   5  101.98    2.30
   2  -4  -5  103.33    2.17
  -2  -4   5  101.57    2.09
   2   4  -5  105.21    2.02
  -2   4   5   97.48    1.99
  -2  -4   5  101.58    2.04
  -3   4   5  146.28    2.75
  -3  -4   5  140.99    3.29
  -3  -4   5  147.05    3.00
   3   4  -5  150.09    2.81
  -3   4   5  149.45    3.04
   3  -4  -5  155.35    3.49
  -3   4   5  152.97    3.43
   3  -4  -5  154.88    2.89
  -3   4   5  156.39    3.22
   3  -4  -5  155.15    3.21
  -3   4   5  157.24    3.64
  -3  -4   5  150.45    2.83
  -5   1  -4  195.89    4.09
  -5  -1  -4  195.31    3.79
   5   1   4  197.41    4.18
  -5   1  -4  192.84    4.22
  -5  -1  -4  196.66    3.66
   5   1   4  200.79    3.67
  -5   1  -4  196.42    3.71
  -5  -1  -4  197.77    4.33
   5  -1   4  193.66    4.06
  -5  -1  -4  201.51    4.20
   5   1   4  200.43    3.72
   5   1   4  191.82    4.15
  -5   1  -4  198.91    3.43
  -1  -1   7  563.90    9.42
  -1   1   7  536.10    9.35
  -1  -1   7  545.92    9.34
  -1  -1   7  541.90    9.43
   1  -1  -7  561.02    9.57
  -1   1   7  542.49    9.60
  -1   1   7  543.97    9.68
  -1   1   7  544.25    9.46
  -1  -1   7  545.34    9.51
  -3   2  -5  197.93    3.75
   3   2   5  200.20    3.91
   3   2   5  195.23    4.11
  -3  -2  -5  199.35    3.99
   3   2   5  198.50    3.79
  -3   2  -5  194.28    3.99
   3  -2   5  204.22    3.84
   3   2   5  190.55    4.19
   3   2   5  206.85    3.74
   3  -2   5  196.75    3.96
  -3  -2  -5  187.69    4.22
   1  -2   6    2.55    0.23
  -1  -2  -6    2.73    0.46
   1   2   6    1.71    0.50
   1  -2   6    2.70    0.33
   1   2   6    3.13    0.39
   1   2   6    2.62    0.41
   1  -2   6    1.94    0.34
  -1  -2  -6    2.23    0.46
   1   2   6    2.62    0.46
   1  -2   6    2.42    0.49
   1   2   6    2.33    0.30
  -1  -2  -6    2.70    0.45
  -1   2  -6    2.47    0.41
  -9   1   2   92.44    2.32
  -9  -1   2   96.62    2.38
  -9   1   2   95.33    2.22
   9   1  -2   97.93    2.25
  -9  -1   2  100.01    1.91
   9  -1  -2   94.83    2.22
   9   1  -2   96.33    2.28
  -9  -1   2   94.42    2.29
  -9   1   2   95.19    2.11
   9   1  -2   97.21    2.03
   9  -1  -2   96.74    2.12
   8   0  -6   42.29    1.23
  -8   0   6   41.55    1.16
  -8   0   6   40.04    1.20
  -8   0   6   40.90    1.24
   8   0  -6   41.93    1.14
   1  -3  -6    1.06    0.30
  -1   3   6    1.04    0.35
   1  -3  -6    0.62    0.32
   1   3  -6    1.03    0.27
  -1   3   6    0.73    0.39
  -1  -3   6    0.83    0.23
   1  -3  -6    1.21    0.50
   1  -3  -6    1.09    0.43
  -1  -3   6    1.12    0.23
  -1   3   6    1.09    0.38
  -6  -1   7  237.55    4.23
   6  -1  -7  230.30    4.55
  -6   1   7  239.25    4.59
  -6  -1   7  241.12    4.46
  -6   1   7  243.44    4.40
   6   1  -7  241.41    4.43
  -6   1   7  224.87    4.93
  -5  -3   6   11.09    0.52
  -5  -3   6   11.61    0.47
  -5  -3   6   10.19    0.69
  -5   3   6   11.46    0.63
  -5   3   6   12.14    0.74
  -5   3   6   11.00    0.84
  -5   3   6   11.29    0.43
   5  -3  -6   11.36    0.68
  -5   3   6   11.34    0.78
   1   5  -3  172.34    3.07
  -1  -5   3  177.36    3.59
  -1   5   3  170.53    3.45
  -1  -5   3  171.51    3.31
  -1  -5   3  169.47    3.40
   1  -5  -3  171.85    3.45
  -1   5   3  180.13    3.37
   1  -5  -3  174.87    3.79
   1  -5  -3  171.51    3.37
   1   5  -3  172.96    3.17
  -1  -5   3  168.33    3.60
  -1   5   3  170.49    3.26
   1  -5  -3  171.67    3.97
  -9   1   4  317.04    5.59
   9  -1  -4  318.85    5.80
  -9  -1   4  311.76    5.80
  -9  -1   4  305.16    5.70
  -9   1   4  306.56    5.85
   9  -1  -4  320.87    5.82
   9   1  -4  322.07    5.54
  -9  -1   4  308.37    5.49
  -9   1   4  320.09    5.73
   9   1  -4  318.17    5.71
   9  -1  -4  317.20    5.51
   9   1  -4  318.98    5.77
   2  -5  -3   63.48    1.86
  -2   5   3   64.34    1.59
  -2  -5   3   61.18    1.46
  -2   5   3   63.99    1.67
   2   5  -3   61.43    1.23
   2  -5  -3   61.85    2.07
  -2  -5   3   59.60    1.63
   2   5  -3   63.36    1.35
   2  -5  -3   63.77    1.49
  -2   5   3   63.29    1.44
  -2  -5   3   60.41    1.75
  -2  -5   3   63.93    1.76
   2  -5  -3   63.46    1.66
  -2   5   3   60.10    1.98
  -7  -2   6  112.47    2.57
   7   2  -6  111.70    2.07
  -7  -2   6  116.02    2.19
  -7   2   6  110.53    2.46
  -7   2   6  110.17    2.89
   7  -2  -6  112.13    2.40
  -7   2   6  109.72    2.57
  -7  -2   6  113.64    2.29
  -7  -2   6  115.54    2.17
  -7   2   6  108.64    2.99
  -7   2   6  108.70    2.06
  -8  -2   5  472.92    7.95
   8   2  -5  473.42    7.88
   8  -2  -5  444.18    8.16
  -8   2   5  480.01    8.32
  -8   2   5  466.44    7.73
   8   2  -5  480.78    8.30
  -8  -2   5  486.28    8.33
   8   2  -5  463.60    7.84
  -8   2   5  475.67    8.32
   8  -2  -5  466.87    8.33
  -8  -2   5  470.02    7.89
  -3  -2   7  257.77    4.70
  -3   2   7  265.26    4.93
  -3   2   7  266.80    5.21
  -3  -2   7  257.37    4.83
  -3   2   7  254.87    5.20
   3  -2  -7  261.05    4.99
  -3  -2   7  268.69    4.74
  -3   2   7  261.30    5.00
   1   4  -5  165.68    2.99
   1  -4  -5  172.52    3.40
  -1  -4   5  166.74    3.11
  -1  -4   5  164.49    3.07
   1  -4  -5  173.18    3.42
  -1   4   5  157.55    3.14
   1  -4  -5  152.78    3.61
   1  -4  -5  167.83    3.85
  -1   4   5  163.81    3.67
  -1   4   5  171.96    3.39
  -1  -4   5  156.98    3.16
   1   4  -5  163.82    3.11
  -1  -4   5  168.09    2.91
   2  -1   6    9.12    0.40
  -2   1  -6    7.42    0.64
   2  -1   6    8.59    0.50
   2   1   6    8.06    0.53
   2  -1   6    7.76    0.73
   2  -1   6    8.71    0.64
   2   1   6    9.14    0.56
   2   1   6    8.37    0.73
   2   1   6    9.32    0.51
  -2   1  -6    7.70    0.50
  -2  -1  -6    8.67    0.60
  -2  -1  -6    8.90    0.59
   2   1   6    8.23    0.66
  -2   1  -6    8.41    0.36
  -2  -1  -6    6.96    0.66
  -4  -2   7  306.39    5.46
  -4   2   7  308.17    5.60
  -4   2   7  300.26    6.03
  -4  -2   7  319.39    5.21
  -4   2   7  302.31    5.54
  -4  -2   7  316.84    5.44
  -4   2   7  314.75    5.79
   4  -2  -7  302.40    5.74
  -4  -2   7  304.41    5.56
  -4   2   7  297.74    6.01
   8   0   1   -0.09    0.23
  -8   0  -1    0.37    0.28
  -8   0  -1    0.14    0.38
  -8   0  -1    0.01    0.21
   8   0   1    0.03    0.33
   8   0   1    0.23    0.51
  -8   0  -1    0.54    0.39
  -4   4   5   37.90    1.20
  -4   4   5   39.80    1.58
  -4   4   5   38.00    0.84
   4  -4  -5   38.85    1.30
   4   4  -5   40.36    0.98
  -4  -4   5   41.41    0.99
  -4   4   5   39.57    1.45
  -4  -4   5   41.41    1.43
   4  -4  -5   40.04    1.54
  -9   0   1    0.03    0.37
   9   0  -1    0.23    0.36
   9   0  -1    0.17    0.30
  -9   0   1    0.35    0.23
   9   0  -1    0.12    0.26
  -9   0   1   -0.03    0.36
   8  -2   0  217.35    4.17
   8   2   0  210.79    4.27
  -8   2   0  214.91    4.23
  -8  -2   0  208.24    4.33
   8  -2   0  212.14    4.34
  -8  -2   0  218.44    4.21
  -8   2   0  216.55    4.03
   8  -2   0  211.78    4.19
  -8   2   0  214.71    4.33
   8   2   0  205.53    3.76
  -8  -2   0  216.21    4.47
  -8  -2   0  219.90    3.68
   4   0   5   -0.06    0.30
  -4   0  -5    0.26    0.40
  -4   0  -5    0.07    0.39
   4   0   5    0.40    0.21
  -4   0  -5    0.24    0.23
  -4   0  -5    0.34    0.25
   4   0   5   -0.03    0.42
   4   0   5    0.13    0.22
   2  -3   5    4.47    0.40
   2   3   5    3.00    0.62
   2   3   5    2.63    0.31
  -2   3  -5    3.09    0.42
   2  -3   5    3.54    0.39
  -2  -3  -5    2.67    0.47
  -2  -3  -5    2.99    0.52
   2   3   5    2.95    0.52
   2   3   5    3.03    0.38
   2   3   5    3.18    0.45
  -2  -3  -5    3.45    0.51
   3  -5   1   13.92    0.74
   3   5   1   12.68    0.71
   3   5   1   12.68    0.78
  -3   5  -1   14.07    0.84
  -3   5  -1   13.35    0.66
  -3   5  -1   14.44    0.69
  -3  -5  -1   14.63    0.83
  -3  -5  -1   14.00    0.54
   3  -5   1   13.66    0.61
   3   5   1   13.76    0.54
  -3   5  -1   13.19    0.62
   3  -5   1   12.94    0.65
   4   5  -1  195.59    3.68
   4  -5  -1  189.46    3.93
  -4  -5   1  183.61    3.91
  -4   5   1  198.37    3.81
   4   5  -1  194.58    3.24
   4  -5  -1  188.17    3.91
   4  -5  -1  193.52    3.69
  -4  -5   1  189.34    3.30
   4   5  -1  195.76    3.96
  -4   5   1  195.05    3.87
  -4  -5   1  187.72    3.91
  -4   5   1  186.71    4.23
   4  -5  -1  188.50    3.50
  -4   5   1  188.52    3.78
   8   1  -6  313.05    5.64
   8  -1  -6  319.95    5.88
  -8   1   6  315.81    5.88
  -8  -1   6  320.11    5.69
  -8   1   6  321.57    5.54
  -8   1   6  310.97    5.79
   8   1  -6  335.81    5.57
  -8  -1   6  320.39    5.63
  -8  -1   6  309.12    5.79
   8  -1  -6  317.87    5.73
   0   5   3 1341.29   22.00
   0  -5  -3 1361.25   22.54
   0  -5  -3 1375.47   22.18
   0  -5  -3 1334.48   22.82
   0  -5   3 1362.98   22.07
   0  -5   3 1362.42   22.32
   0   5  -3 1368.11   21.83
   0   5   3 1364.95   22.03
   0   5  -3 1323.85   21.89
   0  -5   3 1377.48   22.05
   0  -5   3 1335.75   21.73
   0  -5   3 1329.02   22.27
   0   5   3 1354.37   22.13
   0   5   3 1334.59   22.49
   0  -5  -3 1347.91   22.12
  -3   5   3  202.86    3.83
   3   5  -3  194.06    3.42
  -3  -5   3  199.94    3.91
   3   5  -3  187.97    3.29
   3  -5  -3  206.49    3.56
   3  -5  -3  200.71    3.96
  -3   5   3  205.66    4.16
  -3  -5   3  199.46    3.55
   3  -5  -3  205.31    4.19
   3  -5  -3  196.64    4.45
  -3   5   3  208.30    3.94
  -3   5   3  198.67    4.43
  -2  -5  -2  534.44    8.84
  -2   5  -2  529.96    8.92
  -2  -5  -2  517.30    9.19
  -2  -5  -2  521.81    9.40
  -2   5  -2  534.94    9.25
  -2   5  -2  525.41    8.84
   2   5   2  522.68    8.87
   2  -5   2  524.13    9.10
   2  -5   2  525.41    8.82
   2   5   2  507.41    9.31
  -2  -5  -2  512.08    9.61
   2   5   2  521.03    9.07
  -2   5  -2  517.48    8.89
   2  -5   2  518.41    8.92
   2  -5   2  533.82    9.33
  -7  -3   5   44.06    0.92
  -7   3   5   43.24    1.41
  -7  -3   5   41.31    1.00
  -7   3   5   39.21    1.66
  -7  -3   5   41.15    1.36
  -7   3   5   41.49    1.32
  -7  -3   5   41.91    0.96
  -6   4   0   51.00    1.39
   6  -4   0   54.07    1.36
   6   4   0   50.72    1.44
   6   4   0   50.88    1.52
   6  -4   0   49.75    1.41
   6  -4   0   51.21    1.50
  -6   4   0   53.45    1.74
  -6   4   0   53.71    1.33
   6   4   0   44.79    0.86
  -6  -4   0   44.76    1.54
  -6   4   0   53.08    1.50
   6   4   0   44.55    0.83
   0   0  -7    0.09    0.25
   0   0   7    0.16    0.27
   0   0   7   -0.15    0.30
   0   0   7    0.09    0.23
   0   0   7   -0.59    0.24
   0   0   7    0.10    0.43
  -2  -2   7    0.90    0.24
  -2   2   7    0.73    0.37
  -2  -2   7    0.89    0.25
  -2   2   7    1.13    0.37
   2  -2  -7    1.23    0.45
  -2   2   7    1.04    0.40
  -2  -2   7    1.11    0.29
   2  -2  -7    0.83    0.30
   4  -5  -2  369.86    6.92
  -4  -5   2  377.39    6.92
   4   5  -2  360.96    6.27
   4  -5  -2  370.04    7.39
  -4   5   2  388.81    7.00
  -4   5   2  388.00    6.78
   4   5  -2  381.30    6.20
   4   5  -2  383.29    6.98
  -4   5   2  370.83    7.35
   4  -5  -2  380.46    6.70
   4   5  -2  380.70    6.48
  -4  -5   2  389.91    6.31
   4  -5  -2  388.84    7.04
  -4   5   2  384.01    6.83
  -9   0   5    0.07    0.31
   9   0  -5    0.08    0.23
   9   0  -5   -0.10    0.27
  -9   0   5    0.20    0.23
   9   0  -5    0.14    0.23
  -9   0   5   -0.06    0.28
  -2  -4  -4  163.96    3.82
   2   4   4  189.46    3.58
  -2  -4  -4  188.53    3.94
   2  -4   4  182.00    3.19
  -2  -4  -4  188.97    3.54
   2   4   4  169.94    3.62
   2   4   4  188.18    3.91
  -2  -4  -4  192.20    4.12
  -2   4  -4  191.14    3.58
   2  -4   4  188.27    3.51
   2  -4   4  187.48    3.64
  -2   4  -4  182.14    3.49
   5   3   3   -0.17    0.42
   5   3   3   -0.02    0.33
   5   3   3    0.05    0.21
  -5  -3  -3   -0.03    0.34
   5  -3   3    0.02    0.29
  -5   3  -3    0.24    0.34
   5   3   3   -0.10    0.35
   5   3   3    0.05    0.15
  -5   3  -3   -0.02    0.24
   5  -3   3   -0.07    0.29
   5  -3   3    0.15    0.39
  -5  -2   7   47.58    1.06
  -5   2   7   49.03    1.31
  -5  -2   7   49.38    1.24
  -5   2   7   49.30    1.50
  -5   2   7   50.18    1.35
  -5   2   7   46.71    1.67
  -5   2   7   50.78    1.70
   5  -2  -7   46.59    1.45
  -5  -2   7   49.84    1.32
  -6  -3  -2    0.16    0.36
   6   3   2   -0.10    0.32
   6   3   2    0.14    0.38
  -6   3  -2    0.05    0.37
   6  -3   2    0.22    0.35
   6  -3   2    0.81    0.31
   6  -3   2    0.46    0.29
   6   3   2    0.21    0.20
   6   3   2    0.14    0.14
  -6   3  -2    0.06    0.25
   6   3   2   -0.12    0.32
  -6   3  -2    0.30    0.12
  -6  -3  -2    0.32    0.43
  -8  -1  -1   35.47    0.91
  -8   1  -1   34.37    1.30
   8  -1   1   36.18    1.14
   8   1   1   34.34    1.31
   8  -1   1   34.65    1.29
   8  -1   1   33.87    1.31
  -8   1  -1   36.71    1.03
  -8  -1  -1   33.48    1.35
  -8  -1  -1   36.51    1.34
  -8   1  -1   36.11    1.33
  -8  -1  -1   34.85    1.14
   8   1   1   35.39    0.99
  -6  -4   4    5.33    0.24
  -6  -4   4    5.20    0.56
   6  -4  -4    4.10    0.52
   6   4  -4    4.66    0.20
  -6  -4   4    5.05    0.22
  -6   4   4    5.24    0.51
  -6   4   4    4.48    0.54
  -6   4   4    5.90    0.57
  -6  -4   4    4.54    0.52
   6  -4  -4    4.61    0.43
  -7   0   7    0.07    0.29
  -7   0   7    0.12    0.25
  -7   0   7    0.80    0.29
   7   0  -7    0.02    0.22
   9  -1  -1    1.44    0.36
   9   1  -1    1.84    0.42
  -9  -1   1    2.14    0.24
   9   1  -1    1.51    0.27
  -9   1   1    2.00    0.34
  -9  -1   1    1.81    0.42
  -9  -1   1    2.01    0.47
   9  -1  -1    1.49    0.34
  -9   1   1    1.76    0.37
   9   1  -1    2.35    0.40
  -9   1   1    1.89    0.44
   8  -3  -3    0.14    0.12
  -8  -3   3    0.26    0.26
  -8   3   3    0.40    0.34
  -8  -3   3    0.41    0.34
   8   3  -3    0.07    0.25
  -8   3   3    0.40    0.37
   8  -3  -3    0.10    0.26
  -8   3   3   -0.03    0.36
   4   1   5    1.16    0.32
  -4  -1  -5    1.05    0.32
   4   1   5    1.23    0.38
  -4   1  -5    0.97    0.28
  -4   1  -5    1.18    0.39
   4   1   5    1.00    0.48
   4  -1   5    1.32    0.52
  -4   1  -5    1.19    0.19
  -4  -1  -5    1.09    0.45
   4   1   5    0.78    0.24
   4  -1   5    1.05    0.38
   8  -3  -2    3.19    0.35
   8  -3  -2    3.28    0.43
   8   3  -2    4.10    0.40
  -8   3   2    3.29    0.45
  -8   3   2    4.23    0.48
  -8  -3   2    4.96    0.53
  -8  -3   2    3.16    0.40
  -8   3   2    4.56    0.52
   4  -5   0   15.08    0.75
   4   5   0   14.35    0.78
  -4  -5   0   14.24    0.80
  -4   5   0   14.39    0.73
   4   5   0   15.17    0.74
   4   5   0   14.71    0.46
  -4   5   0   14.84    0.70
  -4  -5   0   14.90    0.46
  -4  -5   0   14.31    0.82
   4  -5   0   13.77    0.65
   4  -5   0   15.46    0.80
  -4   5   0   15.21    0.91
  -4   5   0   15.33    0.73
   4   5   0   14.48    0.82
   0   3   6  553.56    9.89
   0  -3  -6  549.87    9.61
   0   3   6  562.71    9.64
   0   3   6  542.81    9.66
   0  -3  -6  560.54    9.93
   0  -3  -6  558.29    9.86
   0   3  -6  549.03    9.42
   0  -3   6  556.89    9.47
   0   3  -6  554.52    9.49
   0  -3   6  567.76    9.39
   0  -3  -6  562.46   10.02
  -6   2  -3  111.36    2.36
  -6  -2  -3  106.70    2.87
   6  -2   3  113.99    2.78
   6   2   3  112.41    2.48
  -6   2  -3  112.54    2.67
   6   2   3  114.23    2.76
  -6  -2  -3  114.82    2.81
  -6  -2  -3  111.31    2.52
   6   2   3  112.93    2.22
   6  -2   3  109.32    2.65
   0   4   5  321.32    6.23
   0   4   5  309.87    5.80
   0  -4   5  319.09    5.76
   0  -4   5  324.83    5.53
   0   4  -5  322.33    5.68
   0   4  -5  323.25    5.63
   0  -4   5  310.50    5.55
   0  -4  -5  326.47    5.87
   0  -4  -5  322.64    6.41
   0   4   5  325.45    5.89
   0  -4  -5  336.82    6.11
   0  -4   5  336.00    5.55
   0  -1   7  211.30    4.15
   0  -1  -7  214.50    4.11
   0  -1   7  203.70    4.38
   0  -1   7  206.20    3.87
   0  -1   7  204.44    3.91
   0   1   7  197.78    4.06
   0  -1   7  201.55    4.00
   0   1   7  205.42    4.33
   0   1   7  212.05    4.38
   9  -1  -5   63.28    1.67
  -9  -1   5   62.44    1.51
  -9  -1   5   62.62    1.67
   9   1  -5   61.16    1.55
  -9   1   5   60.66    1.71
  -9  -1   5   63.26    1.61
   9  -1  -5   65.53    1.48
   9   1  -5   61.84    1.50
   9   1  -5   62.01    1.67
   9  -1  -5   62.83    1.71
  -9   1   5   64.49    1.70
  -5  -4   5  336.54    6.39
  -5   4   5  338.01    6.81
  -5   4   5  320.35    6.17
  -5  -4   5  341.29    5.77
  -5  -4   5  345.33    5.72
   5  -4  -5  336.79    6.34
  -6   3   6   60.97    1.91
  -6  -3   6   61.20    1.24
  -6  -3   6   62.58    1.34
  -6   3   6   63.15    1.58
  -6   3   6   61.96    1.71
  -6   3   6   59.92    2.02
   6  -3  -6   61.55    1.68
  -6  -3   6   65.88    1.79
  -9   2   3   18.46    0.82
  -9  -2   3   18.60    0.52
  -9   2   3   18.90    0.90
  -9  -2   3   18.96    0.89
   9  -2  -3   17.31    0.87
   9   2  -3   17.07    0.83
  -9  -2   3   19.01    0.81
  -9   2   3   17.76    0.71
   9  -2  -3   20.13    0.65
   9   2  -3   19.70    0.80
   4  -3   4    0.15    0.26
   4   3   4    0.20    0.26
   4  -3   4   -0.14    0.27
  -4   3  -4    0.37    0.24
   4   3   4   -0.06    0.48
   4  -3   4    0.03    0.40
  -4   3  -4    0.21    0.36
   4   3   4    0.68    0.36
  -4  -3  -4    0.19    0.42
   4   3   4    0.28    0.18
  -4  -3  -4    0.20    0.33
  -7  -1   7  192.19    3.83
  -7  -1   7  187.26    3.49
  -7   1   7  185.15    3.80
  -7   1   7  189.10    3.55
  -7  -1   7  191.26    3.67
   7  -1  -7  190.51    3.85
   7   1  -7  185.89    3.64
  -7   1   7  188.62    3.65
   1   5   3   22.32    0.89
  -1  -5  -3   23.63    1.02
   1   5   3   23.09    0.87
   1   5   3   23.63    1.06
  -1  -5  -3   24.20    1.23
   1  -5   3   22.71    0.90
  -1  -5  -3   22.48    0.83
   1  -5   3   23.80    1.00
   1  -5   3   22.91    0.82
  -1   5  -3   24.02    0.79
  -1   5  -3   21.66    0.77
   1  -5   3   26.31    0.75
  -1  -5  -3   22.87    1.08
   7  -2   2  111.34    2.58
  -7   2  -2  113.11    2.79
  -7  -2  -2  119.84    2.27
   7  -2   2  117.55    2.80
   7   2   2  115.77    2.79
   7   2   2  119.93    2.29
  -7  -2  -2  112.18    2.58
  -7   2  -2  121.15    2.47
   7  -2   2  114.93    2.75
  -7  -2  -2  115.24    2.96
  -7  -2  -2  126.32    2.90
   7   2   2  114.36    2.79
  -5   2  -4  303.37    5.63
   5   2   4  333.68    5.55
  -5  -2  -4  321.70    5.87
   5   2   4  316.60    5.78
   5  -2   4  313.69    5.97
   5   2   4  320.49    5.62
   5   2   4  311.05    6.10
   5   2   4  330.20    6.19
   5  -2   4  315.48    6.16
  -5   2  -4  318.88    6.02
   4   5  -3  146.41    2.56
   4  -5  -3  155.19    3.37
  -4   5   3  152.20    3.05
   4   5  -3  145.75    2.55
  -4   5   3  150.47    3.32
   4  -5  -3  151.31    2.97
   4  -5  -3  147.60    3.67
   4  -5  -3  147.82    3.18
  -4   5   3  147.71    3.12
  -4  -5   3  142.26    3.13
  -4  -5   3  151.46    2.66
  -1   2   7  650.35   11.30
  -1   2   7  629.93   11.33
   1  -2  -7  660.70   11.17
   1  -2  -7  679.83   11.54
   1   2  -7  646.84   10.96
  -1  -2   7  654.35   11.03
   1  -2  -7  651.40   11.44
  -1  -2   7  642.19   10.95
   8   3  -4    0.56    0.40
   8   3  -4    0.30    0.21
  -8  -3   4    0.44    0.10
  -8  -3   4    0.40    0.33
  -8  -3   4    0.45    0.26
  -8   3   4    0.40    0.36
  -8   3   4    0.55    0.39
  -8  -3   4    0.32    0.08
  -8   3   4    0.04    0.36
   8  -3  -4    0.34    0.26
  -9   2   2   51.20    1.38
  -9  -2   2   52.04    1.04
  -9   2   2   49.37    1.41
  -9  -2   2   51.37    1.50
  -9  -2   2   51.91    1.65
   9   2  -2   50.62    1.46
   9  -2  -2   48.65    1.26
   9   2  -2   51.87    1.55
   9  -2  -2   49.91    1.51
  -9   2   2   48.57    1.56
   9  -2  -2   51.78    1.58
   7   3   1  639.91   11.42
  -7   3  -1  656.82   11.42
  -7  -3  -1  654.51   11.49
  -7   3  -1  657.20   10.92
  -7   3  -1  653.80   11.12
   7  -3   1  654.99   11.40
   7   3   1  667.37   10.76
   7   3   1  663.83   11.46
  -7  -3  -1  643.92   11.36
   7   3   1  660.11   10.71
   7  -3   1  673.77   11.36
  -7  -3  -1  652.13   11.67
   8  -3  -1  837.14   13.19
   8   3  -1  817.19   13.40
   8  -3  -1  853.94   13.55
  -8  -3   1  808.50   13.45
  -8   3   1  808.31   13.33
  -8  -3   1  842.10   13.76
   8   3  -1  772.62   12.68
   8   3  -1  759.27   12.65
  -8  -3   1  834.85   13.53
  -8   3   1  877.85   13.52
  -6   2   7    6.88    0.71
  -6  -2   7    7.17    0.49
  -6   2   7    7.31    0.46
  -6  -2   7    7.98    0.59
  -6   2   7    7.81    0.62
  -6  -2   7    7.84    0.37
  -6   2   7    6.76    0.50
  -6  -2   7    7.38    0.42
  -5   4  -2   71.09    1.95
  -5   4  -2   68.87    1.82
  -5   4  -2   65.95    1.67
   5  -4   2   67.16    1.80
   5  -4   2   72.89    1.89
   5  -4   2   66.03    1.82
   5   4   2   68.29    1.48
   5   4   2   64.80    1.86
  -5  -4  -2   57.84    1.94
   5   4   2   67.11    1.97
  -5  -4  -2   66.41    1.92
   5   4   2   72.52    1.93
   5   4   2   71.12    1.40
  -9   2   4    3.01    0.46
  -9   2   4    3.39    0.49
   9   2  -4    2.49    0.45
  -9   2   4    2.96    0.29
   9   2  -4    3.49    0.26
  -9  -2   4    3.38    0.41
  -9  -2   4    3.22    0.26
   9  -2  -4    3.72    0.46
   9   2  -4    3.20    0.35
  -9  -2   4    3.35    0.44
   9  -2  -4    3.17    0.27
  -7  -4   2    9.06    0.71
   7  -4  -2   10.39    0.43
   7   4  -2    9.95    0.70
   7  -4  -2    9.88    0.64
  -7  -4   2   10.13    0.71
  -7   4   2    9.10    0.66
   7   4  -2    9.52    0.52
  -7   4   2    8.99    0.83
   7  -4  -2   11.30    0.76
  -7   4   2    9.62    0.65
   4  -4   3    5.41    0.47
  -4  -4  -3    5.11    0.61
   4   4   3    5.00    0.39
   4   4   3    4.56    0.54
  -4  -4  -3    4.31    0.55
  -4   4  -3    5.89    0.48
   4   4   3    4.01    0.52
   4  -4   3    4.88    0.56
   4   4   3    5.30    0.33
   4  -4   3    5.08    0.49
  -4   4  -3    4.90    0.52
   4   4   3    5.32    0.56
   2  -2   6   61.88    1.69
   2   2   6   60.15    1.84
  -2  -2  -6   59.79    1.91
   2  -2   6   56.86    1.88
  -2  -2  -6   63.28    1.82
   2  -2   6   63.37    1.59
   2   2   6   60.30    1.92
  -2   2  -6   61.51    1.74
  -2  -2  -6   62.06    1.75
  -2   2  -6   62.39    1.55
   2   2   6   63.73    1.55
   2   2   6   61.41    1.61
   2  -2   6   59.77    1.16
   2   2   6   60.68    1.69
  -9   0   0  971.67   16.84
   9   0   0 1002.52   16.63
  -9   0   0  995.09   16.75
  -9   0   0 1012.29   16.19
   9   0   0  958.57   16.37
  -7   4   3  306.77    5.90
  -7  -4   3  306.71    5.80
   7  -4  -3  300.88    5.85
  -7  -4   3  316.32    5.90
   7   4  -3  300.67    5.31
   7  -4  -3  310.16    5.68
  -2  -5   4   34.07    1.16
  -2  -5   4   35.66    1.11
   2  -5  -4   33.88    1.17
  -2  -5   4   30.88    1.21
   2   5  -4   34.28    0.89
  -2  -5   4   34.26    0.97
   2   5  -4   28.21    0.68
  -2   5   4   35.46    0.94
  -2   5   4   34.47    1.46
  -2   5   4   33.98    1.08
   2  -5  -4   37.25    1.06
   2  -5  -4   33.44    1.35
  -2   5   4   33.61    1.18
  -3   0  -6   68.53    1.61
   3   0   6   68.73    1.96
   3   0   6   62.65    1.49
  -3   0  -6   64.34    1.61
   3  -5   2  147.94    2.90
   3  -5   2  148.00    2.94
  -3   5  -2  150.42    2.83
  -3  -5  -2  142.01    2.80
   3   5   2  150.03    2.87
  -3  -5  -2  147.59    3.29
  -3   5  -2  156.57    3.30
  -3   5  -2  146.91    2.97
   3   5   2  145.42    3.30
   3  -5   2  147.40    3.16
  -3   5  -2  143.58    3.01
   3   5   2  153.40    3.20
  -8  -2   6   23.74    0.97
   8  -2  -6   23.46    0.99
  -8  -2   6   23.80    0.76
  -8   2   6   24.00    1.04
  -8   2   6   23.23    0.64
   8  -2  -6   24.23    0.90
  -8   2   6   23.56    0.96
  -8  -2   6   24.68    0.81
   8   2  -6   23.11    0.76
   8   2  -6   23.40    0.69
   5   5  -2  432.70    6.83
   5   5  -2  464.84    7.50
  -5  -5   2  433.76    7.33
   5  -5  -2  464.89    7.48
  -5   5   2  441.20    7.85
  -5   5   2  444.46    7.39
  -5   5   2  431.04    7.21
   5  -5  -2  463.93    7.13
  -5   5   2  447.71    7.23
   5  -5  -2  439.23    7.38
  -4   5  -1   -0.12    0.30
   4   5   1    0.03    0.37
  -4   5  -1   -0.03    0.37
   4   5   1    0.24    0.20
   4  -5   1    0.14    0.32
   4   5   1   -0.02    0.39
  -4   5  -1   -0.07    0.24
  -4   5  -1   -0.07    0.32
   4  -5   1    0.32    0.28
   4  -5   1    0.14    0.25
   4   5   1    0.20    0.32
  -4  -5  -1    0.25    0.38
  -4  -5  -1    0.01    0.15
   6  -4   1    1.52    0.40
   6   4   1    1.14    0.35
   6   4   1    1.31    0.19
   6  -4   1    1.35    0.35
  -6   4  -1    0.69    0.40
  -6   4  -1    0.95    0.23
  -6   4  -1    0.86    0.39
   1  -5  -4   80.78    1.89
  -1  -5   4   73.37    1.88
   1   5  -4   75.12    1.52
  -1  -5   4   75.76    1.76
   1   5  -4   73.09    1.64
  -1   5   4   74.08    1.79
  -1   5   4   77.44    1.76
  -1   5   4   76.67    1.92
   1  -5  -4   77.61    1.91
  -1   5   4   74.72    2.15
  -1  -5   4   74.26    2.03
  -1  -5   4   74.96    1.79
  -1  -5   4   77.25    1.44
  -5   5   1   17.83    0.83
   5  -5  -1   15.37    0.57
  -5   5   1   16.76    0.80
   5   5  -1   17.07    0.87
   5  -5  -1   17.11    0.73
   5  -5  -1   17.81    0.87
   5  -5  -1   17.15    0.87
  -5   5   1   16.39    1.00
  -5   5   1   15.45    0.79
   5   5  -1   17.09    0.72
  -3   5   4  236.24    4.15
   3  -5  -4  239.62    4.94
  -3   5   4  233.70    5.14
   3  -5  -4  238.66    4.65
   3   5  -4  236.92    4.14
  -3  -5   4  232.92    4.51
  -3  -5   4  232.31    4.23
  -3   5   4  240.31    4.51
  -3   5   4  241.87    4.63
   7   4  -1   53.80    1.52
  -7   4   1   56.58    1.68
  -7   4   1   53.81    1.55
   7  -4  -1   52.98    1.66
   7  -4  -1   55.42    1.60
  -7   4   1   56.97    1.97
   7  -4  -1   55.47    1.40
  -4   0   8    4.89    0.49
  -4   0   8    5.67    0.57
  -4   0   8    5.48    0.39
  -4   0   8    5.72    0.54
  -4   0   8    5.50    0.44
   1   0   7    0.07    0.46
   1   0   7   -0.08    0.23
  -1   0  -7   -0.02    0.24
   1   0   7    0.12    0.23
   1   0   7   -0.07    0.32
  -8  -2  -1  232.91    4.82
   8  -2   1  218.81    4.60
  -8   2  -1  223.82    4.56
   8   2   1  231.03    4.62
  -8  -2  -1  218.00    4.61
   8  -2   1  223.07    4.43
   8  -2   1  234.07    4.58
   8   2   1  231.54    4.04
  -8  -2  -1  223.18    4.41
  -8  -2  -1  226.14    3.96
  -8   2  -1  230.01    4.25
  -1   4  -5   23.52    0.82
   1  -4   5   23.93    0.79
  -1  -4  -5   24.20    1.08
  -1  -4  -5   23.03    1.10
   1   4   5   24.65    0.94
  -1   4  -5   23.64    0.84
   1   4   5   21.60    1.02
  -1  -4  -5   24.15    0.89
   1   4   5   22.42    0.97
  -1  -4  -5   24.60    1.21
   1  -4   5   22.85    0.87
   1  -4   5   23.06    0.64
   9   0  -6 1261.68   20.65
  -9   0   6 1267.86   20.74
   9   0  -6 1256.80   20.74
  -9   0   6 1260.62   20.77
  -9   0   6 1262.77   20.64
   7   0   3    0.27    0.37
  -7   0  -3    0.63    0.25
   7   0   3   -0.10    0.47
  -7   0  -3   -0.04    0.39
   7   0   3    0.10    0.25
  -7   0  -3    0.25    0.27
   9  -1   0   37.48    1.20
  -9  -1   0   38.29    1.44
  -9   1   0   39.01    1.36
   9   1   0   37.29    1.30
   9  -1   0   35.72    1.31
   9   1   0   35.25    1.04
  -9  -1   0   37.50    0.94
   9   1   0   36.94    1.32
  -9  -1   0   40.13    1.40
  -9   1   0   36.72    1.07
   9  -1   0   35.60    1.33
  -9  -1   0   35.84    1.19
   9   2  -1   92.35    2.33
  -9  -2   1   96.20    2.54
   9   2  -1   97.97    1.92
   9  -2  -1   99.75    2.23
  -9  -2   1   96.54    1.78
  -9  -2   1   98.17    2.38
   9  -2  -1   92.35    2.29
   9   2  -1   97.52    2.37
   9  -2  -1   95.21    2.40
  -9   2   1   91.69    2.18
  -9  -2   1   97.76    2.31
  -9   2   1   95.22    2.25
  -3   0   8  324.04    6.28
  -3   0   8  342.56    6.29
  -3   0   8  328.56    5.97
  -3   0   8  329.38    5.97
   4   2   5  216.30    4.23
   4   2   5  206.81    4.50
   4  -2   5  215.14    4.16
  -4  -2  -5  218.30    4.29
   4   2   5  211.53    4.59
   4   2   5  227.28    4.04
  -4   2  -5  218.51    4.40
   4  -2   5  207.17    4.34
   4   2   5  219.17    4.12
  -6   4   5 1971.60   33.19
  -6  -4   5 1985.19   32.60
  -6  -4   5 1994.88   31.84
   6  -4  -5 2021.10   32.31
   6  -4  -5 1962.18   32.55
  -6  -4   5 1989.99   31.78
  -5   0   8   -0.10    0.32
  -5   0   8    0.52    0.35
   5   0  -8    0.84    0.30
  -5   0   8    0.21    0.24
   3   3   5  232.42    4.24
   3  -3   5  224.43    4.24
   3  -3   5  222.87    4.66
   3   3   5  213.65    4.04
  -3  -3  -5  227.61    4.72
  -3   3  -5  220.63    4.35
   3  -3   5  223.20    4.29
  -3  -3  -5  228.72    4.63
  -3   3  -5  213.17    3.78
   3   3   5  219.93    4.51
   3   3   5  220.45    4.42
  -3  -3  -5  222.60    4.48
   3   3   5  219.09    4.68
   1  -3   6   23.94    0.59
   1  -3   6   25.40    0.90
   1  -3   6   22.27    0.64
  -1   3  -6   22.95    0.92
   1  -3   6   26.39    0.91
   1   3   6   24.05    0.86
  -1   3  -6   25.05    0.88
  -1  -3  -6   24.60    1.16
  -1  -3  -6   24.57    1.10
  -1  -3  -6   24.13    1.10
   1   3   6   23.97    1.06
   1   3   6   22.72    1.05
   1   3   6   24.19    0.94
   6   0   4    4.98    0.58
  -6   0  -4    6.02    0.46
   6   0   4    6.42    0.45
  -6   0  -4    5.12    0.64
  -6   0  -4    5.72    0.40
  -3  -4  -4    1.81    0.47
   3   4   4    1.69    0.41
   3   4   4    1.66    0.31
   3   4   4    1.71    0.42
  -3   4  -4    1.34    0.37
  -3   4  -4    2.25    0.33
   3  -4   4    1.49    0.32
  -3  -4  -4    1.48    0.49
   3  -4   4    2.15    0.39
  -3   4  -4    1.97    0.30
   3   4   4    1.80    0.45
   3   4   4    1.43    0.25
  -3  -4  -4    1.68    0.48
   8   0  -7    0.47    0.23
  -8   0   7    0.25    0.26
  -8   0   7    0.23    0.33
  -8   0   7    0.39    0.27
   8   0  -7   -0.05    0.27
   3  -1   6   21.65    0.84
   3   1   6   22.23    1.09
   3  -1   6   21.79    1.01
  -3  -1  -6   21.97    0.92
   3  -1   6   21.84    0.64
  -3   1  -6   21.70    1.04
   3   1   6   22.20    0.85
   3   1   6   23.29    0.83
   3   1   6   23.03    0.89
 -10   0   3    0.05    0.28
 -10   0   3   -0.05    0.36
  10   0  -3    0.09    0.29
 -10   0   3   -0.19    0.45
  10   0  -3   -0.09    0.30
  10   0  -3    0.03    0.30
   2   5   3    1.21    0.42
  -2  -5  -3    0.92    0.25
  -2   5  -3    1.05    0.30
   2  -5   3    1.41    0.26
   2  -5   3    1.22    0.27
   2  -5   3    1.09    0.32
  -2   5  -3    2.72    0.37
   2   5   3    0.99    0.33
   2   5   3    1.43    0.37
  -2  -5  -3    3.10    0.55
   0  -2   7  221.66    3.95
   0  -2  -7  216.80    4.41
   0   2   7  220.76    4.38
   0   2   7  213.57    4.40
   0  -2   7  218.12    4.16
   0  -2  -7  225.66    4.43
   0   2   7  206.42    4.60
   0   2   7  223.69    4.26
   0  -2   7  212.44    4.05
  -7  -3   6   98.60    1.99
   7  -3  -6   87.32    2.36
  -7  -3   6   94.77    2.39
  -7  -3   6   93.97    1.78
  -7  -3   6  103.03    1.91
  -7   3   6   96.60    2.81
   5   5  -3  130.01    2.16
   5  -5  -3  132.81    2.71
   5  -5  -3  128.11    2.91
   5  -5  -3  139.29    3.11
  -5   5   3  128.25    2.96
  -5  -5   3  128.28    2.86
  -5  -5   3  132.61    2.24
  -5   5   3  129.36    2.80
   5   5  -3  123.30    2.16
  -9   2   5   66.10    1.82
   9   2  -5   65.93    1.54
   9  -2  -5   65.12    1.74
  -9   2   5   67.41    1.82
  -9  -2   5   70.52    1.85
  -9   2   5   64.97    1.41
  -9  -2   5   68.39    1.61
  -9  -2   5   68.52    1.49
   9  -2  -5   65.07    1.82
   9   2  -5   65.77    1.44
   9   2  -5   65.26    1.83
  -7   4   4  102.10    2.46
   7  -4  -4  103.92    2.35
  -7  -4   4  104.45    2.43
  -7   4   4  101.77    2.80
   7  -4  -4  105.15    2.20
  -8   3   5    0.27    0.37
   8   3  -5    0.08    0.16
  -8  -3   5    0.23    0.21
  -8   3   5    0.20    0.50
  -8  -3   5    0.33    0.33
  -8  -3   5    0.13    0.20
  -8  -3   5    0.33    0.12
  -4  -1   8   48.56    1.39
  -4   1   8   50.63    1.61
  -4  -1   8   51.67    1.37
  -4  -1   8   50.99    1.46
  -4   1   8   49.00    1.66
  -4   1   8   49.12    1.31
  -4   1   8   47.85    1.50
  -4  -1   8   51.84    1.20
 -10   0   4  110.54    2.46
  10   0  -4  106.78    2.46
 -10   0   4   99.43    2.45
  10   0  -4  103.13    2.34
 -10   0   4  107.20    2.29
  10   0  -4  105.29    2.32
   0  -5   4  366.84    6.39
   0  -5   4  358.04    6.49
   0   5   4  367.50    6.97
   0  -5   4  363.30    6.57
   0   5   4  353.97    6.46
   0  -5   4  372.69    6.17
   0   5  -4  368.25    6.26
   0  -5  -4  381.50    6.71
   0   5   4  358.36    6.55
   0   5  -4  362.33    6.34
   0  -5  -4  366.82    6.57
   1  -1   7    8.99    0.54
   1  -1   7    9.21    0.65
   1  -1   7    9.32    0.48
  -1  -1  -7   10.23    0.73
   1   1   7   10.06    0.75
   1   1   7    9.05    0.77
  -1  -1  -7    9.68    0.63
   1   1   7    9.76    0.62
  -3   3   7  377.49    7.45
   3  -3  -7  401.91    7.68
  -3  -3   7  392.96    6.94
  -3  -3   7  391.13    6.85
   3  -3  -7  394.30    7.18
  -3   3   7  397.04    7.63
  -3   3   7  399.63    6.98
  -3  -3   7  400.85    6.64
   3  -4  -6   94.15    2.29
  -3   4   6   91.62    2.50
  -3   4   6   89.69    1.93
  -3   4   6   92.66    2.28
   3  -4  -6   97.19    2.07
   3  -4  -6   88.01    2.66
  -3   4   6   92.31    2.63
   3   4  -6   91.60    1.94
  -3  -4   6   91.47    1.96
  -4  -3   7  486.81    8.20
  -4  -3   7  456.91    7.80
  -4  -3   7  473.72    8.07
  -4   3   7  471.45    8.15
  -4   3   7  485.87    8.90
   4  -3  -7  482.01    8.51
  -4  -3   7  482.75    7.73
  -4   3   7  475.82    8.83
   4   5  -4  282.14    4.71
  -4   5   4  277.30    5.27
  -4  -5   4  265.78    5.17
  -4  -5   4  275.11    4.76
  -4   5   4  273.14    5.82
   4  -5  -4  259.93    5.25
   4  -5  -4  279.11    5.55
  -4   5   4  272.93    5.52
   9   1  -6    7.56    0.47
  -9  -1   6    7.67    0.52
  -9  -1   6    8.28    0.56
  -9   1   6    7.75    0.44
  -9  -1   6    7.64    0.52
   9   1  -6    7.67    0.46
   9  -1  -6    7.28    0.56
  -9   1   6    7.58    0.59
  -9   1   6    7.58    0.64
   9  -1  -6    7.76    0.52
  -7  -2   7  143.78    2.67
  -7   2   7  140.56    3.00
  -7  -2   7  139.64    2.87
  -7  -2   7  142.30    2.76
  -7   2   7  144.16    3.52
  -7   2   7  146.64    2.70
  -7  -2   7  139.44    3.16
  -7   2   7  139.50    3.55
   7   1   3   31.88    1.31
  -7  -1  -3   31.63    0.93
  -7   1  -3   32.52    1.34
  -7  -1  -3   29.85    1.03
   7  -1   3   33.30    1.29
  -7   1  -3   29.58    0.83
   7   1   3   32.59    0.97
   7  -1   3   32.08    1.33
   7  -1   3   30.96    1.06
  -7  -1  -3   32.79    1.41
  -7   1  -3   32.38    0.99
   8   0   2  252.40    4.74
   8   0   2  252.71    5.12
  -8   0  -2  264.29    4.62
  -8   0  -2  257.33    5.28
  -8   0  -2  254.38    4.67
   8   0   2  258.55    5.17
  -5   5   0  413.95    7.10
   5   5   0  399.62    7.29
   5   5   0  396.90    6.55
   5   5   0  406.16    7.21
   5   5   0  401.19    7.38
  -5  -5   0  387.66    7.32
   5  -5   0  400.73    7.13
  -5   5   0  406.28    7.24
   5  -5   0  402.12    7.36
  -5   5   0  413.87    7.66
   5  -5   0  389.87    7.18
  -8  -3   0    0.44    0.53
  -8  -3   0    0.57    0.38
   8   3   0    0.17    0.13
  -8  -3   0   -0.14    0.45
   8   3   0   -0.03    0.32
   8  -3   0    0.42    0.34
   8  -3   0    0.14    0.35
  -8   3   0    0.04    0.27
  -3  -1   8  290.88    5.37
  -3  -1   8  271.81    5.25
   3  -1  -8  291.07    5.38
  -3  -1   8  291.94    5.56
  -3   1   8  266.15    5.58
  -3   1   8  277.55    5.46
  -3  -1   8  284.40    5.18
  -3  -1   8  282.55    5.03
  -3   1   8  287.23    5.46
  -5   1   8  289.11    5.45
  -5  -1   8  294.37    5.29
  -5  -1   8  291.97    5.41
  -5   1   8  284.96    5.24
  -5   1   8  282.82    5.73
  -5  -1   8  296.05    5.09
  -5   1   8  289.18    5.80
   2  -4  -6    3.83    0.43
   2  -4  -6    3.57    0.42
   2  -4  -6    3.69    0.64
  -2   4   6    3.57    0.54
  -2   4   6    3.88    0.49
  -2  -4   6    3.49    0.35
   2   4  -6    2.80    0.34
  -2  -4   6    3.55    0.31
  -2  -4   6    3.55    0.21
  -2   4   6    3.67    0.44
  -2   4   6    2.20    0.51
  -2   0   8  295.69    5.83
  -2   0   8  302.83    5.72
  -2   0   8  300.18    5.36
  -2   0   8  294.33    5.48
  -2   0   8  302.23    5.81
  -6   1  -4  238.20    4.56
   6   1   4  246.64    4.56
  -6   1  -4  253.16    5.22
  -6   1  -4  260.17    4.34
  -6  -1  -4  243.46    4.67
   6  -1   4  242.94    4.67
   6   1   4  249.11    5.09
  -6  -1  -4  247.10    5.28
  -6  -1  -4  257.59    4.54
   6  -1   4  252.59    5.03
  10   0  -2  278.12    5.12
 -10   0   2  267.85    5.28
 -10   0   2  272.46    5.30
 -10   0   2  271.46    4.86
  10   0  -2  275.36    5.05
  10   0  -2  268.50    5.28
  -4   4   6    7.67    0.37
  -4   4   6    8.10    0.72
   4   4  -6    7.20    0.42
  -4   4   6    9.12    0.81
   4  -4  -6    8.86    0.62
  -4  -4   6    7.89    0.42
  -4  -4   6    7.42    0.67
  -8  -1   7    1.36    0.30
  -8  -1   7    1.39    0.33
  -8   1   7    1.53    0.29
   8   1  -7    1.44    0.24
   8  -1  -7    2.11    0.37
  -8   1   7    1.19    0.44
  -8   1   7    1.41    0.37
  -8  -1   7    1.29    0.33
   8  -1  -7    1.64    0.31
   8   1  -7    1.22    0.29
  10  -1  -3   94.57    2.27
  10   1  -3   92.59    2.02
 -10   1   3   93.53    2.20
 -10  -1   3   92.66    2.40
  10   1  -3   96.71    2.27
  10  -1  -3   93.59    2.06
 -10  -1   3   92.64    1.91
 -10   1   3   96.35    2.15
 -10   1   3   94.78    2.36
  10   1  -3   91.97    2.25
 -10  -1   3   93.26    2.28
  10  -1  -3   94.85    2.35
  -6   0   8  126.14    2.77
  -6   0   8  121.94    2.53
   6   0  -8  125.29    2.75
  -6   0   8  121.83    2.99
   2  -3  -7  379.25    6.87
  -2  -3   7  362.68    6.44
  -2  -3   7  381.33    6.60
   2   3  -7  371.92    6.61
   2  -3  -7  392.29    7.29
   2  -3  -7  392.97    7.33
  -2   3   7  374.54    7.17
  -2   3   7  369.74    7.13
  -2   3   7  382.96    6.79
   0  -6   0  388.77    7.00
   0   6   0  390.35    7.14
   0   6   0  385.60    6.79
   0  -6   0  392.54    6.96
   0   6   0  397.37    6.82
   0  -6   0  379.66    7.49
   0  -6   0  401.04    7.24
  -5   3   7  185.20    4.16
  -5  -3   7  193.00    3.49
  -5  -3   7  194.86    3.58
  -5   3   7  195.87    3.46
   5  -3  -7  197.13    3.94
  -5   3   7  196.88    4.32
 -10  -1   4    1.86    0.30
 -10   1   4    1.17    0.38
 -10   1   4    1.69    0.37
 -10  -1   4    1.59    0.40
 -10   1   4    1.26    0.43
  10   1  -4    1.65    0.35
  10  -1  -4    1.22    0.35
  10   1  -4    1.04    0.36
  10  -1  -4    1.48    0.37
 -10  -1   4    1.24    0.39
  10   1  -4    1.36    0.27
  10  -1  -4    1.72    0.30
   5   0   5    0.07    0.34
   5   0   5    0.14    0.22
  -5   0  -5   -0.08    0.43
   5   0   5   -0.01    0.20
  -5   0  -5    0.17    0.26
  -5   0  -5    0.65    0.25
   7  -4   0    6.48    0.55
   7   4   0    5.53    0.19
  -7  -4   0    6.80    0.73
   7   4   0    5.03    0.17
  -7   4   0    6.58    0.70
   7  -4   0    6.56    0.52
   7   4   0    7.56    0.57
  -7   4   0    6.33    0.48
  -7   4   0    7.08    0.63
   7  -4   0    7.06    0.61
  -8  -1  -2  233.12    4.11
   8  -1   2  217.97    4.35
  -8  -1  -2  225.61    4.89
   8  -1   2  224.70    4.69
   8   1   2  228.85    4.21
  -8   1  -2  224.11    4.74
  -8   1  -2  236.09    4.22
  -8  -1  -2  220.82    4.32
  -8   1  -2  228.26    4.09
   8  -1   2  230.06    4.70
   1   6   0    0.23    0.39
  -1  -6   0    0.03    0.43
  -1   6   0    0.27    0.32
  -1  -6   0   -0.06    0.28
   1   6   0    0.10    0.26
   1  -6   0    0.15    0.35
   1   6   0    0.11    0.22
   1  -6   0   -0.35    0.32
  -1   6   0    0.13    0.28
  -1  -6   0   -0.28    0.47
  -1   6   0   -0.41    0.35
   1  -6   0   -0.20    0.47
  -1  -6   0    0.17    0.30
   1  -6   0    0.35    0.30
  -2   1   8   51.96    1.51
  -2  -1   8   51.46    1.53
  -2  -1   8   50.55    1.41
  -2  -1   8   52.43    1.56
  -2   1   8   52.56    1.45
  -2   1   8   50.37    1.64
  -2   1   8   52.44    1.64
  10   1  -2  262.76    5.09
 -10  -1   2  254.40    5.23
  10   1  -2  261.64    5.01
  10  -1  -2  257.92    4.98
 -10  -1   2  267.50    4.57
  10  -1  -2  261.45    4.88
 -10  -1   2  255.80    5.10
  10   1  -2  261.86    4.76
 -10   1   2  256.01    5.03
 -10   1   2  269.05    4.82
   0   6  -1  192.65    3.91
   0  -6   1  185.16    3.85
   0   6  -1  195.60    3.67
   0  -6  -1  195.28    3.80
   0   6   1  196.10    3.84
   0   6   1  194.49    4.10
   0   6   1  199.60    3.70
   0  -6  -1  198.52    4.15
   0   6   1  191.66    3.75
   0   6  -1  201.46    3.65
   0  -6   1  193.88    4.25
   0  -6  -1  195.90    3.83
   0  -6   1  197.80    4.00
   0  -6   1  189.73    3.81
   1   6  -1   83.45    1.81
  -1  -6   1   85.06    2.20
  -1  -6   1   82.18    2.36
  -1  -6   1   82.94    1.95
  -1   6   1   84.70    2.20
   1   6  -1   83.43    1.79
  -1  -6   1   81.33    2.08
  -1   6   1   88.27    1.98
   1  -6  -1   88.70    2.27
  -1   6   1   84.82    1.99
   1   6  -1   82.54    2.12
   1  -6  -1   82.19    2.48
   1  -6  -1   85.61    1.96
   1  -6  -1   84.98    2.07
   1  -4  -6    2.30    0.37
  -1   4   6    2.62    0.45
  -1  -4   6    2.58    0.25
  -1   4   6    2.50    0.48
  -1   4   6    3.00    0.50
   1  -4  -6    2.45    0.43
  -1  -4   6    1.73    0.30
   1  -4  -6    1.94    0.57
   1   4  -6    2.50    0.33
  -1  -4   6    2.87    0.34
  -1  -4   6    2.25    0.22
  10   0  -5    0.61    0.28
  10   0  -5   -0.20    0.30
 -10   0   5    0.08    0.26
 -10   0   5    0.12    0.32
  10   0  -5    0.13    0.26
 -10   0   5   -0.02    0.34
   6   3   3   57.76    1.30
   6   3   3   55.59    1.65
  -6  -3  -3   57.41    1.71
   6   3   3   57.45    1.39
   6   3   3   58.63    1.83
  -6   3  -3   56.13    1.72
   6  -3   3   56.87    1.62
   6  -3   3   58.70    1.71
   6  -3   3   58.58    1.82
  -6   1   8  536.82    9.11
   6  -1  -8  523.26    9.33
  -6   1   8  528.99    9.72
  -6  -1   8  529.21    8.92
  -6   1   8  554.85    9.91
  -6  -1   8  520.87    9.08
  -6  -1   8  535.45    9.23
  -5   4   6   86.47    2.43
  -5   4   6   85.70    2.56
   5  -4  -6   84.74    2.20
  -5  -4   6   87.44    1.73
  -5  -4   6   85.63    1.80
  -5  -4   6   88.60    2.33
  -5   1  -5   13.23    0.85
  -5   1  -5   12.43    0.45
  -5  -1  -5   12.03    0.90
   5   1   5   11.68    0.58
   5   1   5   11.75    0.83
   5   1   5   11.95    0.62
   5  -1   5   11.09    0.62
  -5  -1  -5   11.70    0.60
   5  -1   5   12.06    0.79
  -5  -1  -5   12.43    0.67
   9  -3  -3   46.63    1.04
  -9   3   3   43.68    1.58
  -9  -3   3   47.48    1.56
   9   3  -3   47.28    1.31
   9  -3  -3   44.10    1.44
  -9  -3   3   43.97    1.33
   9  -3  -3   44.75    1.51
  -1  -5  -4  408.34    7.31
   1   5   4  376.76    7.04
   1  -5   4  400.79    6.82
   1   5   4  405.34    7.47
   1   5   4  400.21    7.04
  -1  -5  -4  392.26    7.01
   1  -5   4  396.26    7.10
  -1   5  -4  408.80    6.89
  -1   5  -4  390.63    6.89
   1  -5   4  377.72    7.05
   1  -5   4  407.38    6.78
   9  -2   0    4.30    0.62
  -9   2   0    4.74    0.51
  -9  -2   0    4.61    0.56
   9  -2   0    5.49    0.59
   9   2   0    5.59    0.58
  -9  -2   0    5.84    0.70
   9  -2   0    4.38    0.48
   9   2   0    4.67    0.35
  -9  -2   0    4.82    0.55
  -9   2   0    4.73    0.45
  -9  -2   0    4.62    0.28
   5   5  -4   51.82    1.07
  -5  -5   4   50.40    1.11
  -5  -5   4   51.17    1.57
  -5  -5   4   45.88    1.58
   5  -5  -4   52.11    1.62
   5  -5  -4   55.48    1.84
   5  -5  -4   51.20    1.42
  -5   5   4   49.11    1.91
  -5   5   4   50.83    1.71
   7  -3   2    0.30    0.35
   7  -3   2    0.38    0.45
  -7  -3  -2    0.59    0.38
  -7  -3  -2    0.47    0.46
  -7  -3  -2    0.08    0.46
   7   3   2    0.26    0.21
   7   3   2    0.34    0.35
   7   3   2    0.07    0.15
   4  -5   2  131.38    2.75
   4   5   2  130.66    3.07
   4  -5   2  126.90    2.93
  -4   5  -2  129.24    2.52
   4  -5   2  131.65    2.60
  -4   5  -2  135.53    3.04
  -4   5  -2  133.25    2.84
  -4  -5  -2  130.33    2.49
   4   5   2  129.23    3.04
   4   5   2  129.80    2.92
   4   5   2  127.56    2.54
  -4  -5  -2  134.08    3.12
   5  -3   4  312.14    5.94
   5   3   4  338.90    5.65
   5   3   4  316.08    6.02
  -5   3  -4  319.61    6.09
  -5  -3  -4  320.97    6.11
   5  -3   4  326.57    6.31
   5   3   4  322.13    5.73
   5  -3   4  313.77    6.04
  -2  -4  -5  217.30    4.60
  -2  -4  -5  210.20    3.99
   2   4   5  198.09    4.15
  -2  -4  -5  212.57    4.46
   2  -4   5  206.84    4.06
   2  -4   5  208.40    3.94
  -2   4  -5  207.88    4.02
   2   4   5  201.25    4.32
   2   4   5  206.00    4.02
   1   6   1   51.74    1.50
   1  -6   1   46.59    1.42
   1  -6   1   48.40    1.49
  -1  -6  -1   48.62    1.45
  -1   6  -1   49.77    1.33
   1   6   1   48.61    1.30
   1  -6   1   48.49    1.70
  -1   6  -1   47.69    1.43
   1  -6   1   47.21    1.41
   1   6   1   46.74    1.57
  -1  -6  -1   49.02    1.32
  -1   6  -1   48.40    1.31
   1   6   1   50.14    1.29
  -1  -3   7  176.49    3.45
   1   3  -7  170.68    3.43
  -1   3   7  170.93    3.64
   1  -3  -7  174.87    3.77
   1  -3  -7  181.58    3.67
   1  -3  -7  171.48    3.98
  -1  -3   7  179.48    3.37
  -1   3   7  176.95    3.90
   1  -3  -7  176.11    3.94
  -2  -6   1   67.18    2.11
   2  -6  -1   65.29    2.19
  -2   6   1   66.01    1.74
  -2  -6   1   70.04    1.89
  -2  -6   1   66.21    1.91
   2   6  -1   66.04    1.87
  -2   6   1   67.67    1.90
   2  -6  -1   70.72    1.97
   2  -6  -1   65.57    1.81
  -2   6   1   67.69    1.70
   2   6  -1   67.44    1.48
   2  -6  -1   67.75    1.63
  -2  -6   1   67.92    1.59
   2   6  -1   67.93    1.49
   6   5  -2   34.40    1.00
  -6   5   2   32.18    1.49
   6  -5  -2   32.80    0.85
   6  -5  -2   32.82    1.13
   6  -5  -2   31.13    1.27
  -6   5   2   32.88    1.23
  -1   0   8  847.77   14.38
  -1   0   8  833.34   14.71
  -1   0   8  836.95   14.59
  -1   0   8  866.36   14.23
   9   0   1   -0.02    0.28
  -9   0  -1   -0.06    0.25
  -9   0  -1    0.07    0.43
  -9   0  -1   -0.02    0.33
   9   0   1   -0.06    0.56
   9  -3  -2    0.39    0.35
  -9  -3   2    0.35    0.42
   9  -3  -2    0.40    0.30
  -9  -3   2   -0.02    0.33
   9  -3  -2   -0.03    0.35
   9   3  -2    0.65    0.32
   3  -2   6   54.30    1.48
   3   2   6   55.83    1.43
   3   2   6   54.27    1.82
  -3  -2  -6   54.07    1.68
  -3   2  -6   54.69    1.68
   3   2   6   54.72    1.51
   3   2   6   52.69    1.55
  -3  -2  -6   57.20    1.67
   3  -2   6   53.91    1.64
  -3  -2  -6   54.13    1.88
  -2   6   0  410.15    7.03
   2  -6   0  395.56    7.01
   2   6   0  371.64    6.80
  -2  -6   0  394.30    7.23
   2  -6   0  412.74    6.91
   2  -6   0  403.34    7.28
   2  -6   0  399.50    7.23
   2   6   0  403.42    7.25
   2   6   0  405.91    6.80
  -2  -6   0  400.19    6.89
   2  -6   0  395.76    7.68
  -2   6   0  397.22    7.03
   2   6   0  396.70    7.34
  -2   6   0  393.41    7.20
  10   0  -1   -0.09    0.29
 -10   0   1    0.02    0.23
  10   0  -1   -0.02    0.40
 -10   0   1   -0.30    0.40
  10   0  -1    0.03    0.35
 -10  -1   5   42.29    1.34
  10   1  -5   42.39    1.34
 -10   1   5   42.44    1.38
  10   1  -5   40.72    1.22
 -10   1   5   41.65    1.31
 -10  -1   5   41.29    1.15
  10  -1  -5   38.97    1.31
 -10   1   5   40.97    1.18
  10  -1  -5   43.59    1.17
  10  -1  -5   40.66    1.30
  10   1  -5   41.44    1.15
 -10  -1   5   40.35    1.27
  -6  -3   7  367.77    6.12
  -6  -3   7  330.17    5.66
  -6  -3   7  371.89    5.99
   6  -3  -7  372.70    6.54
  -6   3   7  372.80    7.08
  -6  -3   7  322.55    5.70
  -6  -3   7  379.85    6.67
  -6   3   7  374.48    6.94
  -7   4   5    9.21    0.91
   7  -4  -5    8.42    0.57
   7  -4  -5    7.99    0.67
  -7  -4   5    9.07    0.31
  -7  -4   5    9.02    0.68
  -7   4   5    9.23    0.77
  -9  -3   4  256.71    4.58
  -9   3   4  265.92    5.24
  -9  -3   4  230.92    4.03
   9  -3  -4  250.42    4.96
   9   3  -4  265.33    4.53
   9  -3  -4  260.55    4.85
  -9  -3   4  239.89    4.06
  -9  -3   4  261.57    4.98
   9  -3  -4  265.30    4.14
  -7   0   8    6.66    0.51
  -7   0   8    6.78    0.49
  -7   0   8    5.46    0.54
   7   0  -8    6.35    0.51
  -5  -5  -1  522.23    9.50
   5   5   1  491.59    9.29
   5   5   1  539.86    8.70
   5   5   1  502.69    9.41
  -5   5  -1  514.43    9.21
   5  -5   1  537.20    9.16
  -5   5  -1  540.27    8.96
   5  -5   1  519.63    9.36
  -5   5  -1  538.79    9.61
   5  -4   3   28.29    1.11
   5  -4   3   26.45    1.05
  -5   4  -3   31.11    1.15
  -5   4  -3   31.06    1.14
   5   4   3   31.30    0.84
   5   4   3   29.30    0.90
   5   4   3   25.69    1.18
   5   4   3   27.37    1.16
  -5  -4  -3   30.98    1.34
   5  -4   3   29.52    1.21
  -4   2   8   57.21    1.86
  -4  -2   8   59.72    1.26
  -4  -2   8   57.22    1.55
  -4  -2   8   55.38    1.46
  -4  -2   8   58.83    1.49
  -4   2   8   59.31    1.88
   4  -2  -8   56.29    1.68
  -4   2   8   56.92    1.61
   3  -5   3    0.64    0.27
  -3   5  -3    0.35    0.31
   3  -5   3    0.64    0.22
  -3   5  -3    0.44    0.31
  -3  -5  -3    0.54    0.24
   3   5   3    0.55    0.29
   3   5   3    0.23    0.37
   3   5   3    0.54    0.41
  -3  -5  -3    0.80    0.48
   3   5   3    0.26    0.37
   3  -5   3    0.67    0.33
   6  -5  -1   65.85    1.96
  -6   5   1   68.23    1.89
   6  -5  -1   71.36    1.63
  -6   5   1   71.45    2.26
   6   5  -1   72.35    1.77
   6  -5  -1   70.65    1.83
  -6   5   1   71.58    1.88
   1  -2   7  212.94    4.15
   1  -2   7  218.10    3.85
   1   2   7  213.77    4.53
  -1  -2  -7  216.02    4.63
  -1  -2  -7  222.90    4.47
   1   2   7  216.03    4.16
   1   2   7  220.86    4.72
   1   2   7  207.76    4.37
  -1  -2  -7  224.44    4.47
   1  -2   7  219.45    4.31
  -1  -6   2   21.23    0.96
  -1   6   2   21.59    0.89
   1   6  -2   21.09    0.73
  -1   6   2   21.38    1.03
  -1   6   2   21.58    0.86
  -1  -6   2   21.30    0.84
   1  -6  -2   21.22    0.83
   1   6  -2   20.55    0.92
   1   6  -2   21.09    0.71
  -1   6   2   21.79    0.84
  -1  -6   2   22.29    0.96
  -1  -6   2   21.64    1.09
   1  -6  -2   23.79    0.94
   2   0   7    0.07    0.37
  -2   0  -7    0.13    0.27
   2   0   7    0.60    0.26
  -2  -3  -6   75.33    2.25
   2   3   6   75.59    2.28
   2   3   6   74.52    2.13
   2  -3   6   78.84    1.92
  -2  -3  -6   77.65    2.15
   2   3   6   80.75    1.85
   2  -3   6   76.86    1.91
   2   3   6   79.20    1.95
  -2  -3  -6   79.50    2.26
   2   3   6   71.38    2.05
  -2   3  -6   74.27    1.96
  -6   4  -2  130.77    2.98
   6  -4   2  135.66    3.04
   6   4   2  133.51    3.14
   6   4   2  131.45    2.51
   6  -4   2  127.69    2.98
   6  -4   2  120.85    2.88
  -6   4  -2  137.50    3.14
   6   4   2  137.27    2.43
   6   4   2  129.17    3.01
  -6  -5   3   47.41    1.56
   6  -5  -3   45.47    1.56
   6  -5  -3   44.81    1.37
  -6   5   3   45.52    1.56
   9   2  -6   98.13    2.03
  -9  -2   6  103.79    2.13
  -9  -2   6  103.14    2.45
  -9   2   6   96.09    1.91
   9   2  -6   99.71    2.06
   9  -2  -6   99.19    2.45
  -9  -2   6  100.22    2.13
   9  -2  -6  100.77    2.32
   7  -2   3   76.51    2.16
  -7  -2  -3   73.26    1.61
   7  -2   3   70.98    1.86
  -7   2  -3   71.07    1.36
   7   2   3   73.07    1.62
  -7  -2  -3   70.41    1.87
   7  -2   3   72.53    2.05
  -7  -2  -3   72.69    2.30
  -8   4   3   78.63    2.12
  -8  -4   3   81.18    2.10
   8  -4  -3   75.75    1.89
   8   4  -3   78.13    1.63
  -8  -4   3   77.00    1.71
  -3  -2   8  189.43    3.60
  -3  -2   8  175.70    3.66
   3  -2  -8  193.73    3.86
  -3   2   8  186.19    4.07
  -3   2   8  186.34    3.82
  -3  -2   8  185.22    3.58
  -3   2   8  192.40    4.04
  -3  -2   8  175.17    3.27
  -2  -5   5    0.54    0.34
  -2   5   5    2.11    0.31
  -2  -5   5    0.42    0.32
  -2   5   5    0.50    0.42
   2   5  -5    0.38    0.24
   2  -5  -5    0.44    0.31
   2  -5  -5    0.33    0.30
  -2   5   5    0.73    0.45
  -2  -5   5    0.73    0.27
  -2   5   5    0.54    0.40
  -8  -4   2  187.70    3.74
   8  -4  -2  180.04    3.35
   8   4  -2  191.68    3.66
  -8   4   2  184.37    4.44
   8  -4  -2  185.07    3.82
  -8   4   2  189.34    3.91
   8  -4  -2  185.30    3.99
  -8  -4   2  190.20    4.03
   3  -5  -5   52.06    1.58
   3   5  -5   52.78    1.25
  -3   5   5   51.40    1.21
  -3   5   5   51.44    1.93
  -3  -5   5   53.24    1.47
  -3  -5   5   51.89    1.30
   3  -5  -5   53.27    1.34
  -5  -2   8    1.28    0.22
   5  -2  -8    1.11    0.37
  -5   2   8    1.25    0.32
  -5   2   8    0.99    0.47
  -5   2   8    1.29    0.36
  -5  -2   8    1.27    0.27
  -5   2   8    1.65    0.46
  -5  -2   8    1.02    0.30
  -1  -1   8  352.11    6.27
  -1  -1   8  343.69    6.42
  -1   1   8  337.57    6.60
  -1   1   8  344.03    6.46
  -1   1   8  345.51    6.71
   1  -1  -8  351.54    6.43
  -1   1   8  341.04    6.22
  -1  -1   8  338.49    6.19
   0  -6  -2    0.63    0.31
   0   6   2    1.00    0.40
   0   6  -2    0.37    0.35
   0   6   2    0.47    0.31
   0  -6   2    0.45    0.45
   0   6  -2    0.66    0.26
   0  -6   2    0.39    0.37
   0  -6   2    0.54    0.31
   0   6  -2    0.79    0.27
   0  -6  -2    0.22    0.29
   0   6   2    0.79    0.29
   0  -6   2    0.50    0.32
   0   6   2    0.30    0.32
   6  -2   4  411.19    7.69
   6   2   4  413.07    7.42
  -6  -2  -4  415.08    8.11
  -6  -2  -4  417.18    7.51
   6   2   4  425.61    7.28
   6   2   4  408.59    7.89
   6   2   4  425.36    7.21
   9  -1   1    0.40    0.30
  -9  -1  -1    0.59    0.22
   9  -1   1    0.64    0.40
  -9   1  -1    0.75    0.42
   9   1   1    0.78    0.39
  -9  -1  -1    1.16    0.42
   9   1   1    0.70    0.28
  -9   1  -1    0.67    0.28
   9  -1   1    0.43    0.56
  -9  -1  -1    0.28    0.42
  -2  -6   2   35.52    1.07
  -2  -6   2   36.09    1.43
   2  -6  -2   37.08    1.25
   2  -6  -2   37.54    1.08
   2  -6  -2   37.31    1.43
  -2   6   2   37.20    1.19
   2   6  -2   36.52    0.93
   2   6  -2   35.64    0.94
  -2   6   2   35.43    1.20
  -2  -6   2   36.42    1.30
  -2  -6   2   35.02    1.25
  -2   6   2   36.56    1.36
  -8   2   7  328.19    6.63
  -8  -2   7  340.08    5.70
  -8   2   7  315.75    6.75
   8  -2  -7  327.07    6.18
  -8  -2   7  329.85    5.84
  -8   2   7  332.18    5.58
   8  -2  -7  319.51    5.91
  -8  -2   7  307.43    6.14
  -8  -3   6  453.17    7.57
  -8  -3   6  445.35    7.43
  -8   3   6  438.57    8.82
  -8  -3   6  448.81    8.12
   0  -4  -6   41.38    1.31
   0   4   6   42.69    1.37
   0  -4   6   42.11    1.03
   0   4  -6   42.21    1.18
   0  -4  -6   41.05    1.65
   0   4   6   42.70    1.37
   0  -4  -6   42.06    1.47
   0   4   6   39.49    1.50
   0  -4   6   40.90    1.23
   0   4  -6   40.38    1.18
   0  -4   6   43.84    1.11
  10   2  -3    7.64    0.56
  10  -2  -3    5.87    0.41
 -10  -2   3    6.52    0.32
 -10   2   3    5.70    0.46
  10   2  -3    6.27    0.34
  10   2  -3    5.66    0.56
 -10  -2   3    6.58    0.67
 -10  -2   3    5.17    0.52
 -10   2   3    5.98    0.56
  10  -2  -3    6.95    0.61
 -10   1   1    7.53    0.51
 -10  -1   1    6.99    0.38
  10   1  -1    6.80    0.60
 -10  -1   1    7.85    0.70
  10   1  -1    8.84    0.68
 -10   1   1    7.45    0.64
  10  -1  -1    6.98    0.57
  10  -1  -1    7.28    0.57
  10   1  -1    7.25    0.48
  -9   0   7    0.05    0.32
  -9   0   7    0.02    0.27
   9   0  -7    0.47    0.32
  -9   0   7   -0.07    0.36
   9   0  -7    0.02    0.24
  -7  -1   8   42.73    1.29
   7   1  -8   42.14    1.28
   7  -1  -8   40.30    1.36
  -7   1   8   40.97    1.64
  -7  -1   8   41.77    1.38
  -7  -1   8   41.00    1.12
  -7   1   8   41.49    1.25
   4   0   6  484.53    8.31
   4   0   6  493.79    9.03
  -4   0  -6  510.88    8.48
   4   0   6  488.46    8.54
  -6  -4   6    0.02    0.17
  -6   4   6    0.20    0.46
  -6  -4   6    0.11    0.21
  -6  -4   6    0.27    0.39
   6  -4  -6   -0.29    0.35
  10   2  -4    2.93    0.27
 -10  -2   4    3.09    0.28
  10   2  -4    2.14    0.36
  10   2  -4    2.19    0.44
  10  -2  -4    2.40    0.44
  10  -2  -4    2.75    0.29
 -10  -2   4    2.31    0.46
 -10   2   4    2.73    0.35
 -10   2   4    3.05    0.47
 -10  -2   4    2.90    0.43
  -2   6  -1   33.00    1.13
  -2  -6  -1   34.39    1.01
   2  -6   1   34.15    1.17
  -2   6  -1   32.73    1.07
   2  -6   1   33.91    1.18
   2  -6   1   34.93    1.00
   2   6   1   32.97    1.18
  -2   6  -1   32.35    1.08
  -2  -6  -1   32.54    1.19
   2   6   1   32.76    0.97
   2  -6   1   34.01    1.44
   2  -6   1   32.14    1.19
   2   6   1   32.50    0.98
  -4   4  -4    3.34    0.48
   4  -4   4    2.76    0.42
  -4  -4  -4    2.48    0.53
   4   4   4    3.19    0.39
  -4   4  -4    2.49    0.37
   4   4   4    2.87    0.49
   4  -4   4    3.21    0.57
   4   4   4    2.06    0.47
   4   4   4    3.32    0.31
   4  -4   4    2.45    0.42
   3   6  -1   90.38    1.83
  -3   6   1   84.36    2.54
  -3  -6   1   88.85    2.25
   3   6  -1   91.00    1.77
  -3  -6   1   85.77    1.86
   3   6  -1   90.00    2.29
   3  -6  -1   87.35    2.28
  -3   6   1   91.52    2.14
   3  -6  -1   89.66    1.95
   3  -6  -1   89.07    2.00
  -3   6   1   88.83    2.28
   3  -6  -1   80.93    2.20
  -3   6   1   84.24    2.13
   3   6  -1   91.10    2.30
   2  -1   7  202.98    4.02
  -2  -1  -7  217.94    4.20
   2  -1   7  213.18    3.76
   2   1   7  207.45    4.01
  -2   1  -7  201.58    3.62
   2  -1   7  209.20    4.33
  -2  -1  -7  217.35    4.16
   2   1   7  203.29    4.47
   2   1   7  207.22    4.08
   1   5  -5   12.95    0.48
  -1   5   5   12.80    0.64
  -1  -5   5   13.12    0.65
   1  -5  -5   12.33    0.70
  -1  -5   5   13.80    0.65
   1   5  -5   13.37    0.58
  -1   5   5   12.66    0.87
  -1   5   5   11.80    0.73
   1  -5  -5   13.44    0.74
  -1  -5   5   13.34    0.42
  -1  -5   5   12.99    0.66
   8  -3   1   83.31    2.12
   8   3   1   81.06    1.64
   8  -3   1   76.65    2.15
  -8  -3  -1   81.96    2.39
  -8  -3  -1   75.15    2.10
  -8   3  -1   79.82    1.80
   8   3   1   82.18    1.63
  -8  -3  -1   79.52    2.23
   8   3   1   81.27    2.20
  -4   5   5   18.48    1.17
   4   5  -5   17.10    0.59
   4  -5  -5   17.19    0.89
  -4  -5   5   16.97    0.62
  -4  -5   5   17.03    0.83
  -4  -5   5   15.75    0.94
  -8  -2  -2  274.48    5.23
   8   2   2  280.49    4.86
   8  -2   2  266.14    5.42
   8  -2   2  280.83    5.46
  -8  -2  -2  267.36    5.71
   8  -2   2  274.78    5.23
   8   2   2  275.26    5.50
  -8   2  -2  271.04    4.73
  -8  -2  -2  276.12    4.81
  -8   2  -2  274.00    5.50
   9  -3  -1    4.23    0.51
   9  -3  -1    4.89    0.54
  -9  -3   1    5.15    0.55
   9   3  -1    4.53    0.25
   9  -3  -1    5.15    0.54
   9   3  -1    4.46    0.49
  -9  -3   1    4.06    0.68
   4   3   5    2.58    0.31
   4   3   5    2.27    0.50
  -4  -3  -5    2.07    0.55
   4  -3   5    2.91    0.40
   4   3   5    2.87    0.39
   4   3   5    2.55    0.47
   4  -3   5    2.86    0.46
  -4  -3  -5    2.56    0.50
  -4   3  -5    2.95    0.50
  -8  -4   4  482.79    8.06
  -8  -4   4  485.64    8.67
   8  -4  -4  482.72    8.64
   8   4  -4  454.00    7.95
   8  -4  -4  480.63    8.46
  -8   4   4  492.31    8.87
   2  -2  -8   81.37    2.28
   2  -2  -8   80.87    2.07
  -2  -2   8   80.08    1.95
  -2   2   8   77.16    2.21
  -2   2   8   83.02    2.20
  -2  -2   8   78.83    1.89
 -10  -2   2  674.66   11.34
 -10   2   2  646.69   11.12
 -10  -2   2  671.47   11.55
  10   2  -2  622.79   10.74
  10   2  -2  652.79   11.26
  10  -2  -2  657.63   10.95
  10  -2  -2  653.30   11.30
  10  -2  -2  640.89   11.41
 -10  -2   2  655.91   10.58
 -10   2   2  648.90   11.08
  -7   4  -1  468.16    8.62
   7  -4   1  444.41    8.28
   7  -4   1  475.49    8.30
  -7   4  -1  443.20    7.77
   7   4   1  466.98    8.35
  -7  -4  -1  444.29    8.55
   7   4   1  457.30    7.55
   7  -4   1  478.59    8.22
 -10   0   6   19.88    0.82
  10   0  -6   18.75    0.82
 -10   0   6   19.69    0.88
  10   0  -6   18.57    0.80
 -10   0   6   18.52    0.85
  -3  -6   0   95.31    2.39
   3  -6   0   93.37    2.35
   3   6   0   93.79    1.96
  -3   6   0   95.89    2.29
   3  -6   0   93.90    2.13
   3   6   0   94.79    1.91
   3  -6   0   93.92    2.68
   3  -6   0   96.06    2.34
   3  -6   0   96.33    2.11
  -3  -6   0   94.12    1.97
  -3   6   0   98.06    2.24
  -3   6   0   96.35    2.63
   3   6   0  101.75    2.46
  -3   6   0   94.75    2.21
   3   6   0   92.24    2.42
  -8  -4   1  273.00    5.55
  -8   4   1  274.01    5.20
  -8   4   1  274.68    5.86
   8  -4  -1  270.84    5.40
   8  -4  -1  282.07    5.00
   8   4  -1  272.08    5.21
   8  -4  -1  273.09    5.30
   1  -6   2  184.51    3.40
  -1  -6  -2  185.37    3.61
  -1  -6  -2  179.72    3.76
   1  -6   2  178.05    3.83
   1   6   2  188.14    3.61
   1   6   2  186.94    3.55
   1  -6   2  189.82    4.08
   1  -6   2  189.85    3.76
  -1   6  -2  192.58    3.68
  -1   6  -2  178.71    3.52
   1   6   2  185.69    3.72
   1  -6   2  183.75    3.74
  -1   6  -2  186.02    3.54
  -6  -2   8   49.33    1.31
  -6  -2   8   48.82    1.41
  -6   2   8   47.85    1.36
  -6  -2   8   49.20    1.15
  -6   2   8   50.92    1.83
  -6   2   8   47.79    1.79
  -9  -1   7   83.12    1.92
   9   1  -7   86.15    1.84
  -9  -1   7   81.04    2.04
   9  -1  -7   81.38    2.10
  -9  -1   7   80.69    1.96
  -9   1   7   81.71    2.13
   9   1  -7   78.67    1.91
  -9   1   7   83.67    2.08
  -9   1   7   86.77    1.85
   9  -1  -7   81.36    1.96
   6   5   0   35.55    1.20
  -6   5   0   38.10    1.13
   6  -5   0   36.19    1.31
  -6   5   0   36.88    1.48
   6  -5   0   36.59    1.17
  -6   5   0   36.16    1.25
   6  -5   0   36.71    1.12
  -3  -6   2  756.60   13.29
  -3  -6   2  764.42   13.31
  -3  -6   2  773.66   12.78
  -3  -6   2  773.10   13.56
   3   6  -2  766.27   12.63
  -3   6   2  772.84   13.39
   3  -6  -2  728.73   13.25
   3  -6  -2  774.54   13.44
  -3   6   2  764.13   13.13
  -3   6   2  786.01   13.85
   3   6  -2  793.93   12.62
   3  -6  -2  791.02   12.80
  -3   6   2  780.85   13.08
   0  -3   7  238.67    4.55
   0  -3   7  243.26    4.50
   0  -3  -7  242.94    5.03
   0  -3  -7  234.86    4.93
   0   3   7  237.81    4.79
   0  -3  -7  241.49    4.68
   0  -3  -7  240.81    4.97
   0   3   7  242.41    4.93
   4  -1   6   23.67    0.63
   4  -1   6   24.46    1.12
  -4  -1  -6   24.52    0.98
   4   1   6   25.64    0.89
   4   1   6   23.29    0.89
   4   1   6   24.24    1.17
  -9  -3   5  760.28   13.00
  -9  -3   5  746.38   12.14
  -9   3   5  772.72   13.40
   9   3  -5  762.64   12.40
  -9  -3   5  769.04   12.50
  -2  -5  -4   17.48    0.74
   2   5   4   17.76    0.79
   2   5   4   17.76    0.97
  -2  -5  -4   17.32    0.97
   2  -5   4   17.14    0.69
   2   5   4   17.54    0.86
  -2   5  -4   17.50    0.76
   2  -5   4   17.78    0.83
   5   2   5  467.44    8.20
  -5   2  -5  471.67    8.71
   5   2   5  472.84    8.88
   5   2   5  478.39    8.32
   5  -2   5  490.93    8.69
   5   2   5  487.13    8.43
  -5  -2  -5  491.75    8.55
   6  -5  -4    0.02    0.25
  -6   5   4   -0.05    0.50
  -6  -5   4    0.10    0.36
  -6  -5   4    0.15    0.12
   6  -5  -4   -0.26    0.39
  -6   5   4    0.37    0.40
   6   5  -4    0.10    0.07
  -7   3   7    0.26    0.12
  -7   3   7    0.55    0.50
  -7   3   7   -0.04    0.42
  -7  -3   7    0.67    0.36
  -7  -3   7    0.23    0.21
   7  -3  -7    0.10    0.37
   0   0   8  189.63    3.74
   0   0   8  190.60    3.80
   0   0   8  184.77    4.06
  10   1  -6  235.66    4.34
  10  -1  -6  226.82    4.44
 -10   1   6  231.49    4.54
  10   1  -6  233.35    4.30
  10  -1  -6  231.85    4.55
 -10   1   6  233.53    4.53
 -10   1   6  223.23    4.20
 -10  -1   6  236.30    4.33
 -10  -1   6  228.00    4.50
 -10  -1   6  221.17    4.38
 -10  -2   5    1.73    0.40
  10   2  -5    1.69    0.31
 -10   2   5    1.50    0.29
  10  -2  -5    1.64    0.40
  10   2  -5    1.56    0.44
 -10  -2   5    1.91    0.27
 -10  -2   5    1.35    0.37
  10   2  -5    1.52    0.23
  10  -2  -5    2.08    0.26
  10  -2  -5    1.10    0.33
   0  -5  -5  199.51    4.09
   0   5   5  187.79    3.84
   0   5  -5  188.67    3.69
   0  -5   5  201.53    3.88
   0   5  -5  201.72    3.64
   0   5   5  191.31    3.92
   0  -5   5  201.90    3.53
   0  -5  -5  193.28    3.91
   0  -5   5  200.31    3.67
   0   5   5  199.66    4.31
   8   0  -8  130.10    2.88
  -8   0   8  134.68    2.87
  -8   0   8  130.76    2.75
  -8   0   8  132.88    2.91
  -1  -6   3   14.18    0.82
  -1   6   3   13.00    0.74
  -1   6   3   13.55    0.67
   1  -6  -3   13.56    0.74
   1   6  -3   14.27    0.60
  -1  -6   3   13.40    0.84
   1  -6  -3   13.81    0.75
  -1  -6   3   13.76    0.74
   1   6  -3   14.29    0.54
  -1   6   3   14.81    0.73
  -1  -6   3   13.78    0.69
  -1   6   3   11.60    0.83
   2   6  -3   14.94    0.52
  -2   6   3   15.35    0.82
  -2   6   3   13.69    0.63
  -2  -6   3   14.07    0.65
  -2  -6   3   15.10    0.80
  -2  -6   3   15.22    0.84
   2  -6  -3   14.44    0.68
  -2   6   3   13.90    0.87
  -2  -6   3   14.16    0.87
   2   6  -3   15.94    0.59
   2  -6  -3   14.52    0.78
  -5  -5   5   28.50    0.79
   5   5  -5   29.05    0.77
   5  -5  -5   28.08    1.16
  -5   5   5   27.49    1.28
  -5  -5   5   24.16    1.16
  -5   5   5   25.28    1.40
  -5  -5   5   28.27    1.11
  10   0   0  274.45    5.05
  10   0   0  259.20    5.20
 -10   0   0  274.79    5.51
 -10   0   0  270.01    4.83
   0  -1   8  158.10    3.16
   0   1   8  154.07    3.36
   0  -1   8  156.25    3.20
   0  -1   8  151.40    3.42
   0   1   8  151.74    3.64
   0  -1  -8  158.48    3.35
  -3  -4  -5  134.49    3.29
   3  -4   5  131.89    2.82
  -3   4  -5  131.49    2.90
   3  -4   5  128.90    2.88
   3   4   5  131.23    3.10
   3   4   5  135.44    2.68
   3   4   5  128.92    2.79
  -1   2   8  727.98   12.88
  -1  -2   8  747.85   12.60
  -1   2   8  731.58   12.85
  -1  -2   8  727.57   12.47
  -1  -2   8  753.20   12.49
   1  -2  -8  754.19   12.96
  -7   0  -4  207.09    3.87
   7   0   4  200.94    4.43
  -7   0  -4  213.30    3.94
  -7   0  -4  205.89    4.61
   7   0   4  205.71    4.00
  -1   4  -6    3.12    0.41
   1   4   6    2.94    0.44
   1  -4   6    2.17    0.35
   1  -4   6    3.79    0.39
   1   4   6    2.00    0.47
  -1  -4  -6    3.32    0.42
   1   4   6    2.85    0.59
  -1  -4  -6    2.68    0.49
   3  -6   1  520.66    9.51
  -3   6  -1  528.76    9.33
   3  -6   1  536.00    9.21
   3   6   1  543.06    9.04
   3   6   1  518.64    9.47
   3  -6   1  523.22    9.39
   3  -6   1  535.23    9.36
  -3  -6  -1  527.53    9.03
  -3   6  -1  528.07    9.79
   3  -6   1  517.97    9.86
  -3   6  -1  535.13    9.31
   9   2   1  347.03    5.87
  -9  -2  -1  339.31    5.75
  -9  -2  -1  339.15    6.74
   9   2   1  320.63    6.45
  -9  -2  -1  333.64    6.25
   9  -2   1  333.36    6.48
   9  -2   1  344.79    6.38
   9  -2   1  327.22    6.27
  -9   2  -1  337.07    6.46
   4   6  -1  426.75    7.42
  -4  -6   1  409.84    7.69
  -4   6   1  417.62    7.63
   4   6  -1  427.07    6.91
  -4  -6   1  398.99    7.00
   4  -6  -1  434.52    7.73
  -4   6   1  442.32    7.54
   4  -6  -1  412.23    7.18
   4   6  -1  401.47    7.03
   4  -6  -1  408.61    7.68
  -4   6   1  446.73    8.27
   4  -6  -1  432.64    7.39
  -8   0  -3   -0.04    0.27
  -8   0  -3    0.35    0.46
   8   0   3    0.33    0.38
  -8   0  -3    0.04    0.24
   8   0   3   -0.05    0.27
   0  -6   3   34.21    1.33
   0   6  -3   35.37    0.98
   0  -6   3   35.71    0.89
   0  -6  -3   34.92    1.16
   0   6   3   34.47    1.11
   0  -6   3   33.85    1.29
   0   6  -3   33.42    1.00
   0   6   3   34.55    1.16
   0  -6   3   32.84    1.14
   0   6   3   35.26    1.14
   0  -6   3   32.92    1.15
   0  -6  -3   33.88    1.22
  10  -2  -1    0.88    0.38
 -10   2   1    1.61    0.42
  10  -2  -1    0.94    0.42
 -10  -2   1    1.76    0.48
 -10  -2   1    1.01    0.54
  10   2  -1    0.94    0.25
  10   2  -1    0.99    0.41
  10  -2  -1    2.15    0.47
   3   6  -3  188.38    3.32
  -3   6   3  179.95    4.03
   3   6  -3  183.71    3.23
  -3  -6   3  187.35    3.86
   3  -6  -3  191.14    3.48
  -3  -6   3  184.55    4.05
   3  -6  -3  179.83    3.86
  -3  -6   3  184.26    3.47
  -3  -6   3  176.56    3.89
   2  -6   2  450.00    8.42
   2   6   2  470.46    8.40
   2  -6   2  470.01    8.75
   2  -6   2  470.90    8.11
  -2  -6  -2  484.43    8.16
  -2   6  -2  474.90    8.24
  -2  -6  -2  491.07    8.57
  -2   6  -2  469.51    8.20
   2   6   2  489.17    8.17
   2  -6   2  474.87    8.45
  -2   6  -2  465.44    8.21
   2  -6   2  481.15    8.33
  -5  -5  -2  239.99    4.94
   5   5   2  228.56    4.03
  -5   5  -2  228.27    4.58
  -5   5  -2  241.23    4.81
   5   5   2  230.10    4.78
   5   5   2  234.94    4.16
   5   5   2  234.10    4.81
   5  -5   2  235.52    4.67
   5  -5   2  229.95    4.70
   5  -5   2  238.99    4.52
  -8   1   8   27.64    1.01
  -8  -1   8   27.89    1.04
  -8   1   8   29.70    0.98
  -8  -1   8   27.93    0.92
   8   1  -8   27.72    1.02
   8  -1  -8   26.50    1.08
  -8  -1   8   28.30    1.12
  -4   6   2    9.37    0.71
  -4  -6   2    8.22    0.67
   4   6  -2    8.79    0.50
  -4  -6   2    9.19    0.43
   4   6  -2    9.88    0.42
  -4   6   2   11.25    0.95
   4  -6  -2    9.19    0.70
   4  -6  -2    8.86    0.56
   4  -6  -2    9.00    0.45
   4  -6  -2   10.03    0.79
   4   6  -2    9.65    0.37
  -7   2   8    3.06    0.60
  -7  -2   8    3.63    0.36
  -7  -2   8    3.47    0.48
  -7   2   8    3.47    0.39
  -7  -2   8    3.49    0.42
  -7   2   8    4.24    0.66
   7  -4  -6   47.73    1.43
   7  -4  -6   46.67    1.56
  -7  -4   6   46.00    1.61
  -7   4   6   49.22    1.95
  -7  -4   6   46.77    1.05
  -8  -4   5  456.07    8.47
  -8   4   5  474.27    9.16
   8  -4  -5  473.89    8.25
  -8   4   5  464.59    8.69
  -7   5   2   49.40    1.94
  -7  -5   2   48.63    1.66
   7  -5  -2   47.09    1.64
   7  -5  -2   47.88    1.47
  -7   5   2   48.84    1.56
   7  -5  -2   49.79    1.15
   7   5  -2   49.04    1.32
  -4  -5  -3    5.33    0.68
   4   5   3    5.18    0.42
   4  -5   3    5.38    0.53
   4  -5   3    5.10    0.47
  -4   5  -3    5.30    0.54
  -4   5  -3    5.37    0.56
   4   5   3    5.53    0.64
   4   5   3    5.30    0.62
 -11   0   4   28.33    0.98
 -11   0   4   29.90    1.16
  11   0  -4   28.67    1.14
  11   0  -4   27.34    1.01
  11   0  -4   26.77    1.00
   3  -4  -7   24.72    1.07
   3   4  -7   27.37    0.91
  -3   4   7   25.35    1.29
  -3  -4   7   28.41    0.91
  -3   4   7   25.60    1.25
  -3   4   7   26.15    0.96
  10  -1   0  235.79    4.66
 -10  -1   0  224.98    4.11
 -10   1   0  227.78    4.29
 -10  -1   0  232.42    4.94
 -10  -1   0  230.50    4.48
 -10   1   0  235.69    4.78
  10   1   0  233.24    4.31
  10  -1   0  231.42    4.53
  10   1   0  234.61    4.78
  10  -1   0  226.73    4.78
 -11   0   3    0.03    0.29
  11   0  -3    0.38    0.35
 -11   0   3    0.33    0.44
  11   0  -3    0.37    0.37
  11   0  -3    0.09    0.36
   2   2   7  174.77    3.83
  -2  -2  -7  194.29    4.01
   2   2   7  190.86    3.67
   2   2   7  178.55    4.17
   2  -2   7  188.57    3.73
   2  -2   7  183.81    3.87
  -2   2  -7  178.72    3.91
  -2  -2  -7  184.60    4.23
  -2  -2  -7  187.37    3.96
  -4   4   7    5.40    0.65
  -4   4   7    5.30    0.70
  -4  -4   7    5.46    0.46
   4  -4  -7    5.89    0.57
  -4  -4   7    5.75    0.41
   9  -3   0   42.99    1.38
  -9  -3   0   43.13    1.50
   9   3   0   41.23    1.45
   9  -3   0   38.07    1.39
   9  -3   0   42.66    1.49
  -9   3   0   43.02    1.32
  -9  -3   0   42.93    1.68
  -8   4   0    2.78    0.39
   8   4   0    2.43    0.45
   8  -4   0    2.90    0.47
   8  -4   0    2.30    0.47
   8   4   0    1.73    0.12
   8   4   0    1.94    0.13
   8  -4   0    3.17    0.46
  -8  -4   0    1.93    0.63
   7  -5  -3  330.29    6.43
  -7   5   3  321.97    6.91
  -7  -5   3  325.70    6.46
  -7   5   3  337.91    6.43
   7   5  -3  337.46    5.80
   7  -5  -3  341.02    6.21
  -7   1  -4   75.30    2.32
  -7  -1  -4   75.30    2.42
  -7  -1  -4   79.21    1.93
  -7   1  -4   77.35    1.62
  -7  -1  -4   73.86    1.78
   7  -1   4   76.26    1.94
   7  -1   4   79.95    2.25
   7   1   4   80.84    1.85
   7   1   4   76.50    2.28
  -4   6   0    1.42    0.56
  -4   6   0    0.66    0.35
   4  -6   0    0.76    0.40
   4  -6   0    0.80    0.30
   4   6   0    0.92    0.22
   4  -6   0    0.50    0.30
  -4   6   0    1.15    0.40
  -4  -6   0    0.95    0.21
   4   6   0    1.16    0.35
   4  -6   0    0.80    0.41
  -4  -6   0    1.19    0.42
   3   3   6   51.19    1.38
   3   3   6   49.43    1.80
   3   3   6   51.53    1.61
  -3  -3  -6   55.62    1.79
  -3   3  -6   49.85    1.58
   3   3   6   50.73    1.47
   3  -3   6   47.85    1.51
  -3  -3  -6   53.13    1.71
   3  -3   6   48.88    1.47
  -3  -3  -6   48.94    1.82
   6   0   5    0.04    0.37
  -6   0  -5    0.16    0.27
   6   0   5    0.09    0.25
  -6   0  -5    0.14    0.47
  -8   1  -3  695.23   12.41
  -8  -1  -3  706.27   12.57
  -8   1  -3  711.04   11.47
   8   1   3  652.86   12.31
   8   1   3  677.83   11.66
   8  -1   3  686.55   11.86
  -8  -1  -3  696.24   11.79
  -8  -1  -3  703.05   11.60
   8  -1   3  709.35   12.27
   9   2  -7  270.36    4.93
  -9  -2   7  272.71    4.89
  -9  -2   7  263.85    4.97
  -9   2   7  278.15    4.73
   9  -2  -7  272.09    5.35
  -9  -2   7  265.78    5.28
   9   2  -7  283.24    4.80
   9  -2  -7  271.62    5.14
  -6   5  -1   76.71    1.71
   6   5   1   68.80    2.04
   6  -5   1   71.98    1.92
   6  -5   1   68.37    2.02
   6   5   1   74.58    1.47
   6   5   1   73.04    2.05
  -6   5  -1   68.89    2.15
  -6  -5  -1   72.27    2.21
   6  -5   1   71.48    1.90
   2   4  -7  260.65    4.70
  -2   4   7  248.42    4.79
   2  -4  -7  255.52    4.96
  -2  -4   7  254.24    4.72
   2  -4  -7  251.83    4.98
  -2   4   7  262.77    5.39
  -2  -4   7  255.28    4.39
  -4  -2  -6  139.99    3.09
  -4   2  -6  136.63    3.22
  -4  -2  -6  130.50    3.42
   4   2   6  136.05    2.99
   4  -2   6  134.87    2.95
   4  -2   6  137.05    3.15
   4   2   6  140.20    3.42
   4   2   6  138.03    2.82
   7  -5  -1   70.95    1.93
  -7   5   1   74.22    1.92
   7  -5  -1   76.20    1.73
   7  -5  -1   71.92    2.10
   7   5  -1   72.23    1.85
  -7   5   1   71.50    2.37
  -4  -3   8    4.10    0.42
  -4  -3   8    4.25    0.32
  -4  -3   8    3.89    0.37
  -4   3   8    4.22    0.62
  -4   3   8    3.53    0.45
  -4   3   8    3.69    0.58
   4  -3  -8    4.45    0.51
   3   0   7   -0.05    0.23
  -3   0  -7    0.34    0.32
   3   0   7    0.07    0.38
  -3   0  -7    0.28    0.31
  -5   4   7  269.74    5.89
   5  -4  -7  274.36    5.44
  -5  -4   7  280.53    4.89
  -5  -4   7  265.13    5.57
  -5   4   7  276.76    5.77
  -5  -4   7  274.23    4.99
  -9   0  -2  234.54    4.14
  -9   0  -2  219.39    4.83
   9   0   2  220.37    4.71
  -9   0  -2  222.07    4.20
   9   0   2  216.56    4.28
  -4   0   9   -0.04    0.37
  -4   0   9   -0.12    0.27
  -4   0   9    0.16    0.30
   1   3   7   89.66    2.64
   1  -3   7   93.39    2.17
   1   3   7   93.11    2.44
  -1  -3  -7   95.67    2.56
  -1  -3  -7   88.75    2.50
   1   3   7   91.25    2.43
   1   3   7   91.57    2.14
  -1   3  -7   93.68    2.27
   1  -3   7   90.72    2.17
 -11  -1   4    1.95    0.31
  11   1  -4    1.93    0.32
  11  -1  -4    2.25    0.44
  11  -1  -4    2.07    0.35
  11   1  -4    2.21    0.45
 -11   1   4    1.75    0.41
 -11  -1   4    1.91    0.42
 -11  -1   4    1.34    0.51
 -11   1   4    2.31    0.43
  11   1  -4    1.88    0.40
  11  -1  -4    1.07    0.37
 -11  -1   3  253.16    5.08
  11   1  -3  244.45    4.90
  11   1  -3  252.89    4.61
 -11   1   3  243.54    4.68
  11  -1  -3  249.77    4.66
 -11  -1   3  252.55    4.45
  11  -1  -3  250.14    4.89
 -11   1   3  247.64    4.87
 -11  -1   3  247.45    4.95
  11   1  -3  249.54    4.87
  11  -1  -3  255.91    5.07
  -5   0   9   -0.05    0.27
  -5   0   9    0.25    0.37
  -5   0   9    0.04    0.27
  -5   0   9    0.04    0.37
   1  -5   5  405.34    6.70
  -1  -5  -5  379.75    7.26
  -1  -5  -5  386.29    6.94
   1  -5   5  376.18    6.98
   1   5   5  381.54    6.95
   1   5   5  386.10    7.38
  -1   5  -5  395.11    6.79
   1   5   5  371.95    6.98
  -9   3   6    1.91    0.65
  -9  -3   6    2.45    0.45
   9   3  -6    2.13    0.24
  -9  -3   6    1.94    0.21
  -9   3   6    2.33    0.57
   9  -3  -6    2.45    0.45
   7   3   3    1.89    0.30
   7   3   3    2.05    0.49
  -7  -3  -3    1.76    0.47
  -7  -3  -3    1.91    0.58
   7  -3   3    1.71    0.58
   7   3   3    2.01    0.28
   7  -3   3    2.20    0.45
   1  -6   3    2.93    0.42
   1  -6   3    2.82    0.29
   1   6   3    3.55    0.47
  -1  -6  -3    3.70    0.41
   1   6   3    3.22    0.52
   1  -6   3    2.63    0.45
   1  -6   3    3.51    0.57
  -1   6  -3    3.76    0.39
   1   6   3    3.35    0.46
  -1  -6  -3    3.22    0.61
   1  -6   3    3.18    0.49
  -1   6  -3    3.35    0.37
  11   0  -5    0.42    0.34
  11   0  -5   -0.05    0.32
 -11   0   5    0.02    0.36
  11   0  -5    0.05    0.29
 -11   0   5   -0.04    0.32
 -11   0   5    0.40    0.40
   3  -3  -8    3.18    0.66
   3  -3  -8    2.69    0.43
  -3  -3   8    3.69    0.39
  -3   3   8    2.08    0.50
  -3   3   8    3.53    0.49
  -3   3   8    2.57    0.53
  -3  -3   8    3.62    0.34
 -11   0   2   45.63    1.22
  11   0  -2   43.95    1.52
 -11   0   2   44.06    1.57
  11   0  -2   45.38    1.37
  11   0  -2   46.73    1.44
   4   6  -3   46.88    1.03
  -4  -6   3   47.49    1.16
  -4  -6   3   46.86    1.57
   4  -6  -3   46.13    1.54
   4   6  -3   46.06    0.99
  -4   6   3   46.50    1.63
  -6   5   5   53.25    1.85
   6  -5  -5   55.34    1.74
  -6  -5   5   55.35    1.20
  -6   5   5   55.48    2.10
  -6  -5   5   52.89    1.75
  -5  -3   8   98.34    2.11
  -5  -3   8   95.52    2.20
  -5   3   8   95.39    2.72
  -5   3   8   97.37    2.75
   5  -3  -8   96.50    2.46
   6   3   4   15.51    0.68
   6   3   4   14.98    0.61
   6  -3   4   14.24    0.85
   6   3   4   15.28    0.85
   6  -3   4   15.16    0.82
  -6  -3  -4   14.81    0.87
  -3   5  -4    3.84    0.45
   3  -5   4    4.02    0.50
  -3  -5  -4    3.91    0.37
  -3   5  -4    4.45    0.44
   3   5   4    3.81    0.42
   3   5   4    4.04    0.57
  -3  -5  -4    3.32    0.59
   3  -5   4    4.16    0.41
   3   5   4    3.22    0.54
   8  -3  -7  357.86    6.53
  -8   3   7  359.50    7.42
  -8  -3   7  360.08    6.79
  -8  -3   7  363.77    6.30
  -8  -3   7  366.29    6.17
  10  -2  -6  174.31    3.60
 -10  -2   6  173.17    3.41
  10   2  -6  172.71    3.24
 -10  -2   6  174.94    3.68
  10  -2  -6  168.83    3.72
 -10   2   6  170.59    3.17
  10   2  -6  177.25    3.34
  -6  -1  -5   92.29    2.16
  -6  -1  -5   88.89    2.68
   6   1   5   92.69    2.06
  -6   1  -5   91.01    1.80
   6  -1   5   90.06    2.15
   6   1   5   87.66    2.50
   6   1   5   90.32    2.08
   6  -1   5   86.73    2.42
  10   3  -3   45.45    1.33
 -10  -3   3   38.57    1.44
 -10   3   3   38.40    1.11
  10  -3  -3   42.30    1.45
 -10  -3   3   43.93    1.38
  10  -3  -3   43.32    1.51
  10   3  -3   39.61    0.78
  10  -3  -3   43.93    1.05
   6   4   3    8.68    0.41
   6   4   3    9.00    0.74
   6  -4   3    7.77    0.63
   6   4   3    7.84    0.47
  -6   4  -3    8.67    0.69
   6  -4   3    7.63    0.63
   6   4   3    8.06    0.70
   6  -4   3    7.50    0.73
 -10   0   7   -0.02    0.28
 -10   0   7   -0.33    0.42
  10   0  -7   -0.15    0.27
  10   0  -7    0.17    0.30
 -10   0   7    0.10    0.35
  -3   0   9    0.10    0.29
  -3   0   9   -0.07    0.29
  -3   0   9    0.24    0.37
   1   0   8 1181.65   20.01
  -1   0  -8 1208.43   19.39
   1   0   8 1172.51   19.49
   1   0   8 1159.56   19.52
   7   5  -4  194.95    3.35
  -7  -5   4  197.90    4.22
   7  -5  -4  192.03    4.17
   7  -5  -4  188.51    3.91
  -7   5   4  198.06    4.29
   3  -1   7   98.36    2.50
   3  -1   7   81.08    2.13
  -3  -1  -7  101.78    2.33
   3   1   7   91.42    2.15
   3  -1   7   90.38    1.84
   3   1   7   92.87    2.18
  -3   1  -7   98.57    1.93
  -3  -1  -7   98.30    2.30
   3   1   7   87.83    2.55
  -6   0   9    0.25    0.40
   6   0  -9   -0.03    0.31
  -6   0   9   -0.04    0.29
  -9   1  -2  132.48    3.37
   9  -1   2  133.17    3.29
   9  -1   2  136.39    3.02
  -9   1  -2  147.03    2.77
   9   1   2  139.55    2.87
  -9  -1  -2  138.38    3.54
  -9  -1  -2  142.58    2.75
  -9  -1  -2  139.85    2.99
  10   3  -4    2.94    0.17
  10  -3  -4    3.00    0.52
  10  -3  -4    3.04    0.25
  10   3  -4    3.02    0.39
 -10  -3   4    2.41    0.50
 -10  -3   4    2.96    0.42
  -4   1   9    0.45    0.38
  -4  -1   9    0.02    0.26
  -4  -1   9    0.30    0.32
  -4  -1   9   -0.04    0.42
  -4   1   9    0.35    0.42
  -4  -1   9    0.34    0.26
  -4   1   9    0.45    0.39
   9  -4  -3    6.96    0.60
   9   4  -3    8.44    0.54
  -9  -4   3    6.86    0.69
  -9  -4   3    7.96    0.57
  -9   4   3    8.37    0.90
   9  -4  -3    6.68    0.29
  -9   4   3    7.12    0.67
  -3  -5   6  537.04    9.28
   3  -5  -6  539.07    9.71
  -3   5   6  542.52   10.09
   3  -5  -6  555.24    9.37
   3   5  -6  541.95    9.22
  -3  -5   6  562.68    9.45
  -3   5   6  559.49   10.33
  -5  -1   9   33.65    1.19
  -5   1   9   36.29    1.11
  -5   1   9   35.85    1.46
  -5   1   9   33.34    1.27
  -5  -1   9   32.74    1.10
  -5  -1   9   34.08    0.98
  -5   1   9   35.39    1.37
   8   3   2  276.72    4.81
   8  -3   2  278.13    5.47
  -8  -3  -2  269.62    5.78
   8   3   2  277.34    5.57
   8  -3   2  280.05    5.50
   8   3   2  273.33    4.86
   7   4   2   51.78    1.73
   7  -4   2   49.55    1.63
   7   4   2   51.66    1.21
   7  -4   2   50.67    1.66
  -7   4  -2   52.89    1.79
  -7   4  -2   52.31    1.11
   7  -4   2   50.71    1.61
   0   2   8    2.92    0.41
   0   2   8    2.67    0.48
   0   2   8    3.07    0.59
   0  -2   8    2.91    0.39
   0  -2   8    2.73    0.35
   0  -2  -8    3.21    0.59
   0  -2   8    2.95    0.42
   0  -2  -8    2.18    0.52
  11   1  -5   47.47    1.50
  11  -1  -5   46.72    1.50
  11   1  -5   47.95    1.43
 -11   1   5   48.32    1.41
  11  -1  -5   47.38    1.50
  11  -1  -5   53.48    1.38
  11   1  -5   47.58    1.31
 -11  -1   5   46.31    1.48
 -11  -1   5   45.99    1.47
 -11  -1   5   47.62    1.29
 -11   1   5   49.66    1.47
 -11  -1   2  312.31    5.31
  11   1  -2  307.61    5.53
  11  -1  -2  294.95    5.75
  11  -1  -2  285.97    5.92
 -11  -1   2  305.80    6.05
 -11   1   2  306.47    5.89
  11   1  -2  314.78    5.93
 -11   1   2  306.17    5.55
  11  -1  -2  310.46    5.68
   5   4   4   61.44    1.40
  -5  -4  -4   58.76    1.97
   5  -4   4   60.64    1.71
   5  -4   4   53.67    1.67
  -5   4  -4   59.39    1.61
  -5   4  -4   57.18    1.72
   5   4   4   55.71    1.90
   5   4   4   57.00    1.77
   5   4   4   55.02    1.46
  -1   4   7  373.22    7.13
  -1  -4   7  354.77    6.54
  -1  -4   7  367.52    6.29
  -1   4   7  359.33    6.67
   1  -4  -7  375.62    6.89
   1  -4  -7  370.84    6.77
  -2   5   6  317.61    6.50
  -2  -5   6  319.31    5.85
  -2  -5   6  317.10    5.85
   2   5  -6  330.91    5.80
   2  -5  -6  340.15    6.05
   2  -5  -6  338.84    6.22
   2  -6  -4  599.83   10.12
   2  -6  -4  610.19   10.40
   2   6  -4  572.17    9.65
  -2  -6   4  594.39   10.08
   2   6  -4  594.46    9.88
  -2  -6   4  597.55   10.28
  -2  -6   4  597.08   10.60
  -2  -3   8   49.18    1.31
   2  -3  -8   49.35    1.56
  -2   3   8   50.40    1.74
   2  -3  -8   51.54    1.86
  -2   3   8   48.80    1.56
  -2  -3   8   50.62    1.39
   9  -4  -2  243.62    4.83
   9   4  -2  244.73    4.64
   9  -4  -2  243.36    4.32
  -9   4   2  245.91    4.86
  -9  -4   2  243.17    4.73
  10  -3  -2   30.53    1.24
  10   3  -2   29.99    0.67
 -10  -3   2   30.03    1.38
  10  -3  -2   30.43    0.97
  10   3  -2   30.32    1.16
 -10  -3   2   34.73    1.26
  10  -3  -2   30.13    1.23
 -10   3   2   31.46    1.04
   4  -5  -6    7.69    0.66
  -4   5   6    7.08    0.74
  -4   5   6    7.20    0.80
   4   5  -6    6.81    0.42
  -4  -5   6    7.97    0.72
  -4  -5   6    7.48    0.62
  -4  -5   6    6.52    0.42
  -9   0   8 1287.77   21.52
  -9   0   8 1300.76   21.38
  -9   0   8 1311.74   21.40
   9   0  -8 1298.34   21.48
  -3   6  -2  237.20    4.49
  -3  -6  -2  240.13    4.86
   3  -6   2  233.45    4.37
  -3   6  -2  240.56    4.85
  -3   6  -2  236.87    4.37
   3  -6   2  231.88    4.70
   3   6   2  228.65    4.87
   3   6   2  241.87    4.33
  -3  -6  -2  228.18    4.27
  -6   4   7   19.86    1.13
  -6  -4   7   17.13    0.70
   6  -4  -7   17.86    0.96
  -6  -4   7   18.46    0.65
  -6   4   7   17.77    1.18
  -6  -4   7   17.93    1.02
  -5   6   2   52.85    1.98
   5  -6  -2   52.47    1.73
   5   6  -2   52.29    1.16
   5  -6  -2   51.06    1.69
  -5   6   2   53.70    1.70
  -5  -6   2   53.48    1.72
   5  -6  -2   53.74    1.51
   5   6  -2   51.24    1.00
  -6  -3   8   97.14    2.13
  -6  -3   8  101.15    2.24
  -6   3   8   97.89    2.77
   6  -3  -8  103.08    2.55
  -6   3   8   93.95    2.88
  -6  -3   8  100.82    2.60
 -10  -1   7  104.33    2.33
  10  -1  -7  101.44    2.35
  10   1  -7  103.07    2.21
 -10   1   7  100.33    2.17
 -10  -1   7  105.70    2.43
  10  -1  -7   98.48    2.45
  10   1  -7   98.91    2.25
 -10  -1   7  101.11    2.30
  -4  -6  -1   52.10    1.23
   4   6   1   55.07    1.26
  -4   6  -1   57.04    1.90
  -4   6  -1   53.21    1.46
   4   6   1   54.72    1.72
   4  -6   1   54.60    1.55
   4   6   1   53.45    1.76
  -4   6  -1   54.08    1.58
   4  -6   1   53.05    1.47
  -4  -6  -1   51.92    1.71
   4  -6   1   52.53    1.67
  -3  -1   9    7.69    0.62
  -3  -1   9    7.60    0.56
  -3   1   9    8.41    0.59
  -3  -1   9    7.40    0.63
  -3   1   9    7.88    0.72
  -3   1   9    7.76    0.67
  -3   1   9    8.52    0.65
  -8   2   8   52.49    1.98
  -8  -2   8   54.01    1.37
  -8  -2   8   54.50    1.71
   8  -2  -8   55.65    1.71
  -8  -2   8   51.46    1.46
  -8   2   8   49.04    2.01
  -8   2   8   54.33    1.31
  -9   4   4  112.23    2.88
   9   4  -4  112.97    2.30
  -9  -4   4  111.14    2.82
   9  -4  -4  108.11    2.63
   1  -6  -4   98.27    2.37
  -1   6   4   97.76    2.16
   1  -6  -4  102.35    2.32
  -1  -6   4   96.23    2.54
   1   6  -4   95.34    1.93
  -1  -6   4   99.58    2.29
  -1  -6   4   93.19    2.24
  -1   6   4   98.43    2.37
   1   6  -4   96.17    2.05
  -1  -6   4   96.77    2.46
   5  -6  -1   96.28    2.53
   5   6  -1  100.36    2.27
  -5   6   1  102.07    2.84
   5  -6  -1  102.82    2.51
  -5   6   1   98.13    2.42
   5  -6  -1  102.19    2.31
   5  -6  -1   96.88    2.06
  -5  -6   1   98.30    2.56
   5   6  -1   94.63    1.72
   1   1   8  184.05    4.25
   1  -1   8  190.93    3.83
   1   1   8  192.59    3.95
   1  -1   8  192.03    4.12
  -1  -1  -8  195.01    3.96
   1  -1   8  202.25    3.73
  -3   6   4  100.64    2.92
  -3  -6   4  104.14    2.58
  -3  -6   4  106.35    2.56
   3   6  -4  104.63    1.96
  -3  -6   4  106.13    2.42
  -3   6   4  107.05    2.70
  -3  -6   4  103.81    2.12
   3  -6  -4  101.25    2.47
   3  -6  -4  109.58    2.13
   5   0   6   32.57    1.11
   5   0   6   31.60    1.35
   5   0   6   30.46    0.92
  -5   0  -6   32.30    1.50
  -5   0  -6   32.65    1.02
  -6   1   9   43.79    1.28
  -6  -1   9   42.23    1.16
   6  -1  -9   43.43    1.45
  -6   1   9   39.99    1.63
  -6  -1   9   43.95    1.29
  -6   1   9   44.16    1.66
   5  -3   5 1281.55   21.55
   5   3   5 1335.13   21.10
  -5  -3  -5 1295.23   22.09
   5   3   5 1275.38   21.48
  -5  -3  -5 1315.43   21.67
   5  -3   5 1287.87   21.45
   5   3   5 1251.67   21.21
  10  -2   0    2.23    0.65
  10   2   0    2.07    0.30
 -10  -2   0    2.29    0.57
  10  -2   0    1.39    0.42
  10  -2   0    1.71    0.45
 -10   2   0    2.23    0.49
  10   2   0    3.26    0.54
   7  -5   0  148.80    3.10
  -7   5   0  147.87    3.68
   7  -5   0  141.03    3.17
  -7   5   0  151.47    3.08
   7  -5   0  141.19    3.34
   7   5   0  147.54    3.24
   2   4   6  204.94    4.04
  -2   4  -6  204.75    4.04
   2  -4   6  204.11    4.03
   2   4   6  204.46    4.35
  -2  -4  -6  210.76    4.49
   2  -4   6  207.45    3.95
   2   4   6  200.72    3.88
  -2   0   9    0.03    0.35
  -2   0   9    0.51    0.45
  -2   0   9    0.05    0.29
   7  -2   4  223.49    4.61
   7   2   4  212.84    4.04
  -7  -2  -4  209.62    4.33
   7  -2   4  218.39    4.33
  -7  -2  -4  226.27    4.99
   9   1  -8  375.74    6.82
  -9   1   8  375.82    6.92
  -9  -1   8  390.01    6.99
  -9  -1   8  387.42    6.89
  -9   1   8  375.77    6.69
   9  -1  -8  388.20    7.10
  -9  -1   8  380.50    6.74
   9  -1  -8  384.44    6.78
  -8  -2  -3   27.46    1.10
  -8  -2  -3   26.84    1.39
   8  -2   3   24.94    1.18
  -8   2  -3   26.41    0.69
   8   2   3   27.46    0.88
  -8  -2  -3   27.77    0.86
   8  -2   3   23.97    1.03
  -8   4   6    2.56    0.65
  -8  -4   6    1.92    0.46
   8  -4  -6    1.43    0.35
  -8   4   6    2.36    0.55
   8  -4  -6    1.48    0.46
  -8  -4   6    1.86    0.20
   1  -5  -6   15.54    0.80
  -1   5   6   15.27    0.96
   1  -5  -6   16.84    0.88
  -1  -5   6   16.16    0.75
   1   5  -6   14.23    0.56
   1   5  -6   16.11    0.70
  -1   5   6   15.22    0.74
  10   3  -5  922.70   14.99
 -10  -3   5  899.62   15.54
  10  -3  -5  888.02   15.51
 -10   3   5  906.38   15.91
   2   6   3   10.36    0.63
   2   6   3   10.06    0.68
   2   6   3    8.91    0.78
   2  -6   3    9.38    0.51
   2  -6   3    9.89    0.69
  -2  -6  -3    9.54    0.56
   2  -6   3   10.11    0.79
  -2  -6  -3   10.01    0.79
  -2   6  -3    9.70    0.59
 -10   0  -1   -0.10    0.25
  10   0   1   -0.07    0.33
 -10   0  -1   -0.02    0.37
 -10   0  -1    0.04    0.45
   7   0  -9    0.17    0.32
  -7   0   9   -0.16    0.27
  -7   0   9    0.16    0.47
  11   0  -6  437.96    7.57
 -11   0   6  415.90    7.56
 -11   0   6  428.71    7.60
  11   0  -6  436.43    7.65
 -11   0   6  428.94    7.72
  11   0  -6  418.33    7.62
  -5   5   6   81.55    2.60
  -5  -5   6   80.57    1.71
  -5  -5   6   77.50    2.30
   5  -5  -6   77.48    2.18
  -5  -5   6   76.89    2.03
   5  -6  -3   86.86    2.29
   5   6  -3   76.93    1.54
   5  -6  -3   86.89    2.05
  -5  -6   3   80.40    2.26
  -5   6   3   86.23    2.68
   5   6  -3   83.13    1.53
  -5   6   3   84.67    2.33
  11   0  -1    0.17    0.32
  11   0  -1    0.11    0.40
 -11   0   1    0.30    0.44
 -11   0   1    0.52    0.28
  -5  -1  -6  357.99    6.31
   5   1   6  344.21    6.79
   5   1   6  345.95    6.16
   5  -1   6  344.06    6.65
  -5  -1  -6  345.84    6.97
   5   1   6  346.00    6.14
   0   6   4   95.53    2.22
   0  -6   4   98.85    1.91
   0   6   4   96.50    2.33
   0  -6   4   97.69    2.29
   0  -6  -4   97.59    2.30
   0  -6   4   94.01    2.50
   0  -6  -4   94.94    2.38
   0   6  -4   94.37    2.09
   0   6   4   94.06    2.62
   0   6  -4   95.41    2.01
   0  -6   4   97.05    2.23
  11  -2  -4  113.12    2.25
  11   2  -4  104.47    2.50
  11  -2  -4  109.73    2.69
 -11   2   4  106.59    2.36
  11  -2  -4  109.06    2.68
 -11  -2   4  102.57    2.67
 -11  -2   4  113.49    2.59
  11   2  -4  111.24    2.18
  11  -2  -3    1.07    0.46
  11  -2  -3    1.29    0.34
 -11   2   3    1.03    0.38
 -11  -2   3    1.77    0.60
  11   2  -3    1.64    0.27
 -11  -2   3    0.74    0.41
  11   2  -3    1.43    0.41
   8  -4   1  388.38    7.53
   8  -4   1  423.29    7.48
  -8  -4  -1  404.97    7.88
  -8   4  -1  417.56    7.02
   8  -4   1  411.73    7.54
   8   4   1  404.43    7.56
   8   4   1  398.35    6.75
   4   6  -4   58.43    1.26
   4  -6  -4   58.34    1.77
  -4   6   4   58.35    1.92
  -4  -6   4   57.40    1.81
  -4   6   4   58.46    2.18
  -4  -6   4   56.85    1.38
   5  -6   0   68.33    1.69
   5   6   0   66.98    1.87
  -5  -6   0   64.23    1.96
   5  -6   0   70.84    1.91
   5   6   0   70.65    1.35
   5  -6   0   68.08    2.00
  -5   6   0   72.96    2.25
  -5   6   0   71.38    1.84
   5  -6   0   69.81    1.79
  -9  -4   1   19.94    0.98
   9  -4  -1   19.57    0.98
  -9   4   1   20.99    0.95
  -9  -4   1   18.06    1.14
   9   4  -1   18.87    0.93
   9  -4  -1   18.81    0.82
   4  -4   5  346.16    6.60
   4   4   5  352.56    6.42
   4  -4   5  357.50    6.59
  -4   4  -5  367.40    6.68
   4   4   5  363.89    6.29
  -4  -4  -5  361.91    7.14
   4   4   5  355.81    6.80
  -2   1   9  103.37    2.43
  -2  -1   9  103.75    2.38
  -2   1   9  101.70    2.63
  -2   1   9  105.09    2.80
  -2  -1   9  108.30    2.55
   2  -5   5   11.50    0.71
   2   5   5   11.10    0.82
  -2  -5  -5   11.24    0.84
  -2  -5  -5   11.51    0.64
  -2   5  -5   12.40    0.68
   2  -5   5   11.64    0.61
   2   5   5   10.73    0.67
   2   5   5   10.51    0.74
  -1   3   8   89.22    2.59
  -1   3   8   95.12    2.47
  -1  -3   8   98.89    2.19
   1  -3  -8   97.14    2.71
   1  -3  -8   96.70    2.40
  -1  -3   8   96.92    2.23
   9   3   1   12.19    0.84
   9   3   1   12.44    0.50
   9  -3   1   11.44    0.78
   9  -3   1   11.85    0.81
  -9   3  -1   12.11    0.62
   9   3   1   12.78    0.51
   9  -3   1   13.55    0.87
  -9  -3  -1   12.72    0.99
  -6  -2  -5   24.02    1.05
   6   2   5   24.43    0.93
   6   2   5   24.14    1.02
  -6  -2  -5   23.08    1.32
   6   2   5   25.42    1.27
   6   2   5   25.93    0.89
   6  -2   5   24.71    1.16
  10   3  -1  597.16   10.56
  10  -3  -1  608.73   10.74
  10  -3  -1  592.17   10.64
 -10  -3   1  587.55   10.91
  10  -3  -1  608.06   10.32
 -10  -3   1  596.62   10.64
 -10  -1  -1  117.89    2.33
  10  -1   1  113.53    2.92
 -10   1  -1  117.55    2.99
 -10  -1  -1  113.29    3.09
  10  -1   1  114.25    2.67
 -10   1  -1  116.46    2.45
  10   1   1  114.82    2.93
 -10  -1  -1  115.15    2.64
  10   1   1  116.80    2.49
  -7  -1   9    3.16    0.37
  -7   1   9    3.44    0.64
  -7  -1   9    3.22    0.37
   7  -1  -9    2.82    0.46
  -7   1   9    3.18    0.62
   7  -5  -5   47.46    1.49
   7  -5  -5   48.81    1.67
  -7   5   5   51.92    1.82
  -7  -5   5   50.50    1.68
  -7   5   5   47.38    2.00
  11   1  -6    2.33    0.36
 -11   1   6    3.25    0.44
  11  -1  -6    2.48    0.44
  11   1  -6    3.48    0.39
 -11  -1   6    3.26    0.47
  11  -1  -6    3.17    0.46
  11   1  -6    2.56    0.47
 -11  -1   6    2.54    0.44
 -11  -1   6    2.75    0.40
   0  -4   7   37.52    1.21
   0   4   7   37.33    1.48
   0  -4   7   37.90    1.10
   0  -4  -7   36.43    1.30
   0  -4  -7   37.76    1.44
   0   4   7   37.33    1.39
  -7   3   8   16.20    1.09
  -7  -3   8   16.53    0.66
  -7  -3   8   16.39    0.74
  -7   3   8   17.21    1.15
  -7  -3   8   18.44    0.99
   7  -3  -8   14.35    0.89
  -9  -4   5   -0.04    0.41
  -9   4   5    0.41    0.61
   9  -4  -5    0.15    0.33
  -9   4   5   -0.13    0.50
  11  -1  -1   68.53    1.90
 -11  -1   1   73.86    2.22
  11  -1  -1   68.41    1.86
  11   1  -1   68.58    1.73
 -11   1   1   68.19    2.06
 -11   1   1   71.80    1.73
  11   1  -1   72.61    2.08
   5   5   3    1.48    0.47
   5  -5   3    2.68    0.43
   5  -5   3    1.61    0.50
   5   5   3    1.46    0.23
   5  -5   3    0.87    0.38
  -5   5  -3    1.61    0.43
   5   5   3    1.57    0.48
  -5   5  -3    1.68    0.44
  -5  -5  -3    1.74    0.56
   5   5   3    1.65    0.32
   3  -2   7    3.99    0.56
   3   2   7    4.22    0.50
   3  -2   7    4.59    0.46
  -3  -2  -7    3.00    0.66
  -3  -2  -7    4.78    0.59
   3   2   7    4.20    0.62
  -3  -2  -7    4.59    0.59
   3   2   7    4.11    0.44
  -9  -2  -2    0.37    0.41
   9   2   2    0.89    0.43
   9  -2   2    1.34    0.45
   9  -2   2    0.41    0.36
   9   2   2    1.05    0.30
  -9   2  -2    0.74    0.44
  -9   2  -2    0.72    0.27
  -9  -2  -2    1.07    0.56
  -9  -2  -2    0.62    0.24
  -4  -2   9   12.24    0.65
  -4   2   9   12.76    0.80
   4  -2  -9   11.69    0.77
  -4   2   9   12.99    0.91
  -4   2   9   11.74    0.87
  -4  -2   9   12.59    0.67
   2  -3   7  488.55    9.14
  -2  -3  -7  525.13    9.58
   2   3   7  528.92    9.38
   2   3   7  516.78    9.78
  -2  -3  -7  527.37    9.70
  -2   3  -7  524.08    9.26
   2   3   7  525.85    9.01
   2  -3   7  525.40    9.12
  -6   5  -2   53.08    1.77
  -6  -5  -2   53.16    1.90
   6  -5   2   50.89    1.57
   6   5   2   49.24    1.69
   6  -5   2   52.63    1.65
   6   5   2   56.01    1.15
   6   5   2   49.02    1.21
   6  -5   2   48.31    1.65
   6   5   2   55.44    1.78
  -5   2   9   45.75    1.70
  -5   2   9   44.76    1.46
   5  -2  -9   43.59    1.49
  -5  -2   9   44.91    1.32
  -5  -2   9   46.96    1.33
  -5   2   9   44.60    1.71
   7  -4  -7    5.65    0.62
  -7   4   7    6.49    0.84
  -7  -4   7    6.04    0.37
  -7  -4   7    5.08    0.60
  -8  -5   3   86.96    2.41
   8  -5  -3   84.64    2.39
   8  -5  -3   83.18    2.19
  -8   5   3   88.18    2.81
  -8   5   3   90.02    2.41
   8   5  -3   86.26    1.90
 -11   2   5   88.95    2.00
 -11  -2   5   89.85    2.39
 -11  -2   5   87.15    2.19
  11  -2  -5   96.63    1.96
  11   2  -5   91.25    2.14
  11  -2  -5   91.57    2.33
  11  -2  -5   92.44    2.38
  11   2  -5   93.76    1.92
   8  -5  -2  231.27    4.20
  -8  -5   2  235.32    4.98
   8   5  -2  248.56    4.54
  -8   5   2  231.78    5.37
  -8   5   2  243.26    4.83
   8  -5  -2  236.15    4.74
   8  -5  -2  240.85    4.98
  11  -2  -2   26.63    1.15
  11  -2  -2   28.71    1.02
  11   2  -2   28.61    1.17
  11   2  -2   29.19    0.88
 -11  -2   2   28.44    1.36
 -11   2   2   28.35    1.11
   0   5   6    4.41    0.52
   0  -5  -6    5.05    0.60
   0  -5   6    4.63    0.50
   0  -5   6    4.34    0.35
   0   5  -6    5.72    0.43
   0   5   6    4.81    0.62
   0  -5  -6    5.77    0.52
  10   2  -7    0.58    0.26
  10  -2  -7    0.69    0.37
  10  -2  -7    0.76    0.34
  10   2  -7    0.93    0.26
 -10  -2   7    0.90    0.40
   9  -3  -7   23.02    1.11
   9  -3  -7   24.07    0.99
  -9  -3   7   23.42    1.09
  -9   3   7   22.96    1.40
  -9  -3   7   25.26    0.74
  -1   0   9    0.13    0.27
  -1   0   9    0.53    0.34
  -1   0   9   -0.15    0.39
  -3  -2   9   33.72    1.12
  -3  -2   9   34.82    1.17
  -3   2   9   36.66    1.41
   3  -2  -9   31.53    1.24
  -3   2   9   32.70    1.32
  -3   2   9   33.70    1.41
   4   3   6    0.02    0.27
   4   3   6    0.15    0.42
   4  -3   6    0.27    0.42
  -4   3  -6    0.19    0.13
  -4   3  -6   -0.17    0.46
  -4  -3  -6    1.03    0.52
   4   3   6   -0.13    0.40
   4  -3   6   -0.03    0.31
   1   2   8   97.24    2.73
  -1  -2  -8   93.86    2.53
   1  -2   8   93.36    2.26
   1   2   8   95.45    2.44
   1   2   8   95.59    2.25
  -1  -2  -8   96.13    2.50
   1  -2   8   96.28    2.40
  -6  -5   6    1.25    0.24
  -6  -5   6    0.68    0.43
  -6   5   6    1.26    0.61
   6  -5  -6    0.71    0.42
  -6  -2   9   21.34    0.83
  -6   2   9   22.56    1.21
  -6   2   9   21.82    1.21
   4   5   4  178.05    4.15
   4   5   4  179.43    3.54
   4  -5   4  179.87    3.68
   4  -5   4  177.18    3.82
  -4   5  -4  177.88    3.77
   4   5   4  182.89    4.01
  -4  -5  -4  186.04    4.17
  -4   5  -4  193.24    3.73
   4   5   4  178.50    3.40
   1   6   4   94.07    2.25
  -1  -6  -4   96.26    2.46
   1  -6   4   94.66    2.32
   1   6   4   95.56    2.60
  -1  -6  -4   93.29    2.22
   1  -6   4   95.00    1.97
  -1   6  -4   93.66    2.08
   1   6   4   93.35    2.25
  -5   6   4   52.53    1.78
   5  -6  -4   49.11    1.64
   5   6  -4   50.85    1.05
  -4   6  -2  103.66    2.66
  -4   6  -2  105.37    2.19
   4   6   2   98.48    2.68
  -4   6  -2  101.11    2.42
  -4  -6  -2   99.26    2.68
   4  -6   2  102.42    2.33
   4   6   2  104.30    2.14
   4  -6   2  102.14    2.56
  -4  -6  -2   96.75    2.06
   4   6   2  100.81    2.67
   8   0  -9   -0.22    0.35
  -8   0   9    0.03    0.33
  -8   0   9    0.02    0.34
   2   0   8   78.51    1.88
   2   0   8   74.50    2.28
  -2   0  -8   76.61    1.83
  -6   6   2  108.10    2.66
   6  -6  -2  105.17    2.12
  -6  -6   2   95.93    2.65
   6  -6  -2  109.43    2.49
   6  -6  -2  104.16    2.71
  -6   6   2   99.40    2.99
   6   6  -2  107.22    2.28
   8  -5  -4  170.08    3.89
   8  -5  -4  176.44    3.71
  -8  -5   4  168.88    3.87
  -8   5   4  174.88    3.98
   7   5   1  245.94    4.38
   7  -5   1  250.37    5.23
   7  -5   1  261.37    5.07
   7   5   1  259.78    5.22
   7  -5   1  252.41    5.08
   7   5   1  266.52    4.32
  -7   5  -1  270.63    5.55
  -7   5  -1  267.62    4.72
  -9  -2   8  206.33    4.03
   9  -2  -8  205.66    4.36
  -9   2   8  196.07    4.90
  -9  -2   8  215.86    3.91
  -9   2   8  210.16    4.87
  -9  -2   8  209.63    4.33
 -10   3   6   90.43    2.65
 -10  -3   6   85.56    2.33
  10  -3  -6   86.67    2.35
  10   3  -6   87.08    1.84
  10  -3  -6   82.90    2.18
   4   0   7   -0.12    0.28
  -4   0  -7    0.17    0.32
   4   0   7    0.36    0.45
   4   0   7    0.07    0.31
  -8  -5   1  106.05    2.85
   8  -5  -1  112.53    2.35
  -8   5   1  109.03    2.55
   8  -5  -1  107.43    2.79
   8  -5  -1  103.61    2.57
  -8   5   1  108.23    3.11
   8   5  -1  105.63    2.52
  -1   1   9   52.76    1.69
  -1   1   9   52.67    1.55
  -1  -1   9   50.73    1.68
  -1   1   9   48.45    1.80
  -1  -1   9   54.14    1.54
  -1  -1   9   51.50    1.54
  -5   6  -1    5.40    0.69
   5   6   1    4.70    0.65
   5  -6   1    4.58    0.48
  -5   6  -1    5.07    0.45
   5   6   1    5.16    0.59
   5  -6   1    4.41    0.57
  -5  -6  -1    4.57    0.70
   5   6   1    4.41    0.32
   3  -6   3   29.37    1.19
   3   6   3   27.02    1.26
  -3   6  -3   27.03    1.04
   3  -6   3   28.00    0.97
   3   6   3   27.23    0.97
  -3  -6  -3   28.39    1.33
  -3  -6  -3   27.54    0.92
   0   7   0    1.11    0.46
   0   7   0    0.02    0.32
   0  -7   0    0.08    0.33
   0   7   0    0.18    0.30
   6  -6  -1   43.17    1.59
   6  -6  -1   44.92    1.20
  -6  -6   1   44.50    1.62
   6   6  -1   44.17    1.36
  -6   6   1   44.56    1.82
   6  -6  -1   46.82    1.27
   6  -6  -1   45.39    1.41
  -6   6   1   42.23    1.45
  -5  -2  -6  111.88    2.59
   5   2   6   99.76    2.44
   5   2   6  107.00    2.33
   5   2   6  101.18    2.85
   5  -2   6  106.08    2.71
 -10   0   8  111.60    2.47
 -10   0   8  105.83    2.50
  10   0  -8  107.78    2.54
  10   0  -8  107.74    2.36
  -6   6   3  456.51    7.71
   6  -6  -3  372.45    6.55
   6   6  -3  400.24    6.56
   6  -6  -3  387.00    6.49
   6  -6  -3  427.89    7.60
  -6   6   3  448.81    8.22
   6  -6  -3  437.38    7.26
  -8   0  -4  317.65    5.62
  -8   0  -4  307.31    6.47
   8   0   4  315.16    5.77
   8   0   4  303.74    6.24
   9   4   0    4.32    0.55
   9   4   0    4.70    0.22
   9   4   0    4.26    0.20
  -9  -4   0    3.88    0.77
   9  -4   0    5.52    0.60
  -9   4   0    4.66    0.47
   9  -4   0    4.42    0.54
   0   3   8   31.07    1.12
   0  -3   8   31.57    1.12
   0  -3   8   32.52    1.14
   0   3   8   31.91    1.50
   0  -3  -8   32.03    1.39
   0   3   8   30.95    1.32
   0  -3  -8   33.64    1.46
   8   1  -9   45.83    1.39
  -8  -1   9   44.88    1.50
  -8   1   9   44.37    1.80
  -8   1   9   45.57    1.34
   8  -1  -9   43.05    1.46
  -2  -6   5   36.30    1.19
   2  -6  -5   39.26    1.24
   2   6  -5   36.64    1.05
  -2  -6   5   37.85    1.26
  -2  -6   5   36.94    1.48
   2  -6  -5   37.97    1.34
   2   1   8 1014.36   17.12
  -2  -1  -8 1046.11   16.62
   2   1   8 1041.93   16.56
   2  -1   8 1011.12   16.49
  -2  -1  -8 1068.50   16.80
   2  -1   8 1021.51   16.89
   2   1   8 1029.04   16.49
  -2  -2   9  346.61    6.32
  -2  -2   9  356.56    6.39
  -2   2   9  350.31    6.65
  -2   2   9  350.49    6.69
  -2  -2   9  340.35    6.22
  -3   6   5   50.31    2.01
   3  -6  -5   57.17    1.45
   3  -6  -5   53.72    1.70
   3   6  -5   52.42    1.29
  -3  -6   5   51.28    1.39
  -3  -6   5   57.51    1.88
  -3  -6   5   53.04    1.60
  -1  -7   0    1.59    0.40
  -1   7   0    2.09    0.51
   1  -7   0    1.90    0.39
   1   7   0    1.38    0.33
  -1   7   0    1.86    0.42
  -1   7   0    1.26    0.41
  -1  -7   0    0.84    0.41
   1  -7   0    1.21    0.43
   1   7   0    1.47    0.36
   1   7   0    0.95    0.50
 -11   0   7    0.05    0.40
 -11   0   7   -0.24    0.32
  11   0  -7    0.02    0.30
 -11   0   7    0.96    0.43
  11   0  -7   -0.21    0.32
   3  -4   6    1.36    0.40
   3   4   6    1.26    0.34
  -3  -4  -6    1.16    0.54
   3   4   6    1.04    0.50
   3  -4   6    1.52    0.42
  -3   4  -6    1.54    0.48
   0   7  -1  153.67    3.07
   0  -7  -1  150.50    3.21
   0   7   1  150.66    3.11
   0   7  -1  152.80    3.39
   0   7   1  154.05    3.52
   0  -7  -1  151.56    3.27
   0   7  -1  158.74    3.07
   0   7   1  151.58    3.15
   0  -7   1  148.72    3.30
   0  -7   1  154.68    3.27
  -1  -7   1  304.34    5.66
   1  -7  -1  311.09    5.70
  -1   7   1  309.69    5.62
   1   7  -1  315.25    5.48
  -1   7   1  305.94    5.65
  -1  -7   1  304.80    5.87
   1   7  -1  304.09    5.92
   1  -7  -1  310.97    5.80
  -1   7   1  295.08    5.99
   1   7  -1  301.16    5.45
   4   1   7   14.35    0.99
   4   1   7   15.74    0.76
  -4  -1  -7   16.21    0.87
   4   1   7   15.68    0.76
   4  -1   7   16.37    0.99
  -4  -1  -7   16.89    0.85
  11   0   0   81.74    2.05
 -11   0   0   84.12    1.87
 -11   0   0   80.06    2.43
 -10   2  -1  333.09    6.47
  10  -2   1  331.04    6.49
  10   2   1  324.60    6.47
 -10  -2  -1  337.53    6.78
  10   2   1  335.79    5.82
  10  -2   1  313.97    6.24
  -7   2   9    8.48    0.84
  -7   2   9    7.63    0.81
  -7  -2   9    8.83    0.70
  -7  -2   9    7.23    0.50
  11   2  -6    1.45    0.27
  11  -2  -6    1.41    0.42
  11  -2  -6    1.04    0.37
  11   2  -6    1.42    0.32
 -11  -2   6    1.45    0.45
  -8   3   8   18.81    1.26
  -8  -3   8   21.95    0.76
  -8  -3   8   21.49    1.06
  -8   3   8   19.78    1.20
  -9   0  -3    0.28    0.33
  -9   0  -3   -0.14    0.52
   9   0   3    0.07    0.35
   9   0   3   -0.12    0.43
  12   0  -4   12.27    0.74
  12   0  -4   14.08    0.76
  12   0  -4   13.08    0.82
 -12   0   4   13.11    0.68
 -12   0   4   13.61    0.91
  11  -2  -1  261.86    5.17
 -11   2   1  251.17    5.13
  11   2  -1  259.07    4.67
 -11  -2   1  255.42    5.46
  11   2  -1  260.11    5.23
  11  -2  -1  262.62    4.99
  11  -2  -1  259.76    5.31
   7   0   5   -0.04    0.41
  -7   0  -5    0.27    0.30
   7   0   5    0.53    0.30
  -7   0  -5   -0.15    0.48
  -4  -4   8  151.11    3.12
  -4  -4   8  153.74    3.03
   4  -4  -8  142.13    3.37
  -4   4   8  156.56    3.86
  -4   4   8  145.64    3.69
   1  -4   7  489.44    8.53
   1   4   7  483.64    9.09
  -1   4  -7  496.90    8.67
  -1  -4  -7  504.10    9.17
   1   4   7  505.12    9.44
   1  -4   7  480.00    8.65
  10  -3   0   60.39    1.90
  10  -3   0   61.28    1.77
  10  -3   0   57.31    1.82
 -10  -3   0   59.74    2.10
  10   3   0   57.56    1.84
   1   6  -5    2.33    0.32
  -1   6   5    2.68    0.58
   1  -6  -5    3.10    0.46
  -1  -6   5    2.32    0.51
  -1  -6   5    2.58    0.43
   1   6  -5    2.49    0.26
   1  -6  -5    3.00    0.48
  10  -1  -8   47.47    1.40
 -10  -1   8   49.13    1.53
  10   1  -8   49.59    1.31
  10   1  -8   49.77    1.43
 -10  -1   8   49.50    1.49
 -10   1   8   50.54    1.35
  10  -1  -8   51.84    1.62
  -9   4   6    7.29    0.79
   9  -4  -6    7.11    0.59
  -9   4   6    8.25    0.95
  -9  -4   6    7.04    0.70
  -4   6   5   10.01    0.84
  -4  -6   5    9.21    0.53
   4   6  -5   10.33    0.49
  -4   6   5   10.44    0.94
   4  -6  -5   10.29    0.74
  -7   4  -3  138.88    3.24
   7   4   3  137.04    2.58
   7   4   3  132.68    3.16
   7  -4   3  134.93    3.14
   7   4   3  137.22    2.70
   7  -4   3  129.90    3.12
   7   4   3  130.16    3.31
   8   1   4  281.36    5.19
  -8   1  -4  269.30    5.91
  -8  -1  -4  280.93    6.07
  -8  -1  -4  287.18    5.31
   8  -1   4  273.93    5.74
  -8   1  -4  287.37    4.95
   8   1   4  282.19    5.85
   8  -1   4  281.83    5.37
  -3   4   8  356.56    7.02
   3  -4  -8  336.47    6.52
  -3   4   8  334.87    6.87
  -3  -4   8  349.65    6.22
  12   0  -3   -0.02    0.35
  12   0  -3    0.13    0.37
 -12   0   3    0.10    0.47
 -12   0   3    0.07    0.32
  12   0  -3    0.64    0.42
   1   7   1  320.76    5.72
   1  -7   1  306.97    5.90
   1   7   1  314.64    5.96
   1  -7   1  310.35    5.97
  -1  -7  -1  311.90    5.97
   1   7   1  315.39    6.21
   1   7   1  325.44    5.72
  -1   7  -1  322.66    5.75
   1  -7   1  312.57    6.07
  -1   7  -1  312.44    5.72
  -1   7  -1  313.35    5.96
  -1  -7  -1  317.56    5.78
  -2  -7   1    1.26    0.43
  -2   7   1    0.27    0.38
  -2   7   1    0.61    0.41
  -2  -7   1    0.66    0.32
   2  -7  -1    0.40    0.32
   2   7  -1    0.69    0.28
   2   7  -1    0.37    0.47
   2   7  -1    0.76    0.29
   2  -7  -1    0.92    0.47
   5  -4  -8  285.33    5.60
  -5  -4   8  278.65    5.05
  -5   4   8  272.69    6.02
  -5   4   8  277.85    5.89
  -5  -4   8  285.66    5.75
  -5  -4   8  280.01    5.18
   3   5   5   52.28    1.38
   3   5   5   50.61    1.90
   3   5   5   54.52    1.53
  -3   5  -5   52.77    1.56
   3  -5   5   54.32    1.50
   3  -5   5   53.13    1.63
   3   5   5   54.62    1.83
  -3  -5  -5   52.36    1.86
   7   3   4   45.51    1.28
   7  -3   4   42.04    1.58
   7   3   4   46.45    1.21
   7   3   4   39.93    1.64
   7   3   4   47.35    1.53
   1   5   6  138.93    3.12
  -1  -5  -6  143.77    3.12
   1  -5   6  146.83    2.87
  -1   5  -6  146.35    2.98
   1  -5   6  139.97    3.15
  -1  -5  -6  151.53    3.50
   1   5   6  142.62    3.49
   6   4   4  169.08    3.95
  -6  -4  -4  169.10    4.09
  -6   4  -4  169.31    3.56
   6   4   4  164.78    3.71
   6   4   4  169.61    3.17
   6  -4   4  169.07    3.67
   6   4   4  168.32    3.31
   6  -4   4  158.24    3.62
  11  -1  -7    7.70    0.58
 -11   1   7    7.11    0.52
  11   1  -7    7.55    0.52
 -11  -1   7    7.97    0.62
  11   1  -7    8.55    0.54
  11  -1  -7    7.83    0.64
 -11  -1   7    7.73    0.61
  -8  -4   7  314.78    5.46
   8  -4  -7  328.37    6.32
  -8  -4   7  332.85    6.34
  -8   4   7  314.42    6.89
   8   3   3  338.64    5.76
  -8  -3  -3  326.14    6.79
   8  -3   3  322.80    6.41
   8   3   3  322.24    6.50
   8   3   3  321.53    5.79
   2   7   0  687.51   12.31
   2   7   0  702.48   11.74
  -2   7   0  705.45   12.19
  -2  -7   0  702.80   12.19
   2  -7   0  682.77   12.18
   2   7   0  706.31   11.69
  -2   7   0  720.06   11.97
  -2  -7   0  704.88   11.80
   2  -7   0  695.77   11.96
 -10   4   3  531.79    9.41
  10  -4  -3  513.70    8.47
  10   4  -3  512.78    8.94
  10  -4  -3  513.53    9.25
 -11   1   0  324.62    6.52
  11   1   0  336.01    6.54
  11  -1   0  328.98    6.23
  11   1   0  345.15    6.03
 -11  -1   0  315.78    6.63
  12   0  -5    0.15    0.35
 -12   0   5   -0.21    0.52
  12   0  -5   -0.25    0.32
 -12   0   5    0.64    0.36
  12   0  -5   -0.17    0.34
   6  -6   0  230.18    4.06
   6   6   0  234.23    4.16
   6  -6   0  225.55    4.34
   6  -6   0  233.94    3.96
  -6   6   0  233.05    4.68
  -6   6   0  235.16    4.02
   9   1   3   14.19    0.70
  -9   1  -3   13.35    0.99
   9  -1   3   13.66    0.79
  -9  -1  -3   15.85    1.10
  -9   1  -3   13.68    0.61
  -9  -1  -3   14.24    0.76
   9   1   3   13.10    0.94
   9  -1   3   14.02    0.94
  -9  -1  -3   13.13    0.64
  -7  -5   6   43.89    1.61
  -7   5   6   44.22    1.97
  -7   5   6   48.25    1.82
   7  -5  -6   46.58    1.63
 -12  -1   4   66.18    2.02
 -12   1   4   64.98    1.83
  12  -1  -4   63.10    1.92
  12   1  -4   65.57    1.67
  12   1  -4   65.13    1.88
  12  -1  -4   67.65    1.89
  12  -1  -4   68.21    1.71
  -2  -6  -4    1.33    0.35
   2  -6   4    0.11    0.26
  -2   6  -4    0.09    0.35
   2   6   4    0.25    0.45
   2  -6   4    0.39    0.39
  -2  -6  -4    0.11    0.46
   2   6   4    0.31    0.37
   8  -5  -5    3.55    0.60
  -8   5   5    4.52    0.81
  -8   5   5    4.81    0.67
   8   5  -5    2.66    0.16
  -8  -5   5    3.42    0.62
   8  -5  -5    3.44    0.47
   7   1   5   53.91    1.91
   7   1   5   54.28    1.51
  -7   1  -5   58.16    1.28
   7  -1   5   56.62    1.91
  -7  -1  -5   56.71    2.10
  -7  -1  -5   56.15    1.59
   7  -1   5   53.55    1.59
   0   0   9    0.02    0.29
   0   0   9   -0.16    0.33
   0   0   9    0.39    0.44
 -10  -4   4  674.29   11.89
  10   4  -4  670.16   11.24
  10  -4  -4  657.71   11.62
 -10   4   4  656.45   11.92
  11   3  -4  365.17    6.07
  11   3  -4  386.82    6.72
  11  -3  -4  360.11    7.03
 -11  -3   4  345.50    7.01
  11  -3  -4  382.25    6.27
   3  -5  -7    1.01    0.37
  -3   5   7   -0.05    0.48
  -3  -5   7    0.10    0.25
   3   5  -7    0.34    0.30
  -3   5   7    0.69    0.50
   3  -5  -7    0.07    0.36
 -11  -3   3   24.63    1.30
 -11  -3   3   27.99    1.14
  11   3  -3   26.31    0.62
  11   3  -3   28.66    1.10
  11  -3  -3   27.55    1.26
  11  -3  -3   27.99    0.87
  11  -3  -3   27.57    1.19
  -1  -7   2  150.46    3.41
  -1   7   2  154.14    3.60
  -1   7   2  155.55    3.27
   1   7  -2  155.38    3.03
   1   7  -2  156.79    3.40
   1  -7  -2  151.80    3.33
  -1  -7   2  154.91    3.24
   1  -7  -2  152.53    3.22
   1   7  -2  163.37    3.05
  -4   5   7  457.41    8.83
   4  -5  -7  465.56    8.47
  -4  -5   7  464.02    8.70
   4   5  -7  468.63    7.92
  -4  -5   7  455.66    7.95
  -4  -5   7  455.08    8.15
  -4   5   7  467.17    9.08
   6  -6  -4   40.15    1.52
  -6   6   4   43.07    1.63
   6  -6  -4   42.07    1.34
   8   4   2   86.04    2.45
  -8  -4  -2   86.15    2.65
   8  -4   2   86.27    2.40
   8   4   2   91.20    1.86
  -8   4  -2   89.04    1.74
   8  -4   2   86.10    2.37
   8   4   2   90.73    1.78
   8  -5   0   37.49    1.35
  -8   5   0   37.88    1.19
   8  -5   0   32.90    1.39
  -8   5   0   39.14    1.69
   8  -5   0   36.74    1.26
   8   5   0   36.86    1.35
  12   1  -3   18.70    0.81
 -12  -1   3   18.01    1.10
  12   1  -3   17.05    0.93
  12  -1  -3   17.26    0.82
 -12   1   3   15.16    0.89
  12  -1  -3   16.80    0.92
  12  -1  -3   17.67    1.00
  -2  -4   8   12.17    0.65
  -2   4   8   12.83    0.94
   2  -4  -8   12.46    0.79
   0   7  -2   30.67    0.99
   0   7   2   29.10    1.07
   0   7   2   31.16    1.15
   0  -7   2   31.13    1.25
   0  -7   2   29.48    1.20
   0  -7   2   26.75    1.09
   0   7   2   30.39    1.34
   0   7  -2   29.10    1.16
   0  -7  -2   29.97    1.12
   0   7  -2   30.12    0.99
  -2  -7   2   68.14    2.00
   2  -7  -2   68.78    1.75
  -2  -7   2   68.17    1.75
  -2   7   2   67.38    2.08
   2   7  -2   70.83    1.58
   2   7  -2   71.11    1.58
   2  -7  -2   70.90    1.97
 -10  -4   2    2.98    0.50
 -10  -4   2    2.27    0.62
  10  -4  -2    1.86    0.42
  10   4  -2    2.06    0.45
  10  -4  -2    1.76    0.45
 -10   4   2    1.83    0.47
   6  -3   5  561.76    9.90
   6  -3   5  537.32    9.71
   6   3   5  563.10    9.78
   6   3   5  538.87    9.43
   6   3   5  545.69    9.31
  10   0   2  428.76    8.25
 -10   0  -2  426.00    8.40
 -10   0  -2  445.36    7.66
  10   0   2  432.70    7.75
  -9   0   9    0.19    0.33
  -9   0   9    0.02    0.34
   9   0  -9    0.12    0.33
   0  -6   5    1.00    0.39
   0   6   5    0.89    0.50
   0   6  -5    1.37    0.29
   0  -6  -5    1.41    0.39
   0  -6  -5    1.13    0.45
  -6  -4   8   13.41    0.94
  -6   4   8   13.30    1.06
  -6   4   8   14.40    1.05
   6  -4  -8   13.59    0.87
  -6  -4   8   14.71    0.63
  12   1  -5   42.94    1.41
 -12  -1   5   42.21    1.49
 -12   1   5   40.55    1.36
  12  -1  -5   42.68    1.26
  12   1  -5   42.71    1.26
  12  -1  -5   44.45    1.49
  12  -1  -5   42.73    1.44
  -1   2   9  542.66    9.75
  -1  -2   9  523.70    9.45
  -1  -2   9  555.15    9.33
   1  -2  -9  540.41    9.75
  -1  -2   9  518.43    9.30
  -1   2   9  518.81   10.05
  -2  -5   7    4.46    0.45
  -2   5   7    3.15    0.60
   2  -5  -7    4.12    0.52
   2  -5  -7    2.98    0.48
   5   6  -5  111.68    1.97
  -5   6   5  113.24    2.90
  -5   6   5  107.78    3.17
   5  -6  -5  107.22    2.64
  -6   0  -6  603.18   10.12
   6   0   6  582.30   10.26
   6   0   6  593.12   10.86
  -6   0  -6  604.09   11.11
   0   1   9    1.54    0.44
   0  -1   9    1.40    0.36
   0  -1   9    1.18    0.43
   0   1   9    1.05    0.51
   0  -1  -9    1.16    0.47
   0  -1   9    0.97    0.34
   3  -3   7   51.86    1.63
   3  -3   7   50.24    1.56
   3   3   7   51.36    1.69
  -3   3  -7   53.19    1.73
   3   3   7   50.47    1.92
  -3  -3  -7   51.64    1.96
   3   3   7   54.62    1.49
  -5   5   7  223.10    5.18
   5  -5  -7  212.52    4.55
  -5   5   7  211.16    4.85
  -5  -5   7  217.55    4.02
  -5  -5   7  227.88    4.82
  12   0  -2   23.77    1.01
  12   0  -2   23.25    1.14
 -12   0   2   24.22    1.21
 -12   0   2   23.15    0.84
   9  -3   2  311.52    6.17
   9   3   2  328.37    5.60
  -9  -3  -2  315.89    6.66
   9   3   2  319.78    6.40
   9   3   2  317.24    5.60
   9  -3   2  320.83    6.32
   2  -7   1   83.82    2.25
  -2  -7  -1   88.30    1.99
  -2   7  -1   89.57    2.09
  -2   7  -1   86.35    2.18
   2   7   1   88.06    1.95
   2  -7   1   85.01    2.25
   2  -7   1   81.17    2.12
   2   7   1   85.69    2.40
   2  -7   1   82.43    1.91
  -2  -7  -1   82.70    2.23
   2   7   1   85.38    1.96
  -4  -3   9   48.82    1.37
   4  -3  -9   47.50    1.61
  -4   3   9   52.00    1.88
  -4   3   9   48.75    1.84
   5   4   5   27.36    1.37
  -5  -4  -5   33.27    1.56
   5   4   5   29.68    0.96
   5  -4   5   31.60    1.24
   5  -4   5   31.33    1.26
   5   4   5   32.11    1.34
   5   4   5   32.29    1.09
   3   7  -1    1.40    0.49
  -3  -7   1    0.71    0.42
   3   7  -1    1.35    0.30
   3  -7  -1    1.16    0.33
   3  -7  -1    0.64    0.49
  -3   7   1    1.38    0.45
   3   7  -1    0.90    0.27
   5  -3  -9    5.51    0.59
  -5   3   9    5.37    0.72
  -5  -3   9    6.14    0.47
  -5   3   9    5.77    0.72
   8  -2  -9  306.05    5.96
  -8  -2   9  305.38    5.52
  -8  -2   9  311.86    6.04
  -8   2   9  309.41    6.51
  -8  -2   9  304.95    5.69
  -8   2   9  290.40    6.36
  11   3  -5   22.84    0.89
 -11  -3   5   22.59    1.16
  11  -3  -5   21.51    1.08
  -2  -2  -8   38.16    1.44
   2  -2   8   35.64    1.36
  -2  -2  -8   36.41    1.41
   2   2   8   36.34    1.20
   2   2   8   32.87    1.50
   2   2   8   34.96    1.31
   2  -2   8   33.70    1.22
 -11   3   2   25.55    1.02
  11  -3  -2   25.53    1.21
  11   3  -2   27.20    0.68
  11  -3  -2   24.77    1.19
 -11  -3   2   26.04    1.39
  11   3  -2   26.45    1.14
 -10  -1  -2  169.73    3.54
 -10  -1  -2  176.83    3.30
  10  -1   2  168.56    3.60
  10   1   2  165.12    3.42
  10  -1   2  170.60    3.97
 -10  -1  -2  174.49    4.22
 -10   1  -2  167.38    4.04
 -10   1  -2  173.69    3.33
  -9   1   9  262.92    4.91
  -9  -1   9  269.31    5.20
   9   1  -9  262.52    5.01
   9  -1  -9  256.65    5.18
   3   7   0  308.75    5.32
   3  -7   0  291.71    5.57
   3  -7   0  305.90    5.53
   3  -7   0  314.84    5.94
   3   7   0  297.49    5.40
   3   7   0  299.54    6.02
  -3   7   0  309.01    5.85
  -3   7   0  314.23    5.73
  -3  -7   0  301.73    5.93
   3  -7   0  300.84    5.94
   4  -2   7  130.62    3.13
   4   2   7  120.14    3.29
   4   2   7  131.43    2.77
  -4  -2  -7  125.65    2.98
  -4  -2  -7  126.76    3.44
   4   2   7  128.05    2.90
  -4  -2  -7  135.06    3.11
   4  -2   7  122.14    2.84
 -10   4   5  316.06    6.49
 -10   4   5  298.30    6.98
 -10  -4   5  318.88    6.31
  10  -4  -5  308.84    6.11
  10   4  -5  334.44    5.65
   6   5   3    9.03    0.82
   6   5   3    8.91    0.78
   6   5   3    8.93    0.43
  -6  -5  -3    9.16    0.92
   6   5   3    9.26    0.52
   6  -5   3   10.07    0.72
  -6   5  -3    9.44    0.73
   1  -7   2    7.47    0.64
  -1   7  -2    8.45    0.66
   1   7   2    7.09    0.76
   1  -7   2    7.83    0.84
   1  -7   2    7.87    0.69
  -1  -7  -2    6.81    0.67
   1  -7   2    7.02    0.62
   1   7   2    7.54    0.57
  -1   7  -2    8.23    0.57
  -1  -7  -2    7.13    0.56
   1   7   2    7.75    0.66
  10  -3  -7   38.16    1.45
  10   3  -7   39.18    0.97
 -10   3   7   36.78    1.85
  10  -3  -7   36.36    1.29
 -10   3   7   34.67    1.62
 -10  -3   7   36.46    1.43
  -3   7   2   62.49    1.98
   3   7  -2   66.38    1.43
   3  -7  -2   67.21    1.63
   3  -7  -2   60.24    1.88
  -3   7   2   60.92    2.23
   3   7  -2   62.69    1.43
  -3  -7   2   62.49    1.96
  -5   6  -2  230.41    4.96
   5   6   2  245.18    4.13
   5  -6   2  228.77    4.55
   5  -6   2  223.71    4.84
  -5   6  -2  236.26    4.29
   5   6   2  231.89    4.94
  -5  -6  -2  234.24    5.05
   5   6   2  227.04    4.95
   5   6   2  238.13    4.26
   3  -3  -9   14.62    0.88
  -3   3   9   12.85    0.95
  -3  -3   9   14.32    0.73
  -3   3   9   13.22    0.96
  12   0  -6   51.72    1.54
  12   0  -6   52.06    1.51
 -12   0   6   52.76    1.51
  12   0  -6   51.86    1.55
   1  -3   8   64.56    1.83
   1   3   8   61.65    2.21
   1   3   8   67.56    1.78
   1   3   8   68.72    2.06
  -1  -3  -8   61.96    2.12
  -1  -3  -8   66.57    2.13
   1  -3   8   66.33    1.81
   6   1   6   73.38    2.30
   6   1   6   74.53    1.87
   6  -1   6   74.61    1.94
  -6  -1  -6   73.57    1.92
   6   1   6   72.62    1.80
  -6  -1  -6   69.79    2.41
   6  -1   6   71.33    2.22
  -7   6   2  713.28   12.31
   7  -6  -2  715.43   12.12
   7  -6  -2  698.39   12.44
   7   6  -2  719.22   11.82
   7  -6  -2  674.89   11.56
  -7   6   2  702.87   12.94
 -12   1   2   98.85    2.60
  12   1  -2   96.27    2.58
  12  -1  -2   98.54    2.65
  12   1  -2   99.40    2.28
 -12  -1   2   98.34    2.72
  12  -1  -2   98.79    2.48
  12  -1  -2  101.29    2.39
  -6   3   9   56.88    2.04
  -6   3   9   56.65    2.04
  -6  -3   9   53.57    1.44
   6  -3  -9   55.56    1.78
   4  -6   3   55.47    1.46
   4   6   3   49.92    1.79
  -4   6  -3   55.36    1.67
   4   6   3   54.27    1.37
  -4   6  -3   55.77    1.57
  -4  -6  -3   55.48    1.89
  -4  -6  -3   54.34    1.29
   4  -6   3   57.18    1.72
   4   6   3   52.63    1.81
   9   5  -3  512.70    7.71
  -9   5   3  515.50    9.13
   9  -5  -3  504.52    8.45
   9  -5  -3  498.28    8.10
  -9   5   3  528.22    8.38
  -9  -5   3  510.11    8.48
  -5   0  10  745.00   12.77
  -5   0  10  721.69   13.21
  -5   0  10  760.00   12.52
  -5   0  10  745.94   12.88
 -10  -2   8  193.57    4.10
  10   2  -8  196.20    3.77
  10  -2  -8  189.93    4.15
  10  -2  -8  189.48    3.91
  10   2  -8  200.44    3.59
  -8  -2  -4   12.20    1.04
  -8  -2  -4   12.23    0.62
   8  -2   4   13.03    0.90
   8   2   4   13.30    0.65
   8  -2   4   11.80    0.78
  -8  -2  -4   13.92    0.84
   7  -5   2  101.58    2.30
   7  -5   2  108.78    2.43
   7   5   2  107.31    1.74
  -7  -5  -2  102.63    2.70
   7  -5   2  102.72    2.43
   7   5   2  111.53    2.56
  -7   5  -2  106.70    2.61
   7  -6  -3  335.84    5.62
   7  -6  -3  342.70    5.25
  -7   6   3  343.64    6.26
  -7   6   3  340.43    5.57
   5  -5   4   24.30    1.04
   5   5   4   24.08    1.26
  -5   5  -4   25.49    1.03
  -5  -5  -4   24.36    1.32
   5  -5   4   22.80    1.07
   5   5   4   22.74    1.18
   5   5   4   23.31    0.78
   5   5   4   23.56    0.89
  -4   0  10 2010.13   33.17
  -4   0  10 2077.65   33.66
  -1  -5   7    7.77    0.59
   1  -5  -7    8.55    0.72
   1  -5  -7    7.63    0.64
  -1   5   7    7.64    0.78
  -1   4   8  163.46    3.88
  -1  -4   8  163.65    3.39
   1  -4  -8  161.72    3.71
   1  -4  -8  165.18    3.60
  -1   4   8  159.85    3.54
   9   4   1  290.84    4.98
   9  -4   1  300.66    5.69
   9   4   1  294.03    5.85
  -9  -4  -1  288.77    6.17
   9  -4   1  298.59    5.85
  -9   4  -1  288.36    5.23
  -9   5   2   48.62    2.05
   9  -5  -2   47.30    1.77
   9  -5  -2   46.49    1.22
  -9   5   2   47.86    1.61
   9   5  -2   48.75    1.46
   9  -5  -2   49.97    1.64
  11   2  -7    0.20    0.25
  11  -2  -7    0.14    0.39
 -11  -2   7    0.13    0.38
  11  -2  -7    0.12    0.34
  11   2  -7    0.23    0.26
  -9  -3   8    1.12    0.45
  -9   3   8    0.77    0.63
   9  -3  -8    0.98    0.44
  -9   3   8    0.96    0.53
  -9  -3   8    0.86    0.24
  -6   0  10   90.54    2.69
  -6   0  10   88.89    2.23
  -6   0  10   93.72    2.11
  -6   0  10   90.94    2.46
   3   0   8   30.28    1.40
  -3   0  -8   33.15    1.09
  10  -4  -1   55.88    1.81
  10  -4  -1   57.39    1.59
 -10   4   1   58.90    1.71
  10   4  -1   55.14    1.73
 -10  -4   1   52.96    2.03
  11  -2   0   32.39    1.34
  11  -2   0   32.40    1.29
 -11  -2   0   31.85    1.52
  11   2   0   32.99    1.02
  11  -2   0   33.27    1.40
 -11   2   0   33.31    1.36
  11   2   0   31.15    1.36
  -6   5   7  231.06    5.52
  -6  -5   7  245.37    5.14
  -6  -5   7  241.39    4.33
   6  -5  -7  237.91    4.98
  -9  -2  -3  356.55    6.69
  -9   2  -3  359.74    6.07
   9  -2   3  359.35    7.00
   9  -2   3  356.49    6.73
  -9  -2  -3  352.74    7.41
   9   2   3  363.33    6.37
  -6   6  -1   11.75    0.63
   6  -6   1   11.20    0.74
   6  -6   1   11.44    0.73
  -6  -6  -1   11.00    0.95
   6  -6   1   11.29    0.83
   6   6   1   10.11    0.85
  -6   6  -1   11.56    0.91
   6   6   1   11.68    0.81
   6   6   1   11.66    0.44
  12   1  -6  127.71    2.74
 -12  -1   6  128.15    2.94
  12   1  -6  127.34    2.84
  12  -1  -6  133.95    2.73
 -12  -1   6  128.75    2.97
  12  -1  -6  127.29    2.98
 -12   1   6  127.17    2.81
  12  -1  -6  131.79    2.99
  -1  -7   3    6.88    0.57
  -1  -7   3    7.49    0.67
   1  -7  -3    7.70    0.67
  -1  -7   3    6.80    0.75
   1   7  -3    7.64    0.47
  -1   7   3    7.81    0.73
   1   7  -3    7.48    0.48
   1  -7  -3    8.07    0.64
  -1  -7   3    7.74    0.68
   9   5  -4  387.63    6.53
  -9  -5   4  382.43    7.32
   9  -5  -4  358.73    7.30
   9  -5  -4  370.32    7.07
  -9   5   4  381.32    7.35
  -7  -4   8  150.40    3.59
  -7  -4   8  141.79    2.79
  -7   4   8  144.76    3.85
   7  -4  -8  142.58    3.39
  -7   4   8  142.55    3.69
  -2  -7   3   35.00    1.17
  -2   7   3   37.36    1.51
   2  -7  -3   36.75    1.21
   2  -7  -3   35.32    1.32
   2   7  -3   37.67    1.04
  -2  -7   3   36.00    1.40
   2   7  -3   37.42    0.97
  12  -2  -4   43.55    1.56
  12  -2  -4   46.15    1.61
 -12  -2   4   44.50    1.68
  12   2  -4   47.03    1.19
  12   2  -4   46.19    1.49
  12  -2  -4   44.88    1.25
   7  -6  -1    1.20    0.28
  -7   6   1    1.10    0.57
   7  -6  -1    1.07    0.50
   7  -6  -1    1.71    0.45
  -7   6   1    1.65    0.42
   7  -6  -1    1.73    0.39
   7   6  -1    1.20    0.40
   7   2   5  231.17    4.29
  -7  -2  -5  227.22    4.54
   7  -2   5  219.14    4.51
  -7  -2  -5  218.66    5.18
   7  -2   5  226.83    4.83
   7   2   5  215.16    4.90
  -5  -3  -6    0.77    0.55
   5   3   6    0.44    0.27
   5   3   6    0.40    0.48
   5  -3   6    0.24    0.38
   5   3   6    0.47    0.48
   5  -3   6    0.24    0.44
  -5   1  10  782.39   13.65
  -5  -1  10  782.50   13.58
  -5   1  10  769.19   13.34
  -5  -1  10  763.28   12.95
   2   4   7 1300.01   22.42
  -2  -4  -7 1320.98   22.68
   2  -4   7 1314.30   22.07
   2   4   7 1275.85   22.79
  -2   4  -7 1332.37   22.09
   2  -4   7 1332.82   21.98
   2   5   6   72.89    2.24
  -2   5  -6   71.80    1.88
   2  -5   6   72.42    1.81
   2  -5   6   72.99    1.98
  -2  -5  -6   74.20    1.90
  -2  -5  -6   71.82    2.27
   1   6   5    0.47    0.49
  -1   6  -5    0.39    0.31
   1  -6   5    0.12    0.40
   1   6   5    0.29    0.40
  -1  -6  -5    0.07    0.45
  -1  -6  -5    0.28    0.31
  12  -2  -3  268.22    5.51
 -12   2   3  272.88    5.28
 -12  -2   3  279.95    5.75
  12   2  -3  275.15    5.43
  12   2  -3  280.21    4.92
  12  -2  -3  276.20    5.08
  -2  -3   9  772.89   13.03
  -2   3   9  772.13   13.64
   2  -3  -9  778.29   13.35
  -2   3   9  752.81   13.33
  -4   1  10    0.24    0.44
  -4  -1  10    0.40    0.35
  -4  -1  10    0.61    0.49
  -4   1  10    0.08    0.50
  -4  -1  10    0.13    0.45
  -4   1  10    0.20    0.40
   6  -6  -5   13.99    0.90
  -6   6   5   11.29    1.07
  -6   6   5   13.65    0.96
  -3   7  -1  135.07    2.95
   3   7   1  134.27    2.68
   3  -7   1  129.84    2.78
  -3   7  -1  130.91    2.96
   3  -7   1  128.62    3.14
   3  -7   1  131.29    2.97
   3   7   1  131.12    2.74
  -3   0  10  480.96    8.64
  -3   0  10  487.90    9.04
  -3   0  10  490.50    8.94
  -4   7   1  214.85    4.90
   4  -7  -1  216.90    4.15
  -4  -7   1  210.59    4.51
   4  -7  -1  212.03    4.53
   4   7  -1  201.52    3.86
   4  -7  -1  212.01    4.03
   4   7  -1  212.44    3.72
  -4   7   1  212.18    4.43
   4   7  -1  224.32    4.26
 -11   0   8    0.44    0.35
  11   0  -8    0.05    0.30
  11   0  -8    0.11    0.35
  -6   1  10   10.55    0.92
   6  -1 -10    8.74    0.71
  -6  -1  10    8.64    0.61
  -6   1  10   11.53    0.88
  -3  -6  -4  341.96    6.79
   3   6   4  338.07    6.20
   3  -6   4  356.01    6.19
   3   6   4  336.74    6.76
  -3  -6  -4  342.24    6.14
   3   6   4  340.36    6.91
  -3   6  -4  344.72    6.30
   3  -6   4  335.45    6.49
  -8  -5   6  377.08    7.14
   8  -5  -6  368.59    6.82
   8  -5  -6  365.56    7.08
  -8   5   6  366.30    7.33
  -8   5   6  352.31    7.68
  -3  -1  -8  110.98    2.63
  -3  -1  -8  111.23    2.63
   3   1   8  105.98    2.95
   3   1   8  108.69    2.49
   3   1   8  105.54    2.48
   3  -1   8  107.40    2.83
   0  -7   3    0.41    0.40
   0   7   3    0.41    0.42
   0   7  -3    0.47    0.30
   0  -7  -3    0.27    0.52
   0  -7   3    0.10    0.42
   0  -7  -3    0.76    0.36
   0   7   3    0.45    0.47
  -3  -7   3    0.98    0.43
   3   7  -3    1.46    0.25
   3   7  -3    1.43    0.28
  -3   7   3    0.73    0.47
   3  -7  -3    1.29    0.39
   3  -7  -3    1.80    0.46
  10  -3   1  158.13    3.66
  10   3   1  158.39    2.96
 -10   3  -1  156.33    3.21
 -10  -3  -1  157.90    3.97
  10  -3   1  156.71    3.56
  10  -3   1  151.91    3.55
  10   3   1  153.63    3.65
  12   2  -5    0.32    0.36
  12   2  -5    0.20    0.23
  12  -2  -5    0.23    0.31
 -12  -2   5    0.13    0.46
  12  -2  -5    0.17    0.42
  12  -2  -5    0.07    0.39
   2  -7   2  341.05    6.46
  -2  -7  -2  339.74    6.10
   2  -7   2  345.93    6.01
  -2  -7  -2  340.97    6.54
  -2   7  -2  341.09    6.17
  -2   7  -2  339.98    6.25
   2  -7   2  325.94    6.77
   2   7   2  344.57    6.09
   2  -7   2  325.08    6.41
  -7  -3   9  191.66    3.74
  -7   3   9  185.51    4.47
  -7  -3   9  182.97    3.56
  -7   3   9  186.63    4.41
  -7  -3   9  189.94    4.18
  -9   4   7   95.48    3.12
  -9   4   7  100.45    2.92
  -9  -4   7   94.57    2.58
 -11   0  -1    0.29    0.46
 -11   0  -1   -0.32    0.48
  11   0   1    0.08    0.38
  11  -3  -6    2.62    0.47
  11   3  -6    3.19    0.37
 -11  -3   6    3.42    0.56
  11  -3  -6    2.78    0.54
 -11   3   6    3.10    0.64
  -4   7   2  414.31    8.33
   4  -7  -2  419.73    7.20
   4   7  -2  428.50    6.96
  -4   7   2  420.88    7.85
   4   7  -2  433.95    7.33
   4  -7  -2  408.56    7.79
  -4  -7   2  404.38    7.79
   4   7  -2  395.70    7.02
   4   4   6  207.30    3.90
   4  -4   6  196.52    4.16
   4  -4   6  204.23    4.16
   4   4   6  196.00    4.33
  -4  -4  -6  198.64    4.66
   7   0 -10  111.98    2.67
  -7   0  10  103.01    2.88
 -11  -3   1   26.09    1.46
  11   3  -1   28.06    1.22
  11  -3  -1   27.03    1.27
  11  -3  -1   25.36    1.20
  11  -3  -1   27.57    1.14
   7   6  -4  340.41    5.38
   7  -6  -4  384.77    6.22
  -7   6   4  390.53    6.68
   7  -6  -4  382.66    6.59
  -7  -6   4  355.62    6.53
  12   0  -1    0.02    0.39
 -12   0   1    0.25    0.54
  12   0  -1    0.27    0.44
   0   2   9   65.97    2.27
   0   2   9   64.89    1.81
   0  -2  -9   69.56    2.10
   0   2   9   68.21    2.03
   0  -2   9   68.19    1.94
   0  -2   9   66.50    1.82
  -1   0  -9    0.25    0.33
   1   0   9    1.08    0.52
   1   0   9   -0.08    0.32
   1   0   9    0.18    0.32
  -3  -6   6  140.00    2.93
   3  -6  -6  145.95    2.98
   3  -6  -6  139.92    3.27
  -3   6   6  136.71    3.54
  -3   6   6  140.48    3.80
   3   6  -6  143.72    2.83
   8   5   1   11.44    0.40
   8   5   1   10.84    0.81
   8  -5   1   12.61    0.82
  -8   5  -1   12.99    0.61
   8  -5   1   11.76    0.80
  -8   5  -1   12.82    0.98
   8   5   1   11.08    0.35
   8  -5   1   10.96    0.85
   5   0   7    0.17    0.45
   5   0   7    0.53    0.33
  -5   0  -7    0.06    0.32
   9  -5  -1  104.59    2.86
   9  -5  -1  109.33    2.71
  -9  -5   1  102.50    2.98
   9  -5  -1  112.17    2.42
   9   5  -1  111.11    2.64
  -9   5   1  110.47    2.59
  -9   5   1  111.15    3.23
  -4  -5  -5   92.40    2.69
   4   5   5   95.01    2.03
   4  -5   5   88.10    2.21
  -4   5  -5   88.83    2.28
   4   5   5   87.64    2.14
   4   5   5   88.44    2.65
   4  -5   5   87.18    2.33
   4   5   5   85.29    2.48
   2  -6  -6  625.74   11.05
   2  -6  -6  643.19   10.88
  -2  -6   6  613.10   10.72
  -2  -6   6  624.08   11.34
  -2   6   6  628.04   11.47
   4  -7   0  181.84    3.72
   4   7   0  182.56    3.53
  -4   7   0  191.69    3.94
   4   7   0  191.50    3.39
  -4  -7   0  184.01    4.10
   4   7   0  187.25    3.96
   4  -7   0  185.97    4.11
   4   7   0  181.80    4.14
   4  -7   0  192.22    3.76
  -4   7   0  191.99    4.44
   4  -6  -6  106.56    2.73
   4   6  -6  108.64    2.23
  -4  -6   6  108.65    2.32
  -4   6   6  107.17    3.21
  -3   1  10  211.37    4.55
  -3  -1  10  207.16    4.38
  -3   1  10  205.68    4.21
  -3  -1  10  202.55    4.16
  -3  -1  10  213.21    4.42
 -11  -1   8  402.58    7.15
  11  -1  -8  385.54    6.96
  11   1  -8  379.85    6.77
  11  -1  -8  377.80    7.16
  11   1  -8  380.30    6.89
 -10  -4   6  291.33    5.88
 -10   4   6  290.22    6.15
 -10   4   6  300.61    6.65
 -10   2  -2   15.93    1.05
  10  -2   2   15.89    0.92
  10   2   2   17.09    1.06
 -10  -2  -2   17.16    1.21
  10  -2   2   17.42    1.05
  10   2   2   16.70    0.73
 -10   2  -2   17.85    0.69
  -9   2   9    1.55    0.58
  -9  -2   9    2.36    0.51
   9  -2  -9    2.67    0.50
  -9   2   9    2.39    0.65
  -9  -2   9    2.52    0.36
 -11   1  -1   14.49    1.02
 -11   1  -1   15.25    0.75
 -11  -1  -1   14.19    1.10
  11  -1   1   15.26    0.87
  11   1   1   17.25    0.79
  11   1   1   14.21    0.98
  11  -1   1   15.89    1.01
   0  -5  -7   64.21    1.83
   0   5   7   62.21    2.10
   0  -5  -7   64.04    2.00
   0  -5   7   58.83    1.72
   0   5  -7   64.92    1.61
 -10   0   9   -0.07    0.35
  10   0  -9    0.32    0.35
  -9   5   5 1761.21   29.64
   9  -5  -5 1779.18   29.47
   9  -5  -5 1787.74   29.19
  -9  -5   5 1767.65   29.49
  -7   1  10  194.01    4.61
  -7  -1  10  204.80    4.40
   7  -1 -10  194.88    4.24
  -7   1  10  207.73    4.63
  -7  -1  10  203.98    4.02
  -6  -2  -6  217.90    4.38
   6   2   6  207.58    4.80
   6  -2   6  213.58    4.63
   6   2   6  213.58    4.27
   6   2   6  212.88    4.12
  12   1  -1   56.35    1.56
  12   1  -1   55.08    1.88
  12  -1  -1   56.36    1.74
 -12  -1   1   60.74    2.08
 -12   1   1   59.27    1.94
   1  -1   9    4.82    0.65
   1  -1   9    4.15    0.50
   1   1   9    3.30    0.65
  -1  -1  -9    4.19    0.58
   1   1   9    3.22    0.50
  12  -2  -2  101.11    2.33
  12  -2  -2   98.62    2.57
  12   2  -2  101.25    2.15
  12   2  -2   98.19    2.56
 -12   2   2   92.70    2.48
 -12  -2   2   98.26    2.81
   7  -6   0  588.60   10.24
   7  -6   0  572.18   10.06
  -7   6   0  583.32   10.06
   7  -6   0  567.14   10.50
  -7   6   0  580.32   10.86
  -7  -6   0  562.95   10.60
   7   6   0  597.37   10.29
  12   0  -7   -0.05    0.33
  12   0  -7    0.21    0.32
 -12   0   7   -0.02    0.37
   5  -1   7    5.27    0.53
   5   1   7    5.43    0.49
   5   1   7    5.26    0.71
   5  -1   7    4.93    0.68
  -5  -1  -7    5.38    0.59
   5   1   7    5.99    0.56
   7  -5  -7    5.49    0.64
  -7  -5   7    5.75    0.70
  -7   5   7    6.76    0.89
  -1  -7  -3  176.56    3.87
   1   7   3  178.60    3.61
  -1  -7  -3  177.70    3.61
  -1   7  -3  178.68    3.48
   1  -7   3  169.19    3.74
   1  -7   3  178.41    3.91
   0  -4  -8    7.91    0.65
   0  -4  -8    7.82    0.78
   0   4   8    7.97    0.80
   0  -4   8    7.60    0.59
   4  -7  -3  414.46    7.94
  -4   7   3  437.44    8.63
  -4   7   3  424.41    8.12
   4   7  -3  430.14    7.14
  -4  -7   3  426.80    8.05
   4  -7  -3  434.47    7.34
   4   7  -3  421.90    7.11
  -2   0  10   15.05    0.82
  -2   0  10   14.61    0.89
  -2   0  10   15.69    0.99
  -1   6   6  271.15    5.78
   1  -6  -6  288.31    5.45
  -1  -6   6  275.77    5.21
   1   6  -6  269.13    4.75
   1  -6  -6  273.86    5.37
  -1   3   9   58.94    2.01
  -1  -3   9   64.27    1.73
  -1  -3   9   62.90    1.73
  -1   3   9   64.03    1.81
  -8  -4   8    5.10    0.37
  -8   4   8    4.77    0.84
   8  -4  -8    5.43    0.62
  -8  -4   8    5.52    0.67
  -8   4   8    5.26    0.81
  -5   6   6  264.26    5.96
   5  -6  -6  255.66    5.25
   5   6  -6  261.51    4.56
  12  -2  -6  106.30    2.60
  12  -2  -6   97.00    2.62
  12   2  -6  104.53    2.38
  12   2  -6  104.07    2.18
 -12  -2   6  107.08    2.68
  10   1  -9    0.13    0.32
 -10  -1   9    0.03    0.40
  10  -1  -9   -0.07    0.41
  -8   0  10  435.31    8.30
  -8   0  10  421.92    7.74
   8   0 -10  423.77    7.79
  10  -4   0    8.15    0.77
  10   4   0    8.81    0.32
  10   4   0    8.77    0.34
 -10  -4   0    9.34    1.04
  10   4   0    7.68    0.73
 -10   4   0    9.70    0.64
  10  -4   0    9.64    0.76
  10  -4   0    8.85    0.77
  -5  -2  10    0.67    0.34
   5  -2 -10    0.07    0.40
  -5   2  10    1.59    0.53
  -5   2  10    1.06    0.57
  12   1  -7   84.79    2.06
  12   1  -7   84.31    2.06
  12  -1  -7   85.60    2.27
  12  -1  -7   85.19    2.18
 -12  -1   7   86.02    2.24
  -8   3   9   27.09    1.46
  -8  -3   9   27.03    0.92
  -8   3   9   27.45    1.52
  -8  -3   9   26.15    1.29
   2  -3   8  261.88    5.14
   2   3   8  258.35    5.35
  -2  -3  -8  266.69    5.73
   2  -3   8  276.25    5.25
   2   3   8  261.71    5.03
   2   3   8  264.67    5.78
  -2  -6  -5  170.27    3.93
  -2  -6  -5  174.49    3.51
   2   6   5  168.98    4.01
   2   6   5  169.97    3.55
  -2   6  -5  170.30    3.47
   2  -6   5  169.49    3.68
   4  -2 -10 1056.54   17.56
  -4   2  10 1077.15   17.73
  -4   2  10 1041.54   17.88
   7   4   4  153.25    3.76
   7   4   4  155.88    3.12
   7  -4   4  151.84    3.53
  -7   4  -4  156.03    3.47
   7   4   4  149.65    3.50
   7  -4   4  146.78    3.47
   7   4   4  157.60    2.97
  -2  -7   4   47.97    1.44
   2  -7  -4   51.85    1.51
   2   7  -4   48.93    1.26
   2  -7  -4   47.86    1.61
  -2  -7   4   49.34    1.73
  -2   7   4   49.22    1.83
  -2   1  10  124.55    3.05
  -2  -1  10  120.37    3.00
  -2  -1  10  122.08    2.79
  -2  -1  10  122.70    2.93
  -2   1  10  119.64    3.24
  -2   1  10  123.64    2.86
  -6   2  10   14.84    1.07
  -6  -2  10   16.78    0.80
  -6   2  10   17.61    1.12
  -3   7  -2  152.43    3.19
   3  -7   2  161.71    3.15
  -3  -7  -2  149.84    3.59
   3  -7   2  150.20    3.38
  -3   7  -2  150.32    3.23
   3   7   2  151.27    3.05
   3  -7   2  146.49    3.46
   8  -4   3  113.45    2.84
   8   4   3  115.37    2.24
   8   4   3  109.50    2.32
   8   4   3  111.28    2.98
  -3  -2  -8  162.25    4.12
   3   2   8  161.53    3.42
  -3  -2  -8  171.90    3.74
   3  -2   8  164.08    3.53
  -3  -2  -8  170.57    3.76
   3   2   8  163.42    4.04
   3  -2   8  164.87    3.75
   3   2   8  165.80    3.58
   4   3   7  251.20    5.58
   4  -3   7  251.73    5.05
   4   3   7  268.74    5.21
  -4  -3  -7  256.11    5.72
   4   3   7  257.39    4.85
   4  -3   7  257.87    5.20
   5  -7  -2  126.87    3.19
  -5   7   2  137.42    3.23
   5  -7  -2  135.78    2.92
  -5   7   2  139.15    3.71
   5  -7  -2  134.11    2.60
   5   7  -2  131.44    2.51
   5   7  -2  125.13    2.31
  -5  -7   2  131.87    3.24
   5   7  -2  138.69    2.76
  -7  -6   5   78.52    2.33
   7  -6  -5   78.79    2.04
   7  -6  -5   74.18    2.25
  -7   6   5   76.33    2.38
  -4  -7  -1   18.86    1.11
   4  -7   1   22.65    0.99
  -4   7  -1   21.03    0.95
   4   7   1   22.54    0.77
   4  -7   1   22.68    0.93
  -4   7  -1   23.12    1.23
   4   7   1   21.90    1.10
   4  -7   1   22.22    1.11
   9   0   4  240.99    4.68
  -9   0  -4  240.80    4.50
   9   0   4  227.95    5.16
  -9   0  -4  238.26    5.37
   1  -7  -4   60.60    1.78
  -1  -7   4   61.44    1.71
   1   7  -4   59.63    1.50
   1   7  -4   59.62    1.38
  -1  -7   4   61.20    1.98
   1  -7  -4   61.28    1.77
   5  -7  -1   93.92    2.61
   5  -7  -1   96.28    2.10
   5  -7  -1  100.51    2.32
  -5  -7   1   95.80    2.62
   5   7  -1   97.80    2.30
   5   7  -1   89.81    1.98
  -5   7   1   94.79    2.46
   5   7  -1   94.96    1.77
  -5   7   1   95.76    2.92
  -3  -7   4  143.58    3.40
   3   7  -4  142.77    2.70
  -3   7   4  144.87    3.54
   3   7  -4  132.88    2.50
   3  -7  -4  145.17    3.29
   3  -7  -4  144.49    2.91
  -5  -6  -3    2.23    0.67
   5  -6   3    2.01    0.40
   5   6   3    3.03    0.30
   5  -6   3    2.23    0.52
   5   6   3    1.81    0.54
   5   6   3    2.50    0.40
  -5   6  -3    3.27    0.57
   5   6   3    2.59    0.65
   8  -1 -10   39.14    1.46
  -8   1  10   40.67    1.81
  -8  -1  10   41.33    1.30
  -8   1  10   38.57    1.71
  -8  -1  10   38.97    1.45
  11   4  -4    1.45    0.38
 -11  -4   4    1.49    0.55
 -11   4   4    1.53    0.53
  11  -4  -4    1.74    0.54
  11  -4  -4    1.99    0.48
  11  -4  -4    1.64    0.17
  11  -4  -3   17.54    1.08
 -11   4   3   19.07    1.07
 -11  -4   3   17.29    1.14
  11  -4  -3   18.72    1.00
  11   4  -3   19.48    0.91
  11  -4  -3   19.27    0.65
   6   6   2  153.38    2.30
  -6  -6  -2  153.10    3.37
   6   6   2  152.03    3.13
   6  -6   2  154.83    2.99
  -6   6  -2  153.52    3.21
   6  -6   2  154.68    2.84
   6   6   2  148.07    3.15
   6  -6   2  145.74    3.08
   8   0   5   -0.02    0.35
   8   0   5    0.09    0.52
  -8   0  -5   -0.32    0.57
  -8   0  -5   -0.17    0.34
  10  -3  -8   99.25    2.62
  10  -3  -8   95.01    2.35
 -10   3   8   97.02    3.14
 -10  -3   8   94.78    2.55
  -8  -3  -4   18.82    1.31
   8   3   4   19.72    0.75
   8   3   4   19.06    1.15
   8   3   4   18.04    0.78
   8  -3   4   17.40    1.04
  -9   5   0   67.71    2.39
   9   5   0   70.09    2.03
  -9  -5   0   65.81    2.34
   9  -5   0   67.72    2.16
   9  -5   0   66.74    2.01
   9  -5   0   70.03    1.89
  -9   5   0   71.04    1.81
   8   6  -3    7.80    0.50
   8  -6  -3    7.85    0.67
  -8  -6   3    7.85    0.84
   8  -6  -3    8.33    0.82
  -8   6   3    6.16    0.90
  -8   6   3    8.22    0.74
   8   6  -2    0.97    0.38
   8  -6  -2    0.84    0.40
   8  -6  -2    0.55    0.53
   8  -6  -2    0.86    0.28
  -8   6   2    1.21    0.63
  -8   6   2    1.37    0.44
  11  -3  -7    0.19    0.45
 -11  -3   7    0.11    0.44
  11  -3  -7    0.25    0.37
 -11   3   7   -0.27    0.53
  11   3  -7    0.03    0.24
  -3  -2  10  113.44    2.62
  -3  -2  10  117.07    2.72
  -3   2  10  117.04    2.78
  -3  -2  10  113.40    2.86
  -3   2  10  115.77    3.05
  11  -2  -8   85.35    2.39
  11  -2  -8   87.48    2.23
 -11  -2   8   91.96    2.40
  11   2  -8   86.51    2.03
  11   2  -8   93.49    1.97
 -13   0   4   99.16    2.61
  13   0  -4   99.89    2.60
  13   0  -4   97.08    2.40
   3   5   6  184.87    4.48
   3   5   6  188.64    3.71
   3  -5   6  188.90    3.81
   3  -5   6  185.21    3.99
  -3   5  -6  189.91    3.92
  -3  -5  -6  190.15    4.44
   3   5   6  188.43    4.28
   6   4   5   49.12    1.44
   6   4   5   50.80    1.33
  -6   4  -5   50.98    1.49
   6   4   5   47.84    1.87
   6   4   5   49.56    1.73
  -6  -4  -5   44.33    1.92
   6  -4   5   51.72    1.71
   6  -4   5   49.24    1.67
   0  -6  -6   80.81    2.16
   0  -6   6   84.08    2.15
   0  -6  -6   87.64    2.40
   0   6   6   81.06    2.53
   0   6  -6   86.87    1.88
  -2   7  -3    0.05    0.38
  -2  -7  -3    0.18    0.32
   2  -7   3    0.62    0.45
   2  -7   3    0.49    0.38
  -2  -7  -3    0.37    0.63
   2   7   3   -0.23    0.39
   2   7   3    0.13    0.55
  11   3   0   42.14    1.59
 -11  -3   0   39.62    1.78
  11  -3   0   40.50    1.50
  11  -3   0   40.83    1.55
  11  -3   0   41.50    1.60
  11   3   0   41.19    1.05
  11  -2   1   97.79    2.57
  11   2   1  102.37    2.23
 -11   2  -1  101.88    2.75
  11   2   1   97.34    2.74
 -11  -2  -1   93.32    2.91
  11  -2   1  102.66    2.78
   9   3   3  401.88    6.51
  -9  -3  -3  392.41    7.71
   9   3   3  402.21    6.44
   9   3   3  393.16    7.35
   9  -3   3  378.80    6.99
   9  -3   3  397.84    7.24
 -10   0  -3   -0.11    0.37
  10   0   3    0.53    0.53
  10   0   3    0.08    0.39
 -10   0  -3   -0.20    0.52
   9  -1   4   94.07    2.39
   9  -1   4   93.45    2.70
   9   1   4   92.49    2.72
  -9  -1  -4   95.22    2.30
   9   1   4   95.24    2.23
  -9  -1  -4   94.04    2.94
  -9   1  -4   88.18    2.78
  -9   1  -4   97.47    2.01
   5   7  -3    4.66    0.28
  -5  -7   3    4.97    0.64
   5   7  -3    4.61    0.30
  -5   7   3    5.57    0.68
  -5   7   3    6.00    0.89
   5  -7  -3    4.48    0.64
  -7  -2  10    5.77    0.47
  -7   2  10    6.10    0.80
  -7   2  10    6.77    0.83
  12   3  -4  122.55    2.20
  12  -3  -4  121.84    3.08
  12  -3  -4  127.33    2.45
  12   3  -4  123.93    2.82
  -6   6   6  276.27    5.86
   6  -6  -6  275.78    5.61
  -6   6   6  267.65    6.17
  -6  -6   6  270.25    5.67
   7   3   5   15.24    0.91
   7  -3   5   15.29    0.97
   7   3   5   15.03    0.69
 -12  -2   1  172.78    4.26
  12  -2  -1  176.28    3.93
  12   2  -1  180.92    4.02
  12  -2  -1  168.80    3.68
  12   2  -1  187.06    3.49
  12  -2  -1  176.92    4.07
 -12   2   1  176.76    3.94
  -4   5   8  195.67    4.75
  -4   5   8  200.98    4.66
  -4  -5   8  200.59    3.86
   4  -5  -8  199.45    4.30
  -4  -5   8  193.06    4.50
  -3   4  -7  211.43    4.40
   3   4   7  210.15    4.92
   3   4   7  211.88    4.60
   3  -4   7  202.91    4.33
   3   4   7  219.72    4.17
   3  -4   7  216.38    4.33
  -3  -4  -7  213.44    4.90
  13   0  -5   -0.03    0.36
  13   0  -5    0.20    0.39
 -13   0   5    0.33    0.61
  13   0  -5   -0.08    0.39
   1   2   9   65.54    1.82
   1  -2   9   64.40    1.82
   1  -2   9   66.10    1.97
   1   2   9   65.89    2.25
   1   2   9   63.31    1.95
  -1  -2  -9   65.21    2.02
   9   4   2   11.16    0.89
   9   4   2   12.47    0.54
   9   4   2   12.97    0.52
  -9  -4  -2   11.31    1.03
   9  -4   2   12.08    0.87
  -9   4  -2   11.97    0.47
   0  -7  -4   79.05    2.08
   0  -7  -4   81.76    2.20
   0   7  -4   80.65    1.81
   0  -7   4   79.51    2.11
   0  -7   4   79.44    2.34
  -4  -4   9  586.55   10.02
   4  -4  -9  586.25   10.49
  -4   4   9  569.29   10.85
  -4   4   9  580.28   10.91
  -1  -5  -7  339.78    6.28
  -1   5  -7  337.63    6.13
   1  -5   7  319.84    6.27
  -1  -5  -7  352.81    6.74
   1   5   7  325.79    6.69
   4   6   4   61.56    1.63
  -4   6  -4   61.51    1.78
   4  -6   4   60.98    1.91
   4   6   4   59.13    2.02
   4   6   4   64.61    2.15
   4  -6   4   60.33    1.65
  -4  -6  -4   60.61    2.10
  -8  -1  -5  665.93   12.67
  -8  -1  -5  699.25   11.72
   8   1   5  673.09   11.64
   8   1   5  667.32   12.40
  -8   1  -5  694.80   11.28
   8  -1   5  677.78   11.82
   8  -1   5  666.78   12.28
  -5   4   9    7.16    0.87
  -5   4   9    5.09    0.76
   5  -4  -9    5.93    0.66
  -5  -4   9    5.97    0.50
 -12   0   0   40.75    1.75
  12   0   0   43.31    1.66
  12   0   0   41.57    1.39
   4   7  -4   13.14    0.51
  -4  -7   4   12.19    0.87
  -4   7   4   11.73    0.91
   4  -7  -4   12.25    0.84
  -9   5   6   10.08    0.91
  -9  -5   6    9.34    0.82
   9  -5  -6   10.27    0.71
  -9   5   6    7.98    1.00
   9  -5  -6    8.17    0.79
   5   2   7   60.45    2.16
  -5  -2  -7   63.70    1.92
   5   2   7   64.86    1.81
   5   2   7   65.02    1.70
  -5  -2  -7   56.89    2.20
   5  -2   7   60.66    2.02
   7  -5   3    6.47    0.67
   7   5   3    4.98    0.34
   7   5   3    5.93    0.71
  -7  -5  -3    7.11    0.87
  -7   5  -3    6.30    0.69
   7   5   3    5.23    0.70
   7  -5   3    4.15    0.62
   7   5   3    5.17    0.43
   5  -7   0  540.46    9.28
  -5  -7   0  499.06    9.58
   5   7   0  524.36    9.44
  -5   7   0  527.03    9.36
   5  -7   0  515.96    9.67
  -5   7   0  547.83   10.11
   5   7   0  527.01    8.67
   5  -7   0  537.46    9.19
  11  -4  -5   70.63    2.07
 -11   4   5   71.02    2.32
 -11  -4   5   75.40    2.30
  11  -4  -5   70.34    2.20
  11   4  -5   73.56    1.75
  -3   5   8  190.87    4.52
  -3  -5   8  185.75    3.74
   3  -5  -8  193.44    4.13
  -1   0  10    0.32    0.40
  -1   0  10    0.06    0.35
  -1   0  10    0.12    0.49
  12   3  -3  206.75    3.59
  12   3  -3  209.72    4.35
 -12  -3   3  215.94    4.79
  12  -3  -3  218.11    3.96
  12  -3  -3  215.94    4.61
  12  -3  -3  203.76    4.47
  11  -4  -2  126.27    3.08
  11  -4  -2  118.88    3.14
  11   4  -2  122.56    2.89
  11  -4  -2  125.40    2.59
 -11   4   2  127.17    3.03
 -11  -4   2  123.78    3.37
 -13   0   3    0.50    0.52
  13   0  -3    0.63    0.45
  13   0  -3    0.37    0.44
  -5  -5   8    0.58    0.30
  -5  -5   8    0.37    0.51
  -5   5   8    0.30    0.52
   5  -5  -8   -0.04    0.39
  -5   5   8   -0.18    0.59
   8  -6  -4  376.01    7.38
  -8   6   4  377.95    7.99
  -8  -6   4  383.17    7.42
   8  -6  -4  381.52    7.06
  -8   6   4  375.43    7.38
   6   5   4  112.99    2.47
   6  -5   4  118.51    2.80
   6  -5   4  110.42    2.85
  -6  -5  -4  111.16    3.17
   6   5   4  117.33    2.33
  -6   5  -4  118.67    2.76
   6   5   4  109.76    2.95
   6   5   4  114.98    3.12
  -7   6  -1    0.94    0.32
  -7  -6  -1    0.57    0.71
   7  -6   1    0.64    0.48
  -7   6  -1    0.14    0.49
   7  -6   1    0.69    0.43
   7   6   1    0.52    0.45
   7  -6   1    0.15    0.50
   7   6   1    0.47    0.11
  13  -1  -4  178.27    3.99
  13   1  -4  177.75    3.93
  13  -1  -4  187.15    3.68
 -13   1   4  178.81    3.88
  13  -1  -4  180.59    3.91
  13   1  -4  179.91    3.61
 -13  -1   4  180.36    4.11
  -8   5   7   70.73    2.36
  -8   5   7   66.45    2.52
   8  -5  -7   66.30    2.13
  -8  -5   7   63.93    2.09
  10  -5  -3   12.79    0.83
 -10   5   3   13.18    1.19
  10   5  -3   12.56    0.71
 -10   5   3   11.62    0.86
  10  -5  -3    9.95    0.92
 -10  -5   3   12.70    0.97
   8  -6  -1   19.90    1.02
   8   6  -1   18.93    0.94
  -8   6   1   22.78    1.38
   8  -6  -1   20.86    1.17
   8  -6  -1   20.69    0.87
  -8   6   1   20.43    0.99
   7   0   6  244.73    5.43
   7   0   6  253.08    4.91
  -7   0  -6  248.24    5.68
  -7   0  -6  261.62    4.75
   4   0   8   11.03    0.70
   4   0   8   11.70    0.97
  -4   0  -8   12.45    0.72
 -10  -4   7  170.26    3.89
 -10   4   7  163.80    4.15
 -10   4   7  166.06    4.50
  12   3  -5  754.59   12.93
  12  -3  -5  793.12   12.48
 -12  -3   5  751.84   13.41
  12  -3  -5  756.92   13.37
  -3  -4   9   46.85    1.39
  -3   4   9   45.41    1.83
   3  -4  -9   44.49    1.59
  10  -1   3   16.11    0.89
  10   1   3   16.57    0.82
 -10  -1  -3   15.20    1.16
  10  -1   3   15.22    1.05
 -10   1  -3   16.74    0.72
 -10  -1  -3   16.41    0.87
 -10   1  -3   17.98    1.16
 -10  -2   9    0.81    0.30
 -10   2   9    0.50    0.66
  10  -2  -9    0.84    0.46
 -10   2   9    0.99    0.60
 -10  -2   9    0.70    0.42
   2   0   9    0.09    0.47
  -2   0  -9    0.02    0.33
   1   4   8   21.29    1.18
  -1  -4  -8   22.29    1.23
   1   4   8   21.35    1.34
   1   4   8   22.25    0.97
   1  -4   8   21.66    0.99
   0   3   9   10.97    0.72
   0  -3   9   10.33    0.69
   0  -3   9   10.25    0.72
   0   3   9    8.40    0.79
   0   3   9   11.72    1.01
  -9   0  10    0.37    0.39
   9   0 -10    0.35    0.38
  13   1  -5   30.68    1.06
  13  -1  -5   28.01    1.04
 -13  -1   5   28.14    1.35
  13  -1  -5   27.05    1.16
  13  -1  -5   27.64    1.21
  13   1  -5   26.50    1.15
  -6   4   9   79.35    2.58
  -6   4   9   81.61    2.65
   6  -4  -9   77.83    2.28
  -6  -4   9   79.59    2.43
  -6  -4   9   77.87    1.84
 -10  -5   4   21.43    1.21
 -10   5   4   18.52    1.37
 -10   5   4   19.36    1.12
  10  -5  -4   18.21    1.11
  10   5  -4   22.16    0.82
  10  -5  -4   20.74    1.04
  12   1   0  124.96    2.76
 -12   1   0  123.54    3.23
  12  -1   0  124.54    2.95
 -12  -1   0  126.35    3.40
  12   1   0  129.54    3.24
  12   2  -7    6.75    0.53
  12  -2  -7    7.99    0.73
  12   2  -7    6.90    0.48
  12  -2  -7    7.80    0.67
 -12  -2   7    7.77    0.71
  -8   5  -2    0.31    0.48
   8   5   2    0.14    0.22
   8   5   2    1.04    0.50
   8  -5   2    0.21    0.42
   8  -5   2    0.59    0.46
  -8   5  -2    0.39    0.17
  -1  -1  10  672.74   11.81
  -1   1  10  700.91   12.45
  -1   1  10  683.21   12.03
  -1  -1  10  689.00   12.13
  -1   1  10  682.57   11.86
  13   1  -3   37.57    1.23
 -13   1   3   37.40    1.45
  13  -1  -3   38.76    1.54
  13   1  -3   36.44    1.43
  13  -1  -3   36.86    1.40
  13  -1  -3   34.83    1.24
 -13  -1   3   36.12    1.58
  -2   5   8  150.33    3.74
   2  -5  -8  144.38    3.32
  -2  -5   8  144.92    3.09
   2  -5  -8  139.97    3.34
  -2   2  10  156.00    3.70
  -2  -2  10  150.12    3.30
  -2  -2  10  162.28    3.46
 -10   5   2  351.30    6.75
  10   5  -2  357.48    6.58
 -10  -5   2  353.72    7.15
  10  -5  -2  364.39    6.83
 -10   5   2  341.77    7.51
  -9  -4   8    4.19    0.62
  -9   4   8    4.51    0.85
  10  -3   2  101.17    2.70
  10  -3   2  105.43    2.84
 -10  -3  -2  101.30    3.09
 -10   3  -2  104.55    2.06
  10   3   2  107.49    2.22
  10   3   2  102.60    2.18
  10   3   2  104.78    2.89
  -9  -3   9  679.76   11.18
   9  -3  -9  638.55   11.82
  -9  -3   9  666.06   11.87
  -9   3   9  658.59   12.56
  -9   3   9  659.49   12.34
  -7  -1  -6    0.27    0.40
   7   1   6    0.25    0.35
   7   1   6   -0.05    0.52
   7  -1   6    1.08    0.38
  -7  -1  -6    0.11    0.56
   7  -1   6    0.17    0.50
  13   0  -6    6.12    0.61
  13   0  -6    5.90    0.57
 -13   0   6    6.68    0.74
  13   0  -6    6.91    0.62
   4   1   8  597.99   10.72
   4   1   8  600.77   11.41
  -4  -1  -8  644.95   10.92
   4  -1   8  632.29   11.28
  -4  -1  -8  631.00   10.86
  -6  -5   8  413.00    8.05
  -6  -5   8  412.88    7.13
   6  -5  -8  407.57    7.78
  -6   5   8  402.86    8.19
  -6   5   8  414.66    8.45
  12   0  -8  378.20    6.91
  12   0  -8  384.26    7.06
 -12   0   8  383.80    6.95
  11   0  -9    0.02    0.29
 -11   0   9   -0.26    0.37
  11   0  -9    0.24    0.36
   2  -1   9   22.42    0.99
   2   1   9   22.20    0.99
   2   1   9   21.05    1.26
   2  -1   9   23.31    1.20
   2   1   9   22.06    1.00
  -2  -1  -9   21.26    1.02
   6  -3   6    0.89    0.49
  -6  -3  -6    0.62    0.63
   6  -3   6    0.20    0.39
   6   3   6    0.64    0.53
   6   3   6    0.17    0.27
   6   3   6   -0.10    0.50
  -9  -1  10   36.86    1.42
  -9   1  10   35.10    1.73
   9  -1 -10   36.58    1.39
  -9   1  10   34.72    1.70
  -5   4  -6    2.80    0.29
   5  -4   6    3.04    0.56
  -5  -4  -6    2.88    0.72
   5   4   6    2.97    0.65
   5   4   6    2.74    0.37
   5  -4   6    2.29    0.51
  12  -3  -2   55.43    1.88
  12  -3  -2   51.22    1.83
  12  -3  -2   55.35    1.51
  12   3  -2   54.33    1.76
 -12  -3   2   57.08    2.12
  -8  -2  10   14.06    0.93
  -8  -2  10   13.50    0.70
  -8   2  10   15.03    1.14
  -8   2  10   14.24    1.09
   8  -2 -10   14.24    0.89
   5  -5   5 1171.17   17.94
   5   5   5 1083.06   18.23
  -5  -5  -5 1168.70   18.74
   5   5   5 1147.45   18.58
   5   5   5 1224.31   17.50
   5   5   5 1139.30   17.66
   5  -5   5 1129.15   18.06
  -1  -7  -4  280.85    5.66
   1   7   4  280.76    5.92
   1  -7   4  280.86    5.53
  -1   7  -4  286.92    5.20
   1  -7   4  285.46    5.77
  -1  -7  -4  287.06    5.40
 -11   0  -2  208.30    4.86
  11   0   2  216.27    4.24
 -11   0  -2  209.92    4.11
  -5   7   4   27.83    1.36
   5  -7  -4   25.75    1.24
  -5  -7   4   27.82    1.31
   5  -7  -4   25.37    0.78
   5   7  -4   29.37    0.76
   4  -7   2   80.06    2.34
   4  -7   2   82.53    2.19
  -4   7  -2   82.51    1.99
   4   7   2   83.23    2.43
   4   7   2   85.29    2.51
  -4  -7  -2   85.08    2.50
  -4   7  -2   82.26    2.42
   4   7   2   84.25    1.88
   4  -7   2   82.97    2.03
   2  -4  -9    0.57    0.41
  -2  -4   9    0.58    0.35
  -2   4   9    0.10    0.53
   3   6   5   15.43    0.83
   3   6   5   16.36    1.09
  -3  -6  -5   16.10    0.77
   3  -6   5   14.71    0.90
   3   6   5   14.64    1.08
  -3   6  -5   15.67    0.84
  -3  -6  -5   16.31    1.07
   6  -7  -2  254.42    5.39
   6  -7  -2  263.84    5.03
  -6  -7   2  250.54    5.37
   6   7  -2  243.58    4.49
   6   7  -2  274.04    4.84
  -6   7   2  261.61    5.29
  -6   7   2  268.51    5.94
  -1  -6  -6   20.26    0.94
  -1   6  -6   21.27    0.86
   1  -6   6   19.18    0.98
   1   6   6   19.52    1.17
  13   0  -2    9.48    0.82
 -13   0   2    7.63    0.82
  13   0  -2    8.85    0.69
 -10  -5   5  492.98    9.29
  10  -5  -5  475.79    9.19
  10  -5  -5  504.89    9.05
 -10   5   5  507.32    9.40
  13   1  -6  293.82    5.69
  13  -1  -6  298.66    5.81
  13  -1  -6  305.03    5.52
  13  -1  -6  299.65    5.81
  13   1  -6  296.49    5.50
 -13  -1   6  294.84    5.84
  10  -4   1  139.84    3.19
 -10   4  -1  135.07    2.75
  10  -4   1  124.56    3.24
  10  -4   1  132.53    3.33
  10   4   1  136.04    3.34
 -10  -4  -1  144.27    3.72
  -7  -4   9  436.90    8.25
  -7  -4   9  416.81    7.35
  -7   4   9  422.84    8.58
  -7   4   9  412.76    8.40
   7  -4  -9  431.66    8.05
 -11   4   6  143.96    4.12
  11  -4  -6  138.47    3.43
 -11   4   6  139.21    3.65
  11   4  -6  140.41    2.73
 -11  -4   6  138.90    3.44
  12  -1  -8  346.43    6.58
  12   1  -8  334.12    6.28
 -12  -1   8  348.74    6.52
  12   1  -8  349.23    6.26
  12  -1  -8  349.77    6.44
 -12  -3   6   83.04    2.42
  12  -3  -6   82.97    2.40
  12   3  -6   84.94    1.98
  12  -3  -6   83.48    2.28
   9  -2   4    9.29    0.73
   9  -2   4    8.65    0.85
   9   2   4    9.21    0.59
  -9  -2  -4   10.05    1.00
  11   1  -9  108.09    2.50
 -11  -1   9  107.78    2.63
  11  -1  -9  103.87    2.44
  11  -1  -9  111.88    2.74
   7  -6  -6    1.16    0.53
  -7   6   6    1.60    0.69
  -7   6   6    1.71    0.59
  -7  -6   6    0.98    0.53
   5  -7   1  259.06    5.00
   5   7   1  240.16    5.34
   5  -7   1  252.40    5.33
   5  -7   1  260.94    4.96
   5   7   1  264.79    5.29
  -5   7  -1  261.51    4.95
  -5  -7  -1  259.80    5.48
  -5   7  -1  264.50    5.60
  11   4  -1  462.58    8.49
  11  -4  -1  475.78    8.20
 -11   4   1  465.23    8.37
  11  -4  -1  453.47    8.62
 -11  -4   1  455.69    9.02
  11  -4  -1  450.25    8.67
   8  -6  -5   11.44    0.74
  -8   6   5   10.32    0.92
   8  -6  -5   12.66    0.95
  -8  -6   5   11.19    0.92
   3  -7   3    4.09    0.44
   3   7   3    4.12    0.50
   3  -7   3    3.73    0.61
  -3   7  -3    4.59    0.54
  -3  -7  -3    4.58    0.81
   3   7   3    3.74    0.70
   3  -7   3    4.07    0.54
   6   7  -1   18.67    0.89
   6  -7  -1   19.07    1.13
   6  -7  -1   18.61    0.91
  -6   7   1   19.42    1.27
  -6  -7   1   16.40    1.06
  -6   7   1   18.21    0.97
   6  -7  -1   17.35    0.73
   3  -6  -7  122.09    2.70
  -3  -6   7  121.06    2.64
   3  -6  -7  115.46    2.97
  -3   6   7  114.85    3.26
  -5  -3  10   85.97    2.11
  -5   3  10   87.25    2.71
   5  -3 -10   87.84    2.45
 -11   1  -2 1006.86   17.64
  11  -1   2 1002.88   17.49
 -11   1  -2 1006.08   16.67
 -11  -1  -2 1007.52   17.83
  11  -1   2 1003.81   17.07
  11   1   2 1015.73   16.83
  -4   6   7    9.37    0.99
  -4  -6   7    9.12    0.59
   4   6  -7    9.76    0.56
   4  -6  -7    8.72    0.77
  -4   6   7    8.98    0.89
   8   2   5  254.45    4.73
   8  -2   5  242.49    4.99
   8   2   5  248.63    5.45
   8  -2   5  242.73    5.30
  -8  -2  -5  251.73    5.72
   6  -7  -3    7.22    0.77
  -6  -7   3    6.63    0.74
   6  -7  -3    7.43    0.62
  -6   7   3    7.89    0.78
   6  -7  -3    6.79    0.36
  -6   7   3    8.03    0.99
   8  -6   0  610.68   10.85
  -8   6   0  605.24   11.47
   8  -6   0  607.82   11.12
  -8   6   0  616.37   10.60
   8   6   0  620.10   10.87
   8  -6   0  613.01   10.64
  -2  -7   5   18.33    0.88
   2   7  -5   18.34    0.74
   2  -7  -5   20.36    1.02
  -2  -7   5   19.07    1.13
   2  -7  -5   21.16    0.95
  -3  -7   5   12.11    0.91
   3   7  -5   12.66    0.59
   3  -7  -5   13.11    0.70
   3  -7  -5   14.19    0.90
  -3   7   5   12.30    0.98
  -4  -3  10  166.99    3.48
   4  -3 -10  172.92    3.85
  -4   3  10  164.32    4.11
  -4   3  10  174.20    4.09
   1  -5  -8  168.67    3.71
  -1  -5   8  166.55    3.51
  -1   5   8  165.34    4.05
   1  -5  -8  166.30    3.79
  13  -1  -2  285.15    5.73
 -13  -1   2  303.53    6.17
  13   1  -2  293.84    5.97
  13  -1  -2  298.34    6.02
  13   1  -2  293.67    5.50
 -13   1   2  294.09    5.96
   9   5   1  283.16    4.73
   9   5   1  304.77    5.87
  -9  -5  -1  267.71    6.11
  -9   5  -1  311.96    6.26
   9  -5   1  296.39    5.90
  -9   5  -1  262.15    5.10
   9  -5   1  314.44    5.71
   9  -5   1  291.18    5.78
  -6   0  -7   -0.02    0.35
   6   0   7    0.28    0.54
   6   0   7   -0.14    0.32
 -13  -2   4   -0.56    0.76
  13  -2  -4    0.04    0.35
  13  -2  -4    0.73    0.49
  13   2  -4   -0.09    0.26
  13   2  -4   -0.03    0.40
  13  -2  -4   -0.15    0.42
  -6  -3  10   85.05    2.06
   6  -3 -10   84.96    2.40
  -6   3  10   90.14    2.74
  -6   3  10   84.79    2.68
   3   3   8  215.94    5.00
  -3  -3  -8  209.76    4.99
   3   3   8  211.68    4.23
   3   3   8  212.29    4.50
   3  -3   8  215.16    4.41
   3  -3   8  217.13    4.49
  10  -5  -1  351.52    6.40
  10  -5  -1  357.56    6.87
 -10   5   1  349.82    7.50
  10   5  -1  352.01    6.72
 -10  -5   1  353.45    7.28
 -10   5   1  366.55    6.67
 -10  -2  -3  397.59    8.15
  10   2   3  393.90    7.78
  10  -2   3  378.81    7.36
  10   2   3  405.76    7.03
  10  -2   3  398.67    7.73
  -2  -6   7   52.97    1.55
  -2   6   7   54.26    2.03
   2  -6  -7   51.82    1.64
   2  -6  -7   51.43    1.71
  -7   5   8   37.39    1.83
  -7  -5   8   37.33    1.61
  -7   5   8   39.26    1.76
   7  -5  -8   39.58    1.55
   0   0  10   13.20    0.95
   0   0  10   13.13    0.79
  13  -2  -5 1036.81   17.66
 -13  -2   5 1038.44   17.82
  13   2  -5 1045.39   17.45
  13  -2  -5 1042.16   17.07
  13   2  -5 1031.67   16.98
  13  -2  -5 1016.91   17.64
   5  -6  -7    7.07    0.71
  -5   6   7    8.30    0.97
  -5  -6   7    6.20    0.77
  -2  -5  -7  143.14    3.62
   2  -5   7  142.41    3.24
  -2   5  -7  140.06    3.12
   2   5   7  145.27    3.06
   2   5   7  136.55    3.51
  -1  -7   5    0.14    0.41
   1  -7  -5    0.13    0.42
  -1  -7   5    0.13    0.48
   1  -7  -5    0.94    0.49
 -12   2   0    0.48    0.49
  12  -2   0    0.35    0.49
  12   2   0    0.92    0.52
 -12  -2   0    0.74    0.60
  12   2   0    0.16    0.33
  12  -2   0   -0.04    0.46
  -4  -7   5    0.34    0.47
   4   7  -5    0.28    0.25
   4  -7  -5    0.11    0.43
  -4   7   5    0.62    0.61
  -4   7   5    0.14    0.48
   1  -2 -10   29.49    1.38
  -1  -2  10   29.54    1.23
  -1   2  10   29.73    1.36
  -1  -2  10   28.16    1.13
  -1   2  10   29.98    1.51
  13   2  -3   25.41    0.87
 -13  -2   3   26.52    1.50
  13   2  -3   27.27    1.22
  13  -2  -3   23.11    1.21
  13  -2  -3   23.92    1.19
  13  -2  -3   24.89    0.99
  -6  -1  -7    7.21    0.94
  -6  -1  -7   10.21    0.71
   6  -1   7   10.11    0.72
   6   1   7   10.12    0.67
   6   1   7   10.47    0.92
   6  -1   7    9.96    0.90
   3  -3 -10   15.58    0.94
  -3  -3  10   16.65    0.82
  -3   3  10   16.21    1.09
 -11   3   8   11.97    1.20
  11  -3  -8   10.68    0.84
 -11  -3   8   11.48    0.86
  11   3  -8   12.19    0.51
  11  -3  -8   10.89    0.73
  13   0  -7    0.26    0.36
  13   0  -7    0.73    0.40
 -13   0   7    0.20    0.42
   6   6   3    5.10    0.72
   6   6   3    5.34    0.36
   6   6   3    3.95    0.69
  -6  -6  -3    4.66    0.82
   6  -6   3    4.55    0.65
   6  -6   3    4.95    0.58
  -6   6  -3    4.67    0.62
   7   2   6   17.62    1.17
   7  -2   6   16.74    1.09
  -7  -2  -6   15.31    1.27
   7  -2   6   17.77    0.95
  -7  -2  -6   17.92    0.96
   7   2   6   18.77    0.84
   7   2   6   18.13    0.91
   4   2   8   12.45    1.02
   4  -2   8   11.98    0.90
   4  -2   8   12.10    0.78
  -4  -2  -8   14.24    1.13
  -4  -2  -8   13.36    0.92
   4   2   8   11.59    0.81
   4   2   8   12.34    0.72
   9  -5  -7  269.28    5.52
  -9   5   7  255.29    6.14
  -9  -5   7  257.31    5.50
   9  -5  -7  262.69    5.19
  -9   5   7  260.49    5.75
   1  -4  -9   60.81    1.86
  -1   4   9   58.38    2.06
  -1  -4   9   54.30    1.64
 -11  -3  -1   20.32    1.32
  11   3   1   20.31    0.76
  11  -3   1   19.44    1.12
  11  -3   1   20.20    1.10
  11   3   1   21.20    1.19
  -6   7   0   93.23    2.11
   6  -7   0   88.96    2.40
   6  -7   0   91.30    1.96
   6   7   0   93.16    2.21
   6  -7   0   90.04    2.08
  -6   7   0   86.69    2.63
  10   0 -10   42.49    1.48
 -10   0  10   42.19    1.41
   2   2   9  342.88    6.44
  -2  -2  -9  348.93    6.74
   2   2   9  348.30    6.61
   2  -2   9  342.60    6.51
   2   2   9  344.03    7.11
   2  -2   9  352.76    6.76
   4  -5   6  207.25    4.45
   4   5   6  206.32    4.03
   4  -5   6  220.47    4.31
  -4  -5  -6  212.97    4.95
   4   5   6  207.37    4.63
   4   5   6  203.59    4.85
  -7  -3  10   23.83    0.92
   7  -3 -10   20.71    1.10
  -7  -3  10   23.46    1.25
  -7   3  10   22.55    1.39
  -7   3  10   24.74    1.39
  -2  -7  -4   84.62    2.07
  -2  -7  -4   86.56    2.46
   2   7   4   79.60    2.09
   2   7   4   83.93    2.57
   2  -7   4   85.26    2.32
  -2   7  -4   84.93    2.06
   0   1  10   71.97    2.07
   0  -1 -10   69.93    2.01
   0  -1  10   68.78    1.93
   0   1  10   66.40    2.28
   0  -1  10   72.35    2.18
 -12  -3   1   37.27    1.71
  12  -3  -1   33.96    1.29
  12  -3  -1   35.90    1.49
  12   3  -1   34.25    1.44
  12  -3  -1   35.65    1.54
   0  -8   0  665.21   11.76
   0   8   0  701.49   11.62
   0   8   0  682.92   12.06
   0  -8   0  668.55   11.84
  -9   2  10   77.23    2.69
   9  -2 -10   78.00    2.27
  -9  -2  10   80.35    2.35
  -9   2  10   74.41    2.59
  -9  -2  10   79.55    1.94
   1   3   9   87.23    2.45
   1   3   9   83.48    2.74
   1  -3   9   85.88    2.24
   1  -3   9   82.38    2.20
   1   3   9   82.84    2.16
  -9  -6   3   31.59    1.50
  -9   6   3   30.24    1.37
  -9   6   3   30.88    1.72
   9   6  -3   32.41    1.06
   9  -6  -3   30.25    1.46
   9  -6  -3   31.16    1.29
  -6   7   4   54.46    2.30
  -6   7   4   54.24    1.97
  -6  -7   4   56.30    1.98
   6  -7  -4   55.14    1.89
   5   3   7  380.07    7.05
   5  -3   7  364.93    7.02
   5  -3   7  372.86    7.17
   5   3   7  373.01    6.73
  -5  -3  -7  384.88    7.82
   5   3   7  371.48    7.59
   7   6   2    4.33    0.63
  -7  -6  -2    2.11    0.77
   7  -6   2    3.76    0.54
  -7   6  -2    3.42    0.63
   7  -6   2    3.69    0.63
  -8   4   9  247.58    5.86
  -8  -4   9  248.99    5.35
  -8   4   9  244.50    5.62
   8  -4  -9  255.06    5.30
  -5   0  11   -0.14    0.49
  -5   0  11    0.36    0.38
   2  -4   8  266.74    5.17
   2   4   8  253.39    5.45
   2   4   8  253.73    5.00
   2   4   8  263.21    5.85
  -2  -4  -8  258.26    5.68
   2  -4   8  268.05    5.11
  -2   4  -8  263.86    5.23
   5   6   4   30.83    1.45
  -5   6  -4   32.45    1.24
   5   6   4   29.52    0.92
  -5  -6  -4   29.63    1.51
   5   6   4   29.62    1.46
   5  -6   4   30.60    1.17
   5  -6   4   30.02    1.33
   5   6   4   27.54    1.02
  -1  -8   0   19.06    1.02
   1  -8   0   19.71    1.02
  -1   8   0   20.18    1.10
   1   8   0   20.73    0.86
   1  -8   0   20.50    0.98
   1   8   0   22.61    0.90
   1   8   0   20.40    1.17
  -6   0  11   -0.05    0.49
  -6   0  11    0.09    0.38
  -1  -6   7    7.33    0.65
  -1   6   7    7.01    0.84
   1  -6  -7    7.33    0.71
   1  -6  -7    7.08    0.67
   9   6  -2  130.54    2.89
   9  -6  -2  122.28    3.32
   9  -6  -2  125.37    3.07
  -9   6   2  123.81    3.68
  -9   6   2  128.63    3.11
  10  -5  -6  121.27    2.85
 -10   5   6  115.43    3.59
 -10  -5   6  117.99    3.05
  10   5  -6  108.09    2.02
 -10   5   6  117.77    3.20
  10  -5  -6  106.51    2.93
   0  -8   1  289.20    5.65
   0   8   1  285.55    5.92
   0   8  -1  302.48    5.42
   0  -8   1  284.50    5.70
   0   8  -1  298.09    5.82
   0  -8  -1  295.00    5.67
   0  -8  -1  290.82    5.59
  -1   8   1   95.12    2.67
  -1  -8   1   96.75    2.53
   1  -8  -1  101.23    2.43
   1   8  -1   97.63    2.62
   1   8  -1   96.69    2.17
   1  -8  -1   93.52    2.43
   1   8  -1  101.57    2.22
  12   0   1   -0.24    0.44
 -12   0  -1   -0.16    0.46
 -12   0  -1    0.30    0.55
 -13  -1   7  292.55    5.71
  13  -1  -7  286.67    5.65
  13   1  -7  295.99    5.55
  13  -1  -7  293.19    5.76
  13   1  -7  292.84    5.47
   4  -4   7  152.76    3.43
   4   4   7  157.67    3.20
   4   4   7  148.39    3.93
   4   4   7  152.27    3.59
  -4  -4  -7  151.13    3.97
   4  -4   7  147.09    3.42
  13   2  -6    0.32    0.36
  13  -2  -6    0.35    0.42
  13  -2  -6    0.47    0.51
 -13  -2   6   -0.27    0.50
  13   2  -6    0.50    0.30
  -6  -6   7    2.41    0.59
  -6   6   7    2.68    0.77
   6  -6  -7    2.40    0.52
   0  -7  -5  376.02    6.84
   0   7   5  359.36    7.33
   0  -7  -5  364.82    6.97
   0  -7   5  362.60    7.19
   0  -7   5  362.19    6.83
  10   1 -10  134.97    3.02
  10  -1 -10  130.71    3.15
 -10   1  10  129.39    3.72
 -10  -1  10  135.45    3.14
 -12  -2   8  194.75    4.20
  12  -2  -8  189.72    4.06
  12   2  -8  196.28    3.79
  12  -2  -8  190.68    4.24
  12   2  -8  201.49    3.77
 -13   0   1   -0.23    0.53
  13   0  -1    0.17    0.48
  13   0  -1    0.09    0.42
 -10   3   9    1.86    0.66
 -10  -3   9    2.49    0.55
  10  -3  -9    2.05    0.54
 -10   3   9    2.21    0.80
   9  -6  -4  496.34    9.46
  -9   6   4  503.26    9.44
   9  -6  -4  515.43    9.17
  -9  -6   4  505.09    9.50
  -9   6   4  490.13   10.06
  11  -2  -9  134.29    3.05
  11  -2  -9  137.08    3.32
 -11  -2   9  138.17    3.27
 -11   2   9  142.81    4.04
 -11   2   9  142.87    3.91
  11   2  -9  143.83    2.97
  -5   7   5   -0.29    0.56
   5  -7  -5    0.16    0.18
  -5   7   5    0.51    0.61
  -5  -7   5    0.04    0.46
   5  -7  -5   -0.12    0.47
  -4   0  11   -0.08    0.43
  -4   0  11   -0.15    0.38
  -4   0  11    0.39    0.52
  11  -2   2    2.67    0.63
 -11   2  -2    2.64    0.67
 -11  -2  -2    2.46    0.73
  11   2   2    2.87    0.43
  11  -2   2    2.56    0.56
  11   2   2    2.65    0.64
  -2  -6  -6   27.89    1.09
   2   6   6   25.74    1.36
  -2  -6  -6   26.75    1.36
   2  -6   6   26.30    1.19
  -2   6  -6   27.30    1.06
   2   6   6   27.11    1.47
 -10   4   8    3.00    0.84
 -10   4   8    2.77    0.70
 -10  -4   8    2.23    0.57
  10  -4  -8    2.44    0.47
  12   3  -7  126.51    2.61
  12  -3  -7  128.45    3.05
  12  -3  -7  128.15    3.21
 -12   3   7  125.83    3.57
 -12  -3   7  125.02    3.17
   8  -4   4   35.41    1.47
   8   4   4   34.60    1.14
  -8   4  -4   35.60    1.44
   8   4   4   35.04    1.05
   8   4   4   36.73    1.62
   0   5   8   29.92    1.47
   0  -5  -8   32.35    1.42
   0  -5   8   28.48    1.17
   0  -5  -8   31.32    1.26
  -5   1  11  153.45    3.44
  -5   1  11  150.35    3.77
  -5  -1  11  158.00    3.73
  -5  -1  11  145.88    3.29
  -5  -1  11  152.12    3.52
  -7   0  11    0.31    0.50
  -7   0  11    0.30    0.39
  -6  -1  11    5.09    0.77
  -6   1  11    4.86    0.58
  -6   1  11    4.80    0.77
  -6  -1  11    5.36    0.56
   1  -8   1    0.82    0.43
  -1   8  -1    1.00    0.42
  -1   8  -1    0.98    0.52
   1   8   1    0.29    0.60
  -1  -8  -1    1.33    0.50
   1  -8   1    0.96    0.52
   1   8   1    0.95    0.41
   2  -8  -1   74.95    1.95
   2   8  -1   74.85    1.72
   2   8  -1   69.13    2.16
   2   8  -1   73.84    1.76
  -2   8   1   73.92    2.23
   2  -8  -1   68.03    2.07
  -2  -8   1   75.86    2.17
  13  -2  -2   82.31    2.37
  13   2  -2   85.96    1.97
 -13  -2   2   83.79    2.65
  13  -2  -2   85.95    2.17
  13   2  -2   83.31    2.41
  -2  -3  10    8.89    0.63
  -2   3  10    7.76    0.67
  -2   3  10    6.85    0.84
   3   0   9    0.06    0.35
   3   0   9   -0.19    0.53
 -11   4   7   85.59    2.75
 -11   4   7   90.40    3.12
 -11  -4   7   85.88    2.49
  11  -4  -7   85.88    2.51
   2  -8   0    3.29    0.52
   2   8   0    2.66    0.67
   2   8   0    2.95    0.43
  -2  -8   0    3.17    0.57
   2   8   0    2.87    0.43
  -2   8   0    2.40    0.57
   2  -8   0    2.94    0.62
   8  -6  -6   41.81    1.66
  -8  -6   6   41.12    1.68
  -8   6   6   39.56    1.76
  -8   6   6   40.01    2.01
 -12   1  -1    4.84    0.56
  12   1   1    6.14    0.57
  12  -1   1    5.59    0.62
 -12   1  -1    6.10    0.82
  12   1   1    5.74    0.74
  12  -1   1    5.19    0.72
 -12  -1  -1    4.31    0.81
 -11  -4   0   76.64    2.58
  11  -4   0   75.17    2.29
  11  -4   0   76.99    2.33
 -11   4   0   79.15    1.98
  11   4   0   74.52    2.25
  11   4   0   71.97    1.46
  11  -4   0   76.25    2.10
  -5  -7  -2   82.09    2.58
   5   7   2   84.82    2.54
   5  -7   2   83.25    2.10
   5   7   2   83.47    2.44
  -5   7  -2   81.65    1.95
  -5   7  -2   87.15    2.51
   5  -7   2   82.17    2.42
  -8  -5   8   70.64    2.27
   8  -5  -8   68.34    2.23
  -8   5   8   72.61    2.68
   9   4   3  105.96    2.99
   9   4   3  111.76    2.23
  -9  -4  -3  101.75    3.17
   9  -4   3  107.16    2.87
  13   1  -1    3.79    0.64
  13  -1  -1    3.22    0.54
  13   1  -1    3.22    0.50
 -13  -1   1    4.05    0.76
 -13   1   1    4.60    0.69
  12   4  -4    2.26    0.44
 -12  -4   4    2.14    0.67
 -12   4   4    1.55    0.55
  12  -4  -4    2.25    0.54
  12  -4  -4    2.33    0.60
   7   4   5  803.93   14.32
  -7  -4  -5  845.48   15.13
  -7   4  -5  851.69   14.13
   7  -4   5  816.79   14.34
   7   4   5  819.55   13.74
   7  -4   5  815.54   14.42
   7   4   5  836.92   13.95
   7   4   5  833.08   14.82
  -7   7   2   13.42    0.90
   7   7  -2   13.67    0.72
  -7   7   2   12.01    1.11
   7  -7  -2   13.70    0.82
   7  -7  -2   12.92    1.01
  -7  -7   2   12.20    0.97
  -4  -1  11    5.77    0.70
  -4   1  11    4.78    0.55
  -4  -1  11    4.48    0.55
  -4   1  11    4.58    0.70
  -4  -1  11    4.36    0.61
  -8   3  10  154.18    4.10
  -8   3  10  152.45    4.16
  -8  -3  10  162.31    3.26
  -8  -3  10  161.34    3.85
  -4  -7  -3    7.35    0.93
   4   7   3    6.14    0.81
   4  -7   3    6.07    0.54
   4   7   3    6.99    0.79
   4  -7   3    6.61    0.74
 -10   5   0  176.97    4.51
  10  -5   0  189.42    3.84
 -10  -5   0  180.36    4.51
 -10   5   0  179.90    3.67
  10   5   0  182.94    4.05
  10  -5   0  177.45    4.05
   1   8  -2   45.29    1.26
  -1  -8   2   46.10    1.60
   1   8  -2   40.70    1.54
  -1   8   2   43.40    1.72
   1  -8  -2   43.98    1.38
   1  -8  -2   43.88    1.50
   8  -6   1    1.71    0.58
  -8  -6  -1    2.31    0.85
   8  -6   1    3.26    0.57
  -8   6  -1    2.97    0.40
  -8   6  -1    2.34    0.63
   8   6   1    4.68    0.65
   8  -6   1    3.27    0.55
  -9   6   1   17.16    1.28
   9  -6  -1   14.97    1.04
   9  -6  -1   16.95    0.97
   9   6  -1   16.73    0.91
  -9   6   1   17.71    0.92
   7  -1 -11  134.25    3.24
  -7  -1  11  137.45    3.02
  -7   1  11  136.57    3.49
  -7   1  11  132.47    3.61
  -7   7   3   81.00    2.40
   7  -7  -3   81.13    2.16
  -7  -7   3   80.15    2.46
  -7   7   3   83.42    2.85
   7  -7  -3   80.94    2.47
 -12   4   3  432.66    8.25
  12  -4  -3  442.54    8.25
 -12  -4   3  438.83    8.54
  12  -4  -3  429.68    8.37
  12   4  -3  435.44    7.95
   4  -6   5  108.11    2.50
   4   6   5  111.17    2.95
   4   6   5  106.09    2.45
   4   6   5  102.40    2.27
   4   6   5   98.84    2.99
  -4  -6  -5  104.90    3.00
   4  -6   5  101.82    2.70
  -7  -5  -4   54.56    2.12
   7   5   4   53.00    1.87
   7   5   4   51.72    1.43
  -7   5  -4   52.34    1.71
   7  -5   4   50.66    1.81
   7   5   4   54.96    1.32
   7  -5   4   54.39    1.78
   7   5   4   51.39    1.96
   0  -8  -2   18.81    0.97
   0  -8  -2   17.76    0.92
   0   8   2   17.88    1.12
   0  -8   2   17.87    0.98
   0  -8   2   18.47    1.00
   0   8  -2   18.37    0.99
   2  -8  -2   24.97    1.02
   2  -8  -2   25.00    1.16
  -2   8   2   25.63    1.29
  -2  -8   2   26.95    1.24
   2   8  -2   25.13    0.87
   6   2   7   52.48    1.63
   6   2   7   52.15    2.01
   6  -2   7   48.30    1.83
   6   2   7   50.58    1.49
   3  -1   9   21.19    1.21
   3   1   9   22.04    0.98
   3   1   9   23.16    1.32
  -3   0  11   -0.22    0.51
  -3   0  11    0.04    0.43
  -3   0  11   -0.06    0.40
  -8  -5  -3   26.11    1.55
   8   5   3   27.73    1.40
   8  -5   3   28.44    1.35
   8  -5   3   29.20    1.29
  -8   5  -3   30.64    1.40
   8   5   3   30.42    0.86
   5   0   8  223.57    4.48
   5   0   8  214.99    4.94
  12   0  -9    0.02    0.32
  12   0  -9    0.31    0.39
  12  -4  -5    1.89    0.58
  12   4  -5    1.69    0.38
 -12  -4   5    3.09    0.67
 -12   4   5    1.20    0.57
   6  -7   1  137.96    3.09
   6   7   1  139.75    3.33
   6  -7   1  137.28    3.43
  -6   7  -1  140.65    3.65
   6  -7   1  137.12    3.17
  -6   7  -1  140.43    2.98
   6   7   1  138.91    3.49
  -6  -7  -1  138.01    3.59
   0  -6   7   20.37    1.04
   0  -6  -7   19.62    0.99
   0   6   7   20.37    1.23
   0  -6  -7   20.86    1.14
   9   3   4  362.77    6.33
   9  -3   4  350.21    6.84
  -9  -3  -4  363.97    7.64
   9   3   4  355.42    6.39
   9  -3   4  347.31    7.02
   9   3   4  349.08    7.19
   9  -6  -5   33.95    1.54
   9  -6  -5   34.86    1.36
  -9   6   5   33.04    1.56
  -9  -6   5   33.17    1.54
  -7  -7   1    0.60    0.52
   7  -7  -1    0.80    0.31
   7   7  -1    1.13    0.43
  -7   7   1    0.93    0.45
   7  -7  -1    0.62    0.41
  -7   7   1    0.40    0.62
   7  -7  -1    1.24    0.59
   0   2  10   23.10    1.18
   0   2  10   23.02    1.35
   0   2  10   22.31    1.02
   0  -2  10   22.92    1.13
   0  -2 -10   19.83    1.14
   0  -2  10   21.88    1.01
   0   4   9    7.33    0.82
   0  -4  -9    6.61    0.77
   0   4   9    7.29    0.89
   0   4   9    7.55    0.64
   0  -4   9    7.38    0.64
  -8   0  11   -0.45    0.58
  -2   8  -1  112.45    2.77
   2  -8   1  111.16    2.68
   2  -8   1  111.94    2.85
   2   8   1  115.52    2.45
  -2  -8  -1  106.93    2.76
   2   8   1  114.72    3.04
  11   5  -4   38.71    1.20
 -11   5   4   38.29    1.97
 -11   5   4   36.69    1.56
  11  -5  -4   35.01    1.43
 -11  -5   4   37.41    1.64
  11   5  -3    5.37    0.55
 -11  -5   3    5.47    0.81
 -11   5   3    5.87    0.93
  11  -5  -3    5.47    0.67
 -11   5   3    5.65    0.69
  -3  -8   1   59.51    1.94
   3   8  -1   61.80    2.03
  -3   8   1   62.79    2.00
   3  -8  -1   58.40    1.64
   3  -8  -1   60.21    1.95
   8   3   5  202.77    3.82
   8  -3   5  198.91    4.42
   9   0   5   -0.34    0.59
   9   0   5   -0.03    0.41
  -9   0  -5    0.06    0.61
   1   7   5  433.68    8.48
  -1  -7  -5  438.24    7.88
  -1  -7  -5  447.50    8.26
   1  -7   5  425.72    8.00
  -7   6   7   10.29    1.11
  -7   6   7   11.35    1.01
  -7  -6   7   11.88    0.93
   7  -6  -7   10.14    0.88
  10   0   4  149.93    3.87
 -10   0  -4  150.00    4.04
  10   0   4  160.13    3.41
   1   0  10  539.99    9.77
   1   0  10  498.71    9.14
   6  -7  -5  148.30    3.59
  -6   7   5  150.45    3.80
  -3   1  11    1.54    0.60
  -3  -1  11    1.48    0.45
  -3   1  11    1.42    0.42
  -3  -1  11    1.94    0.52
  -3  -1  11    1.17    0.50
  -3   1  11    1.28    0.53
  13   3  -4   76.39    2.10
  13  -3  -4   77.04    2.34
 -13  -3   4   78.25    2.50
  -3  -7  -4    0.22    0.63
   3   7   4   -0.20    0.57
   3   7   4    0.32    0.60
   3   7   4    0.30    0.44
   3  -7   4    0.07    0.45
  -3   7  -4    0.02    0.44
   6  -5   5  374.20    7.03
   6   5   5  371.19    6.48
  -6  -5  -5  369.59    7.68
  -6   5  -5  380.97    6.74
   6   5   5  363.99    6.66
   6   5   5  359.05    7.46
   6  -5   5  362.15    7.10
   6   5   5  365.56    7.21
  13   2  -7  346.99    6.16
 -13  -2   7  337.16    6.54
  13  -2  -7  329.02    6.40
  13   2  -7  326.80    5.93
  13  -2  -7  329.71    6.56
  10   4   2    0.19    0.25
  10  -4   2    0.69    0.50
  10  -4   2   -0.12    0.48
 -10  -4  -2    0.06    0.64
  10   4   2    0.59    0.54
  -9   4   9    2.21    0.74
  -9   4   9    2.70    0.69
  -9  -4   9    1.59    0.53
   5   1   8   26.22    1.42
   5  -1   8   25.04    1.35
   5   1   8   26.51    1.07
  -5  -1  -8   28.85    1.21
   5  -1   8   25.08    1.10
  -3   8   0  139.74    3.24
   3  -8   0  135.45    3.00
   3  -8   0  135.21    3.32
  -3  -8   0  135.52    3.31
   3   8   0  133.63    2.81
   3   8   0  137.43    3.42
 -12  -1   9   13.53    0.86
  12  -1  -9   13.30    0.89
  12  -1  -9   13.02    0.76
  12   1  -9   14.20    0.69
  12   1  -9   14.16    0.77
   1   8   2   -0.15    0.41
   1  -8   2    0.24    0.41
  -1   8  -2   -0.02    0.41
   1   8   2    0.17    0.60
   1  -8   2   -0.17    0.48
  -1   8  -2    0.25    0.45
  -1  -8  -2    0.31    0.56
   3  -8  -2  248.90    5.12
  -3   8   2  244.92    5.25
   3  -8  -2  253.05    4.73
  -3  -8   2  245.41    5.17
 -10   2  10   55.81    2.32
 -10   2  10   57.76    2.27
  10  -2 -10   57.64    1.90
 -10  -2  10   56.05    1.86
 -10  -2  10   61.26    1.61
  10   3   3  356.95    6.38
  10  -3   3  375.86    7.23
  10  -3   3  346.90    6.95
 -10  -3  -3  372.25    7.68
  10   3   3  366.73    7.30
  10   3   3  356.35    6.39
  13   0  -8   32.87    1.22
  13   0  -8   32.91    1.26
  -7   7   4  286.46    6.56
  -7   7   4  288.31    6.04
   7  -7  -4  290.24    5.59
   7  -7  -4  285.21    5.94
  -6  -4  -6  179.49    4.56
   6   4   6  178.53    3.55
   6  -4   6  183.96    4.05
   6  -4   6  178.68    4.01
   6   4   6  183.35    4.07
  -3   5  -7  191.03    4.09
   3   5   7  197.42    4.46
   3  -5   7  195.87    4.21
   3   5   7  201.48    3.92
 -13  -3   5  142.17    3.56
  13  -3  -5  139.62    3.50
  13  -3  -5  149.69    3.50
  13   3  -5  147.08    3.20
 -12   4   2   13.68    0.92
 -12  -4   2   12.57    1.20
  12  -4  -2   14.00    0.96
  12  -4  -2   14.86    1.06
  12   4  -2   13.08    0.88
  -8  -1  11   97.07    2.36
   8  -1 -11   94.45    2.57
  -8   1  11   94.54    2.94
  -8   1  11   97.50    2.88
  -9   5  -2   43.36    1.78
   9  -5   2   41.59    1.68
   9   5   2   46.43    1.76
   9  -5   2   44.41    1.65
  -4  -5   9  123.07    2.72
   4  -5  -9  122.49    3.09
  -4   5   9  124.90    3.50
  -4   5   9  120.74    3.48
 -14   0   4  228.94    4.90
  14   0  -4  227.76    4.61
  14   0  -4  228.29    4.86
   3  -7  -6  382.05    6.85
   3  -7  -6  373.56    7.22
  -3  -7   6  381.57    7.55
 -14   0   5    0.22    0.61
  14   0  -5   -0.27    0.42
  14   0  -5    0.40    0.45
  -5   5   9    1.25    0.67
  -5   5   9    1.49    0.60
  -5  -5   9    1.42    0.35
  -5  -5   9    1.49    0.59
   5  -5  -9    0.92    0.45
   9   1   5  103.85    3.02
   9  -1   5  101.19    2.94
  -9  -1  -5  103.41    2.48
   9   1   5  103.06    2.45
  -9  -1  -5  100.34    3.18
   9  -1   5  104.30    2.60
  -9   1  -5  100.17    3.10
  12  -3   0   33.76    1.51
  12  -3   0   30.59    1.39
  12   3   0   34.48    1.48
  12   3   0   33.78    0.99
 -12  -3   0   32.43    1.69
 -10  -1  -4  150.28    3.24
  10   1   4  146.98    3.79
 -10  -1  -4  146.39    3.99
 -10   1  -4  141.26    3.89
  10  -1   4  146.69    3.34
  10   1   4  147.35    3.18
  10  -1   4  145.36    3.75
  -8   0  -6   54.89    2.23
   8   0   6   56.91    1.70
   8   0   6   60.26    2.15
  -5  -2  11    2.97    0.68
  -5   2  11    4.04    0.71
  -5   2  11    3.23    0.68
   5  -2 -11    3.57    0.59
  -5  -2  11    3.05    0.46
  11   5  -5    6.81    0.47
 -11   5   5    6.70    0.78
 -11  -5   5    6.44    0.80
  11  -5  -5    6.47    0.69
  -1   3  10  202.39    4.92
  -1   3  10  204.72    4.61
  -1   3  10  205.93    4.26
  -1  -3  10  197.42    4.15
  11  -5  -2    3.32    0.57
 -11   5   2    3.04    0.54
 -11   5   2    3.35    0.82
 -11  -5   2    2.98    0.81
  11   5  -2    2.80    0.51
   1   1  10  239.37    5.33
   1  -1  10  237.16    4.78
   1  -1  10  239.71    5.12
  11   0 -10  334.07    6.37
  -6  -2  11    3.02    0.47
  -6   2  11    3.17    0.73
  -6   2  11    2.59    0.66
  13  -3  -3  338.78    6.85
  13   3  -3  348.41    6.66
 -13  -3   3  354.42    7.15
   2  -7  -6  129.03    2.87
  -2  -7   6  115.73    2.70
  -2  -7   6  123.59    3.27
   2  -7  -6  115.49    2.93
  -2   7   6  108.55    3.20
  -4   7   6    4.92    0.86
   4  -7  -6    4.14    0.62
  -4  -7   6    3.52    0.64
  -4   7   6    4.20    0.74
   4   7  -6    3.58    0.40
 -12   2  -1    8.24    0.89
  12  -2   1    8.29    0.77
 -12  -2  -1    8.18    0.98
  12  -2   1    8.59    0.88
  12   2   1    9.31    0.88
  12   2   1    7.90    0.59
  11   0   3    0.15    0.45
 -11   0  -3    0.05    0.62
  11   0   3    0.34    0.58
   7   3   6   19.69    0.84
   7   3   6   17.66    1.25
   7  -3   6   20.40    1.18
   7   3   6   21.85    1.07
   4  -3   8   16.55    1.00
   4   3   8   16.58    0.82
   4  -3   8   14.28    0.91
  -4  -3  -8   16.31    1.26
   4   3   8   17.70    1.02
   4   3   8   16.14    1.20
 -10   5   7   21.78    1.55
 -10   5   7   22.39    1.34
  10  -5  -7   22.69    1.25
 -10  -5   7   23.85    1.26
  10  -5  -7   20.95    1.04
  -3  -5   9   26.42    1.05
   3  -5  -9   25.79    1.24
  -3   5   9   25.10    1.42
  13  -2  -1  216.35    4.68
  13   2  -1  222.97    4.80
  13   2  -1  229.23    4.21
 -13   2   1  219.13    4.73
 -13  -2   1  227.90    5.15
 -12  -4   6    0.53    0.54
 -12   4   6    0.45    0.76
  12   4  -6    0.50    0.29
  12  -4  -6    0.69    0.51
 -12   4   6   -0.05    0.58
  -1   8   3   72.22    2.32
   1  -8  -3   68.91    2.02
  -1  -8   3   67.32    2.08
  13   1  -8    4.30    0.50
  13  -1  -8    4.98    0.55
  13  -1  -8    5.17    0.63
 -13  -1   8    4.44    0.61
  13   1  -8    4.23    0.49
   2  -8  -3    7.91    0.71
   2  -8  -3    7.06    0.69
  -2  -8   3    7.30    0.74
   2   8  -3    8.14    0.53
  -2   8   3    8.46    0.86
  -2  -3  -9   53.55    2.08
   2   3   9   52.03    1.79
   2   3   9   51.24    2.10
   2  -3   9   51.52    1.72
   2  -3   9   53.35    1.69
   2   3   9   55.19    1.65
   1  -5   8  333.51    6.46
  -1  -5  -8  354.66    6.99
   1   5   8  339.98    7.32
   1   5   8  337.03    6.96
   1   5   8  348.23    6.40
  -2   0  11   -0.12    0.37
  -2   0  11    0.22    0.40
  -2   0  11    0.45    0.53
   9  -3 -10    6.40    0.72
  -9   3  10    6.68    0.90
  -9   3  10    7.86    0.99
  -9  -3  10    6.29    0.50
  -9  -3  10    6.98    0.74
  -4   2  11    6.22    0.82
  -4   2  11    6.63    0.63
  -4  -2  11    6.14    0.57
  -6  -5   9   14.34    1.08
  -6   5   9   12.30    1.21
   6  -5  -9   14.76    0.99
  -6   5   9   13.74    1.12
  -6  -5   9   14.13    0.68
  14  -1  -4   39.98    1.58
  14   1  -4   39.98    1.31
  14  -1  -4   40.39    1.50
  14   1  -4   37.39    1.51
 -14  -1   4   40.84    1.72
  -5  -4  10   12.71    0.70
  -5   4  10   14.33    1.16
  -5   4  10   14.24    1.11
   5  -4 -10   13.40    0.94
  14  -1  -5   14.81    0.91
  14   1  -5   14.62    0.90
  14  -1  -5   14.61    0.79
 -14  -1   5   14.14    1.12
  14  -1  -5   13.94    0.93
  14   1  -5   14.07    0.77
  -7   7   0  179.84    4.49
   7  -7   0  178.62    4.23
   7  -7   0  184.51    3.67
   7   7   0  187.56    3.99
  -7  -7   0  173.23    4.30
  -7   7   0  188.64    3.84
   7  -7   0  180.36    3.89
   9  -6   0   29.13    1.26
   9   6   0   28.93    1.27
   9  -6   0   28.67    1.44
  -9   6   0   29.91    1.61
  -9   6   0   30.47    1.12
   8   1   6    4.17    0.77
   8  -1   6    4.09    0.57
   8  -1   6    4.83    0.74
  -8  -1  -6    3.44    0.79
   8   1   6    4.78    0.54
  14   0  -3    0.04    0.48
  14   0  -3    0.06    0.44
 -14   0   3    0.17    0.57
  -7   2  11  779.83   14.11
  -7  -2  11  778.32   13.33
  -7   2  11  793.30   14.27
  14   0  -6   43.21    1.54
  14   0  -6   43.19    1.46
  11  -1 -10    0.15    0.42
  11   1 -10    0.44    0.37
 -11  -1  10    0.67    0.46
  -4  -4  10   66.03    1.80
  -4   4  10   66.83    2.34
  -4   4  10   64.15    2.29
   4  -4 -10   65.96    2.10
 -13   0   0  149.38    3.92
  13   0   0  157.90    3.84
  13   0   0  155.40    3.41
   3   8   1   13.28    1.03
  -3  -8  -1   12.97    0.91
   3  -8   1   13.71    0.99
   3  -8   1   13.94    0.82
   3  -8   1   15.36    0.74
  -3   8  -1   12.82    0.86
   3  -2   9    4.92    0.60
   3   2   9    7.03    0.68
  -3  -2  -9    6.66    0.76
   3   2   9    6.53    0.85
   3  -2   9    7.23    0.77
   3   2   9    6.24    0.58
   4   8  -1  488.52    8.62
   4  -8  -1  467.61    8.93
   4  -8  -1  480.18    8.38
  -4   8   1  474.14    8.85
  -4  -8   1  485.63    9.00
  -9   5   8   15.95    1.34
   9  -5  -8   15.17    1.01
  -9  -5   8   13.90    1.00
  -9   5   8   14.42    1.14
  -6   4  10   62.69    2.31
  -6   4  10   63.80    2.40
   6  -4 -10   59.78    1.98
  -6  -4  10   63.48    2.18
  -6  -4  10   61.82    1.63
   3   6   6   64.35    2.36
   3  -6   6   64.56    2.04
  -3   6  -6   66.38    1.89
   3   6   6   67.77    2.26
  -3  -6  -6   64.59    2.27
   3   6   6   70.36    1.76
  -9   0  11   -0.13    0.45
  -9   0  11    0.42    0.61
   9   0 -11    0.07    0.42
   1  -7  -6  256.97    5.14
   1  -7  -6  256.94    5.15
  -1   7   6  254.43    5.61
  -1  -7   6  260.07    5.52
  -1  -7   6  244.20    4.96
   3  -4   8    1.21    0.45
   3   4   8    0.77    0.53
  -3  -4  -8    0.64    0.62
   3   4   8    1.23    0.58
   3   4   8    1.02    0.39
   3  -4   8    0.26    0.47
   0  -8   3   72.18    2.16
   0   8   3   73.37    2.39
   0  -8   3   73.50    2.06
   0  -8  -3   75.37    2.15
   0  -8  -3   72.03    2.01
 -11   1  -3   21.99    1.34
  11  -1   3   22.47    1.31
 -11  -1  -3   23.91    1.48
  11   1   3   23.36    1.00
  11  -1   3   22.29    1.09
  13  -3  -6  174.78    4.09
  13  -3  -6  177.44    3.97
  13   3  -6  184.06    3.65
 -13  -3   6  175.52    4.11
  -3  -8   3   69.56    2.18
   3  -8  -3   72.26    1.84
  -3   8   3   69.85    2.27
   3  -8  -3   69.21    2.11
   2   8   2   79.38    2.45
  -2   8  -2   79.40    2.03
   2  -8   2   79.22    2.25
  -2  -8  -2   80.11    2.33
  -2   8  -2   79.01    2.11
   2  -8   2   74.05    2.15
  12  -3  -8   82.82    2.47
 -12   3   8   86.81    2.90
 -12   3   8   82.67    3.07
 -12  -3   8   82.95    2.43
  12   3  -8   88.47    1.88
  12  -3  -8   84.19    2.29
  -5   7   6   76.41    2.73
   5  -7  -6   72.55    2.22
  -5  -7   6   67.79    2.27
  -5   7   6   73.72    2.48
   4  -8  -2    0.30    0.36
   4  -8  -2    0.32    0.54
  -4  -8   2    0.25    0.53
   4   8  -2    0.26    0.34
  -4   8   2    0.49    0.52
 -11  -3   9  299.13    5.94
 -11   3   9  295.99    6.76
  11  -3  -9  281.75    5.93
  -2  -1  11   19.44    0.96
  -2  -1  11   20.73    1.12
  -2   1  11   17.49    1.07
  -2   1  11   19.84    1.27
  -2   1  11   19.07    0.99
  -4   6   8    1.91    0.72
  -4   6   8    1.91    0.62
   4  -6  -8    1.37    0.49
  -4  -6   8    1.93    0.62
  -4  -6   8    1.99    0.42
   5   5   6  163.45    4.19
   5   5   6  164.31    3.94
   5  -5   6  169.30    3.72
  -5  -5  -6  171.33    4.34
   5  -5   6  167.45    3.83
   5   5   6  171.06    3.38
   1   6   7    4.97    0.75
   1  -6   7    5.58    0.67
  -1  -6  -7    5.39    0.61
  -1  -6  -7    5.08    0.76
  11  -3   2    1.18    0.58
  11   3   2    1.63    0.60
 -11  -3  -2    0.89    0.74
  11   3   2    0.47    0.32
  11  -3   2    0.83    0.52
  -9   6   6   31.64    1.81
  -9   6   6   32.44    1.59
   9  -6  -6   33.44    1.33
   9  -6  -6   33.05    1.51
  -9  -6   6   34.10    1.55
   7   6   3    2.78    0.28
  -7   6  -3    3.14    0.59
   7  -6   3    2.58    0.51
   7  -6   3    2.74    0.63
  -7  -6  -3    2.16    0.76
   7   6   3    2.67    0.66
   7   6   3    2.14    0.60
 -14   1   3    4.38    0.68
  14  -1  -3    2.97    0.58
 -14  -1   3    3.94    0.74
  14  -1  -3    4.06    0.67
  14   1  -3    4.26    0.64
  14   1  -3    3.54    0.52
   3  -6  -8   30.92    1.19
   3  -6  -8   31.86    1.35
  -3  -6   8   29.04    1.11
  -2  -5   9   16.01    0.85
  -2   5   9   17.73    1.19
   2  -5  -9   15.98    0.98
 -14  -1   6   44.04    1.71
  14  -1  -6   41.13    1.54
  14  -1  -6   42.45    1.52
  14   1  -6   44.79    1.36
  14   1  -6   43.39    1.51
  -2  -7  -5    0.30    0.39
   2  -7   5    0.47    0.50
   2   7   5    0.25    0.61
  -2  -7  -5    0.35    0.58
  -5   6   8  128.56    3.80
   5  -6  -8  136.65    3.37
  -5   6   8  137.59    3.74
  -5  -6   8  134.84    3.61
 -13   1   0  107.99    3.06
  13  -1   0  110.03    2.77
 -13  -1   0  115.37    3.30
  13   1   0  110.76    2.58
  13   1   0  110.34    3.02
  13  -3  -2   17.01    1.11
 -13  -3   2   18.69    1.37
  13  -3  -2   16.41    1.07
  13   3  -2   16.94    1.03
   6   6   4    0.40    0.54
   6  -6   4    2.09    0.62
   6   6   4    1.88    0.30
  -6  -6  -4    1.94    0.72
   6   6   4    1.83    0.64
   6  -6   4    1.88    0.49
  -6   6  -4    1.81    0.48
   4   8   0   80.18    2.23
  -4  -8   0   79.51    2.36
   4  -8   0   77.02    2.00
   4  -8   0   79.75    2.38
   4   8   0   81.59    2.46
   4   8   0   73.94    1.85
   4  -8   0   81.78    2.02
  -4   8   0   81.28    2.24
  -3  -4  10   27.41    1.10
   3  -4 -10   29.75    1.32
  -3   4  10   29.45    1.57
 -11  -4   8  116.82    3.07
  11  -4  -8  118.32    3.09
  11  -4  -8  114.17    2.81
 -11   4   8  112.98    3.37
 -11   4   8  116.04    3.68
  -3   2  11   12.34    0.82
  -3  -2  11   11.84    0.76
  -3   2  11   12.88    1.01
  -8   6   7    9.11    0.94
  -8   6   7   10.58    1.15
   8  -6  -7    8.85    0.83
  -8  -6   7    9.95    0.90
  -9  -1  11   14.59    0.96
   9  -1 -11   12.89    0.90
  -9   1  11   15.11    1.18
  -9  -1  11   14.32    0.80
  -9   1  11   14.41    1.19
   5   2   8  350.09    7.21
  -5  -2  -8  342.19    7.39
   5   2   8  342.39    6.39
   5  -2   8  347.97    6.90
  10  -6  -3    1.90    0.63
  10  -6  -3    0.84    0.46
 -10   6   3    1.36    0.51
 -10   6   3    2.19    0.80
 -10  -6   3    1.81    0.65
  10   6  -3    1.86    0.39
 -12  -2   9  339.89    6.40
  12  -2  -9  322.91    6.38
  12  -2  -9  312.62    6.09
  12   2  -9  319.89    5.88
  12   2  -9  321.02    5.71
   7   0   7    0.12    0.40
   7   0   7   -0.10    0.59
  10  -5   1    4.96    0.66
 -10   5  -1    3.36    0.75
 -10  -5  -1    4.83    0.88
  10   5   1    3.30    0.62
  -7  -5   9    4.62    0.74
   7  -5  -9    4.26    0.67
  -7   5   9    2.70    0.69
  -7   5   9    3.39    0.82
   7  -7  -5   -0.09    0.52
  -7   7   5   -0.20    0.59
  11   4   1    1.31    0.54
 -11   4  -1    2.54    0.36
  11  -4   1    2.25    0.57
  11  -4   1    2.23    0.58
 -11  -4  -1    2.86    0.79
  11  -5  -6   13.52    0.91
 -11   5   6   12.42    1.06
 -11  -5   6   14.02    1.03
 -11   5   6   13.41    1.33
  -7   4  10    5.65    0.89
  -7  -4  10    6.57    0.78
  -7  -4  10    5.84    0.48
  -7   4  10    5.49    0.83
   7  -4 -10    4.98    0.66
 -11  -5   1   25.54    1.55
  11   5  -1   25.71    1.20
 -11   5   1   23.94    1.09
 -11   5   1   21.54    1.50
  11  -5  -1   26.53    1.28
   5  -7   3  108.79    2.89
  -5   7  -3  113.30    2.88
   5   7   3  101.49    2.97
  -5  -7  -3  112.87    3.12
   5   7   3  109.99    3.06
   5   7   3  105.85    2.20
   5  -7   3  114.25    2.61
  12   4  -1  333.92    6.61
  12  -4  -1  342.88    6.77
 -12   4   1  348.00    6.46
  12  -4  -1  331.65    6.76
 -12  -4   1  325.18    7.10
  -1  -4  -9    0.74    0.56
   1   4   9    1.11    0.56
   1   4   9    0.81    0.43
   1  -4   9    1.43    0.45
   1   4   9    0.83    0.62
  -8   2  11   18.67    1.30
  -8  -2  11   18.88    1.12
   8  -2 -11   20.88    1.12
  -8  -2  11   19.62    0.90
  -8   2  11   20.61    1.33
  10  -6  -4   73.88    2.44
 -10  -6   4   76.91    2.49
  10  -6  -4   73.78    2.20
 -10   6   4   78.32    2.92
 -10   6   4   75.43    2.37
  10   6  -4   79.93    1.78
   6   7   2    9.30    0.92
  -6  -7  -2   11.04    1.10
  -6   7  -2   10.45    0.92
   6  -7   2   10.46    0.75
   6   7   2    9.41    0.83
  -6   7  -2    9.79    0.60
   6  -7   2    7.06    0.78
   9   2   5  343.86    6.12
   9  -2   5  328.47    6.44
   9  -2   5  332.73    6.84
  -9  -2  -5  335.86    7.27
   5  -4   7  373.64    7.15
   5   4   7  379.74    6.76
  -5  -4  -7  371.26    7.83
   5  -4   7  370.11    7.17
   5   4   7  373.04    7.24
   8   6   2   13.95    1.01
  -8  -6  -2   14.25    1.21
  -8   6  -2   13.80    1.04
   8  -6   2   12.48    0.98
   8  -6   2   14.01    0.89
  -1  -8  -3  299.83    5.95
   1  -8   3  288.05    5.91
   1   8   3  301.70    6.24
   1  -8   3  301.20    5.87
  10  -2   4   39.12    1.51
  10  -2   4   42.10    1.74
 -10  -2  -4   36.75    1.88
  10   2   4   41.48    1.31
   8   7  -3   42.81    1.18
  -8   7   3   44.63    2.06
  -8   7   3   40.06    1.61
   8  -7  -3   39.79    1.47
   8  -7  -3   40.20    1.71
  12   0   2  466.44    8.52
 -12   0  -2  478.44    9.32
   8  -7  -2   57.44    2.10
   8  -7  -2   61.70    1.86
  -8   7   2   59.22    2.36
   8   7  -2   60.45    1.65
  -8   7   2   60.73    1.93
   1  -2  10   10.12    0.76
   1   2  10   10.00    0.72
   1  -2  10   10.44    0.84
   1   2  10    9.84    0.81
   1   2  10    9.31    0.94
   4  -8  -3   91.85    2.58
  -4   8   3   97.61    2.74
  -4  -8   3   91.39    2.65
   4  -8  -3   93.60    2.13
   2  -6  -8    1.46    0.48
  -2   6   8    0.90    0.57
   2  -6  -8    1.21    0.47
  -2  -6   8    1.59    0.47
   6  -3   7  108.90    2.86
   6   3   7  116.47    2.61
   6   3   7  113.72    3.31
   6  -3   7  116.29    3.05
  -6  -3  -7  115.95    3.49
 -10   6   2    8.42    0.73
  10  -6  -2    8.36    0.91
 -10   6   2    9.03    1.08
 -10  -6   2    6.94    0.91
  10  -6  -2    7.74    0.73
  10   6  -2    6.83    0.61
   0  -7  -6   75.64    2.25
   0  -7  -6   74.33    2.07
   0   7   6   73.10    2.46
   0  -7   6   79.84    2.42
   0  -7   6   70.12    2.06
   7   1   7    0.31    0.37
  -7  -1  -7    0.37    0.60
   7  -1   7    0.22    0.40
   7   1   7    0.68    0.57
   7  -1   7    0.82    0.61
   6  -6  -8   43.29    1.67
  -6  -6   8   42.53    1.81
  -6   6   8   42.33    2.06
 -14   0   2   96.56    2.80
  14   0  -2   94.54    2.42
  14   0  -2   89.60    2.65
 -10   4   9   29.97    1.75
 -10  -4   9   26.77    1.32
  13   2  -8   15.42    0.74
  13   2  -8   16.71    0.77
  13  -2  -8   16.28    0.94
 -13  -2   8   16.50    1.00
  13  -2  -8   16.40    1.01
  14   0  -7    0.62    0.44
  14   0  -7    0.46    0.39
   0   3  10  147.17    3.97
   0   3  10  147.07    3.33
   0  -3  10  148.76    3.34
   0   3  10  145.52    3.60
  -6   7   6   38.97    2.00
  -6   7   6   38.57    1.73
   6  -7  -6   41.12    1.65
   4   0   9   -0.44    0.57
   4   0   9    0.19    0.38
   5   6   5    4.64    0.79
   5  -6   5    5.76    0.65
   5   6   5    3.96    0.77
   5   6   5    5.19    0.44
   5  -6   5    3.67    0.64
  -5  -6  -5    4.36    0.77
  14  -2  -4   10.03    0.87
  14   2  -4    9.46    0.79
  14  -2  -4   10.35    0.87
 -14  -2   4    9.01    1.09
  14   2  -4   11.13    0.60
  -4  -7  -4  147.20    3.69
   4   7   4  137.39    3.68
   4  -7   4  144.70    3.47
   4   7   4  139.83    3.64
  14  -2  -5   63.09    2.03
  14  -2  -5   62.37    2.03
  14   2  -5   62.70    1.54
  14   2  -5   61.08    1.88
 -14  -2   5   62.02    2.19
  -1   0  11   -0.14    0.52
  -1   0  11   -0.16    0.37
 -12   4   7  118.40    3.39
  12   4  -7  119.24    2.33
  12  -4  -7  113.32    3.09
 -12   4   7  111.79    3.74
 -12  -4   7  117.38    3.12
  12  -4  -7  111.21    2.87
   8   2   6   45.27    1.92
   8  -2   6   44.58    1.82
   8   2   6   46.04    1.41
  -8  -2  -6   47.03    2.09
   8  -2   6   44.24    1.60
  12   1   2  731.41   13.26
  12  -1   2  738.71   13.27
 -12  -1  -2  733.07   13.60
  12  -1   2  732.02   12.82
  12   1   2  730.58   12.57
 -12   1  -2  730.18   13.38
 -11   2  10   78.47    2.77
 -11  -2  10   73.32    2.20
  11  -2 -10   79.88    2.32
 -11   2  10   78.67    2.87
   8  -7  -4   87.11    2.33
  -8   7   4   88.94    2.66
   8  -7  -4   87.93    2.65
  -8   7   4   91.65    3.12
  -2  -8   4  103.04    2.84
  -2   8   4  107.94    3.04
   2  -8  -4  106.12    2.74
   2  -8  -4  109.63    2.58
  -2  -4  10    1.99    0.45
  -2   4  10    2.41    0.67
   2  -4 -10    1.89    0.51
  -7  -7  -1    7.03    1.01
   7   7   1    7.41    0.74
  -7   7  -1    6.65    0.55
  -7   7  -1    7.29    0.86
   7  -7   1    7.36    0.82
   7  -7   1    6.75    0.65
  -3  -8  -2   17.35    1.19
  -3   8  -2   16.46    0.89
   3  -8   2   15.02    1.01
   3  -8   2   16.08    0.94
   2   0  10  352.43    7.16
 -13   3   7  144.01    3.93
  13  -3  -7  143.93    3.52
  13  -3  -7  144.37    3.39
  13   3  -7  136.12    2.94
 -13  -3   7  148.89    3.57
  11   2   3  112.09    2.48
  11  -2   3  104.95    3.02
 -11  -2  -3  109.56    3.37
  11  -2   3  100.42    2.75
  11   2   3  107.38    3.07
 -10   6   5   55.15    2.48
  10  -6  -5   62.19    2.14
 -10   6   5   60.58    2.15
  10  -6  -5   61.23    1.93
 -10  -6   5   61.48    2.17
   8  -7  -1   16.47    1.11
   8  -7  -1   18.97    0.77
  -8   7   1   18.43    1.31
  -8   7   1   17.44    0.96
   8   7  -1   17.79    0.94
   8  -7  -1   19.44    1.00
  -8  -7   1   18.63    1.20
  -5  -8   2  182.16    4.19
  -5   8   2  182.29    4.65
   5  -8  -2  176.51    3.48
   5  -8  -2  182.13    4.18
  -5   8   2  178.85    4.10
   5   8  -2  184.82    3.63
   1  -5  -9    3.74    0.66
   1  -5  -9    4.28    0.62
  -1  -5   9    4.16    0.55
  -1   5   9    4.47    0.74
 -10   3  10   50.68    2.25
 -10   3  10   51.86    2.16
 -10  -3  10   50.19    1.82
  10  -3 -10   54.01    1.89
  14  -1  -2   27.64    1.36
  14   1  -2   27.98    1.11
 -14  -1   2   28.84    1.50
  14   1  -2   24.75    1.29
  14  -1  -2   27.45    1.24
 -14   1   2   26.88    1.36
  -4   8  -1   53.99    1.67
   4  -8   1   55.81    1.57
   4   8   1   55.55    1.87
   4  -8   1   51.19    1.86
  -4  -8  -1   50.72    1.90
   4  -8   1   53.34    1.65
   4   8   1   52.32    1.96
   1  -8  -4  120.85    2.92
   1  -8  -4  122.71    2.91
  -1   8   4  124.63    3.33
  -1  -8   4  117.98    3.11
   5   8  -1  322.64    6.02
   5  -8  -1  319.73    5.79
  -5   8   1  323.38    6.90
   5  -8  -1  310.55    5.95
   5  -8  -1  315.56    6.45
  -5   8   1  325.14    6.28
  -5  -8   1  313.64    6.44
  -3  -8   4    1.78    0.56
   3  -8  -4    1.01    0.48
  -3   8   4    1.65    0.59
   3  -8  -4    1.46    0.54
  14  -1  -7   40.03    1.49
 -14  -1   7   37.42    1.52
  14   1  -7   40.00    1.38
  14  -1  -7   38.29    1.45
  14   1  -7   38.40    1.28
  -2   2  11  257.60    5.59
  -2  -2  11  260.58    5.16
  -2   2  11  274.30    5.97
 -10   0  11    0.29    0.64
  10   0 -11    0.10    0.43
  -8  -4  10   65.64    2.27
   8  -4 -10   66.25    2.17
  -8   4  10   64.53    2.43
  -8   4  10   66.86    2.53
   4   1   9  197.76    4.71
   4   1   9  193.60    4.07
   4  -1   9  198.98    4.55
  -1  -1  11  248.19    5.24
  -1   1  11  247.35    4.97
  -1   1  11  246.10    5.47
  -1   1  11  247.93    5.18
  -1  -1  11  239.47    4.91
  -8   5   9    0.54    0.67
   8  -5  -9    0.05    0.47
  -8  -5   9   -0.44    0.53
  -8   5   9    0.29    0.58
  -5   3  11  153.06    3.85
  -5  -3  11  147.28    3.19
   5  -3 -11  144.27    3.56
  -5   3  11  151.21    3.90
  14   2  -3  211.95    3.92
 -14  -2   3  203.43    4.78
  14  -2  -3  200.51    4.49
  14   2  -3  196.19    4.42
  14  -2  -3  205.11    4.62
  13   0  -9    0.22    0.37
  13   0  -9    0.10    0.40
   2  -5   8   56.43    1.82
   2   5   8   57.22    1.67
   2   5   8   56.34    2.03
  -2  -5  -8   57.40    2.15
   2   5   8   50.66    2.20
  14  -2  -6  176.58    3.96
  14   2  -6  174.94    3.36
  14   2  -6  169.48    3.67
 -14  -2   6  169.32    4.04
  14  -2  -6  165.22    3.89
  -6   3  11  240.57    5.43
   6  -3 -11  231.53    5.01
  -6  -3  11  226.54    4.55
  13   2   0    3.07    0.44
 -13  -2   0    2.86    0.71
  13  -2   0    3.50    0.69
  13   2   0    3.31    0.69
 -13   2   0    3.56    0.71
  13  -2   0    2.85    0.61
  -1   6   8  754.20   13.77
  -1  -6   8  747.86   13.04
   1  -6  -8  763.84   13.24
   1  -6  -8  764.05   13.34
   9   6   1   68.28    2.15
   9  -6   1   65.99    2.06
  -9   6  -1   67.19    2.39
   9  -6   1   66.84    2.23
  -9   2  11   50.14    2.15
   9  -2 -11   49.54    1.79
  -9  -2  11   51.73    1.85
  -9   2  11   47.38    2.08
  -9  -2  11   50.71    1.50
  12  -3   1   10.00    0.87
  12  -3   1   13.29    1.01
  12   3   1   11.20    0.61
 -12  -3  -1   10.20    1.11
  12   3   1   11.93    0.99
   2  -1  10    5.87    0.62
   2  -1  10    6.32    0.79
   2   1  10    7.10    0.86
   2   1  10    6.73    0.61
   4  -5   7   18.56    1.06
   4   5   7   18.79    0.85
  -4  -5  -7   19.12    1.31
   4   5   7   18.07    1.16
  10  -6  -1   33.06    1.61
 -10   6   1   34.80    1.31
  10  -6  -1   38.20    1.51
  10   6  -1   38.61    1.43
 -10  -6   1   35.62    1.79
 -10   6   1   32.78    1.77
  -2  -8  -3    1.15    0.71
   2  -8   3    0.96    0.53
   2  -8   3    1.30    0.51
  12   0 -10  259.97    5.20
  13  -3  -1   76.04    2.35
  13   3  -1   74.56    2.30
 -13  -3   1   75.96    2.67
  13  -3  -1   80.40    2.49
   9   4   4   20.69    0.79
   9   4   4   22.77    1.32
   9  -4   4   19.34    1.17
   7  -6  -8    9.69    0.85
  -7   6   8    7.63    1.06
  -7  -6   8    9.21    0.88
  -5   8   3   38.64    1.61
   5  -8  -3   37.75    1.56
  -5  -8   3   35.93    1.57
  -5   8   3   33.95    1.82
 -10   1  11   97.91    3.17
 -10  -1  11   98.87    2.40
 -10   1  11   95.83    3.10
  10  -1 -11   94.29    2.59
 -10  -1  11   95.99    2.61
  -4   3  11  170.15    4.22
  -4  -3  11  166.74    3.61
   4  -3 -11  180.51    4.01
   0  -8   4   80.05    2.21
   0  -8   4   81.29    2.42
   0  -8  -4   84.07    2.20
   0  -8  -4   80.30    2.29
   2  -6   7  393.93    7.36
  -2  -6  -7  391.10    7.75
   2   6   7  382.68    8.03
   2   6   7  381.75    7.74
   8   4   5  123.69    2.60
   8  -4   5  122.06    3.17
  -8   4  -5  122.23    2.97
   8   4   5  117.96    3.37
 -10  -5   8    0.23    0.53
 -10   5   8    0.94    0.72
  10  -5  -8   -0.14    0.46
 -10   5   8   -0.34    0.60
  -4  -8   4    2.38    0.61
   4  -8  -4    2.46    0.59
  -4   8   4    2.87    0.69
   8  -5   4   28.85    1.34
  -8   5  -4   28.41    1.31
   8  -5   4   27.82    1.37
   8   5   4   28.93    1.50
   8   5   4   29.92    0.91
  -8  -5  -4   28.02    1.59
   5  -8   0   17.12    1.13
  -5   8   0   18.98    1.01
   5  -8   0   16.98    0.84
   5   8   0   16.52    0.96
   5  -8   0   16.39    0.85
  -5   8   0   18.16    1.26
  -7   3  11    7.23    0.92
   7  -3 -11    6.37    0.75
  -7   3  11    5.83    0.89
  -7  -3  11    6.86    0.57
  13  -1  -9    8.18    0.74
 -13  -1   9    7.28    0.67
  13   1  -9    8.94    0.61
  13  -1  -9    7.70    0.66
  13   1  -9    8.64    0.64
   6   0   8  456.87    8.45
   6   0   8  485.85    9.17
   3   7   5   66.89    2.47
  -3  -7  -5   75.18    2.44
   3  -7   5   73.71    2.20
   3   7   5   73.81    2.43
   1   7   6   16.08    1.16
  -1  -7  -6   18.68    0.94
  -1  -7  -6   17.00    1.10
   1  -7   6   17.85    0.99
  -3  -3  -9   78.14    2.70
   3  -3   9   77.41    2.21
   3   3   9   80.71    2.11
   3  -3   9   75.55    2.28
   3   3   9   82.29    2.71
   3   3   9   79.91    2.31
 -11   5   7   -0.33    0.62
 -11   5   7    0.07    0.76
  11  -5  -7   -0.14    0.42
 -11  -5   7    0.18    0.54
  13  -4  -4   38.28    1.66
 -13   4   4   39.75    1.68
 -13  -4   4   42.45    1.82
  13  -4  -4   40.96    1.62
  13   4  -4   39.04    1.39
   7   2   7   11.22    0.72
   7  -2   7   12.13    0.99
   7  -2   7   11.22    0.82
   7   2   7   10.62    1.02
 -11   5   0    1.81    0.71
  11   5   0    0.84    0.53
  11  -5   0    0.93    0.53
 -11  -5   0    0.12    0.76
 -11   5   0    0.59    0.36
   9  -6  -7    9.71    0.90
  -9   6   7    8.07    0.92
  -9   6   7    7.78    1.08
  -9  -6   7    9.66    0.92
   9   5   3    5.82    0.79
  -9   5  -3    5.86    0.75
   9  -5   3    5.33    0.72
   9  -5   3    5.28    0.72
   9   5   3    5.35    0.39
  12   1 -10   83.85    2.17
 -12  -1  10   79.91    2.22
  12  -1 -10   80.42    2.30
  10   4   3    2.52    0.36
  10  -4   3    2.49    0.64
  10  -4   3    2.33    0.61
 -10  -4  -3    2.36    0.78
  10   4   3    2.59    0.69
   7  -7  -6   -0.27    0.54
  -7   7   6    0.79    0.72
  -7   7   6   -0.21    0.57
   4   6   6  639.35   12.26
  -4  -6  -6  672.00   12.29
   4   6   6  667.59   12.00
   4   6   6  647.91   11.15
   4  -6   6  663.63   11.74
  12  -5  -4   50.73    1.81
  12   5  -4   52.48    1.56
 -12   5   4   48.88    2.33
 -12   5   4   51.91    1.93
  12  -5  -4   49.30    1.96
   8  -7  -5  172.63    3.81
   8  -7  -5  172.65    4.15
   7  -5   5    2.52    0.57
   7   5   5    2.32    0.63
   7   5   5    1.55    0.62
  -7  -5  -5    2.70    0.80
   7  -5   5    2.48    0.59
  -7   5  -5    2.35    0.48
   7   5   5    2.50    0.36
 -13   4   5   88.07    2.82
  13  -4  -5   89.78    2.73
  13   4  -5   92.14    2.30
   3  -7  -7   10.74    0.71
  -3  -7   7    9.91    0.96
   3  -7  -7    9.27    0.81
  -3   7   7   10.56    1.02
  -4  -7   7   36.32    1.68
   4  -7  -7   38.17    1.54
 -12   4   0   11.81    0.73
  12  -4   0   11.77    0.96
  12   4   0   10.58    0.92
 -12  -4   0   11.59    1.18
  12  -4   0   11.86    0.96
   8  -7   0    8.36    0.72
   8   7   0    8.62    0.75
  -8  -7   0    8.17    1.00
  -8   7   0    8.07    0.65
  -8   7   0    7.56    0.93
   8  -7   0    9.04    0.92
  13   0   1    0.61    0.50
 -13   0  -1   -0.22    0.64
  -1   4  10  111.46    2.76
  -1  -4  10  106.13    2.63
  -1   4  10  110.08    3.10
  12  -5  -3   10.29    0.97
  12   5  -3   12.43    0.79
 -12  -5   3   10.84    1.06
 -12   5   3   11.23    0.88
 -12   5   3   12.15    1.24
  12  -5  -3   12.28    0.93
  12  -2   2  192.73    4.55
 -12   2  -2  185.37    4.55
 -12  -2  -2  202.93    4.98
  12  -2   2  196.05    4.28
  12   2   2  184.88    4.51
  12   2   2  194.44    3.86
   6   1   8  170.35    4.30
   6  -1   8  180.05    4.26
   6   1   8  171.86    3.70
   6  -1   8  173.31    3.81
 -13   4   3   56.29    1.93
  13  -4  -3   49.66    1.87
 -13  -4   3   54.69    2.15
  13   4  -3   52.98    1.72
  13  -4  -3   50.76    1.96
  14   0  -1    0.09    0.55
  14   0  -1    0.77    0.47
 -14   0   1   -0.10    0.66
  -3   3  11    0.25    0.57
  -3  -3  11    0.32    0.38
 -10  -6   6   14.19    1.05
 -10   6   6   13.72    1.12
  10  -6  -6   14.79    1.05
  10  -6  -6   15.22    0.92
   5  -3   8    0.82    0.54
  -5  -3  -8    0.12    0.64
   5  -3   8    1.15    0.50
   5   3   8    0.69    0.54
   5   3   8    1.08    0.56
   5   3   8    1.02    0.40
  12  -3  -9   17.69    1.08
 -12   3   9   17.02    1.44
  12  -3  -9   17.59    0.94
 -12  -3   9   18.18    1.08
   7   4   6   91.82    2.12
   7   4   6   84.61    2.79
   7   4   6   89.45    2.53
   7  -4   6   90.08    2.59
  -7  -4  -6   84.64    2.96
   7  -4   6   95.28    2.57
  -4  -4  -8   32.96    1.76
   4   4   8   35.42    1.75
   4   4   8   35.89    1.52
   4   4   8   36.11    1.26
   4  -4   8   34.70    1.42
   4  -4   8   36.91    1.44
  14   0  -8   31.53    1.24
  14   0  -8   29.23    1.20
  12   5  -5   32.18    1.05
 -12   5   5   32.44    1.54
  12  -5  -5   30.27    1.49
 -12   5   5   30.25    1.86
 -12  -5   5   28.01    1.48
  12  -5  -5   31.33    1.37
 -14  -2   2   14.61    1.17
  14  -2  -2   11.85    0.94
  14   2  -2   12.36    0.69
  14   2  -2   13.00    0.98
   2  -7  -7    5.18    0.62
  -2  -7   7    4.51    0.73
   2  -7  -7    4.63    0.63
  -2  -7   7    4.57    0.59
  -2   7   7    3.26    0.72
   2  -4   9    1.99    0.50
  -2  -4  -9    2.23    0.74
   2   4   9    1.39    0.65
   2   4   9    1.74    0.54
   2   4   9    1.43    0.40
  14  -2  -7   50.59    1.79
  14   2  -7   48.06    1.34
  14   2  -7   50.80    1.53
 -14  -2   7   46.90    1.74
  14  -2  -7   46.86    1.66
   0   5   9  248.04    5.50
   0  -5  -9  247.57    5.41
   0  -5   9  251.85    5.02
  -9   4  10    3.02    0.81
  -9  -4  10    2.40    0.60
  -9   4  10    2.01    0.71
   5  -7  -7   14.35    0.98
  -5   7   7   15.64    1.34
  -8  -3  11  139.31    3.55
  -8   3  11  134.75    3.75
  -8   3  11  132.55    3.77
  -8  -3  11  132.97    2.91
   4  -2   9   13.22    1.02
   4   2   9   12.65    1.08
   4  -2   9   12.80    0.85
   4   2   9   14.03    0.80
   1  -8   4  131.70    3.21
   1  -8   4  137.99    3.42
  -1  -8  -4  131.86    3.29
  -9  -3  -5    1.49    0.82
   9  -3   5    1.91    0.57
   9   3   5    1.83    0.39
   9  -3   5    1.57    0.59
  -1   2  11  115.00    3.32
  -1   2  11  109.16    2.96
  -1  -2  11  106.38    2.65
   0   0  11    0.58    0.55
   0   0  11   -0.10    0.39
  10   3   4   27.74    1.50
  10  -3   4   24.68    1.35
  10  -3   4   24.36    1.24
 -10  -3  -4   22.75    1.52
  10   3   4   25.67    0.96
  -5  -8   4    2.33    0.64
  -5   8   4    1.21    0.74
   5  -8  -4    2.33    0.57
  -5   8   4    2.18    0.63
   0   6   8    1.30    0.64
   0  -6   8    1.59    0.54
   0  -6  -8    0.53    0.45
   0  -6  -8    0.96    0.60
   4   8   2  163.13    4.01
   4  -8   2  162.97    3.96
  -4   8  -2  179.49    3.60
  -4  -8  -2  172.14    4.14
   4  -8   2  172.01    3.81
  13  -1   1  250.85    5.14
  13   1   1  252.10    4.90
 -13   1  -1  254.57    5.59
  13  -1   1  243.94    5.48
  13   1   1  246.27    5.49
 -13  -1  -1  250.03    5.80
   1   3  10    1.34    0.56
   1   3  10    1.19    0.68
   1   3  10    1.42    0.44
   1  -3  10    1.24    0.45
  -6   0  12  285.85    5.62
  -6   0  12  285.11    6.17
  -6  -8   2   15.79    1.09
  -6   8   2   14.95    1.28
   6  -8  -2   15.37    1.10
  -6   8   2   14.75    0.98
   6  -8  -2   14.01    0.84
  14   1  -1    9.92    0.92
  14  -1  -1    9.51    0.93
  14   1  -1    9.04    0.70
  14  -1  -1    9.66    0.80
 -14   1   1    8.35    0.91
 -14  -1   1   10.56    1.05
   2  -2  10   22.75    1.24
   2  -2  10   23.81    1.13
   2   2  10   26.60    1.50
   2   2  10   23.43    1.06
 -10   5  -2   -0.16    0.56
  10  -5   2    0.09    0.52
 -10  -5  -2    0.62    0.76
  10   5   2    0.28    0.55
  -9   5   9   40.33    2.04
  -9  -5   9   37.30    1.66
   9  -5  -9   39.04    1.63
   6  -7   3  139.48    3.12
  -6  -7  -3  135.11    3.68
   6  -7   3  137.87    3.45
   6   7   3  127.06    3.44
   6   7   3  133.48    3.54
  -6   7  -3  138.75    3.40
 -13  -4   6    4.91    0.79
 -13   4   6    4.21    0.78
 -13   4   6    5.18    1.04
  13  -4  -6    5.42    0.74
  13   4  -6    4.53    0.49
  14  -1  -8   95.71    2.58
  14   1  -8  100.38    2.38
  14   1  -8   96.27    2.36
  14  -1  -8   97.41    2.51
  -5   0  12  234.55    4.76
  -5   0  12  222.50    5.12
  -5   0  12  232.36    5.15
 -12   4   8   28.24    1.80
  12  -4  -8   32.68    1.50
 -12   4   8   34.01    1.74
  12  -4  -8   33.28    1.35
 -12  -4   8   31.87    1.48
   8  -6  -8  167.91    4.03
  -8   6   8  164.69    4.62
  -8   6   8  165.80    4.32
  -8  -6   8  172.06    4.14
  11  -4  -9   25.44    1.32
 -11   4   9   26.05    1.71
 -11  -4   9   26.83    1.34
  13  -3  -8  163.16    3.90
  13   3  -8  165.18    3.23
  13  -3  -8  162.06    3.70
 -13  -3   8  164.95    3.88
 -13   3   8  165.67    4.43
   5  -8   1    1.57    0.47
   5   8   1    1.13    0.52
  -5  -8  -1    1.05    0.70
  -5   8  -1    1.35    0.50
  -5   8  -1    0.52    0.58
   5  -8   1    1.04    0.40
   5  -8   1    1.50    0.64
   6   5   6    1.68    0.71
  -6  -5  -6    2.76    0.82
   6   5   6    1.68    0.36
   6  -5   6    1.88    0.57
   6  -5   6    2.17    0.59
   6   5   6    1.93    0.65
  10   0   5    0.26    0.62
 -10   0  -5    0.06    0.67
  10   0   5    0.26    0.45
  -7   0  12  178.66    4.43
  -7   0  12  181.48    3.94
   3  -8   3  464.81    8.54
   3  -8   3  443.30    8.51
  -3  -8  -3  455.46    8.72
 -10   2  11   18.78    1.32
  10  -2 -11   20.62    1.14
 -10  -2  11   22.61    0.93
 -10  -2  11   21.15    1.17
 -10   2  11   21.05    1.47
   6  -8  -1    1.86    0.67
   6  -8  -1    1.73    0.45
  -6   8   1    1.76    0.69
  -6   8   1    1.91    0.53
   6   8  -1    1.48    0.45
  -6  -8   1    1.11    0.65
  12  -5  -2    2.25    0.67
 -12   5   2    3.27    0.82
 -12  -5   2    2.49    0.87
 -12   5   2    2.92    0.57
  12   5  -2    2.68    0.58
  12  -5  -2    2.79    0.60
   9  -7  -3    0.30    0.62
   9  -7  -3   -0.22    0.47
  -9   7   3   -0.14    0.69
  -9   7   3    0.17    0.46
  14   3  -4   45.68    1.59
  14  -3  -4   43.87    1.74
 -14  -3   4   48.97    2.01
 -10   6   0    8.27    0.63
  10   6   0    8.99    0.79
  10  -6   0    6.76    0.83
  10  -6   0    7.31    0.76
 -10   6   0    8.83    0.99
  11  -4   2   19.02    1.16
 -11  -4  -2   19.52    1.43
  11  -4   2   18.66    1.18
  11   4   2   17.30    1.19
  14  -3  -5    5.17    0.76
 -14  -3   5    5.41    0.89
  14   3  -5    5.30    0.62
  14  -3  -5    5.42    0.71
   0  -1  11   22.41    1.06
   0   1  11   25.16    1.43
   0  -1  11   24.44    1.29
  11   0 -11   -0.04    0.42
  -6  -8   3  168.38    4.06
  -6   8   3  173.58    4.57
   6  -8  -3  163.89    3.99
  -6   8   3  167.38    4.00
  -7  -7  -2  205.22    5.01
   7  -7   2  218.01    4.48
   7  -7   2  207.61    4.76
  -7   7  -2  221.76    4.90
   7   7   2  210.81    4.76
   8  -3   6  134.54    3.49
   8  -3   6  133.35    3.30
   8   3   6  139.89    2.97
  13  -2  -9  124.16    3.15
  13   2  -9  127.72    2.73
  13  -2  -9  120.71    2.91
  13   2  -9  123.23    2.61
 -13  -2   9  123.51    3.07
  -2   8   5  218.64    5.02
   2  -8  -5  223.17    4.43
   2  -8  -5  210.32    4.57
  -2  -8   5  211.52    4.83
   3  -8  -5    7.16    0.74
  -3  -8   5    5.80    0.76
  -3   8   5    6.81    0.85
  -5  -7  -4   21.52    1.38
   5  -7   4   20.87    1.18
   5   7   4   18.56    1.21
   5   7   4   20.35    0.76
   5   7   4   20.85    1.29
 -11   3  10    4.71    0.94
 -11  -3  10    3.90    0.63
 -11   3  10    3.19    0.77
  11  -3 -10    3.88    0.66
   1  -7  -7  195.13    4.22
  -1  -7   7  189.58    4.09
  -1   7   7  191.75    4.69
   1  -7  -7  201.53    4.30
  -1  -7   7  200.36    4.65
  -6   1  12   44.53    1.60
  -6  -1  12   46.07    1.84
  -6  -1  12   45.85    1.55
  -6   1  12   44.03    1.86
   7   6   4  265.50    4.80
   7   6   4  267.41    5.90
   7  -6   4  276.01    5.72
   7  -6   4  270.87    5.46
  -7   6  -4  274.81    5.50
  -7  -6  -4  275.64    6.13
   7   6   4  278.84    5.78
  13  -4  -2    1.45    0.56
  13  -4  -2    1.41    0.67
 -13  -4   2    0.57    0.86
  13   4  -2    1.13    0.54
 -13   4   2    1.35    0.51
  11   0   4  315.89    6.57
  11   0   4  306.87    5.95
 -11   0  -4  301.96    6.78
  -9   7   2   17.19    1.01
   9  -7  -2   15.62    1.13
   9  -7  -2   17.31    0.99
  -9   7   2   16.36    1.32
   9   7  -2   16.97    0.87
   8  -6   3  118.99    2.98
  -8  -6  -3  117.80    3.44
   8   6   3  112.72    3.17
  -8   6  -3  119.13    3.09
   8  -6   3  110.80    3.10
  11   3   3   72.91    1.78
  11  -3   3   70.37    2.35
 -11  -3  -3   66.32    2.65
  11   3   3   70.49    2.42
  11  -3   3   67.15    2.19
  -9   0  -6  108.52    3.41
   9   0   6  115.96    2.76
   9   0   6  106.36    3.17
   6  -7  -7  155.50    3.76
  -6   7   7  154.18    4.35
  -6   7   7  147.95    3.99
  -5   1  12    5.73    0.66
  -5  -1  12    5.25    0.72
  -5   1  12    5.49    0.78
  -5  -1  12    5.58    0.60
  12  -2 -10  103.67    2.85
 -12   2  10  103.49    3.37
 -12  -2  10  107.08    2.78
 -12   2  10  106.49    3.52
 -12  -5   6  335.85    6.86
  12  -5  -6  324.96    6.76
  12  -5  -6  336.82    6.59
 -12   5   6  324.62    6.94
   9  -7  -4   47.06    1.65
  -9   7   4   46.35    1.83
   9  -7  -4   46.15    1.87
  -9   7   4   49.06    2.26
  -4   0  12  162.67    3.95
  -4   0  12  150.11    3.77
  -4   0  12  158.85    3.55
  -2  -3  11  139.62    3.24
  -2   3  11  144.51    3.38
  -2   3  11  146.54    3.74
  -2   3  11  148.13    4.06
 -10  -1  -5   27.89    1.69
  10  -1   5   30.04    1.56
  10   1   5   31.69    1.23
 -10   1  -5   31.18    1.71
  10  -1   5   33.81    1.36
  10   1   5   31.40    1.60
  -7  -1  12  391.71    8.00
  -7   1  12  404.99    7.42
  -7  -1  12  383.58    7.24
  -7   1  12  383.36    7.99
  15   0  -5    0.31    0.41
  15   0  -5    0.24    0.48
  11  -6  -4   23.49    1.19
  11  -6  -4   23.88    1.39
 -11   6   4   26.32    1.73
 -11   6   4   21.38    1.25
 -11  -6   4   22.74    1.36
   5  -5 -10  151.15    3.64
  -5  -5  10  156.92    3.96
  -5   5  10  147.91    4.00
  -5   5  10  157.31    4.16
  -5  -5  10  145.36    3.18
  11   6  -3    0.19    0.37
 -11  -6   3    0.67    0.64
 -11   6   3   -0.22    0.75
 -11   6   3    0.98    0.50
  11  -6  -3   -0.08    0.49
  11  -6  -3    0.61    0.58
   1  -8  -5    1.47    0.50
  -1  -8   5    0.89    0.56
   1  -8  -5    1.27    0.52
   2   7   6  312.45    6.81
  -2  -7  -6  323.24    6.54
   2   7   6  314.94    6.64
   2  -7   6  307.87    6.17
 -11  -1  11   62.71    1.93
  11  -1 -11   60.89    1.98
  11   1 -11   62.86    1.86
 -11   1  11   66.69    2.55
   4  -8  -5  106.75    2.86
  -4   8   5  106.93    3.11
  -4  -8   5  104.89    2.93
 -14  -3   3   11.03    1.18
  14   3  -3   10.12    0.85
  -8   0  12  371.23    6.94
  -8   0  12  353.84    7.58
  15   0  -4   98.24    2.51
  15   0  -4   97.91    2.75
  14  -3  -6   74.78    2.33
  14   3  -6   76.16    2.00
 -14  -3   6   73.64    2.39
  14  -3  -6   74.94    2.26
   6   2   8    6.81    0.88
   6   2   8    6.09    0.56
   6  -2   8    7.37    0.85
  -6  -2  -8    6.56    0.98
  -4   5  10   42.74    1.94
  -4  -5  10   43.20    1.41
   4  -5 -10   45.96    1.72
  13  -3   0   64.35    2.23
 -13  -3   0   65.54    2.50
  13   3   0   64.94    2.18
  13  -3   0   63.21    2.12
  11  -1   4   97.00    2.55
  11   1   4   96.45    2.40
 -11   1  -4   90.59    3.00
  11  -1   4   97.98    2.93
 -11  -1  -4   93.04    3.12
  11   1   4   92.81    2.89
   6   4   7    0.24    0.62
   6  -4   7    0.04    0.48
  -6  -4  -7    1.08    0.75
   6  -4   7   -0.16    0.54
   6   4   7    0.02    0.32
  -6   5  10   73.69    2.65
  -6  -5  10   76.34    2.58
  -6   5  10   82.17    2.83
   6  -5 -10   77.35    2.38
  -9   3  11    3.58    0.75
  -9  -3  11    4.89    0.72
  -9   3  11    3.82    0.85
  -9  -3  11    3.12    0.42
   9  -3 -11    3.42    0.62
   6  -6   5  104.03    2.66
  -6  -6  -5  105.17    3.21
   6   6   5  105.20    2.25
   6   6   5   99.95    2.96
   6   6   5  104.40    3.11
   6  -6   5  100.17    2.84
   8  -7  -6  218.21    4.94
  -8  -7   6  224.21    5.03
  -8   7   6  227.76    5.18
   3   5   8    0.30    0.34
   3  -5   8    0.45    0.51
   3   5   8    0.46    0.59
  -3  -5  -8    0.39    0.64
   9   1   6   53.48    1.68
   9  -1   6   53.99    1.79
   9   1   6   61.01    2.24
  -9  -1  -6   55.30    2.36
   9  -1   6   56.86    2.13
   3   0  10  232.11    5.09
   3   0  10  208.75    4.47
   6  -8   0  215.86    4.29
   6  -8   0  216.29    4.42
   6   8   0  225.03    4.60
  -6   8   0  220.87    5.18
  -6  -8   0  212.38    4.91
   6  -8   0  213.57    4.90
  -6   8   0  217.27    4.49
  15   0  -6   92.13    2.55
  15   0  -6   96.17    2.45
  -4   1  12  258.13    5.70
  -4  -1  12  252.98    5.09
  -4   1  12  254.82    5.57
  -4   1  12  253.36    5.19
   2   8   4  243.30    5.57
  -2  -8  -4  255.41    5.41
   2  -8   4  254.91    5.28
   2  -8   4  265.62    5.44
   0   4  10    0.19    0.58
   0   4  10    0.20    0.55
   0   4  10   -0.03    0.39
   0  -4  10    0.87    0.45
   3   6   7  395.01    8.09
   3   6   7  385.48    7.78
   3  -6   7  373.45    7.41
   3   6   7  394.52    7.04
  -3  -6  -7  389.52    7.93
  15  -1  -5    4.69    0.66
  15  -1  -5    5.42    0.72
  15   1  -5    5.20    0.69
  15   1  -5    4.40    0.53
 -15  -1   5    4.46    0.89
  -9  -6  -2    1.01    0.79
  -9   6  -2   -0.05    0.59
   9   6   2    0.83    0.51
   9  -6   2    0.42    0.56
   9  -6   2    0.62    0.50
   4  -6  -9    0.12    0.50
  -4   6   9   -0.06    0.60
  -4  -6   9    0.13    0.38
  -4  -6   9    0.11    0.58
   8  -7   1    3.44    0.58
   8   7   1    2.90    0.62
   8  -7   1    3.76    0.70
  -8   7  -1    2.97    0.69
  -8  -7  -1    3.14    0.96
  -5  -6   9   22.61    1.36
  -5   6   9   24.28    1.46
   5  -6  -9   21.28    1.20
  -5   6   9   19.53    1.44
   6  -8  -4   32.75    1.51
  -6  -8   4   33.32    1.54
  -6   8   4   35.50    1.61
  -6   8   4   32.58    1.83
   9  -7  -1   50.67    2.00
  -9   7   1   54.14    2.24
   9   7  -1   51.54    1.66
   9  -7  -1   51.93    1.74
  -9   7   1   50.55    1.66
  -9  -7   1   48.50    2.03
   8  -1 -12  336.98    6.61
  -8  -1  12  332.86    6.32
  -8   1  12  328.62    7.13
 -11   6   5    7.76    0.92
  11  -6  -5    7.91    0.76
  11  -6  -5    7.54    0.87
 -11  -6   5    8.66    0.93
 -11   6   5    7.14    1.05
  13  -2   1    3.32    0.63
 -13   2  -1    3.00    0.68
  13   2   1    2.58    0.47
  13  -2   1    3.39    0.73
  13   2   1    2.76    0.70
 -13  -2  -1    2.74    0.83
  12   0   3    0.62    0.45
 -12   0  -3   -0.24    0.68
  12   0   3    0.53    0.62
   4  -7   5    6.12    0.73
   4   7   5    5.30    0.88
  -4  -7  -5    6.27    0.84
   4   7   5    7.03    0.90
   4   7   5    7.17    0.52
  11  -6  -2    1.22    0.66
 -11  -6   2    0.90    0.76
 -11   6   2    2.01    0.52
  11  -6  -2    1.48    0.55
 -11   6   2    1.19    0.73
  11   6  -2    1.70    0.49
  15  -1  -4    0.22    0.51
  15   1  -4    0.02    0.40
  15  -1  -4    0.48    0.54
  15   1  -4    0.45    0.54
 -15  -1   4   -0.10    0.67
   5   0   9    0.27    0.42
   5   0   9   -0.10    0.62
  14  -2  -1   52.75    1.88
  14   2  -1   56.91    1.58
 -14  -2   1   52.87    2.21
  14   2  -1   58.12    2.04
  -3   5  10   42.42    1.90
   3  -5 -10   40.08    1.61
  -3  -5  10   41.80    1.43
 -11   5   8  143.53    3.96
 -11  -5   8  150.99    3.83
 -11   5   8  152.80    4.43
 -13   4   7   96.98    3.06
  13  -4  -7   92.58    2.78
 -13  -4   7   98.46    2.86
  13  -4  -7   99.12    2.66
 -13   4   7  101.14    3.53
   8   0   7    0.32    0.40
   8   0   7    0.16    0.63
   7   3   7  406.02    7.36
   7  -3   7  407.02    8.03
   7   3   7  414.37    8.35
  -7  -3  -7  415.37    8.64
   0  -8   5   53.79    1.99
   0  -8  -5   53.84    1.83
   0  -8  -5   52.95    1.71
   0  -8   5   49.76    1.73
   3   1  10    8.96    0.96
   3   1  10    9.22    0.71
   3  -1  10    8.52    0.90
  14  -2  -8   45.45    1.70
  14   2  -8   44.26    1.31
 -14  -2   8   42.39    1.66
  14   2  -8   46.06    1.39
  14  -2  -8   43.62    1.59
  10  -6  -7    0.20    0.52
  10  -6  -7    0.50    0.45
 -10   6   7    0.62    0.58
 -10   6   7   -0.15    0.71
 -10  -6   7    0.35    0.58
 -11  -5  -1    0.12    0.72
  11  -5   1    0.92    0.57
  11   5   1    0.36    0.54
 -11   5  -1    1.93    0.74
 -10   4  10    5.31    0.84
 -10  -4  10    6.07    0.77
 -10   4  10    5.45    0.99
  -3  -6   9   32.52    1.21
   3  -6  -9   31.46    1.39
  -3   6   9   29.74    1.61
   0   7   7   27.39    1.51
   0  -7  -7   27.10    1.32
   0  -7   7   26.73    1.23
   0  -7  -7   28.12    1.23
  -3   0  12   82.40    2.27
  -3   0  12   82.08    2.57
 -15  -1   6  296.41    6.28
  15   1  -6  318.15    5.79
  15   1  -6  304.79    6.04
  15  -1  -6  308.02    6.14
  15  -1  -6  309.46    6.09
  -9   7   5    5.92    0.99
  -9   7   5    4.77    0.74
   9  -7  -5    5.33    0.63
   9  -7  -5    6.56    0.84
  -9  -7   5    5.54    0.81
  -7  -5  10  127.26    3.48
   7  -5 -10  119.87    3.17
  -7   5  10  120.57    3.71
  -7   5  10  115.77    3.51
  -1  -6  -8   64.15    2.25
   1   6   8   65.22    2.33
  -1  -6  -8   69.54    2.01
   1  -6   8   66.46    2.03
  -5   8   5  210.69    4.88
   5  -8  -5  204.27    4.61
  -5  -8   5  200.43    4.67
 -12  -5   1   71.24    2.66
  12  -5  -1   70.12    2.25
 -12   5   1   68.07    2.64
  12   5  -1   66.48    2.11
  12  -5  -1   67.45    2.33
 -12   5   1   72.55    2.01
  15   0  -3    0.36    0.45
 -15   0   3    0.61    0.64
  15   0  -3    0.05    0.55
   1   5   9    5.62    0.78
   1   5   9    6.27    0.61
  -1  -5  -9    5.15    0.81
   1  -5   9    5.57    0.67
   1   5   9    5.08    0.92
   6  -6  -9   18.95    1.16
  -6  -6   9   17.81    1.27
  -6   6   9   18.23    1.35
  -6   6   9   20.45    1.51
  13   0 -10   15.98    0.81
  13   0 -10   15.63    0.92
   0   2  11   74.53    2.17
   0   2  11   73.40    2.26
   0  -2  11   74.47    2.11
   0   2  11   73.32    2.56
   5   5   7   98.14    3.10
  -5  -5  -7  103.15    3.24
   5   5   7   99.13    2.35
   5   5   7  101.85    2.86
   5  -5   7  105.91    2.80
   7  -7  -7    0.23    0.54
  -7  -7   7    0.59    0.56
  -7   7   7    0.61    0.77
  -7   7   7   -0.06    0.63
   5  -4 -11   25.25    1.28
  -5  -4  11   23.44    1.01
  -5   4  11   25.51    1.47
  -5   4  11   23.52    1.45
 -12   1  -3    4.63    0.86
  12  -1   3    3.73    0.76
  12   1   3    3.83    0.57
 -12  -1  -3    4.75    0.90
  12  -1   3    4.18    0.66
  12  -3   2    0.64    0.61
  12   3   2    0.80    0.60
  12   3   2    0.65    0.38
 -12  -3  -2    0.98    0.74
  12  -3   2    0.81    0.57
   5   1   9    0.61    0.60
   5  -1   9    1.40    0.67
   5   1   9    1.45    0.46
   5  -1   9    0.24    0.40
  -6   4  11    3.36    0.79
  -6  -4  11    3.44    0.46
  -6   4  11    3.86    0.79
   6  -4 -11    4.01    0.67
  -6  -2  12   77.25    2.10
  -6  -2  12   78.35    2.60
  -6   2  12   77.72    2.63
  -9   0  12   44.36    2.11
  -9   0  12   44.37    1.55
  14   0   0  502.26    9.46
  14   0   0  480.32    8.86
 -14   0   0  488.64    9.56
   9  -6  -8   55.92    2.04
  -9   6   8   57.86    2.28
  -9  -6   8   57.80    2.10
  -9   6   8   60.20    2.55
  12   4   1   61.40    2.17
 -12  -4  -1   65.76    2.51
  12  -4   1   65.11    2.21
  12  -4   1   59.56    2.12
   8  -1   7   19.54    1.04
   8   1   7   18.74    1.31
   8  -1   7   20.36    1.31
   8   1   7   21.10    1.00
  -8  -1  -7   16.76    1.36
  -5  -2  12   12.80    0.82
  -5   2  12   13.92    0.92
  -5   2  12   13.75    1.10
  14  -3  -2   22.87    1.30
 -14  -3   2   21.15    1.44
  14  -3  -2   22.77    1.29
  14   3  -2   23.45    1.23
   5   8   2  285.50    6.05
   5  -8   2  285.01    5.59
   5   8   2  282.03    5.90
  -5   8  -2  278.77    5.28
  -5  -8  -2  282.64    6.07
   5  -8   2  268.86    5.84
  14   0  -9   -0.10    0.44
  14   0  -9   -0.09    0.37
 -13   4   1  133.97    3.14
  13  -4  -1  127.66    3.43
  13   4  -1  127.74    3.28
 -13  -4   1  140.89    3.83
  13  -4  -1  131.05    3.44
 -10  -5   9   15.89    1.09
  10  -5  -9   14.65    1.06
 -10   5   9   15.23    1.39
  -3  -1  12    0.80    0.40
  -3   1  12    0.77    0.54
  -3   1  12    0.36    0.38
  -3   1  12    1.03    0.62
 -14  -3   7   39.27    1.63
  14  -3  -7   39.81    1.57
  14   3  -7   39.79    1.28
  14  -3  -7   37.79    1.63
  10  -2   5    0.42    0.52
  10   2   5    0.27    0.38
  10  -2   5    1.07    0.62
 -10  -2  -5   -0.20    0.70
  -7   2  12   46.81    2.02
  -7  -2  12   50.69    1.58
   0   9   0    0.22    0.65
   0  -9   0   -0.14    0.51
  -7   8   2   20.23    1.11
  -7  -8   2   21.33    1.29
  -7   8   2   20.45    1.48
   7  -8  -2   19.09    0.99
   7  -8  -2   18.80    1.24
   5   6   6  107.67    3.03
  -5  -6  -6  106.76    3.30
   5  -6   6  106.52    2.87
   5   6   6  105.77    2.36
   5   6   6  105.40    3.20
   1   0  11   -0.30    0.61
  15   1  -3   73.17    1.96
  15  -1  -3   72.42    2.39
  15   1  -3   68.74    2.25
 -15  -1   3   69.23    2.43
  15  -1  -3   71.69    2.18
   4  -4 -11  112.20    2.96
  -4  -4  11  107.23    2.59
  -4   4  11  107.87    3.23
  15   0  -7   -0.54    0.47
  15   0  -7    0.22    0.44
   4   8   3    6.50    0.91
   4  -8   3    5.52    0.72
   4  -8   3    5.47    0.68
   4   8   3    7.00    0.86
  -4  -8  -3    4.76    0.93
  -4  -3  -9  105.44    3.27
   4   3   9   99.74    3.13
   4   3   9  100.08    2.46
   4  -3   9   98.53    2.63
   4  -3   9   98.67    2.75
  13  -1 -10    3.01    0.59
  13   1 -10    3.20    0.51
  13  -1 -10    3.26    0.51
  -1   3  11   82.65    2.55
  -1   3  11   80.53    2.82
  -1  -3  11   82.77    2.25
  -1   3  11   81.71    2.27
 -11  -2  11  246.52    5.15
 -11   2  11  239.65    5.87
 -11   2  11  236.04    5.78
  11  -2 -11  243.85    5.18
 -12  -5   7    0.59    0.62
  12  -5  -7    0.72    0.56
 -12   5   7    0.79    0.88
 -12   5   7    0.80    0.67
  -7   4  11   68.50    2.56
  -7   4  11   63.59    2.45
  -7  -4  11   65.36    1.77
  -7  -4  11   68.53    2.39
   7  -4 -11   68.06    2.21
  -7   8   3  102.81    2.83
   7  -8  -3   97.94    2.52
   7  -8  -3   93.55    2.86
  -7   8   3  103.30    3.39
  -7  -8   3  100.64    2.91
   2  -6  -9   35.56    1.45
   2  -6  -9   36.02    1.48
  -2  -6   9   34.89    1.32
  -2   6   9   36.14    1.74
  -1   9   0    0.42    0.65
  -1  -9   0   -0.30    0.55
   1   9   0    0.13    0.62
   1  -9   0    0.13    0.47
  -9   1  12    4.93    0.87
  -9  -1  12    4.65    0.57
  -9  -1  12    5.36    0.72
   9  -1 -12    6.08    0.72
 -11  -2  -4   12.59    1.22
  11  -2   4   12.19    1.04
  11   2   4   13.42    0.79
  11  -2   4   10.40    0.88
  -2   5  10   19.04    1.31
  -2  -5  10   21.13    1.02
   2  -5 -10   19.14    1.09
  14   1   0   17.70    1.21
  14  -1   0   18.48    1.08
 -14  -1   0   19.44    1.39
 -14   1   0   17.21    1.24
  14   1   0   20.18    0.97
  -3  -4  -9    0.06    0.60
   3   4   9    0.52    0.55
   3   4   9    0.06    0.63
   3  -4   9    0.59    0.46
   3   4   9    0.24    0.39
   0   9  -1    2.97    0.66
   0  -9  -1    3.18    0.62
   0   9   1    4.08    0.80
   0  -9   1    4.09    0.62
   1   9  -1  660.58   11.99
  -1   9   1  671.87   12.09
  -1  -9   1  662.55   11.89
   1  -9  -1  679.00   11.74
   2   3  10    8.12    0.68
   2   3  10    7.20    0.78
   2   3  10    9.66    1.02
   2  -3  10    8.58    0.73
   9  -2   6   33.38    1.62
   9   2   6   33.72    1.23
   9   2   6   34.85    1.74
  -9  -2  -6   32.13    1.83
   9  -2   6   34.00    1.44
 -10   6  -1    7.33    0.93
  10  -6   1    6.61    0.81
  10   6   1    7.18    0.78
  10  -6   1    7.06    0.77
  -7  -6   9   88.13    2.81
  -7   6   9   95.59    3.31
   7  -6  -9   90.75    2.68
  -7   6   9   86.72    2.93
 -11  -6   6  495.90    9.64
  11  -6  -6  489.90    9.59
  11  -6  -6  514.16    9.31
 -11   6   6  509.88    9.81
  14   1  -9   64.04    1.81
  14  -1  -9   65.06    1.91
  14   1  -9   66.32    1.78
  14  -1  -9   63.97    2.01
  -6   8  -1   19.10    0.94
  -6   8  -1   20.51    1.30
   6  -8   1   21.94    1.02
   6  -8   1   19.58    1.24
   6  -8   1   18.74    0.98
  -6  -8  -1   19.27    1.35
   6   8   1   18.16    1.10
  -4   2  12   33.52    1.60
  -4  -2  12   30.27    1.24
  -4   2  12   29.97    1.32
  11   6  -1   50.68    1.71
  11  -6  -1   49.49    1.81
  11  -6  -1   46.05    1.93
 -11   6   1   51.28    2.26
 -11   6   1   49.59    1.61
 -11  -6   1   49.27    2.17
   7  -8  -1   59.69    2.20
   7   8  -1   61.34    1.81
  -7   8   1   61.44    2.45
  -7   8   1   55.51    1.87
   7  -8  -1   56.10    1.81
  10  -3 -11    6.57    0.79
 -10  -3  11    6.00    0.75
 -10   3  11    7.33    1.04
 -10   3  11    6.85    0.99
  15   2  -5  211.27    4.51
  15  -2  -5  210.54    4.61
  15  -2  -5  209.45    4.68
 -15  -2   5  207.43    4.84
   1  -1  11   46.75    1.83
   1   1  11   44.77    1.93
   1  -1  11   44.76    1.57
  15   1  -7   33.51    1.34
  15  -1  -7   35.13    1.44
  15  -1  -7   36.57    1.46
  15   1  -7   34.28    1.22
   8  -5 -10   16.54    1.10
  -8  -5  10   17.56    1.21
  -8   5  10   17.28    1.41
  -8   5  10   17.40    1.32
   1  -8   5   36.21    1.60
   1   8   5   36.02    1.73
  -1  -8  -5   38.57    1.60
   1  -8   5   35.10    1.45
  12   0 -11    0.07    0.44
   9  -7   0   37.80    1.49
   9   7   0   37.95    1.49
  -9  -7   0   36.84    1.87
  -9   7   0   38.88    1.87
   9  -7   0   37.22    1.70
  -8   2  12   69.90    2.59
  -8  -2  12   74.19    2.03
  -8  -2  12   72.50    2.35
   8  -2 -12   77.40    2.33
 -13   3   9   -0.32    0.72
 -13   3   9    0.20    0.67
 -13  -3   9    1.14    0.50
  13  -3  -9    0.18    0.54
  13  -3  -9   -0.03    0.42
  15   2  -4  135.38    3.33
  15  -2  -4  136.35    3.48
 -15  -2   4  140.46    3.71
  15  -2  -4  134.85    3.38
   1  -9   1  178.46    3.91
  -1  -9  -1  164.46    3.84
  -1   9  -1  171.16    3.94
   1   9   1  174.33    4.16
 -13   0  -2  184.18    4.63
  13   0   2  177.05    3.90
   6  -8  -5   36.23    1.61
  -6  -8   5   38.33    1.69
  -6   8   5   38.16    1.74
   2  -9  -1  215.02    4.35
  -2   9   1  207.67    4.68
   2  -9  -1  205.30    4.51
   2   9  -1  208.55    4.68
  -2  -9   1  212.76    4.61
   3  -4 -11   11.59    0.92
  -3   4  11   12.68    1.10
  -3  -4  11   14.65    0.84
   3  -8   4   23.29    1.23
   3  -8   4   22.54    1.22
   3   8   4   22.19    1.40
  -3  -8  -4   22.90    1.35
   3   8   4   20.62    1.34
   3  -7   6   32.97    1.45
   3   7   6   30.67    1.67
  -3  -7  -6   31.48    1.60
   3   7   6   30.47    1.58
   2   9   0  157.12    3.87
   2  -9   0  159.03    3.50
  -2   9   0  160.26    3.75
   2  -9   0  155.36    3.69
  -2  -9   0  163.31    3.76
  -2   0  12    0.77    0.46
  -2   0  12    1.18    0.58
   5   4   8   71.24    1.89
  -5  -4  -8   67.48    2.61
   5   4   8   69.91    2.20
   5  -4   8   67.67    2.13
   5   4   8   70.92    2.58
   5  -4   8   68.91    2.17
 -12   4   9   21.41    1.48
 -12  -4   9   27.02    1.39
  12  -4  -9   23.39    1.32
 -12   4   9   26.94    1.78
  12  -4  -9   24.06    1.14
   3   2  10   47.71    1.58
   3  -2  10   49.11    1.68
   3  -2  10   46.94    1.84
   3   2  10   48.35    2.06
 -12  -3  10    0.30    0.49
 -12   3  10   -0.07    0.77
  12  -3 -10    0.27    0.50
 -12   3  10   -0.07    0.66
  -9   5  -4   57.97    1.98
   9  -5   4   55.49    2.04
  -9  -5  -4   55.88    2.36
   9   5   4   59.55    2.22
   9  -5   4   59.64    2.03
  15  -2  -6   23.25    1.23
 -15  -2   6   22.43    1.40
  15  -2  -6   22.83    1.23
  15   2  -6   21.93    1.08
  15   0  -2    4.27    0.62
  15   0  -2    5.41    0.78
 -15   0   2    4.92    0.85
  -7   8   4   14.39    1.09
  -7  -8   4   14.99    1.10
  -7   8   4   13.54    1.29
   7  -8  -4   12.32    1.03
  -4   7   8   55.28    2.23
   4  -7  -8   56.42    1.97
   7   0   8   31.64    1.65
   7   0   8   31.13    1.29
  -8  -4  11   74.34    2.54
  -8   4  11   71.04    2.62
  -8   4  11   71.60    2.68
   8  -4 -11   69.35    2.28
  -1  -7  -7   35.07    1.57
   1  -7   7   32.90    1.42
   1   7   7   36.37    1.70
  -1  -7  -7   33.76    1.33
  -3  -8   6   89.69    2.75
  -3   8   6   90.39    2.87
   3  -8  -6   88.22    2.53
  -1   9   2    8.39    0.94
  -1  -9   2    7.86    0.81
   1  -9  -2    6.84    0.72
   8   5   5   14.85    1.19
   8  -5   5   15.49    1.06
   8  -5   5   15.25    1.07
   8   5   5   15.43    0.69
  -8  -5  -5   13.69    1.29
   8   5   5   14.22    1.05
   9   4   5  231.99    4.33
   9  -4   5  225.02    5.04
   9   4   5  217.99    5.25
  -9  -7   6   80.75    2.62
  -9   7   6   85.48    2.75
   9  -7  -6   87.94    2.68
  12   1 -11   19.08    0.98
  12  -1 -11   18.34    1.06
 -12   1  11   18.40    1.47
   7   7   3  274.78    6.05
   7  -7   3  283.11    5.62
   7   7   3  280.32    6.06
   7  -7   3  274.42    5.97
  -7  -7  -3  280.07    6.29
  10   4   4   46.39    1.97
  10  -4   4   45.29    1.80
  10  -4   4   48.77    1.88
  10   4   4   47.13    1.31
 -10  -4  -4   44.76    2.17
  -3  -7   8  132.48    3.63
  -3   7   8  129.42    3.68
   3  -7  -8  130.00    3.28
  12  -2   3    5.13    0.72
  12   2   3    5.64    0.87
 -12  -2  -3    5.60    0.94
  12  -2   3    4.75    0.79
  12   2   3    5.00    0.56
   5   2   9   11.39    1.10
   5  -2   9   11.31    0.97
   5   2   9   10.18    0.72
   1  -4  10   89.40    2.41
   1   4  10   87.76    2.64
   1   4  10   83.55    2.93
   1   4  10   85.33    2.32
   6  -3   8   54.53    1.96
  -6  -3  -8   55.90    2.35
   6   3   8   50.51    1.56
   6   3   8   53.75    2.19
 -10   0  12   91.44    3.09
  10   0 -12   92.11    2.53
  13   1   2   45.06    1.52
  13  -1   2   46.42    1.68
 -13   1  -2   48.23    2.02
 -13  -1  -2   47.84    2.15
  13   1   2   44.36    1.91
  13  -1   2   45.90    1.91
  -5   7   8    0.56    0.74
   5  -7  -8    1.40    0.61
   2  -8  -6   22.15    1.16
  -2  -8   6   21.42    1.30
   0  -9  -2    9.54    0.85
   0  -9   2    8.64    0.82
   6   7   4   13.87    1.11
  -6  -7  -4   13.71    1.22
   6  -7   4   15.40    1.07
  -6   7  -4   15.83    0.97
   6   7   4   15.32    1.19
  -2   9   2  142.04    3.71
   2  -9  -2  141.07    3.47
  -2  -9   2  141.69    3.56
  -4  -8   6    0.60    0.59
  -4   8   6    0.89    0.64
   4  -8  -6    0.55    0.56
 -13  -5   4   99.88    3.11
  13  -5  -4  100.77    3.00
  13   5  -4  107.60    2.53
 -13   5   4  100.46    3.53
  13  -5  -4  102.96    2.86
 -13   5   4  102.43    2.94
  -8   7   7  206.05    5.41
  -8   7   7  211.63    5.01
  -8  -7   7  196.12    4.73
   8  -7  -7  206.18    4.73
  -2   1  12   11.79    0.83
  -2  -1  12    9.94    0.78
  -2   1  12    9.77    1.01
  10  -7  -3  145.34    3.82
 -10   7   3  153.74    4.32
 -10   7   3  154.25    3.67
  10  -7  -3  154.04    3.54
   8   2   7  226.86    5.41
   8  -2   7  239.25    4.94
   8  -2   7  234.87    5.25
   8   2   7  233.25    4.61
  -1   6   9    0.33    0.62
  -1  -6   9    0.77    0.50
   1  -6  -9    2.09    0.56
   1  -6  -9    1.11    0.55
 -10   5  -3  141.53    3.69
  10  -5   3  146.84    3.64
  10   5   3  139.74    3.73
  -3  -2  12    6.08    0.65
  -3   2  12    6.09    0.66
  -3   2  12    5.27    0.79
 -13   4   8   17.52    1.51
 -13   4   8   16.71    1.29
  13  -4  -8   17.67    1.04
 -13  -4   8   17.36    1.17
  13  -4  -8   18.30    1.19
  15  -1  -2   19.06    1.22
  15   1  -2   19.09    1.17
  15  -1  -2   22.87    1.39
 -15  -1   2   22.96    1.41
  15   1  -2   21.39    1.00
   7  -1   8   18.43    1.01
   7   1   8   18.64    0.97
   7   1   8   19.57    1.35
   7  -1   8   20.15    1.31
 -15  -2   3   16.05    1.29
  15   2  -3   14.00    1.02
  15  -2  -3   14.99    1.06
  15  -2  -3   14.74    1.09
 -13  -5   5    8.64    0.94
 -13   5   5    8.91    0.92
  13  -5  -5    8.34    0.80
  13  -5  -5    9.95    0.97
 -13   5   5    9.54    1.20
 -10   7   4    8.00    1.11
  10  -7  -4    7.55    0.74
 -10  -7   4    7.08    0.89
  10  -7  -4    8.01    0.94
 -10   7   4    7.51    0.83
  -2   9  -1    6.44    0.78
   2   9   1    6.91    0.91
   2  -9   1    7.11    0.70
   2  -9   1    6.70    0.79
  13  -2 -10   17.06    1.07
 -13  -2  10   16.82    1.04
  13  -2 -10   14.72    0.87
  13   2 -10   15.78    0.81
  14  -4  -4    0.68    0.63
 -14  -4   4    0.91    0.85
  14   4  -4    0.30    0.45
  14  -4  -4    1.24    0.56
   3  -9  -1   80.33    2.13
   3  -9  -1   83.99    2.47
  -3   9   1   84.06    2.50
  -3  -9   1   86.39    2.52
 -14  -4   5   14.63    1.21
 -14   4   5   14.94    1.16
  14  -4  -5   13.64    1.08
  14   4  -5   14.83    0.86
   7   8   0    1.33    0.51
   7  -8   0    1.01    0.64
  -7   8   0    1.48    0.67
  -7   8   0    1.07    0.47
   7  -8   0    0.87    0.44
  -7  -8   0    0.32    0.85
  12  -5   0    2.83    0.72
 -12   5   0    3.15    0.86
 -12  -5   0    2.06    0.94
  12   5   0    2.17    0.62
  12  -5   0    2.75    0.65
  -8   7  -2   85.90    2.67
   8  -7   2   80.49    2.30
   8   7   2   83.07    2.53
   8  -7   2   82.16    2.60
  -8  -7  -2   82.10    2.82
   8   4   6    1.31    0.37
   8   4   6    1.06    0.59
   8  -4   6    1.64    0.66
   8   4   6    1.04    0.66
  -8  -4  -6    1.62    0.78
  -8  -6   9   23.06    1.37
   8  -6  -9   23.83    1.32
  -8   6   9   23.02    1.62
  13  -3   1  108.56    3.07
 -13  -3  -1  107.01    3.33
  13   3   1   99.01    2.96
  13  -3   1   99.89    2.86
  -1  -5  10    2.54    0.55
  -1   5  10    2.06    0.70
   2   6   8   60.00    2.21
   2  -6   8   56.14    1.91
   2   6   8   60.58    1.74
   2   6   8   52.54    2.30
  -2  -6  -8   58.29    2.19
 -11   4  10   10.00    1.21
  11  -4 -10   10.69    0.94
 -11  -4  10    9.56    0.89
 -13   5   3    0.34    0.50
 -13  -5   3    0.06    0.83
  13   5  -3    0.66    0.47
 -13   5   3    1.63    0.84
  13  -5  -3    1.08    0.66
  13  -5  -3    0.76    0.55
 -10   1  12   47.73    2.16
 -10  -1  12   46.94    1.55
  10  -1 -12   45.76    1.74
 -10  -1  12   46.68    1.77
  15   0  -8    2.92    0.54
  15   0  -8    2.97    0.52
  -9   2  12    6.61    0.98
  -9  -2  12    7.79    0.80
  -9  -2  12    5.92    0.57
  -9   2  12    5.89    0.97
   9  -2 -12    5.82    0.74
  -2   7   8   61.10    2.33
  -2  -7   8   59.67    1.83
   2  -7  -8   60.52    1.90
  -2  -7   8   63.93    2.33
   2  -7  -8   61.50    2.01
  14   3  -1   78.76    2.46
  14  -3  -1   82.08    2.64
  14  -3  -1   82.95    2.54
 -14  -3   1   79.98    2.86
 -14  -2   0  303.59    6.69
  14  -2   0  299.68    6.37
  14  -2   0  296.61    6.09
  14   2   0  296.26    6.29
  10   7  -2   74.99    2.00
 -10   7   2   73.83    2.18
  10  -7  -2   69.60    2.47
 -10   7   2   70.18    2.71
  10  -7  -2   71.07    2.19
   1  -8  -6   36.20    1.44
  -1  -8   6   33.93    1.66
   1  -8  -6   35.27    1.44
  11   4   3    0.48    0.61
 -11  -4  -3    0.34    0.79
  11  -4   3    0.24    0.58
  11  -4   3    0.32    0.62
   3  -9   0   99.17    2.49
   3  -9   0  102.78    2.81
   3   9   0  100.55    2.91
  -3   9   0  100.74    2.72
  -3  -9   0   97.16    2.76
   4   6   7    1.42    0.71
  -4  -6  -7    2.16    0.78
   4   6   7    1.13    0.38
   4  -6   7    1.52    0.59
   4   6   7    1.79    0.69
  -7  -5  -6  139.82    4.00
   7   5   6  137.47    3.48
   7  -5   6  133.53    3.36
   7  -5   6  134.86    3.44
   7   5   6  135.55    2.85
   7   5   6  134.47    3.77
  -1  -9  -2   71.17    2.22
   1  -9   2   67.60    2.11
  -1   9  -2   72.75    2.13
   1   9   2   72.80    2.44
   4   5   8   56.21    2.02
   4  -5   8   49.65    1.79
   4   5   8   50.44    1.56
  -4  -5  -8   51.97    2.20
 -14  -3   8   -0.18    0.55
  14  -3  -8    0.55    0.49
  14  -3  -8    0.36    0.52
 -14   3   8    1.60    0.77
   6  -7  -8  329.40    6.53
  -6   7   8  329.40    7.30
  -3   9   2  112.62    3.10
  -3  -9   2  112.82    3.00
   3  -9  -2  110.01    2.93
  14  -2  -9   15.06    0.93
  14   2  -9   15.81    0.77
  14   2  -9   15.03    0.76
  14  -2  -9   15.36    1.04
 -14  -2   9   14.92    1.01
   5  -8  -6  116.49    3.12
  -5   8   6  113.31    3.34
  -5   8   6  118.14    3.74
  -5  -8   6  112.71    3.17
  -2  -5  -9   45.91    1.98
   2   5   9   46.17    1.54
   2   5   9   45.77    2.10
   2   5   9   48.39    1.92
   2  -5   9   47.58    1.68
  -2   4  11   88.91    2.81
  -2  -4  11   87.06    2.35
  -2   4  11   92.56    2.51
  -9   5  10   46.16    2.27
  -9  -5  10   48.84    1.94
  -9   5  10   47.20    2.15
   9  -5 -10   47.39    1.88
   1  -2  11    3.90    0.57
   1   2  11    3.94    0.54
  15  -2  -7    0.55    0.50
  15   2  -7    0.92    0.42
 -15  -2   7    0.36    0.67
  15  -2  -7    0.54    0.55
   5  -7   5   70.60    2.33
   5   7   5   74.85    2.55
   5   7   5   71.23    1.73
   5   7   5   73.18    2.48
  -5  -7  -5   73.04    2.54
 -10  -6   8  180.28    4.41
  10  -6  -8  181.44    4.38
 -10   6   8  178.97    4.98
 -10   6   8  184.00    4.64
   0   3  11   13.13    0.88
   0  -3  11   14.12    0.91
   0   3  11   13.13    1.03
   0   3  11   14.29    1.22
   8  -6   4   14.14    1.01
  -8  -6  -4   13.36    1.26
   8  -6   4   14.29    1.06
   8   6   4   13.29    1.09
  14   4  -3   10.98    0.86
  14  -4  -3   10.75    1.03
 -14   4   3   11.47    0.97
 -14  -4   3   11.48    1.26
  14  -4  -3   10.56    0.96
  14  -4  -6    2.39    0.67
 -14  -4   6    3.22    0.72
 -14   4   6    2.68    0.69
  14  -4  -6    3.04    0.64
  14   4  -6    2.26    0.45
   2   8   5    1.29    0.72
   2  -8   5    0.75    0.50
  -2  -8  -5    0.76    0.62
   2  -8   5    0.28    0.56
  15  -1  -8  413.55    7.91
  15   1  -8  435.59    7.66
  15   1  -8  418.05    7.69
  15  -1  -8  412.99    7.85
 -13  -4   0  268.90    6.13
  13  -4   0  253.38    5.62
  13   4   0  258.28    5.56
  13  -4   0  261.92    5.69
  -6  -3  12    6.26    0.61
   6  -3 -12    6.54    0.78
  -6   3  12    6.30    0.92
 -11   6   7   12.50    1.32
  11  -6  -7   11.05    0.84
 -11   6   7   10.88    1.09
 -11  -6   7   11.37    1.05
  11  -6  -7   11.35    1.02
  -9   4  11   99.01    3.23
  -9   4  11  103.37    3.39
  -9  -4  11  105.57    3.07
   4   0  10  202.94    4.84
   4   0  10  204.83    4.33
  10  -7  -5   24.23    1.18
 -10   7   5   23.22    1.67
 -10  -7   5   23.25    1.39
 -10   7   5   24.05    1.38
  10  -7  -5   22.74    1.36
 -13   5   6   34.26    1.71
  13  -5  -6   32.48    1.59
 -13  -5   6   31.34    1.63
  13  -5  -6   32.08    1.44
  11   6   0    0.50    0.50
  11  -6   0    0.09    0.51
 -11   6   0    0.52    0.74
 -11  -6   0    0.56    0.94
  11  -6   0    0.93    0.66
  -7  -8   5    3.72    0.74
  -7   8   5    3.24    0.94
  -7   8   5    2.65    0.72
   7  -8  -5    2.69    0.68
  -5  -3  12    2.97    0.50
  -5   3  12    3.40    0.77
 -12  -5   8   -0.05    0.57
  12  -5  -8    0.15    0.54
 -12   5   8    0.30    0.69
 -12   5   8   -0.57    0.77
   9  -6   3    6.09    0.84
   9  -6   3    5.95    0.74
   9   6   3    5.17    0.81
  -9  -6  -3    5.99    1.01
  -9   6  -3    6.18    0.78
  -1   9   3   14.33    1.17
  -1  -9   3   15.94    1.04
   1  -9  -3   17.98    1.05
 -11   5   9  114.31    3.81
 -11   5   9  118.50    3.53
 -11  -5   9  116.08    3.24
  -2   9   3   17.77    1.22
  -2  -9   3   15.89    1.09
   2  -9  -3   17.26    1.05
 -12   6   4  261.95    5.88
 -12   6   4  263.25    6.66
  12  -6  -4  254.40    5.70
  -7  -6  -5   12.94    1.24
   7   6   5   11.97    1.09
   7   6   5   13.51    1.09
   7   6   5   13.86    0.65
   7  -6   5   12.24    1.02
   7  -6   5   14.02    0.98
  10  -3   5   70.20    2.36
  10   3   5   67.57    2.45
  10   3   5   68.66    1.80
  10  -3   5   63.30    2.13
 -10  -3  -5   69.19    2.73
   5  -8   3   38.65    1.69
   5  -8   3   42.12    1.58
   5   8   3   41.60    1.84
   5   8   3   41.76    1.78
  -5  -8  -3   41.70    1.90
  -7   3  12   81.29    2.77
  -7  -3  12   75.74    2.03
   7  -3 -12   73.57    2.38
  -7   3  12   80.15    2.76
 -11   5  -2   97.20    3.03
  11   5   2   97.29    2.87
 -11  -5  -2   98.53    3.24
  11  -5   2   92.48    2.77
   6   8   2  132.29    3.59
  -6   8  -2  138.90    3.59
  -6  -8  -2  135.13    3.74
   6  -8   2  134.76    3.18
   6  -8   2  134.90    3.53
   6   8   2  134.21    3.44
 -11  -3  11   30.30    1.44
 -11   3  11   30.11    1.72
 -11   3  11   31.99    1.89
  11  -3 -11   27.17    1.38
 -12   2  11   91.97    3.14
 -12  -2  11   92.67    2.58
 -12   2  11   88.28    3.24
  12  -2 -11   91.58    2.65
  -1   0  12  276.02    5.56
  -1   0  12  281.45    6.02
  -8   8   3   17.46    1.11
   8  -8  -3   16.10    0.94
  -8  -8   3   16.21    1.20
  -8   8   3   16.87    1.44
   8  -8  -3   17.61    1.24
  12  -6  -3    3.03    0.62
 -12   6   3    1.83    0.80
  12   6  -3    2.13    0.50
 -12  -6   3    1.63    0.79
 -12   6   3    2.42    0.57
  -8   8   2   19.59    1.12
  -8   8   2   23.89    1.58
  -8  -8   2   23.35    1.39
   8  -8  -2   20.28    1.32
   8  -8  -2   19.91    1.07
 -13  -2  -2   31.79    1.83
  13  -2   2   32.45    1.44
  13  -2   2   34.48    1.67
  13   2   2   33.21    1.20
  13   2   2   30.32    1.58
 -13   2  -2   32.97    1.65
  -1   7   8  181.82    4.62
  -1  -7   8  182.99    4.03
   1  -7  -8  185.22    4.21
 -13  -5   2  173.04    4.51
 -13   5   2  166.11    3.83
  13  -5  -2  165.03    4.03
  13   5  -2  169.82    3.83
  13  -5  -2  165.74    4.19
 -13   5   2  169.15    4.73
  11   3   4   14.02    1.18
  11  -3   4   11.72    1.06
  11   3   4   12.48    0.73
 -11  -3  -4   11.33    1.20
  11  -3   4   12.32    1.00
   3  -9   1   63.95    1.93
  -3   9  -1   69.22    2.06
   3   9   1   68.80    2.34
  -3  -9  -1   65.64    2.18
   3  -9   1   64.20    2.17
  -9  -7  -1    7.81    1.20
  -9   7  -1    7.44    0.92
   9  -7   1    7.13    0.75
   9  -7   1    7.43    0.92
   9   7   1    7.58    0.81
   4  -9  -1    3.14    0.73
  -4  -9   1    3.36    0.68
  -4   9   1    2.35    0.68
   4  -1  10    1.28    0.64
   4   1  10    0.67    0.41
   4   1  10    0.81    0.67
  -2   2  12    4.19    0.77
  -2   2  12    3.29    0.84
  -2  -2  12    3.59    0.57
   0   9   3   88.68    2.82
   0  -9  -3   95.71    2.61
   0  -9   3   94.22    2.62
   0  -8   6   31.60    1.37
   0  -8  -6   33.56    1.47
   0   8   6   31.41    1.64
   0  -8   6   34.79    1.63
   2   0  11    0.05    0.62
  10   7  -1  189.38    4.06
 -10   7   1  185.09    4.00
  10  -7  -1  185.81    4.17
 -10   7   1  189.92    4.88
  10  -7  -1  180.13    4.51
   9  -3   6    0.29    0.55
  -9  -3  -6    0.63    0.77
   9   3   6    0.42    0.38
   9  -3   6    0.30    0.63
   7  -4   7    2.39    0.62
   7   4   7    2.16    0.41
  -7  -4  -7    1.71    0.82
   7  -4   7    2.98    0.68
   7   4   7    1.80    0.67
   3  -9  -3   28.60    1.37
  -3   9   3   31.53    1.54
  -3  -9   3   30.36    1.45
 -12  -6   5   75.73    2.57
  12  -6  -5   75.36    2.31
 -12   6   5   75.28    3.02
 -12   6   5   72.81    2.49
   2   9   2   39.03    1.79
   2  -9   2   35.41    1.43
   2  -9   2   41.27    1.63
  -2   9  -2   40.07    1.47
  -2  -9  -2   37.92    1.66
  14   0   1    0.10    0.63
  14   0   1   -0.03    0.51
 -14   0  -1   -0.42    0.76
  -4  -9   2   14.37    1.05
  -4   9   2   13.63    1.04
   4  -9  -2   15.47    1.07
  -7  -7   8   11.71    1.06
   7  -7  -8   12.37    1.03
  -7   7   8   12.84    1.29
  -7   7   8   13.55    1.19
  -4  -3  12    4.65    0.57
  -4   3  12    4.19    0.79
  -4   3  12    4.44    0.67
  15   2  -2   60.63    2.09
 -15  -2   2   62.81    2.38
  15  -2  -2   60.36    2.07
  -6   8   6    5.20    1.02
   6  -8  -6    7.57    0.86
  -6  -8   6    7.46    0.86
  -6   8   6    5.87    0.89
   7  -2   8   -0.15    0.67
   7  -2   8    0.38    0.50
   7   2   8    0.59    0.42
   7   2   8    1.71    0.74
   0  -6  -9  146.23    3.74
   0   6   9  144.87    3.90
   0  -6  -9  153.34    3.53
   0  -6   9  148.09    3.46
  15  -3  -5   39.56    1.67
  15   3  -5   41.06    1.51
 -15  -3   5   43.27    1.93
  15  -3  -5   42.00    1.73
  15   0  -1    0.25    0.60
  15   0  -1    0.14    0.51
 -15   0   1   -0.05    0.68
   4   8   4    8.00    0.99
   4   8   4    5.85    0.82
   4  -8   4    7.94    0.87
  -4  -8  -4    8.11    1.00
  -2  -7  -7    1.65    0.68
   2   7   7    2.33    0.82
   2   7   7    1.37    0.70
   2  -7   7    1.99    0.65
  14   0 -10  158.59    2.90
  14   0 -10   26.95    1.43
  -1  -1  12   40.93    1.50
  -1   1  12   42.79    1.90
  -1   1  12   40.01    1.53
  11   0 -12    0.87    0.49
  -8  -3  12   17.85    1.21
  -8  -3  12   15.03    0.82
  -8   3  12   14.89    1.25
  -8   3  12   15.31    1.25
 -12  -4  -2   49.97    2.27
  12   4   2   50.23    2.00
  12  -4   2   49.46    1.97
  12  -4   2   49.65    1.94
  15  -3  -4   50.94    1.96
 -15  -3   4   54.23    2.24
  15  -3  -4   52.22    1.97
  15   3  -4   51.72    1.77
 -10   2  12    9.89    1.15
 -10  -2  12    9.96    0.90
 -10   2  12    9.54    1.12
  10  -2 -12    8.98    0.87
 -10  -2  12   10.00    0.70
  -8   8   4   88.47    3.19
  -8   8   4   88.54    2.70
   8  -8  -4   86.72    2.71
   8  -8  -4   86.72    2.38
  -8  -8   4   87.46    2.73
   6   0   9    0.56    0.66
   6   0   9   -0.24    0.45
   6   5   7   21.37    1.44
   6   5   7   23.64    1.34
  -6  -5  -7   23.58    1.60
   6   5   7   23.16    0.95
   6  -5   7   22.96    1.27
   4  -9   0   -0.05    0.62
  -4  -9   0   -0.53    0.66
   4   9   0    0.35    0.46
   4   9   0    0.10    0.64
   4  -9   0   -0.47    0.45
   7  -8   1   98.30    2.92
   7  -8   1   90.02    2.37
  -7  -8  -1   96.33    3.04
   7  -8   1   94.23    2.48
   7   8   1  100.12    2.72
  -7   8  -1   96.75    3.00
  11   0   5   -0.11    0.70
  11   0   5    0.17    0.48
 -11   0  -5   -0.13    0.77
  10  -6   2  195.48    4.46
  10  -6   2  195.15    4.64
 -10   6  -2  201.93    4.80
  10   6   2  201.54    4.64
  -9  -6   9    4.62    0.73
  -9   6   9    3.82    0.92
  -9   6   9    3.71    0.84
   9  -6  -9    3.06    0.69
   2   1  11   31.02    1.28
   2  -1  11   32.64    1.55
   2   1  11   30.89    1.64
   2  -1  11   30.20    1.30
   8  -8  -1   16.01    0.97
  -8   8   1   14.34    0.92
   8  -8  -1   14.09    1.17
  -8   8   1   14.19    1.25
  -8  -8   1   15.23    1.23
   3  -3  10    9.77    0.81
   3   3  10    9.54    0.74
   3   3  10    9.71    1.04
   9  -7  -7   65.37    2.30
  -9  -7   7   66.47    2.36
  -9   7   7   65.57    2.77
  -9   7   7   65.61    2.42
  14  -4  -2   -0.10    0.74
  14   4  -2    0.04    0.56
  14  -4  -2   -0.58    0.56
 -14   4   2   -0.12    0.50
 -14  -4   2   -0.18    0.90
  14   1   1   29.25    1.20
 -14   1  -1   27.45    1.58
  14  -1   1   28.73    1.34
  14   1   1   31.70    1.60
 -14  -1  -1   26.96    1.65
  -4  -7  -6   78.05    2.66
   4   7   6   79.35    2.60
   4  -7   6   76.31    2.37
   4   7   6   74.21    2.70
   4   7   6   74.18    1.88
  15  -3  -6   13.68    1.04
 -15  -3   6   13.54    1.17
  15  -3  -6   14.30    1.02
  15   3  -6   13.67    0.85
  10   0   6    0.03    0.49
 -10   0  -6    0.88    0.69
  10   0   6    0.06    0.68
  14  -4  -7   42.14    1.77
 -14   4   7   41.72    1.94
  14  -4  -7   43.59    1.68
 -14  -4   7   43.33    1.86
 -14   4   7   45.00    2.38
   6   6   6    1.08    0.73
   6   6   6    0.98    0.35
   6   6   6    0.98    0.67
  -6  -6  -6    1.23    0.75
   6  -6   6    1.07    0.60
   0   5  10   22.76    1.14
   0  -5  10   23.02    1.13
   0   5  10   21.92    1.35
 -12   6   2   27.42    1.73
 -12   6   2   26.67    1.24
  12  -6  -2   26.56    1.36
 -12  -6   2   24.37    1.67
  12   6  -2   27.25    1.21
  13   0 -11   -0.11    0.45
  15   1  -1  141.75    3.65
  15   1  -1  137.98    3.12
 -15  -1   1  132.61    3.81
  15  -1  -1  132.34    3.31
  15  -1  -1  138.09    3.65
   4   4   9    2.66    0.69
   4  -4   9    1.89    0.54
  -4  -4  -9    3.01    0.82
   4   4   9    3.12    0.51
   4   4   9    3.49    0.80
  14   1 -10   81.14    2.01
  14  -1 -10   80.84    2.17
  14   1 -10   77.35    2.12
  14  -1 -10   81.64    2.36
  -1   4  11  178.70    4.40
  -1   4  11  190.07    4.90
  -1   4  11  185.05    4.04
  -1  -4  11  176.08    3.94
 -11   1  12   59.94    2.48
 -11   1  12   61.26    2.57
  11  -1 -12   63.52    2.08
 -11  -1  12   64.85    1.88
   1  -9   3    2.07    0.59
  -1  -9  -3    2.75    0.80
   1   9   3    2.04    0.77
 -12  -3  -3  202.09    5.29
  12  -3   3  210.31    4.86
  12  -3   3  197.57    4.61
  12   3   3  206.77    4.90
   5  -3   9   -0.20    0.48
  -5  -3  -9    0.34    0.77
   5   3   9   -0.31    0.65
   5  -3   9    0.86    0.60
   5   3   9    0.03    0.35
  -4  -9   3  100.74    2.90
  -4   9   3  105.42    3.01
   4  -9  -3  105.79    2.89
  15  -2  -8   82.13    2.44
  15  -2  -8   82.56    2.36
 -15  -2   8   78.15    2.40
  15   2  -8   79.24    2.07
   6  -1   9   66.25    2.39
   6  -1   9   69.64    2.10
   6   1   9   66.72    2.00
   6   1   9   67.45    2.48
  12   0   4  117.14    3.40
 -12   0  -4  108.83    3.51
  12   0   4  114.04    2.84
 -10   7   6    0.39    0.59
 -10  -7   6   -0.21    0.61
  10  -7  -6   -0.26    0.64
  10  -7  -6    0.61    0.46
  11  -1   5   62.12    1.98
 -11  -1  -5   61.49    2.53
  11   1   5   61.97    2.36
  11   1   5   59.67    1.83
  11  -1   5   61.21    2.30
   2   4  10    0.84    0.44
   2   4  10    1.06    0.59
   2  -4  10    0.53    0.47
   2   4  10    0.26    0.66
  13  -5  -7    5.68    0.81
 -13   5   7    4.60    1.05
 -13  -5   7    5.65    0.89
 -13   5   7    5.56    0.90
   8  -3   7   32.30    1.56
   8   3   7   33.77    1.24
   8  -3   7   32.20    1.46
   8   3   7   33.46    1.74
  16   0  -5    0.04    0.51
  16   0  -5    0.30    0.48
  10  -5 -10   16.04    1.13
 -10   5  10   15.17    1.44
 -10  -5  10   15.29    1.14
 -12  -6   6    4.56    0.84
 -12   6   6    5.19    0.87
  12  -6  -6    5.29    0.68
  -3   3  12   -0.11    0.69
  -3  -3  12    0.03    0.43
  -3   3  12   -0.33    0.73
  10  -1   6  100.83    3.06
  10   1   6   95.89    2.49
 -10  -1  -6   93.21    3.25
  10  -1   6  101.98    2.69
  10   1   6  100.00    3.12
 -10   4  11    1.04    0.70
 -10  -4  11    1.26    0.60
 -10   4  11    0.65    0.76
  15   3  -3  340.61    6.76
  15  -3  -3  330.33    6.91
  13  -1 -11    2.60    0.59
  13   1 -11    2.63    0.53
  13  -3 -10   50.06    1.89
 -13  -3  10   48.39    1.84
 -13   3  10   45.65    2.37
  -5  -6  10    6.68    0.92
  -5   6  10    7.05    1.01
   5  -6 -10    8.24    0.84
  15   0  -9    0.03    0.42
  16   0  -6  240.80    5.23
  16   0  -6  256.31    5.07
   0  -7   8  154.02    3.62
   0  -7  -8  160.92    3.66
   0   7   8  154.83    4.11
   0  -7  -8  159.87    3.88
  -5   5  11    0.19    0.71
  -5  -5  11   -0.15    0.40
   5  -5 -11    0.23    0.54
 -13   4   9  145.69    4.12
 -13  -4   9  146.65    3.70
 -13   4   9  151.12    4.52
  13  -4  -9  145.24    3.74
  13  -4  -9  144.99    3.45
   6  -5 -11   51.57    1.93
  -6   5  11   51.20    2.20
  -6  -5  11   52.37    2.18
  -6   5  11   50.74    2.25
   4  -6 -10  209.81    4.73
  -4   6  10  202.27    5.11
  -4  -6  10  216.04    5.13
  -9   3  12   35.01    1.82
   9  -3 -12   37.36    1.62
  -9  -3  12   36.91    1.69
  -9   3  12   36.22    1.87
  -3  -8  -5   81.12    2.59
   3   8   5   75.83    2.66
   3  -8   5   74.72    2.36
   1   8   6   -0.06    0.71
  -1  -8  -6    0.41    0.59
   1  -8   6    0.20    0.55
   1  -8   6    0.05    0.63
  -2  -9   4   10.49    0.90
   2  -9  -4    9.06    0.83
  -2   9   4    9.43    1.01
   9   0   7    0.14    0.47
   9   0   7    0.46    0.65
  16   0  -4  204.95    4.34
  16   0  -4  205.11    4.67
  14  -3   0   98.46    2.97
 -14  -3   0   98.92    3.27
  14   3   0   96.56    2.87
  14  -3   0   95.39    2.80
 -12   1  -4    0.44    0.69
  12   1   4    0.03    0.46
  12  -1   4    0.15    0.52
  12  -1   4    0.22    0.63
 -12  -1  -4   -0.14    0.73
   6  -6 -10  334.08    6.96
  -6  -6  10  357.76    7.47
  -6   6  10  351.05    7.70
  -6   6  10  349.27    7.56
   3   9   2    9.81    1.04
   3  -9   2    9.83    0.80
   3  -9   2    9.69    0.92
  -3   9  -2   10.09    0.79
  -3  -9  -2    8.56    1.06
   4  -2  10    0.69    0.47
   4  -2  10    0.86    0.64
   4   2  10    0.52    0.42
   4   2  10    0.06    0.63
  12  -5   1  208.34    4.74
  12  -5   1  198.46    4.76
 -12  -5  -1  212.69    5.29
  12   5   1  206.52    4.73
 -12   5  -1  207.66    5.15
   3   6   8   59.94    2.22
   3   6   8   56.67    2.35
   3  -6   8   56.96    1.99
   3   6   8   56.06    1.67
  -3  -6  -8   57.61    2.29
  16  -1  -5  155.73    3.62
  16   1  -5  155.98    3.71
  16  -1  -5  153.06    3.77
   5  -9  -2  103.39    2.92
  -5   9   2  100.12    2.85
  -5  -9   2  101.82    2.94
  -6   0  13    0.30    0.46
  -6   0  13    0.43    0.55
   4   9   1   86.33    2.72
   4  -9   1   88.87    2.67
   4   9   1   90.02    2.59
  -4   9  -1   86.86    2.37
   4  -9   1   84.03    2.28
  -4  -9  -1   88.62    2.70
 -14   3   9  176.43    4.75
  14  -3  -9  172.55    4.15
 -14   3   9  167.08    4.97
 -14  -3   9  177.62    4.13
  14  -3  -9  171.43    3.91
  -8  -7   8    2.55    0.72
  -8   7   8    2.50    0.79
  -8   7   8    3.83    0.95
   8  -7  -8    2.54    0.67
  12  -4 -10    9.11    0.92
 -12  -4  10   10.11    0.94
 -12   4  10    9.99    1.24
 -13  -5   1   48.97    2.22
  13  -5  -1   43.64    1.82
  13   5  -1   46.32    1.74
  13  -5  -1   47.81    1.96
 -13   5   1   47.75    2.27
  -1  -9   4    0.49    0.51
  -1   9   4    0.66    0.64
  -5   9   1   15.56    1.04
   5  -9  -1   14.79    1.11
  -5  -9   1   13.98    1.09
  -7  -8   6   59.77    2.21
  -7   8   6   63.32    2.36
   7  -8  -6   61.54    2.19
  -7   0  13   -0.46    0.67
  -7   0  13   -0.18    0.47
  -8   8   5    6.83    0.86
  -8   8   5    7.51    1.14
   8  -8  -5    6.09    0.84
  -8  -8   5    7.51    0.91
  -3   9   4   29.44    1.57
   3  -9  -4   31.70    1.44
  -3  -9   4   32.46    1.52
   1   3  11  104.79    2.70
   1   3  11  105.75    3.29
   1  -3  11  101.95    2.71
  -4   5  11  167.92    4.40
   4  -5 -11  174.47    4.07
  -4  -5  11  165.00    3.63
  15   3  -7   81.88    2.11
  15  -3  -7   81.53    2.45
  15  -3  -7   81.37    2.52
 -15  -3   7   79.74    2.48
   3  -8  -7   12.37    0.95
  -3  -8   7   12.73    1.13
  10   7   0  216.56    4.70
 -10  -7   0  213.14    5.26
 -10   7   0  215.90    5.31
  10  -7   0  222.37    4.75
  10  -7   0  209.28    5.03
  15  -1  -9    0.10    0.50
  15  -1  -9    0.04    0.51
  15   1  -9   -0.20    0.39
  15   1  -9    0.35    0.40
  -4  -8   7    2.75    0.73
  -4   8   7    2.95    0.78
   4  -8  -7    2.89    0.64
  16   1  -6  134.00    3.29
  16  -1  -6  136.74    3.32
  16  -1  -6  138.97    3.44
  -1  -2  12   18.52    1.02
  -1   2  12   17.77    1.33
   8   8   0    5.50    0.69
   8  -8   0    4.32    0.66
  -8  -8   0    5.57    0.99
   8  -8   0    4.61    0.84
  -8   8   0    4.66    0.92
   7  -5 -11    3.76    0.71
  -7   5  11    4.29    0.88
  -7  -5  11    4.51    0.84
  -7   5  11    3.47    0.90
   6   4   8    0.96    0.40
   6  -4   8    0.64    0.54
  -6  -4  -8    0.48    0.72
   6   4   8    0.45    0.65
   6  -4   8    1.11    0.55
   6   4   8    0.12    0.70
   7   7   4    0.05    0.68
   7  -7   4    0.34    0.64
  -7  -7  -4    0.19    0.79
   7   7   4   -0.11    0.56
  -5   0  13    0.52    0.45
   9  -1   7   67.70    2.45
   9   1   7   65.99    1.94
   9   1   7   68.01    2.48
   9  -1   7   65.66    2.07
  16  -1  -4   91.57    2.73
  16   1  -4   86.78    2.66
  16  -1  -4   90.98    2.53
 -16  -1   4   92.44    2.88
   3   5   9    4.72    0.93
   3   5   9    4.47    0.82
   3   5   9    5.10    0.55
   3  -5   9    4.74    0.69
  -3  -5  -9    5.77    0.94
  -3  -6  10   35.84    1.34
[truncated: 96,792 more chars]
