# Supplementary material for: Rationalisation of Patterns of Competing Reactivity by X-ray Structure Determination: Reaction of Isomeric (Benzyloxythienyl)oxazolines with a Base
Source: Molecules. 2021 Dec 20;26(24):7690. doi: 10.3390/molecules26247690 (PMC8705950; doi:10.3390/molecules26247690)
Supplement: Supplementary file 1 [file molecules-26-07690-s001.zip › 21Mol supp mater/cpd 13.cif]

data_13
_audit_creation_date                               2017-05-31
_audit_creation_method                            'by CrystalStructure 4.2'

_publ_section_references
;
    ENTER OTHER REFERENCES

    Rigaku (2015). CrystalStructure. Version 4.2. 
    Rigaku Corporation, Tokyo, Japan.

    Burla, M. C., Caliandro, R., Camalli, M., Carrozzini, B., 
    Cascarano, G. L., Giacovazzo, C., Mallamo, M., Mazzone, A., 
    Polidori, G. and Spagna, R. 
    (2012). J. Appl. Cryst. 45, 357-361.
    SIR2011

    Sheldrick, G.M. (2008) SHELXL Version 2014/7, Acta Cryst. A64, 112-122.

    Rigaku Oxford Diffraction (2015), CrysAlisPro. version 1.171.38.41.
    Rigaku Corporation, Tokyo, Japan

;


_chemical_formula_sum                             'C16 H17 N O2 S'
_chemical_formula_moiety                          'C16 H17 N O2 S'
_chemical_formula_weight                           287.38
_chemical_melting_point                            ?

#==============================================================================
# CRYSTAL DATA
_space_group_crystal_system                        monoclinic
_space_group_name_H-M_alt                         'P 1 21/c 1'
_space_group_name_Hall                            '-P 2ybc'
_space_group_IT_number                             14
loop_
_space_group_symop_id
_space_group_symop_operation_xyz
1   '+X,+Y,+Z'
2   '-X,1/2+Y,1/2-Z'
3   '-X,-Y,-Z'
4   '+X,-1/2-Y,-1/2+Z'
#------------------------------------------------------------------------------
_cell_length_a                                     15.6319(4)
_cell_length_b                                     8.7152(3)
_cell_length_c                                     10.7572(3)
_cell_angle_alpha                                  90.0000
_cell_angle_beta                                   93.909(3)
_cell_angle_gamma                                  90.0000
_cell_volume                                       1462.10(7)
_cell_formula_units_Z                              4
_cell_measurement_reflns_used                      10077
_cell_measurement_theta_min                        2.59
_cell_measurement_theta_max                        28.36
_cell_measurement_temperature                      296
#------------------------------------------------------------------------------
_exptl_crystal_description                         plate
_exptl_crystal_colour                              colourless
_exptl_crystal_size_max                            0.200
_exptl_crystal_size_mid                            0.200
_exptl_crystal_size_min                            0.010
_exptl_crystal_density_diffrn                      1.305
_exptl_crystal_density_meas                        ?
_exptl_crystal_density_method                     'not measured'
_exptl_crystal_F_000                               608.00
_exptl_absorpt_coefficient_mu                      0.222
_exptl_absorpt_correction_type                     multi-scan
_exptl_absorpt_process_details
;
CrysAlisPro 1.171.38.41 (Rigaku Oxford Diffraction, 2015)
Empirical absorption correction using spherical harmonics,
 implemented in SCALE3 ABSPACK scaling algorithm.
;
_exptl_absorpt_correction_T_min                    0.731
_exptl_absorpt_correction_T_max                    0.998

#==============================================================================
# EXPERIMENTAL DATA

_diffrn_ambient_temperature                        296
_diffrn_radiation_type                            'Mo K\a'
_diffrn_radiation_wavelength                       0.71075
_diffrn_measurement_device_type                   'Rigaku XtaLAB P200'
_diffrn_measurement_method                         \w
_diffrn_detector_area_resol_mean                   5.811
_diffrn_reflns_number                              17910
_diffrn_reflns_av_R_equivalents                    0.0399
_diffrn_reflns_theta_max                           28.355
_diffrn_reflns_theta_min                           2.612
_diffrn_reflns_theta_full                          25.242
_diffrn_measured_fraction_theta_max                0.878
_diffrn_measured_fraction_theta_full               1.000
_diffrn_reflns_Laue_measured_fraction_max          0.878
_diffrn_reflns_Laue_measured_fraction_full         1.000
_diffrn_reflns_point_group_measured_fraction_max   0.878
_diffrn_reflns_point_group_measured_fraction_full  1.000
_diffrn_reflns_limit_h_min                        -18
_diffrn_reflns_limit_h_max                         20
_diffrn_reflns_limit_k_min                        -11
_diffrn_reflns_limit_k_max                         11
_diffrn_reflns_limit_l_min                        -14
_diffrn_reflns_limit_l_max                         14
_diffrn_standards_number                           0
_diffrn_standards_interval_count                   .
_diffrn_standards_decay_%                          ?
_reflns_number_total                               3217
_reflns_number_gt                                  2781
_reflns_threshold_expression                       F^2^>2.0\s(F^2^)
_reflns_Friedel_coverage          0.000
_reflns_Friedel_fraction_max      .
_reflns_Friedel_fraction_full     .

#==============================================================================
# REFINEMENT DATA

_refine_special_details
;
    Refinement was performed using all reflections. The weighted 
    R-factor (wR) and goodness of fit (S) are based on F^2^.
    R-factor (gt) are based on F. The threshold expression of
    F^2^ > 2.0 sigma(F^2^) is used only for calculating R-factor (gt).
;
_refine_ls_structure_factor_coef                   Fsqd
_refine_ls_R_factor_all                            0.0402
_refine_ls_R_factor_gt                             0.0333
_refine_ls_wR_factor_ref                           0.0917
_refine_ls_wR_factor_gt                            0.0888
_refine_ls_number_restraints                       0
_refine_ls_hydrogen_treatment                      constr
_refine_ls_number_reflns                           3217
_refine_ls_number_parameters                       181
_refine_ls_goodness_of_fit_ref                     1.054
_refine_ls_weighting_scheme                        calc
_refine_ls_weighting_details
           'w = 1/[\s^2^(Fo^2^)+(0.0480P)^2^+0.4117P] where P=(Fo^2^+2Fc^2^)/3'
_atom_sites_solution_hydrogens                     geom
_atom_sites_solution_primary                       direct
_atom_sites_solution_secondary                     difmap
_refine_ls_shift/su_max                            0.001
_refine_diff_density_max                           0.32
_refine_diff_density_min                          -0.30
_refine_ls_extinction_method                       none
_refine_ls_extinction_coef                         ?

loop_
_atom_type_symbol
_atom_type_description
_atom_type_scat_dispersion_real
_atom_type_scat_dispersion_imag
_atom_type_scat_source
  'C' 'C'  0.0033 0.0016 
;
International Tables for Crystallography
(Vol. C, Tables 4.2.6.8 and 6.1.1.4)
;
  'H' 'H'  0.0000 0.0000 
;
International Tables for Crystallography
(Vol. C, Table 6.1.1.4)
;
  'N' 'N'  0.0061 0.0033 
;
International Tables for Crystallography
(Vol. C, Tables 4.2.6.8 and 6.1.1.4)
;
  'O' 'O'  0.0106 0.0060 
;
International Tables for Crystallography
(Vol. C, Tables 4.2.6.8 and 6.1.1.4)
;
  'S' 'S'  0.1246 0.1234 
;
International Tables for Crystallography
(Vol. C, Tables 4.2.6.8 and 6.1.1.4)
;

#==============================================================================
# ATOMIC COORDINATES AND THERMAL PARAMETERS

loop_
 _atom_site_label
 _atom_site_type_symbol
 _atom_site_fract_x
 _atom_site_fract_y
 _atom_site_fract_z
 _atom_site_U_iso_or_equiv
 _atom_site_adp_type
 _atom_site_occupancy
 _atom_site_site_symmetry_order  
 _atom_site_calc_flag
 _atom_site_refinement_flags_posn
 _atom_site_refinement_flags_adp
 _atom_site_refinement_flags_occupancy
 _atom_site_disorder_assembly
 _atom_site_disorder_group
S8 S 0.49547(2) 0.69594(4) 0.54100(3) 0.02310(12) Uani 1 1 d . . . . .
O1 O 0.37580(6) 1.11495(11) 0.69894(8) 0.0217(2) Uani 1 1 d . . . . .
O11 O 0.28450(5) 0.85479(11) 0.37790(8) 0.0193(2) Uani 1 1 d . . . . .
N3 N 0.28108(6) 1.12242(12) 0.52888(9) 0.0168(2) Uani 1 1 d . . . . .
C2 C 0.34437(7) 1.05581(15) 0.58599(11) 0.0156(3) Uani 1 1 d . . . . .
C4 C 0.25610(8) 1.25126(15) 0.60918(11) 0.0178(3) Uani 1 1 d . . . . .
C5 C 0.33172(9) 1.26143(16) 0.70834(12) 0.0216(3) Uani 1 1 d . . . . .
H5A H 0.3694 1.3461 0.6909 0.026 Uiso 1 1 calc R U . . .
H5B H 0.3114 1.2751 0.7908 0.026 Uiso 1 1 calc R U . . .
C6 C 0.38796(7) 0.91701(15) 0.54731(11) 0.0161(3) Uani 1 1 d . . . . .
C7 C 0.46231(8) 0.86226(16) 0.60610(12) 0.0200(3) Uani 1 1 d . . . . .
H7 H 0.4913 0.9103 0.6737 0.024 Uiso 1 1 calc R U . . .
C9 C 0.41009(8) 0.69547(15) 0.43115(12) 0.0199(3) Uani 1 1 d . . . . .
H9 H 0.4006 0.6208 0.3700 0.024 Uiso 1 1 calc R U . . .
C10 C 0.35823(8) 0.81906(15) 0.44562(11) 0.0165(3) Uani 1 1 d . . . . .
C12 C 0.25458(8) 0.74337(15) 0.28776(12) 0.0210(3) Uani 1 1 d . . . . .
H12A H 0.2503 0.6438 0.3271 0.025 Uiso 1 1 calc R U . . .
H12B H 0.2945 0.7352 0.2229 0.025 Uiso 1 1 calc R U . . .
C13 C 0.16783(8) 0.79298(14) 0.23231(11) 0.0163(3) Uani 1 1 d . . . . .
C14 C 0.11949(8) 0.90345(15) 0.28878(11) 0.0190(3) Uani 1 1 d . . . . .
H14 H 0.1409 0.9499 0.3623 0.023 Uiso 1 1 calc R U . . .
C15 C 0.03908(8) 0.94479(16) 0.23568(12) 0.0219(3) Uani 1 1 d . . . . .
H15 H 0.0067 1.0184 0.2740 0.026 Uiso 1 1 calc R U . . .
C16 C 0.00717(8) 0.87634(17) 0.12573(12) 0.0240(3) Uani 1 1 d . . . . .
H16 H -0.0468 0.9032 0.0908 0.029 Uiso 1 1 calc R U . . .
C17 C 0.05570(8) 0.76788(17) 0.06791(12) 0.0237(3) Uani 1 1 d . . . . .
H17 H 0.0346 0.7233 -0.0065 0.028 Uiso 1 1 calc R U . . .
C18 C 0.13590(8) 0.72538(15) 0.12080(12) 0.0192(3) Uani 1 1 d . . . . .
H18 H 0.1682 0.6521 0.0820 0.023 Uiso 1 1 calc R U . . .
C19 C 0.24558(9) 1.39720(16) 0.53209(12) 0.0241(3) Uani 1 1 d . . . . .
H19A H 0.2294 1.4801 0.5844 0.029 Uiso 1 1 calc R U . . .
H19B H 0.2988 1.4214 0.4971 0.029 Uiso 1 1 calc R U . . .
H19C H 0.2018 1.3821 0.4662 0.029 Uiso 1 1 calc R U . . .
C20 C 0.17244(8) 1.20644(16) 0.66600(13) 0.0251(3) Uani 1 1 d . . . . .
H20A H 0.1548 1.2880 0.7185 0.030 Uiso 1 1 calc R U . . .
H20B H 0.1287 1.1885 0.6005 0.030 Uiso 1 1 calc R U . . .
H20C H 0.1814 1.1147 0.7146 0.030 Uiso 1 1 calc R U . . .

loop_
 _atom_site_aniso_label
 _atom_site_aniso_U_11
 _atom_site_aniso_U_22
 _atom_site_aniso_U_33
 _atom_site_aniso_U_23
 _atom_site_aniso_U_13
 _atom_site_aniso_U_12
S8 0.01842(18) 0.0257(2) 0.02486(18) 0.00063(14) -0.00055(13) 0.00849(13)
O1 0.0239(5) 0.0246(5) 0.0160(4) -0.0038(4) -0.0040(4) 0.0036(4)
O11 0.0192(4) 0.0182(5) 0.0196(4) -0.0047(4) -0.0046(4) 0.0046(4)
N3 0.0162(5) 0.0173(6) 0.0167(5) -0.0030(4) 0.0008(4) 0.0017(4)
C2 0.0147(6) 0.0191(7) 0.0131(5) -0.0006(5) 0.0017(4) -0.0034(5)
C4 0.0189(6) 0.0169(6) 0.0178(6) -0.0049(5) 0.0020(5) 0.0013(5)
C5 0.0245(7) 0.0218(7) 0.0184(6) -0.0049(5) 0.0005(5) 0.0010(5)
C6 0.0145(6) 0.0189(7) 0.0153(6) 0.0025(5) 0.0034(4) 0.0003(5)
C7 0.0165(6) 0.0251(7) 0.0183(6) 0.0000(5) 0.0009(5) 0.0019(5)
C9 0.0207(6) 0.0208(7) 0.0183(6) 0.0000(5) 0.0011(5) 0.0036(5)
C10 0.0145(6) 0.0191(7) 0.0161(6) 0.0027(5) 0.0026(5) 0.0009(5)
C12 0.0245(6) 0.0179(7) 0.0200(6) -0.0044(5) -0.0032(5) 0.0051(5)
C13 0.0178(6) 0.0159(6) 0.0153(5) 0.0035(5) 0.0013(5) -0.0015(5)
C14 0.0223(6) 0.0195(7) 0.0153(6) 0.0015(5) 0.0018(5) 0.0003(5)
C15 0.0193(6) 0.0240(7) 0.0232(6) 0.0024(5) 0.0063(5) 0.0031(5)
C16 0.0161(6) 0.0311(8) 0.0244(6) 0.0049(6) -0.0004(5) -0.0008(6)
C17 0.0219(6) 0.0293(8) 0.0195(6) -0.0008(6) -0.0016(5) -0.0046(6)
C18 0.0211(6) 0.0178(7) 0.0189(6) -0.0015(5) 0.0028(5) -0.0015(5)
C19 0.0288(7) 0.0214(7) 0.0226(6) -0.0018(5) 0.0040(5) 0.0045(6)
C20 0.0222(7) 0.0224(7) 0.0314(7) -0.0025(6) 0.0086(6) 0.0019(6)

#==============================================================================
_computing_data_collection
                                    'CrysAlisPro 1.171.38.41 (Rigaku OD, 2015)'
_computing_cell_refinement
                                    'CrysAlisPro 1.171.38.41 (Rigaku OD, 2015)'
_computing_data_reduction
                                    'CrysAlisPro 1.171.38.41 (Rigaku OD, 2015)'
_computing_structure_solution
                                                'SIR2011 (Burla, et al., 2012)'
_computing_structure_refinement
                                      'SHELXL Version 2014/7 (Sheldrick, 2008)'
_computing_publication_material
                                          'CrystalStructure 4.2 (Rigaku, 2015)'
_computing_molecular_graphics                     'CrystalStructure 4.2'

#==============================================================================
# MOLECULAR GEOMETRY

_geom_special_details
;
 All esds (except the esd in the dihedral angle between two l.s. planes)
 are estimated using the full covariance matrix.  The cell esds are taken
 into account individually in the estimation of esds in distances, angles
 and torsion angles; correlations between esds in cell parameters are only
 used when they are defined by crystal symmetry.  An approximate (isotropic)
 treatment of cell esds is used for estimating esds involving l.s. planes.
;

loop_
 _geom_bond_atom_site_label_1
 _geom_bond_atom_site_label_2
 _geom_bond_distance
 _geom_bond_site_symmetry_2
 _geom_bond_publ_flag
S8 C7 1.7057(14) . ?
S8 C9 1.7212(13) . ?
O1 C2 1.3791(14) . ?
O1 C5 1.4574(16) . ?
O11 C10 1.3570(14) . ?
O11 C12 1.4283(15) . ?
N3 C2 1.2690(15) . ?
N3 C4 1.4851(16) . ?
C2 C6 1.4627(17) . ?
C4 C19 1.5212(19) . ?
C4 C20 1.5314(18) . ?
C4 C5 1.5398(18) . ?
C5 H5A 0.9700 . ?
C5 H5B 0.9700 . ?
C6 C7 1.3705(17) . ?
C6 C10 1.4395(17) . ?
C7 H7 0.9300 . ?
C9 C10 1.3634(18) . ?
C9 H9 0.9300 . ?
C12 C13 1.5072(17) . ?
C12 H12A 0.9700 . ?
C12 H12B 0.9700 . ?
C13 C14 1.3891(18) . ?
C13 C18 1.3977(18) . ?
C14 C15 1.3922(18) . ?
C14 H14 0.9300 . ?
C15 C16 1.3867(19) . ?
C15 H15 0.9300 . ?
C16 C17 1.386(2) . ?
C16 H16 0.9300 . ?
C17 C18 1.3913(18) . ?
C17 H17 0.9300 . ?
C18 H18 0.9300 . ?
C19 H19A 0.9600 . ?
C19 H19B 0.9600 . ?
C19 H19C 0.9600 . ?
C20 H20A 0.9600 . ?
C20 H20B 0.9600 . ?
C20 H20C 0.9600 . ?

loop_
 _geom_angle_atom_site_label_1
 _geom_angle_atom_site_label_2
 _geom_angle_atom_site_label_3
 _geom_angle
 _geom_angle_site_symmetry_1
 _geom_angle_site_symmetry_3
 _geom_angle_publ_flag
C7 S8 C9 92.34(6) . . ?
C2 O1 C5 104.29(9) . . ?
C10 O11 C12 115.80(10) . . ?
C2 N3 C4 106.94(10) . . ?
N3 C2 O1 118.34(11) . . ?
N3 C2 C6 127.12(11) . . ?
O1 C2 C6 114.51(10) . . ?
N3 C4 C19 109.76(10) . . ?
N3 C4 C20 107.75(10) . . ?
C19 C4 C20 111.54(11) . . ?
N3 C4 C5 103.10(10) . . ?
C19 C4 C5 112.27(11) . . ?
C20 C4 C5 111.98(11) . . ?
O1 C5 C4 104.22(10) . . ?
O1 C5 H5A 110.9 . . ?
C4 C5 H5A 110.9 . . ?
O1 C5 H5B 110.9 . . ?
C4 C5 H5B 110.9 . . ?
H5A C5 H5B 108.9 . . ?
C7 C6 C10 111.34(11) . . ?
C7 C6 C2 123.61(11) . . ?
C10 C6 C2 125.03(11) . . ?
C6 C7 S8 112.23(10) . . ?
C6 C7 H7 123.9 . . ?
S8 C7 H7 123.9 . . ?
C10 C9 S8 111.04(10) . . ?
C10 C9 H9 124.5 . . ?
S8 C9 H9 124.5 . . ?
O11 C10 C9 127.58(12) . . ?
O11 C10 C6 119.36(11) . . ?
C9 C10 C6 113.05(11) . . ?
O11 C12 C13 108.53(10) . . ?
O11 C12 H12A 110.0 . . ?
C13 C12 H12A 110.0 . . ?
O11 C12 H12B 110.0 . . ?
C13 C12 H12B 110.0 . . ?
H12A C12 H12B 108.4 . . ?
C14 C13 C18 119.63(11) . . ?
C14 C13 C12 121.83(11) . . ?
C18 C13 C12 118.54(11) . . ?
C13 C14 C15 120.19(12) . . ?
C13 C14 H14 119.9 . . ?
C15 C14 H14 119.9 . . ?
C16 C15 C14 120.05(12) . . ?
C16 C15 H15 120.0 . . ?
C14 C15 H15 120.0 . . ?
C15 C16 C17 120.01(12) . . ?
C15 C16 H16 120.0 . . ?
C17 C16 H16 120.0 . . ?
C16 C17 C18 120.25(12) . . ?
C16 C17 H17 119.9 . . ?
C18 C17 H17 119.9 . . ?
C17 C18 C13 119.86(12) . . ?
C17 C18 H18 120.1 . . ?
C13 C18 H18 120.1 . . ?
C4 C19 H19A 109.5 . . ?
C4 C19 H19B 109.5 . . ?
H19A C19 H19B 109.5 . . ?
C4 C19 H19C 109.5 . . ?
H19A C19 H19C 109.5 . . ?
H19B C19 H19C 109.5 . . ?
C4 C20 H20A 109.5 . . ?
C4 C20 H20B 109.5 . . ?
H20A C20 H20B 109.5 . . ?
C4 C20 H20C 109.5 . . ?
H20A C20 H20C 109.5 . . ?
H20B C20 H20C 109.5 . . ?

loop_
 _geom_torsion_atom_site_label_1
 _geom_torsion_atom_site_label_2
 _geom_torsion_atom_site_label_3
 _geom_torsion_atom_site_label_4
 _geom_torsion
 _geom_torsion_site_symmetry_1
 _geom_torsion_site_symmetry_2
 _geom_torsion_site_symmetry_3
 _geom_torsion_site_symmetry_4
 _geom_torsion_publ_flag
C4 N3 C2 O1 -1.97(15) . . . . ?
C4 N3 C2 C6 176.08(11) . . . . ?
C5 O1 C2 N3 -9.62(14) . . . . ?
C5 O1 C2 C6 172.10(10) . . . . ?
C2 N3 C4 C19 131.77(11) . . . . ?
C2 N3 C4 C20 -106.58(12) . . . . ?
C2 N3 C4 C5 11.97(13) . . . . ?
C2 O1 C5 C4 15.98(12) . . . . ?
N3 C4 C5 O1 -17.05(12) . . . . ?
C19 C4 C5 O1 -135.11(11) . . . . ?
C20 C4 C5 O1 98.51(12) . . . . ?
N3 C2 C6 C7 171.80(12) . . . . ?
O1 C2 C6 C7 -10.10(17) . . . . ?
N3 C2 C6 C10 -9.6(2) . . . . ?
O1 C2 C6 C10 168.56(11) . . . . ?
C10 C6 C7 S8 -0.32(14) . . . . ?
C2 C6 C7 S8 178.50(9) . . . . ?
C9 S8 C7 C6 0.37(10) . . . . ?
C7 S8 C9 C10 -0.32(10) . . . . ?
C12 O11 C10 C9 5.41(18) . . . . ?
C12 O11 C10 C6 -173.42(11) . . . . ?
S8 C9 C10 O11 -178.70(10) . . . . ?
S8 C9 C10 C6 0.20(14) . . . . ?
C7 C6 C10 O11 179.07(10) . . . . ?
C2 C6 C10 O11 0.28(18) . . . . ?
C7 C6 C10 C9 0.07(15) . . . . ?
C2 C6 C10 C9 -178.72(11) . . . . ?
C10 O11 C12 C13 173.61(10) . . . . ?
O11 C12 C13 C14 -16.36(16) . . . . ?
O11 C12 C13 C18 163.50(11) . . . . ?
C18 C13 C14 C15 1.05(19) . . . . ?
C12 C13 C14 C15 -179.10(12) . . . . ?
C13 C14 C15 C16 -0.36(19) . . . . ?
C14 C15 C16 C17 -0.7(2) . . . . ?
C15 C16 C17 C18 1.0(2) . . . . ?
C16 C17 C18 C13 -0.4(2) . . . . ?
C14 C13 C18 C17 -0.68(19) . . . . ?
C12 C13 C18 C17 179.45(11) . . . . ?

#==============================================================================

#==============================================================================
# Additional structures and associated data_? identifiers
# should be added at this point if there is more than one 
# structure analysis in the CIF.

_shelx_res_file
;

    shelxl.res created by SHELXL-2014/7

TITL AHAA20
CELL  0.71075 15.63190 8.71520 10.75720 90.00000 93.90900 90.00000
ZERR  4 0.00040 0.00030 0.00030 0.00000 0.00300 0.00000
LATT 1
SYMM    -X, .50+Y, .50-Z
SFAC C H N O S
UNIT 64 68 4 8 4
L.S. 20
FMAP 2
PLAN 5
WPDB -2
HTAB
BOND $H
CONF
LIST 4
TEMP 23.0
ACTA
SIZE 0.200 0.200 0.010
WGHT    0.048000    0.411700
FVAR       1.11386
S8    5    0.495471    0.695944    0.540997    11.00000    0.01842    0.02573 =
         0.02486    0.00063   -0.00055    0.00849
O1    4    0.375796    1.114954    0.698936    11.00000    0.02387    0.02461 =
         0.01601   -0.00381   -0.00402    0.00361
O11   4    0.284496    0.854793    0.377901    11.00000    0.01919    0.01820 =
         0.01960   -0.00474   -0.00461    0.00461
N3    3    0.281079    1.122419    0.528876    11.00000    0.01621    0.01735 =
         0.01674   -0.00303    0.00077    0.00172
C2    1    0.344367    1.055810    0.585993    11.00000    0.01469    0.01910 =
         0.01314   -0.00059    0.00171   -0.00342
C4    1    0.256102    1.251256    0.609184    11.00000    0.01890    0.01692 =
         0.01775   -0.00489    0.00204    0.00131
C5    1    0.331716    1.261428    0.708344    11.00000    0.02452    0.02179 =
         0.01841   -0.00494    0.00050    0.00100
AFIX  23
H5A   2    0.369357    1.346089    0.690899    11.00000   -1.20000
H5B   2    0.311388    1.275084    0.790830    11.00000   -1.20000
AFIX   0
C6    1    0.387963    0.917009    0.547310    11.00000    0.01453    0.01888 =
         0.01532    0.00245    0.00338    0.00033
C7    1    0.462310    0.862256    0.606101    11.00000    0.01646    0.02511 =
         0.01829    0.00002    0.00094    0.00190
AFIX  43
H7    2    0.491342    0.910253    0.673712    11.00000   -1.20000
AFIX   0
C9    1    0.410092    0.695472    0.431146    11.00000    0.02071    0.02081 =
         0.01826   -0.00004    0.00114    0.00359
AFIX  43
H9    2    0.400592    0.620791    0.370007    11.00000   -1.20000
AFIX   0
C10   1    0.358229    0.819065    0.445617    11.00000    0.01454    0.01906 =
         0.01614    0.00267    0.00258    0.00094
C12   1    0.254583    0.743367    0.287764    11.00000    0.02455    0.01791 =
         0.02004   -0.00445   -0.00316    0.00511
AFIX  23
H12A  2    0.250263    0.643758    0.327076    11.00000   -1.20000
H12B  2    0.294491    0.735155    0.222876    11.00000   -1.20000
AFIX   0
C13   1    0.167828    0.792983    0.232308    11.00000    0.01779    0.01593 =
         0.01526    0.00349    0.00126   -0.00154
C14   1    0.119488    0.903449    0.288779    11.00000    0.02233    0.01950 =
         0.01531    0.00153    0.00179    0.00027
AFIX  43
H14   2    0.140900    0.949922    0.362265    11.00000   -1.20000
AFIX   0
C15   1    0.039075    0.944791    0.235680    11.00000    0.01931    0.02401 =
         0.02317    0.00237    0.00633    0.00307
AFIX  43
H15   2    0.006733    1.018370    0.273973    11.00000   -1.20000
AFIX   0
C16   1    0.007168    0.876341    0.125734    11.00000    0.01609    0.03114 =
         0.02444    0.00485   -0.00041   -0.00082
AFIX  43
H16   2   -0.046811    0.903232    0.090800    11.00000   -1.20000
AFIX   0
C17   1    0.055695    0.767885    0.067909    11.00000    0.02187    0.02935 =
         0.01955   -0.00082   -0.00161   -0.00458
AFIX  43
H17   2    0.034571    0.723343   -0.006530    11.00000   -1.20000
AFIX   0
C18   1    0.135901    0.725378    0.120797    11.00000    0.02105    0.01782 =
         0.01888   -0.00152    0.00282   -0.00151
AFIX  43
H18   2    0.168202    0.652140    0.082037    11.00000   -1.20000
AFIX   0
C19   1    0.245577    1.397204    0.532091    11.00000    0.02879    0.02136 =
         0.02261   -0.00177    0.00405    0.00450
AFIX  33
H19A  2    0.229438    1.480148    0.584353    11.00000   -1.20000
H19B  2    0.298815    1.421446    0.497101    11.00000   -1.20000
H19C  2    0.201836    1.382120    0.466166    11.00000   -1.20000
AFIX   0
C20   1    0.172441    1.206445    0.666000    11.00000    0.02224    0.02245 =
         0.03144   -0.00253    0.00859    0.00189
AFIX  33
H20A  2    0.154804    1.288004    0.718513    11.00000   -1.20000
H20B  2    0.128722    1.188536    0.600544    11.00000   -1.20000
H20C  2    0.181354    1.114704    0.714558    11.00000   -1.20000
AFIX   0
HKLF 4

REM  AHAA20
REM R1 =  0.0333 for    2781 Fo > 4sig(Fo)  and  0.0402 for all    3217 data
REM    181 parameters refined using      0 restraints

END

WGHT      0.0445      0.4459

REM No hydrogen bonds found for HTAB generation

REM Highest difference peak  0.317,  deepest hole -0.300,  1-sigma level  0.045
Q1    1   0.3685  0.8675  0.5014  11.00000  0.05    0.32
Q2    1   0.2935  1.2648  0.6581  11.00000  0.05    0.30
Q3    1   0.2060  0.7699  0.2541  11.00000  0.05    0.29
Q4    1   0.4462  0.6991  0.4876  11.00000  0.05    0.29
Q5    1   0.2191  1.2282  0.6373  11.00000  0.05    0.28
;

_shelx_res_checksum   41596

_shelx_hkl_file
;
   0   0  -1   -1.01    0.98
   0   0  -1    0.24    0.51
   0   0  -1   -1.09    0.92
   0   0   1   -0.08    0.38
   0   0  -1    1.49    1.87
   0   0   1   -0.86    1.59
   0   0   1   -1.12    1.52
   0   0   2 1864.74   90.08
   0   0   2 1736.90   88.61
   0   0   2 1821.97   90.49
   0   0  -2 2150.35   91.20
   0   0  -2 1959.28   88.70
   0   0  -2 1804.35   90.05
   0   0  -2 1766.88   89.97
   0   0   3    1.34    3.56
   0   0  -3    0.12    1.83
   0   0   3   -0.39    3.76
   0   0  -3   -1.78    5.29
   0   0  -4  371.03   21.13
   0   0  -4  405.85   25.26
   0   0  -5   -1.05    2.45
   0   0  -5    1.62    4.30
   0   0  -5    2.21    6.53
   0   0  -5   -1.17    5.79
   0   0   5    3.74    5.20
   0   0   5    2.36    1.81
   0   0   5   -0.54    5.08
   0   0  -6 2412.36  114.06
   0   0   6 2356.51  113.69
   0   0   6 1982.80  117.92
   0   0  -6 2729.65  121.03
   0   0  -6 2641.17  118.90
   0   0  -6 2233.25  117.25
   0   0   6 2208.77  117.11
   0   0  -7   -2.02    8.18
   0   0   7    5.85    5.66
   0   0   7   -1.11    2.20
   0   0   7    1.07    7.29
   0   0  -7    2.24    5.25
   0   0  -7   -1.63    6.50
   0   0  -7   -2.24    2.66
   0   0   8  329.69   24.01
   0   0  -8  320.97   24.04
   0   0   8  348.76   28.21
   0   0   8  371.90   20.15
   0   0   9    3.62    7.01
   0   0   9   -4.75   10.16
   0   0   9   -0.36    3.21
   0   0  -9    5.73    7.17
   0   0  10   16.48   12.67
   0   0  10   48.63    5.81
   0   0 -10   45.60   10.40
   0   0  10   38.97    9.65
   0   0  11   -0.92    4.00
   0   0 -11   -4.73    9.16
   0   0  11    2.16    7.57
   0   0  11    4.14   12.98
   0   0  12 2386.51  129.97
   0   0 -12 2246.88  119.75
   0   0  12 2292.44  112.42
   0   0  12 2097.69  117.83
   0   0  13    8.61   10.14
   0   0 -13   -4.26   11.25
   0   0  13    1.12    4.62
   0   0  14  132.40   12.01
   0   1   0    0.65    0.79
   0   1   0    1.72    2.02
   0  -1   0    2.37    1.62
   0  -1   0   -0.40    0.57
   0   1  -1 1806.58   88.98
   0   1   1 1802.90   88.65
   0   1   1 1840.98   88.27
   0   1  -1 1803.03   88.15
   0   1  -1 1842.64   87.06
   0   1  -1 1808.58   87.97
   0  -1   1 1792.36   87.87
   0  -1   1 1927.33   89.10
   0  -1   1 1730.27   88.21
   0  -1  -1 1840.30   88.80
   0   1  -2 1850.21   92.20
   0   1  -2 1877.90   90.51
   0   1  -2 1763.30   92.32
   0   1   2 1981.55   92.89
   0   1  -2 1935.95   93.71
   0   1   2 1932.51   91.99
   0  -1   2 1866.76   92.51
   0  -1   2 1820.10   92.05
   0  -1  -2 1988.14   92.94
   0  -1   2 2002.29   93.95
   0   1   3 1510.18   75.94
   0   1   3 1622.36   77.49
   0   1   3 1394.85   74.24
   0   1  -3 1493.15   76.57
   0   1  -3 1486.64   76.55
   0   1  -3 1599.82   74.05
   0   1  -3 1527.66   77.73
   0  -1   3 1512.63   76.25
   0  -1  -3 1595.23   73.88
   0  -1  -3 1633.48   76.41
   0  -1  -3 1672.96   77.47
   0  -1  -3 1446.06   75.38
   0  -1   3 1463.14   78.46
   0   1   4 4906.24  240.68
   0   1  -4 4859.67  236.09
   0   1  -4 4546.59  239.07
   0   1   4 4477.35  238.44
   0  -1  -4 4920.61  235.97
   0  -1   4 4599.50  241.66
   0  -1   4 4514.67  238.66
   0  -1   4 4879.29  236.18
   0  -1  -4 4238.96  237.84
   0  -1  -4 5089.92  239.09
   0  -1  -4 5148.79  240.37
   0   1   5    6.81    4.55
   0   1  -5   -0.70    6.30
   0   1  -5    5.61    2.14
   0   1   5    5.52    5.11
   0  -1  -5    6.20    5.79
   0  -1   5    1.65    4.10
   0  -1   5   12.86    7.72
   0  -1  -5    4.14    2.06
   0  -1  -5    2.80    6.33
   0  -1   5    4.11    1.69
   0  -1  -5   -0.96    4.14
   0   1   6  114.26   11.33
   0   1  -6  130.18   13.92
   0   1  -6  120.88   12.76
   0   1  -6  132.93    8.54
   0   1   6  115.39   13.32
   0   1   6  132.29    8.55
   0  -1   6  107.07   11.22
   0  -1   6  137.45   15.31
   0  -1  -6  152.89   14.01
   0  -1   6  134.84    8.48
   0  -1  -6  135.99    8.27
   0  -1  -6  122.60   11.01
   0  -1  -6  128.26   12.60
   0   1   7  170.36   14.77
   0   1  -7  183.49   16.36
   0   1   7  162.07   16.02
   0   1   7  168.76   11.12
   0   1  -7  194.30   11.46
   0  -1   7  174.68   18.61
   0  -1   7  180.72   11.14
   0  -1   7  176.94   14.73
   0  -1  -7  150.73   13.71
   0  -1  -7  190.72   11.01
   0  -1  -7  195.28   16.34
   0   1  -8  496.42   31.82
   0   1  -8  545.49   27.16
   0   1   8  500.02   31.25
   0   1   8  494.62   26.80
   0  -1  -8  555.95   33.25
   0  -1  -8  500.07   30.79
   0  -1   8  513.32   26.90
   0  -1   8  508.31   36.81
   0  -1  -8  561.50   26.67
   0  -1   8  453.39   30.64
   0   1   9   36.36    8.94
   0   1  -9   57.68   10.34
   0   1   9   32.65    9.84
   0   1   9   42.42    5.32
   0  -1   9   49.95    9.46
   0  -1  -9   60.30    9.73
   0  -1   9   53.20    5.64
   0  -1   9   57.67   14.35
   0   1  10   61.78   13.51
   0   1  10   80.88    7.74
   0   1 -10   95.59   13.26
   0   1  10   87.01   12.35
   0  -1 -10   79.84   11.77
   0  -1  10   79.74   12.06
   0  -1  10   88.55    7.94
   0  -1  10   99.11   19.41
   0   1  11  110.77   14.11
   0   1  11  108.22   18.94
   0   1  11  102.33    9.09
   0   1 -11  125.06   15.24
   0  -1 -11  125.84   14.85
   0  -1  11   95.20   13.95
   0  -1  11   89.12   19.31
   0  -1  11  112.53    9.48
   0   1  12   90.68    8.95
   0   1  12   57.72   12.40
   0   1  12   67.93   18.11
   0   1 -12   80.46   15.15
   0  -1  12   77.07    8.54
   0  -1  12   78.90   13.20
   0  -1  12   56.41   20.60
   0  -1 -12   68.41   13.11
   0   1 -13   60.32   13.82
   0   1  13   43.58    6.98
   0  -1  13   41.68   12.07
   0  -1  13   56.76    7.43
   0  -1 -13   57.39   13.40
   0  -1  14    3.07    5.36
   0  -1 -14    1.45   11.51
   0   2   027239.20 1333.39
   0   2   028263.80 1331.70
   0   2   028911.90 1332.01
   0  -2   026423.20 1333.22
   0  -2   027903.70 1331.97
   0   2   1 9495.83  458.19
   0   2  -1 9707.64  457.80
   0   2  -1 9347.16  456.75
   0   2   1 9873.33  456.96
   0   2   1 9035.35  459.73
   0   2  -1 9609.84  458.07
   0   2  -1 9645.23  459.46
   0   2   1 9823.51  458.86
   0  -2   1 9690.98  459.32
   0   2   2  230.85   15.55
   0   2  -2  242.15   17.06
   0   2  -2  241.06   14.56
   0   2   2  244.18   14.86
   0   2  -2  223.43   12.50
   0   2  -2  225.21   14.67
   0  -2  -2  256.52   15.38
   0  -2  -2  254.41   16.42
   0  -2   2  203.02   12.55
   0  -2   2  252.97   14.25
   0  -2  -2  250.65   11.74
   0  -2   2  269.44   17.04
   0   2  -3   -0.45    3.83
   0   2   3   -1.07    3.87
   0   2  -3    8.22    7.82
   0   2  -3   -0.13    1.86
   0   2   3    1.53    4.67
   0   2  -3    7.58    4.91
   0  -2  -3    4.00    5.45
   0  -2  -3    0.20    0.89
   0  -2  -3   -1.09    6.16
   0  -2   3   -4.54    4.14
   0  -2   3    7.95    7.23
   0  -2   3   -0.73    1.59
   0   2  -4   59.90   10.16
   0   2   4   64.38    8.30
   0   2  -4   54.38    7.27
   0   2   4   50.45    6.60
   0   2  -4   36.14    7.03
   0   2  -4   49.75    4.07
   0  -2  -4   47.21    8.44
   0  -2   4   60.84   10.19
   0  -2   4   52.39    6.45
   0  -2  -4   55.13    7.72
   0  -2   4   48.74    4.15
   0  -2  -4   44.12    5.44
   0  -2  -4   50.53    3.50
   0   2  -5  498.51   25.39
   0   2   5  524.59   31.02
   0   2  -5  506.43   31.34
   0   2  -5  446.03   29.24
   0   2  -5  464.57   29.56
   0   2   5  467.20   28.40
   0  -2   5  490.93   32.71
   0  -2  -5  533.54   30.96
   0  -2  -5  517.64   24.97
   0  -2   5  491.20   25.59
   0  -2  -5  443.99   27.17
   0  -2   5  482.85   28.70
   0  -2  -5  525.39   29.53
   0   2  -6  184.78   14.36
   0   2  -6  127.61   12.83
   0   2   6  159.41   15.11
   0   2  -6  146.27    9.06
   0   2   6  140.28   12.44
   0  -2   6  136.57    9.17
   0  -2  -6  173.68   15.49
   0  -2  -6  152.17    8.78
   0  -2   6  133.83   16.53
   0  -2   6  131.88   12.18
   0  -2  -6  147.03   13.41
   0  -2  -6  145.99   11.53
   0   2  -7  160.87   15.41
   0   2   7  163.71   11.21
   0   2   7  189.02   17.92
   0   2   7  170.46   14.51
   0   2  -7  168.73   10.93
   0  -2   7  164.04   14.60
   0  -2  -7  166.26   13.54
   0  -2  -7  207.86   10.86
   0  -2  -7  187.46   15.96
   0  -2   7  175.10   11.16
   0  -2   7  181.01   19.59
   0   2  -8  159.95   10.77
   0   2   8  161.35   17.70
   0   2   8  135.84   14.19
   0   2   8  158.88   10.99
   0  -2   8  155.14   20.12
   0  -2  -8  182.20   10.51
   0  -2  -8  125.59   12.97
   0  -2   8  134.95   14.07
   0  -2  -8  206.69   17.05
   0  -2   8  171.16   11.00
   0   2   9  149.63   15.06
   0   2   9  144.39   17.24
   0   2   9  156.20   11.28
   0  -2   9  162.04   11.10
   0  -2   9  160.63   15.32
   0  -2  -9  146.01   14.55
   0  -2   9  182.25   22.52
   0   2  10   55.06   10.49
   0   2  10   49.61    6.21
   0   2 -10   53.82   11.43
   0   2  10   82.70   12.27
   0  -2  10   43.74    6.03
   0  -2 -10   52.09    9.86
   0  -2  10   47.54   17.35
   0  -2  10   66.74   10.49
   0   2  11  137.88   18.18
   0   2 -11  137.48   17.98
   0   2  11  155.16   12.01
   0   2  11  166.61   16.75
   0  -2  11  164.35   12.00
   0  -2 -11  153.84   16.20
   0  -2  11  146.71   16.80
   0   2  12  495.73   28.21
   0   2  12  359.06   35.74
   0   2 -12  465.92   35.53
   0  -2  12  392.68   32.39
   0  -2  12  513.81   28.48
   0  -2 -12  510.12   33.98
   0   2  13   77.27    8.87
   0  -2 -13   63.35   13.16
   0  -2  13   78.89   14.14
   0  -2  13   98.71    9.72
   0  -2  14    4.34    5.42
   0   3   0    0.18    2.41
   0   3   0   -0.15    1.83
   0   3   0    6.10    5.62
   0  -3   0   -0.39    2.72
   0   3  -1   27.25    2.98
   0   3   1   24.92    3.04
   0   3   1   28.59    2.19
   0   3   1   22.31    5.74
   0   3  -1   30.24    4.43
   0   3   1   25.03    5.31
   0   3  -1   31.72    7.99
   0  -3   1   31.71    3.04
   0  -3   1   25.34    4.84
   0  -3  -1   26.26    2.54
   0   3  -2  184.42   12.07
   0   3  -2  174.94   10.05
   0   3   2  178.47   10.36
   0   3   2  165.18   13.82
   0   3   2  174.61   13.13
   0   3   2  176.18   12.21
   0   3  -2  171.15   12.13
   0   3  -2  172.71   15.46
   0  -3   2  174.88   10.05
   0  -3   2  168.09   12.68
   0  -3  -2  204.52   13.38
   0   3  -3 1935.27  100.10
   0   3  -3 1948.88  100.42
   0   3   3 1974.88  101.87
   0   3  -3 1984.60   97.26
   0   3   3 1835.20  100.15
   0   3  -3 2053.58  103.20
   0  -3  -3 2040.57  100.75
   0  -3   3 2127.95   99.92
   0  -3  -3 2032.20   96.18
   0  -3   3 2025.19   97.55
   0   3   4  436.42   27.49
   0   3   4  448.64   29.36
   0   3  -4  482.31   24.97
   0   3  -4  414.98   28.37
   0   3  -4  451.33   28.51
   0   3  -4  444.75   31.19
   0  -3  -4  538.28   24.16
   0  -3   4  432.28   27.48
   0  -3  -4  477.95   29.30
   0  -3  -4  439.00   25.36
   0  -3   4  474.39   25.37
   0   3   5   47.85    7.09
   0   3   5   44.67    8.47
   0   3  -5   37.37    8.09
   0   3  -5   47.37    8.05
   0   3  -5   48.85   11.38
   0   3  -5   47.33    4.41
   0  -3  -5   55.71    3.71
   0  -3  -5   49.86    5.72
   0  -3   5   56.16    5.14
   0  -3  -5   66.13    9.50
   0  -3   5   50.18    7.16
   0   3  -6  690.95   42.63
   0   3  -6  751.20   45.77
   0   3  -6  761.98   43.67
   0   3   6  729.99   41.26
   0   3   6  745.14   44.29
   0   3  -6  726.43   37.59
   0  -3  -6  773.93   36.85
   0  -3   6  737.38   41.75
   0  -3  -6  750.52   43.31
   0  -3  -6  689.20   39.29
   0  -3   6  740.58   38.04
   0   3  -7  312.94   17.00
   0   3  -7  285.40   22.13
   0   3   7  301.74   20.99
   0   3   7  313.52   24.20
   0  -3   7  296.34   17.47
   0  -3  -7  310.01   23.05
   0  -3  -7  306.80   16.07
   0  -3  -7  256.40   18.66
   0  -3   7  285.95   21.04
   0   3  -8  184.75   12.02
   0   3  -8  166.84   17.36
   0   3   8  172.91   12.39
   0   3   8  181.51   16.09
   0   3   8  208.10   20.24
   0  -3  -8  203.44   11.27
   0  -3   8  179.48   16.15
   0  -3  -8  176.41   14.51
   0  -3  -8  192.84   18.51
   0  -3   8  196.80   12.56
   0   3   9  348.73   21.53
   0   3  -9  352.14   27.62
   0   3   9  404.46   31.13
   0   3   9  378.20   26.13
   0  -3  -9  347.79   23.95
   0  -3   9  367.55   21.42
   0  -3  -9  393.06   20.28
   0  -3   9  381.70   26.27
   0   3  10   74.65   12.26
   0   3  10   68.75    7.46
   0   3  10   56.84   13.76
   0  -3 -10   73.61   10.49
   0  -3  10   47.35   10.20
   0  -3  10   66.86    7.49
   0   3  11  140.47   19.04
   0   3  11  102.59    9.79
   0  -3  11  126.17   15.50
   0  -3 -11  130.07   13.83
   0  -3  11  119.65   10.15
   0   3 -12   23.41   12.34
   0   3  12   36.87    6.48
   0  -3  12   27.86    9.59
   0  -3 -12   29.23    9.68
   0  -3  12   49.56    7.32
   0  -3  13   27.61    6.70
   0   4   0  588.36   35.95
   0   4   0  637.45   32.86
   0   4   0  626.43   32.54
   0  -4   0  651.82   32.60
   0  -4   0  675.17   33.21
   0   4  -1   44.37    9.05
   0   4   1   48.52    3.44
   0   4   1   52.81    7.75
   0   4  -1   49.27    4.25
   0   4   1   50.39    8.05
   0   4  -1   38.71    5.48
   0   4   1   46.93    4.41
   0  -4  -1   44.13    3.97
   0  -4   1   52.39    6.25
   0  -4   1   45.65    4.09
   0   4   2  634.33   38.66
   0   4  -2  644.01   39.10
   0   4  -2  674.23   35.52
   0   4   2  642.84   33.46
   0   4   2  642.84   37.14
   0   4  -2  652.57   33.19
   0   4   2  617.46   36.01
   0   4  -2  635.42   35.61
   0  -4   2  680.71   33.29
   0   4  -3 1642.25   82.99
   0   4  -3 1590.55   82.45
   0   4  -3 1564.48   79.30
   0   4  -3 1548.37   85.63
   0   4   3 1542.51   84.68
   0   4   3 1703.31   80.06
   0   4   3 1589.17   83.60
   0   4   3 1617.57   82.61
   0  -4  -3 1802.26   83.73
   0  -4   3 1645.12   79.60
   0   4   4   40.15    4.71
   0   4  -4   40.63    3.91
   0   4   4   40.87    8.09
   0   4  -4   51.33    8.06
   0   4  -4   31.52    7.21
   0   4  -4   21.29   10.36
   0   4   4   41.23    7.09
   0  -4  -4   31.08    2.33
   0  -4  -4   55.16    9.08
   0  -4   4   35.52    4.06
   0   4  -5  946.39   56.70
   0   4   5  901.80   51.61
   0   4  -5  964.17   53.64
   0   4  -5  902.29   52.91
   0   4  -5  909.11   48.20
   0   4   5  923.51   54.34
   0  -4   5 1028.84   52.30
   0  -4   5  968.06   48.83
   0  -4  -5  940.14   53.38
   0  -4  -5  991.73   46.92
   0   4  -6  515.20   32.36
   0   4  -6  485.22   26.44
   0   4   6  528.78   33.81
   0   4   6  478.22   30.22
   0  -4   6  511.26   30.63
   0  -4  -6  466.45   27.21
   0  -4  -6  516.74   25.23
   0  -4   6  517.50   27.22
   0  -4  -6  499.89   32.73
   0   4   7 1888.30  102.66
   0   4  -7 1932.50   98.44
   0   4   7 1870.05  106.45
   0   4  -7 1918.78  105.12
   0  -4  -7 1883.48  105.41
   0  -4   7 1887.84   99.10
   0  -4   7 1945.05  103.37
   0  -4  -7 1808.40   99.72
   0  -4  -7 2278.11   97.68
   0   4  -8   41.52   10.73
   0   4   8   58.36    9.76
   0   4   8   46.31   12.01
   0  -4   8   46.19    6.83
   0  -4  -8   47.59    7.37
   0  -4   8   46.72    9.10
   0  -4  -8   70.84    5.47
   0  -4  -8   47.87   12.47
   0   4   9 1257.02   70.86
   0   4   9 1133.42   59.89
   0   4  -9 1118.82   66.73
   0   4   9 1099.41   63.72
   0  -4   9 1239.23   65.18
   0  -4   9 1219.37   59.79
   0  -4  -9 1080.26   61.30
   0   4  10   25.03   13.96
   0   4 -10    5.60   10.27
   0   4  10   14.22    4.98
   0  -4  10   12.03    5.79
   0  -4 -10    7.50    6.60
   0  -4  10   12.85    8.85
   0   4 -11    3.05   10.70
   0   4  11    1.10    4.35
   0   4  11   15.14   13.40
   0  -4  11   -2.32    8.49
   0  -4  11    3.55    5.74
   0   4  12  142.09   12.16
   0  -4  12  138.68   12.40
   0  -4  12  168.16   18.01
   0   5   0    4.49    7.63
   0   5   0   -1.14    2.88
   0   5   0   -1.02    2.95
   0  -5   0    3.70    2.41
   0   5  -1 2127.06   99.61
   0   5  -1 1906.89   97.86
   0   5   1 2114.28  103.34
   0   5   1 1999.72  102.43
   0   5  -1 1922.22  103.07
   0   5   1 2002.39   96.86
   0   5   1 2033.88   98.14
   0  -5   1 2050.21   98.01
   0  -5  -1 1966.21   98.16
   0   5  -2    2.70    2.81
   0   5  -2    2.70    4.69
   0   5   2    6.90    5.91
   0   5   2    2.38    5.95
   0   5   2    2.27    2.66
   0   5   2   -1.06    6.83
   0   5  -2    1.04    4.79
   0   5  -2   -7.50   10.15
   0  -5   2    2.62    2.20
   0   5   3  288.21   22.27
   0   5  -3  313.29   17.80
   0   5   3  296.10   21.46
   0   5   3  329.22   18.46
   0   5  -3  325.57   21.43
   0   5  -3  268.62   24.34
   0   5  -3  313.32   21.06
   0   5   3  332.60   24.07
   0  -5   3  338.80   18.17
   0   5  -4   54.73    5.16
   0   5  -4   51.23    8.71
   0   5   4   44.32    8.43
   0   5   4   54.37   10.08
   0  -5  -4   55.44    9.06
   0  -5   4   56.84    5.35
   0   5   5  839.67   48.35
   0   5  -5  809.84   46.36
   0   5  -5  810.46   40.72
   0   5   5  817.15   44.85
   0  -5   5  871.75   41.30
   0  -5  -5  766.94   39.20
   0  -5   5  700.31   48.85
   0  -5  -5  818.04   46.12
   0   5  -6   89.59    7.06
   0   5  -6  101.51   12.39
   0   5   6  106.51   11.24
   0   5   6   98.11   13.39
   0  -5   6   81.09   16.15
   0  -5  -6  105.23   13.25
   0  -5   6   87.57    7.53
   0  -5  -6   83.83    5.24
   0   5  -7 1657.43   75.76
   0   5   7 1576.74   72.05
   0   5   7 1699.74   78.13
   0  -5  -7 1713.22   64.65
   0  -5   7 1649.84   81.85
   0  -5  -7 1752.04   76.17
   0  -5   7 1711.97   67.88
   0   5  -8  332.59   26.77
   0   5   8  385.07   29.26
   0   5   8  305.33   23.65
   0  -5  -8  348.24   20.57
   0  -5   8  352.95   33.17
   0  -5   8  341.73   20.40
   0   5  -9   10.95    9.60
   0   5   9   26.58   11.93
   0  -5   9   31.45    6.30
   0  -5   9   -2.06   18.76
   0   5 -10    7.46   10.27
   0   5  10    9.28   12.54
   0   5  10   -3.34    5.09
   0  -5  10    9.01   19.42
   0  -5  10   12.92    5.95
   0   5 -11  200.45   23.39
   0   5  11  204.31   15.86
   0   5  11  243.89   27.45
   0  -5  11  251.21   16.76
   0  -5  11  240.84   33.30
   0   6   0 1207.40   61.72
   0   6   0 1269.94   62.01
   0  -6   0 1240.62   61.97
   0  -6   0 1205.85   65.92
   0   6  -1   -1.57    5.22
   0   6   1   12.65    8.13
   0   6  -1   -0.45    4.03
   0   6  -1    0.59    3.20
   0   6   1    0.97    2.76
   0   6   1   -0.82    1.96
   0  -6  -1    0.69    2.61
   0  -6   1    2.51    2.53
   0  -6   1    3.47    5.62
   0  -6  -1   -5.27    5.78
   0   6  -2  769.34   40.23
   0   6   2  817.12   44.11
   0   6  -2  729.61   40.20
   0   6  -2  702.40   37.22
   0   6   2  675.52   45.10
   0  -6   2  706.99   37.38
   0  -6   2  736.39   43.77
   0   6   3  182.07   17.44
   0   6  -3  173.01   12.14
   0   6   3  168.27   18.39
   0   6  -3  185.90   15.60
   0  -6   3  180.95   17.91
   0  -6   3  212.01   12.52
   0   6  -4  146.37   14.21
   0   6   4  138.20   15.11
   0   6   4  144.08   16.47
   0   6  -4  133.26   10.15
   0  -6   4  163.20   10.66
   0  -6   4  167.35   17.28
   0   6  -5 1126.50   58.64
   0   6   5 1065.52   63.17
   0   6   5 1169.60   67.28
   0   6  -5 1227.70   65.19
   0  -6   5 1168.84   68.59
   0  -6   5 1219.71   59.43
   0   6   6   19.40    7.84
   0   6   6   27.45   10.71
   0   6  -6   22.86    9.41
   0  -6   6   26.20   13.10
   0  -6   6   28.66    4.76
   0  -6  -6   22.78    9.99
   0   6  -7  117.25   15.09
   0   6   7  102.11   15.74
   0  -6   7  104.38   19.57
   0  -6   7  122.56    9.67
   0   6  -8   -2.66    9.77
   0   6   8   12.40   11.08
   0   6   8   16.84    5.67
   0  -6   8    6.66    4.55
   0  -6   8    1.89   15.60
   0   6   9  124.56   19.47
   0   6  -9  152.91   18.78
   0  -6   9  156.57   25.98
   0   6 -10  269.30   26.47
   0   6  10  227.07   26.48
   0  -6  10  308.25   34.07
   0  -6  10  245.02   16.95
   0   7   0    1.22    8.69
   0  -7   0    4.59    6.14
   0  -7   0    0.39    3.15
   0   7  -1  633.55   34.15
   0   7   1  663.12   40.32
   0  -7   1  609.03   38.24
   0  -7  -1  591.53   37.02
   0  -7   1  607.11   32.85
   0   7   2   25.66   11.20
   0   7   2   34.38    9.87
   0   7  -2   23.11    6.68
   0  -7   2   24.34    8.81
   0  -7   2   17.96    4.05
   0   7   3  131.44   17.48
   0   7   3  163.12   17.71
   0   7  -3  181.18   15.03
   0  -7   3  168.03   11.49
   0  -7   3  187.90   18.58
   0   7   4  341.91   27.14
   0   7   4  319.50   28.27
   0   7  -4  360.82   25.33
   0  -7   4  338.02   28.51
   0  -7   4  376.24   21.15
   0   7   5   87.29   14.40
   0   7   5   84.18   12.93
   0   7  -5  102.22   12.94
   0  -7   5   76.86   16.04
   0  -7   5   99.08    8.28
   0   7  -6 1474.36   81.61
   0   7   6 1353.31   83.75
   0  -7   6 1470.15   86.09
   0  -7   6 1520.09   75.14
   0   7  -7  171.20   18.37
   0   7   7  158.46   19.92
   0  -7   7  144.44   22.04
   0  -7   7  164.02   12.06
   0   7  -8    2.80   11.09
   0   7   8    8.48   11.57
   0  -7   8   -0.48    4.35
   0  -7   8   -3.97   15.26
   0   7   9   25.33    6.36
   0   7   9   43.73   14.88
   0   7  -9   28.84   12.08
   0  -7   9   56.28   19.79
   0  -7   9   22.74    5.84
   0   8   0    9.87   10.58
   0  -8   0    5.42    3.68
   0  -8   0    1.05    7.11
   0   8   1   14.99   11.51
   0  -8  -1   20.72    8.50
   0  -8   1   22.53    4.81
   0  -8   1   25.50    9.20
   0   8   2  452.37   37.18
   0   8   2  501.90   35.37
   0  -8   2  488.51   34.17
   0  -8   2  484.01   27.13
   0   8   3  179.28   20.28
   0   8   3  142.94   20.32
   0  -8   3  178.39   12.60
   0  -8   3  179.31   19.46
   0   8   4  375.94   30.67
   0   8  -4  339.12   24.60
   0  -8   4  326.70   19.98
   0  -8   4  336.53   28.77
   0   8   5   24.34   11.44
   0   8  -5   19.11    9.76
   0  -8   5   26.81    5.31
   0  -8   5   17.58   12.52
   0   8  -6  116.21   15.77
   0   8   6  114.32   17.76
   0  -8   6   96.66   18.59
   0  -8   6  111.37    9.58
   0   8  -7   74.35   14.40
   0   8   7   56.38   15.31
   0  -8   7   53.14    7.05
   0  -8   7   54.81   17.63
   0   8  -8  342.66   29.07
   0   8   8  304.47   30.97
   0  -8   8  341.98   21.16
   0  -8   8  308.14   33.06
   0   8  -9   22.07   13.12
   0   9   0   -3.23   10.71
   0  -9   0   -2.40    8.43
   0   9  -1  103.62   17.50
   0   9   1   85.29   19.15
   0   9   1  103.80   17.54
   0  -9   1   74.89   13.63
   0  -9   1   96.67    9.25
   0   9   2   58.51   16.16
   0  -9   2   54.31   12.79
   0  -9   2   80.78    8.07
   0   9   3   46.15   16.07
   0  -9   3   82.52    8.17
   0  -9   3   84.24   15.58
   0   9   4   10.93   12.24
   0  -9   4   27.22    5.33
   0  -9   4   17.54   12.22
   0  -9   5  161.54   21.03
   0  -9   5  150.37   11.56
   0   9   6  249.58   27.75
   0  -9   6  288.03   18.60
   0   9   7   50.68   16.47
   0  -9   7   82.24   19.60
   0 -10   0  210.03   20.85
   0  10   1   13.62   14.40
   0 -10   1   -5.56   10.18
   0  10   2  210.93   27.43
   0  10  -2  283.88   30.43
   0 -10   2  251.09   17.17
   0 -10   2  235.43   23.79
   0  10   3  -12.34   14.16
   0 -10   3    1.55   10.69
   0 -10   3   -0.56    4.80
   0  10   4  457.91   39.33
   0 -10   4  473.12   27.80
   0 -10   4  478.62   37.65
   0 -10   5    3.32    4.62
   0 -11   3   22.45    6.28
  -1   0  13   -2.34    9.83
   1   0 -13   -7.12   11.43
  -1   0  13    2.89    5.08
  -1   0  12 1211.10   80.07
  -1   0  12 1148.34   69.34
   1   0 -12 1220.15   71.59
  -1   0  12 1307.70   65.16
   1   0 -11    2.37    8.09
  -1   0  11    1.92    4.04
  -1   0  11   -6.22   13.86
  -1   0  11   -2.03    6.80
  -1   0  10  259.31   27.12
  -1   0  10  245.04   20.64
   1   0 -10  267.09   22.08
  -1   0  10  272.76   16.85
  -1   0   9   -1.60   10.73
  -1   0   9   -1.71    6.25
  -1   0   9   -2.65    3.35
   1   0  -9    1.90    7.03
   1   0  -8 2310.01  109.32
  -1   0   8 2111.76  103.08
  -1   0   8 2052.31  106.84
   1   0  -8 1995.83  107.38
  -1   0   8 2132.47  112.55
  -1   0   7   -3.44    7.89
  -1   0   7    1.34    4.69
   1   0  -7   -2.93    5.31
   1   0  -7    1.55    3.32
   1   0  -7    2.38    6.67
   1   0  -7    2.04    7.95
  -1   0   7   -0.29    2.06
  -1   0   6  653.02   38.41
   1   0  -6  645.98   38.88
   1   0  -6  733.92   36.13
   1   0  -6  747.59   40.03
  -1   0   6  607.77   40.62
   1   0  -6  817.87   42.60
  -1   0   6  713.85   35.84
  -1   0   5   -3.36    5.13
   1   0  -5    3.76    6.10
  -1   0   5    4.80    4.09
   1   0  -5    1.56    4.23
   1   0  -5   -0.22    2.44
   1   0  -5    8.81    7.42
   1   0  -4   15.78    2.58
   1   0  -4   23.59    7.28
  -1   0   4   17.17    5.55
  -1   0   4   13.23    4.30
   1   0  -4    9.64    5.00
  -1   0   4    4.57    4.60
   1   0  -3   -0.13    1.92
   1   0  -3    1.76    5.41
  -1   0   3    0.90    1.54
  -1   0   3    4.38    4.00
  -1   0   3   -1.10    3.31
  -1   0   3   -0.33    4.47
   1   0  -2 1502.15   72.21
   1   0  -2 1301.68   71.30
  -1   0   2 1414.77   71.05
   1   0  -2 1559.30   70.31
  -1   0   2 1487.94   71.51
  -1   0   2 1531.41   70.31
  -1   0   2 1209.38   71.44
   1   0  -1    0.90    1.18
   1   0  -1   -0.15    0.66
   1   0  -1   -0.35    1.10
  -1   0   1   -0.80    1.61
  -1   0   1    0.41    0.65
   1   0  -1    0.15    0.71
  -1   0   1    0.97    0.95
  -1   0   1    1.79    2.22
  -1   0  -1    1.04    1.98
   1   0   1   -0.31    1.42
  -1   0  -1    0.31    0.58
   1   0   1    0.42    0.57
   1   0   1    0.48    2.19
  -1   0  -1    4.05    2.35
   1   0   234563.50 1571.11
  -1   0  -232791.50 1568.75
   1   0   231859.20 1568.79
   1   0   232984.40 1570.63
  -1   0  -237568.30 1571.24
  -1   0  -232346.00 1570.64
   1   0   3   -0.38    3.94
  -1   0  -3   -1.34    5.22
  -1   0  -3    4.19    4.72
   1   0   3   -1.73    4.44
   1   0   4  881.81   49.53
   1   0   4  967.66   49.32
   1   0   4  914.34   46.07
   1   0   5   -1.26    2.52
  -1   0  -5   10.40    6.77
  -1   0  -5    0.20    1.94
   1   0   5    0.18    1.58
  -1   0  -5   -8.77    6.33
  -1   0  -5   -1.70    4.68
   1   0   5    2.40    4.32
  -1   0  -6 1080.77   59.53
   1   0   6 1093.48   59.66
   1   0   6 1132.91   55.45
  -1   0  -6 1183.89   55.61
  -1   0  -6 1231.20   60.86
  -1   0  -6 1250.59   62.26
  -1   0  -7    2.35    5.74
  -1   0  -7   -6.08    7.88
  -1   0  -7   -1.00    7.64
   1   0   7   -0.53    2.38
   1   0   7   -0.80    5.70
   1   0   7   -0.97    6.16
  -1   0  -7   -2.19    2.64
  -1   0  -8 1567.99   85.31
   1   0   8 1655.79   80.19
   1   0   8 1590.35   88.90
   1   0   8 1560.80   85.24
   1   0   9    0.35    2.95
   1   0   9   -5.87    7.46
   1   0   9    7.80   10.94
  -1   0  -9   -0.98    7.08
  -1   0 -10    6.52    8.41
   1   0  10   -1.06    8.19
   1   0  10    2.36    3.13
   1   0  10   -7.28   14.30
   1   0  11    9.21    8.98
   1   0  11    1.32    3.71
  -1   0 -11    7.18    8.91
   1   0  11    2.06   14.75
   1   0  12   20.77   18.71
   1   0  12   36.58   11.21
   1   0  12   28.73    5.80
  -1   0 -12   31.38   10.95
  -1   0 -13   10.02   10.75
   1   0  13   -9.08   11.38
   1   0  13    0.54    4.27
   1   0  14    4.14    5.28
   1  -1 -14  140.75   17.90
  -1  -1  14  135.74   12.82
  -1   1  13   28.68    6.44
   1   1 -13   33.29   13.10
  -1  -1  13   38.11   11.11
  -1  -1  13   18.77    5.80
   1  -1 -13   35.54   11.69
  -1   1  12   16.90    5.07
  -1   1  12   44.30   18.05
  -1   1  12   18.06    9.85
   1   1 -12   20.73   11.59
  -1  -1  12   19.62    5.70
  -1  -1  12   48.94   10.60
  -1  -1  12    7.05   15.91
   1  -1 -12   13.34    9.58
  -1   1  11    8.99    8.04
  -1   1  11   10.93    4.36
   1   1 -11   13.95    9.62
  -1   1  11   15.47   12.82
  -1  -1  11   23.35   15.95
  -1  -1  11   19.77    4.65
  -1  -1  11    1.05    8.12
   1  -1 -11    8.83    7.91
   1   1 -10   11.48    8.36
  -1   1  10    9.55    4.06
  -1   1  10   15.71   10.52
  -1   1  10   19.38    7.53
  -1  -1  10    8.67    7.53
  -1  -1  10    1.91   13.14
   1  -1 -10   10.88    7.56
  -1  -1  10   12.05    4.28
  -1   1   9  370.42   30.85
   1   1  -9  476.50   30.91
  -1   1   9  452.70   25.28
  -1   1   9  423.39   28.80
  -1  -1   9  436.32   36.16
  -1  -1   9  457.55   29.60
   1  -1  -9  430.87   29.35
  -1  -1   9  473.32   25.41
  -1   1   8 1740.25   99.75
  -1   1   8 1883.29   96.61
   1   1  -8 1888.25  101.61
   1  -1  -8 1838.77  100.18
   1  -1  -8 2109.31   96.44
  -1  -1   8 1878.49   96.57
  -1  -1   8 1943.00  107.30
   1  -1  -8 2141.06  102.56
  -1  -1   8 1845.08  100.37
  -1   1   7  307.88   25.42
   1   1  -7  347.83   24.86
  -1   1   7  342.44   23.79
   1   1  -7  392.84   21.09
  -1   1   7  389.93   21.14
   1   1  -7  414.80   26.41
   1  -1  -7  414.46   25.59
   1  -1  -7  356.87   23.91
  -1  -1   7  394.22   21.17
  -1  -1   7  410.38   30.06
  -1  -1   7  393.09   24.61
   1   1  -6  233.37   17.38
   1   1  -6  205.02   17.96
  -1   1   6  196.06   15.37
   1   1  -6  226.38   12.88
  -1   1   6  197.43   17.36
   1  -1  -6  202.21   15.36
  -1  -1   6  246.06   20.61
  -1  -1   6  211.13   15.58
   1  -1  -6  274.71   17.33
  -1  -1   6  226.05   12.95
   1   1  -5  513.04   29.89
   1   1  -5  515.24   26.01
   1   1  -5  431.95   29.60
  -1   1   5  454.23   28.12
  -1   1   5  498.91   31.09
  -1  -1   5  462.08   28.37
  -1  -1   5  540.28   26.18
   1  -1  -5  543.25   29.22
   1  -1  -5  487.30   28.21
  -1  -1   5  507.43   32.33
  -1   1   4   31.68    3.21
   1   1  -4   24.26    6.44
   1   1  -4   30.78    3.14
  -1   1   4   29.41    4.86
  -1   1   4   33.22    7.00
   1   1  -4   32.38    5.51
  -1  -1   4   23.89    7.30
  -1  -1   4   28.04    4.94
   1  -1  -4   21.35    4.31
  -1  -1   4   28.94    7.00
   1  -1  -4   25.63    5.52
   1   1  -3 1603.25   81.52
  -1   1   3 1703.90   82.40
  -1   1   3 1602.99   80.47
   1   1  -3 1671.31   83.19
   1   1  -3 1657.31   79.17
  -1   1   3 1605.38   80.43
  -1   1   3 1680.88   79.43
   1  -1  -3 1537.18   80.25
   1  -1  -3 1818.06   80.86
  -1  -1   3 1601.15   80.90
  -1  -1   3 1599.50   81.72
  -1  -1   3 1539.64   83.47
   1   1  -2 1982.77   94.00
  -1   1   2 1883.69   91.48
  -1   1   2 1953.83   91.07
   1   1  -2 1916.27   92.73
   1   1  -2 1919.20   92.22
   1   1  -2 1909.05   90.91
  -1   1   2 2055.80   93.08
  -1   1   2 1948.30   91.47
   1  -1  -2 1779.09   91.29
  -1  -1   2 1736.87   90.93
   1  -1  -2 1951.75   91.62
  -1  -1   2 1831.96   92.66
  -1  -1   2 1930.24   92.02
  -1  -1   2 2002.65   94.28
   1   1  -1 1242.20   60.59
  -1   1   1 1298.44   61.78
   1   1  -1 1318.18   62.63
   1   1  -1 1213.84   61.60
  -1  -1   1 1246.50   61.71
  -1  -1   1 1251.03   60.67
  -1  -1   1 1349.81   62.70
   1   1   0  529.50   27.25
   1   1   0  542.94   26.48
  -1   1   0  553.77   26.79
   1   1   0  605.43   27.99
   1   1   0  536.64   26.19
  -1   1   0  520.33   25.94
  -1   1   0  542.99   26.33
  -1  -1   0  536.96   26.22
  -1  -1   0  542.38   27.14
   1   1   1 1402.94   68.99
   1   1   1 1394.53   69.13
  -1   1  -1 1444.49   68.97
  -1   1  -1 1385.03   66.87
  -1   1  -1 1406.72   67.13
   1   1   1 1424.00   67.28
   1   1   1 1396.08   66.89
  -1   1  -1 1358.35   68.30
  -1  -1  -1 1406.79   67.28
   1  -1   1 1409.85   68.25
  -1  -1  -1 1405.79   69.24
  -1  -1  -1 1382.28   69.18
  -1   1  -2  515.69   24.23
  -1   1  -2  502.45   27.25
  -1   1  -2  527.85   26.52
   1   1   2  467.52   23.79
   1   1   2  475.49   26.25
   1   1   2  489.36   26.04
  -1   1  -2  502.22   23.77
  -1  -1  -2  516.71   26.69
   1  -1   2  485.91   26.04
   1  -1   2  469.02   23.76
   1   1   3    6.07    4.43
  -1   1  -3   -0.42    5.09
  -1   1  -3    1.52    1.49
   1   1   3   11.00    5.00
  -1   1  -3   -0.39    4.52
   1  -1   3    5.12    3.78
  -1  -1  -3    2.92    1.38
   1  -1   3    2.41    1.17
  -1  -1  -3    2.21    5.29
   1   1   4  947.32   47.41
  -1   1  -4  799.55   45.56
  -1   1  -4  861.92   42.24
   1   1   4  812.64   45.33
  -1   1  -4  849.73   42.66
  -1   1  -4  849.36   46.08
  -1   1  -4  808.48   45.84
  -1  -1  -4  921.32   46.15
  -1  -1  -4  936.99   46.83
  -1  -1  -4  865.36   42.24
   1  -1   4  879.55   42.29
   1  -1   4  794.00   45.31
  -1   1  -5   44.60    4.00
  -1   1  -5   29.16    7.10
   1   1   5   49.95    6.94
   1   1   5   43.75    4.09
  -1   1  -5   38.11    8.43
   1   1   5   51.76    8.69
   1  -1   5   37.63    6.68
  -1  -1  -5   51.30    8.21
  -1  -1  -5   47.61    3.94
   1  -1   5   46.92    3.88
  -1  -1  -5   59.34    8.78
  -1   1  -6 3499.69  157.03
   1   1   6 3100.03  149.38
  -1   1  -6 3258.51  149.33
   1   1   6 2977.39  155.81
   1   1   6 2872.92  153.03
  -1  -1  -6 3049.63  148.98
   1  -1   6 2834.66  153.10
  -1  -1  -6 2834.95  152.38
  -1  -1  -6 3374.09  154.77
  -1  -1  -6 3334.75  155.70
   1  -1   6 3105.83  149.10
   1   1   7   50.18    9.97
  -1   1  -7   51.81    5.21
   1   1   7   45.35    8.30
  -1   1  -7   52.86    5.05
   1   1   7   50.25    4.86
  -1   1  -7   54.50   10.08
   1  -1   7   39.86    7.96
   1  -1   7   48.10    4.68
  -1  -1  -7   47.31    4.56
  -1  -1  -7   46.81    8.02
  -1  -1  -7   44.54    9.77
   1   1   8  571.26   31.28
  -1   1  -8  631.70   31.63
   1   1   8  495.31   36.80
   1   1   8  566.60   36.17
  -1   1  -8  582.50   36.58
   1  -1   8  597.65   31.26
  -1  -1  -8  540.41   35.18
  -1  -1  -8  648.97   31.33
   1  -1   8  589.08   36.37
   1   1   9   -8.14    8.38
   1   1   9    8.96    7.94
   1   1   9    6.23    3.15
  -1   1  -9    3.15    6.89
   1  -1   9    1.97    6.85
  -1  -1  -9    7.35    7.01
   1  -1   9    5.94    3.25
  -1   1 -10  429.20   30.93
   1   1  10  371.00   31.98
   1   1  10  443.22   24.80
   1   1  10  409.39   30.10
  -1  -1 -10  393.93   29.27
   1  -1  10  401.11   29.94
   1  -1  10  464.83   24.83
   1   1  11    5.70    8.83
   1   1  11    9.22   12.58
   1   1  11    2.73    3.66
  -1   1 -11    3.81    8.74
   1  -1  11    0.44    3.46
  -1  -1 -11   -5.60    9.53
   1  -1  11    4.60    8.49
   1   1  12  275.54   24.05
  -1   1 -12  263.87   24.70
   1   1  12  295.36   31.34
   1   1  12  274.86   17.88
  -1  -1 -12  249.28   23.13
   1  -1  12  288.94   17.97
   1  -1  12  268.28   23.65
   1   1  13   24.41   12.00
   1   1  13   31.29    6.16
  -1   1 -13   30.38   13.56
  -1  -1 -13   17.54   10.63
   1  -1  13   38.16    6.57
   1  -1  13   30.35   10.92
   1  -1  14   45.48    7.28
  -1  -2  14   50.16    8.34
  -1   2  13  105.80   10.47
  -1  -2  13   93.99   14.65
   1  -2 -13  136.07   16.32
  -1  -2  13   99.74   10.44
   1   2 -12  333.86   29.55
  -1   2  12  347.25   22.25
  -1   2  12  342.57   32.69
  -1  -2  12  380.66   27.84
  -1  -2  12  381.25   22.72
  -1  -2  12  332.44   37.19
   1  -2 -12  350.98   26.92
  -1   2  11  209.71   23.76
   1   2 -11  286.12   24.68
  -1   2  11  275.47   17.93
  -1   2  11  265.52   21.97
  -1  -2  11  271.08   18.03
   1  -2 -11  316.83   23.16
  -1  -2  11  310.46   23.28
  -1  -2  11  301.56   33.13
   1   2 -10  409.59   32.14
  -1   2  10  362.01   29.44
  -1   2  10  426.67   26.47
   1  -2 -10  413.90   30.09
  -1  -2  10  389.66   30.20
  -1  -2  10  478.80   39.96
  -1  -2  10  453.13   26.68
  -1   2   9   -3.90    8.61
  -1   2   9    4.03    3.58
  -1   2   9   -0.84    6.29
  -1  -2   9    6.36    6.26
  -1  -2   9    0.80    3.23
   1  -2  -9    4.02    6.27
  -1  -2   9   -1.78   12.36
  -1   2   8   20.92    9.17
  -1   2   8   13.68    6.81
  -1   2   8   23.46    4.14
  -1  -2   8   28.37   12.44
  -1  -2   8   21.19    6.87
   1  -2  -8   30.48    9.03
  -1  -2   8   25.96    4.19
   1  -2  -8   18.06    6.34
   1  -2  -8   30.72    3.84
  -1   2   7  636.62   37.86
   1   2  -7  562.04   29.49
   1   2  -7  497.53   33.87
  -1   2   7  515.00   32.61
  -1  -2   7  546.79   29.85
  -1  -2   7  608.03   39.59
   1  -2  -7  530.24   32.02
   1  -2  -7  611.32   34.32
   1  -2  -7  604.80   29.07
  -1  -2   7  532.30   33.17
  -1   2   6  251.37   18.41
   1   2  -6  213.60   19.72
  -1   2   6  311.97   22.35
   1   2  -6  286.30   16.00
   1   2  -6  270.90   20.12
   1   2  -6  273.29   20.81
   1  -2  -6  293.08   15.48
  -1  -2   6  265.83   18.98
   1  -2  -6  326.91   20.16
   1  -2  -6  282.70   18.16
  -1  -2   6  303.41   16.44
  -1  -2   6  268.25   23.65
   1   2  -5 1770.75   93.19
  -1   2   5 1671.91   89.21
  -1   2   5 1721.49   87.47
   1   2  -5 1739.97   86.91
   1   2  -5 1628.87   90.93
  -1   2   5 1911.82   93.04
   1  -2  -5 1780.04   89.99
  -1  -2   5 1890.02   87.35
  -1  -2   5 1802.55   91.57
  -1  -2   5 1795.21   95.07
   1  -2  -5 1890.90   86.47
  -1  -2   5 1756.75   90.01
   1  -2  -5 1691.54   88.51
  -1   2   4 4544.70  221.80
   1   2  -4 4442.41  223.01
   1   2  -4 4538.94  223.57
   1   2  -4 4528.50  220.05
  -1   2   4 4782.17  224.51
  -1   2   4 4415.75  220.44
   1   2  -4 4522.40  225.92
  -1  -2   4 4815.18  220.39
   1  -2  -4 4809.99  222.65
   1  -2  -4 4455.63  220.97
  -1  -2   4 4987.56  226.98
  -1  -2   4 4754.99  224.10
  -1  -2   4 4532.24  222.52
  -1   2   3    6.54    3.39
   1   2  -3    4.90    1.98
   1   2  -3   10.85    4.74
   1   2  -3    7.71    4.32
  -1   2   3    4.37    4.24
   1   2  -3   11.58    7.56
  -1  -2   3    6.90    3.57
   1  -2  -3    3.00    2.20
  -1  -2   3   -4.03    6.96
   1  -2  -3    0.36    4.69
  -1  -2   3    2.53    2.22
  -1  -2   3    3.15    5.08
   1   2  -2   98.23    6.24
   1   2  -2   94.57    8.29
   1   2  -2  106.33    7.92
  -1   2   2  101.19    8.45
   1   2  -2  109.96   11.30
  -1   2   2  100.02    7.22
   1  -2  -2   99.55    7.81
  -1  -2   2   89.60    9.96
   1   2  -1 3869.51  184.45
   1   2  -1 3765.64  185.82
  -1   2   1 3871.62  183.12
   1   2  -1 3778.07  183.13
  -1   2   1 3745.64  185.65
  -1   2   1 3666.35  184.19
  -1   2   1 4041.25  184.29
  -1  -2   1 3859.30  185.74
  -1   2   0 1391.16   65.76
   1   2   0 1347.35   65.84
  -1   2   0 1367.44   64.80
  -1   2   0 1322.13   66.97
   1   2   0 1302.61   67.33
  -1   2   0 1351.98   65.22
   1   2   0 1324.42   65.49
  -1  -2   0 1414.05   67.36
  -1  -2   0 1339.63   65.87
  -1  -2   0 1343.94   65.51
  -1   2  -1  233.14   11.91
  -1   2  -1  245.48   13.61
  -1   2  -1  239.55   13.72
   1   2   1  236.04   13.85
   1   2   1  239.90   15.19
   1   2   1  232.41   11.69
   1   2   1  229.40   15.46
  -1   2  -1  248.81   15.67
   1   2   1  231.56   12.36
   1  -2   1  231.53   11.89
  -1  -2  -1  229.83   12.33
  -1  -2  -1  227.65   12.05
  -1   2  -2  960.39   48.27
  -1   2  -2  983.69   50.09
   1   2   2  927.67   46.35
  -1   2  -2 1001.28   48.62
   1   2   2  934.93   49.10
   1   2   2  904.18   49.40
  -1   2  -2  938.33   45.80
   1   2   2  934.24   45.40
  -1  -2  -2  983.21   45.49
  -1  -2  -2  899.99   49.86
   1  -2   2  949.79   45.87
   1  -2   2  816.61   47.56
   1   2   3  205.05   14.24
  -1   2  -3  188.66   10.35
  -1   2  -3  183.76   13.66
  -1   2  -3  194.58   15.70
   1   2   3  168.20   12.89
   1   2   3  184.14    9.99
  -1   2  -3  196.60   13.83
   1  -2   3  198.81   10.48
  -1  -2  -3  208.78   10.09
  -1  -2  -3  209.72   15.14
   1  -2   3  182.45   12.96
  -1  -2  -3  186.67   14.44
  -1   2  -4   36.39    3.26
  -1   2  -4   36.59    9.23
  -1   2  -4   27.98    6.70
   1   2   4   41.24    6.27
   1   2   4   45.14    7.08
  -1   2  -4   41.65    7.02
  -1  -2  -4   38.86    7.81
  -1  -2  -4   42.88    3.08
   1  -2   4   35.77    3.40
  -1  -2  -4   43.39    8.17
   1  -2   4   30.90    5.73
   1   2   5   90.43   10.66
  -1   2  -5   89.69   10.84
   1   2   5   83.11    9.48
  -1   2  -5  102.24    6.39
  -1   2  -5   93.53   10.05
  -1   2  -5   74.02   10.11
  -1  -2  -5   96.81    6.02
  -1  -2  -5   91.90   11.13
   1  -2   5   67.75    8.85
  -1  -2  -5   96.30   10.98
   1  -2   5   99.96    6.44
  -1   2  -6  392.05   29.33
  -1   2  -6  492.25   25.30
   1   2   6  434.89   28.75
   1   2   6  486.99   31.29
  -1   2  -6  478.80   24.61
   1   2   6  447.93   25.12
  -1   2  -6  422.49   29.04
  -1  -2  -6  509.65   31.56
  -1  -2  -6  532.83   30.34
   1  -2   6  467.19   28.75
  -1  -2  -6  488.06   24.27
  -1  -2  -6  403.45   27.01
   1  -2   6  471.28   24.66
   1   2   7 1948.54   99.93
  -1   2  -7 2084.26   99.45
   1   2   7 2148.75  108.35
  -1   2  -7 1905.89  104.91
   1   2   7 1967.20  104.08
  -1  -2  -7 2170.87   99.14
  -1  -2  -7 1971.92  102.97
  -1  -2  -7 2040.86  105.41
   1  -2   7 2049.61   99.50
   1  -2   7 1836.58  103.82
   1   2   8  211.88   17.45
   1   2   8  223.73   20.42
   1   2   8  186.20   12.81
  -1   2  -8  218.56   12.99
  -1  -2  -8  197.74   16.11
   1  -2   8  195.77   17.12
   1  -2   8  207.79   12.77
  -1  -2  -8  210.42   12.31
   1   2   9   80.66   11.83
   1   2   9   76.79   13.50
   1   2   9   76.56    7.08
  -1  -2  -9   71.63   10.53
   1  -2   9   87.43   11.84
   1  -2   9   72.68    6.80
   1   2  10   14.41   10.66
   1   2  10   13.80    4.09
  -1   2 -10   13.55    9.63
   1   2  10    6.52    8.86
  -1  -2 -10    6.58    7.31
   1  -2  10   14.80    4.04
   1  -2  10   15.23    8.26
   1   2  11   38.33   11.28
  -1   2 -11   37.64   11.44
   1   2  11   38.42   10.95
   1   2  11   53.53    6.68
   1  -2  11   49.80    6.36
   1  -2  11   23.67    9.08
  -1  -2 -11   39.46    9.92
   1   2  12  118.17   16.27
   1   2  12   92.38   17.76
  -1   2 -12   91.47   16.47
   1   2  12  109.12    9.83
   1  -2  12  100.22   15.08
  -1  -2 -12   86.15   13.57
   1  -2  12  113.69    9.90
   1   2  13   87.91    9.37
   1  -2  13   98.74    9.78
  -1  -2 -13   75.72   14.03
  -1  -3  13   19.06    6.46
   1   3 -12   72.28   15.47
  -1   3  12   59.10    7.75
  -1   3  12   34.59   12.57
   1  -3 -12   65.01   11.25
  -1  -3  12   47.24   11.19
  -1  -3  12   64.84   22.17
  -1  -3  12   57.63    7.82
  -1   3  11   83.32    8.86
  -1   3  11   93.02   16.13
   1  -3 -11   71.90   11.37
  -1  -3  11   96.43    9.51
  -1  -3  11  100.24   21.66
  -1  -3  11  111.86   13.87
  -1   3  10   32.99   12.13
  -1   3  10   26.80    8.82
  -1   3  10   12.38    4.78
  -1  -3  10   33.06   16.16
  -1  -3  10   32.07    5.62
   1  -3 -10   20.60    7.48
  -1  -3  10   37.02    9.44
  -1   3   9  528.04   33.98
   1   3  -9  562.40   37.05
  -1   3   9  508.10   30.16
  -1   3   9  548.15   39.34
   1  -3  -9  587.38   28.98
   1  -3  -9  563.92   33.19
  -1  -3   9  566.71   30.50
  -1  -3   9  558.48   42.72
  -1  -3   9  520.76   34.20
  -1   3   8   56.46   12.48
   1   3  -8   46.30    9.88
  -1   3   8   31.80    8.01
  -1  -3   8   46.39    8.78
   1  -3  -8   58.18   10.73
  -1  -3   8   44.79    5.91
  -1  -3   8   53.22   15.50
   1  -3  -8   42.09    7.27
   1  -3  -8   54.82    4.74
  -1   3   7   64.18   11.04
   1   3  -7   56.80   10.07
  -1   3   7   64.51    8.69
   1   3  -7   60.10    5.68
   1  -3  -7   86.03   11.52
  -1  -3   7   54.44   14.15
  -1  -3   7   55.44    5.99
   1  -3  -7   48.95    7.13
  -1  -3   7   48.44    7.95
   1  -3  -7   71.38    5.00
  -1   3   6    1.67    2.57
   1   3  -6    3.19    2.33
   1   3  -6    2.27    9.05
   1   3  -6   11.05    6.28
  -1   3   6   -0.58    4.63
  -1   3   6    4.85    6.42
   1  -3  -6    0.15    1.59
  -1  -3   6    1.79    2.85
  -1  -3   6   -1.28   10.31
   1  -3  -6    7.83    3.90
  -1  -3   6   -3.94    5.05
   1  -3  -6    6.70    6.89
   1  -3  -6    2.98    7.97
  -1   3   5   18.74    4.96
   1   3  -5   21.50    9.92
  -1   3   5   21.74    3.48
   1   3  -5   19.24    6.45
   1   3  -5   12.85    6.14
  -1   3   5   24.75    6.82
   1   3  -5   21.85    3.13
  -1  -3   5   22.02   10.30
   1  -3  -5   20.68    3.80
  -1  -3   5    9.01    4.65
  -1  -3   5   15.21    3.67
   1  -3  -5   22.93    7.13
   1  -3  -5   21.89    2.18
   1   3  -4  756.26   44.10
  -1   3   4  754.77   42.14
   1   3  -4  710.68   41.26
  -1   3   4  707.81   39.43
   1   3  -4  715.50   37.50
   1   3  -4  671.43   40.55
   1  -3  -4  762.89   36.27
   1  -3  -4  741.65   40.87
  -1  -3   4  705.25   44.79
  -1  -3   4  778.92   38.03
   1   3  -3  764.26   40.05
   1   3  -3  728.95   40.63
   1   3  -3  757.69   37.45
  -1   3   3  768.33   41.57
  -1   3   3  738.78   39.28
   1   3  -3  740.42   43.25
  -1  -3   3  827.61   43.75
  -1  -3   3  777.67   37.75
  -1  -3   3  738.97   40.51
   1  -3  -3  741.64   35.91
   1  -3  -3  805.69   40.14
  -1   3   2  699.49   34.74
   1   3  -2  683.88   34.56
  -1   3   2  690.15   38.20
   1   3  -2  726.05   37.10
  -1   3   2  697.46   36.55
   1   3  -2  739.82   39.83
  -1   3   2  663.09   36.56
   1   3  -2  710.64   36.33
  -1  -3   2  701.62   38.94
  -1  -3   2  662.05   34.61
  -1  -3   2  722.39   36.91
  -1   3   1  360.75   19.07
   1   3  -1  370.29   20.55
   1   3  -1  369.43   23.01
   1   3  -1  367.58   19.16
  -1   3   1  359.80   21.19
  -1   3   1  422.17   21.66
  -1  -3   1  338.54   20.73
  -1  -3   1  376.06   22.56
   1   3   0 1125.75   55.27
  -1   3   0 1144.15   55.09
  -1   3   0 1146.67   53.86
   1   3   0 1005.78   57.50
  -1   3   0 1148.98   57.40
  -1   3   0 1098.03   54.56
   1   3   0 1118.74   54.86
   1  -3   0 1086.94   54.60
  -1  -3   0 1121.61   55.49
  -1  -3   0 1082.09   57.30
  -1   3  -1  707.99   38.41
  -1   3  -1  659.99   34.65
   1   3   1  702.38   35.12
   1   3   1  645.45   38.55
  -1   3  -1  691.41   36.37
   1   3   1  697.67   34.28
  -1   3  -1  764.73   36.48
   1   3   1  681.82   37.30
  -1  -3  -1  709.69   34.79
  -1  -3  -1  709.96   35.13
  -1  -3  -1  696.84   37.05
   1  -3   1  728.93   34.69
   1   3   2  799.07   41.82
   1   3   2  790.22   43.51
   1   3   2  812.99   39.74
  -1   3  -2  763.84   41.50
   1   3   2  777.19   43.91
  -1   3  -2  783.32   39.13
  -1   3  -2  782.46   41.70
  -1   3  -2  845.73   44.38
   1   3   2  798.20   38.26
  -1  -3  -2  869.64   43.38
   1  -3   2  818.01   39.19
  -1  -3  -2  764.70   38.80
  -1   3  -3 1540.91   77.17
   1   3   3 1503.48   75.17
  -1   3  -3 1395.52   74.47
   1   3   3 1381.89   75.75
   1   3   3 1421.21   70.11
  -1   3  -3 1506.45   70.90
   1   3   3 1471.33   71.73
  -1   3  -3 1456.11   74.36
  -1  -3  -3 1460.31   77.20
  -1  -3  -3 1550.91   75.68
   1  -3   3 1435.65   71.06
  -1  -3  -3 1501.27   70.27
  -1   3  -4 1755.01   92.53
  -1   3  -4 1849.70   95.39
   1   3   4 1749.30   91.99
  -1   3  -4 1780.95   92.80
  -1   3  -4 1862.01   88.30
   1   3   4 1803.93   93.78
   1  -3   4 1842.76   88.59
  -1  -3  -4 1924.35   94.15
   1  -3   4 1795.96   91.81
  -1  -3  -4 1705.04   94.52
  -1  -3  -4 1824.31   87.65
  -1   3  -5  454.05   31.29
   1   3   5  434.68   27.63
  -1   3  -5  413.96   28.15
  -1   3  -5  459.62   29.07
  -1   3  -5  453.51   23.73
   1   3   5  448.80   29.45
  -1  -3  -5  492.61   23.34
  -1  -3  -5  448.51   30.57
   1  -3   5  451.49   24.12
  -1  -3  -5  451.64   29.83
   1  -3   5  426.82   27.50
   1   3   6   91.83   11.85
  -1   3  -6   83.98   11.02
  -1   3  -6   83.48   12.80
  -1   3  -6   91.90    6.32
   1   3   6   88.64    9.90
  -1  -3  -6  101.98    6.29
   1  -3   6   80.70   10.00
   1  -3   6   75.28    6.48
  -1  -3  -6   77.10   11.51
  -1  -3  -6   78.46    8.26
  -1   3  -7  490.79   33.55
   1   3   7  592.61   36.62
   1   3   7  514.53   28.70
   1   3   7  514.33   32.55
  -1   3  -7  543.54   27.76
  -1  -3  -7  579.78   27.44
   1  -3   7  526.21   32.70
   1  -3   7  510.97   28.07
  -1  -3  -7  450.55   30.01
  -1  -3  -7  578.42   35.52
   1   3   8  522.39   28.78
   1   3   8  509.14   32.89
  -1   3  -8  532.19   27.90
   1   3   8  522.09   36.86
  -1   3  -8  511.02   34.22
  -1  -3  -8  564.12   27.39
   1  -3   8  456.30   32.51
   1  -3   8  516.90   28.15
  -1  -3  -8  491.46   30.85
   1  -3   8  475.92   38.43
   1   3   9  217.34   22.61
  -1   3  -9  227.60   20.31
   1   3   9  199.73   13.94
   1   3   9  213.07   18.69
  -1  -3  -9  194.84   16.38
   1  -3   9  244.00   26.67
   1  -3   9  193.63   18.48
  -1  -3  -9  232.57   12.93
   1  -3   9  199.47   13.52
   1   3  10   52.57   11.43
   1   3  10   73.76   14.80
   1   3  10   64.61    7.18
   1  -3  10   69.41    7.20
   1  -3  10   86.41   19.92
   1  -3  10   73.69   11.87
  -1  -3 -10   71.52   10.36
   1   3  11  112.66   10.28
   1   3  11  128.47   17.72
   1   3  11  131.33   16.19
   1  -3  11  123.53   10.14
  -1  -3 -11  113.53   13.63
   1  -3  11  132.51   15.51
   1  -3  11  131.77   25.44
   1   3  12   47.15   11.10
   1   3  12   26.18    5.51
  -1   3 -12   20.38   13.48
  -1  -3 -12   33.00    9.99
   1  -3  12   22.02    5.77
   1  -3  12   11.48    9.80
   1  -3  12   19.88   20.52
  -1  -4  13   17.08    8.20
  -1   4  12    3.61   13.13
  -1   4  12    1.77    4.91
  -1  -4  12   13.18    9.75
  -1  -4  12    4.08    6.39
  -1   4  11   16.73    5.34
   1   4 -11   13.84   11.65
  -1   4  11    9.17   12.16
  -1  -4  11   11.83    6.22
  -1  -4  11    5.59    8.08
  -1   4  10   32.01   13.60
   1   4 -10   19.64   11.46
  -1   4  10   20.19    5.08
   1  -4 -10   17.93    6.99
  -1  -4  10   22.75    8.47
  -1  -4  10   21.14    6.16
   1   4  -9  440.08   32.14
  -1   4   9  432.14   34.41
  -1  -4   9  438.34   25.62
   1  -4  -9  440.75   27.05
  -1  -4   9  462.14   29.86
   1   4  -8  348.79   27.64
  -1   4   8  340.04   24.68
  -1   4   8  406.70   30.38
   1  -4  -8  333.86   27.49
  -1  -4   8  314.40   32.26
  -1  -4   8  391.47   26.01
  -1  -4   8  356.62   22.27
   1  -4  -8  417.82   20.20
   1  -4  -8  346.69   22.89
   1   4  -7  616.50   34.36
  -1   4   7  639.71   37.97
   1   4  -7  617.31   40.80
  -1   4   7  644.13   35.46
  -1   4   7  642.35   42.16
  -1  -4   7  640.53   35.31
   1  -4  -7  634.90   35.58
   1  -4  -7  711.88   33.23
  -1  -4   7  602.51   45.26
  -1  -4   7  716.55   39.26
   1  -4  -7  690.99   41.14
   1   4  -6 1938.61  103.01
  -1   4   6 1753.41   99.57
   1   4  -6 1800.14   96.89
  -1   4   6 1804.47   97.80
  -1   4   6 1867.61  103.80
   1  -4  -6 1811.21   97.27
   1  -4  -6 1862.18  102.01
  -1  -4   6 1896.96  107.10
  -1  -4   6 1809.95   97.64
   1   4  -5 3150.18  162.12
   1   4  -5 3189.81  166.21
  -1   4   5 3192.68  163.76
   1   4  -5 3066.65  157.57
   1   4  -5 3223.86  163.02
  -1   4   5 3307.98  160.58
   1  -4  -5 3190.40  161.82
  -1  -4   5 3250.05  158.28
   1  -4  -5 3212.50  165.50
  -1  -4   5 3265.01  166.98
   1  -4  -5 3334.48  155.93
  -1   4   4  177.34   15.31
  -1   4   4  173.61   13.21
   1   4  -4  199.60   18.54
   1   4  -4  184.86   14.42
   1   4  -4  168.31   14.28
   1   4  -4  167.08   10.81
  -1  -4   4  153.91   17.04
   1  -4  -4  195.60   14.37
   1  -4  -4  180.69   17.63
  -1  -4   4  189.52   11.30
  -1  -4   4  197.31   15.33
  -1   4   3  404.02   24.32
   1   4  -3  383.44   27.99
  -1   4   3  395.58   24.41
  -1   4   3  402.75   21.89
   1   4  -3  401.61   21.56
  -1   4   3  440.08   26.73
   1   4  -3  428.11   24.46
   1   4  -3  415.86   24.98
  -1  -4   3  421.20   25.34
   1  -4  -3  461.25   24.94
  -1  -4   3  382.11   27.14
  -1  -4   3  391.87   21.61
  -1   4   2  793.30   46.52
  -1   4   2  857.87   46.49
   1   4  -2  922.58   45.95
  -1   4   2  881.18   49.04
   1   4  -2  889.26   49.78
   1   4  -2  859.79   43.84
  -1   4   2  883.42   43.96
   1   4  -2  864.65   46.30
  -1  -4   2  922.01   49.09
  -1  -4   2  893.63   44.02
  -1  -4   2  868.72   46.42
   1   4  -1  122.14    9.38
  -1   4   1  120.38    6.26
  -1   4   1  142.74   11.36
   1   4  -1  129.19   12.95
  -1   4   1  126.35    6.96
  -1   4   1  130.81   11.41
  -1   4   1  120.15    7.84
   1   4  -1  129.35    8.11
   1  -4  -1  122.39    9.97
  -1  -4   1  138.99    8.17
  -1  -4   1  158.56   12.49
  -1  -4   1  130.21    9.64
   1   4   0  961.46   48.03
  -1   4   0  946.97   51.46
  -1   4   0 1013.78   48.38
   1   4   0  969.37   51.84
   1   4   0  990.18   48.44
  -1   4   0  954.73   47.73
   1  -4   0  976.06   47.82
  -1  -4   0  988.50   48.67
   1  -4   0  872.33   50.19
  -1  -4   0  887.31   50.82
   1   4   1  148.33   12.24
  -1   4  -1  141.56   10.25
   1   4   1  128.30   13.06
   1   4   1  143.64    9.04
  -1   4  -1  151.00   10.51
  -1   4  -1  135.43    8.49
  -1   4  -1  142.61   13.53
   1   4   1  136.60    8.09
  -1  -4  -1  130.89   11.08
   1  -4   1  143.41    8.54
   1  -4   1  126.54   11.72
  -1  -4  -1  161.99    9.03
  -1   4  -2  796.25   40.79
   1   4   2  724.23   43.76
   1   4   2  768.07   38.42
  -1   4  -2  735.68   37.69
   1   4   2  743.86   41.03
   1   4   2  729.95   42.69
  -1   4  -2  781.56   40.65
   1   4   2  744.77   36.45
  -1   4  -2  790.77   44.18
   1  -4   2  794.34   37.89
   1  -4   2  768.71   42.55
  -1  -4  -2  766.18   37.36
   1   4   3   70.94    8.06
   1   4   3   60.44    9.68
  -1   4  -3   65.09    8.33
  -1   4  -3   67.95    8.34
   1   4   3   64.23    3.73
  -1   4  -3   64.73   12.40
   1   4   3   60.12    9.26
   1   4   3   74.20    6.01
  -1   4  -3   70.66    5.38
   1  -4   3   63.89    5.07
   1  -4   3   92.51   11.13
  -1  -4  -3   70.63    4.47
  -1  -4  -3   90.06   10.53
  -1   4  -4    5.60    5.42
   1   4   4    5.44    6.53
   1   4   4    3.98    3.19
  -1   4  -4    7.02    9.39
  -1   4  -4    6.91    6.31
   1   4   4   -0.71    5.41
  -1   4  -4    1.55    2.14
   1  -4   4    8.97    8.74
   1  -4   4    2.68    2.28
  -1  -4  -4   -0.78    6.58
  -1  -4  -4    4.43    1.48
   1   4   5  104.25   11.05
   1   4   5  113.32    8.74
  -1   4  -5  108.65   11.99
  -1   4  -5  110.26   15.61
  -1   4  -5  102.04   11.61
  -1   4  -5  112.43    7.43
   1   4   5  109.38   12.65
  -1  -4  -5   73.97   13.82
  -1  -4  -5  113.54   13.06
  -1  -4  -5  116.11    6.54
   1  -4   5  107.39    7.86
   1  -4   5  124.61   16.11
  -1   4  -6 1199.36   67.49
  -1   4  -6 1209.46   61.32
   1   4   6 1274.43   66.69
   1   4   6 1172.32   68.65
  -1  -4  -6 1177.26   62.94
   1  -4   6 1237.04   61.95
   1  -4   6 1272.93   72.13
   1  -4   6 1276.86   66.31
  -1  -4  -6 1278.98   60.48
  -1  -4  -6 1274.97   69.03
  -1   4  -7  727.95   45.65
  -1   4  -7  768.88   39.31
   1   4   7  702.60   43.85
   1   4   7  762.05   47.67
   1  -4   7  750.19   39.89
  -1  -4  -7  810.26   38.45
  -1  -4  -7  782.20   47.99
   1  -4   7  799.82   44.81
   1  -4   7  802.84   51.25
  -1  -4  -7  714.09   41.22
   1   4   8  306.92   26.05
  -1   4  -8  280.70   23.88
   1   4   8  284.27   22.11
   1   4   8  278.72   18.16
   1  -4   8  269.52   21.85
   1  -4   8  291.95   17.76
  -1  -4  -8  332.33   16.42
  -1  -4  -8  254.09   19.16
   1  -4   8  296.29   29.05
   1   4   9 1256.13   66.07
  -1   4  -9 1290.52   73.33
   1   4   9 1335.35   76.43
   1   4   9 1189.55   70.36
   1  -4   9 1342.03   79.88
  -1  -4  -9 1214.08   67.58
   1  -4   9 1316.75   71.21
   1  -4   9 1363.51   65.59
   1   4  10   -0.51    4.22
   1   4  10    7.23   12.80
  -1   4 -10    4.19    9.62
   1   4  10   -2.18    8.80
   1  -4  10   -5.61    8.49
  -1  -4 -10    6.91    6.62
   1  -4  10    2.62    5.26
   1  -4  10    6.35   16.99
   1   4  11  284.81   28.33
   1   4  11  227.84   15.88
  -1   4 -11  191.09   22.54
   1  -4  11  218.61   30.70
   1  -4  11  216.64   15.60
   1  -4  11  247.02   21.29
   1   4  12   79.63    8.91
  -1  -5  12    7.98    7.58
   1   5 -11  139.00   18.83
  -1   5  11  135.83   11.88
  -1   5  11  103.89   19.91
  -1  -5  11  149.84   13.11
   1   5 -10   65.38   14.88
  -1   5  10   87.95   17.95
  -1  -5  10   87.59    9.82
   1   5  -9  156.01   17.85
  -1   5   9  154.41   19.65
  -1  -5   9  137.09   11.85
  -1   5   8   48.69   12.47
  -1   5   8   51.33    6.62
   1   5  -8   48.78   11.69
   1  -5  -8   35.55    5.20
  -1  -5   8   49.67    6.93
   1  -5  -8   44.47   12.04
   1   5  -7    7.92    8.52
  -1   5   7    3.52    6.38
  -1   5   7   11.88    3.98
  -1   5   7   11.54    8.68
   1  -5  -7   13.36    8.96
  -1  -5   7   16.38    4.81
   1   5  -6   92.88   12.12
  -1   5   6   68.49   12.19
   1   5  -6   85.73    6.95
  -1   5   6   74.93    9.26
  -1  -5   6   89.15    7.72
   1  -5  -6   92.67   11.75
   1  -5  -6   80.53    5.58
  -1   5   5  348.50   25.38
  -1   5   5  339.35   22.21
   1   5  -5  334.31   19.33
   1   5  -5  363.99   24.89
  -1  -5   5  350.96   19.96
   1  -5  -5  387.19   24.06
  -1   5   4  692.08   39.40
  -1   5   4  665.26   41.47
   1   5  -4  693.08   35.40
   1   5  -4  678.84   40.02
  -1   5   4  615.29   38.40
  -1  -5   4  711.08   35.92
   1   5  -3  249.93   14.44
  -1   5   3  240.28   14.70
  -1   5   3  234.05   19.51
   1   5  -3  244.89   17.65
   1   5  -3  236.58   21.51
   1   5  -3  237.25   17.09
  -1   5   3  230.57   18.09
  -1   5   3  244.94   17.80
  -1  -5   3  250.71   14.65
  -1  -5   3  254.16   18.01
  -1   5   2  263.20   19.60
   1   5  -2  262.06   16.05
  -1   5   2  253.76   19.43
  -1   5   2  279.84   16.03
  -1   5   2  242.55   21.13
   1   5  -2  301.48   18.32
   1   5  -2  273.27   22.71
   1   5  -2  272.98   18.13
  -1  -5   2  300.25   16.28
  -1  -5   2  291.29   18.76
   1   5  -1 2673.42  124.95
  -1   5   1 2628.59  123.34
  -1   5   1 2503.61  121.22
  -1   5   1 2538.11  122.01
  -1   5   1 2757.63  128.13
  -1   5   1 2535.62  127.54
   1   5  -1 2404.35  123.26
   1   5  -1 2479.11  128.66
  -1  -5   1 2614.03  123.55
  -1  -5   1 2604.64  125.12
   1  -5  -1 2629.32  126.66
  -1   5   0  169.52   15.19
   1   5   0  179.84   15.67
   1   5   0  159.02   10.65
   1   5   0  156.99   10.94
  -1   5   0  174.72    9.16
  -1   5   0  161.77   10.34
   1   5   0  216.47   17.12
  -1   5   0  180.09   11.06
  -1  -5   0  166.18   11.43
   1  -5   0  168.46   10.51
  -1  -5   0  178.71   10.88
   1  -5   0  159.33   13.39
   1   5   1 4330.87  216.52
   1   5   1 4476.10  212.14
  -1   5  -1 4460.76  217.35
   1   5   1 4556.65  218.12
  -1   5  -1 4716.03  213.71
  -1   5  -1 4419.31  211.59
  -1   5  -1 4509.95  213.79
   1   5   1 4299.20  210.93
   1  -5   1 4449.92  216.42
   1  -5   1 4328.52  211.75
  -1  -5  -1 4315.75  211.67
   1   5   2    0.29    3.01
   1   5   2    1.11    7.19
  -1   5  -2    3.88    5.09
  -1   5  -2    1.87   10.13
  -1   5  -2   -0.69    2.48
   1   5   2    7.81    6.19
   1   5   2   -1.78    5.95
   1   5   2    0.62    0.70
  -1   5  -2   -0.54    4.64
  -1  -5  -2   -0.17    1.95
   1  -5   2    0.47    2.07
   1  -5   2   -2.47    5.79
  -1   5  -3   50.82   11.98
  -1   5  -3   38.28    7.41
   1   5   3   29.72    1.92
   1   5   3   28.73    7.01
   1   5   3   43.00    9.34
  -1   5  -3   35.16    4.42
   1   5   3   33.66    8.45
  -1   5  -3   40.49    6.87
   1   5   3   38.24    4.66
   1  -5   3   33.60    8.90
   1  -5   3   36.42    3.95
  -1  -5  -3   27.71    2.79
   1   5   4 1759.33   95.86
   1   5   4 1824.27   94.33
  -1   5  -4 1839.12   97.28
  -1   5  -4 1803.38   88.28
  -1   5  -4 1836.93   93.31
   1  -5   4 1842.74   88.64
  -1  -5  -4 1774.29   87.20
   1  -5   4 1837.38   96.58
  -1  -5  -4 2022.61   95.09
  -1   5  -5  597.52   31.31
   1   5   5  595.43   38.91
  -1   5  -5  672.57   37.64
   1   5   5  585.29   36.18
   1  -5   5  607.16   40.49
  -1  -5  -5  604.54   30.27
  -1  -5  -5  594.51   37.61
   1  -5   5  620.56   31.81
  -1   5  -6  173.79   15.79
   1   5   6  137.86   15.88
  -1   5  -6  148.82    9.51
   1   5   6  138.45   14.09
   1  -5   6  137.22    9.81
   1  -5   6  135.03   19.13
  -1  -5  -6  149.74   16.43
  -1  -5  -6  142.66    8.34
  -1   5  -7   23.41    8.81
   1   5   7   34.82   10.42
   1   5   7   13.51    7.29
   1  -5   7   14.83   15.15
  -1  -5  -7   23.08    2.95
  -1  -5  -7   19.69    4.70
   1  -5   7   16.36    4.27
   1  -5   7   18.48    7.03
  -1   5  -8  494.76   33.54
   1   5   8  481.19   35.34
   1   5   8  462.91   30.80
   1  -5   8  462.48   26.05
   1  -5   8  475.70   30.98
  -1  -5  -8  455.58   26.82
   1  -5   8  511.07   39.94
   1   5   9  242.47   24.15
  -1   5  -9  232.99   21.76
   1   5   9  203.94   15.00
   1  -5   9  215.70   14.51
   1  -5   9  195.03   18.57
   1  -5   9  218.54   28.66
  -1   5 -10   11.94   10.11
   1   5  10   31.98   13.53
   1   5  10   26.87    5.98
   1  -5  10   43.90    7.12
   1  -5  10   41.09   10.37
   1  -5  10   33.50   18.96
   1   5  11  168.48   13.36
  -1   5 -11  131.39   19.65
   1   5  11  155.93   22.75
   1  -5  11  168.48   18.22
   1  -5  11  194.37   29.75
  -1  -6  11  169.26   14.06
  -1   6  10   -3.84   14.06
   1   6 -10   -7.80   12.25
  -1  -6  10    6.63    5.94
  -1  -6  10   30.13   20.45
  -1   6   9  252.19   25.78
  -1   6   9  260.79   17.75
   1   6  -9  275.70   24.82
  -1  -6   9  253.54   17.22
  -1   6   8   -3.04   10.38
  -1   6   8   -0.54    4.28
   1   6  -8    9.25   10.16
  -1  -6   8    2.87    4.50
  -1   6   7   11.14    9.23
   1   6  -7   -3.61    9.38
   1  -6  -7    1.95    8.99
  -1  -6   7    6.66    4.19
   1   6  -6  131.64   14.96
  -1   6   6  121.72   16.00
  -1  -6   6  120.71    9.73
   1  -6  -6  137.70   14.84
  -1   6   5   21.53    7.38
  -1   6   5   14.47    9.12
   1   6  -5   27.76    8.47
  -1  -6   5   23.25    4.67
  -1   6   4  449.06   31.57
  -1   6   4  536.74   35.68
   1   6  -4  488.53   27.72
   1   6  -4  557.17   32.88
  -1  -6   4  546.86   28.58
   1   6  -3  704.02   40.78
   1   6  -3  674.60   37.17
  -1   6   3  708.57   42.43
  -1   6   3  687.86   44.12
  -1  -6   3  758.99   37.76
  -1   6   2 2039.76  105.35
  -1   6   2 1947.46  107.88
   1   6  -2 2103.14  102.85
   1   6  -2 1955.55   99.99
  -1  -6   2 2043.96  103.16
  -1  -6   2 2098.51  100.43
  -1   6   1   25.26    8.89
  -1   6   1   22.50    2.65
  -1   6   1   21.05    3.80
  -1   6   1   20.69    1.64
   1   6  -1   21.79    5.31
  -1   6   1   23.33    7.94
   1   6  -1   22.21    4.20
   1  -6  -1   26.84    6.55
  -1  -6   1   22.47    5.79
  -1  -6   1   25.23    3.88
  -1   6   0  743.46   45.33
  -1   6   0  773.29   39.86
   1   6   0  897.44   48.36
  -1   6   0  775.78   38.06
  -1   6   0  832.54   40.19
   1   6   0  793.84   40.16
   1   6   0  788.24   40.25
  -1  -6   0  772.53   40.84
   1  -6   0  738.75   39.91
  -1  -6   0  747.59   40.10
   1  -6   0  789.36   44.10
  -1   6  -1  153.58   11.74
   1   6   1  112.10   14.04
  -1   6  -1  139.13    8.11
  -1   6  -1  131.80    9.19
  -1   6  -1  147.36   11.13
  -1   6  -1  125.88   15.55
   1   6   1  143.32    8.41
   1  -6   1  126.42    9.13
   1  -6   1  133.83   13.36
  -1  -6  -1  128.38    9.57
  -1  -6  -1  144.50    9.59
   1   6   2  285.84   14.53
   1   6   2  289.11   25.02
  -1   6  -2  300.02   16.73
  -1   6  -2  335.65   20.18
  -1   6  -2  319.00   20.20
   1   6   2  304.40   23.49
   1  -6   2  345.40   23.56
   1  -6   2  321.63   16.95
  -1  -6  -2  288.44   15.79
  -1   6  -3 1999.46   99.87
  -1   6  -3 2185.55  104.63
   1   6   3 1994.76  107.81
   1   6   3 1926.04  108.43
   1  -6   3 2038.59  107.28
   1  -6   3 2070.70  100.18
  -1   6  -4  443.05   24.07
   1   6   4  436.25   30.66
   1   6   4  438.10   32.13
  -1   6  -4  451.58   29.22
   1  -6   4  450.61   24.45
   1  -6   4  470.43   32.08
  -1   6  -5  258.58   21.09
   1   6   5  272.90   21.35
   1   6   5  263.92   22.94
  -1  -6  -5  270.36   22.25
   1  -6   5  277.83   25.07
   1  -6   5  258.28   15.62
   1   6   6   21.49    8.21
  -1   6  -6   39.12   10.06
   1   6   6    9.44    9.30
   1  -6   6   32.27    4.77
   1  -6   6   34.78   13.86
  -1  -6  -6   27.07    3.06
  -1   6  -7  107.38   14.87
   1   6   7   77.93   12.45
   1   6   7  101.43   15.54
   1  -6   7  104.75   19.34
   1  -6   7   99.64    8.36
  -1   6  -8    6.65    9.55
   1   6   8   15.95   10.92
   1  -6   8   35.59   17.11
   1  -6   8   20.92    4.73
  -1   6  -9  116.68   17.11
   1   6   9  125.82   19.01
   1  -6   9   89.51   23.40
   1  -6   9  110.46    9.57
   1   6  10  108.04   19.64
   1   6  10  112.21   10.96
  -1   6 -10  128.19   18.24
   1  -6  10  139.87   26.51
  -1  -7  10   23.06    6.61
   1   7  -9    3.00   10.90
  -1   7   9   -1.26    5.42
  -1   7   9    8.97   12.81
  -1  -7   9  -17.56   18.45
  -1  -7   9    6.52    5.11
   1   7  -8  172.27   19.47
  -1   7   8  147.70   12.65
  -1   7   8  147.71   20.43
  -1  -7   8  150.01   12.01
  -1  -7   8  199.65   25.98
  -1   7   7    9.12   10.66
   1   7  -7   -3.78   10.38
  -1  -7   7    1.45    4.03
  -1  -7   7    1.82   12.91
  -1   7   6   41.38   12.73
   1   7  -6   58.98   12.16
  -1  -7   6   76.79    7.87
  -1  -7   6   67.40   16.12
  -1   7   5  333.19   27.03
   1   7  -5  311.19   24.08
  -1  -7   5  354.44   29.05
  -1  -7   5  313.01   19.31
  -1   7   4  127.20   16.84
  -1   7   4  123.71   15.19
   1   7  -4  148.30   15.05
  -1  -7   4  149.88   18.22
  -1  -7   4  154.55   11.07
  -1   7   3  356.59   31.33
   1   7  -3  481.18   28.65
  -1   7   3  442.07   30.94
  -1  -7   3  445.17   24.97
  -1  -7   3  431.37   32.41
  -1   7   2  618.59   40.23
  -1   7   2  584.33   42.48
   1   7  -2  700.21   37.26
  -1  -7   2  601.94   40.42
  -1  -7   2  650.32   34.59
  -1   7   1  863.52   47.63
   1   7  -1  833.43   42.19
  -1  -7   1  751.08   46.00
   1  -7  -1  725.94   44.56
  -1  -7   1  757.56   40.73
  -1   7   0  504.62   27.91
  -1   7   0  502.12   33.25
   1  -7   0  427.37   25.58
  -1  -7   0  436.43   30.09
  -1  -7   0  493.82   26.28
   1  -7   0  457.05   30.18
  -1   7  -1  490.81   26.99
   1   7   1  481.24   33.30
  -1  -7  -1  413.29   29.44
   1  -7   1  463.33   30.50
   1  -7   1  452.99   25.44
  -1  -7  -1  475.46   26.09
   1   7   2   -1.56    9.79
  -1   7  -2    3.82    6.02
   1   7   2    1.24    8.96
   1  -7   2    1.07    7.39
   1  -7   2    4.18    3.15
   1   7   3  532.11   40.49
  -1   7  -3  626.72   36.22
   1   7   3  543.24   39.49
   1  -7   3  599.22   31.99
   1  -7   3  672.09   40.64
   1   7   4   19.51   10.25
   1   7   4   23.36   10.12
  -1   7  -4   26.46    8.22
   1  -7   4   24.48    4.38
   1  -7   4   27.63   11.26
  -1   7  -5  209.55   18.73
   1   7   5  167.57   20.51
   1   7   5  156.75   18.13
   1  -7   5  205.07   21.57
   1  -7   5  210.40   13.27
  -1   7  -6   32.64   11.13
   1   7   6   28.88   10.96
   1  -7   6   33.11    5.11
   1  -7   6   23.93   13.91
   1   7   7  151.25   20.57
  -1   7  -7  187.15   20.07
   1  -7   7  194.99   24.26
   1  -7   7  201.54   13.41
  -1   7  -8  161.51   19.55
   1   7   8  138.56   20.61
   1  -7   8  145.09   24.23
   1  -7   8  182.60   12.66
   1   7   9   14.84   12.41
  -1   7  -9    9.27   11.04
   1  -7   9   -2.13   17.60
   1   8  -9   51.43   14.58
   1   8  -8   64.69   14.83
  -1   8   8   82.65   17.17
  -1   8   8   82.53    9.77
  -1  -8   8   80.92   20.66
  -1  -8   8   82.41    9.14
   1   8  -7    5.22   10.83
  -1   8   7    1.67   10.37
  -1  -8   7    7.69   14.66
  -1  -8   7    1.59    4.51
   1   8  -6   13.05    8.69
  -1   8   6   -1.61   11.88
  -1  -8   6   -3.03    4.78
  -1  -8   6    3.56   13.48
   1   8  -5   41.30   10.39
  -1   8   5   64.25   14.42
  -1  -8   5   36.64    5.98
  -1  -8   5   32.68   12.98
   1   8  -4  114.56   13.69
  -1   8   4   93.45   16.07
  -1  -8   4  109.86   17.45
  -1  -8   4  113.92    9.80
  -1   8   3   45.68   13.30
  -1  -8   3   49.84    6.60
  -1  -8   3   65.08   13.45
  -1   8   2 1934.68  101.75
  -1   8   2 1624.32  103.21
  -1  -8   2 1887.03   94.26
  -1  -8   2 2012.03  102.26
  -1   8   1   27.92   10.95
   1   8  -1   42.40   12.76
  -1  -8   1   36.56   10.06
  -1  -8   1   25.97    5.06
   1   8   0  443.45   33.84
  -1   8   0  439.07   32.28
   1  -8   0  388.48   28.73
  -1  -8   0  394.48   29.26
  -1  -8   0  430.26   24.52
   1   8   1   19.02   11.88
   1  -8   1   23.58    4.78
   1  -8   1   22.58    8.08
  -1  -8  -1   24.58    8.88
   1   8   2  929.39   59.15
   1   8   2  918.18   56.76
   1  -8   2  891.37   47.02
   1  -8   2  965.07   54.60
   1   8   3  138.56   19.87
   1   8   3  130.29   19.46
   1  -8   3  175.32   11.98
   1  -8   3  161.23   18.58
   1   8   4   87.82   16.49
   1   8   4  116.14   17.66
   1  -8   4  136.83   17.70
   1  -8   4  111.55    9.17
   1   8   5   -1.68    9.81
  -1   8  -5    7.55    9.02
   1  -8   5    7.80   12.44
   1  -8   5   -0.41    3.74
   1   8   6  120.55   18.94
  -1   8  -6  147.61   17.16
   1  -8   6  168.58   22.17
   1  -8   6  149.22   11.19
  -1   8  -7  -10.77   11.18
   1   8   7    7.00   11.83
   1  -8   7   10.83    4.53
   1  -8   7    9.26   13.80
  -1   8  -8  346.21   29.46
   1   8   8  334.02   31.73
   1  -8   8  340.35   33.65
  -1   8  -9   40.02   14.41
  -1   9   7   10.99   12.97
  -1  -9   7    1.13    5.26
  -1   9   6   87.29   18.15
  -1  -9   6  109.85   10.29
  -1   9   5   60.19   15.49
  -1  -9   5   67.54    7.91
  -1  -9   5   64.29   16.87
  -1   9   4  255.27   27.24
  -1  -9   4  295.72   27.81
  -1  -9   4  296.50   18.91
  -1   9   3   14.19   11.63
  -1  -9   3    8.24    4.56
  -1  -9   3    2.98   10.56
  -1   9   2  299.30   29.84
  -1  -9   2  289.52   18.53
  -1  -9   2  266.85   24.71
   1   9  -1   53.05   16.45
  -1   9   1   35.49   14.37
  -1  -9   1   39.81   10.88
  -1  -9   1   47.83    6.91
   1   9   0   53.11   16.05
  -1   9   0   71.91   15.58
  -1  -9   0   59.34   12.54
   1  -9   0   68.68   12.10
  -1  -9   0   57.52    7.32
  -1   9  -1    4.90   11.96
   1   9   1  -12.55   15.57
   1   9   1    6.70   11.85
   1  -9   1   -4.85    9.11
   1   9   2   76.28   17.66
   1   9   2   59.43   16.83
   1  -9   2   74.69   13.26
   1  -9   2   75.46    7.61
   1   9   3   21.17   13.64
   1  -9   3   26.86   11.05
   1  -9   3   13.89    4.51
   1   9   4    5.61   11.88
   1  -9   4    6.50    4.17
   1  -9   4   -3.11   10.30
   1   9   5   15.04   13.83
   1  -9   5   24.55    5.27
   1  -9   5   40.32   14.41
   1   9   6  596.97   45.84
   1  -9   6  625.59   46.09
   1  -9   6  620.17   34.10
   1  -9   7   33.41   16.91
  -1 -10   6   45.02    7.55
  -1  10   5   44.89   15.75
  -1 -10   5   52.30    7.77
  -1  10   4  329.77   32.46
  -1 -10   4  377.59   32.39
  -1 -10   4  351.56   22.43
  -1  10   3   23.77   13.51
  -1 -10   3   -3.19   11.18
  -1 -10   3    8.08    4.81
   1  10  -2  304.12   31.84
  -1  10   2  247.13   28.82
  -1 -10   2  275.96   26.28
  -1 -10   2  301.66   19.55
   1  10  -1   29.94   15.81
  -1  10   1    2.21   12.88
  -1 -10   1   10.13    5.26
  -1 -10   1   22.84   10.82
   1 -10   0  162.11   18.88
  -1 -10   0  171.32   19.37
   1  10   1   39.66   17.71
   1 -10   1   60.84   13.49
   1  10   2  345.25   35.02
   1 -10   2  285.65   27.26
   1 -10   2  352.69   21.51
   1  10   3  160.48   24.63
   1 -10   3  164.24   12.88
   1 -10   3  193.64   21.14
   1  10   4   14.55   14.52
   1 -10   4   26.24    5.91
   1 -10   5  206.03   24.46
  -1 -11   4    2.58    5.36
  -1 -11   3    4.56    5.34
  -1 -11   2   -2.63    5.49
  -2   0  13    1.79    4.69
   2   0 -13   -2.76   10.26
  -2   0  12  478.57   31.68
  -2   0  12  465.86   27.43
  -2   0  12  468.47   41.57
   2   0 -12  417.42   32.81
  -2   0  11  -10.37   16.41
  -2   0  11    0.50    4.21
  -2   0  11   -3.83    8.05
   2   0 -11    2.38    8.94
  -2   0  10  772.99   55.43
  -2   0  10  811.29   48.05
   2   0 -10  763.48   49.16
  -2   0  10  876.21   44.57
  -2   0   9    8.15   10.90
   2   0  -9    0.96    6.73
  -2   0   9    3.94    6.10
  -2   0   9    0.40    3.19
   2   0  -8   22.15    7.52
  -2   0   8   29.53    6.83
  -2   0   8   30.83    4.18
   2   0  -8   36.28    8.97
  -2   0   8   28.10   10.31
  -2   0   7    1.82    4.77
   2   0  -7    2.23    5.40
  -2   0   7    5.97    7.91
   2   0  -7   -0.75    6.79
   2   0  -7    1.30    2.92
  -2   0   7    0.61    2.57
   2   0  -6 3641.79  171.86
   2   0  -6 3636.25  168.36
  -2   0   6 3282.18  174.28
  -2   0   6 3291.25  170.32
   2   0  -6 3407.41  171.66
  -2   0   5   -4.45    5.67
   2   0  -5    2.13    3.87
   2   0  -5    3.31    2.29
  -2   0   5    3.09    6.53
   2   0  -5    0.50    4.77
  -2   0   5    0.43    4.00
  -2   0   4 1432.62   78.84
  -2   0   4 1459.65   76.32
  -2   0   4 1498.01   75.02
  -2   0   4 1616.86   77.67
   2   0  -4 1607.45   75.09
   2   0  -4 1662.09   77.39
  -2   0   3    0.57    1.45
  -2   0   3   -2.56    2.90
   2   0  -3   -0.55    1.85
  -2   0   3   -5.00    4.98
   2   0  -3    1.34    3.81
  -2   0   3    0.32    4.47
   2   0  -2 4259.22  200.37
  -2   0   2 4275.00  202.62
  -2   0   2 4126.45  200.67
  -2   0   2 4175.10  201.65
  -2   0   2 4167.86  200.43
  -2   0   1   -2.05    2.39
   2   0  -1   -0.67    0.96
   2   0  -1    0.58    1.66
  -2   0   1    0.14    0.92
  -2   0   1    0.70    2.71
   2   0   0  810.99   40.33
   2   0   0  801.88   39.28
  -2   0   0  864.60   40.47
  -2   0   0  782.27   39.31
  -2   0   0  821.64   38.98
   2   0   1    1.82    2.70
  -2   0  -1   -0.57    0.67
  -2   0  -1   -1.07    0.96
  -2   0  -1   -2.58    2.34
   2   0   1   -1.02    0.98
   2   0   2  859.11   43.82
  -2   0  -2  907.03   44.31
   2   0   2  825.21   41.63
  -2   0  -2  875.76   41.63
  -2   0  -2  874.49   43.77
   2   0   3    2.17    4.08
   2   0   3    1.17    1.32
  -2   0  -3   -0.44    5.27
   2   0   3   -1.32    1.39
  -2   0  -3   -0.44    4.91
   2   0   4  701.29   37.85
   2   0   4  673.43   33.98
  -2   0  -4  652.28   37.86
  -2   0  -5    5.73    6.88
   2   0   5   -2.58    5.04
   2   0   5    1.60    1.69
  -2   0  -5    1.41    2.08
  -2   0  -6  429.82   27.61
  -2   0  -6  446.48   22.52
  -2   0  -6  458.46   28.59
   2   0   6  412.92   22.10
   2   0   6  373.47   26.26
   2   0   7   -0.87    5.47
   2   0   7    0.76    2.09
  -2   0  -7    2.46    6.20
  -2   0  -7   12.95    8.06
  -2   0  -7   -2.24    2.85
   2   0   8  807.68   40.66
   2   0   8  754.11   46.23
  -2   0  -8  756.52   45.99
   2   0   9    3.15    7.10
  -2   0  -9    1.02    6.90
   2   0   9   -0.34    2.67
   2   0  10  515.16   35.09
   2   0  10  538.90   28.83
  -2   0 -10  473.44   34.53
   2   0  11    3.82    3.53
   2   0  11   -1.21    8.16
  -2   0 -11    1.22    8.19
  -2   0 -12  297.87   25.73
   2   0  12  321.95   19.48
   2   0  12  280.99   25.55
   2   0  13   -1.58    4.60
   2   0  13  -12.29   10.73
  -2   0 -13    2.88    9.62
   2   0  14   50.51    7.82
   2  -1 -14  227.37   22.53
   2   1 -13   20.66   12.10
  -2   1  13   10.27    5.74
  -2  -1  13   19.14   10.12
  -2  -1  13    7.88    5.15
   2  -1 -13    5.15    8.80
   2   1 -12  284.29   26.74
  -2   1  12  345.75   20.97
  -2   1  12  316.27   33.12
  -2  -1  12  360.23   35.87
  -2  -1  12  284.83   24.16
   2  -1 -12  324.15   25.77
  -2  -1  12  324.08   20.82
   2   1 -11   43.41   11.80
  -2   1  11   37.99    6.10
  -2   1  11   29.41   14.84
  -2   1  11   35.08    9.10
   2  -1 -11   30.59    9.14
  -2  -1  11   47.11    6.47
  -2  -1  11   23.39   16.32
  -2  -1  11   34.38    9.25
   2   1 -10   39.14   11.00
  -2   1  10   31.98   13.16
  -2   1  10   43.01    9.21
  -2   1  10   51.82    6.31
  -2  -1  10   51.57   15.73
  -2  -1  10   58.59    6.70
  -2  -1  10   41.80    9.26
   2  -1 -10   55.39   10.45
  -2   1   9  120.01    9.34
  -2   1   9  130.94   15.94
   2   1  -9  114.95   13.86
  -2   1   9  100.57   11.83
  -2  -1   9  120.14    9.47
  -2  -1   9  114.58   12.84
   2  -1  -9  128.44   13.46
  -2  -1   9  108.81   18.77
  -2   1   8   67.06   10.78
   2   1  -8   80.58   10.96
  -2   1   8   69.19    6.36
  -2   1   8   62.90    8.60
  -2  -1   8   77.90   14.56
  -2  -1   8   70.37    6.48
  -2  -1   8   65.99    8.95
   2  -1  -8   74.05   11.13
   2  -1  -8   78.97   10.04
   2   1  -7   31.66    4.35
   2   1  -7   29.81    8.97
  -2   1   7   26.11    6.03
   2   1  -7   28.66    7.40
   2  -1  -7   27.29    7.77
  -2  -1   7   29.95   10.65
  -2  -1   7   36.31    4.41
   2  -1  -7   26.73    6.43
  -2  -1   7   24.71    5.83
  -2   1   6 1049.97   58.35
  -2   1   6 1012.45   60.72
   2   1  -6 1187.37   60.76
   2   1  -6 1195.45   56.48
   2  -1  -6 1133.16   56.81
  -2  -1   6 1061.43   58.86
   2  -1  -6 1221.62   59.77
   2  -1  -6 1058.43   58.93
  -2  -1   6 1154.70   56.55
  -2  -1   6 1225.81   65.05
  -2  -1   6 1193.33   61.25
   2   1  -5  453.37   23.03
   2   1  -5  481.31   26.56
  -2   1   5  426.55   23.05
  -2   1   5  470.82   25.94
  -2   1   5  395.27   24.50
  -2   1   5  445.00   27.65
   2  -1  -5  458.72   23.46
   2  -1  -5  413.10   25.01
  -2  -1   5  481.10   30.02
   2  -1  -5  458.41   25.45
  -2  -1   5  417.37   24.95
  -2  -1   5  427.14   26.73
  -2   1   4  494.35   25.62
  -2   1   4  540.20   29.88
  -2   1   4  534.96   27.69
   2   1  -4  477.99   28.35
  -2   1   4  475.88   26.68
   2   1  -4  498.56   27.92
   2   1  -4  508.77   25.50
   2  -1  -4  515.74   27.25
  -2  -1   4  520.56   31.05
  -2  -1   4  491.16   28.53
  -2  -1   4  487.05   27.17
   2  -1  -4  524.33   25.90
   2  -1  -4  498.46   27.20
  -2   1   3   98.63    7.04
  -2   1   3  105.56    9.38
  -2   1   3  103.39    6.33
   2   1  -3   90.60   10.30
   2   1  -3   94.80    8.57
  -2   1   3  100.56    7.79
   2   1  -3  104.07    6.31
  -2  -1   3   99.67    6.47
  -2  -1   3   92.90    8.95
   2  -1  -3  112.99    7.47
  -2  -1   3   95.42   10.41
   2  -1  -3   94.50    7.29
  -2  -1   3   93.93    7.45
   2  -1  -3  109.10    6.61
  -2   1   244872.80 2075.95
   2   1  -243832.90 2077.60
  -2   1   244063.70 2076.46
   2   1  -238594.20 2078.29
   2   1  -242097.10 2075.87
  -2   1   242172.80 2075.72
  -2   1   245509.40 2077.75
   2  -1  -241420.80 2076.25
  -2  -1   243331.40 2078.94
  -2  -1   244199.10 2076.06
  -2  -1   241901.20 2077.82
   2  -1  -246320.00 2076.01
   2  -1  -245914.70 2075.90
  -2   1   110794.30  518.38
   2   1  -110968.80  519.49
  -2   1   111132.70  519.02
   2   1  -110848.90  518.38
   2   1  -110184.10  520.07
  -2   1   110806.30  518.24
  -2  -1   110832.70  519.45
  -2  -1   111101.30  518.50
  -2  -1   111263.40  520.22
  -2   1   0 1148.60   54.49
   2   1   0 1176.90   54.61
  -2   1   0 1130.36   53.83
  -2   1   0 1085.24   53.71
  -2   1   0 1084.11   54.31
   2   1   0 1102.47   54.15
   2   1   0 1249.12   56.55
   2   1   0  990.15   55.03
  -2  -1   0 1195.94   55.20
  -2  -1   0 1238.40   56.37
  -2  -1   0 1117.36   54.63
  -2  -1   0 1159.06   54.21
   2   1   1  556.29   29.14
  -2   1  -1  554.43   27.91
  -2   1  -1  545.33   26.22
   2   1   1  510.51   28.21
  -2   1  -1  522.38   27.76
   2   1   1  518.53   26.14
  -2  -1  -1  574.98   29.43
  -2  -1  -1  558.02   28.77
   2  -1   1  535.18   26.25
  -2  -1  -1  544.67   26.37
   2   1   2 4701.39  227.35
  -2   1  -2 4762.70  227.19
   2   1   2 4609.05  224.60
  -2   1  -2 4895.24  224.25
   2   1   2 4179.90  226.90
  -2   1  -2 4718.04  224.85
  -2   1  -2 4271.33  226.63
  -2  -1  -2 4788.72  227.46
   2  -1   2 4638.59  224.89
  -2  -1  -2 4763.82  227.85
   2  -1   2 4794.93  227.14
   2   1   3    1.80    4.06
  -2   1  -3   -0.92    5.22
  -2   1  -3    1.61    1.29
   2   1   3    0.68    1.07
  -2   1  -3    3.55    4.61
   2   1   3    3.82    4.41
  -2   1  -3    0.72    1.64
  -2  -1  -3    1.02    1.60
  -2  -1  -3   -2.33    5.20
   2  -1   3    0.83    1.15
   2  -1   3   -0.90    4.43
  -2   1  -4 5557.78  258.80
   2   1   4 5170.98  258.91
  -2   1  -4 5478.67  259.23
   2   1   4 5220.54  262.47
   2   1   4 4894.30  263.14
  -2   1  -4 5445.69  263.34
  -2   1  -4 5648.43  263.35
   2  -1   4 5458.74  258.64
   2  -1   4 5094.05  262.56
  -2  -1  -4 5537.69  258.84
  -2  -1  -4 5806.74  263.51
  -2   1  -5 1598.80   83.03
  -2   1  -5 1890.34   88.52
   2   1   5 1701.09   83.10
   2   1   5 1617.86   87.03
  -2   1  -5 1873.66   89.17
  -2   1  -5 1762.01   82.79
  -2  -1  -5 1723.70   87.92
  -2  -1  -5 1746.43   82.75
   2  -1   5 1635.89   87.11
   2  -1   5 1669.17   82.56
  -2  -1  -5 1852.91   88.11
  -2   1  -6  770.92   38.88
   2   1   6  768.85   39.13
   2   1   6  765.17   43.52
  -2   1  -6  876.99   46.34
  -2  -1  -6  838.91   45.35
  -2  -1  -6  780.02   38.80
  -2  -1  -6  819.96   44.73
   2  -1   6  764.56   38.66
   2  -1   6  726.23   43.39
   2   1   7    6.78    5.72
   2   1   7    1.69    2.39
  -2  -1  -7    9.05    5.80
  -2  -1  -7    3.01    2.39
   2  -1   7    0.85    6.04
  -2  -1  -7    8.37    8.34
   2  -1   7    2.43    2.06
   2   1   8  559.68   34.70
   2   1   8  546.09   28.93
  -2   1  -8  532.23   34.49
  -2  -1  -8  506.50   33.23
   2  -1   8  495.96   33.64
   2  -1   8  551.62   28.63
   2   1   9  134.20    9.87
  -2   1  -9  129.60   14.88
   2   1   9  164.39   16.25
   2  -1   9  140.24    9.65
  -2  -1  -9  132.15   14.53
   2  -1   9  138.19   14.89
  -2   1 -10 2241.57  121.82
   2   1  10 2336.77  114.86
   2   1  10 2154.82  121.13
   2  -1  10 2456.28  114.81
   2  -1  10 2306.46  121.63
  -2  -1 -10 2174.51  120.35
   2  -1  10 2215.00  127.93
  -2   1 -11  207.12   22.20
   2   1  11  246.16   22.60
   2   1  11  266.94   16.89
   2  -1  11  250.57   22.86
  -2  -1 -11  243.91   22.38
   2  -1  11  284.01   16.95
   2   1  12   15.54    4.56
  -2   1 -12    7.05   10.51
   2   1  12   14.28   11.27
   2  -1  12    2.35   16.35
  -2  -1 -12    6.29    8.68
   2  -1  12    9.40    4.82
   2  -1  12   10.43    9.80
   2   1  13    4.26    4.37
   2   1  13   -4.11   11.36
  -2   1 -13   -6.10   11.71
   2  -1  13   -4.12   10.40
   2  -1  13    2.07    4.21
  -2  -1 -13   -1.36    9.07
   2   2 -13   49.81   14.28
  -2   2  13   47.07    7.61
   2  -2 -13   46.04   10.86
  -2  -2  13   44.82    7.69
  -2  -2  13   29.71   10.52
  -2   2  12  126.97   11.30
   2   2 -12  132.36   18.09
  -2   2  12  104.48   20.77
  -2  -2  12  170.33   27.89
  -2  -2  12  146.14   12.07
   2  -2 -12  139.79   15.62
  -2  -2  12  136.35   15.57
  -2   2  11  102.01   10.05
  -2   2  11  123.38   18.10
   2   2 -11  142.67   17.25
  -2  -2  11  159.44   23.81
   2  -2 -11  118.89   14.07
  -2  -2  11  111.05   13.57
  -2  -2  11  129.49   10.74
  -2   2  10  689.58   40.55
   2   2 -10  664.99   43.54
  -2   2  10  678.54   37.07
  -2  -2  10  706.29   41.29
  -2  -2  10  730.51   37.65
  -2  -2  10  753.03   51.76
   2  -2 -10  671.49   40.86
   2   2  -9  347.65   26.84
  -2   2   9  318.66   23.69
  -2   2   9  379.62   21.50
  -2   2   9  301.40   26.53
  -2  -2   9  427.88   34.24
  -2  -2   9  378.74   21.71
   2  -2  -9  423.22   27.20
   2  -2  -9  351.72   24.57
  -2  -2   9  354.99   25.11
  -2   2   8  651.47   45.84
  -2   2   8  705.98   42.49
   2  -2  -8  802.94   44.62
  -2  -2   8  699.31   49.95
   2  -2  -8  824.69   39.36
   2  -2  -8  736.08   43.08
  -2  -2   8  781.66   40.47
  -2  -2   8  738.54   43.41
  -2   2   7   36.16    9.20
   2   2  -7   41.13    4.70
   2   2  -7   54.89    9.76
  -2   2   7   32.29    6.69
  -2  -2   7   51.69   12.84
  -2  -2   7   49.78    5.26
   2  -2  -7   40.87    6.80
   2  -2  -7   39.97    8.06
  -2  -2   7   35.42    6.91
  -2   2   6  101.85   11.97
  -2   2   6   87.90    6.82
  -2   2   6   89.19    8.69
   2   2  -6   91.93   10.52
   2   2  -6   75.79   11.27
   2   2  -6   77.12   10.28
   2   2  -6   86.07    6.59
  -2  -2   6   83.28   11.36
  -2  -2   6   92.04    7.00
  -2  -2   6  106.24    9.64
   2  -2  -6   84.73    8.53
  -2  -2   6   79.87   13.60
   2  -2  -6  110.13   12.17
   2  -2  -6  110.94   10.18
   2   2  -5 2195.62  115.77
  -2   2   5 2116.68  110.84
  -2   2   5 2192.16  109.64
  -2   2   5 2427.46  115.33
   2   2  -5 2232.19  109.32
   2   2  -5 2207.50  113.72
  -2  -2   5 2255.68  113.71
  -2  -2   5 2337.10  117.42
   2  -2  -5 2464.37  114.71
  -2  -2   5 2369.10  109.82
  -2  -2   5 2256.70  111.94
   2  -2  -5 2205.06  110.87
   2  -2  -5 2279.37  111.60
   2   2  -4 1828.81   88.04
   2   2  -4 1885.85   91.95
  -2   2   4 1723.97   88.25
  -2   2   4 1734.41   88.97
  -2   2   4 1904.78   92.19
   2   2  -4 1882.73   94.07
   2  -2  -4 1817.47   88.88
  -2  -2   4 1726.72   91.43
  -2  -2   4 1835.75   90.17
   2  -2  -4 1911.62   92.23
   2  -2  -4 1925.48   89.74
  -2  -2   4 1812.34   94.31
  -2   2   3  730.16   35.65
  -2   2   3  714.35   38.10
   2   2  -3  696.11   37.10
   2   2  -3  682.50   37.98
   2   2  -3  677.00   35.21
  -2   2   3  677.62   35.54
  -2   2   3  719.66   35.45
   2   2  -3  772.63   40.53
  -2  -2   3  667.01   37.93
   2  -2  -3  713.75   35.31
  -2  -2   3  744.21   40.52
   2  -2  -3  725.61   36.42
   2  -2  -3  768.82   38.85
  -2   2   234215.70 1538.32
   2   2  -232569.50 1538.09
   2   2  -231821.60 1535.97
  -2   2   232727.60 1535.97
   2   2  -233742.40 1539.79
  -2   2   234193.70 1535.64
   2  -2  -232104.40 1538.63
  -2  -2   234121.20 1540.00
   2  -2  -236617.10 1536.36
  -2   2   1   31.54    2.23
  -2   2   1   32.08    4.28
   2   2  -1   37.65    7.21
   2   2  -1   39.90    4.69
   2   2  -1   36.86    3.66
  -2   2   1   36.34    5.29
  -2  -2   1   31.06    3.08
  -2  -2   1   33.09    5.62
  -2   2   0  392.19   19.82
   2   2   0  389.70   20.31
  -2   2   0  396.18   20.66
   2   2   0  396.77   22.42
   2   2   0  452.56   23.82
  -2   2   0  400.42   21.62
  -2   2   0  440.25   19.69
   2   2   0  410.59   20.87
  -2  -2   0  401.29   20.36
  -2  -2   0  410.72   22.18
   2  -2   0  384.08   19.60
  -2  -2   0  370.93   20.87
   2  -2   0  355.08   20.98
   2   2   1   28.49    6.31
   2   2   1   28.33    5.77
   2   2   1   18.75    4.15
  -2   2  -1   23.00    2.17
  -2   2  -1   22.97    4.31
   2   2   1   19.41    2.10
  -2   2  -1   24.22    2.00
   2   2   1   23.14    2.69
  -2   2  -1   21.26    6.46
  -2  -2  -1   18.39    2.42
   2  -2   1   25.45    5.39
  -2  -2  -1   18.49    2.79
   2  -2   1   26.72    1.89
  -2   2  -2 1323.57   67.77
   2   2   2 1251.79   67.82
   2   2   2 1336.27   67.82
  -2   2  -2 1345.79   63.60
   2   2   2 1331.36   63.64
  -2   2  -2 1348.20   66.75
   2   2   2 1213.87   64.29
  -2   2  -2 1372.60   64.15
  -2  -2  -2 1323.34   63.84
  -2  -2  -2 1294.08   68.32
   2  -2   2 1231.48   67.25
   2  -2   2 1333.59   63.62
  -2   2  -3   23.30    7.83
   2   2   3    8.30    5.37
  -2   2  -3   14.76    6.11
   2   2   3   11.96    1.58
   2   2   3   12.43    5.28
  -2   2  -3   17.98    2.55
  -2   2  -3   13.87    1.75
   2  -2   3   10.95    4.17
  -2  -2  -3    9.68    6.12
   2  -2   3   15.08    2.03
  -2  -2  -3   14.47    1.86
  -2  -2  -3   11.97    7.38
   2  -2   3   17.84    6.98
   2   2   4  545.41   29.47
   2   2   4  628.36   34.74
  -2   2  -4  603.39   30.26
  -2   2  -4  571.46   34.67
   2   2   4  574.94   33.70
  -2   2  -4  608.48   29.51
  -2   2  -4  635.67   34.69
  -2  -2  -4  609.81   35.15
   2  -2   4  587.32   35.90
   2  -2   4  593.00   29.60
  -2  -2  -4  637.46   35.30
   2  -2   4  531.91   33.02
  -2  -2  -4  649.13   29.67
  -2   2  -5   17.93    3.04
   2   2   5    9.90    5.38
  -2   2  -5    8.65    5.23
  -2   2  -5   16.06    2.39
  -2   2  -5   20.79    7.59
   2   2   5   -2.43    5.82
  -2   2  -5   11.64    5.65
  -2  -2  -5   20.33    7.80
  -2  -2  -5   13.72    7.90
  -2  -2  -5   16.99    2.69
   2  -2   5    5.90    7.76
   2  -2   5   16.51    5.66
   2  -2   5   12.21    2.29
  -2   2  -6   -3.35    5.93
  -2   2  -6    3.46    6.91
  -2   2  -6    5.13    6.96
   2   2   6    8.96    7.36
  -2   2  -6    5.07    2.51
   2   2   6    5.55    2.50
  -2   2  -6    6.96    2.36
   2   2   6    6.02    5.61
   2  -2   6    7.65    5.66
   2  -2   6    5.42    2.27
  -2  -2  -6    3.72    2.07
  -2  -2  -6   10.34    7.70
  -2  -2  -6    9.49    8.05
   2  -2   6    3.50    9.03
   2   2   7 1416.70   70.58
  -2   2  -7 1287.18   75.57
   2   2   7 1458.44   78.51
  -2   2  -7 1438.95   69.86
   2   2   7 1363.11   75.22
  -2  -2  -7 1471.22   77.00
  -2  -2  -7 1487.54   69.63
   2  -2   7 1400.17   69.77
   2  -2   7 1412.15   79.79
   2  -2   7 1250.47   74.59
   2   2   8  397.75   23.11
   2   2   8  404.85   28.16
   2   2   8  432.89   31.92
  -2   2  -8  434.99   22.82
   2  -2   8  408.23   22.58
  -2  -2  -8  385.31   26.68
   2  -2   8  400.11   27.94
   2  -2   8  412.48   33.22
  -2  -2  -8  440.47   22.44
   2   2   9    4.23    7.95
   2   2   9   -7.22    9.95
   2   2   9    5.04    3.14
   2  -2   9   -3.13    8.32
   2  -2   9    1.75   14.28
  -2  -2  -9    8.01    6.99
   2  -2   9    1.01    3.06
   2   2  10  174.46   20.11
   2   2  10  182.80   18.62
   2   2  10  180.51   12.78
  -2   2 -10  166.68   18.66
   2  -2  10  196.32   12.69
  -2  -2 -10  174.55   17.16
   2  -2  10  198.23   18.75
   2  -2  10  222.49   25.79
  -2   2 -11  138.46   17.52
   2   2  11  115.60   16.45
   2   2  11  137.69   11.05
   2  -2  11  151.08   23.36
  -2  -2 -11  118.36   15.28
   2  -2  11  133.31   10.79
   2  -2  11  136.43   16.58
   2   2  12   34.24   11.90
  -2   2 -12   43.11   13.24
   2   2  12   41.48   13.94
   2   2  12   47.90    6.63
   2  -2  12   52.57    6.58
  -2  -2 -12   50.47   11.22
   2  -2  12   40.78   12.15
   2  -2  12   53.12   20.81
   2   2  13   21.72    5.93
  -2  -2 -13   20.43   11.12
  -2  -3  13  234.57   17.34
   2   3 -12   38.43   13.00
  -2   3  12   43.68    6.68
  -2   3  12   45.54   13.69
  -2  -3  12   45.01   21.25
  -2  -3  12   49.96    8.10
  -2  -3  12   38.99    9.93
   2  -3 -12   29.37    9.48
  -2   3  11  226.95   15.31
  -2  -3  11  224.80   19.46
  -2  -3  11  220.19   15.61
  -2  -3  11  233.21   30.21
   2  -3 -11  229.94   18.51
  -2   3  10   -1.52    9.96
  -2   3  10   -0.48    4.00
  -2  -3  10    0.99    4.83
  -2  -3  10    2.88    6.91
   2  -3 -10    0.80    6.49
  -2  -3  10    2.08   16.55
  -2   3   9  583.57   40.55
   2   3  -9  546.33   38.30
  -2   3   9  517.41   34.41
  -2  -3   9  561.43   32.16
  -2  -3   9  618.15   45.15
   2  -3  -9  615.64   30.59
   2  -3  -9  597.26   34.56
   2  -3  -9  601.21   37.79
  -2  -3   9  605.68   36.16
  -2   3   8  308.42   21.52
  -2   3   8  294.54   26.06
   2   3  -8  320.88   24.52
  -2  -3   8  329.86   29.90
   2  -3  -8  342.50   17.68
   2  -3  -8  293.75   20.59
  -2  -3   8  314.88   22.26
   2  -3  -8  304.86   23.22
  -2  -3   8  316.15   19.33
   2   3  -7   56.53    9.66
  -2   3   7   47.82    5.55
   2   3  -7   50.28    5.36
  -2   3   7   46.95    7.45
  -2   3   7   47.26   10.51
   2  -3  -7   62.08    9.62
  -2  -3   7   49.55    5.69
  -2  -3   7   45.99   13.68
  -2  -3   7   54.00    7.84
   2  -3  -7   55.02    4.40
   2  -3  -7   44.57    6.78
  -2   3   6  496.26   30.77
  -2   3   6  564.79   35.27
  -2   3   6  555.00   29.57
   2   3  -6  525.96   28.94
   2   3  -6  568.55   34.32
  -2  -3   6  564.48   38.39
   2  -3  -6  628.73   36.09
   2  -3  -6  577.76   32.87
   2  -3  -6  598.44   28.00
  -2  -3   6  545.53   32.21
  -2  -3   6  512.61   29.51
   2  -3  -6  535.38   30.16
  -2   3   5   39.87    4.42
  -2   3   5   35.68    5.33
   2   3  -5   35.78    7.69
   2   3  -5   39.25    4.24
   2   3  -5   55.65   11.28
  -2   3   5   37.55    7.76
  -2  -3   5   41.98    5.16
   2  -3  -5   41.63    3.15
   2  -3  -5   34.76    9.20
   2  -3  -5   39.16    4.58
  -2  -3   5   24.77   10.23
   2  -3  -5   36.13    7.20
   2   3  -4   56.61    4.89
  -2   3   4   56.03    5.90
   2   3  -4   55.21    8.20
   2   3  -4   43.31   10.52
   2   3  -4   51.00    7.46
  -2   3   4   53.61    7.71
   2  -3  -4   58.12    7.32
   2  -3  -4   69.12    9.89
  -2  -3   4   48.31    5.24
  -2  -3   4   57.07   11.82
  -2   3   3   26.07    5.65
   2   3  -3   26.85    3.54
   2   3  -3   30.13    6.03
   2   3  -3   29.06    5.39
   2   3  -3   17.03    8.25
  -2   3   3   24.57    4.02
  -2  -3   3   24.61    3.49
   2  -3  -3   35.85    8.09
  -2  -3   3   38.77    9.22
   2  -3  -3   31.21    5.13
  -2   3   2  715.00   38.38
   2   3  -2  745.36   37.63
   2   3  -2  679.78   35.21
   2   3  -2  683.83   40.12
  -2   3   2  693.11   36.32
  -2   3   2  685.29   36.77
  -2  -3   2  726.58   37.54
  -2  -3   2  713.10   39.42
   2   3  -1 4345.33  218.40
  -2   3   1 4584.42  216.70
  -2   3   1 4428.33  213.52
   2   3  -1 4482.33  214.94
   2   3  -1 4655.31  216.45
  -2   3   1 4549.87  214.72
  -2  -3   1 4709.95  216.70
   2  -3  -1 4455.75  216.29
  -2  -3   1 4629.44  218.57
  -2   3   0  118.75    6.27
  -2   3   0  111.91    6.89
   2   3   0  116.96    7.86
  -2   3   0  118.79    8.15
   2   3   0  141.45   11.85
   2   3   0  119.11    7.56
  -2   3   0  116.69    9.79
   2   3   0  116.18   10.22
  -2  -3   0  110.49    9.54
  -2  -3   0  132.03    8.39
   2  -3   0  103.90    8.63
  -2  -3   0  119.03    7.42
   2   3   1 5044.35  247.81
  -2   3  -1 5326.39  251.43
  -2   3  -1 5155.72  249.68
   2   3   1 5286.99  252.94
  -2   3  -1 5176.08  247.66
   2   3   1 5263.80  250.79
  -2   3  -1 5276.26  247.60
   2   3   1 5225.30  248.40
  -2  -3  -1 4975.83  250.40
   2  -3   1 5330.49  247.67
  -2  -3  -1 5210.84  248.43
   2  -3   1 4601.53  250.50
  -2  -3  -1 5225.97  248.41
  -2   3  -2  313.95   19.62
  -2   3  -2  327.40   16.89
   2   3   2  300.38   21.42
   2   3   2  327.99   17.49
   2   3   2  343.37   19.96
   2   3   2  332.04   16.24
  -2   3  -2  326.14   16.61
   2   3   2  305.28   21.60
  -2   3  -2  323.48   22.01
  -2  -3  -2  318.97   16.92
   2  -3   2  305.64   18.84
  -2  -3  -2  338.84   21.61
  -2  -3  -2  313.45   17.45
   2  -3   2  325.44   16.61
   2  -3   2  333.51   21.04
   2   3   3 2076.33  105.24
   2   3   3 1976.55  100.38
   2   3   3 2038.64   99.03
  -2   3  -3 2023.14  103.47
  -2   3  -3 2153.56  105.58
  -2   3  -3 2124.64  100.03
   2   3   3 2036.90  104.60
  -2   3  -3 2109.45   99.42
  -2   3  -3 2073.37  103.53
  -2  -3  -3 2051.07   99.36
  -2  -3  -3 2097.06  104.97
  -2  -3  -3 2070.71  106.22
   2  -3   3 2063.10   99.51
   2  -3   3 2202.54  105.78
   2   3   4  217.20   16.88
   2   3   4  244.91   18.32
  -2   3  -4  246.12   17.49
  -2   3  -4  244.89   19.92
   2   3   4  234.64   12.51
  -2   3  -4  250.58   12.79
  -2   3  -4  218.26   17.44
  -2   3  -4  245.61   13.61
   2  -3   4  246.30   19.67
  -2  -3  -4  241.60   12.60
   2  -3   4  232.07   13.02
  -2  -3  -4  251.03   19.69
  -2  -3  -4  258.71   19.44
   2   3   5  225.17   18.27
  -2   3  -5  276.47   15.07
   2   3   5  284.87   20.39
  -2   3  -5  248.76   13.97
  -2   3  -5  250.68   19.16
  -2   3  -5  241.72   21.15
   2   3   5  239.27   15.19
  -2   3  -5  276.97   20.13
   2  -3   5  260.29   18.33
  -2  -3  -5  275.06   13.86
   2  -3   5  254.88   21.91
   2  -3   5  259.65   14.39
  -2  -3  -5  267.48   21.35
  -2  -3  -5  264.57   20.87
   2   3   6  120.37   13.66
  -2   3  -6   90.65   11.86
  -2   3  -6  112.33   13.70
  -2   3  -6  110.73    7.29
   2   3   6  114.98   12.08
   2  -3   6  113.92   11.74
  -2  -3  -6  100.15   13.81
   2  -3   6  106.09   15.27
   2  -3   6  114.31    7.62
  -2  -3  -6  112.12    7.03
   2   3   7   38.44    9.64
  -2   3  -7   24.99    8.18
   2   3   7   29.57    8.09
   2   3   7   27.34    4.32
  -2   3  -7   39.14    4.19
   2  -3   7   32.50    7.91
  -2  -3  -7   32.88    3.72
   2  -3   7   39.01    4.40
   2  -3   7   21.56   11.72
  -2  -3  -7   30.19   10.11
   2   3   8  156.44   17.89
   2   3   8  106.87   13.83
   2   3   8  115.53    9.84
  -2   3  -8  137.38   15.09
  -2  -3  -8  184.53   10.18
   2  -3   8  126.31   14.25
  -2  -3  -8  137.50   13.00
   2  -3   8  143.63    9.79
   2  -3   8  127.58   18.66
   2   3   9  118.64   17.37
   2   3   9  114.32   14.30
  -2   3  -9   98.76   14.44
   2   3   9  113.29    9.56
  -2  -3  -9  133.90   13.27
   2  -3   9  112.80   14.12
   2  -3   9  156.30   22.20
   2  -3   9  130.39    9.31
  -2   3 -10  241.46   24.58
   2   3  10  291.90   28.56
   2   3  10  247.46   23.42
   2   3  10  324.53   19.22
  -2  -3 -10  274.95   22.11
   2  -3  10  299.50   24.44
   2  -3  10  348.37   33.33
   2  -3  10  321.19   18.57
   2   3  11  426.02   36.63
   2   3  11  444.38   33.80
   2   3  11  478.55   27.75
   2  -3  11  514.16   43.78
   2  -3  11  503.59   34.30
   2  -3  11  502.60   27.35
  -2  -3 -11  426.80   31.13
  -2   3 -12   79.97   16.92
   2   3  12  124.87   17.13
   2   3  12   95.33    9.53
   2  -3  12  100.24    9.49
  -2  -3 -12   87.02   13.14
   2  -3  12  116.86   25.66
   2  -3  12  122.06   16.09
   2   3  13  253.73   17.81
  -2  -4  13  118.83   12.68
  -2   4  12    9.03    5.57
  -2  -4  12    3.06    6.75
   2   4 -11    3.01   10.38
  -2   4  11   11.64    4.85
  -2   4  11    5.32   12.67
  -2  -4  11   11.73   18.18
  -2  -4  11    6.23    6.47
   2   4 -10  286.96   25.74
  -2   4  10  289.92   28.13
   2  -4 -10  293.64   20.61
  -2  -4  10  272.38   31.90
  -2  -4  10  308.33   19.67
   2   4  -9    8.99    9.02
  -2   4   9    3.12   10.94
   2  -4  -9    1.13   11.06
   2  -4  -9    4.10    5.05
  -2  -4   9   -3.91   17.54
  -2  -4   9    5.26    5.97
  -2   4   8  137.39   10.98
   2   4  -8  138.87   15.90
  -2   4   8  125.69   12.83
  -2   4   8  135.24   17.46
   2  -4  -8  133.12   11.31
  -2  -4   8  166.43   22.19
  -2  -4   8  155.34   11.96
   2  -4  -8  130.00   15.72
   2  -4  -8  158.84    8.98
  -2   4   7 1760.86   96.37
  -2   4   7 1697.79   89.22
   2   4  -7 1690.30   94.83
  -2   4   7 1626.14   90.71
  -2  -4   7 1792.34  100.65
   2  -4  -7 1915.00   86.94
   2  -4  -7 1845.81   93.92
  -2  -4   7 1772.38   89.42
   2  -4  -7 1729.44   89.07
  -2   4   6 1017.48   46.38
   2   4  -6 1026.12   50.55
   2   4  -6  968.99   43.75
  -2   4   6  994.07   51.22
  -2   4   6  995.15   44.68
   2  -4  -6 1034.36   48.87
  -2  -4   6 1028.37   44.86
  -2  -4   6 1009.11   55.60
   2  -4  -6 1046.50   41.81
  -2   4   5  280.73   22.25
  -2   4   5  322.96   19.63
   2   4  -5  315.81   17.94
   2   4  -5  327.07   22.76
  -2  -4   5  381.34   27.16
  -2  -4   5  312.72   22.73
   2  -4  -5  321.38   15.98
   2  -4  -5  361.93   21.56
  -2  -4   5  330.22   18.69
   2  -4  -5  309.01   24.52
   2   4  -4  422.45   23.40
   2   4  -4  387.82   30.02
  -2   4   4  391.49   24.58
   2   4  -4  467.81   27.59
   2   4  -4  436.39   26.58
  -2   4   4  421.31   27.81
  -2  -4   4  470.88   24.06
  -2  -4   4  430.08   30.32
   2  -4  -4  465.86   25.86
  -2  -4   4  439.58   27.59
   2  -4  -4  480.48   30.56
  -2   4   3 2564.02  130.37
  -2   4   3 2628.39  128.37
   2   4  -3 2552.53  125.72
   2   4  -3 2700.47  129.29
  -2   4   3 2523.64  127.61
   2   4  -3 2401.23  131.76
   2   4  -3 2615.01  128.21
  -2  -4   3 2510.14  129.01
  -2  -4   3 2693.14  126.08
  -2  -4   3 2553.18  132.03
   2   4  -2 6749.67  331.68
  -2   4   2 6598.48  330.78
  -2   4   2 6699.60  328.62
  -2   4   2 7094.01  326.31
   2   4  -2 6595.26  326.20
  -2   4   2 6665.52  328.27
   2   4  -2 7020.71  328.86
  -2  -4   2 7110.62  331.72
  -2  -4   2 6723.72  326.50
  -2  -4   2 6982.03  328.72
  -2   4   1  479.09   24.16
  -2   4   1  510.80   25.74
   2   4  -1  476.40   30.85
  -2   4   1  586.05   29.50
  -2   4   1  552.47   25.19
   2   4  -1  526.83   27.75
   2   4  -1  507.87   26.11
  -2  -4   1  607.50   31.26
   2  -4  -1  529.89   28.15
  -2  -4   1  543.08   28.00
  -2   4   0    3.98    1.17
  -2   4   0    2.90    3.11
  -2   4   0    1.94    1.99
   2   4   0    1.97    3.01
   2   4   0    2.39    6.56
  -2   4   0    1.66    5.58
  -2   4   0    4.17    3.20
   2   4   0    1.26    6.18
   2   4   0    3.21    2.61
   2  -4   0    2.80    1.78
   2  -4   0    2.36    4.08
  -2  -4   0    1.27    3.42
  -2  -4   0    6.94    4.61
   2   4   1    0.49    1.83
   2   4   1    3.16    5.92
  -2   4  -1    1.15    3.78
   2   4   1   -0.72    2.46
  -2   4  -1    2.97    2.01
   2   4   1    1.20    5.49
  -2   4  -1    1.27    7.58
  -2   4  -1    1.24    1.40
  -2   4  -1    0.40    4.47
  -2  -4  -1    1.62    4.06
  -2  -4  -1    2.20    3.05
   2  -4   1    5.76    4.72
   2  -4   1    0.51    1.53
  -2  -4  -1    2.49    2.21
  -2   4  -2  464.68   24.34
   2   4   2  492.67   31.17
  -2   4  -2  475.35   27.51
   2   4   2  464.37   27.95
  -2   4  -2  529.73   30.95
   2   4   2  479.95   25.22
  -2   4  -2  454.61   27.33
   2   4   2  471.37   30.22
  -2   4  -2  504.46   24.40
   2   4   2  484.52   23.64
  -2  -4  -2  486.27   25.36
  -2  -4  -2  457.57   24.69
   2  -4   2  477.97   29.02
   2  -4   2  458.45   24.29
  -2  -4  -2  541.40   30.50
  -2   4  -3    3.11    2.44
  -2   4  -3    8.65    9.04
  -2   4  -3    4.31    4.91
   2   4   3    3.27    2.87
   2   4   3    1.40    1.15
  -2   4  -3    2.68    1.99
  -2   4  -3    0.61    6.01
   2   4   3   -0.59    4.88
   2   4   3    8.54    6.66
   2   4   3    1.80    5.72
  -2  -4  -3   -2.32    6.55
  -2  -4  -3    4.33    2.23
   2  -4   3    2.48    3.85
   2  -4   3    6.52    6.81
   2  -4   3    1.25    1.81
  -2   4  -4 1108.85   58.33
  -2   4  -4 1001.19   54.67
   2   4   4  938.83   56.30
  -2   4  -4 1037.05   55.18
  -2   4  -4 1066.65   50.45
  -2   4  -4 1034.10   49.71
   2   4   4  904.06   54.69
   2   4   4  993.03   48.96
   2   4   4 1042.47   51.12
   2   4   4 1076.09   54.50
  -2  -4  -4 1026.81   56.46
  -2  -4  -4  980.18   49.46
   2  -4   4 1038.41   49.94
   2  -4   4  875.68   52.95
   2  -4   4 1062.93   57.58
   2   4   5  916.99   51.01
  -2   4  -5  927.09   45.50
  -2   4  -5  926.26   51.65
  -2   4  -5  785.47   50.79
   2   4   5  889.81   52.71
  -2   4  -5  974.63   46.59
  -2   4  -5  927.28   54.49
  -2  -4  -5  915.20   52.80
  -2  -4  -5  904.90   45.09
   2  -4   5  982.24   55.51
   2  -4   5  903.22   45.85
  -2   4  -6   92.85   12.30
  -2   4  -6   81.93    6.50
   2   4   6  101.83   11.82
   2   4   6  111.34   13.55
  -2  -4  -6  117.14   14.68
   2  -4   6   95.96    7.30
  -2  -4  -6  100.83    6.25
   2  -4   6   80.26   15.59
   2   4   7  389.86   27.68
  -2   4  -7  367.65   28.28
   2   4   7  406.25   30.18
  -2  -4  -7  421.51   21.49
  -2  -4  -7  390.92   24.66
   2  -4   7  414.81   22.57
   2  -4   7  415.24   27.57
   2  -4   7  420.72   32.99
   2   4   8    9.04    4.23
  -2   4  -8   25.82    9.04
   2   4   8    1.00    7.55
   2   4   8   11.52    9.35
   2  -4   8   10.13    4.59
  -2  -4  -8   11.77    5.70
   2  -4   8   17.73    7.30
   2  -4   8   15.26   14.18
  -2  -4  -8   14.22    3.06
  -2   4  -9  111.99   14.98
   2   4   9   75.10    8.34
   2   4   9   77.44   12.88
   2   4   9   95.19   16.65
  -2  -4  -9   74.54    9.89
   2  -4   9   83.53   19.61
   2  -4   9  100.47   12.93
   2  -4   9   93.05    8.43
   2   4  10  537.21   40.44
  -2   4 -10  488.12   36.08
   2   4  10  472.34   28.56
   2   4  10  480.43   34.24
   2  -4  10  515.85   34.35
  -2  -4 -10  460.33   30.93
   2  -4  10  535.11   28.24
   2  -4  10  523.03   43.04
   2   4  11  110.71   10.23
   2   4  11   86.94   18.24
  -2   4 -11  114.50   17.44
   2  -4  11  111.36   15.28
   2  -4  11   78.87   23.84
   2  -4  11  120.76   10.35
   2   4  12   -5.29    5.36
  -2  -5  12   64.25   10.59
   2   5 -11  610.11   44.27
  -2   5  11  620.20   47.49
  -2  -5  11  726.01   55.69
  -2  -5  11  651.16   36.90
   2   5 -10  202.68   21.66
  -2   5  10  211.82   24.55
  -2  -5  10  208.16   31.31
  -2  -5  10  219.18   16.12
  -2   5   9  456.48   27.10
  -2   5   9  471.67   36.25
   2   5  -9  468.26   34.10
  -2  -5   9  499.89   41.91
  -2  -5   9  476.97   27.58
   2   5  -8  638.59   34.61
  -2   5   8  618.11   36.14
  -2   5   8  569.68   26.31
   2  -5  -8  628.46   32.76
  -2  -5   8  700.61   42.84
  -2  -5   8  635.81   26.81
   2   5  -7  726.81   45.29
  -2   5   7  799.25   47.29
  -2   5   7  694.21   39.32
  -2  -5   7  687.77   49.99
   2  -5  -7  754.81   43.45
  -2  -5   7  724.05   39.46
   2  -5  -7  751.01   36.13
  -2   5   6 1351.23   68.92
  -2   5   6 1371.71   70.28
   2   5  -6 1398.77   74.46
  -2   5   6 1355.69   75.17
   2  -5  -6 1483.79   72.44
   2  -5  -6 1334.56   65.81
  -2  -5   6 1442.56   69.01
  -2  -5   6 1559.76   80.23
  -2   5   5   50.79    7.37
   2   5  -5   50.41    9.53
  -2   5   5   59.65    9.73
   2   5  -5   55.27    5.61
  -2  -5   5   55.56    6.07
  -2  -5   5   47.35   12.83
   2  -5  -5   62.40    8.63
  -2   5   4    4.76    5.69
  -2   5   4    4.06    4.96
   2   5  -4    4.61    3.18
  -2   5   4    2.20    4.36
   2   5  -4    1.54    5.95
  -2  -5   4    2.07    3.06
  -2  -5   4    1.56    6.54
  -2  -5   4    2.31    8.94
   2   5  -3  598.40   39.53
   2   5  -3  639.33   35.18
  -2   5   3  604.93   35.56
   2   5  -3  585.77   32.25
   2   5  -3  646.93   35.91
  -2   5   3  590.71   37.46
  -2   5   3  627.55   32.58
  -2   5   3  581.27   35.19
  -2  -5   3  640.99   36.06
  -2  -5   3  631.77   32.82
  -2  -5   3  709.63   39.77
  -2   5   2   63.92    8.03
   2   5  -2   58.23    6.26
   2   5  -2   83.93   13.30
  -2   5   2   85.66   10.86
   2   5  -2   81.50    8.51
  -2   5   2   79.14    9.00
  -2   5   2   64.17    5.72
  -2  -5   2   80.12    6.40
  -2  -5   2   70.44   10.46
  -2  -5   2   67.29    8.55
  -2   5   1   61.86    8.71
   2   5  -1   65.03    6.97
   2   5  -1   61.79    5.56
  -2   5   1   62.73    8.36
  -2   5   1   65.51    5.14
   2   5  -1   46.46   10.37
  -2   5   1   60.41    4.21
  -2   5   1   52.59    3.10
  -2  -5   1   58.27    5.37
   2  -5  -1   57.87    7.30
  -2  -5   1   59.52    7.20
  -2  -5   1   63.40    9.42
   2   5   0 1659.73   79.65
   2   5   0 1460.31   83.52
   2   5   0 1565.76   79.13
  -2   5   0 1573.77   80.02
  -2   5   0 1606.24   83.31
  -2   5   0 1566.58   77.30
   2   5   0 1866.36   86.97
  -2   5   0 1641.69   78.73
  -2   5   0 1759.24   79.63
   2  -5   0 1558.71   81.93
  -2  -5   0 1582.02   80.06
  -2  -5   0 1635.97   83.47
  -2   5  -1 5193.91  248.81
   2   5   1 5336.70  254.21
  -2   5  -1 5188.44  245.99
   2   5   1 5162.29  247.57
   2   5   1 5192.27  252.12
  -2   5  -1 5202.16  249.27
  -2   5  -1 5025.19  246.70
   2   5   1 5130.95  246.54
  -2   5  -1 5021.37  252.25
  -2  -5  -1 5105.17  247.55
  -2  -5  -1 5042.79  251.01
   2  -5   1 4946.96  251.18
   2  -5   1 5259.02  246.84
  -2   5  -2   18.46   11.08
   2   5   2   22.86    8.40
  -2   5  -2   19.97    5.98
  -2   5  -2   18.80    3.11
   2   5   2   11.54    8.14
   2   5   2   17.45    1.89
  -2   5  -2   21.61    2.81
   2   5   2   15.89    3.64
   2   5   2   20.76    7.03
  -2   5  -2   18.65    5.41
  -2  -5  -2   12.08    3.02
  -2  -5  -2   25.06    3.69
   2  -5   2   19.82    2.94
   2  -5   2   21.45    7.14
  -2   5  -3 1194.96   69.78
   2   5   3 1168.69   73.26
   2   5   3 1200.20   70.31
   2   5   3 1216.59   73.05
  -2   5  -3 1197.29   70.01
  -2   5  -3 1258.65   66.11
  -2   5  -3 1238.16   73.33
  -2   5  -3 1236.50   65.98
   2   5   3 1212.90   67.02
  -2  -5  -3 1363.71   72.55
  -2  -5  -3 1217.19   65.93
   2  -5   3 1187.86   71.69
   2  -5   3 1289.89   66.17
  -2   5  -4  684.09   39.42
   2   5   4  676.28   42.13
   2   5   4  625.03   40.53
  -2   5  -4  668.79   34.14
  -2   5  -4  700.54   43.18
   2   5   4  656.85   32.87
  -2   5  -4  710.20   34.70
   2  -5   4  706.18   34.49
  -2  -5  -4  682.45   33.96
  -2  -5  -4  732.74   41.63
   2  -5   4  646.24   41.66
  -2   5  -5    7.18    6.41
  -2   5  -5    3.31    2.55
   2   5   5    9.29    7.69
   2   5   5   -2.75    7.37
  -2  -5  -5   10.65    2.58
   2  -5   5    4.34    4.99
   2  -5   5    3.60    2.59
  -2  -5  -5    4.12    9.41
   2  -5   5    3.68   10.30
  -2   5  -6   20.23    8.30
   2   5   6   -0.94    7.57
   2  -5   6   12.23    3.40
   2  -5   6   14.11   13.56
  -2  -5  -6    6.58    2.40
   2   5   7  135.58   14.75
   2   5   7  115.86   15.31
  -2   5  -7   99.25   13.78
  -2  -5  -7  115.94    7.59
   2  -5   7  121.30    8.90
  -2  -5  -7  125.21   10.31
   2  -5   7  110.40   20.34
   2   5   8  151.75   16.13
   2   5   8  127.50   16.95
  -2   5  -8  149.44   16.91
   2  -5   8  137.85   10.11
   2  -5   8  137.60   22.68
   2  -5   8  123.56   14.29
  -2  -5  -8  128.02   11.54
   2   5   9  728.09   42.42
   2   5   9  810.09   52.69
   2   5   9  759.64   47.82
  -2   5  -9  803.98   50.25
   2  -5   9  807.84   47.47
   2  -5   9  849.73   41.71
  -2  -5  -9  720.17   43.16
   2   5  10   43.96   14.75
   2   5  10   26.78    6.02
  -2   5 -10   13.40   11.09
   2  -5  10   34.12   10.17
   2  -5  10   31.78    6.46
   2  -5  10   26.45   18.81
   2   5  11   37.93    6.89
  -2   5 -11   30.82   12.38
   2   5  11   21.06   15.25
   2  -5  11    9.64   22.27
   2  -5  11   30.44   10.58
  -2  -6  11  328.30   21.91
  -2   6  10   20.92    5.97
   2   6 -10   21.60   13.34
  -2   6  10   22.72   13.91
  -2  -6  10   25.91    6.91
  -2   6   9  225.27   16.78
   2   6  -9  259.02   24.00
  -2   6   9  262.17   26.16
  -2  -6   9  264.39   17.21
   2   6  -8   75.70   14.02
  -2   6   8   73.30    8.33
  -2   6   8   71.79   14.14
  -2  -6   8   84.69    8.89
  -2   6   7  628.04   35.17
   2   6  -7  609.30   40.88
  -2   6   7  633.45   42.64
  -2  -6   7  661.11   35.24
   2   6  -6  482.97   33.60
  -2   6   6  473.67   34.80
  -2  -6   6  534.14   28.96
   2   6  -5   80.56   11.68
  -2   6   5   90.88   12.76
  -2   6   5   76.60    9.90
  -2  -6   5   96.70    8.42
  -2   6   4  198.17   15.78
  -2   6   4  164.61   17.85
   2   6  -4  234.07   17.66
  -2  -6   4  195.95   13.18
  -2  -6   4  194.67   20.02
  -2   6   3  741.04   47.47
   2   6  -3  847.59   45.01
  -2   6   3  703.13   44.66
  -2  -6   3  804.49   45.13
  -2  -6   3  710.06   47.55
  -2  -6   3  829.60   41.76
   2   6  -2  660.38   37.63
  -2   6   2  679.57   35.16
  -2   6   2  676.35   39.33
  -2   6   2  592.57   41.12
  -2   6   2  684.45   40.28
  -2  -6   2  591.46   40.92
  -2  -6   2  699.36   35.63
  -2  -6   2  667.05   37.98
  -2   6   1  172.10    9.10
   2   6  -1  197.55   13.46
  -2   6   1  213.59   16.54
  -2   6   1  195.60   10.27
  -2   6   1  213.13   16.93
  -2   6   1  206.82   11.78
   2  -6  -1  233.78   15.90
  -2  -6   1  190.32   16.67
  -2  -6   1  198.52   13.93
  -2  -6   1  201.79   12.17
   2   6   0  659.88   34.78
   2   6   0  758.42   42.91
  -2   6   0  653.69   34.53
  -2   6   0  648.06   34.12
  -2   6   0  671.22   35.97
  -2   6   0  668.12   32.39
  -2   6   0  601.95   39.29
  -2  -6   0  569.53   38.07
  -2  -6   0  650.40   35.49
  -2  -6   0  656.05   34.77
   2  -6   0  668.02   38.15
  -2   6  -1   86.61    7.19
  -2   6  -1  100.87    9.21
   2   6   1   88.84   13.50
  -2   6  -1  107.61   14.27
  -2   6  -1  103.32    6.43
   2   6   1  103.38    7.08
  -2   6  -1  112.04   10.43
  -2  -6  -1  106.80    8.37
   2  -6   1  108.44    7.63
  -2  -6  -1   94.67   11.26
   2  -6   1  106.38   11.53
   2   6   2   72.67    4.69
  -2   6  -2   72.40    9.41
  -2   6  -2   82.63    5.70
  -2   6  -2   95.89   15.32
   2   6   2   78.17   12.32
   2   6   2   65.20   12.35
  -2   6  -2   76.08    6.27
  -2   6  -2   78.53    8.98
   2  -6   2   79.16    6.25
  -2  -6  -2   77.50    6.38
   2  -6   2   86.98   11.51
   2   6   3   97.91   14.41
  -2   6  -3  118.17   11.72
  -2   6  -3  107.88    7.44
  -2   6  -3  111.11    8.06
   2   6   3  118.10   15.44
  -2  -6  -3  108.38    7.30
   2  -6   3   99.82    7.53
   2  -6   3  115.72   14.13
   2   6   4   82.64   13.23
  -2   6  -4   90.84    7.17
  -2   6  -4  102.52   12.05
   2   6   4   93.99   14.12
   2  -6   4   93.88    7.09
   2  -6   4   88.83   13.82
  -2   6  -5 3644.95  183.54
   2   6   5 3402.20  186.28
   2   6   5 3444.99  184.22
   2  -6   5 3788.19  177.54
   2  -6   5 3582.20  186.89
  -2   6  -6  468.95   31.99
   2   6   6  419.30   30.76
   2   6   6  416.24   33.02
   2  -6   6  475.68   35.93
   2  -6   6  474.73   25.24
  -2   6  -7   -6.01    9.45
   2   6   7   11.87   10.22
   2   6   7   -1.08    8.43
   2  -6   7    6.21    3.58
   2  -6   7    8.30   14.31
   2   6   8    2.22    9.67
   2   6   8    8.15   10.11
  -2   6  -8    6.64    9.65
   2  -6   8   -1.85   16.09
   2  -6   8    2.24    3.69
   2   6   9  104.68   10.40
   2   6   9   95.58   17.73
  -2   6  -9   97.56   15.98
   2  -6   9  111.18    9.12
   2  -6   9  110.92   23.14
   2   6  10   33.96   14.68
  -2   6 -10   39.71   13.49
   2   6  10   18.06    5.88
   2  -6  10   40.79   21.79
  -2   7  10   -1.98   13.77
  -2  -7  10    0.62    5.89
   2   7  -9  242.43   23.84
  -2   7   9  230.61   17.06
  -2   7   9  230.38   25.85
  -2  -7   9  247.97   17.15
   2   7  -8   12.33   11.03
  -2   7   8   16.37    5.28
  -2   7   8   22.78   12.43
  -2  -7   8   18.54    5.42
   2   7  -7  240.92   22.11
  -2   7   7  215.68   16.05
  -2   7   7  261.71   24.60
  -2  -7   7  248.36   16.22
  -2   7   6   53.96   12.76
   2   7  -6   67.76   12.30
  -2  -7   6   61.81    7.60
  -2   7   5  350.35   29.35
   2   7  -5  410.33   28.37
  -2  -7   5  395.08   23.17
   2   7  -4  117.97   13.56
  -2   7   4  123.92   16.06
  -2  -7   4  119.71    9.90
  -2   7   3  173.83   16.53
  -2   7   3  162.16   18.07
   2   7  -3  176.02   15.38
  -2  -7   3  203.36   16.68
  -2  -7   3  177.07   12.43
   2   7  -2  208.90   16.17
  -2   7   2  227.69   19.02
  -2   7   2  194.76   20.24
  -2  -7   2  222.53   16.91
  -2  -7   2  211.01   14.00
  -2   7   1  330.52   24.38
   2   7  -1  309.72   20.04
   2   7  -1  325.01   27.64
  -2  -7   1  325.41   19.15
   2  -7  -1  309.08   22.49
  -2  -7   1  321.57   20.96
   2   7   0  917.97   46.81
   2   7   0  979.26   56.27
  -2   7   0  909.97   48.66
  -2  -7   0  918.46   47.23
   2  -7   0  818.03   50.30
  -2  -7   0  915.38   47.92
   2   7   1   46.04   11.75
  -2   7  -1   42.03    5.24
  -2   7  -1   60.40    7.62
   2  -7   1   48.90    5.33
  -2  -7  -1   46.40    5.81
  -2  -7  -1   52.47    6.19
   2  -7   1   42.97    9.03
   2   7   2   58.02   13.64
  -2   7  -2   48.28    5.59
   2   7   2   41.99   12.55
  -2   7  -2   46.20    8.31
  -2  -7  -2   44.82    5.12
   2  -7   2   33.23    8.89
   2  -7   2   47.40    5.16
   2   7   3   69.32   14.39
  -2   7  -3   75.22   10.42
   2   7   3   60.11   13.13
   2  -7   3   78.00   12.78
   2  -7   3   76.58    6.36
  -2  -7  -3   63.65    5.09
   2   7   4    9.30   10.08
  -2   7  -4   18.42    8.56
   2   7   4   16.54   10.67
   2  -7   4   14.01    3.57
   2  -7   4   24.33    9.94
  -2   7  -5  503.17   34.48
   2   7   5  493.67   37.49
   2   7   5  467.09   35.03
   2  -7   5  526.62   28.13
   2  -7   5  587.61   38.58
   2   7   6   30.99   10.51
  -2   7  -6   18.68    8.68
   2   7   6   28.05   11.92
   2  -7   6   18.59    4.26
   2  -7   6   10.93   12.91
  -2   7  -7   41.39   11.48
   2   7   7   43.99   13.11
   2  -7   7   37.41    5.48
   2  -7   7   19.14   14.73
   2   7   8  586.45   46.35
  -2   7  -8  695.49   45.84
   2  -7   8  690.28   36.43
   2  -7   8  711.42   51.11
  -2   7  -9  204.85   22.22
   2   7   9  181.52   23.66
   2  -7   9  164.56   27.22
   2   8  -9  157.32   20.83
  -2  -8   9  161.82   13.66
  -2   8   8   53.05   14.79
  -2   8   8   35.81    6.93
   2   8  -8   40.26   12.89
  -2  -8   8   69.37   19.97
  -2  -8   8   36.08    6.94
  -2   8   7   27.73   12.85
   2   8  -7   30.21   11.73
  -2  -8   7   19.57   16.02
  -2  -8   7   43.16    7.09
   2   8  -6  321.42   25.68
  -2   8   6  265.23   26.66
  -2  -8   6  312.61   19.71
  -2  -8   6  278.01   29.10
  -2   8   5    3.03   10.36
   2   8  -5    8.50    9.24
  -2  -8   5   18.00    5.11
  -2   8   4  161.14   19.02
   2   8  -4  152.36   15.56
  -2  -8   4  148.79   11.72
  -2   8   3   99.66   16.12
  -2  -8   3  119.37   10.02
  -2   8   2  393.61   32.73
  -2  -8   2  422.44   24.52
   2   8  -1   98.37   17.39
  -2   8   1   87.51   13.79
  -2   8   1   82.88   14.93
  -2  -8   1   91.78    8.68
   2   8   0 1402.08   79.44
  -2   8   0 1472.70   76.99
   2  -8   0 1303.93   73.22
  -2  -8   0 1334.56   68.83
   2  -8   1   21.87    8.78
  -2  -8  -1   32.54    5.41
   2   8   2   69.72   15.72
   2   8   2   71.16   14.97
   2  -8   2   69.63   11.99
   2  -8   2   74.23    6.99
   2   8   3  600.90   45.58
   2   8   3  651.75   45.53
   2  -8   3  680.27   43.10
   2  -8   3  657.49   34.91
   2   8   4  914.51   63.12
   2   8   4  987.47   63.08
   2  -8   4 1046.92   52.99
   2  -8   4 1091.21   63.00
   2   8   5   84.60   16.29
  -2   8  -5   90.76   13.69
   2  -8   5   97.46   17.04
   2  -8   5   76.19    7.36
  -2   8  -6  232.63   21.58
   2   8   6  184.20   23.02
   2  -8   6  203.38   13.57
   2  -8   6  205.27   23.79
   2   8   7   30.65   13.77
  -2   8  -7   12.43   11.34
   2  -8   7    1.82   14.29
  -2   8  -8   10.58   12.47
   2   8   8   -7.62   12.23
   2  -8   8    1.99   15.51
  -2   8  -9   42.74   15.76
  -2  -9   8  104.12   10.95
  -2   9   7  209.66   26.13
  -2  -9   7  299.86   19.66
  -2   9   6  366.02   33.68
  -2  -9   6  455.86   37.63
  -2  -9   6  430.13   25.85
  -2   9   5   34.20   13.01
  -2  -9   5   45.46    7.14
  -2  -9   5   47.74   14.48
  -2   9   4  158.51   20.87
  -2  -9   4  166.38   13.13
  -2  -9   4  184.03   21.61
  -2   9   3   18.96   11.30
  -2  -9   3    9.05    9.79
  -2  -9   3    6.46    4.51
   2   9  -2   -1.95   13.53
  -2   9   2   12.55   12.11
  -2  -9   2   16.77   10.75
  -2  -9   2    5.42    4.57
  -2   9   1   20.89   11.53
   2   9  -1    1.86   13.89
  -2  -9   1   17.16    9.29
  -2  -9   1   16.39    5.22
   2   9   0  157.07   22.15
  -2  -9   0  167.35   13.37
   2  -9   0  198.73   18.36
  -2  -9   0  174.19   18.90
   2   9   1   10.64   12.89
   2   9   1   -6.45   14.10
   2  -9   1    9.37    8.80
   2   9   2  697.01   46.29
   2   9   2  567.86   45.95
   2  -9   2  646.68   40.69
   2  -9   2  592.21   33.13
   2   9   3   77.14   18.05
   2  -9   3   64.61   13.02
   2   9   4  107.62   18.93
   2  -9   4  125.72   18.02
   2  -9   4  117.51    9.66
   2  -9   5  224.03   24.00
   2  -9   5  186.99   13.05
   2   9   6  333.93   32.69
   2  -9   6  362.86   32.80
   2  -9   7    3.85   15.55
  -2 -10   6   33.86    6.85
  -2  10   5    1.90   12.35
  -2 -10   5    1.23    5.27
  -2  10   4    1.91   11.58
  -2 -10   4   -8.75   13.34
  -2 -10   4    1.81    5.35
   2  10  -3   38.74   18.31
  -2  10   3    9.63   11.56
  -2 -10   3   19.46    6.20
  -2 -10   3    9.80   11.49
  -2  10   2  164.63   23.68
   2  10  -2  239.12   28.80
  -2 -10   2  212.62   15.90
  -2 -10   2  229.54   23.56
   2  10  -1   33.36   17.05
  -2  10   1   29.75   14.31
  -2 -10   1   34.06    7.11
  -2 -10   1   42.50   12.43
   2  10   0  348.70   32.71
   2 -10   0  310.80   26.14
  -2 -10   0  317.40   20.93
  -2 -10   0  320.43   27.74
   2  10   1   21.58   16.22
   2 -10   1   17.01    9.86
   2  10   2   64.46   19.75
   2 -10   2   70.12   14.38
   2  10   3    8.78   14.85
   2 -10   3   17.18    5.16
   2 -10   3   10.22   10.36
   2 -10   4   93.55   16.95
   2 -10   5   20.97   13.47
  -2 -11   3   -0.68    5.81
  -2 -11   2   -0.68    5.41
  -2 -11   1   18.67    6.73
  -3   0  13   -0.62    5.66
   3   0 -13   -2.72   11.13
   3   0 -12    1.26    8.98
  -3   0  12    0.57    4.77
  -3   0  11    6.20    4.45
  -3   0  11    4.15   15.69
  -3   0  11   -1.78    6.83
   3   0 -11   -3.49    8.15
  -3   0  10  486.58   38.39
  -3   0  10  461.46   26.37
   3   0 -10  452.15   31.44
  -3   0  10  450.68   29.46
   3   0  -9   -0.95    6.91
  -3   0   9   -1.64   11.17
  -3   0   9   -2.22    6.10
  -3   0   9   -2.52    3.53
  -3   0   8  539.28   29.19
   3   0  -8  569.66   33.89
   3   0  -8  574.19   33.73
  -3   0   8  502.47   31.34
  -3   0   8  527.24   37.96
  -3   0   7    0.56    4.94
  -3   0   7    2.39    7.00
   3   0  -7    5.23    5.61
   3   0  -7   -2.60    3.36
   3   0  -7   -4.07    7.99
  -3   0   7    3.68    8.12
   3   0  -7    0.71    6.75
  -3   0   6  614.61   35.19
   3   0  -6  723.14   39.87
   3   0  -6  609.99   36.70
   3   0  -6  670.02   33.74
  -3   0   6  671.61   37.59
  -3   0   6  679.85   40.63
   3   0  -6  667.47   36.79
   3   0  -5   -0.46    2.28
  -3   0   5   -0.84    6.37
  -3   0   5   -0.48    1.97
  -3   0   5    1.10    5.64
   3   0  -5    1.44    4.90
   3   0  -5    2.93    6.31
  -3   0   5    1.52    3.36
   3   0  -5    3.22    4.66
   3   0  -4 1986.57   92.93
   3   0  -4 1994.68   96.77
  -3   0   4 2030.77   97.96
  -3   0   4 1928.72   95.44
   3   0  -4 1862.81   94.35
  -3   0   4 1971.92   93.01
  -3   0   4 1871.82   93.71
   3   0  -4 1663.63   94.69
  -3   0   3    1.76    4.53
  -3   0   3    2.55    5.18
   3   0  -3   -0.47    2.92
  -3   0   3    0.65    1.75
   3   0  -3    2.30    4.33
   3   0  -3   -0.76    1.95
  -3   0   2  572.09   31.45
  -3   0   2  643.52   32.58
   3   0  -2  643.43   30.40
   3   0  -2  604.36   30.15
  -3   0   2  652.53   30.28
  -3   0   1    1.28    3.36
   3   0  -1   -0.35    2.28
  -3   0   1    1.64    1.29
  -3   0   1    0.37    3.01
  -3   0   0  755.25   36.71
  -3   0   0  768.56   38.72
  -3   0   0  731.15   37.20
   3   0   0  781.65   37.13
   3   0   1   -0.35    1.05
   3   0   1   -4.13    3.24
  -3   0  -1   -1.88    2.87
  -3   0  -1   -0.65    1.37
   3   0   1    0.46    0.91
  -3   0  -1   -0.64    0.85
  -3   0  -1   -3.07    4.42
  -3   0  -2 2330.62  109.22
  -3   0  -2 2257.88  111.12
   3   0   2 2103.66  111.11
   3   0   2 2271.88  108.83
   3   0   2 2272.21  109.21
   3   0   2 2278.66  111.95
  -3   0  -2 2337.52  112.16
  -3   0  -3    4.53    5.71
   3   0   3    0.98    4.95
  -3   0  -3    1.29    4.92
   3   0   3    1.61    1.41
   3   0   3   -2.41    4.59
  -3   0  -4  619.36   34.97
   3   0   4  599.41   34.56
   3   0   4  604.47   30.59
   3   0   4  620.16   30.22
  -3   0  -4  671.87   34.92
  -3   0  -5    1.42    2.10
  -3   0  -5   -4.99    7.01
   3   0   5    0.68    1.56
   3   0   5   -8.48    5.47
   3   0   5   -2.09    4.41
   3   0   6   12.96    6.39
  -3   0  -6   17.98    7.71
   3   0   6   15.12    2.55
   3   0   6    0.77    3.17
  -3   0  -6   12.46    2.83
   3   0   7   -1.82    5.50
   3   0   7   -1.46    2.10
   3   0   7   -3.71    6.01
  -3   0  -7    0.83    2.58
   3   0   8  180.83   19.21
   3   0   8  222.87   13.22
   3   0   8  228.70   19.34
  -3   0  -8  204.04   18.29
  -3   0  -9    1.08    7.78
   3   0   9    2.97   10.04
   3   0   9    0.33    2.84
   3   0   9    3.39    8.00
  -3   0 -10  228.40   21.10
   3   0  10  223.40   21.36
   3   0  10  241.39   25.83
   3   0  10  249.50   15.14
   3   0  11   -3.87    9.05
  -3   0 -11    2.55    9.17
   3   0  11    0.41    3.31
   3   0  11    2.07   13.98
  -3   0 -12   72.81   13.75
   3   0  12   65.52   13.91
   3   0  12   73.29    7.58
   3   0  12   67.21   20.85
  -3   0 -13    4.43    9.78
   3   0  13   -2.89   10.31
   3   0  13   -2.55    4.60
   3  -1 -14  225.61   22.27
  -3   1  13   49.12    8.06
   3   1 -13   78.19   15.02
   3  -1 -13   63.01   12.91
  -3  -1  13   47.78    7.99
  -3   1  12   -8.98   16.18
   3   1 -12   12.16   10.55
  -3   1  12   12.49    5.17
  -3  -1  12    4.72   15.93
  -3  -1  12    9.26    5.63
   3  -1 -12   13.97   10.04
  -3  -1  12    4.94    8.32
   3   1 -11    6.23    8.98
  -3   1  11   -2.00   14.69
  -3   1  11    6.04    7.52
  -3   1  11   -3.07    4.75
  -3  -1  11    8.54   15.78
  -3  -1  11    3.65    4.15
  -3  -1  11    5.50    6.43
   3  -1 -11    3.21    8.54
   3   1 -10  160.85   17.04
  -3   1  10  135.71   20.37
  -3   1  10  172.62   15.24
  -3   1  10  160.55   12.32
  -3  -1  10  192.82   16.39
  -3  -1  10  161.16   22.88
  -3  -1  10  196.43   13.21
   3  -1 -10  172.02   16.54
   3   1  -9  390.62   27.40
  -3   1   9  373.33   29.90
  -3   1   9  372.92   21.78
  -3   1   9  336.44   23.91
   3  -1  -9  372.03   25.77
  -3  -1   9  372.17   21.96
   3  -1  -9  420.32   27.15
  -3  -1   9  435.74   34.01
  -3  -1   9  397.24   25.12
  -3   1   8    6.92    8.02
   3   1  -8   -0.93    7.02
  -3   1   8    3.08    4.80
   3  -1  -8   -0.77    5.64
  -3  -1   8    3.41    5.16
  -3  -1   8   -1.50    9.65
  -3  -1   8    2.29    2.85
   3  -1  -8    5.45    7.29
   3   1  -7  211.33   16.87
   3   1  -7  196.60   16.73
  -3   1   7  187.24   14.13
   3   1  -7  217.64   12.73
  -3  -1   7  212.36   17.84
  -3  -1   7  207.15   12.87
   3  -1  -7  216.45   18.20
  -3  -1   7  190.68   14.77
   3  -1  -7  218.54   15.93
   3  -1  -7  219.12   15.97
  -3  -1   7  191.21   20.46
  -3   1   6  401.49   23.24
   3   1  -6  403.98   26.46
  -3   1   6  392.16   24.47
  -3   1   6  440.76   26.76
   3   1  -6  423.24   23.15
   3  -1  -6  468.11   28.63
   3  -1  -6  430.43   25.81
  -3  -1   6  410.81   25.14
  -3  -1   6  422.63   27.40
  -3  -1   6  385.20   29.87
   3  -1  -6  478.92   26.30
   3  -1  -6  402.00   23.41
  -3   1   5    6.69    5.18
  -3   1   5    5.41    5.28
   3   1  -5    0.90    2.21
  -3   1   5    2.07    3.13
   3   1  -5   -1.52    4.45
  -3   1   5    0.49    1.85
  -3  -1   5   -4.71    7.07
  -3  -1   5   -0.83    3.28
   3  -1  -5    1.54    2.71
   3  -1  -5   -1.34    6.13
   3  -1  -5   -3.23    3.73
   3  -1  -5    0.43    4.22
  -3  -1   5   -1.84    5.89
  -3   1   4 1725.62   90.74
   3   1  -4 1893.81   92.29
  -3   1   4 1788.45   93.73
   3   1  -4 1857.25   90.29
   3   1  -4 1735.36   93.02
  -3   1   4 1896.65   90.49
  -3   1   4 1878.96   92.21
   3  -1  -4 1743.68   91.74
  -3  -1   4 1824.85   90.53
   3  -1  -4 1982.11   90.74
  -3  -1   4 1937.88   96.11
   3  -1  -4 2002.81   91.65
   3  -1  -4 2033.82   94.10
  -3  -1   4 1857.27   93.44
  -3   1   3 7610.40  377.45
   3   1  -3 7880.34  380.03
  -3   1   3 8321.12  380.58
   3   1  -3 7764.93  377.61
   3   1  -3 7527.68  378.64
  -3   1   3 8045.12  378.95
  -3   1   3 7846.58  377.61
  -3  -1   3 8141.80  382.16
  -3  -1   3 8073.25  380.15
   3  -1  -3 7940.89  377.93
   3  -1  -3 7835.78  378.66
   3  -1  -3 8096.25  377.77
   3  -1  -3 8605.25  380.19
  -3  -1   3 8000.47  377.91
   3   1  -224394.30 1143.63
  -3   1   224089.10 1143.36
  -3   1   223655.30 1142.42
   3   1  -223241.70 1141.77
  -3   1   223986.90 1141.70
   3  -1  -225317.10 1143.15
   3  -1  -223764.40 1142.33
  -3  -1   223802.10 1143.51
  -3  -1   224435.30 1142.02
  -3  -1   224080.00 1144.76
   3   1  -1 2585.67  124.53
  -3   1   1 2707.42  122.99
  -3   1   1 2370.31  123.46
  -3   1   1 2515.63  123.43
   3   1  -1 2565.80  123.23
  -3  -1   1 2495.87  123.39
   3  -1  -1 2652.80  123.59
  -3  -1   1 2614.22  124.50
  -3  -1   1 2585.49  125.02
   3   1   0 8716.40  400.74
  -3   1   0 8499.77  400.06
  -3   1   0 8156.09  400.87
   3   1   0 8824.99  403.21
  -3   1   0 8442.93  399.65
  -3  -1   0 8452.34  401.13
   3  -1   0 8065.99  400.78
  -3  -1   0 8836.92  402.80
   3  -1   0 8205.51  399.66
  -3  -1   0 8511.37  400.27
  -3  -1   0 8391.42  400.91
   3   1   1  881.03   43.19
  -3   1  -1  844.35   41.44
  -3   1  -1  774.16   40.46
  -3   1  -1  789.08   39.44
   3   1   1  812.73   39.62
   3  -1   1  781.66   39.54
  -3  -1  -1  836.65   43.35
  -3  -1  -1  847.23   39.62
   3  -1   1  857.99   40.84
  -3   1  -2  578.75   26.82
   3   1   2  506.68   26.57
   3   1   2  513.10   29.74
  -3   1  -2  577.71   29.72
  -3   1  -2  452.84   28.02
   3   1   2  572.67   26.65
   3  -1   2  527.25   29.40
  -3  -1  -2  511.23   29.36
   3  -1   2  513.71   26.71
  -3  -1  -2  566.58   30.93
  -3   1  -3   50.25    7.20
   3   1   3   37.28    3.09
  -3   1  -3   41.46    3.48
  -3   1  -3   40.10    7.45
   3   1   3   44.62    7.13
   3   1   3   38.81    3.43
   3  -1   3   33.02    3.24
   3  -1   3   29.32    6.30
  -3  -1  -3   51.03    7.78
  -3  -1  -3   47.98    3.32
  -3  -1  -3   53.82    7.45
   3  -1   3   45.12    6.64
  -3   1  -4 2136.85  106.43
   3   1   4 2057.32  110.11
  -3   1  -4 2230.68  110.79
  -3   1  -4 2306.03  111.15
   3   1   4 2057.33  106.11
  -3  -1  -4 2209.49  110.53
   3  -1   4 2135.68  111.35
   3  -1   4 2072.86  110.21
   3  -1   4 2171.72  105.68
  -3   1  -5  167.11    9.96
   3   1   5  158.38    9.67
  -3   1  -5  208.90   16.38
  -3   1  -5  160.02   14.49
   3   1   5  170.80   13.96
   3   1   5  148.09    9.48
  -3  -1  -5  181.55   14.96
   3  -1   5  161.70    9.15
  -3  -1  -5  186.81    9.87
   3  -1   5  167.87   15.57
   3  -1   5  161.29   14.07
  -3   1  -6 4199.33  205.66
  -3   1  -6 4596.67  206.99
   3   1   6 4045.38  199.66
   3   1   6 3928.93  204.60
  -3  -1  -6 4337.72  199.47
   3  -1   6 4135.24  207.42
  -3  -1  -6 4465.14  206.09
  -3  -1  -6 4394.62  206.05
   3  -1   6 4061.97  198.97
   3  -1   6 3842.78  204.64
   3   1   7  144.05   14.58
   3   1   7  157.61   10.31
   3  -1   7  161.42   15.09
   3  -1   7  168.13    9.97
  -3  -1  -7  161.88   10.15
   3  -1   7  153.71   17.62
   3   1   8   91.63   13.03
  -3   1  -8   98.87   12.97
   3   1   8  105.46    8.11
   3  -1   8  103.29   12.83
   3  -1   8  120.46    7.92
   3  -1   8  110.64   17.11
   3   1   9   94.12    7.53
   3   1   9  103.03   13.66
  -3   1  -9   80.64   12.32
   3  -1   9   98.26   16.76
  -3  -1  -9   83.23   12.09
   3  -1   9   93.57    7.33
   3  -1   9   73.10   12.05
   3   1  10 1292.16   65.72
  -3   1 -10 1252.24   73.06
   3   1  10 1230.72   72.93
   3  -1  10 1372.26   80.25
   3  -1  10 1214.80   72.26
  -3  -1 -10 1213.50   71.74
   3  -1  10 1363.11   65.57
   3   1  11   65.90    6.85
   3   1  11   52.21   15.63
   3   1  11   76.99   13.69
  -3   1 -11   59.02   13.35
  -3  -1 -11   53.97   12.18
   3  -1  11   65.18    6.68
   3  -1  11   61.62   12.58
   3  -1  11   46.91   18.41
   3   1  12   36.43   16.01
  -3   1 -12   28.91   11.59
   3   1  12   22.35    4.95
   3   1  12   34.43   11.94
   3  -1  12   30.64   18.96
  -3  -1 -12   27.23   10.84
   3  -1  12   28.90    5.37
   3  -1  12   26.05   11.81
   3   1  13   20.20    5.13
   3   1  13   23.10   12.41
  -3  -1 -13   32.14   11.65
   3   1  14    3.97    5.45
  -3  -2  13    1.09    8.96
  -3  -2  13    1.96    5.49
   3  -2 -13    6.90    8.90
   3   2 -12    1.43   10.39
  -3   2  12    2.12   15.52
  -3   2  12   -1.70    5.11
   3  -2 -12   -2.12    8.40
  -3  -2  12  -17.07   19.44
  -3  -2  12    5.95    4.94
  -3  -2  12    9.19    8.75
  -3   2  11   45.18   13.57
  -3   2  11   57.45    7.05
   3   2 -11   30.64   10.29
   3  -2 -11   46.70   10.48
  -3  -2  11   49.90    7.10
  -3  -2  11   62.16   19.17
  -3  -2  11   43.76    9.66
   3   2 -10  574.52   38.54
  -3   2  10  569.04   32.26
  -3   2  10  468.01   37.78
  -3  -2  10  612.63   32.87
  -3  -2  10  603.46   36.08
   3  -2 -10  594.93   36.12
  -3  -2  10  553.90   44.88
   3   2  -9  130.10   15.61
  -3   2   9  117.59   12.64
   3  -2  -9  156.42   15.59
  -3  -2   9  104.45   19.59
   3  -2  -9  119.70   13.13
  -3  -2   9  127.83   11.04
  -3  -2   9  149.96   14.04
  -3   2   8   83.43    9.12
  -3   2   8   58.40   11.29
   3  -2  -8   80.68    9.77
  -3  -2   8   81.05    7.48
  -3  -2   8  105.71   16.62
  -3  -2   8   76.85    9.54
   3  -2  -8   81.44   10.78
  -3   2   7 1000.55   52.06
   3   2  -7 1028.15   56.80
  -3   2   7  973.79   57.99
  -3   2   7  942.00   53.45
   3   2  -7 1012.63   51.84
  -3  -2   7 1059.87   54.92
  -3  -2   7 1093.38   52.59
   3  -2  -7 1020.93   54.36
  -3  -2   7 1054.33   62.01
   3  -2  -7 1114.49   55.42
  -3   2   6  118.50    8.54
  -3   2   6  133.12   13.80
   3   2  -6  112.40    8.30
   3   2  -6  146.34   12.90
  -3   2   6  116.88    9.67
   3   2  -6  115.64   11.73
   3  -2  -6  126.41   10.76
   3  -2  -6  142.51   13.46
  -3  -2   6  124.53   10.63
  -3  -2   6  121.14    8.74
   3  -2  -6  129.58   10.33
  -3  -2   6  133.13   16.14
  -3  -2   6  119.99   12.99
  -3   2   5  308.58   17.66
  -3   2   5  350.80   22.73
   3   2  -5  310.31   17.50
  -3   2   5  302.20   18.33
  -3   2   5  333.43   19.54
   3   2  -5  303.20   21.31
   3   2  -5  332.69   20.72
   3  -2  -5  350.04   19.31
   3  -2  -5  373.92   22.56
  -3  -2   5  303.18   21.24
   3  -2  -5  326.16   18.95
  -3  -2   5  363.52   25.57
  -3   2   4  584.20   29.53
   3   2  -4  558.67   29.34
  -3   2   4  559.07   30.37
  -3   2   4  605.79   33.29
   3   2  -4  616.57   33.08
  -3   2   4  573.37   29.64
   3  -2  -4  575.52   30.02
   3  -2  -4  565.18   30.09
  -3  -2   4  517.04   32.40
  -3  -2   4  586.95   35.82
   3  -2  -4  608.75   33.24
  -3   2   3 2858.55  134.39
  -3   2   3 2854.92  132.10
   3   2  -3 2840.74  134.55
  -3   2   3 2579.64  131.07
  -3   2   3 2729.17  131.62
   3   2  -3 2748.36  131.67
   3  -2  -3 2738.42  131.68
  -3  -2   3 2593.83  131.85
   3  -2  -3 2856.09  134.60
   3  -2  -3 2783.94  131.68
  -3  -2   3 2773.90  134.56
  -3  -2   3 2889.56  137.08
  -3   2   2  139.58    8.25
   3   2  -2  132.21    8.46
  -3   2   2  138.19    8.36
   3   2  -2  138.66   10.34
  -3   2   2  155.47   10.28
  -3  -2   2  147.02    8.83
   3  -2  -2  141.85   10.88
  -3  -2   2  151.32   12.60
   3  -2  -2  142.96    7.84
   3   2  -1  553.58   26.89
  -3   2   1  500.09   26.65
  -3   2   1  473.20   24.69
   3   2  -1  526.96   25.47
  -3   2   1  498.37   25.80
  -3   2   1  486.40   24.76
   3  -2  -1  519.26   24.45
  -3  -2   1  470.05   25.38
  -3  -2   1  521.70   28.07
   3   2   0 4407.56  224.91
  -3   2   0 4589.28  220.35
   3   2   0 4671.82  221.05
   3   2   0 4664.86  221.64
  -3   2   0 4628.13  221.55
  -3   2   0 4742.20  221.92
  -3  -2   0 4449.52  221.16
   3  -2   0 4809.20  220.40
   3  -2   0 4625.18  221.28
  -3  -2   0 4480.16  222.76
   3  -2   0 4394.15  221.44
   3   2   1 1347.03   66.34
  -3   2  -1 1434.01   68.21
  -3   2  -1 1427.59   68.55
  -3   2  -1 1336.97   65.51
   3   2   1 1464.33   71.05
   3  -2   1 1284.77   66.05
   3  -2   1 1326.34   67.89
   3  -2   1 1293.84   67.60
  -3  -2  -1 1281.00   70.28
  -3  -2  -1 1330.52   66.47
  -3  -2  -1 1337.60   66.74
  -3   2  -2  473.23   25.81
  -3   2  -2  521.68   26.77
   3   2   2  477.81   27.54
  -3   2  -2  477.99   22.71
   3   2   2  465.30   22.42
  -3   2  -2  426.25   21.83
  -3  -2  -2  480.21   27.45
  -3  -2  -2  454.46   23.03
  -3  -2  -2  444.70   22.74
   3  -2   2  484.55   26.26
   3   2   3  320.37   17.74
  -3   2  -3  367.61   17.72
   3   2   3  321.31   17.13
   3   2   3  326.48   21.38
  -3   2  -3  359.18   22.25
  -3   2  -3  337.52   16.63
  -3   2  -3  343.35   21.24
   3  -2   3  359.62   22.08
  -3  -2  -3  347.95   22.45
  -3  -2  -3  333.20   17.20
  -3   2  -4   42.24    4.00
  -3   2  -4   44.03    7.97
  -3   2  -4   46.79    3.13
   3   2   4   35.81    7.25
   3   2   4   37.88    3.29
  -3   2  -4   29.83    7.24
   3   2   4   40.38    4.15
  -3  -2  -4   38.62    3.36
  -3  -2  -4   51.44    8.86
  -3  -2  -4   29.99    8.76
   3  -2   4   40.87    3.19
   3  -2   4   27.37    6.39
   3  -2   4   35.85    8.24
  -3   2  -5 1155.75   56.14
  -3   2  -5 1180.30   61.38
   3   2   5 1075.76   60.39
   3   2   5 1071.06   55.40
  -3   2  -5  964.33   59.65
  -3   2  -5 1180.92   55.16
   3  -2   5 1092.37   55.16
  -3  -2  -5 1224.81   62.40
  -3  -2  -5 1207.77   55.55
   3  -2   5 1162.76   63.12
  -3  -2  -5 1152.32   62.13
   3  -2   5 1031.86   59.88
  -3   2  -6   11.95    7.69
   3   2   6    6.48    5.90
  -3   2  -6    7.46    2.81
  -3   2  -6   11.96    7.94
  -3   2  -6    8.44    2.41
   3  -2   6    8.10    2.12
  -3  -2  -6   23.26    8.36
   3  -2   6   11.58    9.30
   3  -2   6    7.28    5.42
  -3  -2  -6    9.57    7.80
  -3  -2  -6    8.84    2.51
  -3   2  -7  870.34   53.02
  -3   2  -7  921.54   46.71
   3   2   7  876.18   47.41
   3   2   7  883.68   52.65
   3  -2   7  778.36   51.68
   3  -2   7  893.03   56.31
   3  -2   7  896.67   46.56
  -3   2  -8   19.70    8.50
   3   2   8   11.38    3.23
   3   2   8    7.14    7.26
   3  -2   8   15.95    3.26
   3  -2   8   24.71   11.98
   3  -2   8   20.28    8.55
   3   2   9   48.77    5.58
   3   2   9   51.76   10.61
   3  -2   9   36.90    4.76
   3  -2   9   38.84    9.99
  -3  -2  -9   33.20    8.74
   3  -2   9   19.26   14.57
   3   2  10  139.54   10.49
   3   2  10  160.70   17.06
  -3   2 -10  106.61   16.08
   3  -2  10  129.83   22.58
   3  -2  10  138.99    9.94
  -3  -2 -10  136.07   15.18
   3  -2  10  118.13   15.48
   3   2  11  122.25   16.96
   3   2  11  106.96    9.40
  -3   2 -11  116.59   16.09
  -3  -2 -11  110.41   14.61
   3  -2  11  137.90   24.04
   3  -2  11  116.84    9.22
   3  -2  11  131.56   16.22
   3   2  12    2.01    4.49
   3   2  12   -1.40   11.27
  -3   2 -12    1.52   10.77
   3  -2  12    2.73   10.50
   3  -2  12  -12.08   16.79
   3  -2  12    2.26    4.11
  -3  -2 -12    7.32    8.32
   3   2  13    6.54    4.51
   3   2  13   18.88   13.40
  -3  -2 -13    9.17    9.20
  -3  -3  13  110.11   11.85
   3   3 -12   -6.08   11.86
  -3   3  12    2.95    4.96
  -3   3  12   -3.51   11.96
  -3  -3  12    3.10    6.18
  -3  -3  12   10.02   20.11
  -3   3  11  444.85   27.91
   3   3 -11  431.97   34.79
  -3  -3  11  474.71   42.42
   3  -3 -11  466.07   30.89
  -3  -3  11  470.51   28.59
  -3   3  10 1014.51   68.32
  -3  -3  10 1167.75   76.23
   3  -3 -10 1217.84   64.39
  -3  -3  10 1235.16   62.35
   3   3  -9  234.41   22.08
  -3   3   9  279.81   24.18
  -3  -3   9  271.13   28.99
  -3  -3   9  254.19   17.23
   3  -3  -9  279.48   15.40
   3  -3  -9  254.55   18.82
   3  -3  -9  258.36   21.10
  -3   3   8    1.24    3.16
   3   3  -8    4.31    7.90
  -3   3   8   13.05    8.99
  -3   3   8    4.78    5.87
  -3  -3   8    5.06   12.96
   3  -3  -8    2.38    7.37
  -3  -3   8    3.01    3.99
   3  -3  -8    2.15    2.61
   3  -3  -8    0.58    5.27
   3   3  -7  925.15   51.68
  -3   3   7  840.70   47.42
  -3   3   7  857.53   46.08
  -3   3   7  929.82   53.36
   3  -3  -7  897.82   47.36
   3  -3  -7  945.23   49.53
  -3  -3   7 1034.05   58.01
  -3  -3   7  932.84   46.64
  -3   3   6  160.37   16.10
   3   3  -6  175.16   11.32
  -3   3   6  177.72   11.54
   3   3  -6  175.20   15.81
   3   3  -6  183.26   15.41
  -3   3   6  165.56   12.38
   3  -3  -6  180.23   13.95
   3  -3  -6  176.11   16.97
  -3  -3   6  160.75   19.02
   3  -3  -6  183.59   12.25
  -3  -3   6  195.53   12.17
  -3   3   5  269.75   16.01
   3   3  -5  248.89   22.36
  -3   3   5  279.18   16.47
   3   3  -5  275.29   15.79
  -3   3   5  279.49   20.19
   3   3  -5  300.10   20.22
  -3  -3   5  253.23   19.70
   3  -3  -5  281.67   16.09
  -3  -3   5  254.78   23.21
  -3  -3   5  292.17   16.61
   3  -3  -5  294.93   18.20
   3  -3  -5  265.39   20.59
  -3   3   4 2457.43  117.62
   3   3  -4 2319.93  121.22
  -3   3   4 2411.16  117.42
  -3   3   4 2436.82  121.39
   3   3  -4 2201.79  123.12
   3   3  -4 2448.34  117.44
  -3   3   4 2574.47  117.54
   3  -3  -4 2569.81  118.49
  -3  -3   4 2474.77  125.23
  -3  -3   4 2180.38  117.61
   3  -3  -4 2536.12  122.25
   3   3  -3 3224.97  155.75
  -3   3   3 3058.05  152.21
   3   3  -3 3231.00  154.43
   3   3  -3 3003.83  157.67
  -3   3   3 3314.30  151.90
  -3   3   3 3189.32  152.57
  -3   3   3 3115.93  155.55
   3   3  -3 3012.32  152.45
   3  -3  -3 3239.46  156.91
  -3  -3   3 3220.02  158.44
  -3   3   2  122.57    9.82
   3   3  -2  135.86   10.51
  -3   3   2  143.28    8.93
  -3   3   2  140.35    7.61
   3   3  -2  127.94   13.78
  -3   3   2  136.71   10.89
   3   3  -2  122.61    8.68
  -3  -3   2  142.89   11.40
  -3  -3   2  149.66   12.86
  -3   3   1 3239.00  160.96
   3   3  -1 2935.96  161.17
  -3   3   1 3366.93  159.60
  -3   3   1 3216.54  156.84
  -3   3   1 3356.66  157.75
   3   3  -1 3388.72  159.65
   3   3  -1 3341.80  158.12
  -3  -3   1 3267.10  158.30
  -3  -3   1 3395.72  159.79
  -3  -3   1 3436.80  161.79
   3   3   0  161.88   14.49
  -3   3   0  186.14    9.72
   3   3   0  165.01   10.33
  -3   3   0  183.95   12.40
   3   3   0  154.61   13.15
  -3   3   0  174.55    9.26
  -3   3   0  166.98   11.02
   3   3   0  176.94   11.01
   3  -3   0  163.27   11.32
  -3  -3   0  186.06   11.62
  -3  -3   0  187.33   12.92
  -3  -3   0  190.63   10.60
   3  -3   0  180.46    9.38
   3   3   1  119.91    7.03
  -3   3  -1  110.58    6.33
   3   3   1  105.36   11.38
  -3   3  -1  113.00    8.91
  -3   3  -1  108.55   10.41
   3   3   1  110.40    7.34
   3   3   1  116.44    9.98
  -3   3  -1  113.64    6.42
  -3  -3  -1  102.54    9.02
  -3  -3  -1  114.63    7.28
  -3  -3  -1  111.74    7.86
   3  -3   1  106.82    6.30
   3  -3   1  102.02    8.90
   3  -3   1  102.48    8.10
   3   3   2   42.42    8.08
   3   3   2   31.80    3.68
   3   3   2   17.72    5.44
  -3   3  -2   35.56    3.11
  -3   3  -2   36.73    6.71
  -3   3  -2   34.45    8.26
   3   3   2   29.74    2.62
   3   3   2   36.45    8.18
  -3   3  -2   31.65    2.80
   3  -3   2   31.68    5.31
   3  -3   2   29.87    2.45
   3  -3   2   47.91    7.20
  -3  -3  -2   31.93    3.82
  -3  -3  -2   35.72    3.60
  -3   3  -3 1109.81   60.40
   3   3   3 1252.75   54.95
   3   3   3 1085.29   60.43
  -3   3  -3 1125.80   59.35
  -3   3  -3 1117.60   54.40
   3   3   3 1021.63   60.09
  -3   3  -3 1093.45   55.25
  -3  -3  -3 1077.02   54.99
   3  -3   3 1103.58   60.31
   3  -3   3 1119.14   54.50
   3  -3   3 1014.93   57.94
  -3  -3  -3 1093.76   60.76
  -3   3  -4 3349.10  155.77
  -3   3  -4 3273.87  154.64
   3   3   4 3120.72  156.01
   3   3   4 3077.85  160.27
   3   3   4 3101.05  154.77
  -3   3  -4 3356.22  160.76
   3   3   4 2888.07  160.47
  -3   3  -4 3414.42  162.04
  -3  -3  -4 3329.11  162.76
   3  -3   4 3261.28  161.90
  -3  -3  -4 3281.11  155.03
  -3  -3  -4 3410.03  162.74
   3  -3   4 3271.45  154.85
   3   3   5 1837.04   90.54
  -3   3  -5 1891.63   89.01
  -3   3  -5 1851.14   95.72
  -3   3  -5 1914.83   90.23
   3   3   5 1765.19   89.10
  -3   3  -5 1743.29   94.94
  -3   3  -5 1741.70   96.10
   3   3   5 1802.46   94.96
   3   3   5 1655.30   95.36
   3  -3   5 1846.77   89.21
  -3  -3  -5 1775.31   96.92
   3  -3   5 1788.67   97.29
  -3  -3  -5 1898.35   89.23
  -3  -3  -5 1972.26   98.03
   3   3   6  864.97   57.96
   3   3   6 1014.23   53.10
  -3   3  -6 1102.09   51.68
  -3   3  -6  755.57   55.74
  -3   3  -6  986.55   58.02
   3   3   6 1049.75   58.03
   3  -3   6  955.04   56.83
  -3  -3  -6 1084.81   51.72
  -3  -3  -6 1044.48   60.45
   3  -3   6 1060.78   61.45
   3  -3   6 1060.58   51.87
  -3   3  -7   92.81    6.42
  -3   3  -7   78.93   11.67
   3   3   7   73.79   10.97
   3  -3   7   72.88   15.06
   3  -3   7   80.02    6.38
  -3  -3  -7   88.41    6.28
   3  -3   7   96.42   11.72
   3   3   8   17.34    4.20
   3   3   8   28.59    9.12
  -3   3  -8   19.53    8.47
   3  -3   8   20.14    3.68
   3  -3   8   13.20    7.38
  -3  -3  -8   22.52    3.65
   3  -3   8   24.39   13.09
   3   3   9  116.72    9.80
  -3   3  -9  106.52   14.98
   3   3   9  121.19   15.20
   3  -3   9  132.31    9.23
   3  -3   9  157.34   22.27
  -3  -3  -9  112.93   13.11
   3  -3   9  123.55   14.48
  -3   3 -10  334.71   27.75
   3   3  10  368.52   27.81
   3   3  10  335.99   20.96
   3  -3  10  356.02   27.43
  -3  -3 -10  307.62   24.56
   3  -3  10  326.43   33.34
   3  -3  10  373.04   20.50
   3   3  11  869.03   52.80
   3   3  11  832.23   44.94
   3  -3  11  829.36   51.90
  -3  -3 -11  730.48   48.83
   3  -3  11  888.66   44.46
   3  -3  11  785.64   59.68
   3   3  12  355.69   29.54
   3   3  12  337.15   21.45
   3  -3  12  384.09   29.70
  -3  -3 -12  353.27   26.85
   3  -3  12  379.21   38.29
   3   3  13  101.67   10.15
  -3  -4  13   88.14   11.50
  -3   4  12    8.27    8.58
  -3  -4  12   10.28    7.36
  -3   4  11   14.97   12.50
   3   4 -11   20.91   10.80
  -3  -4  11   43.45    8.12
  -3  -4  11   26.04   20.23
   3   4 -10  239.52   23.57
  -3   4  10  218.31   25.00
  -3  -4  10  262.52   18.19
   3  -4 -10  282.45   18.93
  -3  -4  10  280.52   32.18
  -3   4   9   20.10   11.05
   3   4  -9   11.43    9.46
  -3   4   9    3.36    3.87
  -3  -4   9   11.87   16.21
  -3  -4   9   13.23    6.27
   3  -4  -9    5.65    5.19
  -3   4   8   -1.37    9.41
   3   4  -8   -3.47    8.26
  -3   4   8    5.75    3.32
   3  -4  -8    0.47    4.57
  -3  -4   8    3.59   14.90
   3  -4  -8   -5.37    9.01
   3  -4  -8    1.72    2.26
  -3  -4   8    0.47    5.28
   3   4  -7  132.14   14.50
  -3   4   7  102.94   14.25
  -3   4   7  104.99    8.80
  -3   4   7   95.12    9.82
   3  -4  -7  110.01    8.94
   3  -4  -7  125.08   12.98
  -3  -4   7  117.51    9.89
   3  -4  -7  118.37    6.98
  -3  -4   7  112.27   19.30
  -3   4   6  263.46   20.64
   3   4  -6  264.72   20.29
  -3   4   6  254.28   16.11
  -3   4   6  284.90   15.86
   3  -4  -6  289.20   18.15
  -3  -4   6  325.01   26.68
  -3  -4   6  294.61   16.32
   3  -4  -6  300.90   13.18
   3   4  -5  332.28   19.29
  -3   4   5  323.25   19.77
   3   4  -5  354.14   23.77
  -3   4   5  348.29   19.74
  -3   4   5  376.27   24.31
   3  -4  -5  343.71   17.19
  -3  -4   5  368.18   28.04
  -3  -4   5  353.85   24.41
   3  -4  -5  359.10   21.27
  -3  -4   5  370.39   20.31
   3  -4  -5  335.74   25.48
  -3   4   4  415.97   21.15
   3   4  -4  398.59   24.80
  -3   4   4  379.57   24.48
   3   4  -4  408.47   23.75
   3   4  -4  390.81   20.59
   3   4  -4  389.83   27.66
  -3  -4   4  386.80   21.07
  -3  -4   4  371.32   27.51
   3  -4  -4  395.24   26.97
   3  -4  -4  367.85   18.28
  -3  -4   4  406.58   24.84
  -3   4   3    7.51    3.30
   3   4  -3    5.45    4.63
   3   4  -3    4.86    4.45
   3   4  -3    8.96    3.38
  -3   4   3   15.43    4.98
   3   4  -3    8.32   10.28
  -3   4   3    9.42    4.66
  -3  -4   3    6.61    5.49
  -3  -4   3    5.76    2.83
  -3  -4   3   12.78    7.59
  -3   4   2  978.06   47.75
   3   4  -2  990.28   50.43
   3   4  -2  954.53   53.54
  -3   4   2  903.85   51.46
  -3   4   2  955.62   49.12
  -3   4   2  895.73   49.91
   3   4  -2  946.78   47.98
  -3  -4   2  977.02   53.18
  -3  -4   2  960.26   50.57
  -3   4   1 1986.64   98.28
   3   4  -1 1916.42   98.70
  -3   4   1 2021.82   98.67
  -3   4   1 2029.89   96.99
   3   4  -1 1990.49  103.18
   3   4  -1 2104.76  100.53
  -3   4   1 2090.45  101.56
   3  -4  -1 2088.99  100.50
  -3  -4   1 2211.25  103.69
  -3  -4   1 2038.64  100.63
  -3   4   0 1111.12   61.71
  -3   4   0 1159.32   59.81
   3   4   0 1092.16   59.00
   3   4   0 1141.54   59.51
  -3   4   0 1341.29   57.78
  -3   4   0 1146.78   58.29
   3   4   0 1019.61   62.31
   3   4   0 1264.99   65.43
  -3  -4   0 1129.11   62.24
  -3  -4   0 1158.61   60.05
   3  -4   0 1168.01   60.82
  -3  -4   0 1148.09   59.14
  -3   4  -1  296.88   15.74
  -3   4  -1  317.70   18.42
   3   4   1  307.53   16.84
   3   4   1  289.34   16.12
   3   4   1  292.15   19.99
  -3   4  -1  299.69   20.72
  -3   4  -1  298.50   15.40
   3   4   1  310.24   22.09
  -3  -4  -1  308.89   17.25
   3  -4   1  328.11   19.72
  -3  -4  -1  313.40   16.80
   3  -4   1  285.28   15.72
  -3  -4  -1  281.81   19.34
  -3   4  -2   30.79    6.49
  -3   4  -2   35.08   10.20
   3   4   2   32.88    8.54
   3   4   2   24.00    3.80
   3   4   2   37.40    6.78
  -3   4  -2   28.40    3.07
   3   4   2   27.09    2.59
   3   4   2   24.39    8.21
  -3   4  -2   34.30    3.17
  -3  -4  -2   28.98    4.17
  -3  -4  -2   39.85    8.27
   3  -4   2   30.84    2.79
  -3  -4  -2   24.90    3.63
   3  -4   2   22.38    6.40
   3  -4   2   21.59    4.38
   3   4   3  123.83   13.32
  -3   4  -3  128.78   14.52
  -3   4  -3  132.82    8.01
  -3   4  -3  116.72    7.31
   3   4   3  124.91    6.96
  -3   4  -3  105.25   11.37
   3   4   3  100.01   12.55
   3   4   3  114.47    8.44
  -3   4  -3  115.83   11.28
   3   4   3  123.22   11.31
   3  -4   3  133.67   10.73
   3  -4   3  119.98    7.34
   3  -4   3  156.08   13.92
  -3  -4  -3  117.46   13.45
  -3  -4  -3  121.52    8.01
   3   4   4   30.96    6.96
  -3   4  -4   30.50    3.90
   3   4   4   33.11    2.75
  -3   4  -4   45.88   10.99
  -3   4  -4   29.39    2.98
  -3   4  -4   39.19    8.99
   3   4   4   35.22    8.15
   3   4   4   24.24    7.88
  -3   4  -4   23.04    6.97
   3  -4   4   30.77    3.12
  -3  -4  -4   28.67    9.68
  -3  -4  -4   27.75    3.39
   3  -4   4   25.96    6.34
   3  -4   4   45.47   10.42
  -3   4  -5 1670.07   78.34
   3   4   5 1532.40   76.82
  -3   4  -5 1643.41   77.03
  -3   4  -5 1575.61   86.02
   3   4   5 1569.32   83.74
   3   4   5 1548.08   84.90
  -3   4  -5 1612.03   83.94
   3  -4   5 1461.10   81.95
   3  -4   5 1709.25   87.29
  -3  -4  -5 1575.48   77.22
   3  -4   5 1587.51   77.33
  -3  -4  -5 1641.56   85.99
   3   4   6 1922.88  103.29
   3   4   6 1963.79  101.56
  -3   4  -6 1929.65   94.33
  -3   4  -6 1836.89  101.47
  -3  -4  -6 1970.64   94.40
   3  -4   6 1945.56   94.73
   3  -4   6 2017.32  105.47
   3   4   7  665.15   42.30
   3   4   7  640.22   39.98
  -3   4  -7  585.29   40.11
   3  -4   7  648.31   33.50
  -3  -4  -7  650.89   32.95
   3  -4   7  722.81   45.72
  -3   4  -8  259.16   23.61
   3   4   8  280.15   23.24
   3   4   8  299.67   26.54
   3   4   8  272.02   18.38
   3  -4   8  304.91   29.85
   3  -4   8  309.66   23.56
  -3  -4  -8  321.22   16.94
   3  -4   8  319.93   17.72
   3   4   9  332.24   29.98
   3   4   9  351.26   21.34
  -3   4  -9  287.09   26.79
   3   4   9  314.62   26.39
  -3  -4  -9  356.62   24.04
   3  -4   9  363.46   20.33
   3  -4   9  338.70   26.27
   3   4  10   50.20   14.92
   3   4  10   40.09   12.10
   3   4  10   40.56    6.28
  -3   4 -10   41.51   11.78
  -3  -4 -10   37.02    8.72
   3  -4  10   30.90   10.60
   3  -4  10   33.55    5.94
   3  -4  10   20.94   18.77
   3   4  11   -6.69   11.33
  -3   4 -11   -9.29   12.60
   3   4  11   -6.10   14.38
   3   4  11    1.08    4.52
   3  -4  11    2.63    9.55
   3  -4  11   -2.30   18.50
   3   4  12  274.23   18.48
  -3  -5  12    4.73    8.01
   3   5 -11  529.70   39.51
  -3   5  11  517.97   41.96
  -3  -5  11  613.20   51.49
  -3  -5  11  555.52   32.91
  -3   5  10   -1.79   13.02
   3   5 -10    5.80    9.70
  -3   5  10    2.77    4.58
  -3  -5  10    7.08    6.51
  -3  -5  10   13.89   20.31
  -3   5   9    6.43   11.73
  -3   5   9   18.64    5.19
   3   5  -9   22.85   10.14
  -3  -5   9   22.56    6.98
  -3   5   8   12.53    4.52
  -3   5   8   11.37   10.44
   3   5  -8   24.61   10.17
  -3  -5   8   24.54   16.38
  -3  -5   8   15.75    5.75
  -3   5   7  566.77   38.43
   3   5  -7  611.71   38.01
  -3   5   7  568.71   31.96
   3  -5  -7  596.93   34.80
  -3  -5   7  606.88   43.35
  -3  -5   7  577.74   32.17
  -3   5   6  259.39   16.45
  -3   5   6  285.03   22.22
   3   5  -6  288.65   21.60
   3  -5  -6  262.39   13.36
   3  -5  -6  293.37   19.00
  -3  -5   6  284.98   17.09
  -3  -5   6  325.55   27.45
  -3   5   5    2.60    3.71
  -3   5   5   -0.97    6.50
   3   5  -5   -4.43    5.99
  -3  -5   5   -1.20    3.72
  -3  -5   5   -1.34   10.20
  -3   5   4  800.82   46.04
   3   5  -4  988.39   50.24
  -3   5   4  922.73   48.62
   3   5  -4  849.93   45.15
  -3   5   4  886.49   50.73
  -3  -5   4  970.26   53.77
  -3  -5   4  896.51   49.70
  -3  -5   4  913.86   45.99
  -3   5   3  342.81   24.96
  -3   5   3  366.70   23.56
  -3   5   3  334.99   22.32
  -3   5   3  379.45   20.87
   3   5  -3  359.56   22.96
   3   5  -3  355.64   20.80
   3   5  -3  396.75   24.27
  -3  -5   3  391.34   24.25
  -3  -5   3  388.81   21.23
  -3  -5   3  418.01   27.95
  -3   5   2  229.47   16.69
   3   5  -2  218.89   20.26
  -3   5   2  209.90   17.88
   3   5  -2  240.77   16.16
   3   5  -2  209.67   13.71
  -3   5   2  199.66   15.20
  -3   5   2  222.91   13.28
  -3  -5   2  250.19   16.55
  -3  -5   2  237.52   18.81
  -3  -5   2  234.84   14.03
   3   5  -1  267.99   20.50
  -3   5   1  288.14   15.78
  -3   5   1  256.24   13.10
  -3   5   1  263.30   14.90
   3   5  -1  261.99   15.47
   3   5  -1  280.05   17.02
  -3   5   1  267.79   18.71
  -3   5   1  267.91   14.37
  -3  -5   1  270.95   17.50
   3  -5  -1  273.89   17.45
  -3  -5   1  277.18   20.07
   3   5   0  464.61   32.78
   3   5   0  464.80   28.43
  -3   5   0  492.59   27.83
  -3   5   0  491.00   31.97
  -3   5   0  480.76   29.40
   3   5   0  520.53   29.05
  -3   5   0  509.22   28.92
   3   5   0  488.65   34.86
  -3  -5   0  485.04   29.63
  -3  -5   0  546.11   32.62
   3  -5   0  488.94   30.74
  -3   5  -1  736.60   34.78
   3   5   1  666.29   40.53
   3   5   1  689.17   36.48
   3   5   1  702.79   35.60
  -3   5  -1  718.97   38.25
  -3   5  -1  728.60   41.25
  -3   5  -1  706.95   35.46
  -3   5  -1  763.19   38.17
   3   5   1  722.51   43.44
  -3  -5  -1  613.82   36.10
  -3  -5  -1  666.47   39.73
   3  -5   1  758.71   39.95
  -3  -5  -1  733.59   36.91
   3  -5   1  686.33   35.42
  -3   5  -2   20.92    2.74
   3   5   2   20.40    9.46
  -3   5  -2   21.65    5.92
   3   5   2   16.12    2.18
  -3   5  -2   14.40   10.93
   3   5   2   24.28    8.96
  -3   5  -2   12.01    2.83
   3   5   2   19.83    7.01
   3   5   2   21.71    3.97
  -3   5  -2   18.62    6.07
   3  -5   2   18.55    2.76
  -3  -5  -2   15.60    3.27
  -3  -5  -2   20.38    4.00
   3  -5   2   18.32    6.82
   3   5   3  865.69   42.93
  -3   5  -3  882.93   51.63
  -3   5  -3  859.11   43.76
   3   5   3  830.36   51.95
  -3   5  -3  899.70   44.16
  -3   5  -3  944.75   48.91
  -3   5  -3  909.55   48.94
   3   5   3  887.91   52.37
  -3  -5  -3  888.49   44.58
   3  -5   3  902.29   43.85
  -3  -5  -3  968.76   51.61
   3  -5   3  869.50   50.02
   3   5   4  104.60   13.30
  -3   5  -4  111.48    7.32
   3   5   4   94.30   12.90
  -3   5  -4   82.91   14.13
   3   5   4   90.20    5.73
  -3   5  -4  105.53    6.61
  -3   5  -4  106.23   11.98
  -3  -5  -4  104.62    7.26
  -3  -5  -4  108.03   13.53
   3  -5   4  109.30   10.40
   3  -5   4  105.95   13.85
   3  -5   4   88.70    6.54
  -3   5  -5   73.68   11.11
   3   5   5   53.78   11.10
   3   5   5   81.65   11.84
   3   5   5   69.45    4.65
   3  -5   5   87.86   13.77
   3  -5   5   67.28    5.51
   3  -5   5   61.93    9.02
  -3  -5  -5   67.27    5.64
   3   5   6   12.33    7.87
  -3   5  -6    8.32    7.72
  -3  -5  -6   15.24    3.35
   3  -5   6   16.05    3.30
   3  -5   6    6.79    6.36
   3  -5   6   -7.00   13.13
   3   5   7    5.58    8.34
  -3   5  -7    4.63    8.19
   3   5   7    1.08    8.08
   3  -5   7   -1.61   14.21
   3  -5   7    3.38    3.12
  -3  -5  -7    3.35    2.83
   3   5   8  364.57   27.46
  -3   5  -8  321.24   27.49
   3   5   8  397.50   30.98
   3  -5   8  370.92   20.80
   3  -5   8  382.01   34.88
  -3  -5  -8  375.36   23.57
   3   5   9   -4.80    9.01
   3   5   9   -2.16    4.39
  -3   5  -9   11.08    9.98
   3   5   9   -5.19   12.35
   3  -5   9   -5.97   18.72
  -3  -5  -9   -0.71    6.16
   3  -5   9   -1.06    4.56
   3   5  10    5.82   10.86
   3   5  10    5.18    4.59
  -3   5 -10    1.51   10.39
   3  -5  10   -1.22    8.38
   3  -5  10   28.37   19.37
   3   5  11  356.99   22.59
  -3   5 -11  363.69   31.35
   3  -5  11  355.42   37.54
  -3  -6  12  256.03   19.34
  -3  -6  11  224.46   17.14
  -3   6  10  136.44   21.04
  -3   6  10  144.09   12.42
   3   6 -10  162.57   20.23
  -3  -6  10  163.57   13.68
  -3  -6  10  155.95   27.30
   3   6  -9  172.74   20.10
  -3   6   9  200.03   22.99
  -3   6   9  190.14   14.28
  -3  -6   9  171.17   26.68
  -3  -6   9  193.00   14.67
  -3   6   8   99.93    9.83
   3   6  -8  112.37   15.94
  -3   6   8  119.33   16.55
  -3  -6   8  140.60   22.32
  -3  -6   8  113.74   10.32
  -3   6   7  128.77   16.36
   3   6  -7  145.37   16.07
  -3   6   7  127.97   10.64
  -3  -6   7  141.04   11.24
  -3  -6   7  126.03   21.79
  -3   6   6  174.95   17.88
  -3   6   6  159.11   12.14
   3   6  -6  157.29   16.90
  -3  -6   6  181.62   12.75
  -3  -6   6  177.60   21.89
  -3   6   5   11.15    7.57
   3   6  -5   20.01    8.63
  -3  -6   5   24.19   11.60
  -3  -6   5   14.27    4.47
   3   6  -4  286.48   20.77
  -3   6   4  238.39   17.90
  -3   6   4  263.86   21.76
  -3  -6   4  286.95   17.23
  -3  -6   4  267.96   24.19
  -3   6   3  667.08   44.67
   3   6  -3  787.92   43.27
  -3   6   3  745.84   42.45
  -3  -6   3  742.78   43.41
  -3  -6   3  747.99   46.92
  -3  -6   3  780.05   40.19
  -3   6   2   11.92    3.25
   3   6  -2   11.86    5.91
  -3   6   2    3.29    6.18
  -3   6   2    5.88    6.59
  -3   6   2   23.82    6.22
  -3  -6   2   14.71    3.97
  -3  -6   2    8.39    6.32
  -3  -6   2   26.98    8.38
  -3   6   1 1326.24   65.07
   3   6  -1 1332.22   68.09
  -3   6   1 1316.52   71.35
  -3   6   1 1339.87   66.07
  -3   6   1 1282.27   67.04
   3   6  -1 1495.96   76.36
  -3   6   1 1441.36   70.91
  -3  -6   1 1321.84   66.87
  -3  -6   1 1305.13   71.95
  -3  -6   1 1329.82   68.56
   3  -6  -1 1284.16   69.41
  -3   6   0  520.40   30.38
  -3   6   0  493.47   32.11
   3   6   0  592.06   39.29
   3   6   0  527.74   31.26
  -3   6   0  531.94   31.18
  -3   6   0  489.12   35.13
  -3  -6   0  466.07   34.50
  -3  -6   0  517.14   32.07
   3  -6   0  532.94   33.88
  -3   6  -1  479.14   23.94
   3   6   1  454.80   24.78
  -3   6  -1  489.17   28.05
  -3   6  -1  488.86   32.03
  -3   6  -1  461.52   24.95
   3   6   1  525.34   34.37
  -3   6  -1  506.81   27.49
  -3  -6  -1  489.42   26.57
   3  -6   1  526.57   30.13
  -3  -6  -1  467.58   30.17
   3  -6   1  450.20   25.04
  -3   6  -2  102.61    6.51
   3   6   2   93.84    5.93
  -3   6  -2  100.02   10.84
  -3   6  -2   88.92    6.86
   3   6   2  102.03   15.30
  -3   6  -2  101.19   10.13
   3   6   2   83.92   13.85
  -3   6  -2  113.04   15.81
  -3  -6  -2   83.52    7.65
   3  -6   2   86.27    6.74
  -3  -6  -2  103.22    8.01
   3  -6   2  113.36   12.36
  -3   6  -3   27.61    7.37
   3   6   3   26.30   10.67
   3   6   3   17.64    8.95
  -3   6  -3   23.09    3.27
  -3   6  -3   21.59    4.04
   3  -6   3   17.79    3.15
   3  -6   3   25.00    8.93
  -3  -6  -3   21.91    4.30
  -3   6  -4  123.77   13.21
   3   6   4  146.60   16.69
   3   6   4  105.04   15.20
   3  -6   4  125.56   15.45
  -3  -6  -4  110.22    8.12
   3  -6   4  108.40    7.67
  -3   6  -5  207.08   17.26
   3   6   5  133.04   16.60
   3   6   5  155.81   18.14
   3  -6   5  178.68   10.87
   3  -6   5  173.59   20.15
  -3  -6  -5  161.32   10.80
   3   6   6  414.63   32.31
   3   6   6  441.18   34.56
  -3   6  -6  456.96   32.92
   3  -6   6  471.55   36.45
   3  -6   6  511.31   26.27
   3   6   7  998.57   59.36
  -3   6  -7  986.10   59.53
   3   6   7  909.21   61.26
   3  -6   7 1073.33   58.00
   3  -6   7 1021.63   51.63
   3  -6   7 1077.73   64.53
   3   6   8   39.92   11.56
  -3   6  -8   56.35   12.32
   3   6   8   61.56   14.94
   3  -6   8   62.10   18.02
   3  -6   8   49.70    5.72
   3  -6   8   32.85    9.83
   3   6   9  418.56   35.52
  -3   6  -9  432.40   33.04
   3  -6   9  425.37   39.22
   3   6  10   67.94    8.55
   3   6  10   95.25   18.97
  -3   6 -10   63.55   14.86
   3  -6  10   63.27   21.20
  -3  -7  11  114.58   12.21
  -3   7  10    7.87   14.54
  -3  -7  10    9.80    6.44
   3   7  -9   17.90   12.05
  -3   7   9    0.61    5.08
  -3   7   9    3.51   12.21
  -3  -7   9   -1.84    5.61
  -3  -7   9   17.89   18.44
  -3   7   8    3.16   10.90
   3   7  -8   -2.74   10.91
  -3   7   8    1.17    4.68
  -3  -7   8    5.80    5.21
  -3  -7   8  -12.29   16.77
   3   7  -7   11.30    9.57
  -3   7   7   18.99   10.97
  -3   7   7   -2.19    4.97
  -3  -7   7    6.04    5.04
  -3  -7   7    5.62   15.45
   3   7  -6   98.71   14.25
  -3   7   6  106.11   14.91
  -3  -7   6   91.69   17.71
  -3  -7   6   99.37    9.38
   3   7  -5    3.05    8.46
  -3   7   5   12.92    9.32
  -3  -7   5   10.52    4.97
  -3  -7   5   20.49   12.40
  -3   7   4 1388.02   84.55
   3   7  -4 1642.57   82.78
  -3  -7   4 1513.47   86.75
  -3  -7   4 1563.62   78.40
   3   7  -3  910.34   48.79
  -3  -7   3  822.65   52.89
  -3  -7   3  881.99   45.49
  -3   7   2   60.17   11.63
   3   7  -2   88.10   10.08
  -3   7   2   63.45   10.04
  -3  -7   2   80.46    7.63
  -3  -7   2   85.46   11.04
  -3  -7   2   83.78   12.82
   3   7  -1    1.62    4.99
  -3   7   1   -2.77    6.70
   3   7  -1   -3.01    9.65
  -3  -7   1    3.90    3.87
  -3  -7   1    1.07    7.04
  -3  -7   1    7.37    6.15
   3   7   0   93.91    8.43
   3   7   0   81.73   15.43
   3  -7   0   99.50   11.60
  -3  -7   0  108.76    8.88
  -3  -7   0   96.66   12.53
  -3  -7   0   99.52    9.91
  -3   7  -1  547.47   28.71
   3   7   1  642.30   40.08
  -3   7  -1  583.83   32.45
  -3  -7  -1  557.84   34.81
  -3  -7  -1  568.77   30.03
   3  -7   1  524.74   33.51
  -3  -7  -1  491.49   29.61
  -3   7  -2  928.03   47.65
   3   7   2  807.40   55.20
   3   7   2  913.51   55.01
   3  -7   2  865.34   50.04
   3  -7   2  812.94   43.55
  -3  -7  -2  901.89   44.36
  -3   7  -3  210.13   16.64
   3   7   3  209.89   22.07
   3   7   3  203.96   21.93
   3  -7   3  191.24   18.79
   3  -7   3  191.10   12.07
  -3  -7  -3  187.71   12.21
  -3   7  -4  564.93   34.70
   3   7   4  582.02   39.45
   3   7   4  503.03   38.64
   3  -7   4  542.65   37.28
   3  -7   4  539.23   28.77
   3   7   5  148.63   18.96
   3   7   5  170.66   20.43
  -3   7  -5  194.25   17.90
   3  -7   5  184.56   11.79
   3   7   6  181.12   19.89
   3   7   6  196.19   22.02
  -3   7  -6  171.77   18.89
   3  -7   6  200.91   12.52
   3  -7   6  198.46   22.12
  -3   7  -7  441.73   31.52
   3   7   7  375.21   32.62
   3   7   7  376.58   29.87
   3  -7   7  396.60   22.22
   3  -7   7  378.60   33.78
  -3   7  -8  429.83   32.87
   3   7   8  379.70   34.70
   3  -7   8  501.94   39.47
  -3   7  -9  107.39   17.55
   3   7   9  115.68   19.52
   3  -7   9  116.24   23.59
  -3  -8  10  214.80   16.92
  -3   8   9    1.85   12.77
  -3  -8   9    4.58    6.13
   3   8  -8  150.90   19.32
  -3   8   8  107.07   19.58
  -3   8   8  146.66   12.92
  -3  -8   8  157.11   13.08
  -3   8   7   11.16   11.11
  -3   8   7   16.24    5.93
   3   8  -7   22.36   11.63
  -3  -8   7   13.85    5.74
   3   8  -6  226.26   20.44
  -3  -8   6  214.55   15.51
  -3   8   5  148.02   18.41
   3   8  -5  147.35   16.69
  -3  -8   5  169.79   12.89
   3   8  -4   14.40    8.74
  -3   8   4   16.07   10.09
  -3  -8   4   14.24    5.25
  -3   8   3   99.99   15.55
   3   8  -3  136.10   14.16
  -3  -8   3  138.76   11.24
  -3   8   2  125.36   16.68
  -3  -8   2  103.23    9.63
  -3   8   1  238.86   24.51
   3   8  -1  328.12   28.29
  -3  -8   1  257.38   17.29
  -3  -8   1  298.25   19.82
   3   8   0  761.38   49.44
   3  -8   0  665.68   41.69
  -3  -8   0  696.84   37.94
   3   8   1  296.40   28.54
   3  -8   1  300.30   23.44
  -3  -8  -1  314.05   19.62
   3   8   2   15.07   11.87
   3   8   2   11.34   11.47
   3  -8   2   15.57    4.09
   3  -8   2   15.30    8.11
   3   8   3   83.64   16.44
   3   8   3   55.83   15.08
   3  -8   3   53.23    5.93
   3  -8   3   58.07   12.10
   3   8   4  312.02   29.18
   3   8   4  328.78   30.55
   3  -8   4  402.37   29.14
   3  -8   4  330.07   19.33
  -3   8  -5  170.05   18.06
   3   8   5  132.96   20.88
   3   8   5  155.84   19.68
   3  -8   5  168.99   11.37
   3  -8   5  164.75   19.88
   3   8   6  183.46   23.16
  -3   8  -6  172.76   19.43
   3  -8   6  187.30   22.86
   3   8   7   35.07   14.59
  -3   8  -7   38.69   12.77
   3  -8   7   21.33   14.15
  -3   8  -8   81.47   16.30
   3  -8   8   81.92   19.03
  -3  -9   8   -0.67    5.89
  -3   9   7   -1.75   11.69
  -3  -9   7    3.87    5.56
  -3   9   6  155.57   21.50
  -3  -9   6  199.15   15.08
  -3   9   5  203.33   23.66
  -3  -9   5  261.02   17.82
  -3   9   4  678.32   51.29
  -3  -9   4  825.95   44.10
  -3   9   3   31.47   11.49
  -3  -9   3   29.53    6.12
   3   9  -2    8.08   13.91
  -3   9   2    3.43   10.40
  -3  -9   2    9.04    4.86
   3   9  -1   81.98   18.23
  -3   9   1   67.48   15.03
  -3  -9   1   58.94    7.73
   3   9   0  204.14   24.08
  -3  -9   0  180.73   13.85
   3  -9   0  161.38   17.02
   3   9   1  148.33   23.07
   3   9   1  187.95   23.46
   3  -9   1  166.84   16.98
  -3  -9  -1  148.70   12.68
   3   9   2    9.45   13.37
   3   9   2   -4.25   14.06
   3  -9   2   -1.20    8.13
   3   9   3  105.68   19.56
   3   9   3   96.27   20.08
   3  -9   3  104.77    8.91
   3  -9   3   94.87   14.82
   3   9   4  115.33   19.83
   3  -9   4  115.40    9.41
   3  -9   4  153.21   18.47
   3   9   5  154.31   22.56
   3  -9   5  196.66   22.88
   3   9   6  184.96   24.70
   3  -9   6  204.07   24.56
   3  -9   7    1.88   14.01
  -3 -10   7   32.73    7.15
  -3 -10   6    7.28    5.78
  -3  10   5    5.48   11.47
  -3 -10   5    3.24    5.68
  -3  10   4  119.51   18.97
  -3 -10   4  127.67   11.84
  -3  10   3  118.76   18.96
   3  10  -3  161.92   25.00
  -3 -10   3  150.65   13.02
  -3 -10   3  139.22   19.87
   3  10  -2  124.07   22.77
  -3  10   2   84.66   17.08
  -3 -10   2  120.80   17.38
  -3 -10   2  107.10   10.81
   3  10  -1    6.55   14.76
  -3  10   1    6.10   10.55
  -3 -10   1   13.53   10.85
  -3 -10   1   15.40    5.63
   3  10   0 1057.48   66.33
  -3 -10   0  952.63   51.93
  -3 -10   0  930.58   58.99
   3  10   1   14.77   17.59
   3  10   1  -10.54   16.32
   3 -10   1   11.39    9.66
   3  10   2   99.29   21.57
   3 -10   2   74.34   14.18
   3  10   3  108.19   21.85
   3 -10   3  110.72   16.45
   3 -10   4   54.00   13.85
   3 -10   5   -1.70   11.16
  -3  11   0   25.76   15.71
   3 -11   1  207.75   21.91
  -4   0  13   -0.64    5.33
   4   0 -13    1.34   10.31
  -4   0  12  427.04   25.75
  -4   0  12  453.39   40.45
   4   0 -12  390.45   30.57
   4   0 -11    3.42    8.01
  -4   0  11    5.77    7.48
  -4   0  11   12.43   14.93
  -4   0  11    3.75    4.59
  -4   0  10  709.69   38.98
   4   0 -10  743.64   44.21
  -4   0  10  773.48   51.32
  -4   0  10  715.41   41.38
  -4   0   9    0.44    3.58
  -4   0   9   -4.95   11.47
   4   0  -9    0.94    7.17
  -4   0   9   -2.69    5.93
   4   0  -8  551.91   33.92
   4   0  -8  553.00   33.89
  -4   0   8  599.30   39.83
  -4   0   8  530.83   31.49
  -4   0   7    3.19    7.55
   4   0  -7   -2.96    5.93
   4   0  -7   -2.03    8.30
   4   0  -7    7.54    5.87
  -4   0   7    1.02    3.89
  -4   0   7    7.46    9.26
   4   0  -6 1068.66   57.54
   4   0  -6 1118.46   54.48
  -4   0   6 1046.71   57.79
  -4   0   6 1027.78   55.43
   4   0  -6 1177.08   60.47
  -4   0   6 1083.05   54.54
  -4   0   6 1101.03   61.56
   4   0  -6 1150.44   57.45
   4   0  -5   -1.77    4.30
   4   0  -5   -0.55    3.83
  -4   0   5   -0.79    1.92
  -4   0   5   -4.35    7.03
  -4   0   5    1.65    2.86
   4   0  -5   -2.94    7.25
   4   0  -5    0.49    2.37
  -4   0   5   -2.79    5.38
  -4   0   4  883.96   44.14
  -4   0   4  932.65   49.11
   4   0  -4  872.38   45.09
   4   0  -4  836.41   46.21
   4   0  -4  844.89   47.13
  -4   0   4  934.59   46.91
   4   0  -4  891.74   43.99
  -4   0   3    0.18    1.82
   4   0  -3    1.72    3.04
   4   0  -3    0.36    3.90
  -4   0   3    2.22    4.25
   4   0  -3    1.64    2.05
  -4   0   3    1.04    4.78
  -4   0   2 3400.32  159.97
  -4   0   2 3432.99  157.79
  -4   0   2 3216.98  159.13
   4   0  -2 2989.54  158.83
  -4   0   1    0.57    1.65
   4   0  -1    1.34    3.19
  -4   0   1    3.26    4.04
  -4   0   1    0.23    3.19
   4   0  -1    0.21    2.35
  -4   0   1   -0.75    3.63
   4   0  -1   -0.91    3.90
  -4   0   0 1732.32   82.00
  -4   0   0 1742.93   84.71
   4   0   0 1696.39   82.55
   4   0   0 1718.39   82.05
  -4   0   0 1611.44   82.65
   4   0   0 1717.74   81.88
   4   0   1   -0.61    1.22
  -4   0  -1   -0.61    1.04
  -4   0  -1   -1.39    3.01
   4   0   1   -0.95    2.43
  -4   0  -1   -0.52    1.78
   4   0   1   -0.12    1.28
   4   0   2 9048.19  445.07
  -4   0  -2 9213.66  444.80
  -4   0  -2 8743.80  443.07
  -4   0  -2 9481.23  446.38
   4   0   2 8881.09  442.56
   4   0   2 8562.64  446.15
  -4   0  -3   -2.24    5.55
   4   0   3    0.10    1.36
  -4   0  -3   -0.31    1.77
   4   0   3    1.11    1.26
   4   0   3    1.49    4.48
   4   0   3    3.78    4.39
  -4   0  -3    0.87    4.80
  -4   0  -4  361.77   23.12
   4   0   4  341.39   18.21
   4   0   4  356.59   22.38
   4   0   4  358.02   22.68
  -4   0  -4  385.19   22.31
   4   0   4  338.83   17.71
  -4   0  -5    4.80    6.64
   4   0   5   -0.17    1.65
   4   0   5    2.28    5.43
   4   0   5   -0.94    1.78
   4   0   5    1.47    5.17
  -4   0  -5    0.72    6.66
   4   0   6  258.82   14.70
  -4   0  -6  288.65   15.34
  -4   0  -6  280.03   21.00
   4   0   6  253.25   19.86
   4   0   6  280.82   19.90
   4   0   7   -0.94    2.11
   4   0   7   -0.92    6.00
   4   0   7    7.83    6.68
   4   0   8 1302.61   64.01
   4   0   8 1374.86   72.07
   4   0   9    0.31    2.68
   4   0   9   -2.41    7.11
   4   0   9    1.50   10.30
  -4   0  -9    2.23    7.75
   4   0  10   10.71   12.54
  -4   0 -10    1.24    9.59
   4   0  10   14.57    3.67
   4   0  10    9.02    9.54
   4   0  11   -4.12   14.06
  -4   0 -11   -5.30    9.37
   4   0  11    1.18    3.19
   4   0  11   24.59   11.98
   4   0  12  198.00   27.68
   4   0  12  178.69   12.42
  -4   0 -12  163.89   19.15
   4   0  12  129.68   18.39
  -4   0 -13    3.03   11.29
   4  -1 -14   99.12   15.66
   4   1 -13  175.73   20.48
  -4   1  13  160.10   14.30
  -4  -1  13  192.81   14.71
   4  -1 -13  180.94   18.98
  -4   1  12  168.50   25.24
  -4   1  12  150.96   12.77
   4   1 -12  160.03   18.25
  -4  -1  12  168.29   13.32
  -4  -1  12  193.49   28.23
   4  -1 -12  121.92   15.77
  -4  -1  12  145.70   15.48
   4   1 -11  161.36   17.80
  -4   1  11  211.25   25.45
  -4   1  11  171.28   12.93
  -4  -1  11  147.45   12.55
  -4  -1  11  143.41   24.63
  -4  -1  11  159.19   15.02
   4  -1 -11  146.68   16.27
  -4   1  10   20.27    6.90
  -4   1  10   26.43    5.32
  -4   1  10    7.09   12.70
   4   1 -10   10.18    8.36
   4  -1 -10   27.74    8.89
  -4  -1  10   26.05    7.55
  -4  -1  10   22.40    5.46
  -4  -1  10   28.88   16.23
  -4   1   9   20.10    6.73
   4   1  -9    4.10    7.74
  -4   1   9   -1.52   11.06
  -4  -1   9   22.34    4.73
   4  -1  -9    7.71    6.73
  -4  -1   9   -5.16   13.34
   4  -1  -9   20.64    8.72
  -4  -1   9   17.07    6.67
  -4   1   8  212.46   15.64
   4   1  -8  214.98   18.38
  -4   1   8  193.01   19.85
   4  -1  -8  250.06   17.85
   4  -1  -8  269.89   18.34
  -4  -1   8  225.88   14.45
  -4  -1   8  203.40   15.97
  -4  -1   8  252.96   24.10
  -4   1   7 1450.81   72.65
   4   1  -7 1443.71   72.86
   4   1  -7 1349.08   72.88
  -4   1   7 1392.20   68.60
  -4   1   7 1319.63   69.62
  -4   1   7 1147.68   73.09
   4  -1  -7 1384.29   71.61
   4  -1  -7 1437.65   74.55
  -4  -1   7 1487.34   78.52
  -4  -1   7 1333.76   70.40
   4  -1  -7 1498.04   71.86
   4   1  -6 1302.26   75.40
   4   1  -6 1446.67   71.40
  -4   1   6 1432.32   71.60
  -4   1   6 1521.25   74.92
  -4   1   6 1145.13   74.44
   4   1  -6 1455.71   74.60
  -4   1   6 1424.36   72.32
  -4  -1   6 1524.95   79.93
  -4  -1   6 1447.56   73.29
   4  -1  -6 1431.89   74.05
   4  -1  -6 1558.92   73.88
   4  -1  -6 1647.69   77.24
   4  -1  -6 1504.95   71.92
  -4  -1   6 1452.40   75.73
  -4   1   5  241.30   15.99
   4   1  -5  204.22   15.12
  -4   1   5  231.08   13.30
   4   1  -5  177.29   15.76
  -4   1   5  196.98   13.35
   4   1  -5  213.08   13.03
   4  -1  -5  251.31   17.36
   4  -1  -5  215.79   14.47
  -4  -1   5  219.94   16.60
   4  -1  -5  239.16   13.58
  -4  -1   5  222.59   19.27
   4  -1  -5  199.76   14.74
  -4  -1   5  218.52   13.29
   4   1  -4 1275.17   63.36
  -4   1   4 1098.28   63.79
  -4   1   4 1330.02   63.87
   4   1  -4 1247.96   61.69
  -4   1   4 1224.53   61.72
  -4   1   4 1219.63   61.52
   4   1  -4 1272.77   66.24
  -4  -1   4 1306.01   67.50
   4  -1  -4 1277.61   63.50
   4  -1  -4 1252.14   61.84
  -4  -1   4 1306.81   62.13
   4  -1  -4 1275.39   62.48
  -4  -1   4 1282.67   65.05
   4  -1  -4 1360.26   65.16
   4   1  -3   17.49    2.65
  -4   1   3   16.96    4.74
  -4   1   3   17.72    2.59
   4   1  -3   23.19    7.50
  -4   1   3   15.75    4.39
   4   1  -3   16.08    4.39
   4   1  -3   17.77    3.59
   4  -1  -3   16.39    3.92
   4  -1  -3   15.44    4.99
  -4  -1   3   11.65    4.97
  -4  -1   3   20.02    3.02
  -4  -1   3   21.37    6.79
   4  -1  -3   15.51    2.80
  -4   1   2  940.11   49.49
   4   1  -2  970.91   51.40
   4   1  -2 1025.88   50.44
   4   1  -2  974.42   48.46
  -4   1   2  977.96   48.31
  -4   1   2  969.94   49.37
   4  -1  -2  980.39   49.10
  -4  -1   2 1029.55   48.77
  -4  -1   2 1022.59   50.46
   4  -1  -2 1013.67   49.49
   4  -1  -2  979.52   47.64
  -4  -1   2 1023.09   51.69
  -4   1   1 9057.47  443.14
  -4   1   1 9212.00  442.91
   4   1  -1 9213.92  444.03
  -4   1   1 8637.33  442.65
  -4   1   1 9599.84  442.42
   4   1  -1 9361.51  444.61
  -4  -1   1 9505.42  444.14
  -4  -1   1 9811.15  444.49
   4  -1  -1 9039.95  442.60
   4  -1  -1 9639.01  442.39
  -4  -1   1 9280.86  443.00
  -4   1   0  338.27   18.37
  -4   1   0  348.77   16.56
  -4   1   0  329.17   17.28
   4   1   0  332.89   18.42
   4   1   0  341.66   17.88
  -4  -1   0  326.47   17.22
   4  -1   0  328.89   16.54
  -4  -1   0  318.30   20.71
  -4  -1   0  333.51   18.12
   4  -1   0  346.93   18.25
  -4  -1   0  324.46   17.95
  -4   1  -1  905.73   43.11
   4   1   1  850.18   40.80
   4   1   1  840.72   41.66
   4   1   1  805.58   40.55
   4   1   1  865.18   42.96
   4   1   1  767.92   44.35
  -4   1  -1  830.09   40.55
  -4   1  -1  770.72   41.03
   4  -1   1  781.21   42.50
  -4  -1  -1  830.88   44.97
  -4  -1  -1  859.09   40.62
   4   1   2  616.04   30.62
  -4   1  -2  648.81   30.76
   4   1   2  610.86   33.26
  -4   1  -2  629.52   33.72
  -4   1  -2  679.58   33.00
   4   1   2  624.29   30.63
   4   1   2  617.78   34.45
  -4  -1  -2  619.47   33.76
  -4  -1  -2  597.42   35.57
   4  -1   2  596.37   30.73
  -4  -1  -2  606.72   30.62
   4  -1   2  582.33   32.95
  -4   1  -3    5.99    2.12
   4   1   3    2.90    1.94
   4   1   3    1.97    1.44
   4   1   3   -2.07    4.40
   4   1   3    5.38    4.93
  -4   1  -3   -2.19    6.08
  -4   1  -3   -0.95    5.39
   4  -1   3   -0.53    4.77
   4  -1   3    2.13    1.64
  -4  -1  -3    4.75    5.56
  -4  -1  -3    1.32    6.47
  -4  -1  -3    1.77    1.77
  -4   1  -4    8.09    6.26
   4   1   4    3.37    5.46
   4   1   4    3.31    4.64
   4   1   4    2.90    1.71
  -4   1  -4   -0.66    6.34
   4   1   4    4.82    2.06
  -4   1  -4    5.89    2.17
   4  -1   4   -2.75    5.41
   4  -1   4   11.17    5.76
   4  -1   4    4.51    1.96
  -4  -1  -4   -2.92    6.84
   4  -1   4    3.25    1.30
  -4  -1  -4    4.59    2.00
  -4  -1  -4    8.86    6.28
  -4   1  -5  883.58   44.37
  -4   1  -5  857.86   44.32
   4   1   5  796.31   44.33
   4   1   5  719.87   42.89
  -4   1  -5  771.60   38.35
   4   1   5  711.86   38.04
   4  -1   5  748.22   44.11
  -4  -1  -5  756.60   43.38
  -4  -1  -5  853.98   38.45
   4  -1   5  751.75   43.24
   4  -1   5  733.06   37.39
   4   1   6 3866.77  199.32
   4   1   6 3854.21  199.36
   4   1   6 4345.99  207.02
  -4   1  -6 4265.44  206.07
  -4   1  -6 4637.78  206.89
   4   1   6 3988.54  205.14
   4  -1   6 4003.63  198.67
   4  -1   6 4008.82  206.86
  -4  -1  -6 4301.47  205.85
   4  -1   6 3769.91  204.80
   4   1   7  177.14   17.37
   4   1   7  197.65   12.52
   4   1   7  239.88   19.62
   4  -1   7  199.89   11.95
   4  -1   7  188.98   17.70
   4  -1   7  193.61   19.72
   4   1   8  157.43   15.70
   4   1   8  154.04   10.06
   4   1   8  133.94   16.07
   4  -1   8  144.43    9.44
   4  -1   8  150.39   16.16
   4  -1   8  140.47   18.26
   4   1   9   98.16   13.66
  -4   1  -9   57.94   11.51
   4   1   9   72.85   11.25
   4   1   9   82.74    6.94
   4  -1   9   50.39   10.75
   4  -1   9   87.89   16.17
   4  -1   9   76.69    6.42
  -4   1 -10  350.52   28.57
   4   1  10  391.04   29.84
   4   1  10  281.95   27.62
   4   1  10  385.08   21.97
   4  -1  10  400.40   35.02
  -4  -1 -10  364.53   28.28
   4  -1  10  409.51   21.85
   4  -1  10  376.14   29.30
  -4   1 -11   94.62   15.76
   4   1  11   83.11   17.83
   4   1  11  147.07   17.92
   4   1  11  129.05    9.74
   4  -1  11  104.76   21.23
   4  -1  11  103.51   15.45
   4  -1  11  119.77    9.28
  -4  -1 -11  137.40   16.37
   4   1  12   21.59   16.48
  -4   1 -12    4.48   11.31
   4   1  12    9.74    4.12
   4   1  12    4.39   10.74
   4  -1  12   14.41   10.66
  -4  -1 -12    9.44   10.46
   4  -1  12   30.70   19.22
   4  -1  12   10.82    3.85
   4   1  13    4.52    4.54
  -4  -1 -13    7.22    9.27
   4  -2 -13    9.13    9.71
  -4  -2  13    0.68    6.00
   4   2 -12  203.20   21.27
  -4   2  12  216.67   26.69
  -4   2  12  203.29   15.34
  -4  -2  12  200.24   29.56
   4  -2 -12  244.93   19.86
  -4  -2  12  193.01   15.51
   4   2 -11   26.35   11.42
  -4   2  11   33.49   15.49
  -4   2  11   22.81    5.37
   4  -2 -11   28.79    8.80
  -4  -2  11   29.17    6.62
  -4  -2  11   51.21   19.57
  -4   2  10   39.89   12.25
   4   2 -10   57.96   11.71
  -4  -2  10   68.86    8.00
   4  -2 -10   66.49   10.56
  -4  -2  10   76.61   19.31
   4   2  -9  855.43   53.46
  -4   2   9  866.15   49.26
  -4  -2   9  900.21   59.70
   4  -2  -9  974.42   51.36
  -4  -2   9  994.47   48.80
   4  -2  -9  987.38   52.32
  -4   2   8  166.93   16.26
  -4   2   8  204.37   14.18
  -4   2   8  184.42   12.64
   4  -2  -8  171.90   14.86
  -4  -2   8  196.42   13.19
  -4  -2   8  191.77   22.30
   4  -2  -8  218.69   16.29
  -4   2   7   22.58    4.89
  -4   2   7   13.89    7.39
  -4   2   7   27.55    4.18
  -4   2   7   31.98    7.36
   4   2  -7   34.02    8.21
   4  -2  -7   35.57    6.57
   4  -2  -7   23.04    5.87
  -4  -2   7   33.81    4.97
  -4  -2   7   39.60   12.19
  -4   2   6   47.23    5.59
   4   2  -6   64.03    9.05
  -4   2   6   59.69    5.40
   4   2  -6   61.42    5.52
  -4   2   6   56.56    9.36
   4   2  -6   54.95   10.91
  -4   2   6   63.93    8.17
   4   2  -6   53.12    8.45
   4  -2  -6   58.38    9.54
  -4  -2   6   34.38   11.59
   4  -2  -6   56.95    7.19
  -4  -2   6   63.13    9.57
   4  -2  -6   66.11    7.35
   4   2  -5  194.62   17.82
  -4   2   5  213.25   16.20
   4   2  -5  192.24   15.34
  -4   2   5  193.11   13.48
  -4   2   5  188.83   11.69
  -4   2   5  183.53   11.74
   4   2  -5  195.42   11.80
   4   2  -5  193.67   14.29
   4  -2  -5  220.04   13.00
   4  -2  -5  207.08   15.79
  -4  -2   5  220.49   15.89
  -4  -2   5  228.13   19.30
   4  -2  -5  197.22   13.00
   4   2  -4  499.19   26.70
  -4   2   4  514.39   26.01
   4   2  -4  513.89   32.31
  -4   2   4  510.96   30.17
  -4   2   4  550.67   28.17
   4   2  -4  505.39   29.95
  -4   2   4  521.42   26.77
   4   2  -4  484.21   28.47
   4  -2  -4  536.12   26.67
  -4  -2   4  503.21   27.16
   4  -2  -4  523.68   30.08
  -4  -2   4  550.43   30.59
  -4  -2   4  556.54   33.41
   4  -2  -4  506.40   27.47
   4   2  -3  984.80   55.51
  -4   2   3 1019.54   50.83
   4   2  -3 1088.94   54.05
  -4   2   3 1052.64   53.43
  -4   2   3 1009.49   51.56
   4   2  -3  997.36   50.99
  -4  -2   3 1025.11   51.41
  -4  -2   3 1074.22   56.36
  -4  -2   3 1003.67   53.87
   4  -2  -3 1060.15   51.24
   4  -2  -3 1091.58   53.65
   4   2  -2  519.39   26.35
   4   2  -2  525.30   28.71
  -4   2   2  502.18   26.45
   4   2  -2  453.12   29.84
  -4   2   2  542.22   26.04
  -4   2   2  476.13   27.40
  -4  -2   2  531.69   26.71
  -4  -2   2  450.15   28.10
   4  -2  -2  511.55   25.89
   4  -2  -2  543.01   28.26
  -4  -2   2  517.60   29.98
   4   2  -1  573.29   28.57
  -4   2   1  540.60   26.32
   4   2  -1  523.67   26.94
  -4   2   1  443.95   26.11
   4   2  -1  627.33   31.97
  -4   2   1  505.61   26.52
  -4   2   1  553.83   27.03
  -4   2   1  528.49   27.63
   4   2  -1  497.05   29.60
  -4  -2   1  543.55   27.11
   4  -2  -1  566.87   26.15
  -4  -2   1  565.79   29.85
   4   2   0 1249.95   60.68
  -4   2   0 1169.19   59.26
  -4   2   0 1233.19   59.05
   4   2   0 1092.75   61.58
  -4   2   0 1237.14   60.53
  -4   2   0 1241.85   60.44
   4   2   0 1289.93   64.60
  -4  -2   0 1341.21   64.15
  -4  -2   0 1250.52   60.04
   4  -2   0 1183.06   60.26
   4  -2   0 1165.74   59.74
   4  -2   0 1305.15   59.36
  -4  -2   0 1210.07   61.66
   4   2   1   44.03    3.71
  -4   2  -1   37.14    2.41
   4   2   1   57.80    8.52
  -4   2  -1   46.31    6.09
  -4   2  -1   45.64    2.48
   4   2   1   47.08    5.72
  -4   2  -1   43.33    3.30
  -4   2  -1   47.84    5.83
   4  -2   1   48.21    5.50
   4  -2   1   44.43    3.26
  -4  -2  -1   39.32    4.57
   4  -2   1   49.78    5.58
  -4  -2  -1   46.44    3.72
  -4  -2  -1   44.39    8.26
  -4   2  -2 1829.03   89.69
   4   2   2 1756.60   86.32
   4   2   2 1664.17   86.67
  -4   2  -2 1762.41   89.42
   4   2   2 1720.28   88.48
   4   2   2 1810.78   91.86
  -4  -2  -2 1672.39   86.65
   4  -2   2 1759.56   89.24
  -4  -2  -2 1832.83   91.96
  -4  -2  -2 1716.42   86.76
   4  -2   2 1657.09   89.08
  -4   2  -3 6146.86  269.62
  -4   2  -3 4940.35  268.19
  -4   2  -3 6271.70  274.00
  -4   2  -3 5282.13  272.19
   4   2   3 6130.62  269.82
   4   2   3 7190.88  269.89
   4   2   3 5712.71  274.52
   4  -2   3 6123.81  274.24
  -4  -2  -3 6011.91  274.99
  -4  -2  -3 6081.07  269.49
   4   2   4   75.40    9.93
  -4   2  -4  104.89    9.22
   4   2   4   80.38    6.04
  -4   2  -4   73.25    5.66
  -4   2  -4   81.93    4.74
   4   2   4   79.74    5.32
  -4   2  -4   83.17   10.48
  -4  -2  -4   79.42    5.49
   4  -2   4   79.47   10.58
  -4  -2  -4   75.84   10.46
   4   2   5   35.73    8.03
   4   2   5   43.99    4.11
  -4   2  -5   66.56    9.92
  -4   2  -5   40.29    8.25
   4   2   5   43.07    8.29
   4   2   5   50.75    4.85
  -4   2  -5   51.20    4.71
  -4  -2  -5   58.78    9.96
   4  -2   5   53.06   10.35
  -4  -2  -5   52.66    4.29
   4  -2   5   36.23    7.69
   4  -2   5   52.65    3.72
  -4  -2  -5   48.42   10.55
   4   2   6  127.12   14.13
   4   2   6  134.30    9.13
   4   2   6  132.59   13.51
  -4   2  -6  163.35   15.61
   4   2   6  128.60    8.41
  -4  -2  -6  129.82   15.08
   4  -2   6  160.98   16.50
   4  -2   6  126.00    7.78
   4  -2   6  118.58   12.68
  -4  -2  -6  134.88    8.41
  -4  -2  -6  124.76   14.53
   4   2   7    1.99    6.93
   4   2   7   -1.21    8.04
   4   2   7    0.98    2.52
   4  -2   7    3.97    2.17
  -4  -2  -7    0.52    2.43
   4  -2   7    0.97    6.87
   4  -2   7    9.40   10.08
   4   2   8   77.67   12.00
   4   2   8   92.07   14.09
   4   2   8   73.57    6.74
  -4   2  -8   64.43   11.35
   4  -2   8   73.47    5.92
   4  -2   8   65.95   11.34
   4  -2   8   73.96   15.13
   4   2   9 1363.01   75.39
   4   2   9 1295.75   77.46
   4   2   9 1342.74   67.91
   4  -2   9 1364.58   67.03
   4  -2   9 1319.61   74.84
   4  -2   9 1337.03   80.25
   4   2  10   84.60    8.00
   4   2  10  104.56   15.81
   4   2  10   70.33   13.48
   4  -2  10  102.37    7.84
   4  -2  10  108.07   14.69
  -4  -2 -10   81.44   13.08
   4  -2  10   62.75   18.60
   4   2  11    7.07   10.38
   4   2  11   16.66    4.67
  -4   2 -11   18.88   11.43
   4   2  11   10.81    7.76
  -4  -2 -11    8.33    9.16
   4  -2  11   14.74   10.62
   4  -2  11   11.88    4.17
   4  -2  11    8.73   17.29
   4   2  12  140.36   20.79
   4   2  12  157.83   12.24
   4   2  12  169.45   20.36
  -4   2 -12  171.16   20.66
  -4  -2 -12  160.49   18.22
   4  -2  12  192.02   20.29
   4  -2  12  195.54   28.21
   4   2  13   15.50    5.46
  -4  -2 -13    6.79   10.61
  -4  -3  13  510.27   31.16
   4   3 -12  164.68   20.15
  -4   3  12  146.05   12.74
  -4   3  12  130.80   21.30
  -4  -3  12  187.72   29.71
  -4  -3  12  159.47   13.67
   4   3 -11  293.47   26.62
  -4   3  11  234.66   25.58
  -4  -3  11  333.23   21.16
  -4  -3  11  333.37   36.07
   4  -3 -11  317.03   22.73
  -4   3  10    5.25    6.49
   4  -3 -10   18.31    7.35
  -4  -3  10   15.37    5.85
  -4  -3  10   10.44   16.42
  -4   3   9 1038.25   55.87
  -4   3   9  928.75   62.37
   4  -3  -9 1126.47   59.84
  -4  -3   9 1149.75   56.73
   4  -3  -9 1093.54   58.00
  -4  -3   9 1203.46   70.53
  -4   3   8 4238.56  215.74
  -4   3   8 4288.61  223.68
   4   3  -8 4519.39  222.39
   4  -3  -8 4561.91  218.92
  -4  -3   8 4634.50  216.51
   4  -3  -8 4560.54  217.54
  -4  -3   8 4446.92  228.26
  -4   3   7  222.54   20.77
  -4   3   7  239.35   14.79
  -4   3   7  205.01   14.78
   4   3  -7  241.81   19.50
  -4  -3   7  234.59   24.64
   4  -3  -7  235.84   15.87
  -4  -3   7  254.30   15.46
   4  -3  -7  228.66   16.72
  -4   3   6  666.38   39.12
   4   3  -6  780.86   44.51
   4   3  -6  740.56   42.86
  -4   3   6  804.04   45.64
   4   3  -6  736.82   39.10
  -4   3   6  748.10   39.41
   4  -3  -6  800.49   40.22
   4  -3  -6  782.95   41.01
   4  -3  -6  821.06   45.61
  -4  -3   6  810.57   49.17
  -4  -3   6  827.68   40.27
  -4   3   5   25.00    3.59
   4   3  -5   14.48    6.63
  -4   3   5   19.65    3.33
   4   3  -5   15.58    3.59
   4   3  -5   22.47    6.31
  -4   3   5   23.67    4.99
  -4   3   5   13.45    6.15
  -4  -3   5   21.25   10.81
   4  -3  -5   27.31    7.77
   4  -3  -5   14.69    3.49
   4  -3  -5   19.70    4.75
  -4  -3   5   24.85    7.29
  -4   3   4 5701.49  283.49
   4   3  -4 5925.14  283.51
  -4   3   4 6294.72  283.76
   4   3  -4 6069.97  287.57
  -4   3   4 5628.02  282.42
  -4   3   4 6028.58  287.20
   4  -3  -4 5789.43  287.57
  -4  -3   4 6242.42  290.99
   4  -3  -4 6029.45  283.16
   4  -3  -4 5993.08  282.95
  -4   3   3 3791.76  174.49
   4   3  -3 3565.07  174.50
  -4   3   3 3655.24  174.21
  -4   3   3 3687.03  177.25
   4   3  -3 3856.63  178.00
  -4  -3   3 3753.79  180.44
   4  -3  -3 3685.51  178.38
  -4  -3   3 3278.06  174.72
  -4   3   2 5398.15  276.90
   4   3  -2 5860.42  277.54
  -4   3   2 5631.62  274.29
   4   3  -2 5663.53  274.90
  -4   3   2 5739.53  274.64
  -4   3   2 5880.10  275.96
  -4  -3   2 5912.26  279.55
  -4  -3   2 5941.75  275.33
  -4  -3   2 5766.09  277.37
   4  -3  -2 5738.80  273.48
  -4   3   1 3396.50  182.02
  -4   3   1 3420.80  179.68
   4   3  -1 3542.96  181.65
  -4   3   1 3567.90  181.26
  -4   3   1 3412.56  179.12
   4   3  -1 3527.16  180.09
   4   3  -1 3878.98  186.16
  -4  -3   1 3614.89  181.74
  -4  -3   1 3707.25  180.42
  -4  -3   1 3743.38  183.82
   4   3   0    3.16    6.30
  -4   3   0    6.74    1.63
  -4   3   0    6.37    1.50
   4   3   0    6.55    2.68
  -4   3   0    4.07    5.41
   4   3   0    7.80    2.86
  -4   3   0    6.36    4.01
   4  -3   0    6.54    3.03
  -4  -3   0   12.53    4.35
   4  -3   0    8.69    1.43
  -4  -3   0    2.91    4.29
   4  -3   0    9.71    2.67
  -4  -3   0    9.41    2.65
   4   3   1   75.73   10.87
  -4   3  -1   69.48    8.76
   4   3   1   70.04    5.42
  -4   3  -1   75.70    4.46
  -4   3  -1   77.36    7.84
  -4   3  -1   86.78    4.99
  -4  -3  -1   80.72   10.85
  -4  -3  -1   74.66    7.56
   4  -3   1   67.40    6.50
  -4  -3  -1   67.28    5.43
   4  -3   1   81.89    7.66
  -4  -3  -1   58.19    6.18
   4  -3   1   69.96    4.81
   4   3   2  275.96   14.95
  -4   3  -2  285.86   14.35
  -4   3  -2  284.67   19.40
   4   3   2  299.73   21.85
  -4   3  -2  304.76   18.93
  -4   3  -2  290.37   15.21
   4  -3   2  287.99   18.60
  -4  -3  -2  276.02   15.75
  -4  -3  -2  277.66   15.88
   4  -3   2  280.29   17.64
   4  -3   2  306.07   15.46
  -4   3  -3 1012.68   48.36
  -4   3  -3  969.28   47.15
   4   3   3  947.52   48.79
   4   3   3  991.49   47.85
   4   3   3  909.17   54.01
  -4   3  -3 1011.95   53.60
  -4   3  -3 1038.94   52.91
   4  -3   3  935.16   51.52
   4  -3   3 1029.56   53.66
  -4  -3  -3  962.55   48.52
   4   3   4 2299.20  112.58
   4   3   4 2228.78  118.72
   4   3   4 2324.59  113.72
  -4   3  -4 2385.69  119.24
  -4   3  -4 2385.65  112.01
  -4   3  -4 2367.92  113.36
  -4   3  -4 2533.68  118.91
  -4  -3  -4 2284.10  112.95
  -4  -3  -4 2287.16  120.39
  -4  -3  -4 2476.89  121.16
   4  -3   4 2192.21  117.10
   4  -3   4 2345.17  119.30
   4   3   5 1761.80   84.09
  -4   3  -5 1773.64   83.75
  -4   3  -5 1817.13   89.94
  -4   3  -5 1721.36   82.25
  -4   3  -5 1367.52   87.16
   4   3   5 1603.47   89.01
   4   3   5 1646.34   82.82
  -4  -3  -5 1709.95   91.82
   4  -3   5 1700.64   90.90
  -4  -3  -5 1672.79   82.93
   4  -3   5 1740.93   82.44
  -4  -3  -5 1695.27   91.21
   4   3   6 1181.80   61.33
  -4   3  -6 1274.41   59.71
   4   3   6 1195.24   66.76
   4   3   6 1141.59   60.04
  -4  -3  -6 1194.02   60.06
   4  -3   6 1262.75   59.83
   4  -3   6 1170.17   69.07
   4   3   7   -5.11    7.10
  -4   3  -7    1.08    6.86
   4  -3   7   -1.06    2.52
  -4  -3  -7    1.70    2.69
   4  -3   7   -7.09   11.53
   4  -3   7    0.97    6.77
   4   3   8 1416.73   80.57
   4   3   8 1402.51   74.30
  -4   3  -8 1422.94   81.28
   4  -3   8 1399.02   80.20
   4  -3   8 1573.18   73.14
   4  -3   8 1495.08   85.74
   4   3   9   31.64    5.47
  -4   3  -9   22.22   10.15
   4   3   9   29.38   10.07
   4  -3   9   52.77   16.84
   4  -3   9   24.26    9.26
   4  -3   9   32.73    4.73
  -4   3 -10   60.76   13.56
   4   3  10   58.86   12.72
   4   3  10   65.39    7.25
   4  -3  10   58.36    6.28
  -4  -3 -10   69.19   11.23
   4  -3  10   59.08   12.25
   4  -3  10   83.32   20.38
   4   3  11  265.51   17.03
   4   3  11  238.46   26.57
   4   3  11  249.26   24.24
  -4  -3 -11  261.57   22.09
   4  -3  11  294.69   32.89
   4  -3  11  219.56   22.54
   4   3  12   12.69    4.90
   4   3  12    3.02   12.03
   4  -3  12   19.77   20.12
  -4  -3 -12    4.76    9.08
   4   3  13  132.84   11.52
  -4   4  12   16.10   11.63
  -4  -4  12   17.61    8.27
   4   4 -11   47.15   14.09
  -4   4  11   84.52   16.06
  -4  -4  11   70.45    9.96
  -4  -4  11   50.19   21.80
   4   4 -10   27.47   10.86
  -4   4  10   26.68    5.60
  -4   4  10   23.51   12.11
  -4  -4  10   32.91   19.94
  -4  -4  10   23.24    7.10
   4   4  -9    3.79    9.10
  -4   4   9    1.51    9.81
  -4   4   9   -2.45    4.33
  -4  -4   9   -4.00   16.62
   4  -4  -9    4.44    5.28
  -4  -4   9    4.29    6.01
  -4   4   8 1614.58   88.51
   4   4  -8 1724.06   94.93
  -4   4   8 1812.71   97.51
  -4  -4   8 1712.30  101.73
   4  -4  -8 1719.42   88.92
   4  -4  -8 1869.89   86.59
   4  -4  -8 1837.02   92.50
  -4  -4   8 1845.52   89.61
  -4   4   7   23.51    9.26
  -4   4   7   10.16    3.72
   4   4  -7   20.78    8.65
  -4  -4   7   11.33    5.34
   4  -4  -7   12.73    6.63
  -4  -4   7    4.93   12.63
   4  -4  -7   18.39    4.59
   4   4  -6   80.53   11.66
  -4   4   6   78.84    7.18
  -4   4   6  100.86   11.84
  -4   4   6   76.54    7.05
   4  -4  -6   85.49    8.76
  -4  -4   6   85.82    8.23
   4  -4  -6   82.73    6.40
  -4  -4   6   83.20   15.78
   4   4  -5  370.58   24.52
   4   4  -5  334.48   19.84
  -4   4   5  366.72   24.58
  -4   4   5  356.52   20.33
  -4   4   5  342.39   19.52
  -4  -4   5  380.86   28.78
   4  -4  -5  376.51   26.63
   4  -4  -5  396.93   20.84
  -4  -4   5  366.00   20.96
  -4   4   4 1240.69   58.24
  -4   4   4 1172.07   63.24
   4   4  -4 1236.54   63.66
   4   4  -4 1163.97   61.76
  -4   4   4 1238.38   59.48
   4   4  -4 1144.02   59.25
  -4   4   4 1098.15   58.26
  -4  -4   4 1247.94   67.14
  -4  -4   4 1169.33   63.23
   4  -4  -4 1274.48   65.77
  -4  -4   4 1189.73   59.98
  -4   4   3  528.00   25.37
  -4   4   3  438.43   25.92
  -4   4   3  536.26   28.82
   4   4  -3  529.43   30.16
  -4   4   3  524.52   30.19
   4   4  -3  490.38   26.76
  -4  -4   3  536.97   33.02
  -4  -4   3  554.76   30.56
  -4   4   2   13.85    2.47
  -4   4   2   11.90    2.06
   4   4  -2    8.07    4.56
  -4   4   2    9.70    3.45
  -4   4   2    8.12    4.94
   4   4  -2   15.23    4.36
  -4   4   2   17.10    5.35
  -4  -4   2   20.27    7.66
  -4  -4   2   10.42    5.22
  -4   4   1 2252.13  119.82
   4   4  -1 2848.25  124.78
   4   4  -1 2330.95  116.42
  -4   4   1 2296.53  114.79
  -4   4   1 2320.52  116.19
   4   4  -1 2391.32  118.11
  -4   4   1 2444.19  115.78
  -4   4   1 2427.25  118.60
  -4  -4   1 2490.50  116.90
  -4  -4   1 2489.14  118.41
   4  -4  -1 2439.99  114.72
  -4  -4   1 2457.62  120.95
   4   4   0   -0.52    2.67
  -4   4   0    0.35    3.75
  -4   4   0    0.53    5.33
  -4   4   0    1.57    1.25
  -4   4   0    1.41    1.77
   4   4   0   -3.86    6.58
   4   4   0   -1.65    2.89
  -4  -4   0    3.72    4.62
  -4  -4   0   -0.84    2.11
   4  -4   0    1.63    3.25
  -4  -4   0   -0.79    4.45
   4  -4   0   -1.41    1.32
  -4   4  -1  138.31   11.23
   4   4   1  133.94    9.08
   4   4   1  142.14    9.53
  -4   4  -1  137.39    8.35
  -4   4  -1  127.68   13.32
   4   4   1  144.35   15.21
   4  -4   1  149.82   10.29
  -4  -4  -1  137.96    9.39
   4  -4   1  148.86   11.79
  -4  -4  -1  115.73   11.44
  -4  -4  -1  139.33   10.35
  -4   4  -2 3028.44  139.77
  -4   4  -2 3113.69  145.62
   4   4   2 2922.07  139.67
   4   4   2 3115.32  148.77
  -4   4  -2 2820.13  139.29
   4   4   2 2648.79  140.61
  -4   4  -2 2889.43  143.58
  -4  -4  -2 2891.00  140.99
   4  -4   2 2943.38  142.45
   4  -4   2 2920.76  139.30
   4  -4   2 2955.75  143.99
  -4  -4  -2 2904.45  140.94
  -4  -4  -2 3123.14  146.99
  -4   4  -3 1475.04   70.86
  -4   4  -3 1538.86   77.58
   4   4   3 1431.63   78.75
  -4   4  -3 1468.28   75.79
   4   4   3 1453.76   70.18
  -4   4  -3 1395.63   69.98
  -4  -4  -3 1469.55   78.16
   4  -4   3 1513.19   74.46
  -4  -4  -3 1394.25   71.33
   4  -4   3 1440.85   76.04
   4  -4   3 1480.16   70.05
   4   4   4  312.60   17.81
  -4   4  -4  315.77   17.15
   4   4   4  287.11   22.82
  -4   4  -4  336.24   24.37
  -4   4  -4  316.81   22.35
   4   4   4  309.51   16.11
  -4   4  -4  298.46   15.85
   4  -4   4  294.51   23.20
  -4  -4  -4  294.35   23.61
   4  -4   4  312.53   16.05
   4  -4   4  328.03   21.04
  -4  -4  -4  295.57   17.00
   4   4   5  137.54   14.30
  -4   4  -5  144.85   16.33
  -4   4  -5  133.17   13.73
   4   4   5  132.39    8.12
  -4   4  -5  141.15    7.85
  -4  -4  -5  138.90    8.79
   4  -4   5  123.42   16.27
   4  -4   5  125.42   12.52
  -4  -4  -5  121.04   15.74
   4  -4   5  131.79    8.04
   4   4   6   -1.04    7.36
   4   4   6   -1.44    2.02
  -4   4  -6   -1.03    7.05
   4  -4   6    0.19    2.40
  -4  -4  -6    1.91    2.44
   4  -4   6    9.05   11.48
   4  -4   6    6.19    6.37
  -4   4  -7  695.02   46.50
   4   4   7  778.89   47.12
   4  -4   7  801.40   51.11
   4  -4   7  792.50   39.50
  -4  -4  -7  781.88   39.60
   4   4   8   86.21   13.01
  -4   4  -8   78.81   13.20
  -4  -4  -8   99.80    7.36
   4  -4   8   99.66    7.81
   4  -4   8  100.00   18.56
   4   4   9   54.12   12.07
   4   4   9   44.05    6.39
  -4   4  -9   54.68   12.07
   4  -4   9   47.45    6.18
   4  -4   9   68.78   11.93
   4  -4   9   33.71   17.14
   4   4  10   81.53    8.61
   4   4  10   67.07   14.07
   4  -4  10   72.73   21.69
   4  -4  10   83.51   13.24
  -4  -4 -10   81.74   11.58
   4   4  11  482.10   27.94
  -4   4 -11  472.68   36.38
   4   4  11  437.42   34.65
   4  -4  11  482.53   34.40
   4  -4  11  501.45   44.16
   4   4  12    0.57    4.48
  -4  -5  12  105.25   12.68
   4   5 -11  195.78   21.79
  -4   5  11  181.24   23.39
  -4   5  11  175.24   14.02
  -4  -5  11  177.20   31.65
  -4  -5  11  181.96   15.58
  -4   5  10    1.78   11.93
   4   5 -10    8.71   10.10
  -4   5  10    2.82    4.57
  -4  -5  10    6.88    7.27
  -4  -5  10   -2.32   18.97
   4   5  -9  621.87   40.16
  -4   5   9  655.00   42.95
  -4   5   9  527.47   32.25
  -4  -5   9  714.79   49.40
  -4  -5   9  622.76   34.01
  -4   5   8   23.98    5.04
   4   5  -8   38.15   10.35
  -4   5   8   22.57   10.49
  -4  -5   8   17.00   16.12
  -4  -5   8   22.64    6.04
  -4   5   7  652.84   36.91
   4   5  -7  627.68   42.31
  -4   5   7  672.34   43.47
   4  -5  -7  727.08   38.70
  -4  -5   7  738.75   37.94
  -4  -5   7  708.45   48.51
  -4   5   6    1.08    7.05
   4   5  -6   -2.01    7.44
  -4   5   6    3.80    3.57
  -4  -5   6    7.57   11.72
   4  -5  -6    0.72    0.99
  -4  -5   6    4.17    4.09
   4   5  -5  236.89   18.52
  -4   5   5  201.31   17.60
  -4   5   5  200.07   13.52
  -4  -5   5  232.64   14.65
  -4  -5   5  213.26   21.59
  -4   5   4  205.22   15.63
  -4   5   4  198.30   12.87
  -4   5   4  189.11   16.77
   4   5  -4  215.94   17.35
  -4  -5   4  212.37   17.34
  -4  -5   4  236.26   14.25
  -4  -5   4  174.64   19.16
  -4   5   3 2207.79  112.86
   4   5  -3 2134.37  108.07
  -4   5   3 2289.30  108.11
   4   5  -3 2211.45  111.92
  -4   5   3 2071.26  108.71
  -4   5   3 2175.37  110.97
  -4  -5   3 2335.00  112.02
  -4  -5   3 2255.41  108.74
  -4  -5   3 2255.53  115.42
  -4   5   2  643.16   31.43
  -4   5   2  586.67   36.22
  -4   5   2  643.57   33.47
  -4   5   2  616.70   35.11
  -4   5   2  593.94   29.96
  -4   5   2  574.93   29.65
   4   5  -2  676.17   34.94
  -4   5   2  687.09   31.76
   4   5  -2  535.65   37.61
   4   5  -2  620.40   32.11
  -4  -5   2  708.36   38.97
  -4  -5   2  693.06   35.41
  -4   5   1  480.37   23.67
  -4   5   1  427.13   24.05
  -4   5   1  422.09   21.77
   4   5  -1  476.69   25.80
   4   5  -1  476.77   31.69
  -4   5   1  450.27   27.40
   4   5  -1  436.97   23.93
   4   5  -1  413.95   29.32
  -4   5   1  452.67   23.22
  -4  -5   1  423.90   25.93
  -4  -5   1  452.93   28.60
   4   5   0    5.84    7.83
  -4   5   0   15.30    7.07
  -4   5   0    9.29    2.53
   4   5   0   10.84    3.49
  -4   5   0    6.83    1.56
   4   5   0   11.12    3.57
   4   5   0    5.71    7.58
  -4   5   0   16.93    4.89
  -4  -5   0    9.05    4.72
   4  -5   0    9.04    4.35
  -4  -5   0    7.37    3.03
  -4  -5   0   13.59    5.95
   4   5   1  394.53   21.95
  -4   5  -1  404.55   24.44
  -4   5  -1  407.96   27.21
  -4   5  -1  401.97   21.32
   4   5   1  362.68   22.41
  -4   5  -1  399.84   24.20
   4   5   1  452.41   30.51
  -4   5  -1  477.14   21.39
   4   5   1  321.67   26.01
  -4  -5  -1  375.14   23.04
  -4  -5  -1  377.28   25.76
  -4  -5  -1  391.26   22.54
   4  -5   1  407.32   25.23
  -4   5  -2  142.99    8.65
  -4   5  -2  135.40   12.53
  -4   5  -2  155.71   12.77
   4   5   2  144.14    8.58
  -4   5  -2  154.52   15.90
  -4   5  -2  152.99    8.68
   4   5   2  134.30   16.33
   4   5   2  123.53   16.03
   4   5   2  126.96    9.88
  -4  -5  -2  141.26   10.38
   4  -5   2  142.63    8.59
  -4  -5  -2  138.11   10.06
   4  -5   2  154.71   13.55
  -4   5  -3   81.98   10.53
   4   5   3   96.85    5.95
  -4   5  -3   96.49    6.47
   4   5   3   90.31   13.28
  -4   5  -3   95.32   11.49
  -4   5  -3   93.58    6.77
  -4   5  -3   97.21   13.36
   4   5   3  103.55   14.40
   4  -5   3   95.13    6.34
   4  -5   3  105.62    9.61
  -4  -5  -3  103.92    7.98
  -4  -5  -3  108.12   14.17
   4  -5   3   87.70   11.53
  -4   5  -4  140.92    8.68
   4   5   4  147.18   16.75
   4   5   4  126.36   15.79
  -4   5  -4  164.00    9.77
  -4   5  -4  145.12   17.00
  -4   5  -4  153.88   14.59
   4   5   4  147.23    8.49
   4  -5   4  153.90   13.02
   4  -5   4  150.42    8.81
   4  -5   4  121.96   15.19
  -4  -5  -4  149.43   10.17
  -4   5  -5  185.86   17.10
   4   5   5  157.55   18.37
   4   5   5  201.39   10.84
   4   5   5  143.62   17.07
   4  -5   5  176.32   15.44
  -4  -5  -5  177.76   11.86
   4  -5   5  198.51   19.97
   4  -5   5  194.37   11.09
  -4   5  -6    9.74    8.10
   4   5   6   21.25    9.26
   4   5   6   14.26    9.29
   4  -5   6    9.71    6.52
   4  -5   6   18.65    3.06
  -4  -5  -6   17.69    3.89
   4  -5   6   26.08   14.65
   4   5   7   -5.71    8.75
  -4   5  -7   10.76    8.68
   4   5   7   -1.18    7.89
   4  -5   7    9.50   15.06
   4  -5   7   -1.97    7.51
   4  -5   7    1.71    2.69
  -4  -5  -7    0.58    3.17
   4   5   8   -1.23    9.65
  -4   5  -8    2.61    9.08
   4  -5   8   14.22   16.73
   4  -5   8    4.18    3.23
   4  -5   8   27.04    8.69
   4   5   9   86.86    9.07
  -4   5  -9  104.97   15.26
   4   5   9   95.96   14.76
  -4  -5  -9   93.38   11.26
   4  -5   9   92.40   21.96
   4   5  10  187.37   20.65
   4   5  10  180.94   13.85
  -4   5 -10  176.66   21.37
   4  -5  10  192.17   27.39
   4   5  11   23.31    6.52
   4  -5  11   25.99   21.35
  -4   6  11   34.06   15.65
  -4  -6  11   62.97    9.45
   4   6 -10   -4.60   11.23
  -4   6  10    1.77    5.06
  -4   6  10   16.62   13.53
  -4  -6  10    7.91    6.48
  -4  -6  10   18.72   21.00
  -4   6   9   13.36   12.76
  -4   6   9   12.86    4.75
   4   6  -9   15.61   11.33
  -4  -6   9   14.15    6.54
  -4  -6   9   23.69   17.18
  -4   6   8   10.28   11.38
  -4   6   8    9.43    4.55
   4   6  -8   10.41    9.15
  -4  -6   8   12.65    6.10
  -4  -6   8   19.71   16.37
   4   6  -7  443.99   30.87
  -4   6   7  380.38   30.79
  -4   6   7  417.92   24.88
  -4  -6   7  432.31   25.43
  -4  -6   7  411.26   35.23
  -4   6   6    0.46    3.34
   4   6  -6    1.08    8.49
  -4   6   6   -3.54    7.73
  -4  -6   6   -7.06    4.75
  -4  -6   6    8.09   11.95
   4   6  -5 1383.31   69.99
  -4   6   5 1228.21   64.16
  -4   6   5 1171.34   69.52
  -4  -6   5 1275.12   64.74
  -4  -6   5 1339.95   74.09
  -4   6   4   40.08    8.67
   4   6  -4   34.34    8.56
  -4  -6   4   25.33   10.40
  -4  -6   4   41.11    5.80
  -4   6   3   59.36    9.81
  -4   6   3   54.43    9.26
  -4   6   3   56.19    7.59
   4   6  -3   62.32    9.20
  -4  -6   3   48.35    6.16
  -4  -6   3   56.63   11.63
  -4  -6   3   59.92    9.54
  -4   6   2  195.41   18.88
   4   6  -2  218.65   16.89
  -4   6   2  250.47   18.83
  -4   6   2  222.47   16.65
  -4   6   2  259.22   14.39
  -4  -6   2  232.13   14.98
  -4  -6   2  231.60   17.60
  -4  -6   2  234.47   20.57
  -4   6   1  572.45   30.03
   4   6  -1  585.30   32.66
  -4   6   1  598.56   30.47
  -4   6   1  540.65   31.52
  -4   6   1  617.28   35.73
   4   6  -1  648.96   40.60
  -4  -6   1  575.42   33.45
  -4  -6   1  581.35   36.62
  -4   6   0  185.27   12.95
  -4   6   0  205.94   17.42
   4   6   0  214.32   20.49
   4   6   0  193.18   13.02
  -4   6   0  192.48   11.77
  -4   6   0  206.47   14.25
  -4  -6   0  193.13   16.59
   4  -6   0  179.60   14.68
  -4  -6   0  216.13   14.70
  -4   6  -1   -0.21    2.29
  -4   6  -1   -1.21    5.54
  -4   6  -1    4.83    4.81
   4   6   1   -4.06    8.58
   4   6   1    2.53    2.63
  -4   6  -1    3.83    9.53
  -4   6  -1    1.20    2.53
  -4  -6  -1    2.00    3.01
  -4  -6  -1   -0.45    4.78
  -4  -6  -1   -0.87    6.09
   4  -6   1   -0.73    5.18
   4   6   2  400.54   30.86
  -4   6  -2  387.04   21.10
  -4   6  -2  415.15   25.18
  -4   6  -2  389.09   25.58
  -4   6  -2  433.47   29.93
   4   6   2  370.41   30.81
   4   6   2  374.82   20.53
  -4   6  -2  429.43   20.84
   4  -6   2  396.20   21.13
   4  -6   2  459.45   27.63
  -4  -6  -2  407.24   22.84
  -4  -6  -2  374.51   22.58
  -4   6  -3    5.49    6.21
   4   6   3   17.05    9.60
   4   6   3    2.80    8.18
   4   6   3    4.76    1.66
  -4   6  -3    1.89    2.28
   4  -6   3    2.45    2.19
   4  -6   3   -0.96    7.64
  -4  -6  -3    0.37    4.06
   4   6   4   12.09    9.97
  -4   6  -4   21.75    7.96
   4   6   4    6.94    8.57
   4  -6   4   20.88    3.05
  -4  -6  -4   19.48    4.56
   4  -6   4   26.10    9.64
   4   6   5  126.31   16.33
   4   6   5  113.98   15.71
  -4   6  -5  109.35   14.16
   4  -6   5  110.24   16.31
   4  -6   5  126.20    8.16
  -4  -6  -5  123.07    9.39
  -4   6  -6   31.90    9.74
   4   6   6   24.83   11.43
   4   6   6   17.20    9.27
   4  -6   6   14.27    7.26
   4  -6   6   17.57    3.27
   4  -6   6   19.92   13.35
  -4   6  -7  452.77   34.90
   4   6   7  473.01   35.66
   4   6   7  463.18   36.87
   4  -6   7  559.89   27.76
   4  -6   7  489.18   33.50
   4  -6   7  442.90   37.88
   4   6   8   86.30   14.96
  -4   6  -8  100.17   15.52
   4   6   8  107.11   17.84
   4  -6   8   89.82   19.53
   4  -6   8  111.98   14.03
  -4   6  -9   25.30   12.08
   4   6   9   28.21   11.21
   4   6   9   23.93   13.65
   4  -6   9   20.06    9.00
   4  -6   9   27.94   19.10
   4   6  10    2.06   14.87
  -4   6 -10    4.82   11.67
   4   6  10    3.78    5.06
   4  -6  10    6.69   18.75
  -4  -7  11  311.08   22.18
  -4   7  10   19.39   15.55
  -4  -7  10   40.03    8.40
  -4   7   9    7.27    5.19
  -4   7   9   17.55   11.99
   4   7  -9   31.39   11.93
  -4  -7   9   38.23   18.43
  -4  -7   9    8.48    5.95
  -4   7   8  197.00   14.77
  -4   7   8  163.29   21.35
   4   7  -8  220.65   21.94
  -4  -7   8  205.70   15.45
  -4  -7   8  193.77   26.36
  -4   7   7  195.48   21.45
  -4   7   7  203.26   15.21
   4   7  -7  236.26   21.77
  -4  -7   7  226.72   16.03
  -4   7   6  160.73   17.80
   4   7  -6  201.33   18.96
  -4   7   6  160.54   12.66
  -4  -7   6  171.42   13.24
  -4  -7   6  179.63   21.88
   4   7  -5    9.33    9.46
  -4   7   5   13.64    8.23
  -4  -7   5    9.01    4.78
  -4  -7   5   12.79   11.82
   4   7  -4 1507.30   80.44
  -4   7   4 1375.78   81.84
  -4  -7   4 1532.16   76.49
  -4  -7   4 1499.32   85.34
   4   7  -3   34.93    9.19
  -4   7   3   40.47   10.42
  -4  -7   3   41.26   11.86
  -4  -7   3   65.97    7.19
   4   7  -2  841.93   50.86
  -4   7   2  650.45   44.83
   4   7  -2  794.23   41.68
  -4  -7   2  697.46   39.01
  -4  -7   2  782.47   46.07
  -4  -7   2  686.23   41.52
   4   7  -1 1276.98   67.06
   4   7  -1 1406.15   77.18
  -4   7   1 1200.96   73.19
  -4   7   1 1324.71   69.92
  -4  -7   1 1314.48   66.19
  -4  -7   1 1277.22   71.82
  -4  -7   1 1286.28   67.97
  -4   7   0   10.12    3.80
   4   7   0   -3.12   10.85
   4   7   0    6.18    4.39
   4  -7   0    8.59    6.01
  -4  -7   0    1.04    6.60
  -4  -7   0    8.05    6.25
   4   7   1 1384.48   79.37
   4  -7   1 1395.34   73.00
  -4  -7  -1 1230.02   73.83
  -4  -7  -1 1437.88   69.94
  -4   7  -2  181.01   14.49
   4   7   2  182.64   21.69
   4   7   2  183.89   21.04
   4  -7   2  176.44   16.36
  -4  -7  -2  148.25   11.74
  -4  -7  -2  164.56   12.26
   4   7   3  155.79   20.11
   4   7   3  166.09   21.24
  -4   7  -3  184.38   15.83
   4  -7   3  168.73   10.76
  -4  -7  -3  159.41   11.86
   4  -7   3  193.08   18.14
  -4   7  -4 1967.22   99.87
   4   7   4 1868.05  105.06
   4   7   4 1857.79  104.86
   4  -7   4 1880.35   93.10
   4  -7   4 2047.27  102.61
   4   7   5   84.51   16.20
   4   7   5   87.43   15.18
  -4   7  -5   97.07   13.41
   4  -7   5   90.40    7.02
   4  -7   5  109.66   16.24
  -4   7  -6  638.36   40.07
   4   7   6  598.44   41.01
   4   7   6  570.91   42.94
   4  -7   6  567.69   42.08
   4  -7   6  605.42   31.47
   4   7   7  306.89   27.88
   4   7   7  372.88   31.11
  -4   7  -7  326.91   27.64
   4   7   8  487.82   40.20
  -4   7  -8  522.34   37.63
   4  -7   8  553.64   42.31
  -4   7  -9    3.12   11.82
   4  -7   9   24.49   16.72
  -4  -8  10   49.92    9.13
  -4   8   9   84.88   18.22
  -4  -8   9   90.50   10.51
   4   8  -8  348.06   28.57
  -4   8   8  305.40   29.36
  -4   8   8  310.43   21.07
  -4  -8   8  328.37   33.84
  -4  -8   8  332.51   21.79
  -4   8   7    4.15    4.89
   4   8  -7   -1.33   11.08
  -4   8   7   -3.12   10.44
  -4  -8   7   16.18   15.31
  -4  -8   7    1.27    5.53
  -4   8   6   10.07    4.98
   4   8  -6    7.26   10.18
  -4   8   6   -1.46    9.64
  -4  -8   6   11.17   14.41
  -4  -8   6    5.50    4.99
  -4   8   5  231.64   22.51
   4   8  -5  258.31   21.93
  -4  -8   5  228.96   16.87
  -4  -8   5  260.43   26.40
   4   8  -4  428.72   28.98
  -4  -8   4  461.48   34.38
  -4  -8   4  395.77   24.44
  -4   8   3  157.19   18.92
   4   8  -3  205.99   17.40
  -4  -8   3  201.18   14.68
  -4  -8   3  215.28   21.98
  -4   8   2   10.08    8.62
   4   8  -2   -1.87   12.28
  -4  -8   2   -6.61    9.02
  -4  -8   2   11.54    4.80
   4   8  -1   81.62   18.07
  -4   8   1   66.08   14.24
  -4  -8   1   74.97    8.41
  -4  -8   1   85.33   12.64
  -4  -8   1  113.04   12.04
   4   8   0  203.49   23.40
  -4  -8   0  171.80   17.40
  -4  -8   0  159.98   12.57
   4  -8   0  152.83   15.40
   4   8   1   30.07   14.59
  -4  -8  -1    8.06    4.63
   4  -8   1   13.45    7.78
  -4  -8  -1   15.18    8.36
   4   8   2   12.55   13.37
   4   8   2   17.53   12.91
   4  -8   2   14.61    8.91
   4   8   3  869.31   58.13
   4   8   3  882.52   58.27
   4  -8   3  881.08   52.67
   4   8   4  295.06   27.97
   4   8   4  259.85   27.96
   4  -8   4  285.42   16.97
   4  -8   4  355.45   27.15
   4   8   5   17.55   12.45
   4   8   5   -9.10   13.22
   4  -8   5    1.44   10.67
   4   8   6  496.01   41.72
  -4   8  -6  626.54   39.83
   4   8   6  538.55   40.59
   4  -8   6  616.96   42.67
  -4   8  -7   87.44   15.84
   4   8   7   66.14   16.73
   4  -8   7   86.87   17.66
  -4   8  -8   -4.56   11.78
   4  -8   8    1.89   15.89
  -4  -9   8   16.35    6.67
  -4   9   7   23.90   12.33
  -4  -9   7   18.43    6.74
  -4   9   6   21.08   11.99
  -4   9   6   32.00    6.38
  -4  -9   6   51.07   17.58
  -4  -9   6   37.93    7.14
  -4   9   5    4.75    9.13
  -4  -9   5    7.56    5.45
  -4   9   4  124.17   17.72
  -4  -9   4  164.01   13.23
  -4  -9   4  149.25   20.60
  -4   9   3   11.04    9.79
   4   9  -3    4.39   14.53
  -4  -9   3    4.69   11.18
  -4  -9   3    7.15    5.79
   4   9  -2  489.56   39.81
  -4   9   2  424.56   34.54
  -4  -9   2  398.27   33.00
  -4  -9   2  450.55   26.70
  -4   9   1   56.00   14.28
   4   9  -1   65.72   18.51
  -4  -9   1   55.05    7.73
  -4  -9   1   48.48   12.22
   4   9   0   12.13   14.20
  -4  -9   0   14.74   10.18
  -4  -9   0   17.51    5.97
   4  -9   0   25.28    8.84
   4   9   1    7.96   14.60
   4   9   1   13.66   14.63
   4  -9   1   15.24    8.29
  -4  -9  -1   21.39    5.96
   4   9   2  199.22   25.67
   4   9   2  159.35   24.42
   4  -9   2  179.32   18.32
   4   9   3  355.08   34.70
   4   9   3  387.52   35.50
   4  -9   3  388.85   29.34
   4   9   4  108.54   20.23
   4   9   4   91.89   19.41
   4  -9   4  133.02   17.22
   4   9   5   91.33   19.05
   4  -9   5   96.79   16.16
   4  -9   6  479.43   38.32
   4  -9   7   -1.84   13.12
  -4 -10   6    4.90    6.07
  -4 -10   5    2.04    5.91
  -4  10   4  118.19   19.81
  -4 -10   4  184.59   14.93
  -4  10   3    8.86   11.51
   4  10  -3    4.84   15.69
  -4 -10   3   13.14    6.18
   4  10  -2  524.27   43.55
  -4 -10   2  470.75   28.50
   4  10  -1   84.82   21.41
  -4  10   1   42.73   15.21
  -4 -10   1   74.56    9.38
  -4  10   0   47.08   15.83
   4  10   0   56.49   18.20
  -4 -10   0   55.38    8.63
   4  10   1   69.05   20.11
   4  10   1  103.66   22.00
   4 -10   1   50.30   11.71
   4  10   2  739.89   54.02
   4  10   2  733.36   54.42
   4 -10   2  649.43   44.32
   4 -10   3  234.82   23.09
   4 -10   4    2.96   10.49
   4 -10   5  116.44   18.27
   4 -11   1  317.64   27.29
   4 -11   2  117.11   17.01
   5   0 -13  -13.39   10.13
  -5   0  13    0.66    5.75
   5   0 -12  640.54   42.21
  -5   0  12  653.64   37.13
  -5   0  12  680.58   52.55
   5   0 -11    3.43    9.11
  -5   0  11    4.47    4.79
  -5   0  11  -16.58   17.09
   5   0 -10   40.65    9.85
  -5   0  10   32.57    7.51
  -5   0  10   26.04   14.17
  -5   0  10   34.49    6.02
  -5   0   9    2.47    5.29
   5   0  -9    0.94    7.47
  -5   0   9   -6.62   11.50
  -5   0   8  222.26   22.26
   5   0  -8  179.87   16.33
  -5   0   8  197.20   14.27
   5   0  -8  210.88   16.62
  -5   0   7   -0.73    2.53
  -5   0   7    1.38    3.92
   5   0  -7    4.04    8.34
  -5   0   7    0.80    7.17
   5   0  -7    0.67    6.06
   5   0  -7    6.00    5.90
  -5   0   7    2.52    8.90
   5   0  -6    4.90    5.20
   5   0  -6   -0.87    7.12
  -5   0   6   -4.27    8.08
  -5   0   6    2.91    2.35
   5   0  -6   -1.97    5.09
  -5   0   6    1.37    6.40
   5   0  -6    2.65    2.69
  -5   0   5   -0.56    2.25
   5   0  -5    2.01    2.39
  -5   0   5    7.13    6.06
   5   0  -5   -3.98    4.68
  -5   0   5  -11.47    8.26
   5   0  -5   -2.05    3.90
   5   0  -5    2.87    6.00
   5   0  -4 3843.43  188.18
   5   0  -4 3896.41  188.98
   5   0  -4 3837.70  191.12
  -5   0   4 3860.93  190.81
   5   0  -4 4012.64  190.95
  -5   0   4 3994.59  193.13
  -5   0   4 3988.19  188.52
   5   0  -3    1.03    2.57
  -5   0   3    4.24    5.23
  -5   0   3    4.42    4.62
  -5   0   3    0.40    1.94
   5   0  -3   -0.35    2.42
  -5   0   2 3927.51  189.37
  -5   0   2 4094.21  187.54
  -5   0   2 3573.06  188.90
   5   0  -2 4166.10  189.66
   5   0  -2 3657.96  188.65
  -5   0   1    1.07    3.24
   5   0  -1    1.66    1.67
   5   0  -1   -2.41    4.40
  -5   0   1    2.36    2.72
   5   0  -1    0.82    3.13
  -5   0   1    2.33    1.71
  -5   0   1    0.34    4.77
   5   0  -1    0.70    2.34
   5   0   0 1203.74   58.63
   5   0   0 1236.40   61.80
  -5   0   0 1166.57   59.46
  -5   0   0 1240.15   61.79
   5   0   0 1216.00   58.44
   5   0   0 1155.53   59.14
  -5   0   0 1247.40   58.56
   5   0   1   -0.15    1.51
  -5   0  -1    3.50    5.82
  -5   0  -1    0.70    1.12
   5   0   1   -0.17    1.63
  -5   0  -1   -1.44    3.57
   5   0   1   -0.21    2.66
  -5   0  -1   -0.87    2.11
  -5   0  -2  941.70   46.73
   5   0   2  951.87   46.76
  -5   0  -2  942.77   47.44
   5   0   2 1056.41   47.63
  -5   0  -2  973.93   49.15
  -5   0  -2  989.25   51.40
   5   0   2  959.20   49.33
  -5   0  -3    4.42    6.21
   5   0   3    0.18    1.59
  -5   0  -3    1.21    1.83
  -5   0  -3    1.77    4.71
   5   0   3    0.20    1.39
   5   0   3   -1.84    4.89
   5   0   3   -3.05    4.20
  -5   0  -4 5599.53  262.17
   5   0   4 5432.62  258.41
   5   0   4 5212.61  262.41
  -5   0  -4 5815.00  263.93
   5   0   4 5310.21  257.65
   5   0   4 5358.13  263.19
   5   0   5    1.02    1.62
   5   0   5   -4.59    5.74
  -5   0  -5   -0.86    7.10
   5   0   5    1.24    1.95
  -5   0  -5   -5.76    6.43
   5   0   5   -1.65    5.86
   5   0   6   39.98    7.75
  -5   0  -6   57.10    5.89
  -5   0  -6   46.71    9.26
   5   0   6   42.66    8.61
   5   0   6   41.17    3.84
   5   0   6   40.15    4.38
   5   0   7   -1.04    6.65
   5   0   7    1.82    5.97
   5   0   7    0.23    2.07
   5   0   8  755.13   47.77
   5   0   8  809.90   40.09
   5   0   9   -7.25   10.26
   5   0   9    1.27    8.74
   5   0   9   -3.05    3.03
  -5   0 -10   26.82   10.82
   5   0  10   12.39    3.64
   5   0  10   26.95   13.72
   5   0  10    9.60   10.07
   5   0  11   -4.36   10.64
  -5   0 -11   12.50   10.51
   5   0  11    2.07   14.54
   5   0  11    3.05    3.27
  -5   0 -12  352.48   30.59
   5   0  12  344.56   30.59
   5   0  12  392.47   22.37
   5   0  12  358.68   36.64
   5  -1 -14   55.85   13.46
   5   1 -13   48.58   14.17
   5  -1 -13   74.42   13.28
  -5  -1  13   81.92   10.21
  -5   1  12    9.00   16.37
  -5   1  12   15.20    5.74
   5   1 -12    6.65   10.18
  -5  -1  12   45.00   19.67
  -5  -1  12   15.07    5.98
   5  -1 -12   19.49    9.42
   5   1 -11    9.86   10.62
  -5   1  11   -0.55    4.67
  -5   1  11    2.03   14.60
  -5  -1  11  -10.73   16.99
  -5  -1  11    1.72    4.91
   5  -1 -11    5.26    7.64
  -5   1  10    5.39   13.18
   5   1 -10   10.16    9.19
   5  -1 -10    0.96    7.83
  -5  -1  10    1.57    4.42
  -5  -1  10    9.67   13.70
   5   1  -9  431.49   30.72
  -5   1   9  464.42   36.13
  -5   1   9  477.06   27.56
   5  -1  -9  467.64   29.75
  -5  -1   9  449.72   26.51
  -5  -1   9  562.13   39.20
   5  -1  -9  458.54   29.71
  -5   1   8   14.51    3.94
  -5   1   8   22.92    5.44
  -5   1   8   -6.76   10.10
   5   1  -8   18.01    8.15
   5   1  -8   19.51    7.65
  -5  -1   8   27.52   12.71
   5  -1  -8   19.14    7.30
   5  -1  -8   18.39    7.07
  -5   1   7   77.03   10.45
   5   1  -7   72.67    9.99
  -5   1   7   72.61   11.92
  -5   1   7   68.13    7.08
   5   1  -7   68.31    9.66
  -5   1   7   77.55    6.69
   5  -1  -7   79.28    9.51
  -5  -1   7   68.02   13.41
   5  -1  -7   77.42    9.15
   5  -1  -7   82.35   11.41
   5   1  -6 1289.48   67.34
   5   1  -6 1120.65   68.03
   5   1  -6 1317.00   64.77
  -5   1   6 1293.43   64.97
  -5   1   6 1282.41   64.93
   5   1  -6 1212.62   68.33
  -5   1   6 1285.06   67.74
  -5   1   6 1143.74   69.22
  -5  -1   6 1295.92   69.07
  -5  -1   6 1342.03   73.12
  -5  -1   6 1311.57   65.22
   5  -1  -6 1395.82   65.23
   5  -1  -6 1477.24   70.42
   5  -1  -6 1341.64   66.58
   5  -1  -6 1332.85   67.56
   5   1  -5  102.46   11.01
   5   1  -5  110.17    7.76
   5   1  -5  111.80    9.68
  -5   1   5   82.12   10.12
  -5   1   5  102.23    7.62
  -5   1   5  117.17   10.68
   5  -1  -5  115.02    9.91
  -5  -1   5  130.70   14.70
  -5  -1   5  122.47    8.27
   5  -1  -5  122.33   11.78
  -5  -1   5  137.51   12.10
   5  -1  -5  117.50    8.99
  -5   1   4  678.18   33.70
   5   1  -4  666.97   34.96
   5   1  -4  620.29   33.53
  -5   1   4  661.52   35.81
   5   1  -4  699.76   38.45
  -5   1   4  541.72   35.46
  -5  -1   4  698.86   39.36
   5  -1  -4  660.95   33.98
   5  -1  -4  676.78   35.40
  -5  -1   4  669.34   36.87
   5  -1  -4  702.43   36.78
  -5  -1   4  691.39   34.13
  -5   1   3  299.91   15.28
  -5   1   3  224.44   16.33
  -5   1   3  258.67   16.57
   5   1  -3  283.84   15.25
   5   1  -3  267.78   17.72
   5   1  -3  280.20   19.00
   5  -1  -3  290.65   17.25
  -5  -1   3  289.66   15.66
  -5  -1   3  277.45   19.35
   5  -1  -3  272.06   16.41
  -5  -1   3  278.68   17.76
   5  -1  -3  281.81   14.81
   5   1  -2  572.22   32.59
  -5   1   2  624.01   29.55
  -5   1   2  510.48   30.13
   5   1  -2  614.06   31.75
  -5   1   2  573.94   30.78
   5  -1  -2  589.41   30.38
  -5  -1   2  588.70   31.80
  -5  -1   2  624.30   30.09
  -5  -1   2  612.90   32.67
   5  -1  -2  571.41   30.40
   5  -1  -2  566.17   29.42
   5   1  -1 1459.61   74.69
  -5   1   1 1465.71   73.44
   5   1  -1 1500.98   74.28
  -5   1   1 1505.59   73.68
  -5   1   1 1551.47   72.47
   5  -1  -1 1392.83   72.95
  -5  -1   1 1471.10   74.46
  -5  -1   1 1496.24   74.40
  -5  -1   1 1538.41   73.10
   5  -1  -1 1532.11   72.40
   5   1   0 1569.09   73.90
  -5   1   0 1493.07   75.71
  -5   1   0 1474.06   74.12
  -5   1   0 1605.28   73.27
   5   1   0 1527.94   75.07
   5   1   0 1590.18   74.72
   5  -1   0 1515.60   75.34
  -5  -1   0 1520.18   74.73
  -5  -1   0 1540.07   77.80
   5  -1   0 1447.97   73.12
  -5  -1   0 1551.70   73.95
  -5  -1   0 1446.62   74.98
  -5   1  -1  127.49    8.06
   5   1   1  154.49    8.24
   5   1   1  141.08   10.31
  -5   1  -1  155.58    8.11
  -5   1  -1  143.23    6.87
   5   1   1  146.10    9.02
  -5   1  -1  155.71   11.17
   5   1   1  149.13    7.95
   5  -1   1  149.67   10.18
  -5  -1  -1  155.26   13.24
  -5  -1  -1  157.24    7.97
   5  -1   1  114.03    6.76
  -5   1  -2 3115.61  144.86
   5   1   2 3051.96  144.68
   5   1   2 2917.50  149.10
   5   1   2 2977.46  147.40
   5   1   2 2939.78  144.75
  -5   1  -2 2897.15  146.22
  -5   1  -2 3155.22  148.32
   5  -1   2 3140.25  144.99
  -5  -1  -2 3043.29  144.66
   5  -1   2 2630.73  147.55
  -5  -1  -2 3044.43  150.34
   5  -1   2 2923.34  146.75
  -5  -1  -2 3042.26  148.00
   5   1   3  882.83   44.37
  -5   1  -3  971.08   49.22
   5   1   3  849.75   49.08
   5   1   3  861.54   47.89
  -5   1  -3  949.00   47.66
  -5   1  -3  923.40   44.73
   5  -1   3  845.02   47.72
  -5  -1  -3  848.29   44.57
  -5  -1  -3  944.16   50.52
   5  -1   3  905.61   44.77
   5  -1   3  857.99   43.41
  -5  -1  -3  975.38   48.67
  -5   1  -4 1215.72   62.96
   5   1   4 1159.47   62.77
  -5   1  -4 1480.69   58.76
   5   1   4 1090.18   57.55
   5   1   4 1150.36   57.49
   5   1   4 1246.36   62.54
  -5   1  -4 1348.34   62.65
  -5  -1  -4 1151.57   57.59
  -5  -1  -4 1201.92   62.41
   5  -1   4 1102.72   57.85
   5  -1   4 1074.59   61.88
  -5  -1  -4 1104.77   63.22
   5   1   5  895.84   48.21
   5   1   5  836.19   41.85
   5   1   5  819.45   41.94
  -5   1  -5  921.51   48.54
   5   1   5  813.81   47.42
  -5   1  -5  979.85   42.70
  -5   1  -5  891.08   47.23
  -5  -1  -5  863.90   48.65
   5  -1   5  739.22   46.97
  -5  -1  -5  897.04   47.67
  -5  -1  -5  844.85   41.85
   5  -1   5  789.61   42.18
   5  -1   5  814.82   40.96
   5  -1   5  786.32   47.19
  -5   1  -6 1181.62   59.93
   5   1   6 1102.11   60.30
   5   1   6 1003.89   52.79
   5   1   6 1022.26   58.76
   5   1   6 1016.50   52.63
   5   1   6 1073.01   52.87
   5  -1   6 1080.63   51.90
  -5  -1  -6 1126.12   52.90
   5  -1   6 1012.71   59.85
  -5  -1  -6 1102.84   59.40
   5  -1   6 1021.31   58.79
   5   1   7  158.95   16.71
   5   1   7  144.07    9.37
   5   1   7  137.49   14.80
   5  -1   7  116.11   14.35
   5  -1   7  136.03    8.51
   5  -1   7  145.44   17.39
   5   1   8 1463.50   90.78
   5   1   8 1643.18   91.30
   5   1   8 1730.95   83.82
   5  -1   8 1625.90   91.33
   5  -1   8 1726.76   83.17
   5  -1   8 1684.87   94.44
   5   1   9  415.90   30.50
   5   1   9  402.20   22.56
   5  -1   9  406.11   22.10
   5  -1   9  352.55   32.66
   5  -1   9  353.54   29.38
   5   1  10  475.83   39.72
   5   1  10  628.71   33.02
  -5   1 -10  565.07   40.73
   5   1  10  683.84   42.64
   5  -1  10  585.23   40.80
  -5  -1 -10  566.02   39.78
   5  -1  10  589.74   45.83
   5  -1  10  638.34   32.63
  -5   1 -11    1.45    9.62
   5   1  11    4.43    9.89
   5   1  11   15.72   13.11
   5   1  11   10.75    3.91
   5  -1  11    8.57   16.09
  -5  -1 -11    1.33    9.73
   5  -1  11    9.93    9.95
   5  -1  11    5.90    3.66
   5   1  12   12.23    4.29
   5   1  12    7.78   11.41
   5   1  12    2.17   15.12
  -5   1 -12    1.54   11.32
   5  -1  12    5.97   11.22
   5  -1  12   23.67   18.05
  -5  -1 -12    2.82   10.08
  -5  -1 -13    5.97   10.76
  -5  -2  13    4.92    6.52
  -5   2  12  733.60   53.69
   5   2 -12  727.94   47.32
  -5   2  12  696.27   39.93
   5  -2 -12  713.10   43.83
  -5  -2  12  792.37   57.17
  -5  -2  12  730.31   40.71
  -5   2  11   73.89   17.64
   5   2 -11   77.77   14.22
  -5  -2  11   55.63   19.84
   5  -2 -11   68.74   11.44
  -5  -2  11   78.13    9.32
  -5   2  10  153.76   20.03
   5   2 -10  155.16   17.44
  -5  -2  10  145.24   11.90
  -5  -2  10  187.57   25.39
   5  -2 -10  125.07   13.87
   5   2  -9   27.70    9.27
  -5   2   9   41.75   11.48
  -5   2   9   24.65    5.21
  -5  -2   9   29.03   16.17
  -5  -2   9   36.86    5.86
   5  -2  -9   44.40    9.50
   5  -2  -9   41.65    8.27
  -5   2   8   65.26    6.95
  -5   2   8   98.71   11.42
  -5   2   8   64.10   10.55
  -5   2   8   89.48    8.26
  -5  -2   8   80.76    7.82
   5  -2  -8   85.01    9.90
  -5  -2   8   77.50   16.44
   5  -2  -8   90.67   10.15
  -5   2   7  354.40   21.77
  -5   2   7  410.92   25.29
  -5   2   7  377.09   21.95
   5   2  -7  382.01   25.55
   5  -2  -7  388.84   27.13
   5  -2  -7  428.97   24.10
  -5  -2   7  461.04   32.69
   5  -2  -7  404.34   24.24
   5   2  -6   85.51    6.82
  -5   2   6   85.64    6.73
   5   2  -6   78.12   10.28
   5   2  -6  101.26   12.76
  -5   2   6   96.72   11.24
  -5   2   6   79.66    9.27
   5   2  -6   78.07    9.40
  -5   2   6   84.92    6.96
   5  -2  -6  101.74    8.48
  -5  -2   6   79.12   13.73
   5  -2  -6   73.41    8.23
   5  -2  -6   92.69   11.55
  -5   2   5 3001.03  143.77
   5   2  -5 2892.20  144.13
   5   2  -5 2940.34  148.23
  -5   2   5 2903.96  141.79
  -5   2   5 2916.69  146.19
   5   2  -5 2768.69  141.65
  -5   2   5 2930.17  140.82
   5   2  -5 2902.19  145.72
   5  -2  -5 2933.89  143.04
  -5  -2   5 2885.78  145.95
   5  -2  -5 3122.45  141.99
  -5  -2   5 2959.56  149.22
   5  -2  -5 2891.08  145.41
  -5  -2   5 2940.07  142.42
   5   2  -4 2212.83  114.34
  -5   2   4 2278.53  110.31
  -5   2   4 2413.96  112.83
   5   2  -4 2206.20  110.46
   5   2  -4 2226.64  112.44
  -5   2   4 2265.12  108.89
   5   2  -4 2144.62  108.82
   5  -2  -4 2254.50  111.82
  -5  -2   4 2239.66  112.59
   5  -2  -4 2284.85  109.11
  -5  -2   4 2288.53  109.50
  -5  -2   4 2449.79  116.06
   5  -2  -4 2326.28  109.82
   5  -2  -4 2139.31  108.04
  -5   2   3 5582.61  276.89
  -5   2   3 5535.53  275.50
   5   2  -3 5515.41  274.79
   5   2  -3 5561.35  279.40
   5   2  -3 5808.78  277.86
  -5   2   3 5759.63  274.60
  -5  -2   3 5570.88  277.63
  -5  -2   3 5985.37  279.97
  -5  -2   3 5855.12  275.34
   5  -2  -3 5933.94  276.89
   5  -2  -3 5914.23  274.76
   5  -2  -3 5789.08  275.03
  -5   2   2  768.78   37.74
   5   2  -2  762.17   38.19
   5   2  -2  700.43   41.69
  -5   2   2  706.67   38.50
   5   2  -2  769.18   40.64
  -5   2   2  748.48   39.06
  -5  -2   2  773.83   38.61
   5  -2  -2  792.16   37.92
   5  -2  -2  757.69   39.51
  -5  -2   2  710.98   40.18
  -5  -2   2  779.53   41.82
  -5   2   1   19.62    2.15
  -5   2   1   22.18    2.99
  -5   2   1   12.13    2.74
  -5   2   1   15.52    2.95
   5   2  -1   20.22    6.75
  -5   2   1   23.21    3.33
   5   2  -1   23.02    4.20
  -5  -2   1   15.94    4.97
  -5  -2   1   18.78    3.21
   5  -2  -1   15.68    2.09
   5   2   0 2115.90  107.78
   5   2   0 2199.37  111.05
  -5   2   0 2300.87  106.02
  -5   2   0 2191.87  104.72
  -5   2   0 2124.49  106.61
  -5   2   0 2143.11  105.34
   5   2   0 2253.71  106.61
  -5  -2   0 2363.78  110.36
  -5  -2   0 2255.02  105.95
  -5  -2   0 2191.23  107.53
   5  -2   0 2198.77  106.61
   5  -2   0 2102.85  105.12
   5   2   1   23.02    6.11
   5   2   1   11.98    6.43
   5   2   1    9.22    4.05
  -5   2  -1    5.31    4.69
   5   2   1    9.35    2.42
  -5   2  -1   12.29    4.11
  -5   2  -1    8.76    1.90
   5   2   1   12.36    2.61
   5  -2   1    7.35    3.83
   5  -2   1    9.99    1.84
  -5  -2  -1    9.50    3.20
  -5  -2  -1    2.75    6.73
  -5  -2  -1    8.86    2.28
   5  -2   1   14.36    3.52
   5   2   2  380.60   26.30
   5   2   2  410.16   20.84
   5   2   2  471.75   25.51
  -5   2  -2  438.96   20.89
  -5   2  -2  407.83   24.02
   5   2   2  430.37   23.17
   5   2   2  391.97   21.11
  -5   2  -2  351.73   22.46
  -5  -2  -2  386.36   21.43
  -5  -2  -2  407.33   26.80
  -5  -2  -2  386.39   20.98
   5  -2   2  401.34   23.34
   5  -2   2  386.60   23.77
   5   2   3  712.58   43.59
   5   2   3  762.48   38.31
   5   2   3  717.46   38.52
  -5   2  -3  789.23   42.63
   5   2   3  731.40   42.39
  -5   2  -3  898.54   41.35
  -5   2  -3  946.24   39.37
   5  -2   3  696.34   42.03
   5  -2   3  767.73   42.39
  -5  -2  -3  754.23   43.79
  -5  -2  -3  744.96   45.01
  -5  -2  -3  718.21   38.52
  -5   2  -4 4620.26  228.62
   5   2   4 4747.79  224.76
  -5   2  -4 4970.30  224.96
   5   2   4 4594.72  230.37
   5   2   4 4552.53  224.30
  -5   2  -4 4872.42  229.84
   5   2   4 4447.91  229.41
   5  -2   4 4584.80  229.96
  -5  -2  -4 4643.39  224.51
  -5  -2  -4 4568.70  230.25
   5   2   5  839.95   48.52
   5   2   5  858.38   43.04
   5   2   5  814.18   42.58
   5   2   5  870.27   48.95
  -5   2  -5  885.43   43.12
  -5   2  -5  911.79   49.23
  -5   2  -5  897.63   48.57
  -5  -2  -5  936.93   49.71
   5  -2   5  875.81   49.77
  -5  -2  -5  848.25   42.60
  -5   2  -6  196.68   17.43
   5   2   6  173.74   16.06
   5   2   6  147.88    9.94
   5   2   6  184.33   16.95
   5   2   6  172.80   10.78
   5  -2   6  168.48    9.26
   5  -2   6  130.48   14.79
  -5  -2  -6  169.10   10.15
   5  -2   6  155.62   17.14
   5   2   7  697.12   45.03
   5   2   7  735.38   39.22
   5   2   7  757.87   38.93
   5   2   7  781.85   39.45
   5   2   7  802.64   47.73
   5  -2   7  750.85   45.43
   5  -2   7  772.11   48.09
   5  -2   7  768.97   37.95
   5   2   8   19.43    4.12
   5   2   8   25.52   11.01
   5   2   8   18.87    8.54
   5  -2   8   17.50    3.12
   5  -2   8   13.84   11.94
   5  -2   8   17.96    8.74
   5   2   9  733.62   50.59
   5   2   9  857.18   43.99
   5   2   9  827.70   53.83
   5  -2   9  832.13   51.13
   5  -2   9  852.49   42.90
   5  -2   9  864.76   56.24
   5   2  10  683.12   50.17
   5   2  10  737.30   49.12
   5   2  10  796.27   41.26
   5  -2  10  748.26   54.25
   5  -2  10  793.09   40.31
   5  -2  10  748.13   48.61
  -5   2 -11  306.03   27.13
   5   2  11  310.75   27.48
   5   2  11  321.07   18.63
   5  -2  11  290.65   25.91
  -5  -2 -11  281.49   24.52
   5  -2  11  325.06   33.61
   5   2  12  255.32   16.57
  -5   2 -12  243.43   25.22
   5   2  12  194.89   24.57
   5   2  12  285.44   26.30
   5  -2  12  238.78   23.99
  -5  -2 -12  267.19   23.63
   5  -2  12  240.90   31.37
   5   2  13   33.98    6.16
  -5  -2 -13   16.99   10.98
   5   3 -12  188.55   20.85
  -5   3  12  162.64   23.55
  -5  -3  12  151.74   13.98
  -5  -3  12  172.68   29.89
  -5   3  11   84.52   15.51
   5   3 -11   98.38   15.99
   5  -3 -11   84.96   11.29
  -5  -3  11   84.08   10.07
  -5  -3  11  103.33   24.73
  -5   3  10   -3.84    8.82
  -5   3  10    6.19    4.00
   5  -3 -10   -0.76    6.29
  -5  -3  10   10.46   18.36
  -5  -3  10    3.44    5.64
  -5   3   9  742.07   41.19
  -5   3   9  691.39   47.10
  -5  -3   9  847.99   55.42
  -5  -3   9  832.35   42.30
   5  -3  -9  755.75   42.97
  -5   3   8   11.92    3.87
  -5   3   8   29.74    9.77
   5   3  -8    9.74    8.22
  -5  -3   8   10.15   14.24
   5  -3  -8   16.41    6.79
  -5  -3   8   21.11    5.55
   5  -3  -8   11.19    5.62
  -5   3   7  374.50   22.36
   5   3  -7  406.06   27.64
  -5   3   7  389.25   28.44
   5  -3  -7  400.19   23.87
   5  -3  -7  413.77   23.71
  -5  -3   7  410.62   23.32
  -5  -3   7  428.68   33.59
  -5   3   6 1325.82   65.94
  -5   3   6 1327.09   71.65
  -5   3   6 1356.31   67.48
  -5   3   6 1260.18   64.73
   5   3  -6 1283.61   70.71
   5  -3  -6 1307.31   66.43
   5  -3  -6 1401.85   66.64
  -5  -3   6 1421.16   76.27
   5  -3  -6 1358.16   71.54
  -5   3   5 3052.42  139.82
  -5   3   5 2810.91  135.38
   5   3  -5 2728.23  141.52
   5   3  -5 2895.53  139.34
   5   3  -5 2723.21  134.29
  -5   3   5 2679.86  132.76
   5   3  -5 2695.17  137.00
  -5   3   5 2709.37  134.34
   5  -3  -5 2885.05  134.66
   5  -3  -5 2835.54  133.99
  -5  -3   5 2930.19  143.54
   5  -3  -5 2684.82  138.83
  -5  -3   5 2796.07  138.99
   5   3  -4 6041.13  293.01
   5   3  -4 5853.70  291.03
  -5   3   4 5934.99  290.85
  -5   3   4 6310.49  291.61
  -5   3   4 6280.49  294.53
   5   3  -4 5842.62  297.21
   5   3  -4 5987.04  295.08
  -5  -3   4 6451.64  298.55
   5  -3  -4 6163.26  294.95
  -5  -3   4 5807.84  291.60
   5  -3  -4 6292.18  290.61
  -5   3   3  277.39   18.58
   5   3  -3  257.42   22.02
  -5   3   3  287.35   16.61
   5   3  -3  281.04   16.58
   5   3  -3  312.76   19.82
  -5   3   3  304.92   16.38
  -5  -3   3  314.63   21.98
   5  -3  -3  304.08   20.01
  -5  -3   3  299.86   17.22
   5  -3  -3  301.72   15.67
   5   3  -2 3452.35  167.09
  -5   3   2 3480.65  166.73
   5   3  -2 3477.39  171.73
  -5   3   2 3451.24  166.54
  -5   3   2 3612.71  167.81
  -5   3   2 3327.96  168.52
   5   3  -2 3489.26  169.67
   5  -3  -2 3422.80  165.76
  -5  -3   2 3586.91  171.78
  -5  -3   2 3489.50  169.60
  -5  -3   2 3502.99  167.57
   5   3  -1   81.99    6.46
  -5   3   1   83.88    5.80
   5   3  -1   89.60   10.59
   5   3  -1   85.37   11.23
  -5   3   1   94.03    7.55
  -5   3   1   75.31    5.44
  -5   3   1   71.47    7.21
  -5   3   1   74.09    5.32
   5   3  -1   70.07    7.38
   5  -3  -1   80.86    4.87
  -5  -3   1   79.57    6.21
  -5  -3   1   90.25    9.31
  -5  -3   1   70.91    8.06
   5   3   0    7.18    3.22
  -5   3   0    2.81    1.61
   5   3   0    7.69    6.28
  -5   3   0    5.09    1.63
  -5   3   0    4.59    3.60
   5   3   0    9.76    7.27
  -5   3   0    8.54    5.17
  -5   3   0    5.17    1.50
   5  -3   0    3.37    1.36
   5  -3   0    3.98    2.62
  -5  -3   0    5.01    4.38
  -5  -3   0    9.06    2.47
  -5  -3   0    5.67    4.46
   5  -3   0    3.48    2.51
  -5   3  -1  121.25    7.32
  -5   3  -1  119.85   10.05
   5   3   1  126.14    8.21
   5   3   1  121.90   10.72
   5   3   1  128.69   13.75
  -5   3  -1  121.30    6.64
  -5   3  -1  127.63   10.88
   5  -3   1  113.25    9.03
   5  -3   1  131.75    9.32
  -5  -3  -1  122.54    8.08
  -5  -3  -1  123.53   10.15
  -5  -3  -1  130.05   13.39
   5  -3   1  125.90    7.43
  -5  -3  -1  126.56    9.35
   5   3   2  472.14   28.94
   5   3   2  453.83   26.12
   5   3   2  462.97   30.44
   5   3   2  472.04   23.08
  -5   3  -2  528.65   23.37
  -5   3  -2  478.99   26.90
  -5   3  -2  422.58   21.70
   5   3   2  467.99   23.74
  -5   3  -2  462.83   27.02
   5  -3   2  467.67   26.20
  -5  -3  -2  453.04   24.12
  -5  -3  -2  438.95   29.06
   5  -3   2  441.21   23.13
  -5  -3  -2  455.18   23.66
   5  -3   2  454.61   25.99
  -5   3  -3  922.26   45.29
   5   3   3  908.15   40.53
  -5   3  -3  949.38   45.30
  -5   3  -3 1071.08   40.60
   5   3   3  957.28   43.79
   5   3   3  903.76   47.45
   5   3   3  919.21   46.47
   5   3   3  916.03   39.56
   5  -3   3  938.23   45.34
   5  -3   3  890.01   43.90
   5  -3   3  920.83   40.37
  -5  -3  -3  901.42   40.56
  -5  -3  -3  854.53   40.49
   5   3   4   32.05    8.02
   5   3   4   44.11    4.60
  -5   3  -4   22.71    7.71
  -5   3  -4   27.57    8.18
   5   3   4   41.06    3.62
  -5   3  -4   50.00    4.51
  -5   3  -4   36.83    2.54
   5   3   4   56.69    8.97
  -5  -3  -4   41.93    4.15
   5  -3   4   46.64    7.68
  -5  -3  -4   58.48   11.79
  -5  -3  -4   37.07    9.83
   5  -3   4   53.30    9.74
  -5   3  -5   -3.71    8.24
   5   3   5    4.84    6.79
   5   3   5   11.59    6.84
   5   3   5    1.46    1.85
  -5   3  -5    5.09    1.47
  -5   3  -5   21.47    5.75
   5   3   5    4.16    2.90
  -5  -3  -5    7.63    2.63
  -5  -3  -5    9.96    8.95
   5  -3   5   10.20    8.84
   5  -3   5    4.89    5.67
  -5  -3  -5   -3.63   10.29
   5   3   6   14.38    8.33
  -5   3  -6   19.57    9.14
   5   3   6   11.43    7.51
   5   3   6    7.95    2.49
   5  -3   6   18.68    2.66
   5  -3   6   12.08    9.38
  -5  -3  -6   13.67    3.23
   5   3   7    7.28    2.79
   5   3   7   17.64    8.23
   5   3   7   25.33    9.30
   5  -3   7   12.64   11.29
  -5  -3  -7   10.87    3.26
   5  -3   7   13.46    3.07
  -5   3  -8 2123.17  113.62
   5   3   8 2108.27  106.21
   5   3   8 2113.45  115.78
   5   3   8 2125.46  113.42
   5  -3   8 1958.07  112.14
   5  -3   8 2218.53  104.54
   5  -3   8 2164.44  117.48
   5   3   9  374.37   32.14
  -5   3  -9  414.78   31.07
   5   3   9  423.84   30.80
   5   3   9  377.90   23.09
   5  -3   9  450.51   36.34
   5  -3   9  413.35   21.85
   5  -3   9  394.72   29.65
   5   3  10  323.90   27.41
  -5   3 -10  313.72   27.70
   5   3  10  330.73   30.16
   5   3  10  311.62   19.49
   5  -3  10  361.85   33.80
   5  -3  10  329.32   26.75
   5   3  11    0.49    4.15
   5   3  11   11.24   13.37
   5   3  11   -5.95   10.62
  -5  -3 -11   -3.56    8.02
   5  -3  11    4.48   16.14
   5  -3  11   -4.20   10.00
   5   3  12   15.89    4.72
   5   3  12   38.34   13.87
  -5  -3 -12   11.27   10.02
   5  -3  12   17.23   20.31
   5   3  13   78.63    8.89
  -5   4  12   26.74   12.84
  -5  -4  12   33.90    9.34
  -5   4  11   41.30    9.87
  -5   4  11   29.76    6.34
  -5  -4  11   26.53   20.33
  -5  -4  11   28.94    8.40
  -5   4  10  285.24   18.65
   5   4 -10  281.06   25.34
  -5   4  10  277.43   25.68
  -5  -4  10  269.99   33.10
  -5  -4  10  301.49   20.23
  -5   4   9   13.05   10.54
   5   4  -9    7.62    9.46
  -5   4   9    8.29    4.48
  -5  -4   9   10.13   17.26
  -5  -4   9    1.13    6.96
   5  -4  -9    3.92    5.14
  -5   4   8   86.52    8.39
   5   4  -8  124.12   14.90
  -5   4   8   95.22   14.96
   5  -4  -8  110.56    9.37
  -5  -4   8   89.51    9.86
  -5  -4   8  128.06   21.27
   5   4  -7   12.67    7.77
  -5   4   7    9.75    3.41
  -5   4   7   19.87    9.98
  -5  -4   7   19.42    6.27
   5  -4  -7   22.53    4.53
   5  -4  -7   14.84    5.55
  -5  -4   7    8.25   14.40
  -5   4   6  252.48   16.08
  -5   4   6  262.34   21.14
   5   4  -6  244.47   20.24
   5  -4  -6  267.84   15.38
   5  -4  -6  275.15   16.18
  -5  -4   6  256.74   25.09
  -5  -4   6  295.67   17.64
   5  -4  -6  277.58   22.49
   5   4  -5   87.92   10.50
  -5   4   5   86.04    6.74
  -5   4   5   76.68    4.30
  -5   4   5   82.53    9.56
  -5   4   5   76.18    6.04
  -5  -4   5   85.13   14.02
  -5  -4   5   71.85    7.15
   5  -4  -5   75.85   11.44
  -5   4   4   24.75    3.71
   5   4  -4    7.50   10.50
   5   4  -4   25.87    4.38
  -5   4   4   23.88    6.07
   5   4  -4   29.49    7.04
  -5   4   4   25.88    3.79
  -5  -4   4   37.05    8.37
   5  -4  -4   29.49    9.53
  -5  -4   4   28.48    9.58
  -5   4   3 2073.81  105.90
  -5   4   3 2169.68  109.36
   5   4  -3 2087.40  106.21
  -5   4   3 2256.50  108.06
  -5   4   3 2256.76  105.44
   5   4  -3 2049.19  112.33
   5   4  -3 2245.42  110.05
  -5  -4   3 2294.22  113.10
  -5  -4   3 2306.34  110.25
  -5   4   2    5.96    2.23
  -5   4   2    0.90    4.74
   5   4  -2   -0.86    8.83
  -5   4   2    8.08    4.76
  -5   4   2    0.43    2.24
  -5   4   2    4.83    2.32
   5   4  -2    2.25    4.15
   5   4  -2    1.69    3.86
  -5   4   2    3.71    1.71
  -5  -4   2    7.45    6.55
  -5  -4   2    0.57    5.82
   5  -4  -2    3.03    0.99
  -5  -4   2    2.65    2.86
   5   4  -1  614.08   38.14
   5   4  -1  767.96   41.93
  -5   4   1  621.57   36.56
  -5   4   1  651.44   33.67
   5   4  -1  660.00   35.54
   5   4  -1  632.76   33.79
  -5   4   1  657.25   32.94
  -5   4   1  706.77   35.93
  -5   4   1  611.45   32.43
  -5  -4   1  665.01   35.94
   5  -4  -1  675.67   32.17
  -5  -4   1  639.51   34.06
  -5  -4   1  665.24   37.95
   5   4   0  140.90   14.99
  -5   4   0  130.35    7.54
   5   4   0   98.64   12.30
   5   4   0  114.40    8.91
  -5   4   0  113.33   11.24
   5   4   0  124.19    9.45
  -5   4   0  128.64    9.93
  -5   4   0  129.35    7.69
   5  -4   0  141.54    7.73
   5  -4   0  120.98    9.54
  -5  -4   0  123.90   10.25
  -5  -4   0  133.29   11.72
  -5  -4   0  136.59    9.19
  -5   4  -1  672.81   33.64
   5   4   1  694.73   35.00
  -5   4  -1  685.90   38.56
   5   4   1  654.28   38.94
  -5   4  -1  672.93   33.84
  -5   4  -1  689.99   37.27
   5   4   1  653.25   42.03
  -5  -4  -1  639.24   36.06
   5  -4   1  701.88   34.19
   5  -4   1  703.47   36.06
   5  -4   1  686.88   36.98
  -5  -4  -1  711.61   38.56
  -5  -4  -1  659.27   35.16
  -5   4  -2  128.35   11.86
  -5   4  -2  118.74   13.25
  -5   4  -2  150.21    8.50
   5   4   2  115.71   15.11
  -5   4  -2  129.83    7.30
   5   4   2  124.45   11.76
   5   4   2  123.02    7.97
   5  -4   2  130.93   11.48
  -5  -4  -2  134.93    9.06
  -5  -4  -2  114.60    9.36
   5  -4   2  114.70   10.25
   5   4   3   71.68   12.26
  -5   4  -3  109.54   11.69
   5   4   3   93.61    6.02
  -5   4  -3  100.10    6.69
   5   4   3   99.13   10.69
   5   4   3  100.88    7.52
  -5   4  -3   91.86    5.37
  -5   4  -3   76.52   11.60
   5  -4   3   97.45    9.67
  -5  -4  -3   84.70    7.09
  -5  -4  -3   85.85    7.35
  -5  -4  -3  113.23   14.26
   5  -4   3  102.25   11.26
   5   4   4   51.25    5.38
  -5   4  -4   43.82    4.55
   5   4   4   28.20    9.11
  -5   4  -4   41.06    3.12
  -5   4  -4   39.76   10.06
  -5   4  -4   48.69    9.33
   5   4   4   61.63    4.51
  -5  -4  -4   38.32   10.74
   5  -4   4   52.06   11.02
  -5  -4  -4   51.08    5.25
   5  -4   4   41.11    7.47
  -5   4  -5  977.12   58.95
   5   4   5 1051.34   59.67
   5   4   5 1032.84   51.64
  -5  -4  -5 1062.28   52.62
   5  -4   5 1075.94   57.56
   5  -4   5 1123.34   61.00
   5   4   6  227.70   10.23
   5   4   6  193.55   18.35
   5   4   6  241.87   19.04
   5  -4   6  237.55   21.47
  -5  -4  -6  218.27   10.88
   5  -4   6  246.59   17.07
   5   4   7  637.82   33.56
  -5   4  -7  636.66   41.57
   5   4   7  618.34   42.38
   5   4   7  624.06   41.34
   5  -4   7  676.91   33.13
   5  -4   7  625.05   40.11
  -5  -4  -7  667.63   34.07
   5  -4   7  619.77   44.25
   5   4   8  104.50   16.33
  -5   4  -8  107.01   15.24
   5   4   8  125.13   16.04
   5  -4   8  121.93   20.61
   5  -4   8  106.46    7.77
   5   4   9  480.54   37.89
   5   4   9  532.84   35.91
  -5   4  -9  522.68   36.32
   5   4   9  481.31   28.20
   5  -4   9  554.34   41.73
   5   4  10  276.55   27.91
   5   4  10  250.97   16.67
   5   4  10  232.77   23.34
  -5   4 -10  219.26   23.26
   5  -4  10  214.39   28.17
   5  -4  10  234.00   22.41
  -5  -4 -10  230.86   20.07
   5   4  11   25.11   15.33
   5   4  11    3.27    4.41
   5   4  11   12.02   11.89
  -5   4 -11   -4.87   11.19
   5  -4  11   20.46   20.62
   5  -4  11    4.26    9.77
   5   4  12   81.51   16.31
   5   4  12   73.33    8.42
  -5  -5  12  122.82   13.99
  -5   5  11  191.77   22.44
  -5   5  11  169.03   13.96
   5   5 -11  177.04   21.56
  -5  -5  11  197.16   31.21
  -5  -5  11  209.76   16.75
  -5   5  10    8.53   13.31
  -5   5  10    2.81    4.73
   5   5 -10   -8.76   11.38
  -5  -5  10   -6.95   17.66
  -5  -5  10    0.66    6.86
  -5   5   9   69.07    8.02
   5   5  -9   52.55   12.94
  -5   5   9   67.63   15.40
  -5  -5   9   83.46   21.34
  -5  -5   9   79.16    9.99
  -5   5   8  128.79   17.69
   5   5  -8  140.24   16.94
  -5   5   8  136.45   10.90
  -5  -5   8  139.73   12.51
  -5  -5   8  150.59   23.19
  -5   5   7  192.85   13.17
  -5   5   7  161.70   18.22
   5   5  -7  198.57   18.72
  -5  -5   7  173.64   23.29
  -5  -5   7  188.14   14.10
  -5   5   6  994.33   54.00
  -5   5   6  961.78   47.94
   5   5  -6 1072.90   54.68
  -5  -5   6 1003.05   49.00
   5  -5  -6  860.01   44.45
  -5  -5   6 1085.22   60.16
   5  -5  -6  976.12   44.83
  -5   5   5  755.81   38.33
  -5   5   5  753.60   36.22
  -5   5   5  787.20   33.03
   5   5  -5  823.19   39.32
  -5  -5   5  829.24   44.29
  -5  -5   5  781.91   34.07
  -5   5   4 1428.60   75.53
   5   5  -4 1561.42   77.93
  -5   5   4 1426.64   77.43
  -5   5   4 1432.79   72.93
  -5  -5   4 1478.27   73.93
  -5  -5   4 1535.64   81.50
  -5   5   3   -3.61    5.80
  -5   5   3    4.10    3.06
  -5   5   3    8.52    6.13
   5   5  -3   -0.73    5.15
  -5   5   3   -0.34    1.90
  -5   5   3    0.31    2.11
   5  -5  -3    0.63    0.56
  -5  -5   3    3.26    7.48
  -5  -5   3    5.17    6.52
   5   5  -2    3.71    4.75
  -5   5   2    2.28    5.34
  -5   5   2    0.75    1.77
  -5   5   2    1.60    2.50
  -5   5   2   -0.50    2.56
  -5   5   2    0.38    3.69
  -5   5   2    4.44    6.03
  -5  -5   2    1.96    5.41
  -5  -5   2   -1.01    7.11
  -5   5   1 1825.00   91.27
  -5   5   1 1727.35   92.69
  -5   5   1 1742.31   88.19
   5   5  -1 2069.78   98.24
  -5   5   1 1858.20   87.30
   5   5  -1 1866.36   90.01
   5   5  -1 1761.86   88.19
  -5   5   1 1737.91   86.29
  -5  -5   1 1826.90   93.43
  -5  -5   1 1743.98   90.40
  -5  -5   1 1783.86   88.58
  -5   5   0   54.94    3.99
   5   5   0   58.46    6.19
  -5   5   0   56.98    4.67
   5   5   0   51.04    5.83
  -5   5   0   58.02    6.93
  -5   5   0   39.88    9.06
   5   5   0   51.03   11.16
  -5  -5   0   49.58    5.50
  -5  -5   0   53.72    8.44
  -5  -5   0   66.79    7.77
   5  -5   0   53.17    6.70
  -5   5  -1  555.55   31.16
  -5   5  -1  545.78   27.04
   5   5   1  528.97   28.33
   5   5   1  568.50   37.18
  -5   5  -1  586.34   33.71
  -5   5  -1  531.19   27.23
  -5  -5  -1  526.88   28.80
  -5  -5  -1  499.02   29.58
   5  -5   1  538.27   30.92
  -5  -5  -1  535.51   32.52
  -5   5  -2  148.32   13.59
  -5   5  -2  196.78   10.48
  -5   5  -2  140.49    9.02
   5   5   2  155.26    9.49
  -5   5  -2  151.73   15.94
   5   5   2  147.01   17.72
  -5  -5  -2  163.61   11.59
  -5  -5  -2  145.84   10.73
   5  -5   2  182.35   12.36
   5  -5   2  169.38   13.95
   5   5   3  724.81   36.11
  -5   5  -3  729.78   35.89
  -5   5  -3  836.27   45.09
  -5   5  -3  780.80   36.86
  -5   5  -3  783.08   42.57
   5   5   3  745.55   46.81
   5  -5   3  750.96   40.15
  -5  -5  -3  707.70   38.08
   5  -5   3  682.99   35.86
   5  -5   3  740.71   42.24
  -5  -5  -3  739.73   38.27
  -5   5  -4  825.12   50.04
   5   5   4  816.17   50.96
   5  -5   4  830.14   46.26
   5  -5   4  702.94   40.89
  -5  -5  -4  777.28   42.90
   5  -5   4  882.32   49.37
   5   5   5   16.91    8.84
  -5   5  -5   37.65    9.53
   5   5   5   45.63    3.85
   5  -5   5   36.96    3.30
   5  -5   5   31.87   12.24
   5  -5   5   49.15    9.28
  -5  -5  -5   41.22    5.33
  -5   5  -6  199.43   19.44
   5   5   6  196.89   19.87
   5  -5   6  223.55   11.97
  -5  -5  -6  189.96   13.16
   5  -5   6  213.90   18.21
   5  -5   6  229.71   22.91
  -5   5  -7    5.00    8.78
   5   5   7   16.65   10.14
   5  -5   7    4.10    7.46
   5  -5   7   31.12   14.65
  -5  -5  -7    7.44    3.91
   5  -5   7    6.94    2.58
   5   5   8  591.62   40.37
  -5   5  -8  567.74   39.94
   5  -5   8  593.17   38.28
   5  -5   8  687.91   46.54
   5   5   9   21.77   11.69
  -5   5  -9   33.70   13.02
   5  -5   9   43.00   11.73
   5  -5   9   23.29   17.77
  -5   5 -10  151.61   19.46
   5   5  10  165.51   12.94
   5   5  10  133.32   19.27
   5  -5  10  151.59   26.57
   5   5  11  162.47   13.27
   5  -5  11  182.36   28.61
  -5   6  11   26.82   15.03
  -5  -6  11   35.28    8.89
  -5   6  10  124.20   20.02
   5   6 -10   77.09   16.32
  -5   6  10   97.49    9.95
  -5  -6  10   99.93   11.28
  -5  -6  10   98.70   24.49
   5   6  -9    9.99   11.61
  -5   6   9    1.65   11.68
  -5   6   9   -0.55    4.04
  -5  -6   9  -10.84   18.12
  -5  -6   9   -0.65    6.14
  -5   6   8   30.70    5.82
  -5   6   8   35.27   11.48
   5   6  -8   15.82   10.25
  -5  -6   8    9.94   16.15
  -5  -6   8   41.96    7.21
  -5   6   7   56.31   12.37
   5   6  -7   70.14   11.95
  -5   6   7   64.58    7.31
  -5  -6   7   63.43    8.34
  -5  -6   7   66.96   17.47
   5   6  -6   67.31   12.17
  -5   6   6   75.64    7.74
  -5   6   6   68.58   11.88
  -5  -6   6   80.12   17.39
  -5  -6   6   80.04    8.65
   5   6  -5  235.83   19.32
  -5   6   5  201.88   13.95
  -5   6   5  204.76   18.63
  -5  -6   5  234.40   23.53
  -5  -6   5  235.01   15.46
  -5   6   4   15.54    3.58
   5   6  -4   21.47    8.11
  -5   6   4   15.69    6.80
  -5  -6   4   18.70    4.81
  -5  -6   4   21.53   10.61
  -5   6   3  358.51   23.38
   5   6  -3  339.12   22.75
  -5   6   3  288.25   23.55
  -5  -6   3  320.89   19.85
  -5  -6   3  326.80   26.29
  -5   6   2  221.12   15.72
  -5   6   2  188.17   17.84
   5   6  -2  229.53   16.73
  -5   6   2  238.48   18.43
   5   6  -2  242.51   23.94
  -5   6   2  232.92   13.69
  -5  -6   2  217.20   17.37
  -5  -6   2  203.03   19.55
   5   6  -1  197.27   20.61
  -5   6   1  206.52   16.99
  -5   6   1  194.05   12.11
   5   6  -1  211.63   14.70
  -5   6   1  185.28   18.04
  -5  -6   1  196.07   15.52
  -5  -6   1  189.36   17.44
  -5   6   0   81.22   12.28
  -5   6   0   66.43    5.67
   5   6   0   58.08   13.21
  -5   6   0   60.12    7.58
  -5   6   0   65.05    8.19
   5   6   0   65.40    7.06
  -5  -6   0   77.62    7.19
  -5  -6   0   71.67    8.83
   5  -6   0   56.39    7.94
  -5  -6   0   77.24   10.40
  -5   6  -1  223.66   12.35
   5   6   1  233.50   22.25
  -5   6  -1  262.18   20.99
  -5   6  -1  229.79   16.36
  -5   6  -1  226.40   13.00
  -5   6  -1  214.69   16.37
   5   6   1  228.44   13.72
  -5  -6  -1  224.99   14.57
   5  -6   1  221.94   16.71
  -5  -6  -1  210.74   15.49
  -5  -6  -1  212.06   17.83
  -5   6  -2  436.48   31.21
   5   6   2  404.01   23.68
  -5   6  -2  466.71   28.96
  -5   6  -2  474.39   28.71
   5   6   2  415.09   34.12
  -5  -6  -2  429.59   25.68
  -5  -6  -2  445.69   26.08
   5  -6   2  469.11   29.35
  -5   6  -3  666.20   38.99
   5   6   3  634.12   32.58
   5   6   3  705.21   45.07
  -5   6  -3  710.59   33.53
  -5   6  -3  674.40   42.42
  -5  -6  -3  625.56   35.07
  -5  -6  -3  606.82   34.96
   5  -6   3  705.32   39.91
  -5   6  -4    2.86    6.38
   5   6   4    2.90   10.46
   5  -6   4    4.83    2.20
  -5  -6  -4   12.24    4.95
   5  -6   4   20.99    9.53
  -5   6  -5  415.13   28.60
   5   6   5  389.88   30.63
   5  -6   5  387.36   20.74
   5  -6   5  433.41   26.86
  -5  -6  -5  405.73   22.90
   5  -6   5  429.11   30.75
   5   6   6  196.02   21.65
  -5   6  -6  242.18   21.73
   5  -6   6  252.31   13.97
   5  -6   6  255.63   24.50
   5  -6   6  274.16   20.53
   5   6   7  468.42   34.62
  -5   6  -7  447.07   33.93
   5  -6   7  519.96   38.04
   5  -6   7  479.44   31.79
  -5   6  -8    4.24   10.19
   5   6   8   -5.65   11.41
   5  -6   8    7.84    8.07
   5  -6   8   -1.75   15.29
   5   6   9   34.64   12.57
  -5   6  -9   12.22   11.26
   5  -6   9   23.09    9.90
   5  -6   9   47.14   18.53
   5   6  10  101.87   10.46
   5  -6  10   60.95   22.29
  -5   7  10   55.51   17.06
  -5  -7  10   50.77    8.91
  -5   7   9  103.65   10.58
  -5   7   9  133.90   19.92
   5   7  -9  125.17   18.40
  -5  -7   9  142.30   24.91
  -5  -7   9  132.86   12.41
  -5   7   8  652.56   45.75
   5   7  -8  708.01   45.48
  -5   7   8  638.97   37.52
  -5  -7   8  760.32   52.72
  -5  -7   8  726.92   39.11
   5   7  -7  115.34   16.22
  -5   7   7  129.07   16.89
  -5   7   7  117.98   10.70
  -5  -7   7  155.27   21.57
  -5  -7   7  132.00   11.88
  -5   7   6  369.76   30.99
  -5   7   6  425.02   26.10
   5   7  -6  543.77   33.69
  -5  -7   6  464.41   27.29
  -5  -7   6  558.12   38.86
  -5   7   5   11.90    7.31
  -5   7   5    8.96    3.74
   5   7  -5    8.55    8.23
  -5  -7   5   11.34   11.78
  -5  -7   5   12.87    5.26
  -5   7   4  169.75   18.63
   5   7  -4  240.68   19.48
  -5  -7   4  231.44   23.26
  -5  -7   4  237.28   16.17
   5   7  -3   71.52   10.38
  -5   7   3   53.26   11.53
  -5  -7   3   78.89    8.39
   5   7  -2 1127.79   61.81
   5   7  -2 1231.42   71.84
  -5   7   2 1022.80   64.93
  -5  -7   2 1208.68   60.20
  -5  -7   2 1123.05   66.16
   5   7  -1  769.78   40.74
   5   7  -1  770.79   50.41
  -5   7   1  698.99   45.83
  -5  -7   1  722.28   41.84
  -5  -7   1  683.55   44.77
   5   7   0   73.02   14.55
   5   7   0   58.87    6.87
  -5  -7   0   60.57   10.69
   5  -7   0   44.07    7.88
  -5  -7   0   56.42    8.56
   5   7   1 1015.82   62.39
   5  -7   1 1001.30   54.55
  -5  -7  -1  929.54   51.19
  -5  -7  -1 1057.19   52.65
  -5  -7  -1 1052.07   57.18
  -5   7  -2    0.73    6.55
   5   7   2  -10.23   12.39
   5   7   2   -8.87   11.74
   5  -7   2    0.91    7.04
  -5  -7  -2   -0.49    5.20
  -5  -7  -2   -2.50    3.93
  -5   7  -3  981.32   54.94
   5   7   3  920.35   61.16
   5   7   3 1019.76   62.71
   5  -7   3 1057.08   57.34
  -5  -7  -3  962.98   51.21
   5   7   4  625.21   44.10
  -5   7  -4  645.46   39.05
   5   7   4  671.14   45.29
   5  -7   4  610.15   31.92
   5  -7   4  673.66   40.91
  -5   7  -5    5.53    9.23
   5   7   5   -9.25   10.31
   5   7   5    3.31   11.61
   5  -7   5   -2.59   10.83
   5  -7   5   -0.48    2.35
  -5   7  -6  416.53   30.28
   5   7   6  386.01   32.73
   5   7   6  348.52   30.54
   5  -7   6  421.13   32.25
   5   7   7   57.82   15.26
  -5   7  -7   45.79   12.55
   5   7   7   42.43   13.74
   5  -7   7   42.40   15.20
  -5   7  -8   -5.85   11.58
   5   7   8   -7.53   11.03
   5  -7   8   -1.81   15.16
  -5   7  -9   44.45   14.19
   5  -7   9   55.86   19.29
  -5   8   9   62.09   16.61
  -5  -8   9   69.22    9.65
  -5   8   8   26.36   12.19
  -5   8   8   14.84    6.17
   5   8  -8   13.16   11.25
  -5  -8   8   10.43    6.51
  -5   8   7  103.03   16.57
   5   8  -7  139.82   17.56
  -5   8   7  114.10   10.85
  -5  -8   7  140.87   22.31
  -5  -8   7  116.75   11.65
  -5   8   6   64.53    7.84
  -5   8   6   66.45   12.97
  -5  -8   6   59.37    8.50
   5   8  -5   53.85   11.46
  -5   8   5   47.71    6.59
  -5   8   5   55.68   11.83
  -5  -8   5   28.47   14.01
  -5  -8   5   63.44    8.33
  -5   8   4  353.35   29.52
   5   8  -4  456.93   29.55
  -5  -8   4  408.12   25.25
  -5  -8   4  412.62   33.45
  -5   8   3    1.32    8.77
   5   8  -3    2.04   14.57
   5   8  -3    0.86    7.63
  -5  -8   3   -4.44   10.47
  -5  -8   3    2.83    4.79
   5   8  -2  310.93   30.10
  -5   8   2  247.68   24.13
  -5  -8   2  294.78   18.82
  -5  -8   2  256.42   24.44
   5   8  -1   -5.70   12.59
  -5   8   1    1.45   10.48
  -5  -8   1    5.45    4.87
  -5  -8   1    2.53    8.62
   5   8   0   -5.69   13.41
   5  -8   0    3.51    6.53
  -5  -8   0    0.55    4.15
  -5  -8   0   -2.43    7.71
   5   8   1  139.69   20.94
   5  -8   1  116.88   13.47
   5   8   2    6.02   12.00
   5   8   2   -1.92   13.10
   5  -8   2    3.99    7.54
   5   8   3  193.91   24.59
   5   8   3  155.81   22.87
   5  -8   3  210.75   19.53
   5   8   4  155.08   21.03
   5   8   4  142.43   21.68
   5  -8   4  185.87   19.31
   5   8   5  930.89   62.63
   5   8   5  914.24   61.43
   5  -8   5 1036.97   59.56
   5   8   6  405.96   36.04
   5   8   6  486.05   39.45
  -5   8  -7  265.08   25.33
   5   8   7  299.87   29.85
   5  -8   7  274.24   27.65
  -5   8  -8   36.69   14.62
   5  -8   8   31.41   16.66
  -5  -9   7  146.14   13.64
  -5   9   6  179.45   14.57
  -5  -9   6  204.88   15.74
  -5   9   5   67.59    8.09
  -5   9   5   44.11   12.83
  -5  -9   5   77.54   17.67
  -5  -9   5   79.21    9.65
  -5   9   4   48.34   12.78
   5   9  -4   52.40   19.92
  -5  -9   4   61.35   15.84
  -5  -9   4   51.29    7.88
  -5   9   3  195.78   22.40
  -5  -9   3  246.37   17.24
  -5  -9   3  209.83   23.18
   5   9  -2  667.34   50.01
  -5   9   2  581.88   42.75
  -5  -9   2  646.29   35.89
  -5  -9   2  550.89   41.93
  -5   9   1    8.33    9.97
  -5  -9   1   -2.84    9.42
  -5  -9   1    5.55    5.51
   5   9   0  247.91   28.67
  -5  -9   0  200.92   21.93
  -5  -9   0  229.32   16.51
   5   9   1   63.53   19.61
   5   9   1   58.51   18.32
   5  -9   1   59.66   11.04
  -5  -9  -1   54.98    7.85
   5   9   2   49.37   17.32
   5   9   2   53.40   18.70
   5  -9   2   58.87   11.33
   5   9   3   16.95   14.50
   5   9   3   16.99   17.21
   5  -9   3   32.58   10.35
   5   9   4  530.74   41.89
   5   9   4  463.56   41.31
   5  -9   4  489.00   35.56
   5   9   5   35.38   16.09
   5   9   5   37.47   16.52
   5  -9   5    9.08   12.03
   5  -9   6    9.96   11.66
   5  -9   7    8.89   14.27
  -5  10   5    6.27    4.79
  -5 -10   4   76.32    9.80
   5  10  -3   42.88   19.86
  -5 -10   3   24.77    7.12
   5  10  -2  115.51   23.90
  -5 -10   2  104.75   10.91
   5  10  -1  125.42   23.35
  -5 -10   1  125.91   18.77
  -5 -10   1  124.79   12.17
  -5 -10   0   12.57    6.30
  -5 -10   0    3.09   10.13
   5  10   1   68.28   21.25
   5  10   1   77.85   22.85
   5 -10   1   68.41   12.97
  -5 -10  -1   65.14    9.22
   5  10   2   92.43   22.89
   5 -10   2   83.57   13.96
   5  10   3  -16.24   19.51
   5 -10   3   14.44    9.70
   5 -10   4  216.96   22.33
   5 -10   5    9.41   12.06
   5 -11   2   66.71   13.87
   6   0 -13   -9.39   10.92
  -6   0  12  255.60   18.59
   6   0 -12  285.44   23.82
  -6   0  12  270.89   31.17
   6   0 -11    4.60    8.13
  -6   0  11   12.47   15.60
  -6   0  11    1.16    4.96
  -6   0  10  333.98   32.06
   6   0 -10  339.78   25.45
   6   0  -9   -0.96    7.78
  -6   0   9   -8.29   12.35
   6   0  -8  564.16   35.30
  -6   0   8  572.95   31.49
  -6   0   8  569.32   40.33
   6   0  -8  609.28   34.94
   6   0  -7   -1.01    7.98
   6   0  -7   -0.64    6.08
  -6   0   7   -0.39    3.02
  -6   0   7   10.09   10.80
   6   0  -7    0.77    5.41
  -6   0   6  457.57   28.93
   6   0  -6  516.62   30.99
   6   0  -6  434.13   25.03
   6   0  -6  448.38   28.31
   6   0  -6  467.95   27.13
  -6   0   6  485.14   25.62
  -6   0   6  520.16   32.77
  -6   0   5   -8.89    8.06
   6   0  -5   -0.60    4.06
   6   0  -5   -3.93    4.09
  -6   0   5    1.52    2.39
   6   0  -5   -3.54    6.69
  -6   0   5   -0.62    6.00
  -6   0   4 1344.34   69.56
  -6   0   4 1359.57   65.29
  -6   0   4 1304.88   67.56
   6   0  -4 1292.41   65.42
   6   0  -4 1272.33   67.54
   6   0  -4 1286.83   67.52
   6   0  -3   -0.69    3.25
  -6   0   3    2.14    5.61
  -6   0   3   -3.97    4.93
  -6   0   3   -0.23    1.98
   6   0  -2   44.84    6.32
   6   0  -2   41.81    5.63
  -6   0   2   40.23    6.32
  -6   0   2   29.93    5.63
   6   0  -2   33.82    3.38
  -6   0   2   34.41    3.59
   6   0  -1   -2.51    5.02
  -6   0   1   -1.42    1.90
  -6   0   1   -1.43    2.48
   6   0  -1   -2.66    3.15
  -6   0   1    2.50    5.03
   6   0  -1   -1.09    1.59
  -6   0   1    1.88    3.33
   6   0   0 3474.67  159.96
   6   0   0 3208.74  160.20
   6   0   0 3271.84  163.59
  -6   0   0 3158.22  161.22
  -6   0   0 3454.35  160.15
   6   0   0 3310.48  160.84
  -6   0   0 3287.94  163.72
  -6   0  -1    0.44    2.36
  -6   0  -1    1.29    1.38
   6   0   1    1.73    1.96
   6   0   1   -0.45    2.55
  -6   0  -1   -1.81    6.29
   6   0   1    0.10    1.85
   6   0   1   -0.52    4.75
   6   0   1   -0.18    1.64
  -6   0  -2 1299.21   64.11
  -6   0  -2 1329.81   66.61
  -6   0  -2 1364.58   65.16
  -6   0  -2 1374.63   69.71
   6   0   2 1372.77   64.98
   6   0   2 1329.18   64.15
   6   0   2 1262.32   66.53
   6   0   3    2.61    4.28
   6   0   3    0.85    1.64
  -6   0  -3    0.81    2.11
  -6   0  -3   -1.40    5.01
   6   0   3   -0.55    1.48
  -6   0  -3    2.17    6.34
  -6   0  -4 3386.16  157.30
   6   0   4 3163.24  153.43
  -6   0  -4 3344.52  159.45
   6   0   4 2844.51  157.15
   6   0   4 3121.88  158.48
   6   0   4 3218.00  152.56
   6   0   5   -0.66    1.83
   6   0   5    0.50    1.65
  -6   0  -5    5.52    7.93
   6   0   5    6.21    5.96
  -6   0  -5   -2.17    6.17
   6   0   5    0.27    2.05
   6   0   5    2.69    6.11
  -6   0  -6  210.25   17.41
   6   0   6  199.80   11.19
   6   0   6  171.36   16.44
   6   0   6  181.92   11.68
   6   0   6  156.49   15.46
   6   0   6  192.85   10.88
   6   0   7   -0.22    2.06
   6   0   7   -0.92    5.84
   6   0   7    3.30    7.35
   6   0   8  294.94   23.47
   6   0   8  237.07   21.76
   6   0   8  262.35   15.02
   6   0   9   -5.84   11.05
   6   0   9    0.29    2.59
   6   0   9    6.70    8.97
   6   0  10  177.05   20.49
   6   0  10  184.45   24.05
   6   0  10  210.12   12.96
   6   0  11  -14.58   17.74
  -6   0 -11    4.34   10.33
   6   0  11   -3.04   10.38
   6   0  11    1.46    3.11
   6   0  12   -3.19   11.39
   6   0  12   25.88   18.08
  -6   0 -12   10.81   11.69
   6   1 -13    2.87   11.36
   6  -1 -13    2.49    9.57
  -6   1  12   45.82    7.73
  -6   1  12   53.83   19.22
   6   1 -12   29.47   12.15
   6  -1 -12   51.91   11.95
  -6  -1  12   47.65    8.27
  -6  -1  12   40.31   20.55
   6   1 -11  415.06   30.68
  -6   1  11  353.23   35.67
  -6  -1  11  403.98   25.52
  -6  -1  11  450.83   39.36
   6  -1 -11  441.83   29.73
  -6   1  10 2825.53  148.77
   6   1 -10 2741.14  141.69
   6  -1 -10 2667.50  139.96
  -6  -1  10 2789.20  136.48
  -6  -1  10 2717.08  149.61
   6   1  -9  264.37   21.70
  -6   1   9  253.08   26.19
  -6   1   9  272.60   17.54
   6  -1  -9  279.89   21.15
   6  -1  -9  300.60   20.87
  -6  -1   9  276.77   27.97
  -6   1   8  457.98   26.20
  -6   1   8  480.71   34.79
   6   1  -8  461.03   30.64
   6   1  -8  504.14   30.59
   6  -1  -8  497.20   29.01
   6  -1  -8  467.69   29.47
  -6  -1   8  465.08   36.10
  -6   1   7    7.96    3.25
  -6   1   7    1.50    6.51
   6   1  -7    6.16    6.01
  -6   1   7   10.64    9.30
   6   1  -7   15.29    6.78
   6  -1  -7   11.12    5.74
   6  -1  -7   12.07    8.20
  -6  -1   7    2.70   10.36
  -6  -1   7    5.32    3.44
   6  -1  -7    3.91    5.24
   6   1  -6  738.78   42.76
  -6   1   6  715.47   38.87
   6   1  -6  717.41   40.84
  -6   1   6  746.95   44.77
  -6   1   6  767.23   42.12
  -6  -1   6  772.48   46.91
   6  -1  -6  743.69   40.17
  -6  -1   6  779.63   39.59
   6  -1  -6  728.36   41.40
  -6  -1   6  747.78   43.21
   6  -1  -6  802.65   43.63
   6   1  -5  377.18   20.67
   6   1  -5  350.33   22.02
  -6   1   5  381.14   23.47
   6   1  -5  306.00   23.52
  -6   1   5  382.53   25.50
  -6   1   5  365.74   20.75
  -6  -1   5  411.01   21.39
   6  -1  -5  414.68   24.72
   6  -1  -5  392.39   21.48
   6  -1  -5  353.61   22.60
  -6  -1   5  387.03   26.87
  -6  -1   5  405.73   24.96
   6   1  -4   59.51    6.13
   6   1  -4   47.57    4.65
  -6   1   4   50.29    8.04
  -6   1   4   41.90    6.66
   6   1  -4   59.63    9.24
  -6   1   4   47.07    4.63
   6  -1  -4   43.32    5.92
  -6  -1   4   45.11    9.27
  -6  -1   4   48.58    4.81
   6  -1  -4   48.33    4.65
   6  -1  -4   47.22    7.12
   6  -1  -4   44.44    4.76
  -6  -1   4   48.01    7.78
   6   1  -3   34.01    7.68
  -6   1   3   28.88    3.32
  -6   1   3   28.74    5.54
   6   1  -3   22.03    5.49
  -6   1   3   29.89    6.04
  -6  -1   3   33.43    3.89
   6  -1  -3   38.12    3.29
   6  -1  -3   37.03    3.67
  -6  -1   3   31.75    8.35
   6  -1  -3   44.26    5.78
   6  -1  -3   24.82    4.26
  -6  -1   3   20.74    5.97
   6   1  -2   50.62    6.10
  -6   1   2   52.40    5.92
   6   1  -2   60.37    7.77
  -6   1   2   64.23    6.15
  -6   1   2   52.93    4.15
   6   1  -2   45.97    7.70
  -6  -1   2   49.15    6.87
   6  -1  -2   46.03    4.94
  -6  -1   2   52.09    7.61
  -6  -1   2   48.67    4.84
   6  -1  -2   56.91    4.23
   6  -1  -2   45.91    4.89
   6   1  -1  493.03   29.16
   6   1  -1  465.16   24.55
  -6   1   1  510.65   24.21
   6   1  -1  513.82   26.23
  -6   1   1  464.56   25.42
  -6   1   1  450.14   25.89
   6   1  -1  472.27   26.62
  -6  -1   1  495.27   24.88
   6  -1  -1  471.07   24.91
  -6  -1   1  472.34   26.48
   6  -1  -1  462.08   25.73
  -6  -1   1  475.85   26.13
   6  -1  -1  464.85   24.02
  -6   1   0  569.77   26.21
   6   1   0  529.96   26.74
  -6   1   0  514.06   27.24
   6   1   0  547.55   27.65
  -6   1   0  510.82   29.34
   6   1   0  519.88   28.04
  -6  -1   0  530.98   26.85
   6  -1   0  502.27   28.61
  -6  -1   0  526.03   27.57
  -6  -1   0  522.28   30.82
   6  -1   0  496.66   25.96
  -6  -1   0  545.14   28.26
  -6   1  -1  262.04   16.52
  -6   1  -1  238.50   13.21
   6   1   1  257.78   13.43
  -6   1  -1  210.50   12.61
   6   1   1  226.63   13.97
  -6   1  -1  247.78   11.95
   6   1   1  258.97   15.39
   6   1   1  239.47   12.88
   6  -1   1  252.49   15.76
  -6  -1  -1  252.61   12.95
  -6  -1  -1  227.88   13.86
  -6  -1  -1  255.44   18.22
   6  -1   1  224.85   11.83
  -6   1  -2 8368.68  385.36
   6   1   2 8601.63  384.19
   6   1   2 8062.44  386.94
  -6   1  -2 8624.93  388.02
   6   1   2 8513.27  383.86
  -6   1  -2 8252.84  384.17
   6  -1   2 9393.18  384.90
  -6  -1  -2 8756.92  390.73
  -6  -1  -2 8336.26  387.55
  -6  -1  -2 8407.12  383.87
   6  -1   2 8289.24  385.91
   6  -1   2 7372.29  382.65
   6  -1   2 8693.45  388.12
   6   1   3   39.92    3.57
   6   1   3   27.67    6.46
   6   1   3   27.72    3.09
   6   1   3   23.55    5.95
  -6   1  -3   30.42    5.72
  -6   1  -3   24.96    3.15
  -6   1  -3   24.19    7.33
   6  -1   3   24.34    1.86
  -6  -1  -3   32.52    7.19
  -6  -1  -3   18.28    8.69
   6  -1   3   27.09    3.06
   6  -1   3   25.92    6.44
   6  -1   3   21.31    5.77
   6   1   4 4386.11  208.81
  -6   1  -4 4476.89  212.82
  -6   1  -4 4384.99  209.22
   6   1   4 4412.03  213.99
   6   1   4 4253.44  209.07
  -6   1  -4 4672.95  215.36
   6   1   4 4479.98  215.30
   6  -1   4 4299.20  207.80
  -6  -1  -4 4498.77  216.43
   6  -1   4 3944.42  212.91
   6  -1   4 4413.71  209.47
  -6  -1  -4 4598.79  214.03
  -6  -1  -4 4415.03  209.19
   6   1   5    1.27    2.00
   6   1   5    0.63    2.19
   6   1   5    1.81    6.24
   6   1   5    3.50    6.47
  -6   1  -5    4.60    7.39
  -6   1  -5    3.08    2.59
  -6   1  -5    2.91    6.56
  -6  -1  -5    7.15    7.79
  -6  -1  -5    1.68    2.24
  -6  -1  -5   -1.64    7.38
   6  -1   5    1.73    6.55
   6  -1   5    2.94    1.25
   6  -1   5    1.11    1.62
   6  -1   5    2.55    2.20
   6   1   6  127.37   14.65
   6   1   6  147.48    9.30
   6   1   6  151.46   15.12
   6   1   6  130.37    9.16
  -6   1  -6  151.90   14.61
   6  -1   6  132.87   15.29
   6  -1   6  136.79    9.67
  -6  -1  -6  167.90   15.95
   6  -1   6  146.01   15.09
  -6  -1  -6  149.70    9.42
   6  -1   6  149.34    8.28
   6   1   7  228.11   20.39
   6   1   7  243.19   14.11
   6   1   7  253.86   21.49
   6   1   7  224.56   13.68
   6   1   7  235.29   14.15
   6  -1   7  216.63   20.14
   6  -1   7  229.64   21.69
   6  -1   7  236.14   12.95
   6   1   8   25.61    8.75
   6   1   8   26.31    4.49
   6   1   8   28.72   10.12
   6   1   8   29.92    4.03
   6  -1   8   30.80   10.06
   6  -1   8   31.60    3.56
   6  -1   8   17.85   10.81
   6   1   9  144.61   16.70
   6   1   9  116.81    8.93
   6   1   9  160.51   16.72
   6  -1   9  142.80   19.85
   6  -1   9  124.45    8.46
   6  -1   9  118.89   15.57
  -6   1 -10   99.93   15.91
   6   1  10  133.98    9.39
   6   1  10  151.50   18.23
   6   1  10   88.86   15.48
   6  -1  10  119.77    8.77
   6  -1  10  104.05   19.99
   6  -1  10  105.26   15.68
   6   1  11   56.12   14.13
   6   1  11   69.05    6.91
   6   1  11   77.49   17.21
  -6   1 -11   63.51   14.59
  -6  -1 -11   55.12   12.91
   6  -1  11   83.81   19.97
   6  -1  11   74.93   14.26
   6   1  12  192.89   27.06
   6   1  12  191.12   22.85
  -6   1 -12  228.54   23.98
   6   1  12  218.98   14.49
  -6  -1 -12  213.75   22.38
   6  -1  12  201.62   28.88
   6   2 -12  205.60   22.64
  -6   2  12  240.39   29.26
   6  -2 -12  253.52   21.21
  -6  -2  12  226.61   31.97
  -6  -2  12  244.99   18.01
   6   2 -11  113.89   16.24
  -6   2  11  158.05   21.96
   6  -2 -11  125.64   14.45
  -6  -2  11  127.42   11.94
  -6  -2  11  111.35   23.66
   6   2 -10 1077.88   63.47
  -6   2  10  984.18   66.58
  -6   2  10 1083.11   57.24
  -6  -2  10 1146.06   58.26
  -6  -2  10 1194.20   72.06
   6  -2 -10 1064.64   60.28
  -6   2   9  264.55   25.17
  -6   2   9  272.39   18.11
   6   2  -9  293.82   23.67
  -6  -2   9  312.09   19.21
  -6  -2   9  260.23   28.31
   6  -2  -9  299.28   21.11
   6  -2  -9  320.58   21.52
   6   2  -8    9.18    7.05
  -6   2   8   25.02    9.58
  -6   2   8   14.42    4.01
  -6  -2   8   11.36   13.48
   6  -2  -8   10.17    6.35
   6  -2  -8    3.51    5.30
  -6   2   7  804.10   44.59
  -6   2   7  807.05   41.70
   6  -2  -7  825.29   47.01
   6  -2  -7  849.58   44.00
   6  -2  -7  864.92   42.90
  -6  -2   7  840.79   51.51
  -6   2   6  143.60   12.15
   6   2  -6  133.29   11.84
  -6   2   6  131.49    9.37
   6   2  -6  136.22   15.12
  -6   2   6  155.68   12.75
   6  -2  -6  146.27   13.82
  -6  -2   6  155.93   17.91
  -6  -2   6  133.55   10.07
   6  -2  -6  124.94    9.85
   6  -2  -6  118.94   10.81
  -6   2   5 1642.42   90.63
   6   2  -5 1743.26   87.59
   6   2  -5 1755.59   89.64
   6   2  -5 1764.77   93.88
  -6   2   5 1722.26   87.63
  -6   2   5 1756.65   89.72
   6   2  -5 1729.74   91.64
   6  -2  -5 1749.49   91.00
   6  -2  -5 1844.67   87.97
  -6  -2   5 1826.58   88.40
   6  -2  -5 1858.89   89.19
   6  -2  -5 1848.32   87.17
  -6  -2   5 1871.92   95.46
  -6  -2   5 1770.27   91.85
   6   2  -4  789.02   40.50
  -6   2   4  795.15   36.41
  -6   2   4  688.33   38.79
   6   2  -4  727.66   41.91
   6   2  -4  727.40   36.28
  -6   2   4  760.35   37.96
  -6  -2   4  783.72   40.41
   6  -2  -4  779.90   39.22
  -6  -2   4  804.57   43.43
  -6  -2   4  781.28   37.21
   6  -2  -4  768.45   37.25
   6  -2  -4  770.77   36.54
   6  -2  -4  646.91   34.95
   6  -2  -4  631.10   34.65
  -6   2   313047.80  622.89
   6   2  -312452.30  625.22
   6   2  -312511.00  620.85
  -6   2   312562.80  621.83
  -6   2   312946.00  620.54
   6   2  -313162.20  624.00
  -6  -2   312964.80  625.59
   6  -2  -313021.30  621.13
   6  -2  -313270.20  622.58
  -6  -2   312985.90  623.82
  -6  -2   313357.70  621.41
   6  -2  -313561.00  620.73
   6   2  -2  327.90   20.30
   6   2  -2  370.64   23.69
   6   2  -2  293.06   21.44
  -6   2   2  321.70   18.61
  -6   2   2  346.18   17.54
  -6   2   2  327.60   18.68
  -6  -2   2  332.52   18.44
  -6  -2   2  294.76   20.00
   6  -2  -2  326.10   18.90
   6  -2  -2  322.72   17.73
   6  -2  -2  332.99   17.55
  -6  -2   2  363.63   21.49
   6   2  -1  847.72   41.87
  -6   2   1  820.73   39.45
  -6   2   1  781.15   39.17
  -6   2   1  776.01   40.38
   6   2  -1  811.34   43.07
  -6   2   1  675.74   39.24
  -6   2   1  813.22   40.22
   6  -2  -1  804.79   39.47
  -6  -2   1  875.97   42.98
  -6  -2   1  845.59   40.40
   6  -2  -1  834.38   39.30
  -6   2   0  864.18   52.87
   6   2   0 1103.11   53.72
   6   2   0 1132.00   54.73
  -6   2   0 1094.33   53.62
  -6   2   0 1086.21   53.19
   6   2   0 1045.97   55.90
  -6   2   0 1108.89   54.98
  -6   2   0 1134.60   52.60
   6  -2   0 1141.08   53.25
  -6  -2   0 1177.59   58.96
   6  -2   0 1126.77   54.88
  -6  -2   0 1121.63   55.51
  -6  -2   0 1147.02   53.98
  -6   2  -1 1331.89   62.99
  -6   2  -1 1157.62   58.65
   6   2   1 1247.30   60.27
   6   2   1 1285.22   62.35
   6   2   1 1288.60   67.24
  -6   2  -1 1024.67   60.00
   6   2   1 1278.89   60.62
  -6   2  -1 1251.28   60.02
   6   2   1 1287.32   64.80
  -6  -2  -1 1201.34   61.33
   6  -2   1 1257.44   62.64
  -6  -2  -1 1214.54   65.86
  -6  -2  -1 1254.50   60.35
   6   2   2  862.10   42.88
  -6   2  -2  937.11   46.70
  -6   2  -2  737.59   43.59
   6   2   2  900.80   47.05
   6   2   2  877.50   44.80
   6   2   2  849.29   42.73
  -6   2  -2  838.34   42.58
   6   2   2  909.90   49.47
   6  -2   2  878.20   44.86
  -6  -2  -2  870.82   49.42
  -6  -2  -2  868.25   43.58
   6  -2   2  917.24   46.37
  -6  -2  -2  872.11   42.84
   6   2   3 1182.27   62.29
   6   2   3 1142.27   63.61
  -6   2  -3 1150.78   60.59
   6   2   3 1189.25   57.71
  -6   2  -3 1215.65   57.88
  -6   2  -3 1272.36   62.82
   6   2   3 1157.97   57.92
  -6  -2  -3 1108.91   64.84
   6  -2   3 1156.42   62.06
  -6  -2  -3 1157.66   57.94
  -6  -2  -3 1143.49   58.19
   6  -2   3 1193.17   61.56
  -6  -2  -3 1126.71   63.47
   6   2   4 1625.21   90.89
   6   2   4 1780.69   85.21
  -6   2  -4 1945.27   85.77
  -6   2  -4 1668.48   89.18
   6   2   4 1709.73   85.27
  -6   2  -4 1725.89   90.64
   6   2   4 1634.37   90.03
  -6  -2  -4 1687.90   85.34
   6  -2   4 1712.50   90.34
  -6  -2  -4 1759.60   93.75
  -6  -2  -4 1681.21   91.14
   6  -2   4 1674.29   90.22
   6   2   5  520.69   32.72
  -6   2  -5  571.97   32.88
  -6   2  -5  552.78   33.67
   6   2   5  534.99   33.55
   6   2   5  495.89   26.85
   6   2   5  558.19   27.28
  -6  -2  -5  519.70   27.05
  -6  -2  -5  544.34   33.87
   6  -2   5  546.83   33.74
   6  -2   5  500.88   27.42
   6   2   6  588.92   27.63
  -6   2  -6  661.24   27.78
   6   2   6  569.12   17.08
   6   2   6  635.58   28.69
   6   2   6  617.50   17.95
  -6  -2  -6  616.67   17.39
   6  -2   6  610.12   29.30
   6   2   7  123.08   14.98
   6   2   7  150.08    9.92
   6   2   7  153.90   10.31
   6   2   7  139.78   16.56
   6  -2   7  117.14   17.16
   6  -2   7  146.13    8.65
   6   2   8   54.76   12.98
   6   2   8   80.86   13.25
   6   2   8   87.24    7.17
   6  -2   8   87.93   13.31
   6  -2   8   70.55   15.13
   6  -2   8   75.64    5.78
   6   2   9 1807.39   92.07
   6   2   9 1854.21  103.00
   6   2   9 1832.83  100.99
   6  -2   9 1972.96  105.69
   6  -2   9 1719.83   99.83
   6  -2   9 1914.58   90.95
   6   2  10  136.15   10.41
   6   2  10  143.16   18.50
   6   2  10  149.43   19.79
   6  -2  10  155.74   18.12
   6  -2  10  154.54   23.12
   6   2  11   13.36    4.28
   6   2  11    4.68   10.85
  -6   2 -11    9.38   10.88
   6   2  11   -1.58    8.20
   6  -2  11    5.90   10.82
   6  -2  11    6.54   16.76
  -6  -2 -11   14.41    9.69
   6   2  12  226.40   24.62
   6   2  12  231.84   15.46
   6  -2  12  224.05   30.80
  -6  -2 -12  206.07   22.22
  -6  -2 -13    2.97   10.43
  -6   3  12   -2.09   15.81
   6   3 -12   12.14   11.76
  -6  -3  12   11.87    7.84
  -6  -3  12   22.42   21.21
  -6   3  11  247.28   26.24
  -6   3  11  247.71   17.48
   6   3 -11  252.67   24.25
  -6  -3  11  269.94   32.71
  -6  -3  11  266.43   18.76
   6  -3 -11  257.13   19.90
  -6   3  10  231.78   16.18
   6  -3 -10  256.08   18.82
  -6  -3  10  249.79   17.40
  -6  -3  10  267.26   30.60
  -6   3   9   62.45    7.25
   6  -3  -9   46.76    8.43
  -6  -3   9   50.78    7.99
  -6  -3   9   39.91   17.85
  -6   3   8   11.37    4.07
  -6   3   8   17.33    8.54
   6   3  -8   17.60    8.48
   6  -3  -8   10.09    5.57
   6  -3  -8   21.94    6.94
  -6  -3   8   32.64   15.77
  -6  -3   8   15.79    5.56
  -6   3   7    1.98    3.28
   6   3  -7    2.00    7.15
  -6   3   7    3.14    7.60
   6  -3  -7   -0.51    4.80
  -6  -3   7   -4.62   12.02
   6  -3  -7    0.43    4.69
  -6   3   6  192.17   14.33
   6   3  -6  204.21   17.39
  -6   3   6  195.09   12.75
  -6   3   6  215.72   18.02
   6  -3  -6  210.81   17.80
   6  -3  -6  206.31   13.57
  -6  -3   6  208.90   21.94
   6  -3  -6  190.79   12.28
   6   3  -5  194.66   19.38
  -6   3   5  202.47   13.18
  -6   3   5  237.75   14.95
  -6   3   5  248.64   17.86
   6   3  -5  246.94   17.91
   6   3  -5  220.01   15.71
   6  -3  -5  215.65   17.28
  -6  -3   5  226.36   14.45
   6  -3  -5  216.06   13.50
  -6  -3   5  192.24   20.10
   6   3  -4 1479.00   73.57
  -6   3   4 1487.21   73.37
   6   3  -4 1482.91   77.62
  -6   3   4 1601.20   77.08
  -6   3   4 1427.26   74.10
   6   3  -4 1397.19   79.51
   6  -3  -4 1426.87   76.92
  -6  -3   4 1533.24   80.40
   6  -3  -4 1451.12   73.05
  -6  -3   4 1576.01   74.54
  -6   3   3 1208.96   64.15
  -6   3   3 1250.47   61.79
   6   3  -3 1236.39   67.78
   6   3  -3 1207.36   62.18
  -6   3   3 1236.02   62.57
   6   3  -3 1323.60   65.91
  -6  -3   3 1298.51   63.04
   6  -3  -3 1243.05   61.41
   6  -3  -3 1337.71   65.53
  -6  -3   3 1285.12   67.85
   6   3  -2  698.30   36.77
  -6   3   2  749.69   37.18
  -6   3   2  716.10   37.76
  -6   3   2  723.23   36.10
   6   3  -2  665.07   41.52
   6   3  -2  784.61   39.83
  -6   3   2  719.63   36.76
  -6  -3   2  778.34   37.46
  -6  -3   2  791.46   41.60
  -6  -3   2  693.70   39.28
   6  -3  -2  685.14   35.56
   6   3  -1   41.02    5.56
  -6   3   1   36.25    4.01
  -6   3   1   36.43    5.10
   6   3  -1   18.23    8.20
  -6   3   1   37.96    4.06
  -6   3   1   36.20    3.17
  -6   3   1   34.90    4.66
   6   3  -1   32.63    8.69
   6  -3  -1   35.76    2.98
  -6  -3   1   30.54    6.29
  -6  -3   1   39.72    4.34
  -6  -3   1   37.77    6.65
   6   3   0  348.32   22.68
   6   3   0  372.48   26.08
   6   3   0  369.79   20.33
  -6   3   0  374.25   20.79
  -6   3   0  341.75   18.01
  -6   3   0  337.20   18.62
  -6   3   0  334.76   20.09
  -6  -3   0  343.68   21.63
   6  -3   0  328.22   19.61
  -6  -3   0  356.47   19.60
   6  -3   0  419.37   19.00
  -6  -3   0  334.47   20.88
   6  -3   0  347.70   19.00
   6   3   1 1186.88   59.01
   6   3   1 1287.92   67.35
  -6   3  -1 1307.51   61.08
  -6   3  -1 1264.00   58.34
   6   3   1 1240.32   59.28
  -6   3  -1 1210.76   57.25
  -6   3  -1 1198.23   60.91
   6   3   1 1258.75   62.24
  -6   3  -1 1094.16   57.16
   6  -3   1 1214.87   60.63
  -6  -3  -1 1245.14   59.19
  -6  -3  -1 1262.29   65.29
   6  -3   1 1267.52   59.73
   6  -3   1 1203.93   58.30
  -6  -3  -1 1211.72   60.33
   6   3   2   15.10    6.70
   6   3   2   28.50    3.15
  -6   3  -2   25.41    3.09
   6   3   2   19.94    3.50
   6   3   2   22.18    5.78
  -6   3  -2   28.07    6.57
  -6   3  -2   25.60    6.57
   6   3   2    8.53    7.91
  -6  -3  -2   20.58    4.37
   6  -3   2   25.02    5.94
  -6  -3  -2   20.77    3.30
   6  -3   2   21.23    5.33
  -6  -3  -2   18.84    7.86
   6  -3   2   29.21    3.11
   6   3   3   96.36    6.41
   6   3   3  120.75   12.23
   6   3   3   95.78    7.15
   6   3   3   90.40   12.22
  -6   3  -3   99.63   11.09
   6   3   3   97.31    9.61
  -6   3  -3  100.31    6.87
  -6   3  -3   96.81   10.28
  -6  -3  -3   98.05    7.19
  -6  -3  -3   97.23    7.55
   6  -3   3   95.24    6.81
   6  -3   3   98.50   11.11
  -6  -3  -3   67.21   12.82
   6  -3   3   73.70    9.26
   6   3   4  112.22    8.69
   6   3   4  102.15   12.64
  -6   3  -4  112.23   13.31
   6   3   4  164.90    9.31
  -6   3  -4  153.65    9.82
  -6   3  -4  164.66   12.18
   6   3   4  110.33   13.76
  -6  -3  -4  106.20    8.70
   6  -3   4  121.22   12.21
   6  -3   4  116.33   13.45
   6  -3   4  122.08    8.74
   6   3   5    7.01    3.26
   6   3   5    3.98    6.52
   6   3   5    5.26    7.11
  -6   3  -5    2.37    6.40
   6   3   5    5.47    2.32
   6  -3   5    1.69    0.88
   6  -3   5   -4.01    8.47
   6  -3   5    1.72    5.82
  -6  -3  -5    6.38    2.83
  -6   3  -6   -1.00    8.81
   6   3   6    2.39    2.18
   6   3   6   -1.13    7.30
   6   3   6    2.27    6.70
   6  -3   6    1.19   10.40
   6  -3   6   -2.89    6.76
  -6  -3  -6    1.16    2.58
   6   3   7    5.18    8.31
   6   3   7   -0.59    2.79
   6   3   7    1.19    8.12
   6  -3   7    4.17   11.69
   6  -3   7   -8.97    1.73
   6   3   8  460.96   35.66
   6   3   8  490.10   38.07
   6  -3   8  552.80   27.87
   6  -3   8  592.01   40.96
   6   3   9   21.90   11.52
   6   3   9   20.98   11.42
  -6   3  -9   21.06   10.33
   6   3   9   16.69    4.60
   6  -3   9   19.13   10.76
   6  -3   9   26.97   14.46
   6   3  10  375.45   31.68
  -6   3 -10  410.91   32.52
   6   3  10  443.35   35.76
   6   3  10  415.46   23.95
   6  -3  10  464.76   38.53
   6  -3  10  374.58   30.41
   6   3  11  138.57   21.51
   6   3  11  156.40   12.04
   6   3  11  159.52   19.95
   6  -3  11  166.74   19.30
  -6  -3 -11  165.19   18.12
   6  -3  11  171.69   26.40
   6   3  12   -4.75    4.82
   6  -3  12    7.35   19.11
  -6  -3 -12   -7.95    9.63
  -6   4  12   29.27   14.53
  -6  -4  12   24.41    8.82
  -6   4  11   65.68    8.42
  -6   4  11   34.97   12.94
  -6  -4  11   99.80   26.23
  -6  -4  11   69.06   10.51
   6   4 -10  323.42   25.74
  -6   4  10  274.00   18.29
  -6  -4  10  290.60   20.05
  -6  -4  10  267.04   33.48
  -6   4   9  240.16   16.23
   6   4  -9  256.77   22.99
  -6   4   9  277.71   24.39
  -6  -4   9  228.82   29.77
  -6  -4   9  226.37   17.53
   6  -4  -9  258.47   17.19
  -6   4   8    7.72    3.78
   6   4  -8   10.62    8.73
  -6   4   8   14.22   10.17
  -6  -4   8   27.68   17.11
   6  -4  -8   14.14    4.87
  -6  -4   8    6.65    6.42
  -6   4   7  173.51   17.52
  -6   4   7  182.46   12.34
   6   4  -7  195.56   17.93
   6  -4  -7  175.63   11.98
   6  -4  -7  161.97   11.40
  -6  -4   7  168.93   21.97
  -6  -4   7  165.31   13.49
  -6   4   6  255.37   16.29
   6   4  -6  259.42   21.19
  -6   4   6  274.30   21.31
   6  -4  -6  287.55   15.88
   6  -4  -6  273.88   22.66
  -6  -4   6  277.72   25.57
  -6  -4   6  273.28   17.72
  -6   4   5 2274.23  116.17
  -6   4   5 2254.89  111.66
   6   4  -5 2355.11  117.24
   6  -4  -5 2366.19  117.96
  -6  -4   5 2415.64  121.12
   6  -4  -5 2264.60  110.43
   6   4  -4 2548.67  143.35
  -6   4   4 2916.09  136.74
  -6   4   4 2899.33  140.54
  -6   4   4 2754.18  136.60
  -6   4   4 2955.72  138.81
   6   4  -4 2973.30  141.60
  -6  -4   4 2979.42  144.83
  -6  -4   4 2494.22  137.30
   6  -4  -4 2859.57  135.15
  -6   4   3  101.06    7.33
   6   4  -3   93.25    7.58
   6   4  -3   93.64   10.41
  -6   4   3   92.33    8.54
  -6   4   3   95.13    6.89
   6   4  -3   92.16   14.01
  -6   4   3   91.50    9.46
  -6  -4   3   98.85    8.04
   6  -4  -3   92.57    5.60
  -6  -4   3   99.59   10.71
  -6  -4   3   87.64   12.09
  -6   4   2  132.03    8.93
   6   4  -2  170.59   11.29
  -6   4   2  167.08   10.30
   6   4  -2  155.07   17.96
   6   4  -2  185.55   13.64
  -6   4   2  149.88    9.36
  -6   4   2  168.23   12.75
  -6   4   2  174.86   12.36
   6   4  -2  167.70   16.82
  -6   4   2  180.95   10.36
  -6  -4   2  205.69   16.25
   6  -4  -2  198.51    9.41
  -6  -4   2  194.03   11.67
  -6  -4   2  183.83   13.92
   6   4  -1  183.59   16.41
  -6   4   1  184.64   10.73
   6   4  -1  175.90   11.87
   6   4  -1  194.81   18.51
  -6   4   1  165.55   10.61
   6   4  -1  198.69   13.40
  -6   4   1  184.21   11.50
  -6   4   1  171.64   13.42
  -6   4   1  191.42   13.62
  -6  -4   1  193.47   15.35
   6  -4  -1  188.91   10.18
  -6  -4   1  197.04   14.14
  -6  -4   1  202.33   12.26
  -6   4   0  227.38   12.99
  -6   4   0  242.38   13.17
  -6   4   0  243.45   15.29
   6   4   0  223.80   14.89
  -6   4   0  255.61   13.05
   6   4   0  244.53   18.62
  -6   4   0  227.57   16.58
   6   4   0  280.68   22.47
   6  -4   0  238.76   13.08
  -6  -4   0  241.64   17.26
   6  -4   0  264.64   14.43
  -6  -4   0  251.96   16.50
   6  -4   0  247.55   14.70
  -6  -4   0  244.97   14.63
   6   4   1  437.00   27.29
   6   4   1  440.53   31.32
  -6   4  -1  440.30   26.32
  -6   4  -1  424.83   25.31
   6   4   1  409.76   23.18
  -6   4  -1  429.88   22.15
  -6   4  -1  444.01   21.61
   6  -4   1  431.34   22.35
  -6  -4  -1  429.13   23.45
  -6  -4  -1  411.66   26.18
  -6  -4  -1  416.91   29.68
   6  -4   1  442.52   24.57
  -6  -4  -1  423.46   24.67
   6  -4   1  413.44   24.16
   6   4   2  443.50   32.70
   6   4   2  468.68   24.64
  -6   4  -2  433.67   22.29
  -6   4  -2  496.64   28.78
  -6   4  -2  454.16   27.57
   6   4   2  445.31   31.00
  -6   4  -2  446.20   23.37
   6   4   2  486.43   23.87
   6   4   2  460.53   28.05
  -6  -4  -2  427.72   24.42
  -6  -4  -2  426.28   25.21
   6  -4   2  459.75   26.48
   6  -4   2  446.86   26.58
   6  -4   2  480.75   23.86
  -6   4  -3   44.50    8.78
   6   4   3   29.18    7.17
   6   4   3   35.11    3.50
   6   4   3   34.52    8.95
  -6   4  -3   36.00    9.45
   6   4   3   36.74    4.90
  -6   4  -3   44.64    4.42
   6   4   3   45.45   11.03
  -6  -4  -3   28.43    4.14
   6  -4   3   33.17    6.54
  -6  -4  -3   33.02    5.18
   6  -4   3   31.32    7.80
   6   4   4   36.33    3.77
  -6   4  -4   29.88    9.93
   6   4   4   18.64    9.55
  -6   4  -4   28.75    4.35
   6   4   4   35.50    9.29
  -6   4  -4   34.36    9.00
   6  -4   4   32.33    9.04
  -6  -4  -4   27.01    4.62
   6  -4   4   34.26    7.08
  -6   4  -5   52.50   10.31
   6   4   5   77.16   12.03
   6   4   5   67.43    5.39
   6   4   5   84.79   12.57
   6  -4   5   77.26   10.20
   6  -4   5   79.90   13.75
   6  -4   5   72.86    4.19
  -6  -4  -5   75.03    6.87
   6   4   6   35.90    4.01
   6   4   6   27.15    9.86
   6   4   6   26.76    9.72
   6  -4   6   38.74   13.69
  -6  -4  -6   43.28    5.17
   6  -4   6   43.41    8.88
   6   4   7 1386.96   78.40
   6   4   7 1375.72   68.31
   6   4   7 1452.26   78.18
   6  -4   7 1365.26   75.38
   6  -4   7 1359.10   78.99
  -6   4  -8  207.07   20.40
   6   4   8  203.35   20.81
   6   4   8  208.79   22.20
   6  -4   8  195.37   19.16
   6  -4   8  221.29   24.87
  -6   4  -9  155.81   19.25
   6   4   9  184.70   19.82
   6   4   9  207.10   23.23
   6   4   9  173.61   13.07
   6  -4   9  201.87   25.19
  -6   4 -10   15.70   11.40
   6   4  10    1.95   13.07
   6   4  10    2.11    4.31
   6   4  10   -1.52   11.34
   6  -4  10   -6.13   16.17
   6   4  11    9.22    4.74
   6   4  11    6.37   15.18
   6   4  11    1.60   11.91
   6  -4  11   11.27   18.72
   6   4  12    2.28    4.47
  -6   5  11   86.67   16.96
  -6  -5  11  115.03   13.22
  -6   5  10   18.28    5.28
  -6   5  10   11.35   12.94
   6   5 -10    8.84    9.67
  -6  -5  10    6.86   19.12
  -6  -5  10    8.95    7.71
   6   5  -9   98.43   15.40
  -6   5   9   99.02    9.52
  -6   5   9  126.12   17.50
  -6  -5   9  109.67   11.59
  -6  -5   9  125.17   24.44
  -6   5   8   84.41   13.90
   6   5  -8   69.42   13.40
  -6   5   8   65.84    7.52
  -6  -5   8   59.81    9.17
  -6  -5   8   85.26   20.75
  -6   5   7   11.93    4.28
   6   5  -7   12.70    8.89
  -6   5   7   15.80    8.70
  -6  -5   7   18.83   15.20
  -6  -5   7    9.53    6.14
  -6   5   6   28.64    4.68
   6   5  -6   18.98    8.14
  -6   5   6   26.89    8.28
  -6  -5   6   22.53    5.70
  -6  -5   6   44.87   13.94
  -6   5   5  363.49   24.82
  -6   5   5  378.09   23.72
  -6   5   5  330.46   20.34
   6   5  -5  375.12   25.78
  -6  -5   5  387.20   29.79
  -6  -5   5  377.98   21.90
  -6   5   4   62.05    8.83
  -6   5   4   51.89    8.52
  -6   5   4   63.28    5.89
   6   5  -4   58.30    9.56
  -6  -5   4   64.97   12.67
  -6   5   3  417.76   22.88
  -6   5   3  435.46   25.80
   6   5  -3  437.25   27.01
  -6   5   3  389.46   26.31
  -6  -5   3  425.68   29.76
  -6   5   2   21.08    6.70
  -6   5   2   16.60    3.17
  -6   5   2   19.39    3.12
   6   5  -2   18.07    5.72
   6   5  -2   13.77   10.52
  -6   5   2   15.42    6.57
  -6   5   2   12.08    2.88
  -6   5   2   18.82    3.80
  -6   5   2   16.21    3.09
  -6  -5   2   15.67    7.11
  -6  -5   2   22.08    8.18
   6  -5  -2    4.52    1.15
  -6  -5   2   13.65    3.87
  -6   5   1  878.76   49.70
   6   5  -1  957.94   49.30
  -6   5   1  901.05   47.43
   6   5  -1 1046.48   57.75
  -6   5   1  846.83   45.74
  -6   5   1  850.15   50.57
  -6   5   1  942.46   46.35
   6  -5  -1  968.20   45.51
  -6  -5   1  951.48   52.59
  -6  -5   1  954.40   48.07
  -6  -5   1  847.59   49.59
  -6   5   0  656.22   38.33
  -6   5   0  667.95   33.23
   6   5   0  693.35   44.15
   6   5   0  662.50   35.59
  -6   5   0  663.82   33.50
  -6   5   0  664.73   36.10
  -6  -5   0  645.65   35.17
  -6  -5   0  638.99   38.80
   6  -5   0  676.14   33.36
   6  -5   0  670.47   36.00
  -6  -5   0  632.74   36.72
   6   5   1  127.50    8.95
  -6   5  -1  133.06   11.37
  -6   5  -1  118.87    7.45
   6   5   1  126.59   16.44
  -6   5  -1  118.34    7.50
  -6   5  -1  141.91   14.12
  -6  -5  -1  109.75   11.51
  -6  -5  -1  140.06   10.90
   6  -5   1  120.63   10.41
  -6  -5  -1  119.06    9.10
  -6   5  -2  529.99   26.41
   6   5   2  516.78   26.72
  -6   5  -2  545.31   32.98
   6   5   2  453.84   34.92
   6   5   2  514.37   36.92
  -6   5  -2  518.67   30.93
  -6   5  -2  488.27   25.62
   6  -5   2  528.93   29.31
  -6  -5  -2  505.70   28.77
  -6  -5  -2  514.96   27.95
   6  -5   2  530.39   30.55
  -6   5  -3  778.50   47.31
  -6   5  -3  843.55   46.65
   6   5   3  718.53   48.87
   6   5   3  768.25   51.28
   6   5   3  782.61   40.42
   6  -5   3  779.99   45.60
  -6  -5  -3  728.02   42.00
  -6  -5  -3  790.16   42.66
   6  -5   3  799.95   44.43
  -6   5  -4  258.60   22.77
   6   5   4  266.70   14.60
   6   5   4  239.04   22.20
   6   5   4  233.26   22.80
  -6  -5  -4  231.13   16.10
   6  -5   4  281.30   21.14
   6  -5   4  275.80   19.42
   6   5   5  195.82   20.14
   6   5   5  207.65   20.11
   6   5   5  202.05   11.66
   6  -5   5  221.13   20.27
  -6  -5  -5  185.03   13.28
   6  -5   5  209.80   17.22
   6   5   6  120.91   16.27
   6   5   6  139.52   17.23
  -6   5  -6  122.36   15.80
  -6  -5  -6  148.14   10.64
   6  -5   6  137.62   14.32
   6  -5   6  154.37   18.86
   6   5   7    3.00    9.75
   6   5   7   15.09   10.33
  -6   5  -7   11.73    9.58
   6  -5   7   30.26    9.62
   6  -5   7   13.62   13.98
  -6  -5  -7   19.38    4.99
  -6   5  -8   -1.41    9.70
   6   5   8   -1.42    8.99
   6   5   8    6.52   11.65
   6  -5   8  -10.68    9.52
   6  -5   8   13.84   15.26
  -6   5  -9   94.34   16.29
   6   5   9  115.21   17.68
   6   5   9  119.17   19.02
   6  -5   9  122.40   22.43
   6  -5   9   94.58   14.49
   6   5  10   32.75   16.46
   6   5  10   17.41    5.73
   6   5  10   21.89   13.02
  -6   5 -10   17.89   11.76
   6  -5  10   14.76   19.46
   6  -5  10   49.76   12.79
   6   5  11  217.28   15.95
   6   5  11  217.38   24.24
   6  -5  11  222.23   30.91
  -6   6  11   18.51   14.80
  -6  -6  11   27.73    8.98
  -6   6  10   33.82   15.58
  -6   6  10   30.66    6.55
   6   6 -10   39.00   13.51
  -6  -6  10   21.12    7.94
  -6  -6  10   30.71   19.65
  -6   6   9   74.22    8.50
   6   6  -9   84.12   15.41
  -6   6   9   60.28   15.55
  -6  -6   9   66.25    9.85
  -6  -6   9   67.42   19.81
  -6   6   8   11.65   10.78
   6   6  -8   14.72   10.47
  -6   6   8   13.56    4.91
  -6  -6   8   17.96    6.46
  -6  -6   8   18.01   16.07
  -6   6   7  181.20   19.24
   6   6  -7  188.13   19.05
  -6   6   7  190.56   13.61
  -6  -6   7  218.99   24.68
  -6  -6   7  187.29   14.95
  -6   6   6  871.27   53.80
  -6   6   6  848.90   48.01
   6   6  -6  987.24   55.37
  -6  -6   6 1009.10   49.97
  -6  -6   6 1020.04   60.14
  -6   6   5  727.62   40.72
   6   6  -5  866.11   47.51
  -6   6   5  778.57   46.14
  -6  -6   5  802.89   42.21
  -6  -6   5  836.12   51.46
   6   6  -4    7.27    7.20
  -6   6   4    2.78    6.32
  -6   6   4    7.69    3.17
  -6  -6   4    6.83   10.10
  -6  -6   4    7.63    4.60
  -6   6   3    3.91    6.70
  -6   6   3    8.09    7.01
   6   6  -3    4.01    6.31
  -6   6   3    3.84    3.07
  -6  -6   3    9.04    9.46
  -6   6   2  103.67   12.48
  -6   6   2  109.84    8.22
   6   6  -2  109.41   11.28
  -6   6   2  109.15   12.24
   6   6  -2  136.37   17.94
  -6  -6   2  102.39   13.67
   6   6  -1  357.26   29.17
  -6   6   1  332.94   24.75
  -6   6   1  350.26   18.99
  -6   6   1  328.17   23.86
   6   6  -1  335.02   21.51
  -6  -6   1  356.23   20.70
  -6  -6   1  337.47   22.78
  -6  -6   1  283.17   24.09
   6   6   0  571.17   31.77
  -6   6   0  640.89   36.67
   6   6   0  586.67   41.34
   6  -6   0  576.54   33.02
  -6  -6   0  584.96   31.74
  -6  -6   0  544.66   33.05
  -6  -6   0  571.11   36.17
   6   6   1  360.95   29.72
   6   6   1  321.34   18.40
  -6   6  -1  361.46   25.25
  -6  -6  -1  322.54   23.27
  -6  -6  -1  311.13   20.40
   6  -6   1  297.83   20.73
  -6  -6  -1  311.81   19.07
  -6   6  -2  698.23   43.10
   6   6   2  676.78   35.61
   6   6   2  699.05   47.58
  -6   6  -2  676.30   40.48
  -6   6  -2  738.62   35.42
  -6  -6  -2  665.46   38.06
  -6  -6  -2  690.23   37.45
   6  -6   2  680.14   40.38
   6   6   3 1041.47   50.80
  -6   6  -3 1053.43   60.15
   6   6   3 1048.35   64.39
  -6   6  -3 1017.86   57.20
  -6  -6  -3 1007.16   53.47
   6  -6   3 1078.21   57.53
  -6  -6  -3  976.34   53.06
  -6   6  -4  403.81   27.48
   6   6   4  358.20   30.85
  -6  -6  -4  368.14   22.54
   6  -6   4  389.04   24.90
   6  -6   4  358.82   26.66
   6   6   5  753.20   53.86
   6   6   5  820.17   54.29
  -6   6  -5  880.37   52.28
  -6  -6  -5  873.88   46.25
   6  -6   5  946.18   50.30
   6  -6   5  913.02   53.05
   6   6   6  677.67   48.69
   6   6   6  722.22   48.18
  -6   6  -6  797.49   47.91
   6  -6   6  783.30   49.03
   6  -6   6  771.56   44.96
  -6   6  -7  351.86   28.87
   6   6   7  324.13   28.61
   6   6   7  334.56   30.06
   6  -6   7  381.19   31.55
   6  -6   7  368.16   26.54
  -6   6  -8   21.87   12.23
   6   6   8   57.28   14.71
   6   6   8   17.78   12.93
   6  -6   8   56.73   17.90
   6  -6   8   34.87    9.86
   6   6   9   -6.19   12.50
   6   6   9   -5.74   14.02
  -6   6  -9    4.71   10.71
   6  -6   9   17.37   18.07
   6  -6   9   -1.26    9.26
   6   6  10  116.32   11.40
   6   6  10  122.82   18.93
   6  -6  10  102.85   24.10
  -6  -7  10   94.48   11.64
   6   7  -9    9.13   11.69
  -6   7   9   -6.88   14.08
  -6   7   9    2.37    4.93
  -6  -7   9   -0.72    6.53
   6   7  -8   86.50   15.75
  -6   7   8   89.63    9.20
  -6   7   8   70.57   14.99
  -6  -7   8   73.07   19.31
  -6  -7   8   64.86    9.54
  -6   7   7  294.20   26.41
   6   7  -7  332.95   27.31
  -6   7   7  329.78   20.42
  -6  -7   7  319.47   21.72
  -6  -7   7  345.17   32.23
   6   7  -6  374.56   28.01
  -6   7   6  337.18   21.24
  -6   7   6  309.86   26.46
  -6  -7   6  360.32   22.56
  -6  -7   6  395.12   33.33
  -6   7   5   41.08    9.93
  -6   7   5   63.47    6.94
   6   7  -5   75.25   12.18
  -6  -7   5   52.16   15.59
  -6  -7   5   51.46    7.95
  -6   7   4   47.04   10.09
   6   7  -4   42.17    9.93
  -6   7   4   39.87    5.39
  -6  -7   4   40.16   12.53
  -6  -7   4   33.15    6.32
   6   7  -3  112.08   13.04
  -6   7   3   91.09   13.45
   6   7  -3  120.57   19.38
  -6  -7   3   94.12   15.61
  -6  -7   3  121.51   10.39
   6   7  -2  246.10   25.24
  -6   7   2  168.23   18.52
   6   7  -2  232.34   17.18
  -6  -7   2  199.81   20.47
  -6   7   1   28.98    9.75
   6   7  -1   32.05   13.56
   6   7  -1   36.25    6.99
  -6  -7   1   28.64    9.33
   6   7   0   53.20    6.89
   6   7   0   67.69   15.58
  -6  -7   0   52.14    6.92
  -6  -7   0   53.86    8.88
   6  -7   0   63.23    8.75
  -6  -7   0   61.04   10.69
   6   7   1   28.58   13.68
  -6  -7  -1   30.36    7.35
  -6  -7  -1   32.29    8.91
  -6  -7  -1   19.78    5.05
   6  -7   1   39.34    7.71
   6   7   2  884.35   56.42
  -6  -7  -2  880.39   45.04
  -6  -7  -2  786.71   43.97
   6  -7   2  862.15   47.49
   6   7   3  339.00   31.97
  -6   7  -3  370.79   25.45
  -6  -7  -3  347.73   21.72
   6  -7   3  355.23   25.93
   6   7   4  158.75   21.64
  -6   7  -4  150.55   16.77
   6  -7   4  182.55   17.83
   6   7   5  493.59   39.76
  -6   7  -5  565.46   36.73
   6  -7   5  543.97   37.24
  -6   7  -6  181.72   19.42
   6   7   6  193.69   22.31
   6  -7   6  210.96   21.63
   6   7   7   26.59   12.25
  -6   7  -7   32.02   11.68
   6  -7   7   19.21    8.87
   6  -7   7   12.62   12.26
   6   7   8   35.33   13.82
  -6   7  -8   39.15   13.65
   6  -7   8   28.37   16.23
   6  -7   8   17.47    9.57
  -6   7  -9    8.11   12.30
   6  -7   9   29.32   16.96
   6   8  -8   47.83   14.21
  -6   8   8   54.61    7.92
  -6  -8   8   49.03    8.86
   6   8  -7  299.37   25.82
  -6   8   7  233.42   17.12
  -6  -8   7  307.00   30.65
  -6  -8   7  262.79   18.67
   6   8  -6   94.74   15.19
  -6   8   6   84.00    8.89
  -6  -8   6   84.32   10.21
  -6  -8   6   89.58   18.74
   6   8  -5   12.39    9.82
  -6   8   5    4.09    3.91
  -6   8   5   -1.30    7.69
  -6  -8   5    5.47   13.25
  -6  -8   5    8.44    5.50
  -6   8   4  180.06   12.85
  -6   8   4  139.98   17.37
   6   8  -4  215.05   25.87
   6   8  -4  179.86   17.78
  -6  -8   4  142.44   20.78
  -6  -8   4  183.35   14.20
   6   8  -3  152.24   15.14
  -6   8   3  145.24   17.26
  -6  -8   3  142.00   18.76
  -6  -8   3  126.22   11.89
  -6   8   2  149.98   17.83
   6   8  -2  152.12   21.92
  -6  -8   2  150.59   12.51
  -6  -8   2  170.91   19.35
  -6   8   1  100.55   16.31
   6   8  -1  111.21   19.72
  -6  -8   1  102.74    9.95
  -6  -8   1   92.18   14.76
  -6  -8   0 1087.18   64.51
   6  -8   0 1087.10   60.91
   6   8   1   60.09   16.69
   6  -8   1   47.98    9.50
   6   8   2  392.58   34.93
   6  -8   2  306.01   24.04
  -6  -8  -2  351.73   22.10
   6   8   3   32.52   15.62
   6  -8   3   -3.22    7.88
   6   8   4   84.61   18.36
   6  -8   4   84.45   13.99
   6   8   5  381.41   34.30
   6  -8   5  416.74   31.46
   6   8   6   39.26   14.56
   6  -8   6    5.97   10.89
  -6   8  -7   15.78   11.72
   6   8   7   40.13   14.96
   6  -8   7   13.17   12.11
  -6   8  -8    9.31   11.94
   6  -8   8   16.17   13.92
  -6  -9   7   88.48   11.30
  -6   9   6  660.11   38.00
  -6  -9   6  701.76   39.59
  -6   9   5    2.82    4.14
  -6  -9   5    2.80    5.50
  -6  -9   5   -3.81   12.88
   6   9  -4  665.09   50.38
  -6   9   4  583.73   33.01
  -6  -9   4  575.10   43.60
  -6  -9   4  585.15   34.42
   6   9  -3  404.26   38.46
  -6  -9   3  394.24   24.73
  -6  -9   3  357.77   31.94
   6   9  -2   18.35   16.67
  -6  -9   2   10.96    5.71
  -6  -9   2    3.04   10.18
   6   9  -1   20.49   16.96
  -6  -9   1   14.46    9.78
  -6  -9   1    8.34    5.58
  -6  -9   0   45.64    7.61
  -6  -9   0   29.56   11.43
   6   9   1   40.37   18.21
   6   9   1   21.49   15.90
   6  -9   1   39.03    9.53
   6   9   2  -13.67   15.98
   6   9   2    2.27   16.78
   6  -9   2   -1.06    8.71
   6   9   3  374.39   35.29
   6   9   3  354.00   36.75
   6  -9   3  376.84   28.28
   6   9   4   12.63   15.69
   6   9   4    8.55   14.30
   6  -9   4    9.05    9.40
   6   9   5   19.54   15.13
   6  -9   5    1.44   10.31
   6  -9   6  284.92   27.57
   6  -9   7   36.29   15.17
  -6 -10   3   15.14    6.72
   6  10  -2    5.14   19.45
  -6 -10   2    7.88    5.96
   6  10  -1  225.47   30.49
  -6 -10   1  184.46   15.44
   6  10   0  238.67   32.06
  -6 -10   0  230.44   17.67
   6  10   1  117.66   23.81
   6 -10   1  124.96   15.52
   6  10   2   15.00   18.76
   6 -10   2   -3.54    8.72
   6  10   3  184.85   29.26
   6 -10   3  231.74   21.65
   6 -10   4   88.21   15.12
   6 -10   5  251.75   24.52
   7   0 -13    1.35   10.27
   7   0 -12  240.37   23.01
  -7   0  12  310.25   33.60
  -7   0  12  264.26   19.00
   7   0 -11    2.33    8.53
  -7   0  11    2.08   16.26
  -7   0  10  299.66   29.50
   7   0 -10  269.89   22.24
  -7   0   9    1.52    4.08
   7   0  -9    0.84    7.82
  -7   0   9   -9.99   12.50
   7   0  -9   -1.95    7.66
  -7   0   8  486.07   27.68
   7   0  -8  485.49   31.49
  -7   0   8  541.85   37.43
   7   0  -8  489.87   30.37
  -7   0   7    0.41    2.92
   7   0  -7    7.04    8.46
   7   0  -7   16.91    6.98
  -7   0   7    7.63   10.90
   7   0  -7   -0.62    5.35
   7   0  -6  562.01   33.42
  -7   0   6  552.06   35.42
  -7   0   6  527.24   28.49
  -7   0   6  515.54   32.08
   7   0  -6  488.26   31.30
   7   0  -6  540.77   29.80
  -7   0   5   -0.65    2.49
  -7   0   5   -1.79    6.62
   7   0  -5   -1.53    3.80
  -7   0   5   -1.94    5.78
   7   0  -5    1.25    4.41
   7   0  -5    4.24    6.51
   7   0  -4 5012.36  239.39
  -7   0   4 5060.52  241.19
  -7   0   4 4862.07  239.28
   7   0  -4 4648.06  238.83
   7   0  -4 4915.92  236.74
   7   0  -4 4790.84  236.33
  -7   0   4 5146.61  236.95
  -7   0   3   -0.25    2.44
   7   0  -3    1.35    3.52
   7   0  -3   -0.62    1.98
   7   0  -3    4.84    5.24
  -7   0   3    2.11    6.04
   7   0  -3    0.35    3.32
  -7   0   3    2.93    4.77
   7   0  -2   14.12    5.56
  -7   0   2   22.42    5.23
   7   0  -2   14.52    2.51
  -7   0   2   16.64    2.98
   7   0  -2   17.43    4.49
  -7   0   2   21.30    5.36
  -7   0   1   -0.18    2.48
  -7   0   1    1.81    3.83
   7   0  -1    4.01    3.19
  -7   0   1   -1.97    5.07
   7   0  -1    1.38    1.65
  -7   0   1   -1.42    2.24
   7   0  -1   -2.97    4.73
  -7   0   0    4.08    6.05
   7   0   0    8.06    5.69
   7   0   0    3.11    2.53
   7   0   0    0.27    1.78
  -7   0   0    4.95    2.10
   7   0   0    5.52    2.30
  -7   0   0    2.70    3.24
   7   0   1    2.99    4.90
   7   0   1    0.84    1.70
  -7   0  -1   -0.54    2.64
   7   0   1   -0.70    2.19
  -7   0  -1   -3.51    6.99
  -7   0  -1   -0.51    1.66
   7   0   1   -0.35    1.88
   7   0   2 4951.12  256.49
   7   0   2 5400.77  251.28
  -7   0  -2 5515.74  257.95
   7   0   2 5360.92  252.23
  -7   0  -2 5088.56  253.76
  -7   0  -2 5277.68  251.23
   7   0   2 5075.26  253.71
  -7   0  -2 5082.94  252.45
   7   0   3    0.54    4.24
   7   0   3    0.48    1.52
  -7   0  -3   -1.67    2.36
  -7   0  -3   -0.83    6.79
  -7   0  -3    1.98    4.76
   7   0   3    0.54    1.86
   7   0   4  604.57   33.73
  -7   0  -4  605.01   36.08
   7   0   4  564.01   29.41
   7   0   4  564.61   28.44
  -7   0  -4  603.07   33.24
  -7   0  -5    0.75    5.99
   7   0   5    2.87    6.27
   7   0   5   -1.29    1.86
   7   0   5   -1.16    2.00
   7   0   5    0.79    5.47
   7   0   6   71.94    6.11
  -7   0  -6   74.10   10.59
   7   0   6   71.84    5.36
   7   0   6   53.62    9.10
   7   0   6   69.12   11.07
   7   0   6   70.77    5.23
   7   0   7    0.44    2.00
   7   0   7   -1.16    7.39
   7   0   7   -0.37    2.56
   7   0   7    0.24    2.59
   7   0   7   -2.79    6.27
   7   0   8 6166.01  295.76
   7   0   8 6546.45  296.22
   7   0   8 5941.41  305.17
   7   0   9    2.80    7.94
   7   0   9   -0.57    2.56
   7   0   9    8.82   10.13
   7   0  10  269.39   27.07
   7   0  10  224.70   24.03
   7   0  10  264.85   15.58
  -7   0 -11   -1.49   10.58
   7   0  11   10.47   15.22
   7   0  11    9.72   11.26
  -7   0 -12  290.56   28.38
   7   0  12  378.03   36.99
   7  -1 -13   11.32   10.52
   7   1 -12    1.35   10.57
  -7   1  12   -4.48   17.71
  -7  -1  12    9.49   18.36
  -7  -1  12    7.58    6.32
   7  -1 -12   -1.16    9.15
  -7   1  11   -2.02   14.47
   7   1 -11   16.34   10.52
  -7  -1  11   15.41    6.05
   7  -1 -11   19.34    9.93
  -7  -1  11   12.96   18.40
  -7   1  10    4.36    4.63
   7   1 -10    9.27    8.98
  -7   1  10    3.63   13.85
  -7  -1  10    3.90   15.67
   7  -1 -10   20.74    8.67
  -7   1   9   40.81    6.19
  -7   1   9   33.82   13.69
   7   1  -9   43.48   10.09
  -7  -1   9   52.44   16.41
   7  -1  -9   55.81   10.21
   7  -1  -9   38.03    8.70
  -7   1   8 1904.22   96.92
   7   1  -8 1872.40  101.62
  -7   1   8 1996.24  106.18
   7  -1  -8 2019.83   99.16
  -7  -1   8 1901.35  107.03
   7  -1  -8 1989.78  100.41
  -7  -1   8 1981.75   97.60
  -7   1   7   26.24    4.34
  -7   1   7   30.31   11.19
  -7   1   7   20.75    8.02
   7   1  -7   39.68    8.67
   7   1  -7   17.92    7.01
  -7  -1   7   10.84   11.74
  -7  -1   7   22.10    4.79
   7  -1  -7   31.29    9.09
   7  -1  -7   26.76    7.08
   7  -1  -7   26.65    6.23
   7   1  -6  104.35   12.26
  -7   1   6  142.23   13.47
   7   1  -6  183.13   14.89
   7   1  -6  152.05   12.54
  -7   1   6  151.59   15.94
  -7   1   6  149.78   10.70
   7  -1  -6  146.52   12.86
  -7  -1   6  147.47   17.41
   7  -1  -6  176.76   14.85
  -7  -1   6  170.12   11.27
   7  -1  -6  164.41   11.71
   7   1  -5   31.75    5.45
   7   1  -5   29.09    7.26
  -7   1   5   38.32    7.20
  -7   1   5   29.28    4.06
  -7   1   5   20.88    8.21
   7   1  -5   24.60    3.89
   7  -1  -5   18.73    6.60
  -7  -1   5   30.86    4.53
   7  -1  -5   25.26    5.59
  -7  -1   5   31.15    7.61
   7  -1  -5   23.55    3.90
   7  -1  -5   32.22    4.74
  -7  -1   5   35.09   10.06
  -7   1   4 1961.12  100.32
   7   1  -4 1906.26  100.77
  -7   1   4 2012.28   96.81
  -7   1   4 1810.77   98.66
   7  -1  -4 2065.82   99.21
   7  -1  -4 2190.28   98.19
   7  -1  -4 2004.52   98.60
  -7  -1   4 1921.09   99.83
   7  -1  -4 1906.30   96.22
   7  -1  -4 1914.85   96.42
  -7  -1   4 2039.59   97.30
  -7  -1   4 2028.43  102.07
  -7   1   3  917.74   49.16
  -7   1   3  896.85   48.83
   7   1  -3 1048.65   52.24
   7   1  -3  927.00   50.45
  -7   1   3  975.84   47.07
   7   1  -3  869.01   49.46
   7  -1  -3  985.96   48.50
   7  -1  -3  920.40   46.75
   7  -1  -3  900.06   48.10
  -7  -1   3  883.89   49.65
  -7  -1   3  963.29   47.49
  -7  -1   3  931.29   50.74
   7   1  -2 2106.87  106.71
  -7   1   2 2042.84  105.61
  -7   1   2 2151.64  103.89
   7   1  -2 2343.88  109.45
  -7   1   2 2271.07  104.80
   7   1  -2 2133.76  104.00
   7   1  -2 2194.12  106.38
   7  -1  -2 2152.74  105.55
  -7  -1   2 1941.52  106.02
  -7  -1   2 2076.37  106.51
   7  -1  -2 2268.27  105.08
  -7  -1   2 2224.27  104.55
   7  -1  -2 2144.24  103.70
   7  -1  -2 2004.14  103.99
   7   1  -1    8.73    5.84
   7   1  -1    7.44    2.37
  -7   1   1    1.26    3.48
   7   1  -1    6.67    5.74
  -7   1   1    5.89    4.48
   7   1  -1    3.51    2.83
  -7   1   1    8.02    2.02
  -7  -1   1    3.32    4.13
   7  -1  -1    9.21    2.38
  -7  -1   1    8.60    6.68
   7  -1  -1    5.09    3.57
   7  -1  -1    3.21    1.69
  -7  -1   1    5.37    2.79
  -7  -1   1    7.93    3.68
  -7   1   0   86.02    9.67
   7   1   0   92.35    7.13
  -7   1   0  100.94    5.93
   7   1   0   92.50    6.48
  -7   1   0  109.66    7.37
   7   1   0   91.40    7.80
   7   1   0   78.68   10.44
  -7  -1   0   96.30    6.37
  -7  -1   0   96.03   11.30
  -7  -1   0   97.45    7.14
   7  -1   0   89.70    5.53
   7  -1   0   80.65    8.37
  -7  -1   0   90.26    8.05
   7   1   1  691.08   35.65
   7   1   1  727.38   37.08
  -7   1  -1  678.53   38.32
  -7   1  -1  688.30   35.05
   7   1   1  684.51   34.47
   7   1   1  724.73   35.12
  -7   1  -1  728.47   33.60
  -7   1  -1  585.57   34.01
  -7  -1  -1  707.05   34.55
  -7  -1  -1  626.44   35.65
  -7  -1  -1  701.37   40.40
   7  -1   1  691.57   33.46
   7  -1   1  664.76   37.62
   7   1   2    4.28    1.96
   7   1   2    5.66    3.92
  -7   1  -2    2.58    6.45
  -7   1  -2    5.32    2.30
   7   1   2    0.99    1.99
  -7   1  -2    2.56    0.78
  -7   1  -2    1.69    3.22
   7   1   2    0.32    3.46
   7  -1   2   16.55    4.27
   7  -1   2    1.44    1.98
  -7  -1  -2    4.45    7.99
   7  -1   2    1.50    0.77
  -7  -1  -2    1.51    1.70
   7  -1   2    3.03    5.10
  -7   1  -3    0.43    4.48
   7   1   3    3.05    2.02
   7   1   3   -0.58    4.35
  -7   1  -3    5.12    7.06
   7   1   3    3.84    2.14
  -7   1  -3    4.84    2.29
   7  -1   3   -0.52    4.87
   7  -1   3    5.84    5.65
   7  -1   3    4.70    1.05
   7  -1   3    6.55    1.98
  -7  -1  -3    1.94    8.11
  -7  -1  -3    1.79    1.69
  -7  -1  -3    5.11    5.86
   7   1   4 2205.19  106.78
  -7   1  -4 2314.88  110.30
   7   1   4 2190.06  111.38
   7   1   4 2199.96  106.26
   7   1   4 2119.34  112.87
  -7   1  -4 2135.45  106.71
  -7   1  -4 2292.41  112.93
   7  -1   4 2034.91  111.78
  -7  -1  -4 2257.26  111.57
  -7  -1  -4 2303.17  115.00
   7  -1   4 2207.82  105.16
   7  -1   4 2057.39  110.47
  -7  -1  -4 2220.02  106.91
   7  -1   4 2207.18  106.93
   7   1   5  315.71   16.39
   7   1   5  277.48   16.55
   7   1   5  350.97   22.85
   7   1   5  276.66   22.21
  -7   1  -5  295.24   20.96
   7  -1   5  301.49   15.29
  -7  -1  -5  281.89   21.74
   7  -1   5  301.64   17.04
   7  -1   5  288.88   21.79
  -7  -1  -5  300.33   16.86
   7   1   6 1313.96   75.79
  -7   1  -6 1495.25   75.34
   7   1   6 1470.57   76.83
   7   1   6 1432.07   68.68
   7   1   6 1358.60   69.16
   7  -1   6 1386.65   76.08
   7  -1   6 1395.93   69.50
   7  -1   6 1445.30   67.78
   7  -1   6 1346.19   67.56
  -7  -1  -6 1506.19   76.12
   7   1   7  252.18   13.77
   7   1   7  213.22   20.49
   7   1   7  222.26   13.29
   7   1   7  203.73   20.21
   7   1   7  208.97   13.67
   7  -1   7  232.61   20.74
   7  -1   7  190.82   20.75
   7  -1   7  224.50   12.36
   7  -1   7  231.85   12.68
   7   1   8  108.78   14.75
   7   1   8  104.81    7.92
   7   1   8   82.88   14.19
   7   1   8  113.93    8.48
   7  -1   8   91.33   14.52
   7  -1   8   91.00   16.39
   7  -1   8  102.00    7.12
   7  -1   8  124.04    7.78
   7   1   9   68.81   11.77
   7   1   9   44.58    5.35
   7   1   9   44.65   12.20
   7  -1   9   46.02   15.15
   7  -1   9   52.85   12.65
   7  -1   9   55.61    4.93
   7   1  10   56.09   12.94
   7   1  10   77.10   14.76
   7   1  10   61.85    6.16
   7  -1  10   80.47   14.28
   7  -1  10   54.06   16.21
   7   1  11  195.43   24.33
  -7   1 -11  209.69   23.35
   7   1  11  253.04   25.19
   7   1  11  247.23   15.23
   7  -1  11  253.94   29.36
   7  -1  11  219.20   23.36
   7   1  12   19.87   16.72
   7  -1  12   14.25   19.60
  -7  -1 -12   12.38   11.91
   7   2 -12   -4.33   10.58
  -7   2  12   -4.42   17.49
  -7  -2  12    9.24    6.63
   7  -2 -12    3.20    8.45
  -7  -2  12   17.03   20.19
   7   2 -11  766.08   49.06
  -7   2  11  720.61   54.42
  -7   2  11  789.43   42.86
  -7  -2  11  785.85   43.60
   7  -2 -11  757.32   46.05
  -7  -2  11  750.00   57.05
  -7   2  10  225.10   26.21
  -7   2  10  219.30   16.22
   7   2 -10  259.95   22.50
  -7  -2  10  256.84   17.45
  -7  -2  10  218.43   28.38
   7  -2 -10  250.62   19.61
   7   2  -9  333.40   26.91
  -7   2   9  378.63   31.33
  -7   2   9  357.00   21.67
  -7  -2   9  401.19   35.04
   7  -2  -9  366.59   24.62
  -7   2   8  725.99   39.31
   7   2  -8  731.50   44.48
  -7   2   8  677.81   46.10
   7  -2  -8  798.83   40.83
   7  -2  -8  749.76   41.84
  -7  -2   8  733.38   49.95
  -7   2   7  215.44   16.61
  -7   2   7  203.14   13.38
  -7   2   7  177.81   17.65
  -7  -2   7  221.34   22.88
   7  -2  -7  202.60   13.92
   7  -2  -7  228.87   18.62
  -7  -2   7  201.71   14.15
   7  -2  -7  200.71   15.37
  -7   2   6  567.09   39.42
  -7   2   6  701.89   39.57
   7   2  -6  711.68   39.24
  -7   2   6  676.79   36.65
   7   2  -6  689.74   43.09
  -7  -2   6  731.08   37.72
   7  -2  -6  716.44   40.79
   7  -2  -6  760.63   36.59
   7  -2  -6  710.45   38.56
  -7  -2   6  689.21   45.10
   7   2  -5 2058.28  105.71
  -7   2   5 2112.55  101.29
  -7   2   5 2069.36  103.51
   7   2  -5 2070.03  107.56
   7   2  -5 2047.09  102.89
   7  -2  -5 2146.94  104.68
  -7  -2   5 2152.39  102.22
   7  -2  -5 2032.47  100.12
   7  -2  -5 2132.79  101.44
   7  -2  -5 2226.17  102.92
  -7  -2   5 2201.23  109.60
  -7   2   4 1219.61   66.81
  -7   2   4 1212.74   65.09
   7   2  -4 1172.50   69.96
   7   2  -4 1138.98   65.04
   7   2  -4 1250.95   68.90
  -7  -2   4 1286.20   66.10
  -7  -2   4 1210.72   70.62
   7  -2  -4 1297.33   66.16
  -7  -2   4 1155.51   68.45
   7  -2  -4 1294.22   67.53
   7  -2  -4 1239.00   65.27
   7   2  -3  327.39   24.61
  -7   2   3  358.97   20.15
   7   2  -3  423.64   26.64
  -7   2   3  322.58   20.77
  -7   2   3  333.29   21.45
   7   2  -3  379.34   23.40
  -7  -2   3  354.58   23.31
   7  -2  -3  384.90   20.83
  -7  -2   3  400.43   21.32
   7  -2  -3  464.71   22.50
   7  -2  -3  405.60   20.38
  -7  -2   3  359.16   24.71
   7   2  -2  158.41   14.73
  -7   2   2  162.19   11.46
   7   2  -2  169.54   12.62
   7   2  -2  210.12   16.51
  -7   2   2  134.33    9.84
  -7   2   2  172.07    9.89
   7  -2  -2  168.87   10.28
   7  -2  -2  176.60   11.11
  -7  -2   2  183.13   11.19
   7  -2  -2  179.62   10.03
  -7  -2   2  165.52   13.39
  -7  -2   2  176.34   13.31
  -7   2   1  103.08    8.22
  -7   2   1   82.56    7.26
   7   2  -1   89.92   10.21
   7   2  -1  103.04   12.12
   7   2  -1   95.70    7.14
   7   2  -1  105.76    8.46
  -7   2   1   93.58    5.96
   7  -2  -1   93.52    6.35
   7  -2  -1   98.82    7.24
  -7  -2   1   94.19    7.00
   7  -2  -1   99.42    6.08
  -7  -2   1   89.11    8.83
   7   2   0    8.27    5.08
   7   2   0   18.05    3.41
  -7   2   0   15.60    3.18
  -7   2   0   17.48    1.90
   7   2   0   19.67    3.93
  -7   2   0   13.85    4.85
   7  -2   0   16.60    1.93
  -7  -2   0   22.34    8.12
  -7  -2   0   22.11    3.16
  -7  -2   0    7.53    4.03
   7  -2   0   13.96    2.25
   7  -2   0   17.63    4.30
  -7   2  -1  339.54   21.18
  -7   2  -1  336.42   16.84
   7   2   1  376.46   22.80
   7   2   1  355.34   18.93
   7   2   1  335.02   18.41
   7   2   1  340.81   20.42
  -7   2  -1  287.49   17.91
  -7   2  -1  349.21   18.43
   7  -2   1  360.45   21.15
  -7  -2  -1  357.66   18.62
   7  -2   1  383.52   18.56
  -7  -2  -1  336.78   24.05
  -7  -2  -1  331.94   19.80
  -7   2  -2 2591.26  122.07
  -7   2  -2 2714.45  126.36
   7   2   2 2635.20  129.55
   7   2   2 2569.31  126.37
  -7   2  -2 2520.87  123.26
   7   2   2 2475.97  122.04
   7   2   2 2516.04  122.18
   7   2   2 2448.19  124.01
   7  -2   2 2553.26  123.61
   7  -2   2 2489.65  122.07
  -7  -2  -2 2467.89  128.88
  -7  -2  -2 2458.10  123.10
   7  -2   2 2446.64  125.54
  -7  -2  -2 2559.25  122.14
  -7   2  -3   10.74    5.24
   7   2   3   29.49    6.62
   7   2   3   22.40    3.39
   7   2   3   16.88    7.11
  -7   2  -3   21.16    7.81
   7   2   3   19.07    5.33
   7   2   3   22.97    2.96
  -7   2  -3   21.70    3.16
   7  -2   3   20.42    6.31
  -7  -2  -3   15.78    3.74
   7  -2   3   19.29    5.97
  -7  -2  -3   19.06    2.94
  -7  -2  -3   26.82    9.79
   7   2   4  749.19   34.78
  -7   2  -4  680.42   37.93
   7   2   4  621.54   38.76
   7   2   4  674.15   40.73
   7   2   4  661.49   34.15
  -7   2  -4  680.62   40.16
  -7   2  -4  641.95   34.11
  -7  -2  -4  623.94   42.24
   7  -2   4  682.80   39.02
  -7  -2  -4  623.73   34.38
  -7  -2  -4  599.39   39.62
   7  -2   4  601.24   38.73
   7   2   5  482.58   22.97
   7   2   5  402.24   28.19
   7   2   5  445.34   22.64
  -7   2  -5  487.91   28.22
   7   2   5  463.40   30.02
   7  -2   5  468.00   29.34
   7  -2   5  467.11   23.36
   7  -2   5  435.57   20.60
  -7  -2  -5  482.88   23.24
  -7  -2  -5  455.69   29.89
   7  -2   5  477.60   29.55
   7  -2   5  386.18   20.56
   7   2   6 1679.57   89.19
  -7   2  -6 1758.01   87.96
   7   2   6 1749.84   81.69
   7   2   6 1694.66   81.63
   7   2   6 1631.56   89.35
   7  -2   6 1651.63   82.13
   7  -2   6 1751.40   89.94
   7  -2   6 1607.88   79.66
   7   2   7  564.91   28.10
   7   2   7  525.12   26.72
   7   2   7  575.19   15.71
   7  -2   7  555.01   28.93
   7   2   8  318.12   26.64
   7   2   8  298.83   18.74
   7   2   8  328.22   27.80
   7   2   8  312.28   18.78
   7  -2   8  343.01   17.36
   7  -2   8  366.78   29.81
   7   2   9   56.81   14.23
   7   2   9   52.79   12.57
   7   2   9   58.56    6.19
   7  -2   9   65.17    5.34
   7  -2   9   46.22   12.22
   7  -2   9   88.52   16.02
   7   2  10  339.76   29.30
   7   2  10  304.29   29.26
   7   2  10  342.94   20.04
   7  -2  10  296.41   27.37
   7   2  11   49.53   10.87
   7   2  11   35.93   13.53
  -7   2 -11   13.09   11.34
   7   2  11   24.30    5.03
   7  -2  11   23.94   16.39
   7  -2  11   41.38   12.29
   7  -2  12  487.88   43.78
  -7  -2 -12  473.71   35.83
  -7   3  12   19.30   16.49
  -7  -3  12   11.71    7.70
  -7   3  11   51.05    7.88
  -7   3  11   48.84   16.81
   7   3 -11   80.08   14.90
  -7  -3  11   59.90   22.40
  -7  -3  11   64.10    9.65
  -7   3  10  261.80   26.84
   7   3 -10  316.16   26.80
  -7   3  10  304.23   19.93
  -7  -3  10  321.07   34.66
  -7  -3  10  332.55   21.46
   7  -3 -10  304.06   21.96
  -7   3   9    4.49    4.01
  -7   3   9    4.70    8.02
  -7  -3   9    3.85   16.38
  -7  -3   9    3.50    6.07
   7  -3  -9   -0.69    5.85
  -7   3   8    5.91    6.91
   7   3  -8    6.76    7.90
  -7   3   8    2.27    3.72
   7  -3  -8    0.61    5.13
  -7  -3   8   -1.74   14.79
  -7   3   7   12.08    7.48
   7   3  -7   12.37    7.18
  -7   3   7    9.75    3.50
  -7  -3   7   15.75   14.22
   7  -3  -7   15.77    4.12
   7  -3  -7    5.21    4.57
   7   3  -6    2.83    6.81
  -7   3   6    6.21    3.00
  -7   3   6   -1.68    5.71
  -7   3   6    3.52    5.71
   7  -3  -6    6.92    3.84
  -7  -3   6    5.55    4.88
  -7  -3   6   16.41   11.57
   7  -3  -6    9.60    8.13
  -7   3   5  222.10   15.60
   7   3  -5  225.80   20.93
   7   3  -5  218.56   15.88
   7   3  -5  251.70   18.57
  -7   3   5  212.29   13.73
  -7   3   5  232.00   17.64
   7  -3  -5  244.88   14.38
  -7  -3   5  225.39   15.23
  -7  -3   5  262.06   22.11
   7  -3  -5  260.48   18.51
   7   3  -4  103.34   14.12
  -7   3   4   94.96   10.00
  -7   3   4  101.52    7.65
  -7   3   4  105.37    9.02
   7   3  -4  118.84   11.85
   7   3  -4  112.18    8.15
   7  -3  -4  129.48   11.53
  -7  -3   4  112.93   14.27
   7  -3  -4  110.01    7.79
  -7  -3   4  104.91    8.94
   7   3  -3  215.89   13.68
   7   3  -3  243.53   17.09
  -7   3   3  224.07   13.10
   7   3  -3  226.05   19.04
  -7   3   3  196.85   14.79
  -7   3   3  226.14   14.39
  -7  -3   3  241.20   14.71
   7  -3  -3  236.90   16.26
   7  -3  -3  237.67   13.00
  -7  -3   3  230.54   18.48
  -7   3   2 1632.38   83.30
   7   3  -2 1632.21   87.96
  -7   3   2 1690.11   82.35
   7   3  -2 1773.61   85.98
  -7   3   2 1720.21   83.07
  -7   3   2 1569.33   83.49
   7  -3  -2 1696.12   82.11
  -7  -3   2 1869.65   88.01
  -7  -3   2 1723.27   83.84
  -7   3   1  979.47   52.23
  -7   3   1 1078.78   52.54
  -7   3   1 1047.72   51.39
   7   3  -1 1025.82   56.36
  -7   3   1  959.03   52.20
   7   3  -1 1107.09   54.63
  -7   3   1 1011.95   52.34
  -7  -3   1 1044.85   54.99
  -7  -3   1 1120.95   56.16
   7  -3  -1 1096.04   51.55
  -7  -3   1 1068.97   53.08
   7   3   0  230.98   14.59
  -7   3   0  243.97   14.17
  -7   3   0  252.54   13.13
   7   3   0  254.09   15.51
  -7   3   0  261.10   15.84
   7   3   0  238.28   17.76
  -7   3   0  222.14   14.66
  -7   3   0  263.98   15.28
   7   3   0  202.02   20.55
  -7  -3   0  255.40   16.69
   7  -3   0  287.78   14.22
   7  -3   0  237.29   15.05
  -7  -3   0  245.85   16.91
  -7  -3   0  250.90   14.87
  -7   3  -1 1815.35   88.28
  -7   3  -1 2085.73   91.82
   7   3   1 2034.40   90.86
  -7   3  -1 1891.92   88.30
  -7   3  -1 2077.58   89.93
   7   3   1 2247.82   98.18
   7   3   1 2047.48   94.10
   7   3   1 2138.28  100.63
   7   3   1 2016.98   90.54
  -7   3  -1 2127.72   93.19
   7  -3   1 2098.65   92.78
  -7  -3  -1 2081.59   90.79
   7  -3   1 2086.83   89.86
  -7  -3  -1 2157.97   98.01
  -7  -3  -1 1913.59   91.99
   7   3   2  241.19   21.15
   7   3   2  205.70   15.86
   7   3   2  221.99   13.72
  -7   3  -2  239.17   17.11
   7   3   2  242.49   13.56
   7   3   2  210.74   18.11
  -7   3  -2  232.86   15.64
  -7   3  -2  231.93   13.28
   7  -3   2  236.68   16.55
  -7  -3  -2  213.64   14.58
   7  -3   2  228.85   15.22
  -7  -3  -2  222.36   13.71
  -7  -3  -2  235.68   20.17
   7  -3   2  257.88   13.57
   7   3   3  409.44   26.27
   7   3   3  364.96   20.39
   7   3   3  347.12   19.63
  -7   3  -3  364.68   19.86
   7   3   3  369.29   23.16
  -7   3  -3  391.11   24.94
   7   3   3  376.23   27.13
   7  -3   3  389.83   23.95
  -7  -3  -3  348.52   20.29
   7  -3   3  349.20   20.02
  -7  -3  -3  332.58   20.80
  -7  -3  -3  390.06   27.97
   7  -3   3  371.46   23.95
   7   3   4  789.40   41.27
   7   3   4  823.53   44.66
  -7   3  -4  727.00   44.12
  -7   3  -4  797.82   46.42
   7   3   4  784.64   46.80
   7   3   4  915.44   41.27
   7   3   4  780.38   48.25
   7  -3   4  749.48   45.53
   7  -3   4  777.82   45.78
   7  -3   4  772.12   41.12
  -7  -3  -4  750.56   41.52
   7   3   5   87.83    7.24
  -7   3  -5   87.02   12.03
   7   3   5   87.99    6.57
   7   3   5   83.10   12.50
   7   3   5  100.44   12.39
   7  -3   5  109.21   12.25
   7  -3   5   93.15   13.22
  -7  -3  -5   90.36    7.52
   7   3   6  688.20   41.42
   7   3   6  710.78   33.10
   7   3   6  699.17   41.34
   7  -3   6  717.77   41.86
   7  -3   6  610.18   30.68
   7  -3   6  685.21   40.11
   7   3   7  203.61   20.33
   7   3   7  211.93   13.00
   7   3   7  234.24   21.11
   7  -3   7  198.01   21.87
   7  -3   7  184.98   18.80
   7   3   8    2.16    3.07
   7   3   8    4.03    8.80
   7   3   8   12.23   10.02
   7  -3   8   22.08   13.09
   7   3   9   19.21   11.45
   7   3   9   37.69   13.92
   7   3   9   30.55    4.99
   7  -3   9   46.42   16.18
   7   3  10   29.67   12.23
  -7   3 -10   20.55   11.54
   7   3  10   13.18   13.26
   7   3  10   21.99    5.05
   7  -3  10   18.00   15.75
   7  -3  10   30.10   11.31
  -7   3 -11   67.34   17.18
   7   3  11  126.95   20.68
   7   3  11  119.99   17.99
   7   3  11  101.56    9.27
   7  -3  11   88.68   22.23
   7  -3  11  113.77   17.19
   7   3  12   32.05    5.84
  -7  -3 -12   40.73   11.91
   7  -3  12    9.75   20.80
  -7   4  12   -1.97   14.33
  -7   4  11    1.22    5.11
  -7   4  11    1.56   13.05
  -7  -4  11   18.79    8.82
  -7  -4  11  -12.33   21.39
  -7   4  10   25.65   10.72
   7   4 -10   11.31   10.54
  -7   4  10   10.69    5.03
  -7  -4  10   36.04   21.83
  -7  -4  10   -6.73    8.46
   7   4  -9  150.30   16.78
  -7   4   9  106.46   10.00
  -7   4   9  109.83   15.40
  -7  -4   9  115.56   12.36
  -7  -4   9  114.50   23.71
   7  -4  -9  126.81   10.87
   7   4  -8   -2.41    8.81
  -7   4   8   -3.69    8.23
  -7   4   8   -0.94    3.81
   7  -4  -8    1.40    4.56
  -7  -4   8   -3.53    6.75
  -7  -4   8  -10.98   16.96
   7   4  -7 2218.30  114.72
  -7   4   7 2199.79  114.75
  -7   4   7 2127.76  107.91
  -7  -4   7 2297.47  120.22
   7  -4  -7 2295.04  107.76
  -7  -4   7 2093.54  109.10
   7   4  -6 1771.38   94.39
  -7   4   6 1734.22   93.88
  -7   4   6 1751.08   88.44
   7  -4  -6 1750.45   94.64
   7  -4  -6 1811.68   87.66
  -7  -4   6 1917.03   99.32
  -7   4   5 1467.77   77.66
  -7   4   5 1439.73   73.42
   7   4  -5 1518.98   78.81
   7  -4  -5 1453.28   78.73
  -7  -4   5 1439.60   74.49
   7  -4  -5 1493.51   72.23
  -7  -4   5 1567.30   82.76
  -7   4   4   50.80    7.80
  -7   4   4   47.71    5.97
  -7   4   4   41.45    4.69
  -7   4   4   58.66    7.12
   7   4  -4   55.72    8.87
   7  -4  -4   46.20    3.98
  -7  -4   4   57.29    6.58
  -7  -4   4   38.46   10.43
  -7   4   3  640.88   34.26
  -7   4   3  680.85   33.87
  -7   4   3  702.58   35.64
   7   4  -3  682.31   38.12
  -7   4   3  614.70   36.06
   7   4  -3  627.33   40.68
  -7  -4   3  747.83   41.14
  -7  -4   3  685.12   38.28
   7  -4  -3  631.82   32.58
  -7  -4   3  679.06   35.36
   7   4  -2  484.41   29.18
  -7   4   2  501.92   25.74
  -7   4   2  466.05   26.15
  -7   4   2  513.55   27.92
   7   4  -2  482.27   32.36
   7   4  -2  477.42   26.81
  -7   4   2  438.61   27.57
   7  -4  -2  509.49   25.00
  -7  -4   2  533.67   32.24
  -7  -4   2  489.64   27.20
  -7  -4   2  501.84   29.82
  -7   4   1   47.91    4.65
  -7   4   1   43.62    4.03
  -7   4   1   50.47    6.96
   7   4  -1   60.56    6.82
   7   4  -1   56.25   11.71
   7   4  -1   36.03    9.66
  -7   4   1   43.20    5.00
  -7   4   1   49.94    6.38
  -7  -4   1   35.65    7.12
  -7  -4   1   36.73    7.35
  -7  -4   1   44.64    5.39
   7  -4  -1   61.35    4.31
  -7   4   0  552.31   27.58
   7   4   0  557.28   30.15
  -7   4   0  534.95   29.94
  -7   4   0  528.72   28.12
   7   4   0  570.68   37.80
  -7   4   0  567.56   27.63
   7   4   0  544.22   33.20
  -7   4   0  586.89   31.50
   7  -4   0  541.03   29.09
   7  -4   0  548.08   27.93
  -7  -4   0  553.60   32.61
  -7  -4   0  556.97   29.53
   7  -4   0  540.33   29.07
  -7  -4   0  527.28   31.20
   7   4   1  214.49   13.04
  -7   4  -1  200.55   10.82
   7   4   1  227.23   17.02
  -7   4  -1  217.10   15.50
   7   4   1  196.84   20.50
  -7   4  -1  223.44   15.23
  -7   4  -1  203.05   11.85
  -7   4  -1  205.05   10.91
   7   4   1  187.42   12.88
  -7  -4  -1  207.53   14.48
   7  -4   1  220.57   14.14
  -7  -4  -1  219.90   19.58
   7  -4   1  203.52   13.30
   7  -4   1  221.99   12.11
  -7  -4  -1  215.63   13.09
   7   4   2  613.78   38.15
  -7   4  -2  531.57   24.63
   7   4   2  656.92   27.26
  -7   4  -2  598.76   31.43
   7   4   2  601.53   31.87
  -7   4  -2  624.12   26.62
   7   4   2  583.86   27.76
   7   4   2  620.24   35.46
  -7   4  -2  615.41   31.59
  -7  -4  -2  605.88   29.21
   7  -4   2  652.66   27.11
   7  -4   2  630.40   30.39
   7  -4   2  614.22   29.65
  -7  -4  -2  564.05   27.67
   7   4   3 1441.36   79.43
  -7   4  -3 1460.27   76.91
   7   4   3 1495.42   71.75
  -7   4  -3 1462.31   71.83
   7   4   3 1362.28   75.90
   7   4   3 1576.70   82.31
  -7   4  -3 1543.83   77.35
  -7  -4  -3 1403.39   72.77
   7  -4   3 1450.46   75.75
   7  -4   3 1426.14   75.83
   7  -4   3 1508.96   72.32
  -7  -4  -3 1367.80   73.31
   7   4   4  271.18   23.74
   7   4   4  278.37   22.91
  -7   4  -4  250.92   20.43
   7   4   4  294.36   15.99
   7  -4   4  301.09   20.76
   7  -4   4  275.71   21.17
  -7  -4  -4  252.08   17.17
   7   4   5 1039.19   54.66
   7   4   5  992.69   62.69
   7   4   5  966.43   62.21
  -7  -4  -5  952.70   55.67
   7  -4   5 1056.16   62.46
   7  -4   5  952.38   59.85
   7   4   6 1281.69   63.38
   7   4   6 1268.92   72.58
   7   4   6 1215.81   72.38
   7  -4   6 1281.40   70.20
   7  -4   6 1290.34   72.56
   7   4   7  329.38   28.47
   7   4   7  362.79   29.69
   7   4   7  371.38   20.53
   7  -4   7  385.98   30.67
   7  -4   7  390.79   27.61
   7   4   8   79.84   14.87
   7   4   8   96.96    7.68
   7   4   8   64.78   14.92
   7  -4   8   88.70   13.48
   7  -4   8   79.92   17.98
  -7   4  -9  279.35   26.36
   7   4   9  300.13   28.77
   7   4   9  306.00   27.14
   7  -4   9  298.17   30.47
   7  -4   9  271.12   24.40
   7   4  10   56.87   15.10
  -7   4 -10   39.44   13.77
   7   4  10   38.43    6.48
   7   4  10   23.84   14.44
   7  -4  10   48.51   19.12
   7   4  11    1.10    4.43
   7   4  11   -1.69   11.77
   7  -4  11    4.47   19.92
   7   4  12  200.38   14.85
  -7  -5  11  134.69   14.68
  -7   5  10  299.65   20.15
   7   5 -10  351.29   28.66
  -7  -5  10  348.06   23.03
  -7  -5  10  324.08   36.12
   7   5  -9   37.41   11.97
  -7   5   9   13.23   10.97
  -7   5   9   26.36    5.86
  -7  -5   9   46.94    8.82
  -7  -5   9   12.50   16.56
  -7   5   8  134.17   17.45
   7   5  -8  139.15   17.04
  -7   5   8  130.45   10.58
  -7  -5   8  136.72   22.74
  -7  -5   8  114.24   12.17
  -7   5   7   77.71    7.08
  -7   5   7   80.68   12.67
   7   5  -7   69.25   12.77
  -7  -5   7   85.64    9.28
  -7  -5   7   94.69   18.45
  -7   5   6    6.18    3.68
   7   5  -6    4.36    8.05
  -7   5   6    1.04    6.67
  -7  -5   6   -6.20   13.19
  -7  -5   6    6.10    5.33
  -7   5   5  333.39   23.50
  -7   5   5  322.29   19.28
   7   5  -5  393.91   25.77
  -7  -5   5  346.11   28.48
   7   5  -4   15.69    7.32
  -7   5   4   21.99    6.48
  -7   5   4   17.95    6.25
  -7   5   4   27.86    3.96
  -7  -5   4   16.28   10.39
  -7   5   3   21.49    6.58
   7   5  -3   14.02    6.29
  -7   5   3   21.84    6.43
   7   5  -3   19.71   10.37
  -7   5   3   15.49    3.07
  -7  -5   3   16.14    4.46
  -7  -5   3   29.26    9.55
   7  -5  -3   14.05    1.83
  -7   5   2   74.95    6.03
   7   5  -2   74.22   13.89
   7   5  -2   85.01    9.31
  -7   5   2   80.09    6.41
  -7   5   2   57.17    8.67
  -7   5   2   73.59    9.13
   7  -5  -2   76.17    4.95
  -7  -5   2   79.57   11.71
  -7  -5   2   70.99    7.27
  -7   5   1  158.47   13.02
  -7   5   1  122.90    8.38
   7   5  -1  164.90   18.38
   7   5  -1  124.21   11.10
  -7   5   1  134.27    8.58
  -7   5   1  113.50    8.43
  -7   5   1  130.35   12.07
  -7  -5   1  125.91   13.61
   7  -5  -1  145.60    8.08
  -7  -5   1  137.36   10.24
  -7  -5   1  115.29   11.68
  -7   5   0  458.71   23.67
   7   5   0  481.97   26.34
   7   5   0  457.69   34.22
  -7   5   0  462.30   28.66
  -7   5   0  473.67   26.52
  -7   5   0  457.37   23.65
  -7   5   0  445.51   23.79
  -7  -5   0  454.17   27.52
   7  -5   0  466.14   23.79
  -7  -5   0  466.82   25.78
   7  -5   0  440.30   25.70
  -7  -5   0  457.51   29.31
  -7   5  -1  961.78   50.73
   7   5   1  908.24   48.22
  -7   5  -1  887.23   46.37
  -7   5  -1  996.55   52.35
  -7   5  -1  953.71   46.97
   7   5   1 1041.75   59.86
   7  -5   1 1014.55   47.38
   7  -5   1  918.69   49.39
  -7  -5  -1  954.83   50.45
  -7  -5  -1  938.07   52.48
   7  -5   1  974.57   49.07
  -7  -5  -1  976.10   48.92
  -7   5  -2  152.53   13.42
   7   5   2  118.19   18.44
  -7   5  -2  132.30   14.34
  -7   5  -2  133.87    8.64
   7   5   2  137.95   16.71
   7   5   2  127.90    9.02
  -7  -5  -2  142.96   10.26
   7  -5   2  149.03   12.36
  -7  -5  -2  149.57   11.86
   7  -5   2  131.95   11.32
  -7   5  -3    6.79    7.79
   7   5   3    1.51   10.08
   7   5   3    2.88    2.28
  -7   5  -3   14.75    8.90
   7   5   3   12.92    8.64
   7  -5   3    2.66    5.37
   7  -5   3    9.52    6.69
  -7  -5  -3    4.58    3.37
  -7  -5  -3    2.45    5.09
   7   5   4   15.89   10.08
   7   5   4   20.29    3.24
   7   5   4    1.31    7.82
  -7  -5  -4   18.50    5.49
   7  -5   4   17.38    7.03
   7  -5   4   26.72    9.20
   7   5   5  489.81   35.40
   7   5   5  505.22   25.90
   7   5   5  439.43   34.47
   7  -5   5  522.17   33.79
  -7  -5  -5  468.66   27.64
   7  -5   5  462.82   31.26
   7   5   6  171.43   18.73
   7   5   6  128.37   17.51
   7  -5   6  158.94   19.52
   7  -5   6  164.10   15.98
   7   5   7    5.89   10.53
   7   5   7   13.82   10.69
  -7   5  -7   17.47   10.58
   7  -5   7   12.26    8.77
   7  -5   7    8.88   13.88
  -7   5  -8  104.54   16.63
   7   5   8   95.09   15.77
   7   5   8  115.11   17.64
   7  -5   8  120.50   20.42
   7  -5   8   83.22   13.88
   7   5   9   20.29   11.77
  -7   5  -9   17.36   12.27
   7   5   9   26.19   13.76
   7  -5   9   26.53   10.41
   7  -5   9   33.87   17.56
  -7   5 -10    1.69   11.31
   7   5  10    4.17   14.88
   7   5  10   -1.76    5.00
   7   5  10    8.24   12.27
   7  -5  10   -4.17   18.30
   7  -5  10   -2.86   10.13
   7   5  11   17.99    5.77
   7  -5  11   -9.14   22.88
  -7  -6  10  104.53   12.28
   7   6  -9  541.15   37.76
  -7   6   9  476.84   29.04
  -7  -6   9  499.37   43.02
  -7  -6   9  529.88   31.21
   7   6  -8  373.68   29.08
  -7   6   8  330.11   28.96
  -7   6   8  344.99   21.88
  -7  -6   8  400.03   35.59
  -7  -6   8  366.46   23.77
   7   6  -7   41.86   11.62
  -7   6   7   39.45   10.48
  -7   6   7   44.64    6.14
  -7  -6   7   36.95    7.77
  -7  -6   7   60.19   16.94
  -7   6   6  148.32   15.86
   7   6  -6  126.52   15.76
  -7   6   6  129.17   10.30
  -7  -6   6  144.29   12.30
  -7  -6   6  125.69   19.33
   7   6  -5  631.18   37.38
  -7   6   5  532.09   30.78
  -7   6   5  526.72   35.31
  -7  -6   5  623.69   41.60
  -7  -6   5  605.89   32.85
  -7   6   4  269.16   13.58
  -7   6   4  262.07   18.21
   7   6  -4  276.66   19.31
  -7  -6   4  303.58   23.59
  -7   6   3 1133.49   57.73
  -7   6   3 1031.89   61.63
   7   6  -3 1183.84   62.42
  -7  -6   3 1167.52   66.77
  -7   6   2    2.11    3.06
  -7   6   2   -1.64    6.46
   7   6  -2   -2.12    6.26
   7   6  -2   -1.68   10.89
  -7   6   2   -3.07    2.87
  -7  -6   2    1.99    3.71
  -7  -6   2    6.84    7.85
  -7   6   1  775.82   47.89
   7   6  -1  993.90   56.99
   7   6  -1  916.24   46.45
  -7   6   1  814.56   42.86
  -7  -6   1  854.91   44.86
  -7  -6   1  883.88   50.06
   7   6   0   18.33   12.33
   7   6   0    8.98    4.06
  -7  -6   0   18.35    6.85
  -7  -6   0   16.63    4.31
   7  -6   0   13.64    4.94
  -7  -6   0   20.34    7.80
   7   6   1   36.02    5.20
   7   6   1   57.96   13.70
   7  -6   1   46.23    6.91
  -7  -6  -1   32.95    5.09
  -7  -6  -1   39.00    7.59
   7   6   2  331.15   18.27
   7   6   2  327.00   28.62
   7   6   2  342.83   30.46
  -7  -6  -2  299.98   19.49
  -7  -6  -2  327.63   21.10
   7  -6   2  341.38   22.24
   7   6   3 3424.77  177.31
   7   6   3 3424.61  175.47
   7   6   3 3344.74  163.39
  -7  -6  -3 3272.18  165.54
   7  -6   3 3549.86  169.40
  -7  -6  -3 3388.60  166.35
   7  -6   3 3605.95  167.80
   7   6   4 1191.41   73.02
   7   6   4 1292.56   72.86
   7  -6   4 1227.71   65.66
  -7  -6  -4 1181.43   63.44
   7  -6   4 1281.14   67.93
   7   6   5  592.73   41.63
   7   6   5  593.69   42.31
  -7   6  -5  578.91   38.66
   7  -6   5  597.08   38.83
   7  -6   5  606.02   36.56
  -7   6  -6   10.32    9.79
   7   6   6   30.44   12.06
   7   6   6   14.19   10.67
   7  -6   6    1.30   10.70
   7  -6   6   11.94    7.78
   7   6   7  176.97   22.00
   7   6   7  225.87   24.08
  -7   6  -7  235.12   22.51
   7  -6   7  209.20   19.36
   7  -6   7  222.88   23.21
   7   6   8  150.95   22.14
   7   6   8  183.75   21.88
  -7   6  -8  162.42   20.33
   7  -6   8  177.56   18.58
   7  -6   8  183.97   23.67
  -7   6  -9  189.78   22.72
   7   6   9  239.72   25.00
   7   6   9  180.13   25.22
   7  -6   9  229.03   21.66
   7  -6   9  226.69   27.12
   7   6  10   37.12   14.75
   7  -6  10   43.70   20.35
  -7   7   9  116.08   11.13
  -7  -7   9  119.32   12.96
  -7   7   8   26.15    6.06
   7   7  -8   34.84   12.29
  -7  -7   8   31.59    7.67
  -7  -7   8   56.33   19.19
   7   7  -7   69.52   13.87
  -7   7   7   49.12    6.83
  -7  -7   7   44.72   16.35
  -7  -7   7   61.39    8.86
   7   7  -6    2.44    9.94
  -7   7   6    1.47    3.80
  -7  -7   6    8.47    5.62
  -7  -7   6   -3.61   14.19
  -7   7   5   91.31    8.24
   7   7  -5   90.90   13.88
  -7  -7   5   95.86   17.64
  -7  -7   5   82.17    9.64
  -7   7   4  271.89   16.94
  -7   7   4  217.38   20.78
   7   7  -4  282.95   29.77
   7   7  -4  311.34   22.53
  -7  -7   4  262.33   18.30
  -7  -7   4  275.29   26.47
  -7   7   3    5.42    3.26
   7   7  -3   -5.87   12.82
   7   7  -3    5.24    6.81
  -7   7   3   -3.03    8.04
  -7  -7   3    2.80    9.66
  -7   7   2   89.02   12.47
   7   7  -2   91.40   10.65
   7   7  -2   99.45   18.53
  -7   7   2   79.23    7.18
  -7  -7   2  101.39   14.10
   7   7  -1   27.27    6.58
   7   7  -1   28.40   13.33
  -7   7   1   12.90    8.65
  -7  -7   1   24.02    5.60
  -7  -7   1   21.08    9.20
   7   7   0   -1.46    4.52
   7   7   0   -7.53   11.81
   7  -7   0   -1.34    5.39
  -7  -7   0   -1.12    7.17
  -7  -7   0    2.10    4.42
   7   7   1  286.81   28.33
   7   7   1  284.06   28.68
  -7  -7  -1  298.51   19.83
  -7  -7  -1  266.95   17.75
   7  -7   1  261.75   19.22
   7   7   2  593.10   43.62
   7   7   2  524.56   41.05
  -7  -7  -2  528.27   31.87
   7  -7   2  535.03   33.15
  -7  -7  -2  545.75   31.01
  -7   7  -3   38.03   10.38
   7   7   3   33.24   12.66
   7   7   3   23.06   12.90
   7  -7   3   31.89    8.99
  -7  -7  -3   19.33    5.48
  -7   7  -4  453.40   30.81
   7   7   4  372.14   34.76
   7   7   4  357.64   33.52
   7  -7   4  474.35   30.88
   7   7   5  522.28   41.35
  -7   7  -5  581.70   37.99
   7   7   5  535.30   41.30
   7  -7   5  586.31   38.38
   7   7   6   10.00   12.45
  -7   7  -6   19.88   11.72
   7   7   6   15.96   11.65
   7  -7   6   21.58   11.79
   7  -7   6   19.71    8.69
   7   7   7   60.60   16.29
  -7   7  -7   64.81   14.51
   7   7   7   61.68   15.36
   7  -7   7   76.23   16.04
   7  -7   7   86.93   12.81
  -7   7  -8   43.43   13.31
   7   7   8   37.41   15.34
   7   7   8   34.52   14.42
   7  -7   8   46.33   15.15
   7  -7   8   24.84   10.51
   7   7   9   12.13   14.21
   7  -7   9   11.42   16.71
   7   8  -8   -3.03   12.49
  -7  -8   8   -5.37    6.81
  -7   8   7   -1.70    4.33
   7   8  -7    6.97   10.96
  -7  -8   7    4.15   15.84
  -7  -8   7   -0.74    6.48
  -7   8   6   10.77    4.65
   7   8  -6   13.86   10.47
  -7  -8   6   11.41    6.70
  -7  -8   6   19.43   15.28
  -7   8   5    1.52    3.71
   7   8  -5   -1.15    9.50
  -7  -8   5    4.11    5.49
  -7  -8   5    1.83   11.64
   7   8  -4   27.36   15.78
   7   8  -4   44.39   10.82
  -7   8   4   28.29    5.34
  -7  -8   4   26.77   13.15
  -7  -8   4   42.66    7.70
   7   8  -3  224.10   19.60
   7   8  -3  265.49   29.52
  -7   8   3  230.90   15.75
  -7  -8   3  287.11   18.44
  -7  -8   3  231.01   24.08
  -7  -8   2  290.19   25.55
  -7  -8   2  278.37   19.23
   7   8  -1  313.98   31.42
  -7  -8   1  265.13   24.00
   7   8   0  990.65   63.54
  -7  -8   0  969.19   56.09
  -7  -8   0  899.19   49.38
   7   8   1   66.43   18.30
  -7  -8  -1   51.45    7.43
   7  -8   1   53.14    9.46
   7   8   2 1059.27   69.08
   7  -8   2 1032.76   57.25
  -7  -8  -2 1011.07   54.41
   7   8   3  205.64   27.81
   7   8   3  206.49   25.07
   7   8   4   28.26   15.70
   7   8   4   29.40   14.44
   7  -8   4   34.80   10.23
   7   8   5   13.66   13.57
   7   8   5    1.92   13.07
   7  -8   5   -2.62   10.15
   7   8   6    1.97   13.06
   7   8   6   -5.45   14.49
   7  -8   6  -11.48   12.07
   7   8   7   14.24   14.29
   7  -8   7    4.79   11.99
  -7   8  -8   38.34   14.43
   7  -8   8   59.25   17.59
  -7   9   6  268.42   18.49
  -7  -9   6  285.46   20.71
  -7  -9   5    0.73    6.14
   7   9  -4  613.75   48.49
  -7  -9   4  497.88   40.53
  -7  -9   4  536.46   32.31
   7   9  -3   78.62   20.06
  -7  -9   3   74.76    9.90
  -7  -9   3   85.24   16.23
   7   9  -2   19.28   15.80
  -7  -9   2   23.21   11.63
  -7  -9   2    7.41    5.93
   7   9  -1   98.22   21.96
  -7  -9   1   87.08   15.65
  -7  -9   1   78.78    9.75
   7   9   0   92.03   21.38
  -7  -9   0   51.93   13.13
   7   9   1  265.11   31.90
   7  -9   1  276.86   21.76
  -7  -9  -2  167.67   14.13
   7  -9   2  145.40   15.87
   7   9   3   72.90   20.69
   7  -9   3   74.71   12.62
   7   9   4   74.86   20.67
   7  -9   4   44.23   12.34
   7   9   5    6.22   16.56
   7  -9   5   26.15   11.16
   7   9   6   91.73   20.45
   7  -9   6  132.47   18.66
   7  10   0  144.37   27.61
   7  10   1   13.18   18.16
   7  10   2  163.19   29.32
   8   0 -13    5.51    9.84
   8   0 -12 2528.80  134.77
  -8   0  12 2712.57  145.76
   8   0 -11    4.78    9.05
  -8   0  11   10.42   17.74
   8   0 -10   31.91    9.88
  -8   0  10   20.45    6.26
  -8   0  10   33.77   16.49
  -8   0   9   -1.59    4.32
   8   0  -9    3.30    7.58
  -8   0   9    6.69   12.85
   8   0  -9    1.01    7.75
  -8   0   8    9.66    4.25
   8   0  -8    7.35    7.44
   8   0  -8   21.77    7.32
   8   0  -7    4.00    8.83
  -8   0   7    1.28   10.45
   8   0  -7    2.94    5.67
   8   0  -7   -2.47    6.18
  -8   0   7   -0.44    3.15
  -8   0   6  898.28   47.27
   8   0  -6  940.28   50.48
   8   0  -6  923.89   51.86
  -8   0   6  944.02   54.30
   8   0  -6  917.37   48.10
   8   0  -5    1.51    3.71
   8   0  -5   10.56    6.42
   8   0  -5   -1.76    2.86
  -8   0   5    2.48    2.86
  -8   0   5    4.72    5.95
   8   0  -5   -1.31    4.76
  -8   0   5   -0.90    7.56
   8   0  -4   12.66    5.88
   8   0  -4    4.52    4.39
  -8   0   4    7.63    2.88
   8   0  -4   10.27    2.96
   8   0  -4   11.49    5.13
  -8   0   4   12.01    6.99
  -8   0   4   15.44    5.91
   8   0  -3    2.47    5.05
   8   0  -3   -1.39    3.11
  -8   0   3   -3.75    5.57
  -8   0   3   -3.16    6.28
  -8   0   3   -0.28    2.26
   8   0  -3    2.40    3.72
   8   0  -3    0.67    2.08
  -8   0   2  266.69   15.85
   8   0  -2  282.54   18.93
  -8   0   2  275.29   15.00
   8   0  -2  231.31   15.55
  -8   0   2  255.53   16.91
   8   0  -2  259.48   14.39
  -8   0   1   -5.72    4.59
  -8   0   1   -0.42    2.73
   8   0  -1    3.98    5.44
   8   0  -1    2.22    3.16
  -8   0   1    0.65    1.76
   8   0  -1   -0.17    1.91
  -8   0   1    2.83    5.63
   8   0   0 8797.64  434.57
   8   0   0 9237.50  429.83
   8   0   0 8817.74  430.17
  -8   0   0 9135.43  430.13
   8   0   0 9033.79  430.94
  -8   0   0 9067.84  434.80
  -8   0   0 8656.67  431.72
   8   0   1    0.27    1.79
   8   0   1    3.36    4.54
  -8   0  -1   -0.30    1.62
  -8   0  -1    4.16    3.23
   8   0   1   -1.38    2.50
   8   0   1   -1.92    2.03
  -8   0  -1   -0.79    7.37
  -8   0  -2 2501.27  121.39
   8   0   2 2329.52  113.67
   8   0   2 2326.74  119.50
   8   0   2 2466.70  114.77
   8   0   2 2202.22  116.01
  -8   0  -2 2291.64  116.49
  -8   0  -2 2362.22  115.17
  -8   0  -2 2396.78  113.66
  -8   0  -3    1.99    2.61
   8   0   3    2.20    4.53
   8   0   3    0.92    2.22
   8   0   3   -0.92    1.89
   8   0   3    0.83    5.83
  -8   0  -3   -3.62    5.00
  -8   0  -3   -1.87    7.91
   8   0   4  523.04   26.83
  -8   0  -4  563.97   31.76
  -8   0  -4  571.30   35.24
   8   0   4  548.27   28.05
   8   0   4  507.13   31.61
  -8   0  -5    9.20    6.76
   8   0   5    5.45    6.29
   8   0   5    1.32    1.90
   8   0   5   -0.62    2.33
   8   0   6  186.51   15.96
   8   0   6  186.74   11.99
   8   0   6  142.46   17.19
  -8   0  -6  198.54   17.68
   8   0   6  185.75   10.74
   8   0   6  188.94   10.76
   8   0   7   -1.24    7.48
   8   0   7   -1.12    2.58
   8   0   7    0.95    6.96
   8   0   7    0.39    3.23
   8   0   7   -0.21    2.27
   8   0   8  814.05   52.16
   8   0   8  852.65   42.54
   8   0   8  868.99   42.82
   8   0   9    0.55    2.46
   8   0   9   -1.54   10.99
   8   0   9   16.13   10.56
   8   0  10  143.04   18.74
   8   0  10  111.64   19.36
   8   0  11   10.19   12.24
   8   0  11  -10.63   15.58
   8   0  12 1022.41   70.21
   8  -1 -13   -7.62    9.39
   8   1 -12    4.13    9.92
  -8   1  12    6.71   17.05
  -8  -1  12   21.26   19.36
  -8  -1  12    5.71    6.85
   8  -1 -12    7.10    9.17
  -8   1  11    4.96    5.45
   8   1 -11    8.97    9.78
  -8   1  11   10.12   16.69
   8  -1 -11    7.68    8.30
  -8  -1  11   17.23   17.88
  -8   1  10    3.62   13.71
  -8   1  10    7.94    5.00
   8   1 -10   11.88    9.61
  -8  -1  10   11.69   17.09
   8  -1 -10   15.10    8.95
   8   1  -9   74.61   12.52
  -8   1   9   82.32    8.50
  -8   1   9   57.91   16.16
   8  -1  -9   91.34   11.82
  -8  -1   9   92.55   19.94
  -8  -1   9   86.70    9.08
  -8   1   8  831.54   53.94
   8   1  -8  848.79   50.42
  -8   1   8  862.77   45.71
   8  -1  -8  889.71   47.22
   8  -1  -8  831.16   48.56
  -8  -1   8  895.14   55.93
  -8  -1   8  876.15   46.25
   8   1  -7  224.02   16.60
  -8   1   7  212.62   14.15
   8   1  -7  221.52   18.34
  -8   1   7  214.88   20.57
   8  -1  -7  228.20   15.54
  -8  -1   7  218.97   22.56
  -8  -1   7  209.54   14.66
   8  -1  -7  230.64   17.17
   8  -1  -7  235.97   18.93
  -8   1   6  209.48   18.97
   8   1  -6  166.16   15.01
  -8   1   6  208.11   13.42
   8   1  -6  205.82   14.82
  -8   1   6  213.58   16.49
   8   1  -6  202.70   16.61
   8  -1  -6  234.05   17.56
  -8  -1   6  229.69   21.31
   8  -1  -6  180.27   15.22
   8  -1  -6  231.70   14.21
  -8  -1   6  201.45   13.80
   8   1  -5  946.21   52.17
  -8   1   5 1022.34   56.15
  -8   1   5  967.23   53.97
   8   1  -5  852.30   54.15
  -8   1   5 1054.25   51.65
   8  -1  -5  972.22   51.11
  -8  -1   5  997.04   55.20
   8  -1  -5 1020.94   53.69
  -8  -1   5 1080.21   58.32
  -8  -1   5 1070.52   52.26
   8  -1  -5 1080.29   54.72
   8  -1  -5 1006.06   51.16
   8   1  -4  775.99   41.67
   8   1  -4  854.19   46.28
  -8   1   4  764.64   44.10
  -8   1   4  810.04   45.30
  -8   1   4  809.31   42.01
   8  -1  -4  902.04   43.65
   8  -1  -4  843.04   41.79
   8  -1  -4  782.97   41.18
   8  -1  -4  845.28   43.93
  -8  -1   4  874.92   42.65
  -8  -1   4  794.05   45.13
  -8  -1   4  888.85   47.54
   8  -1  -4  830.42   43.76
   8   1  -3   87.96   10.22
  -8   1   3   73.00    8.79
   8   1  -3   90.40    6.58
  -8   1   3   83.52    6.59
   8   1  -3   98.46   11.32
  -8   1   3  104.22    9.23
   8  -1  -3   99.33    8.65
   8  -1  -3   83.04    6.35
   8  -1  -3   89.03    7.62
  -8  -1   3   79.03   10.11
  -8  -1   3   70.29    9.02
   8  -1  -3   88.19    7.66
  -8  -1   3   95.68    7.38
  -8   1   2  530.73   31.36
   8   1  -2  591.67   31.91
   8   1  -2  566.99   29.52
  -8   1   2  618.56   29.89
   8   1  -2  645.30   35.58
   8   1  -2  585.53   32.44
  -8   1   2  604.73   29.59
  -8  -1   2  608.00   30.29
  -8  -1   2  601.24   31.85
   8  -1  -2  577.87   31.52
   8  -1  -2  541.47   29.06
   8  -1  -2  497.21   28.97
   8  -1  -2  600.71   30.64
  -8  -1   2  552.21   32.19
   8   1  -1  614.04   36.70
  -8   1   1  562.25   32.67
   8   1  -1  606.25   31.95
  -8   1   1  546.68   31.65
  -8   1   1  624.12   30.14
   8   1  -1  581.06   32.53
   8   1  -1  591.19   30.31
   8  -1  -1  617.13   30.96
  -8  -1   1  613.78   31.49
  -8  -1   1  636.88   35.33
   8  -1  -1  557.98   32.21
   8  -1  -1  573.22   29.70
  -8  -1   1  606.36   30.73
  -8  -1   1  535.09   32.38
   8   1   0  672.36   35.53
  -8   1   0  665.61   35.16
  -8   1   0  709.66   33.60
  -8   1   0  655.46   37.84
   8   1   0  697.30   40.67
   8   1   0  700.87   36.87
   8   1   0  684.22   35.19
   8   1   0  680.23   33.96
  -8  -1   0  714.53   39.79
  -8  -1   0  608.61   35.78
  -8  -1   0  694.15   34.26
   8  -1   0  639.50   33.20
   8  -1   0  670.34   36.97
   8   1   1  137.96    8.89
   8   1   1  142.95    9.77
  -8   1  -1  139.20    9.30
  -8   1  -1  154.65   13.66
   8   1   1  152.83   14.37
  -8   1  -1  147.32    7.60
   8   1   1  148.24    8.68
   8   1   1  144.90   10.88
   8  -1   1  141.32    7.41
   8  -1   1  123.99    7.30
  -8  -1  -1  140.00    8.49
   8  -1   1  132.52   11.53
   8  -1   1  122.24    7.94
  -8  -1  -1  151.45   14.62
  -8  -1  -1  131.47    9.87
   8   1   2  499.87   26.20
   8   1   2  489.06   27.68
   8   1   2  507.18   25.20
  -8   1  -2  493.98   30.28
   8   1   2  505.11   24.64
  -8   1  -2  466.63   23.41
  -8   1  -2  508.58   25.81
  -8   1  -2  504.56   25.44
   8  -1   2  459.02   23.37
   8  -1   2  494.97   29.17
  -8  -1  -2  495.24   24.58
  -8  -1  -2  502.13   32.38
  -8   1  -3  308.12   18.59
  -8   1  -3  312.39   16.92
  -8   1  -3  360.14   23.19
   8   1   3  295.95   16.16
   8   1   3  312.86   16.77
   8   1   3  307.33   20.04
  -8  -1  -3  318.02   21.02
   8  -1   3  307.35   21.34
  -8  -1  -3  303.39   16.22
   8  -1   3  287.04   19.11
   8  -1   3  295.20   14.92
  -8  -1  -3  320.74   24.81
   8  -1   3  303.64   16.88
  -8   1  -4  296.45   21.76
   8   1   4  300.28   15.53
   8   1   4  258.56   18.95
  -8   1  -4  251.77   17.62
   8   1   4  254.15   14.36
   8  -1   4  273.73   20.43
  -8  -1  -4  256.73   15.35
   8  -1   4  240.88   18.45
   8  -1   4  264.78   15.07
   8  -1   4  249.36   13.15
  -8  -1  -4  261.92   23.02
  -8  -1  -4  263.28   19.90
   8   1   5    1.18    2.14
  -8   1  -5    6.41    6.77
   8   1   5   -0.22    2.35
   8   1   5    3.20    7.00
   8   1   5    2.75    6.07
   8  -1   5    2.61    6.62
  -8  -1  -5    6.16    6.81
   8  -1   5    7.01    6.76
   8  -1   5    1.65    2.34
   8  -1   5    1.38    1.31
   8   1   6  503.75   18.62
   8   1   6  475.36   26.90
   8   1   6  521.68   28.13
  -8   1  -6  516.61   25.51
   8   1   6  503.35   17.47
   8  -1   6  480.45   26.99
   8  -1   6  485.39   18.70
   8  -1   6  511.18   15.86
   8   1   7 2300.28  129.23
   8   1   7 2455.50  121.95
   8   1   7 2623.89  121.35
   8   1   7 2474.22  130.43
   8   1   7 2509.81  121.17
   8  -1   7 2558.99  120.20
   8  -1   7 2460.58  122.32
   8  -1   7 2416.71  119.98
   8  -1   7 2619.20  131.23
   8   1   8 1881.92  100.27
   8   1   8 1981.17   90.58
   8   1   8 1826.37   91.22
   8   1   8 1857.77   90.21
   8   1   8 1673.48   98.46
   8  -1   8 1795.03   89.08
   8  -1   8 1704.78   99.42
   8  -1   8 1790.82  100.96
   8   1   9    4.41    9.33
   8   1   9    0.32    2.86
   8   1   9   -3.81    6.58
   8  -1   9    1.16    2.29
   8  -1   9  -12.01   12.88
   8  -1   9    8.86    9.87
   8   1  10  122.82   17.64
   8   1  10  150.12   10.29
   8   1  10  117.23   18.11
   8  -1  10  135.41   21.35
   8  -1  10  142.18   18.85
   8   1  11   -1.88   13.64
   8   1  11    8.56   13.06
   8  -1  11   -2.15   16.05
   8  -1  11   -9.85   12.02
   8  -1  12    4.75   17.26
  -8  -1 -12   -3.21   11.66
   8   2 -12  209.21   22.49
  -8   2  12  222.12   29.08
   8  -2 -12  197.79   18.74
  -8  -2  12  159.77   29.40
  -8  -2  12  195.26   16.51
  -8   2  11  181.01   26.14
  -8   2  11  230.01   16.43
   8   2 -11  202.04   21.68
  -8  -2  11  208.62   16.83
  -8  -2  11  272.70   32.64
   8  -2 -11  207.48   18.52
  -8   2  10   98.02    9.84
   8   2 -10  100.54   14.96
  -8   2  10  118.61   19.52
  -8  -2  10   74.61   21.33
   8  -2 -10  102.57   12.69
  -8   2   9   51.01    7.15
  -8   2   9   67.18   14.98
   8   2  -9   73.03   12.58
   8  -2  -9   76.78   10.22
  -8  -2   9   50.77   17.80
  -8   2   8   44.56    6.18
  -8   2   8   51.08   12.89
   8   2  -8   58.48   11.02
  -8  -2   8   42.03   16.29
   8  -2  -8   50.39    8.53
  -8  -2   8   60.31    7.51
  -8   2   7  306.21   25.15
  -8   2   7  303.44   19.01
  -8   2   7  324.05   22.36
  -8  -2   7  325.35   20.09
   8  -2  -7  323.25   21.33
   8  -2  -7  337.78   19.16
   8  -2  -7  331.75   23.97
  -8  -2   7  341.67   29.68
  -8   2   6  252.31   21.72
   8   2  -6  261.67   23.40
   8   2  -6  295.08   19.89
  -8   2   6  307.93   21.22
  -8   2   6  299.13   17.98
  -8  -2   6  306.53   26.49
   8  -2  -6  317.78   19.94
  -8  -2   6  319.12   19.04
   8  -2  -6  311.72   17.26
   8  -2  -6  328.98   22.16
  -8   2   5   86.96    9.71
   8   2  -5  110.33   13.73
  -8   2   5   89.85    7.40
   8   2  -5   93.25    8.75
  -8   2   5   87.30   10.83
   8   2  -5   89.26   10.77
   8  -2  -5   96.00    7.83
   8  -2  -5   92.37   10.43
   8  -2  -5   93.19    8.53
  -8  -2   5   98.72   14.68
   8  -2  -5   92.36    6.78
  -8  -2   5  110.03    8.82
   8  -2  -5   97.35    6.36
   8   2  -4   -1.71    7.76
  -8   2   4    3.51    5.04
  -8   2   4    0.57    2.38
  -8   2   4   -0.56    4.74
   8   2  -4    4.98    5.09
   8  -2  -4    0.27    1.43
  -8  -2   4   -2.12    5.95
   8  -2  -4    2.31    3.21
   8  -2  -4    0.29    2.54
  -8  -2   4   15.08    8.47
   8  -2  -4    1.98    4.66
  -8  -2   4   -0.38    3.60
  -8   2   3    1.78    4.33
   8   2  -3   -2.47    4.92
   8   2  -3   -3.75    7.64
   8   2  -3    6.52    2.84
  -8   2   3   -0.25    1.97
   8   2  -3    5.84    6.82
  -8   2   3    2.48    3.65
   8  -2  -3    1.27    1.00
   8  -2  -3    1.52    1.47
  -8  -2   3   -0.63    5.30
   8  -2  -3    1.28    2.69
  -8  -2   3   -1.44    6.35
  -8  -2   3    2.11    3.74
   8  -2  -3    0.96    2.25
   8  -2  -3    8.09    4.23
   8   2  -2 1188.84   62.10
   8   2  -2 1087.18   58.74
  -8   2   2 1069.54   54.84
  -8   2   2 1125.83   54.66
   8   2  -2 1091.30   55.06
  -8   2   2 1073.08   53.89
   8   2  -2 1080.29   57.78
  -8   2   2 1044.82   56.16
   8  -2  -2 1118.38   55.09
  -8  -2   2 1076.80   57.98
   8  -2  -2 1138.10   54.58
  -8  -2   2 1136.25   58.45
  -8  -2   2 1161.28   55.85
  -8   2   1   69.22    7.16
   8   2  -1   71.85   11.03
   8   2  -1   58.32    8.88
   8   2  -1   56.29    6.55
  -8   2   1   56.01    6.03
   8   2  -1   64.91    5.62
  -8   2   1   71.46    4.71
  -8  -2   1   63.49    5.78
   8  -2  -1   71.64    6.39
   8  -2  -1   63.45    4.64
  -8  -2   1   62.57    7.17
   8  -2  -1   58.99    5.03
   8   2   0  352.33   21.64
   8   2   0  344.24   19.31
  -8   2   0  336.11   21.64
  -8   2   0  321.22   19.48
   8   2   0  340.34   20.18
  -8   2   0  388.21   18.17
   8   2   0  366.77   26.37
  -8  -2   0  363.95   20.94
   8  -2   0  345.08   17.98
   8  -2   0  338.35   18.84
  -8  -2   0  357.78   24.66
  -8  -2   0  368.70   19.53
   8  -2   0  360.26   21.08
  -8   2  -1  890.91   46.04
   8   2   1  995.28   46.66
  -8   2  -1  956.00   49.37
   8   2   1  938.78   48.28
  -8   2  -1  931.48   44.29
   8   2   1  907.37   45.87
   8   2   1  997.23   50.65
  -8  -2  -1  919.50   52.54
   8  -2   1  978.24   46.10
   8  -2   1  842.35   44.55
  -8  -2  -1  938.63   46.08
  -8  -2  -1  834.01   47.31
   8  -2   1  966.85   49.08
  -8   2  -2  275.57   16.90
   8   2   2  310.04   16.70
   8   2   2  303.45   16.76
   8   2   2  302.16   20.42
  -8   2  -2  296.35   16.67
   8   2   2  293.06   18.60
  -8   2  -2  316.48   21.12
   8  -2   2  305.33   16.72
  -8  -2  -2  297.95   16.55
  -8  -2  -2  286.52   17.82
   8  -2   2  313.75   20.56
  -8  -2  -2  273.97   22.94
   8   2   3   70.65    8.11
  -8   2  -3   61.87    7.58
   8   2   3   73.99   11.45
   8   2   3   81.79    5.99
   8   2   3   67.91    9.39
  -8   2  -3   82.44   10.57
   8   2   3   72.70    6.00
  -8   2  -3   78.44    6.20
  -8  -2  -3   80.92    7.17
  -8  -2  -3   80.99    6.06
   8  -2   3   64.95    8.46
  -8  -2  -3   73.81   12.93
   8  -2   3   69.89    9.82
   8   2   4    8.23    6.36
  -8   2  -4    7.12    5.54
   8   2   4   17.65    3.26
  -8   2  -4    0.92    7.63
   8   2   4    8.72    2.93
   8   2   4   11.72    7.08
  -8  -2  -4   12.93    3.84
   8  -2   4   25.69    7.98
  -8  -2  -4   18.41    8.37
   8  -2   4   14.04    6.98
   8   2   5  503.73   26.50
   8   2   5  496.33   33.69
   8   2   5  485.66   32.09
   8   2   5  529.11   26.68
  -8   2  -5  595.84   31.88
   8  -2   5  464.82   32.31
   8  -2   5  521.85   32.78
   8  -2   5  476.26   26.86
  -8  -2  -5  502.67   33.69
   8   2   6  111.12    7.56
   8   2   6  107.49    7.51
  -8   2  -6  124.15   13.38
   8   2   6  119.98   14.21
   8   2   6  123.09   14.72
   8  -2   6   85.25   13.31
   8  -2   6   85.26   12.62
   8  -2   6   82.91    5.05
   8  -2   6  103.40    7.91
   8   2   7    1.07    2.97
   8   2   7    1.29    8.45
   8   2   7    1.31    8.86
   8  -2   7    3.71    9.07
   8  -2   7    3.89    1.66
   8  -2   7    1.32    9.75
   8   2   8   49.72    5.50
   8   2   8   70.53   12.92
   8   2   8   42.93    4.96
   8   2   8   38.75   12.18
   8  -2   8   51.75   14.15
   8   2   9   15.06    4.13
   8   2   9   19.67   11.21
   8   2   9   19.22   12.15
   8  -2   9   31.19   13.54
   8   2  10    1.61   10.42
   8   2  10    4.85   11.14
   8   2  10    3.24    3.56
   8  -2  10   16.74   11.87
   8  -2  10    3.90   14.88
   8   2  11  125.26   10.55
  -8   2 -11   99.61   18.13
   8   2  11  155.87   20.90
   8  -2  11  114.87   18.36
   8  -2  11  147.75   24.22
  -8  -2 -12  238.19   24.07
   8  -2  12  220.46   31.07
  -8   3  12  201.13   27.66
  -8   3  11    9.64   15.58
   8   3 -11    7.26   10.82
  -8   3  11    1.23    4.79
  -8  -3  11    9.30   20.97
  -8  -3  11    2.15    7.39
   8   3 -10    5.42   10.41
  -8   3  10    6.76    4.83
  -8   3  10    3.35   13.24
  -8  -3  10    5.99    6.69
  -8  -3  10    8.52   18.90
   8  -3 -10    3.13    7.15
  -8   3   9   45.89   12.14
  -8   3   9   57.78    7.25
  -8  -3   9   60.29   20.08
   8  -3  -9   56.77    8.76
  -8   3   8  174.63   12.40
  -8  -3   8  178.97   24.46
   8  -3  -8  161.87   13.37
  -8   3   7  289.65   17.84
   8   3  -7  267.03   22.51
  -8   3   7  311.19   21.73
   8  -3  -7  286.43   18.74
  -8  -3   7  336.46   29.75
  -8  -3   7  288.71   19.27
  -8   3   6  360.29   26.31
   8   3  -6  447.05   29.06
  -8   3   6  409.12   23.80
   8  -3  -6  449.50   28.59
  -8  -3   6  450.70   25.42
   8  -3  -6  429.42   24.58
  -8  -3   6  477.82   33.50
  -8   3   5  591.93   36.90
   8   3  -5  625.59   38.57
  -8   3   5  657.46   36.05
   8   3  -5  618.88   41.18
  -8   3   5  648.64   34.16
  -8  -3   5  667.64   35.56
   8  -3  -5  647.13   34.36
  -8  -3   5  700.60   42.39
   8  -3  -5  672.06   37.92
  -8   3   4  570.66   31.35
   8   3  -4  545.78   33.85
  -8   3   4  562.85   29.70
   8   3  -4  543.46   36.10
  -8   3   4  501.72   31.63
   8  -3  -4  585.63   32.91
  -8  -3   4  596.73   31.24
   8  -3  -4  560.05   29.66
  -8  -3   4  584.95   36.30
  -8   3   3   14.18    3.73
   8   3  -3   15.63    5.61
  -8   3   3   19.21    2.94
   8   3  -3    5.86    8.10
   8   3  -3   15.86    9.19
  -8   3   3   10.40    4.21
  -8   3   3   12.95    4.58
  -8  -3   3   13.80    3.96
  -8  -3   3   18.72    7.32
   8  -3  -3   13.64    2.78
  -8   3   2  158.52    9.56
  -8   3   2  163.21   10.14
   8   3  -2  150.23   16.51
   8   3  -2  172.83   12.97
  -8   3   2  157.05   11.04
   8   3  -2  143.88   15.86
  -8   3   2  158.05   10.56
   8  -3  -2  152.46    9.49
  -8  -3   2  172.26   11.24
  -8  -3   2  172.12   14.71
  -8   3   1  512.17   24.91
   8   3  -1  480.63   26.18
  -8   3   1  390.01   24.83
  -8   3   1  476.91   26.49
   8   3  -1  530.37   28.10
  -8   3   1  459.31   26.06
   8   3  -1  454.85   29.94
  -8   3   1  508.37   25.58
  -8  -3   1  493.60   28.91
  -8  -3   1  519.88   29.25
  -8  -3   1  532.80   26.79
   8  -3  -1  511.77   25.23
  -8   3   0   -2.73    2.75
  -8   3   0   -0.12    1.18
   8   3   0    6.95    6.15
   8   3   0    0.40    3.16
   8   3   0    5.90    3.65
  -8   3   0   -2.23    1.88
  -8   3   0    2.13    3.97
  -8   3   0   -2.05    2.57
  -8  -3   0    4.24    4.72
  -8  -3   0    2.93    7.45
  -8  -3   0    2.21    4.08
   8  -3   0   -0.44    1.43
   8  -3   0    0.39    3.77
  -8  -3   0    0.65    2.57
  -8   3  -1  690.82   34.97
   8   3   1  763.26   37.28
  -8   3  -1  766.02   40.01
  -8   3  -1  749.81   36.86
   8   3   1  806.12   44.08
  -8   3  -1  713.89   34.99
   8   3   1  756.52   37.68
   8   3   1  777.69   40.77
   8   3   1  679.96   45.80
  -8   3  -1  620.73   36.67
  -8  -3  -1  790.95   37.56
   8  -3   1  798.97   36.79
  -8  -3  -1  764.32   44.22
   8  -3   1  796.66   39.85
  -8  -3  -1  722.64   39.05
   8   3   2    2.48    7.77
   8   3   2    0.56    2.99
  -8   3  -2    3.46    3.70
  -8   3  -2    0.67    6.35
  -8   3  -2   -1.73    2.45
   8   3   2    1.20    4.74
   8   3   2   -0.55    2.25
   8   3   2    5.37    6.10
   8  -3   2    4.04    3.68
  -8  -3  -2    3.30    8.06
  -8  -3  -2   -0.44    4.06
   8  -3   2    8.39    5.32
   8  -3   2    0.76    1.92
  -8  -3  -2   -0.89    2.44
  -8   3  -3  481.62   25.87
  -8   3  -3  527.52   31.19
   8   3   3  488.39   25.89
   8   3   3  498.92   29.26
   8   3   3  513.26   26.48
  -8   3  -3  478.48   28.49
   8   3   3  515.48   34.09
   8   3   3  469.47   31.38
   8  -3   3  515.32   26.34
   8  -3   3  532.41   29.42
  -8  -3  -3  477.68   26.38
   8  -3   3  462.78   30.11
  -8  -3  -3  467.72   27.22
   8   3   4    8.22    7.55
   8   3   4   22.22    6.66
  -8   3  -4   20.30    8.23
   8   3   4   28.83    3.72
  -8   3  -4   26.57    7.35
   8   3   4   22.06    4.17
   8   3   4   16.27    7.24
  -8  -3  -4   24.22    4.75
   8  -3   4   21.22    8.42
   8  -3   4   21.92    7.05
   8  -3   4   28.92    3.93
  -8   3  -5  715.35   39.51
   8   3   5  621.15   41.49
   8   3   5  616.38   40.13
   8   3   5  672.71   33.54
   8  -3   5  619.56   34.03
   8  -3   5  632.00   39.56
   8  -3   5  630.32   39.70
   8   3   6  638.40   33.52
   8   3   6  645.10   41.45
   8   3   6  647.18   42.23
   8  -3   6  643.25   40.48
   8  -3   6  684.34   41.98
   8   3   7 1146.65   66.95
   8   3   7 1127.27   57.51
   8   3   7 1179.08   67.03
   8  -3   7 1307.48   68.53
   8  -3   7 1103.33   64.97
   8   3   8   91.13   14.90
   8   3   8   82.62   15.67
   8   3   8   85.02    7.43
   8  -3   8   71.76   16.56
   8  -3   8   55.48   12.15
   8   3   9   85.60   15.99
   8   3   9  101.90    8.87
   8   3   9  118.66   18.51
   8  -3   9  123.88   20.74
   8   3  10  223.25   14.97
   8   3  10  190.40   23.72
  -8   3 -10  232.84   24.26
   8   3  10  180.95   24.67
   8  -3  10  259.87   28.34
   8   3  11  310.10   19.16
   8   3  11  301.20   28.82
   8   3  11  261.19   29.40
   8  -3  11  281.70   32.59
  -8  -3 -12    8.80   11.10
  -8   4  11   39.76    7.40
  -8  -4  11   60.96   24.36
  -8  -4  11   28.00    9.84
   8   4 -10   27.44   11.97
  -8   4  10   24.12    5.95
  -8   4  10    5.57   11.16
  -8  -4  10   11.14   19.35
  -8  -4  10   32.50    9.94
  -8   4   9  875.24   53.47
   8   4  -9  930.41   60.61
  -8  -4   9 1011.52   68.10
  -8  -4   9  943.43   55.42
   8   4  -8   84.61   13.79
  -8   4   8   66.44   12.46
  -8   4   8   74.61    7.96
   8  -4  -8   78.28    8.10
  -8  -4   8   90.44   20.38
  -8  -4   8   87.94   10.62
   8   4  -7 1727.61   95.24
  -8   4   7 1721.04   94.45
  -8   4   7 1741.41   88.76
   8  -4  -7 1843.54   88.51
  -8  -4   7 1820.66  100.35
   8   4  -6 1202.58   65.51
  -8   4   6 1131.85   59.45
  -8   4   6 1099.92   64.36
  -8  -4   6 1196.54   61.17
  -8  -4   6 1270.57   70.38
   8  -4  -6 1191.15   58.88
   8  -4  -6 1183.29   65.66
  -8   4   5 2180.72  108.69
   8   4  -5 2199.75  114.21
  -8   4   5 2278.93  113.34
  -8  -4   5 2262.18  110.40
  -8  -4   5 2267.67  117.82
   8  -4  -5 2344.35  114.74
   8  -4  -5 2193.68  107.81
  -8   4   4  251.75   16.35
  -8   4   4  232.53   14.61
   8   4  -4  251.73   19.43
  -8   4   4  252.77   17.97
  -8  -4   4  252.92   16.31
   8  -4  -4  254.55   13.84
  -8  -4   4  243.08   21.62
  -8   4   3  849.76   48.31
  -8   4   3  886.89   47.61
   8   4  -3  884.68   53.66
   8   4  -3  976.59   51.22
  -8   4   3  933.15   46.32
   8   4  -3 1091.66   57.84
  -8   4   3  854.50   47.18
   8  -4  -3  916.24   45.46
  -8  -4   3  964.05   48.21
  -8  -4   3  906.64   52.94
  -8   4   2  664.90   34.68
  -8   4   2  667.54   32.84
   8   4  -2  640.87   39.95
   8   4  -2  718.52   37.07
  -8   4   2  590.90   33.58
  -8   4   2  579.11   34.24
   8  -4  -2  625.03   32.21
  -8  -4   2  693.42   39.37
  -8  -4   2  668.21   34.74
  -8   4   1  312.86   19.97
   8   4  -1  382.74   22.55
  -8   4   1  333.18   20.09
   8   4  -1  347.95   25.32
  -8   4   1  372.45   21.65
  -8   4   1  298.76   20.57
  -8   4   1  360.64   19.17
  -8  -4   1  360.98   24.36
  -8  -4   1  356.86   21.06
  -8  -4   1  340.15   23.24
   8  -4  -1  441.09   20.07
  -8   4   0  416.54   23.42
   8   4   0  395.64   26.10
  -8   4   0  384.69   19.84
  -8   4   0  354.51   20.92
  -8   4   0  353.47   22.43
  -8   4   0  379.64   22.62
  -8   4   0  399.15   19.96
   8   4   0  406.83   22.76
   8   4   0  423.48   31.04
  -8  -4   0  357.06   24.63
  -8  -4   0  374.46   23.97
   8  -4   0  421.35   22.02
  -8  -4   0  407.67   22.16
   8  -4   0  382.36   20.48
   8   4   1  117.24   16.56
   8   4   1  105.80   12.47
  -8   4  -1  112.38    6.33
  -8   4  -1  109.26   10.61
   8   4   1  119.63    8.73
  -8   4  -1  128.69   10.65
   8   4   1  103.93   14.13
  -8   4  -1  104.41    6.17
  -8   4  -1  120.06    7.84
  -8  -4  -1  121.76   10.58
   8  -4   1  122.11    9.80
   8  -4   1  123.79    7.76
  -8  -4  -1  111.36    8.57
   8  -4   1  117.45    8.40
   8   4   2    1.45    8.91
   8   4   2    6.75    7.52
   8   4   2   -1.75    2.50
  -8   4  -2    1.99    2.32
  -8   4  -2    7.27    6.09
  -8   4  -2    0.69    6.33
   8   4   2    1.51    6.72
   8  -4   2   -3.01    5.04
   8  -4   2    0.27    2.28
   8  -4   2    3.59    4.41
  -8  -4  -2    0.71    2.81
  -8  -4  -2   -3.05    4.90
   8   4   3 1084.14   54.08
  -8   4  -3 1154.42   59.84
  -8   4  -3  946.70   56.93
   8   4   3 1119.72   62.03
   8   4   3 1119.79   64.46
  -8  -4  -3 1018.98   55.91
   8  -4   3 1119.12   57.62
   8  -4   3 1106.70   54.55
   8  -4   3 1081.24   58.39
  -8  -4  -3 1084.51   55.16
   8   4   4  172.42   18.35
   8   4   4  184.30   11.61
   8   4   4  184.12   19.64
   8  -4   4  166.91   15.80
   8  -4   4  210.25   12.56
   8  -4   4  201.05   17.08
  -8  -4  -4  191.43   13.48
   8   4   5  927.78   45.89
   8   4   5  866.44   54.85
   8   4   5  821.74   53.04
   8  -4   5  854.19   51.36
   8  -4   5  872.11   52.91
   8   4   6  371.09   29.41
   8   4   6  358.18   28.28
   8   4   6  364.26   20.24
   8  -4   6  365.60   26.54
   8  -4   6  382.94   28.97
   8   4   7  107.93    8.23
   8   4   7  124.83   16.41
   8   4   7   80.16   14.89
   8  -4   7  103.12   18.41
   8  -4   7  112.73   14.70
   8   4   8  434.81   24.13
   8   4   8  430.10   33.88
   8   4   8  435.73   34.69
   8  -4   8  436.68   31.91
   8  -4   8  441.93   35.21
  -8   4  -9   56.57   13.42
   8   4   9   39.46   14.20
   8   4   9   51.28   16.03
   8  -4   9   66.86   13.21
   8  -4   9   81.94   19.12
   8   4  10    1.58    4.08
   8   4  10  -10.10   14.80
  -8   4 -10   -8.52   12.38
   8   4  10  -11.99   13.26
   8  -4  10   11.94   16.73
   8  -4  10    2.93   10.75
   8   4  11   37.62    6.58
   8  -4  11   48.42   20.90
  -8   5  10   42.32    7.15
   8   5 -10   55.19   14.58
  -8  -5  10   44.69    9.47
  -8  -5  10   38.65   21.18
   8   5  -9   15.74   11.33
  -8   5   9   50.20    6.88
  -8  -5   9   32.91    8.80
  -8  -5   9   39.56   19.09
  -8   5   8  212.74   15.46
   8   5  -8  239.24   22.39
  -8  -5   8  275.90   29.24
  -8  -5   8  253.31   18.14
   8   5  -7  115.98   15.50
  -8   5   7  119.78   15.65
  -8   5   7  123.03   10.04
  -8  -5   7  138.98   12.60
  -8  -5   7  120.75   20.42
   8   5  -6  272.05   21.47
  -8   5   6  231.01   15.07
  -8   5   6  236.92   20.04
  -8  -5   6  229.43   24.32
   8  -5  -6  237.10   13.08
   8   5  -5 1121.37   59.12
  -8   5   5 1036.53   52.85
  -8   5   5  975.96   56.80
  -8  -5   5 1113.33   63.12
   8  -5  -5 1024.33   50.56
   8   5  -4  452.83   29.87
  -8   5   4  441.59   24.65
  -8   5   4  403.45   27.76
   8  -5  -4  452.81   22.94
  -8  -5   4  517.31   34.13
  -8  -5   4  482.66   26.76
   8   5  -3  147.34   14.17
  -8   5   3  128.28   12.65
  -8   5   3  141.88   10.16
  -8  -5   3  150.46   11.94
   8  -5  -3  178.20    9.56
  -8  -5   3  177.02   17.89
   8   5  -2   59.16   13.27
   8   5  -2   91.25    9.86
  -8   5   2   63.04    8.46
  -8   5   2   72.27    6.01
  -8  -5   2   82.56    7.89
  -8  -5   2   80.27   12.10
   8  -5  -2   78.24    5.28
  -8   5   1   68.72    8.92
   8   5  -1  108.86    9.89
  -8   5   1  100.75    6.81
   8   5  -1   73.49   14.60
  -8   5   1   77.42    6.13
   8  -5  -1   91.73    6.13
  -8  -5   1  100.59    8.41
  -8  -5   1  100.76   11.71
   8   5   0  876.82   45.09
  -8   5   0  721.08   45.86
   8   5   0  887.79   55.07
  -8   5   0  832.53   42.10
  -8   5   0  838.93   42.90
  -8  -5   0  878.27   44.64
   8  -5   0  877.09   42.66
  -8  -5   0  804.04   47.91
  -8  -5   0  858.12   46.85
  -8   5  -1  553.54   28.96
   8   5   1  544.03   38.97
   8   5   1  546.80   40.06
   8   5   1  545.35   30.17
  -8  -5  -1  578.32   30.67
   8  -5   1  505.61   30.28
  -8  -5  -1  542.64   32.35
   8  -5   1  580.11   29.10
   8  -5   1  568.47   30.91
   8   5   2    8.29   11.42
   8   5   2    1.24    2.85
  -8   5  -2    5.82    2.77
   8   5   2    5.48    9.08
  -8   5  -2    2.21    6.89
   8  -5   2    2.24    4.68
   8  -5   2    4.11    2.49
  -8  -5  -2    5.06    3.55
  -8  -5  -2   11.03    6.14
   8  -5   2    4.05    4.75
   8   5   3  462.58   36.77
  -8   5  -3  498.77   31.63
   8   5   3  494.39   26.01
   8   5   3  493.78   34.82
   8  -5   3  539.12   30.34
  -8  -5  -3  477.22   27.38
   8  -5   3  486.34   29.88
  -8  -5  -3  478.26   28.50
   8   5   4  222.24   20.90
   8   5   4  143.96   19.56
   8   5   4  190.87   11.65
  -8  -5  -4  172.60   13.84
   8  -5   4  187.93   16.79
   8  -5   4  212.61   16.58
   8   5   5  403.16   32.34
   8   5   5  423.42   22.60
   8   5   5  391.75   31.47
   8  -5   5  404.71   29.37
   8  -5   5  384.11   27.58
   8   5   6   73.14   14.55
   8   5   6   74.87    6.24
   8   5   6   60.54   12.83
   8  -5   6   66.92   11.64
   8  -5   6   79.59   14.63
   8   5   7  175.96   20.49
   8   5   7  173.06   20.47
   8  -5   7  157.27   16.81
   8  -5   7  163.24   20.94
  -8   5  -8    1.52   10.94
   8   5   8   -1.70   11.40
   8   5   8    4.81   11.45
   8  -5   8    6.30    9.30
   8  -5   8    8.24   16.13
   8   5   9  324.38   30.70
  -8   5  -9  295.83   28.24
   8   5   9  300.80   28.75
   8  -5   9  354.04   33.87
   8  -5   9  293.92   25.86
   8   5  10   -1.74   11.53
   8   5  10   21.84    5.52
   8  -5  10   41.02   20.09
   8  -5  11   88.07   24.06
  -8   6   9  257.43   18.04
   8   6  -9  272.45   25.98
  -8  -6   9  272.95   20.27
  -8  -6   9  301.85   32.60
   8   6  -8  120.26   17.16
  -8   6   8  114.81   10.45
  -8  -6   8  145.26   13.06
  -8  -6   8  138.30   23.44
   8   6  -7  945.18   54.26
  -8   6   7  826.49   46.07
  -8  -6   7  965.52   59.33
  -8  -6   7  899.93   48.29
   8   6  -6   14.05    9.60
  -8   6   6    8.54    3.90
  -8  -6   6    8.24    5.67
  -8  -6   6    8.37   12.87
  -8   6   5  359.86   21.38
   8   6  -5  410.15   28.16
  -8  -6   5  391.68   31.37
  -8   6   4    7.41    3.06
   8   6  -4    0.96    7.84
   8   6  -3 1243.61   69.86
  -8   6   3 1022.36   54.64
   8   6  -3 1105.90   59.68
  -8  -6   3 1175.97   64.50
  -8  -6   3 1146.44   57.24
   8   6  -2    4.35    5.74
  -8   6   2   -1.79    2.80
   8   6  -2   -1.77   10.87
  -8  -6   2    0.53    3.89
   8  -6  -2    0.32    1.72
  -8  -6   2   -3.43    8.01
  -8   6   1   97.50    7.35
   8   6  -1   90.83   17.22
   8   6  -1   95.40   10.11
  -8  -6   1   99.85    9.28
  -8  -6   1   81.52   12.13
   8  -6  -1  111.14    6.91
   8   6   0  132.48   10.70
   8   6   0  106.78   18.17
   8  -6   0  131.63    8.24
  -8  -6   0  105.06    9.96
  -8  -6   0  123.92   13.92
   8   6   1  768.95   40.19
   8   6   1  774.25   52.53
   8   6   1  715.83   50.37
   8  -6   1  737.59   41.33
  -8  -6  -1  770.17   40.84
   8   6   2  630.72   33.02
   8   6   2  581.22   45.71
   8   6   2  569.89   42.86
  -8  -6  -2  643.62   34.61
   8  -6   2  642.89   35.23
  -8  -6  -2  618.78   36.00
   8  -6   2  589.29   35.64
   8   6   3   91.90   14.94
   8   6   3   68.84   15.67
   8   6   3   63.40    5.79
   8  -6   3   78.24    9.13
  -8  -6  -3   68.23    7.69
   8  -6   3   79.88   10.43
  -8  -6  -3   69.74    9.25
   8   6   4  233.97   25.10
   8   6   4  232.31   23.93
   8  -6   4  258.11   20.25
   8  -6   4  248.62   18.90
   8   6   5  660.08   47.09
   8   6   5  639.47   47.44
   8  -6   5  764.76   42.74
   8  -6   5  704.27   43.68
   8   6   6   30.88   13.20
   8   6   6   19.44   13.07
  -8   6  -6   36.05   11.65
   8  -6   6   23.44    8.62
   8  -6   6   32.54   12.43
   8   6   7  195.35   23.07
  -8   6  -7  195.86   21.26
   8   6   7  213.47   23.58
   8  -6   7  183.94   18.74
   8  -6   7  232.68   23.30
   8   6   8   31.62   14.45
   8   6   8   32.53   14.17
  -8   6  -8   23.71   12.47
   8  -6   8   35.69   15.47
   8  -6   8   13.65   10.03
  -8   6  -9  114.96   18.43
   8   6   9   98.20   18.92
   8  -6   9   98.47   15.70
   8  -6   9  116.53   21.33
   8  -6  10   38.73   19.66
   8   7  -8   29.27   12.83
  -8   7   8   25.66    6.13
  -8  -7   8   25.28   17.54
  -8  -7   8   33.95    8.52
  -8   7   7    2.10    4.24
   8   7  -7   -1.34    9.49
  -8  -7   7    3.58    6.68
  -8  -7   7    7.88   14.80
   8   7  -6  976.22   57.94
  -8   7   6  971.30   50.76
  -8  -7   6  949.89   52.76
  -8  -7   6 1043.07   63.70
   8   7  -5  687.45   41.48
  -8   7   5  624.41   34.53
  -8  -7   5  613.80   45.10
  -8  -7   5  638.81   36.65
  -8   7   4   39.99    5.41
   8   7  -4   58.79   10.72
  -8  -7   4   37.49   12.63
   8   7  -3   32.48    8.09
   8   7  -3   30.80   14.21
  -8   7   3   28.17    4.47
  -8  -7   3   32.23   11.56
   8   7  -2  292.29   21.02
   8   7  -2  330.35   30.88
  -8  -7   2  286.07   19.32
  -8  -7   2  289.97   24.75
   8   7  -1   14.05   14.72
   8   7  -1    8.06    5.30
  -8  -7   1   17.93    5.11
  -8  -7   1   22.73    9.50
   8   7   0    0.52    4.70
   8   7   0    6.00   12.56
  -8  -7   0   -4.96    5.03
  -8  -7   0   -8.03    7.68
   8   7   1   74.41   17.46
   8   7   1   67.81   18.40
   8  -7   1   50.84    8.22
  -8  -7  -1   72.25    8.39
   8   7   2  135.27   21.24
   8   7   2  123.22   19.89
   8  -7   2  132.29   12.82
  -8  -7  -2  134.67   11.36
   8   7   3  783.21   54.01
   8   7   3  826.90   56.77
   8  -7   3  846.40   47.07
  -8  -7  -3  798.58   44.05
   8   7   4   11.46   13.76
   8   7   4   -5.30   11.82
  -8   7  -4    1.15    8.96
   8  -7   4    6.17    8.02
   8   7   5    5.35   10.93
  -8   7  -5   11.45   10.83
   8   7   5   -1.83   13.72
   8  -7   5    1.15    9.35
   8  -7   5    5.39    7.37
   8   7   6  240.84   26.55
  -8   7  -6  271.82   24.50
   8   7   6  243.87   27.11
   8  -7   6  278.13   21.81
   8  -7   6  273.75   24.06
  -8   7  -7   -4.51   11.47
   8   7   7   -1.77   11.86
   8   7   7    3.76   12.71
   8  -7   7    5.55    8.47
   8  -7   7    5.85   12.31
  -8   7  -8   66.29   15.25
   8   7   8   84.26   18.13
   8  -7   8   71.99   13.05
   8  -7   8   46.35   16.37
   8  -7   9  147.82   23.52
  -8   8   7   33.64    6.48
   8   8  -7   30.76   12.23
  -8  -8   7   36.29    8.36
   8   8  -6   10.35   10.31
  -8   8   6    6.82    4.37
  -8  -8   6    6.74    6.14
  -8  -8   6   11.91   14.79
   8   8  -5   -3.52    9.22
  -8   8   5    5.39    3.80
   8   8  -5   14.67   16.36
  -8  -8   5    4.31    5.89
  -8  -8   5   14.69   12.76
   8   8  -4   23.49   16.57
   8   8  -4   36.27   10.47
  -8  -8   4   43.52   14.00
  -8  -8   4   37.20    7.69
   8   8  -3   25.36    8.98
   8   8  -3   25.34   15.30
  -8  -8   3   21.37   12.05
   8   8  -2  697.24   51.13
  -8  -8   2  603.75   42.58
  -8  -8   1   34.34    6.77
  -8  -8   1   21.48   11.11
   8   8   0   -4.49   14.56
  -8  -8   0   -2.61    9.97
  -8  -8   0    1.84    4.47
   8   8   1    6.85   14.21
   8   8   1   26.70   15.22
  -8  -8  -1   27.99    6.62
   8  -8   1   17.98    6.83
   8   8   2  838.51   55.58
   8   8   2  750.55   55.45
  -8  -8  -2  715.11   40.62
   8  -8   2  723.10   42.72
   8   8   3  199.98   28.48
   8   8   3  213.79   26.92
   8  -8   3  246.29   19.83
  -8  -8  -3  236.43   17.26
   8   8   4  611.88   46.39
   8   8   4  556.26   46.33
   8  -8   4  639.67   39.56
   8   8   5   18.05   14.71
   8   8   5   26.09   14.60
   8  -8   5    8.85    9.45
   8   8   6   -8.09   15.31
   8   8   6  -15.23   15.50
   8  -8   6   -4.12   10.32
   8   8   7   -1.89   13.61
  -8  -9   4  132.44   21.02
  -8  -9   4  179.62   15.00
   8   9  -3   59.13   20.57
  -8  -9   3   33.81    7.63
  -8  -9   3   41.53   14.76
   8   9  -2   53.37   19.93
  -8  -9   2   69.60    9.62
  -8  -9   2   64.55   14.86
   8   9  -1   20.03   17.94
  -8  -9   1   34.64   12.67
   8   9   0    2.50   17.20
  -8  -9   0   -1.48   10.17
   8   9   1  106.26   24.35
   8   9   1  104.87   23.69
  -8  -9  -1  109.52   11.43
   8  -9   1  100.88   12.66
   8   9   2  346.43   36.50
   8   9   2  275.24   32.17
  -8  -9  -2  288.13   20.52
   8  -9   2  298.01   22.41
   8   9   3  102.16   23.93
   8   9   3   72.57   19.62
   8   9   4  275.98   33.59
   8   9   5    8.67   14.64
  -9   0  12  599.08   48.00
   9   0 -12  522.00   37.03
   9   0 -11   -1.21    9.99
  -9   0  11    6.26   17.32
  -9   0  11   -4.65    5.66
   9   0 -10 2041.93  107.36
  -9   0  10 2048.23  102.99
  -9   0  10 1922.40  113.97
  -9   0   9   13.41   14.36
  -9   0   9   -0.56    4.37
   9   0  -9    6.13    7.85
   9   0  -8   50.12   10.15
   9   0  -8   43.96    8.94
  -9   0   8   36.08    6.13
  -9   0   8   41.34   14.44
   9   0  -7   -0.57    5.25
  -9   0   7   -0.47    3.54
   9   0  -7   -0.85    6.38
  -9   0   7   -1.28   11.23
   9   0  -6  362.31   24.68
  -9   0   6  344.22   20.52
   9   0  -6  344.58   20.87
  -9   0   6  345.15   26.45
   9   0  -6  343.26   23.47
   9   0  -5    0.71    5.89
  -9   0   5    2.69    3.33
  -9   0   5    7.98    8.59
   9   0  -5   -1.34    4.90
   9   0  -5    1.49    3.62
   9   0  -5    3.69    6.13
   9   0  -4   22.82    3.59
   9   0  -4   21.12    7.10
  -9   0   4   18.55    6.66
   9   0  -4   21.29    5.73
   9   0  -4   22.21    5.52
  -9   0   4   25.31    4.07
  -9   0   4   16.68    7.86
   9   0  -3   -0.50    3.75
  -9   0   3   -0.98    5.56
  -9   0   3   -0.30    2.57
  -9   0   3    1.17    5.46
   9   0  -3    1.41    5.54
   9   0  -3    2.38    2.16
   9   0  -3    0.35    2.37
   9   0  -2  214.30   13.61
  -9   0   2  220.26   13.03
   9   0  -2  209.29   17.04
   9   0  -2  213.76   12.45
  -9   0   2  182.28   15.02
  -9   0   2  239.20   13.55
   9   0  -1    1.46    5.71
  -9   0   1    3.24    4.45
  -9   0   1   -1.40    2.99
  -9   0   1   -5.09    6.25
   9   0  -1    2.78    2.88
   9   0  -1    1.49    2.04
  -9   0   1    0.16    1.60
  -9   0   0 7610.56  383.74
  -9   0   0 8302.54  381.95
   9   0   0 8142.51  381.55
  -9   0   0 7950.45  386.98
   9   0   0 8275.41  387.27
   9   0   0 7639.19  382.75
   9   0   0 7869.89  381.97
   9   0   1   -0.90    1.84
   9   0   1    2.24    2.60
  -9   0  -1    1.02    1.78
  -9   0  -1    0.86    8.05
   9   0   1    0.27    2.01
   9   0   1    3.73    5.56
  -9   0  -1    1.49    3.49
  -9   0  -2 6591.10  323.59
   9   0   2 6779.70  322.82
  -9   0  -2 6696.76  321.64
   9   0   2 6519.38  324.10
   9   0   2 6897.99  322.87
   9   0   2 6890.80  321.63
  -9   0  -2 6508.94  329.71
   9   0   2 6307.77  327.88
   9   0   3    0.56    4.42
  -9   0  -3    0.33    2.94
   9   0   3    0.90    6.23
  -9   0  -3   -0.56    5.16
   9   0   3    0.86    2.11
  -9   0  -3    7.35    8.71
   9   0   3   -3.20    2.53
   9   0   4 2495.40  130.38
   9   0   4 2596.96  125.45
  -9   0  -4 2589.39  130.36
   9   0   4 2423.36  132.97
   9   0   4 2707.24  127.00
  -9   0  -5    7.22    7.28
   9   0   5    0.84    1.97
   9   0   5    0.33    2.46
   9   0   5    3.06    5.70
   9   0   6  178.51   10.32
  -9   0  -6  199.62   17.46
   9   0   6  178.18   11.85
   9   0   6  188.73   10.51
   9   0   7   -3.94   10.09
   9   0   7   -0.96    6.21
   9   0   7   -1.22    3.22
   9   0   7    0.88    2.68
   9   0   7    1.04    2.23
   9   0   8  476.05   23.98
   9   0   8  411.52   33.27
   9   0   8  433.86   25.69
   9   0   8  383.78   31.30
   9   0   9   -1.55   10.03
   9   0   9    1.54   10.07
   9   0  10  433.64   35.44
   9   0  10  436.61   36.75
   9   0  11    6.40   15.77
[truncated: 167,686 more chars]
