# Supplementary material for: Rationalisation of Patterns of Competing Reactivity by X-ray Structure Determination: Reaction of Isomeric (Benzyloxythienyl)oxazolines with a Base
Source: Molecules. 2021 Dec 20;26(24):7690. doi: 10.3390/molecules26247690 (PMC8705950; doi:10.3390/molecules26247690)
Supplement: Supplementary file 1 [file molecules-26-07690-s001.zip › 21Mol supp mater/cpd 20.cif]

data_20

# start Validation Reply Form
_vrf_PLAT097_20
;
PROBLEM: Large Reported Max.  (Positive) Residual Density       2.38 eA-3  
RESPONSE: Disorder in chlorinated solvent.
;
# end Validation Reply Form
_audit_creation_date                               2017-01-26
_audit_creation_method                            'by CrystalStructure 4.2'

_publ_section_references
;
    ENTER OTHER REFERENCES

    Rigaku (2015). CrystalStructure. Version 4.2. 
    Rigaku Corporation, Tokyo, Japan.

    Burla, M. C., Caliandro, R., Camalli, M., Carrozzini, B., 
    Cascarano, G. L., Giacovazzo, C., Mallamo, M., Mazzone, A., 
    Polidori, G. and Spagna, R. 
    (2012). J. Appl. Cryst. 45, 357-361.
    SIR2011

    Sheldrick, G.M. (2008) SHELXL Version 2014/7, Acta Cryst. A64, 112-122.

    Rigaku (1998). REQAB. 
    Rigaku Corporation, Tokyo, Japan.

;


_chemical_formula_sum                             'C36 H42 Cl2 N2 O7 S2'
_chemical_formula_moiety                          'C36 H42 Cl2 N2 O7 S2'
_chemical_formula_weight                           749.76
_chemical_melting_point                            ?

#==============================================================================
# CRYSTAL DATA
_space_group_crystal_system                        monoclinic
_space_group_name_H-M_alt                         'P 1 21/n 1'
_space_group_name_Hall                            '-P 2yn'
_space_group_IT_number                             14
loop_
_space_group_symop_id
_space_group_symop_operation_xyz
1   '+X,+Y,+Z'
2   '1/2-X,1/2+Y,1/2-Z'
3   '-X,-Y,-Z'
4   '-1/2+X,-1/2-Y,-1/2+Z'
#------------------------------------------------------------------------------
_cell_length_a                                     17.4520
_cell_length_b                                     9.9840
_cell_length_c                                     21.1050
_cell_angle_alpha                                  90.0000
_cell_angle_beta                                   92.3760
_cell_angle_gamma                                  90.0000
_cell_volume                                       3674.1899
_cell_formula_units_Z                              4
_cell_measurement_reflns_used                      3774
_cell_measurement_theta_min                        2.80
_cell_measurement_theta_max                        26.40
_cell_measurement_temperature                      93
#------------------------------------------------------------------------------
_exptl_crystal_description                         prism
_exptl_crystal_colour                              yellow
_exptl_crystal_size_max                            0.100
_exptl_crystal_size_mid                            0.100
_exptl_crystal_size_min                            0.100
_exptl_crystal_density_diffrn                      1.355
_exptl_crystal_density_meas                        ?
_exptl_crystal_density_method                     'not measured'
_exptl_crystal_F_000                               1576.00
_exptl_absorpt_coefficient_mu                      0.340
_exptl_absorpt_correction_type                     multi-scan
_exptl_absorpt_process_details                    'REQAB (Rigaku, 1998)'
_exptl_absorpt_correction_T_min                    0.699
_exptl_absorpt_correction_T_max                    0.967

#==============================================================================
# EXPERIMENTAL DATA

_diffrn_ambient_temperature                        93
_diffrn_radiation_type                            'Mo K\a'
_diffrn_radiation_wavelength                       0.71075
_diffrn_measurement_device_type                   'Rigaku XtaLAB P200'
_diffrn_measurement_method                         \w
_diffrn_detector_area_resol_mean                   5.814
_diffrn_reflns_number                              43115
_diffrn_reflns_av_R_equivalents                    0.0878
_diffrn_reflns_theta_max                           25.312
_diffrn_reflns_theta_min                           2.351
_diffrn_reflns_theta_full                          25.242
_diffrn_measured_fraction_theta_max                0.998
_diffrn_measured_fraction_theta_full               0.999
_diffrn_reflns_Laue_measured_fraction_max          0.998
_diffrn_reflns_Laue_measured_fraction_full         0.999
_diffrn_reflns_point_group_measured_fraction_max   0.998
_diffrn_reflns_point_group_measured_fraction_full  0.999
_diffrn_reflns_limit_h_min                        -20
_diffrn_reflns_limit_h_max                         20
_diffrn_reflns_limit_k_min                        -11
_diffrn_reflns_limit_k_max                         11
_diffrn_reflns_limit_l_min                        -25
_diffrn_reflns_limit_l_max                         25
_diffrn_standards_number                           0
_diffrn_standards_interval_count                   .
_diffrn_standards_decay_%                          ?
_reflns_number_total                               6666
_reflns_number_gt                                  4473
_reflns_threshold_expression                       F^2^>2.0\s(F^2^)
_reflns_Friedel_coverage          0.000
_reflns_Friedel_fraction_max      .
_reflns_Friedel_fraction_full     .

#==============================================================================
# REFINEMENT DATA

_refine_special_details
;
    Refinement was performed using all reflections. The weighted 
    R-factor (wR) and goodness of fit (S) are based on F^2^.
    R-factor (gt) are based on F. The threshold expression of
    F^2^ > 2.0 sigma(F^2^) is used only for calculating R-factor (gt).
;
_refine_ls_structure_factor_coef                   Fsqd
_refine_ls_R_factor_all                            0.1329
_refine_ls_R_factor_gt                             0.0929
_refine_ls_wR_factor_ref                           0.2732
_refine_ls_wR_factor_gt                            0.2464
_refine_ls_number_restraints                       4
_refine_ls_hydrogen_treatment                      mixed
_refine_ls_number_reflns                           6666
_refine_ls_number_parameters                       458
_refine_ls_goodness_of_fit_ref                     1.077
_refine_ls_weighting_scheme                        calc
_refine_ls_weighting_details
          'w = 1/[\s^2^(Fo^2^)+(0.1279P)^2^+14.3098P] where P=(Fo^2^+2Fc^2^)/3'
_atom_sites_solution_hydrogens                     geom
_atom_sites_solution_primary                       direct
_atom_sites_solution_secondary                     difmap
_refine_ls_shift/su_max                            0.000
_refine_diff_density_max                           2.38
_refine_diff_density_min                          -1.01
_refine_ls_extinction_method                       none
_refine_ls_extinction_coef                         ?

loop_
_atom_type_symbol
_atom_type_description
_atom_type_scat_dispersion_real
_atom_type_scat_dispersion_imag
_atom_type_scat_source
  'C' 'C'  0.0033 0.0016 
;
International Tables for Crystallography
(Vol. C, Tables 4.2.6.8 and 6.1.1.4)
;
  'H' 'H'  0.0000 0.0000 
;
International Tables for Crystallography
(Vol. C, Table 6.1.1.4)
;
  'N' 'N'  0.0061 0.0033 
;
International Tables for Crystallography
(Vol. C, Tables 4.2.6.8 and 6.1.1.4)
;
  'O' 'O'  0.0106 0.0060 
;
International Tables for Crystallography
(Vol. C, Tables 4.2.6.8 and 6.1.1.4)
;
  'S' 'S'  0.1246 0.1234 
;
International Tables for Crystallography
(Vol. C, Tables 4.2.6.8 and 6.1.1.4)
;
  'Cl' 'Cl'  0.1484 0.1585 
;
International Tables for Crystallography
(Vol. C, Tables 4.2.6.8 and 6.1.1.4)
;

#==============================================================================
# ATOMIC COORDINATES AND THERMAL PARAMETERS

loop_
 _atom_site_label
 _atom_site_type_symbol
 _atom_site_fract_x
 _atom_site_fract_y
 _atom_site_fract_z
 _atom_site_U_iso_or_equiv
 _atom_site_adp_type
 _atom_site_occupancy
 _atom_site_site_symmetry_order  
 _atom_site_calc_flag
 _atom_site_refinement_flags_posn
 _atom_site_refinement_flags_adp
 _atom_site_refinement_flags_occupancy
 _atom_site_disorder_assembly
 _atom_site_disorder_group
Cl1 Cl 0.32557(15) 0.3701(3) 0.37339(16) 0.0992(9) Uani 1 1 d . . . . .
Cl2 Cl 0.47487(11) 0.4033(2) 0.43741(9) 0.0559(5) Uani 1 1 d . . . . .
S1 S 0.19548(8) 0.26525(16) 0.23134(7) 0.0341(4) Uani 1 1 d . . . . .
S21 S 0.43505(8) 0.27576(16) 0.09421(7) 0.0344(4) Uani 1 1 d . . . . .
O3 O 0.0019(2) 0.0781(4) 0.2441(2) 0.0393(10) Uani 1 1 d . . . . .
O6 O 0.0270(2) 0.4911(4) 0.09757(18) 0.0294(9) Uani 1 1 d . . . . .
O7 O 0.1282(2) 0.5037(4) 0.16630(18) 0.0285(9) Uani 1 1 d D . . . .
O23 O 0.4670(2) 0.1173(4) 0.25949(19) 0.0350(10) Uani 1 1 d . . . . .
O26 O 0.6732(2) 0.4260(4) 0.17165(18) 0.0307(9) Uani 1 1 d . . . . .
O27 O 0.5544(2) 0.5200(4) 0.14216(18) 0.0300(9) Uani 1 1 d D . . . .
O42 O 0.6631(3) 0.9297(5) 0.1374(3) 0.0636(15) Uani 1 1 d . . . . .
N9 N -0.0182(3) 0.2678(5) 0.1573(2) 0.0275(10) Uani 1 1 d D . . . .
N29 N 0.5843(3) 0.2688(5) 0.2421(2) 0.0264(10) Uani 1 1 d D . . . .
C2 C 0.0987(3) 0.2320(6) 0.2126(3) 0.0301(13) Uani 1 1 d . . . . .
C3 C 0.0716(3) 0.1209(7) 0.2483(3) 0.0350(14) Uani 1 1 d . . . . .
C4 C 0.1319(4) 0.0661(7) 0.2882(3) 0.0397(15) Uani 1 1 d . . . . .
H4 H 0.1258 -0.0086 0.3154 0.048 Uiso 1 1 calc R U . . .
C5 C 0.1991(4) 0.1331(7) 0.2827(3) 0.0405(15) Uani 1 1 d . . . . .
H5 H 0.2448 0.1082 0.3058 0.049 Uiso 1 1 calc R U . . .
C7 C 0.0878(3) 0.4157(5) 0.1278(2) 0.0248(12) Uani 1 1 d . . . . .
C8 C 0.0543(3) 0.3018(6) 0.1673(2) 0.0248(12) Uani 1 1 d . . . . .
C10 C -0.0749(3) 0.3334(6) 0.1145(3) 0.0287(12) Uani 1 1 d . . . . .
C11 C -0.0301(3) 0.4103(6) 0.0656(3) 0.0302(13) Uani 1 1 d . . . . .
H11A H -0.0054 0.3465 0.0369 0.036 Uiso 1 1 calc R U . . .
H11B H -0.0655 0.4678 0.0398 0.036 Uiso 1 1 calc R U . . .
C12 C 0.1409(3) 0.3626(6) 0.0775(3) 0.0293(13) Uani 1 1 d . . . . .
C13 C 0.1901(3) 0.4544(7) 0.0505(3) 0.0354(14) Uani 1 1 d . . . . .
H13 H 0.1935 0.5440 0.0655 0.043 Uiso 1 1 calc R U . . .
C14 C 0.2347(3) 0.4109(9) 0.0005(3) 0.0486(19) Uani 1 1 d . . . . .
H14 H 0.2687 0.4720 -0.0183 0.058 Uiso 1 1 calc R U . . .
C15 C 0.2300(4) 0.2832(9) -0.0212(3) 0.0484(19) Uani 1 1 d . . . . .
H15 H 0.2597 0.2565 -0.0558 0.058 Uiso 1 1 calc R U . . .
C16 C 0.1820(4) 0.1915(8) 0.0066(3) 0.0463(17) Uani 1 1 d . . . . .
H16 H 0.1799 0.1014 -0.0079 0.056 Uiso 1 1 calc R U . . .
C17 C 0.1375(3) 0.2324(6) 0.0553(3) 0.0329(13) Uani 1 1 d . . . . .
H17 H 0.1040 0.1702 0.0740 0.039 Uiso 1 1 calc R U . . .
C18 C -0.1250(3) 0.2249(7) 0.0815(3) 0.0397(15) Uani 1 1 d . . . . .
H18A H -0.1631 0.2675 0.0527 0.048 Uiso 1 1 calc R U . . .
H18B H -0.0925 0.1653 0.0573 0.048 Uiso 1 1 calc R U . . .
H18C H -0.1511 0.1728 0.1135 0.048 Uiso 1 1 calc R U . . .
C19 C -0.1231(3) 0.4287(6) 0.1524(3) 0.0341(14) Uani 1 1 d . . . . .
H19A H -0.1610 0.4728 0.1240 0.041 Uiso 1 1 calc R U . . .
H19B H -0.1495 0.3783 0.1849 0.041 Uiso 1 1 calc R U . . .
H19C H -0.0898 0.4964 0.1729 0.041 Uiso 1 1 calc R U . . .
C22 C 0.4850(3) 0.2428(6) 0.1657(3) 0.0278(12) Uani 1 1 d . . . . .
C23 C 0.4425(3) 0.1543(6) 0.2044(3) 0.0319(13) Uani 1 1 d . . . . .
C24 C 0.3712(3) 0.1185(6) 0.1735(3) 0.0346(14) Uani 1 1 d . . . . .
H24 H 0.3349 0.0605 0.1917 0.041 Uiso 1 1 calc R U . . .
C25 C 0.3606(3) 0.1753(7) 0.1158(3) 0.0374(15) Uani 1 1 d . . . . .
H25 H 0.3159 0.1610 0.0895 0.045 Uiso 1 1 calc R U . . .
C27 C 0.5983(3) 0.4025(5) 0.1453(3) 0.0255(12) Uani 1 1 d . . . . .
C28 C 0.5556(3) 0.2996(6) 0.1855(3) 0.0288(12) Uani 1 1 d . . . . .
C30 C 0.6547(3) 0.3256(6) 0.2733(3) 0.0281(12) Uani 1 1 d . . . . .
C31 C 0.6741(3) 0.4510(6) 0.2381(3) 0.0293(12) Uani 1 1 d . . . . .
H31A H 0.6365 0.5219 0.2471 0.035 Uiso 1 1 calc R U . . .
H31B H 0.7256 0.4829 0.2527 0.035 Uiso 1 1 calc R U . . .
C32 C 0.6117(3) 0.3506(5) 0.0790(3) 0.0264(12) Uani 1 1 d . . . . .
C33 C 0.5853(3) 0.4198(6) 0.0257(3) 0.0280(12) Uani 1 1 d . . . . .
H33 H 0.5574 0.5007 0.0301 0.034 Uiso 1 1 calc R U . . .
C34 C 0.5998(3) 0.3709(6) -0.0342(3) 0.0317(13) Uani 1 1 d . . . . .
H34 H 0.5807 0.4176 -0.0708 0.038 Uiso 1 1 calc R U . . .
C35 C 0.6417(4) 0.2553(7) -0.0410(3) 0.0394(15) Uani 1 1 d . . . . .
H35 H 0.6518 0.2225 -0.0820 0.047 Uiso 1 1 calc R U . . .
C36 C 0.6687(4) 0.1876(7) 0.0123(3) 0.0447(16) Uani 1 1 d . . . . .
H36 H 0.6981 0.1084 0.0077 0.054 Uiso 1 1 calc R U . . .
C37 C 0.6535(3) 0.2335(6) 0.0719(3) 0.0349(14) Uani 1 1 d . . . . .
H37 H 0.6716 0.1850 0.1083 0.042 Uiso 1 1 calc R U . . .
C38 C 0.7180(3) 0.2236(6) 0.2710(3) 0.0344(13) Uani 1 1 d . . . . .
H38A H 0.7648 0.2602 0.2916 0.041 Uiso 1 1 calc R U . . .
H38B H 0.7029 0.1422 0.2933 0.041 Uiso 1 1 calc R U . . .
H38C H 0.7275 0.2020 0.2268 0.041 Uiso 1 1 calc R U . . .
C39 C 0.6361(3) 0.3590(6) 0.3409(3) 0.0342(14) Uani 1 1 d . . . . .
H39A H 0.6815 0.3969 0.3631 0.041 Uiso 1 1 calc R U . . .
H39B H 0.5941 0.4243 0.3408 0.041 Uiso 1 1 calc R U . . .
H39C H 0.6205 0.2773 0.3627 0.041 Uiso 1 1 calc R U . . .
C41 C 0.5628(7) 0.8933(15) 0.0606(4) 0.123(6) Uani 1 1 d . . . . .
H41A H 0.5090 0.8657 0.0619 0.148 Uiso 1 1 calc R U . . .
H41B H 0.5657 0.9821 0.0412 0.148 Uiso 1 1 calc R U . . .
H41C H 0.5910 0.8286 0.0355 0.148 Uiso 1 1 calc R U . . .
C42 C 0.5969(4) 0.8983(6) 0.1258(3) 0.0398(15) Uani 1 1 d . . . . .
C43 C 0.5436(6) 0.8617(10) 0.1742(4) 0.079(3) Uani 1 1 d . . . . .
H43A H 0.4936 0.8402 0.1539 0.094 Uiso 1 1 calc R U . . .
H43B H 0.5633 0.7834 0.1976 0.094 Uiso 1 1 calc R U . . .
H43C H 0.5380 0.9369 0.2035 0.094 Uiso 1 1 calc R U . . .
C44 C 0.4225(5) 0.3325(9) 0.3737(5) 0.072(2) Uani 1 1 d . . . . .
H44A H 0.4436 0.3649 0.3337 0.087 Uiso 1 1 calc R U . . .
H44B H 0.4289 0.2340 0.3752 0.087 Uiso 1 1 calc R U . . .
H9 H -0.025(5) 0.187(5) 0.183(3) 0.09(3) Uiso 1 1 d D . . . .
H7 H 0.093(4) 0.549(8) 0.194(3) 0.09(3) Uiso 1 1 d D . . . .
H29 H 0.551(3) 0.205(5) 0.263(3) 0.037(17) Uiso 1 1 d D . . . .
H27 H 0.530(4) 0.541(8) 0.1819(19) 0.07(2) Uiso 1 1 d D . . . .

loop_
 _atom_site_aniso_label
 _atom_site_aniso_U_11
 _atom_site_aniso_U_22
 _atom_site_aniso_U_33
 _atom_site_aniso_U_23
 _atom_site_aniso_U_13
 _atom_site_aniso_U_12
Cl1 0.0633(15) 0.104(2) 0.129(2) -0.0210(18) -0.0100(14) -0.0108(14)
Cl2 0.0517(10) 0.0616(12) 0.0546(11) -0.0029(9) 0.0043(8) 0.0006(9)
S1 0.0220(7) 0.0478(9) 0.0321(8) 0.0058(7) -0.0022(6) 0.0029(6)
S21 0.0320(8) 0.0412(9) 0.0296(8) 0.0069(7) -0.0037(6) -0.0078(7)
O3 0.032(2) 0.048(3) 0.038(2) 0.016(2) 0.0014(18) -0.0043(19)
O6 0.0209(18) 0.034(2) 0.033(2) 0.0074(17) -0.0030(16) -0.0029(16)
O7 0.0239(19) 0.035(2) 0.027(2) -0.0040(17) 0.0008(16) 0.0003(17)
O23 0.029(2) 0.042(2) 0.034(2) 0.0164(19) -0.0025(17) -0.0087(18)
O26 0.028(2) 0.035(2) 0.030(2) 0.0003(17) 0.0036(16) -0.0065(17)
O27 0.035(2) 0.025(2) 0.030(2) -0.0001(17) 0.0073(17) 0.0024(17)
O42 0.051(3) 0.052(3) 0.087(4) 0.019(3) -0.018(3) 0.003(3)
N9 0.023(2) 0.034(3) 0.026(2) 0.006(2) 0.0004(18) -0.001(2)
N29 0.024(2) 0.030(3) 0.025(2) 0.003(2) 0.0013(19) -0.0014(19)
C2 0.025(3) 0.039(3) 0.026(3) -0.001(3) 0.003(2) 0.004(2)
C3 0.031(3) 0.048(4) 0.026(3) 0.007(3) 0.004(2) 0.006(3)
C4 0.037(3) 0.053(4) 0.029(3) 0.013(3) 0.004(3) 0.009(3)
C5 0.035(3) 0.057(4) 0.029(3) 0.008(3) -0.002(3) 0.010(3)
C7 0.022(3) 0.030(3) 0.022(3) 0.000(2) 0.000(2) 0.000(2)
C8 0.023(3) 0.031(3) 0.021(3) -0.002(2) 0.005(2) 0.002(2)
C10 0.020(3) 0.033(3) 0.033(3) 0.006(2) -0.001(2) 0.000(2)
C11 0.023(3) 0.037(3) 0.030(3) 0.006(3) -0.004(2) -0.003(2)
C12 0.019(3) 0.047(4) 0.021(3) 0.000(3) -0.002(2) -0.001(2)
C13 0.025(3) 0.053(4) 0.029(3) 0.003(3) 0.002(2) -0.003(3)
C14 0.025(3) 0.093(6) 0.028(3) 0.004(4) 0.002(3) -0.012(3)
C15 0.030(3) 0.090(6) 0.025(3) -0.015(4) 0.002(3) 0.002(4)
C16 0.041(4) 0.069(5) 0.029(3) -0.012(3) -0.005(3) 0.005(3)
C17 0.028(3) 0.042(3) 0.029(3) -0.009(3) 0.002(2) -0.005(3)
C18 0.029(3) 0.045(4) 0.044(4) -0.001(3) -0.005(3) -0.003(3)
C19 0.024(3) 0.041(4) 0.037(3) 0.005(3) 0.001(2) 0.005(3)
C22 0.026(3) 0.030(3) 0.027(3) 0.004(2) 0.001(2) -0.003(2)
C23 0.029(3) 0.035(3) 0.031(3) 0.004(3) 0.002(2) -0.002(3)
C24 0.023(3) 0.039(3) 0.042(4) 0.009(3) -0.001(2) -0.005(2)
C25 0.026(3) 0.050(4) 0.036(3) 0.003(3) -0.004(3) -0.009(3)
C27 0.027(3) 0.019(3) 0.030(3) 0.003(2) 0.003(2) 0.000(2)
C28 0.028(3) 0.027(3) 0.032(3) 0.000(2) 0.002(2) 0.003(2)
C30 0.023(3) 0.034(3) 0.027(3) 0.003(2) 0.000(2) -0.005(2)
C31 0.028(3) 0.028(3) 0.032(3) -0.007(2) 0.000(2) -0.007(2)
C32 0.023(3) 0.023(3) 0.033(3) 0.003(2) 0.007(2) -0.004(2)
C33 0.028(3) 0.026(3) 0.030(3) 0.004(2) 0.004(2) -0.003(2)
C34 0.028(3) 0.036(3) 0.032(3) 0.003(3) 0.003(2) -0.003(2)
C35 0.036(3) 0.046(4) 0.037(4) -0.014(3) 0.003(3) 0.000(3)
C36 0.035(3) 0.044(4) 0.055(4) -0.012(3) 0.001(3) 0.012(3)
C37 0.036(3) 0.031(3) 0.037(3) -0.001(3) 0.000(3) 0.006(3)
C38 0.033(3) 0.033(3) 0.037(3) 0.002(3) 0.001(3) 0.001(3)
C39 0.035(3) 0.035(3) 0.032(3) -0.004(3) -0.005(2) -0.002(3)
C41 0.128(9) 0.204(14) 0.036(5) 0.026(7) -0.015(5) -0.105(10)
C42 0.048(4) 0.024(3) 0.047(4) 0.002(3) -0.002(3) 0.006(3)
C43 0.098(7) 0.088(7) 0.052(5) -0.014(5) 0.024(5) -0.005(6)
C44 0.084(6) 0.051(5) 0.081(6) 0.002(4) 0.000(5) 0.001(5)

#==============================================================================
_computing_data_collection
                                'CrystalClear-SM Expert 2.1 b45 (Rigaku, 2015)'
_computing_cell_refinement
                                               'CrystalClear-SM Expert 2.1 b45'
_computing_data_reduction
                                               'CrystalClear-SM Expert 2.1 b45'
_computing_structure_solution
                                                'SIR2011 (Burla, et al., 2012)'
_computing_structure_refinement
                                      'SHELXL Version 2014/7 (Sheldrick, 2008)'
_computing_publication_material
                                          'CrystalStructure 4.2 (Rigaku, 2015)'
_computing_molecular_graphics                     'CrystalStructure 4.2'

#==============================================================================
# MOLECULAR GEOMETRY

_geom_special_details
;
 All esds (except the esd in the dihedral angle between two l.s. planes)
 are estimated using the full covariance matrix.  The cell esds are taken
 into account individually in the estimation of esds in distances, angles
 and torsion angles; correlations between esds in cell parameters are only
 used when they are defined by crystal symmetry.  An approximate (isotropic)
 treatment of cell esds is used for estimating esds involving l.s. planes.
;

loop_
 _geom_bond_atom_site_label_1
 _geom_bond_atom_site_label_2
 _geom_bond_distance
 _geom_bond_site_symmetry_2
 _geom_bond_publ_flag
Cl1 C44 1.733(10) . ?
Cl2 C44 1.743(9) . ?
S1 C5 1.707(7) . ?
S1 C2 1.750(6) . ?
S21 C25 1.718(6) . ?
S21 C22 1.743(6) . ?
O3 C3 1.290(7) . ?
O6 C7 1.429(6) . ?
O6 C11 1.430(7) . ?
O7 C7 1.373(6) . ?
O7 H7 0.979(5) . ?
O23 C23 1.277(7) . ?
O26 C27 1.419(6) . ?
O26 C31 1.424(7) . ?
O27 C27 1.401(6) . ?
O27 H27 0.980(5) . ?
O42 C42 1.211(8) . ?
N9 C8 1.318(7) . ?
N9 C10 1.466(7) . ?
N9 H9 0.980(5) . ?
N29 C28 1.311(7) . ?
N29 C30 1.483(7) . ?
N29 H29 0.980(5) . ?
C2 C8 1.393(8) . ?
C2 C3 1.433(9) . ?
C3 C4 1.429(8) . ?
C4 C5 1.359(9) . ?
C4 H4 0.9500 . ?
C5 H5 0.9500 . ?
C7 C12 1.533(7) . ?
C7 C8 1.539(8) . ?
C10 C19 1.519(8) . ?
C10 C11 1.526(8) . ?
C10 C18 1.541(8) . ?
C11 H11A 0.9900 . ?
C11 H11B 0.9900 . ?
C12 C17 1.381(9) . ?
C12 C13 1.394(8) . ?
C13 C14 1.404(9) . ?
C13 H13 0.9500 . ?
C14 C15 1.357(11) . ?
C14 H14 0.9500 . ?
C15 C16 1.387(10) . ?
C15 H15 0.9500 . ?
C16 C17 1.377(9) . ?
C16 H16 0.9500 . ?
C17 H17 0.9500 . ?
C18 H18A 0.9800 . ?
C18 H18B 0.9800 . ?
C18 H18C 0.9800 . ?
C19 H19A 0.9800 . ?
C19 H19B 0.9800 . ?
C19 H19C 0.9800 . ?
C22 C28 1.405(8) . ?
C22 C23 1.431(8) . ?
C23 C24 1.425(8) . ?
C24 C25 1.349(9) . ?
C24 H24 0.9500 . ?
C25 H25 0.9500 . ?
C27 C32 1.520(8) . ?
C27 C28 1.544(8) . ?
C30 C31 1.502(8) . ?
C30 C38 1.505(8) . ?
C30 C39 1.513(8) . ?
C31 H31A 0.9900 . ?
C31 H31B 0.9900 . ?
C32 C33 1.383(8) . ?
C32 C37 1.390(8) . ?
C33 C34 1.388(8) . ?
C33 H33 0.9500 . ?
C34 C35 1.377(9) . ?
C34 H34 0.9500 . ?
C35 C36 1.378(10) . ?
C35 H35 0.9500 . ?
C36 C37 1.376(9) . ?
C36 H36 0.9500 . ?
C37 H37 0.9500 . ?
C38 H38A 0.9800 . ?
C38 H38B 0.9800 . ?
C38 H38C 0.9800 . ?
C39 H39A 0.9800 . ?
C39 H39B 0.9800 . ?
C39 H39C 0.9800 . ?
C41 C42 1.478(11) . ?
C41 H41A 0.9800 . ?
C41 H41B 0.9800 . ?
C41 H41C 0.9800 . ?
C42 C43 1.456(11) . ?
C43 H43A 0.9800 . ?
C43 H43B 0.9800 . ?
C43 H43C 0.9800 . ?
C44 H44A 0.9900 . ?
C44 H44B 0.9900 . ?

loop_
 _geom_angle_atom_site_label_1
 _geom_angle_atom_site_label_2
 _geom_angle_atom_site_label_3
 _geom_angle
 _geom_angle_site_symmetry_1
 _geom_angle_site_symmetry_3
 _geom_angle_publ_flag
C5 S1 C2 90.4(3) . . ?
C25 S21 C22 90.9(3) . . ?
C7 O6 C11 113.8(4) . . ?
C7 O7 H7 109(5) . . ?
C27 O26 C31 112.8(4) . . ?
C27 O27 H27 113(5) . . ?
C8 N9 C10 127.0(5) . . ?
C8 N9 H9 105(5) . . ?
C10 N9 H9 128(5) . . ?
C28 N29 C30 126.3(5) . . ?
C28 N29 H29 110(4) . . ?
C30 N29 H29 123(4) . . ?
C8 C2 C3 124.2(5) . . ?
C8 C2 S1 124.4(4) . . ?
C3 C2 S1 111.4(4) . . ?
O3 C3 C4 125.7(6) . . ?
O3 C3 C2 123.5(5) . . ?
C4 C3 C2 110.8(5) . . ?
C5 C4 C3 112.2(6) . . ?
C5 C4 H4 123.9 . . ?
C3 C4 H4 123.9 . . ?
C4 C5 S1 115.1(5) . . ?
C4 C5 H5 122.4 . . ?
S1 C5 H5 122.4 . . ?
O7 C7 O6 106.3(4) . . ?
O7 C7 C12 108.7(4) . . ?
O6 C7 C12 109.4(4) . . ?
O7 C7 C8 110.5(4) . . ?
O6 C7 C8 109.8(4) . . ?
C12 C7 C8 111.9(5) . . ?
N9 C8 C2 119.0(5) . . ?
N9 C8 C7 119.2(5) . . ?
C2 C8 C7 121.9(5) . . ?
N9 C10 C19 109.2(5) . . ?
N9 C10 C11 106.9(4) . . ?
C19 C10 C11 110.6(5) . . ?
N9 C10 C18 108.6(5) . . ?
C19 C10 C18 111.2(5) . . ?
C11 C10 C18 110.2(5) . . ?
O6 C11 C10 109.4(4) . . ?
O6 C11 H11A 109.8 . . ?
C10 C11 H11A 109.8 . . ?
O6 C11 H11B 109.8 . . ?
C10 C11 H11B 109.8 . . ?
H11A C11 H11B 108.2 . . ?
C17 C12 C13 119.9(5) . . ?
C17 C12 C7 122.7(5) . . ?
C13 C12 C7 117.2(5) . . ?
C12 C13 C14 118.2(6) . . ?
C12 C13 H13 120.9 . . ?
C14 C13 H13 120.9 . . ?
C15 C14 C13 121.2(6) . . ?
C15 C14 H14 119.4 . . ?
C13 C14 H14 119.4 . . ?
C14 C15 C16 120.4(6) . . ?
C14 C15 H15 119.8 . . ?
C16 C15 H15 119.8 . . ?
C17 C16 C15 119.3(7) . . ?
C17 C16 H16 120.3 . . ?
C15 C16 H16 120.3 . . ?
C16 C17 C12 120.9(6) . . ?
C16 C17 H17 119.5 . . ?
C12 C17 H17 119.5 . . ?
C10 C18 H18A 109.5 . . ?
C10 C18 H18B 109.5 . . ?
H18A C18 H18B 109.5 . . ?
C10 C18 H18C 109.5 . . ?
H18A C18 H18C 109.5 . . ?
H18B C18 H18C 109.5 . . ?
C10 C19 H19A 109.5 . . ?
C10 C19 H19B 109.5 . . ?
H19A C19 H19B 109.5 . . ?
C10 C19 H19C 109.5 . . ?
H19A C19 H19C 109.5 . . ?
H19B C19 H19C 109.5 . . ?
C28 C22 C23 123.3(5) . . ?
C28 C22 S21 125.6(4) . . ?
C23 C22 S21 111.0(4) . . ?
O23 C23 C24 126.7(5) . . ?
O23 C23 C22 122.4(5) . . ?
C24 C23 C22 111.0(5) . . ?
C25 C24 C23 113.1(5) . . ?
C25 C24 H24 123.5 . . ?
C23 C24 H24 123.5 . . ?
C24 C25 S21 114.1(4) . . ?
C24 C25 H25 123.0 . . ?
S21 C25 H25 123.0 . . ?
O27 C27 O26 112.0(4) . . ?
O27 C27 C32 110.3(4) . . ?
O26 C27 C32 104.0(4) . . ?
O27 C27 C28 108.0(4) . . ?
O26 C27 C28 110.6(4) . . ?
C32 C27 C28 112.0(4) . . ?
N29 C28 C22 118.2(5) . . ?
N29 C28 C27 118.8(5) . . ?
C22 C28 C27 122.9(5) . . ?
N29 C30 C31 107.4(4) . . ?
N29 C30 C38 108.8(5) . . ?
C31 C30 C38 111.5(5) . . ?
N29 C30 C39 107.3(4) . . ?
C31 C30 C39 110.2(5) . . ?
C38 C30 C39 111.5(5) . . ?
O26 C31 C30 110.4(4) . . ?
O26 C31 H31A 109.6 . . ?
C30 C31 H31A 109.6 . . ?
O26 C31 H31B 109.6 . . ?
C30 C31 H31B 109.6 . . ?
H31A C31 H31B 108.1 . . ?
C33 C32 C37 119.5(5) . . ?
C33 C32 C27 121.3(5) . . ?
C37 C32 C27 119.2(5) . . ?
C32 C33 C34 119.9(5) . . ?
C32 C33 H33 120.1 . . ?
C34 C33 H33 120.1 . . ?
C35 C34 C33 120.4(6) . . ?
C35 C34 H34 119.8 . . ?
C33 C34 H34 119.8 . . ?
C34 C35 C36 119.5(6) . . ?
C34 C35 H35 120.3 . . ?
C36 C35 H35 120.3 . . ?
C35 C36 C37 120.7(6) . . ?
C35 C36 H36 119.6 . . ?
C37 C36 H36 119.6 . . ?
C36 C37 C32 120.0(6) . . ?
C36 C37 H37 120.0 . . ?
C32 C37 H37 120.0 . . ?
C30 C38 H38A 109.5 . . ?
C30 C38 H38B 109.5 . . ?
H38A C38 H38B 109.5 . . ?
C30 C38 H38C 109.5 . . ?
H38A C38 H38C 109.5 . . ?
H38B C38 H38C 109.5 . . ?
C30 C39 H39A 109.5 . . ?
C30 C39 H39B 109.5 . . ?
H39A C39 H39B 109.5 . . ?
C30 C39 H39C 109.5 . . ?
H39A C39 H39C 109.5 . . ?
H39B C39 H39C 109.5 . . ?
C42 C41 H41A 109.5 . . ?
C42 C41 H41B 109.5 . . ?
H41A C41 H41B 109.5 . . ?
C42 C41 H41C 109.5 . . ?
H41A C41 H41C 109.5 . . ?
H41B C41 H41C 109.5 . . ?
O42 C42 C43 123.8(7) . . ?
O42 C42 C41 122.7(7) . . ?
C43 C42 C41 113.5(7) . . ?
C42 C43 H43A 109.5 . . ?
C42 C43 H43B 109.5 . . ?
H43A C43 H43B 109.5 . . ?
C42 C43 H43C 109.5 . . ?
H43A C43 H43C 109.5 . . ?
H43B C43 H43C 109.5 . . ?
Cl1 C44 Cl2 113.3(5) . . ?
Cl1 C44 H44A 108.9 . . ?
Cl2 C44 H44A 108.9 . . ?
Cl1 C44 H44B 108.9 . . ?
Cl2 C44 H44B 108.9 . . ?
H44A C44 H44B 107.7 . . ?

loop_
 _geom_torsion_atom_site_label_1
 _geom_torsion_atom_site_label_2
 _geom_torsion_atom_site_label_3
 _geom_torsion_atom_site_label_4
 _geom_torsion
 _geom_torsion_site_symmetry_1
 _geom_torsion_site_symmetry_2
 _geom_torsion_site_symmetry_3
 _geom_torsion_site_symmetry_4
 _geom_torsion_publ_flag
C5 S1 C2 C8 -176.5(5) . . . . ?
C5 S1 C2 C3 1.6(5) . . . . ?
C8 C2 C3 O3 -3.4(10) . . . . ?
S1 C2 C3 O3 178.5(5) . . . . ?
C8 C2 C3 C4 176.6(6) . . . . ?
S1 C2 C3 C4 -1.5(7) . . . . ?
O3 C3 C4 C5 -179.5(6) . . . . ?
C2 C3 C4 C5 0.5(8) . . . . ?
C3 C4 C5 S1 0.7(8) . . . . ?
C2 S1 C5 C4 -1.3(5) . . . . ?
C11 O6 C7 O7 -168.0(4) . . . . ?
C11 O6 C7 C12 74.9(5) . . . . ?
C11 O6 C7 C8 -48.4(6) . . . . ?
C10 N9 C8 C2 176.4(5) . . . . ?
C10 N9 C8 C7 -4.7(8) . . . . ?
C3 C2 C8 N9 2.2(9) . . . . ?
S1 C2 C8 N9 -179.9(4) . . . . ?
C3 C2 C8 C7 -176.7(5) . . . . ?
S1 C2 C8 C7 1.2(8) . . . . ?
O7 C7 C8 N9 132.8(5) . . . . ?
O6 C7 C8 N9 15.8(7) . . . . ?
C12 C7 C8 N9 -105.9(5) . . . . ?
O7 C7 C8 C2 -48.3(7) . . . . ?
O6 C7 C8 C2 -165.3(5) . . . . ?
C12 C7 C8 C2 73.0(6) . . . . ?
C8 N9 C10 C19 -98.0(6) . . . . ?
C8 N9 C10 C11 21.7(8) . . . . ?
C8 N9 C10 C18 140.5(6) . . . . ?
C7 O6 C11 C10 69.0(6) . . . . ?
N9 C10 C11 O6 -50.5(6) . . . . ?
C19 C10 C11 O6 68.2(6) . . . . ?
C18 C10 C11 O6 -168.4(5) . . . . ?
O7 C7 C12 C17 143.8(5) . . . . ?
O6 C7 C12 C17 -100.5(6) . . . . ?
C8 C7 C12 C17 21.4(7) . . . . ?
O7 C7 C12 C13 -41.0(6) . . . . ?
O6 C7 C12 C13 74.7(6) . . . . ?
C8 C7 C12 C13 -163.3(5) . . . . ?
C17 C12 C13 C14 0.6(8) . . . . ?
C7 C12 C13 C14 -174.7(5) . . . . ?
C12 C13 C14 C15 0.2(9) . . . . ?
C13 C14 C15 C16 -1.5(10) . . . . ?
C14 C15 C16 C17 1.9(10) . . . . ?
C15 C16 C17 C12 -1.0(9) . . . . ?
C13 C12 C17 C16 -0.3(9) . . . . ?
C7 C12 C17 C16 174.8(5) . . . . ?
C25 S21 C22 C28 -176.6(5) . . . . ?
C25 S21 C22 C23 0.1(5) . . . . ?
C28 C22 C23 O23 -2.0(9) . . . . ?
S21 C22 C23 O23 -178.9(5) . . . . ?
C28 C22 C23 C24 176.7(5) . . . . ?
S21 C22 C23 C24 -0.2(6) . . . . ?
O23 C23 C24 C25 178.8(6) . . . . ?
C22 C23 C24 C25 0.1(8) . . . . ?
C23 C24 C25 S21 0.0(8) . . . . ?
C22 S21 C25 C24 -0.1(5) . . . . ?
C31 O26 C27 O27 72.3(5) . . . . ?
C31 O26 C27 C32 -168.7(4) . . . . ?
C31 O26 C27 C28 -48.2(6) . . . . ?
C30 N29 C28 C22 -175.2(5) . . . . ?
C30 N29 C28 C27 1.3(8) . . . . ?
C23 C22 C28 N29 0.7(9) . . . . ?
S21 C22 C28 N29 177.1(4) . . . . ?
C23 C22 C28 C27 -175.6(5) . . . . ?
S21 C22 C28 C27 0.8(8) . . . . ?
O27 C27 C28 N29 -109.5(5) . . . . ?
O26 C27 C28 N29 13.3(7) . . . . ?
C32 C27 C28 N29 128.9(5) . . . . ?
O27 C27 C28 C22 66.8(7) . . . . ?
O26 C27 C28 C22 -170.4(5) . . . . ?
C32 C27 C28 C22 -54.8(7) . . . . ?
C28 N29 C30 C31 16.3(7) . . . . ?
C28 N29 C30 C38 -104.5(6) . . . . ?
C28 N29 C30 C39 134.8(6) . . . . ?
C27 O26 C31 C30 69.6(6) . . . . ?
N29 C30 C31 O26 -49.2(6) . . . . ?
C38 C30 C31 O26 69.9(6) . . . . ?
C39 C30 C31 O26 -165.7(4) . . . . ?
O27 C27 C32 C33 3.0(7) . . . . ?
O26 C27 C32 C33 -117.3(5) . . . . ?
C28 C27 C32 C33 123.2(5) . . . . ?
O27 C27 C32 C37 -179.3(5) . . . . ?
O26 C27 C32 C37 60.5(6) . . . . ?
C28 C27 C32 C37 -59.0(7) . . . . ?
C37 C32 C33 C34 1.0(8) . . . . ?
C27 C32 C33 C34 178.8(5) . . . . ?
C32 C33 C34 C35 -1.4(8) . . . . ?
C33 C34 C35 C36 0.5(9) . . . . ?
C34 C35 C36 C37 0.8(10) . . . . ?
C35 C36 C37 C32 -1.2(10) . . . . ?
C33 C32 C37 C36 0.3(9) . . . . ?
C27 C32 C37 C36 -177.5(6) . . . . ?

#==============================================================================
loop_
_geom_hbond_atom_site_label_D
_geom_hbond_atom_site_label_H
_geom_hbond_atom_site_label_A
_geom_hbond_site_symmetry_D
_geom_hbond_site_symmetry_H
_geom_hbond_site_symmetry_A
_geom_hbond_distance_DA
_geom_hbond_distance_DH
_geom_hbond_distance_HA
_geom_hbond_angle_DHA
_geom_hbond_publ_flag
O7 H7 O23 . . 2_555 2.592(6) 0.98(7) 1.61(7) 177(7) no
O27 H27 O3 . . 2_555 2.694(6) 0.98(5) 1.72(5) 173(6) no
N9 H9 O3 . . . 2.649(6) 0.98(6) 1.74(7) 153(7) no
N29 H29 O23 . . . 2.584(6) 0.98(5) 1.70(5) 147(5) no

#==============================================================================
# Additional structures and associated data_? identifiers
# should be added at this point if there is more than one 
# structure analysis in the CIF.

_shelx_res_file
;

    shelxl.res created by SHELXL-2014/7

TITL AHAA18
CELL  0.71075 17.45200 9.98400 21.10500 90.00000 92.37600 90.00000
ZERR  4 0.00000 0.00000 0.00000 0.00000 0.00000 0.00000
LATT 1
SYMM .50-X, .50+Y, .50-Z
SFAC C H N O S CL
UNIT 144 168 8 28 8 8
L.S. 20
FMAP 2
PLAN 5
WPDB -2
HTAB
BOND $H
CONF
LIST 4
TEMP -180.0
ACTA
SIZE 0.100 0.100 0.100
DFIX 0.9800 0.0050 O7 H7 O27 H27 N9 H9 N29 H29
WGHT    0.127900   14.309800
FVAR       0.06245
CL1   6    0.325568    0.370058    0.373390    11.00000    0.06329    0.10376 =
         0.12931   -0.02099   -0.00999   -0.01080
CL2   6    0.474874    0.403306    0.437408    11.00000    0.05170    0.06164 =
         0.05460   -0.00291    0.00428    0.00055
S1    5    0.195481    0.265249    0.231336    11.00000    0.02198    0.04784 =
         0.03214    0.00584   -0.00222    0.00292
S21   5    0.435053    0.275757    0.094213    11.00000    0.03201    0.04122 =
         0.02959    0.00688   -0.00369   -0.00780
O3    4    0.001877    0.078060    0.244119    11.00000    0.03243    0.04774 =
         0.03778    0.01600    0.00144   -0.00427
O6    4    0.027010    0.491108    0.097572    11.00000    0.02090    0.03415 =
         0.03291    0.00737   -0.00302   -0.00293
O7    4    0.128235    0.503717    0.166297    11.00000    0.02390    0.03455 =
         0.02695   -0.00401    0.00083    0.00031
O23   4    0.466982    0.117325    0.259487    11.00000    0.02883    0.04173 =
         0.03418    0.01637   -0.00246   -0.00865
O26   4    0.673219    0.426011    0.171649    11.00000    0.02770    0.03498 =
         0.02964    0.00026    0.00356   -0.00654
O27   4    0.554377    0.519963    0.142157    11.00000    0.03522    0.02480 =
         0.03042   -0.00015    0.00734    0.00238
O42   4    0.663056    0.929705    0.137370    11.00000    0.05051    0.05172 =
         0.08682    0.01862   -0.01827    0.00272
N9    3   -0.018194    0.267780    0.157282    11.00000    0.02277    0.03392 =
         0.02572    0.00553    0.00044   -0.00113
N29   3    0.584285    0.268785    0.242089    11.00000    0.02443    0.02975 =
         0.02507    0.00345    0.00132   -0.00143
C2    1    0.098747    0.232008    0.212581    11.00000    0.02461    0.03949 =
         0.02626   -0.00109    0.00269    0.00359
C3    1    0.071628    0.120871    0.248283    11.00000    0.03102    0.04845 =
         0.02576    0.00653    0.00429    0.00585
C4    1    0.131946    0.066064    0.288151    11.00000    0.03720    0.05256 =
         0.02939    0.01295    0.00360    0.00931
AFIX  43
H4    2    0.125790   -0.008643    0.315351    11.00000   -1.20000
AFIX   0
C5    1    0.199123    0.133090    0.282687    11.00000    0.03488    0.05710 =
         0.02920    0.00789   -0.00229    0.01034
AFIX  43
H5    2    0.244803    0.108197    0.305774    11.00000   -1.20000
AFIX   0
C7    1    0.087762    0.415673    0.127803    11.00000    0.02233    0.02987 =
         0.02212    0.00024    0.00010   -0.00039
C8    1    0.054273    0.301816    0.167257    11.00000    0.02271    0.03146 =
         0.02055   -0.00210    0.00507    0.00172
C10   1   -0.074865    0.333447    0.114489    11.00000    0.01977    0.03346 =
         0.03265    0.00627   -0.00083    0.00041
C11   1   -0.030135    0.410269    0.065637    11.00000    0.02323    0.03682 =
         0.03010    0.00552   -0.00427   -0.00283
AFIX  23
H11A  2   -0.005444    0.346533    0.036901    11.00000   -1.20000
H11B  2   -0.065511    0.467804    0.039820    11.00000   -1.20000
AFIX   0
C12   1    0.140879    0.362568    0.077458    11.00000    0.01931    0.04736 =
         0.02096   -0.00047   -0.00153   -0.00137
C13   1    0.190131    0.454390    0.050473    11.00000    0.02495    0.05266 =
         0.02881    0.00250    0.00248   -0.00320
AFIX  43
H13   2    0.193464    0.543995    0.065479    11.00000   -1.20000
AFIX   0
C14   1    0.234662    0.410917    0.000544    11.00000    0.02493    0.09341 =
         0.02759    0.00366    0.00157   -0.01234
AFIX  43
H14   2    0.268688    0.471989   -0.018319    11.00000   -1.20000
AFIX   0
C15   1    0.229958    0.283233   -0.021241    11.00000    0.02982    0.09034 =
         0.02516   -0.01497    0.00170    0.00150
AFIX  43
H15   2    0.259685    0.256466   -0.055755    11.00000   -1.20000
AFIX   0
C16   1    0.182017    0.191528    0.006565    11.00000    0.04062    0.06862 =
         0.02898   -0.01231   -0.00509    0.00517
AFIX  43
H16   2    0.179918    0.101438   -0.007890    11.00000   -1.20000
AFIX   0
C17   1    0.137490    0.232388    0.055336    11.00000    0.02829    0.04183 =
         0.02858   -0.00930    0.00195   -0.00506
AFIX  43
H17   2    0.103975    0.170194    0.074031    11.00000   -1.20000
AFIX   0
C18   1   -0.124959    0.224867    0.081493    11.00000    0.02930    0.04463 =
         0.04448   -0.00147   -0.00515   -0.00319
AFIX  33
H18A  2   -0.163142    0.267463    0.052709    11.00000   -1.20000
H18B  2   -0.092485    0.165267    0.057281    11.00000   -1.20000
H18C  2   -0.151111    0.172808    0.113503    11.00000   -1.20000
AFIX   0
C19   1   -0.123064    0.428662    0.152415    11.00000    0.02448    0.04114 =
         0.03684    0.00486    0.00147    0.00475
AFIX  33
H19A  2   -0.161026    0.472763    0.123962    11.00000   -1.20000
H19B  2   -0.149463    0.378253    0.184853    11.00000   -1.20000
H19C  2   -0.089795    0.496393    0.172895    11.00000   -1.20000
AFIX   0
C22   1    0.484983    0.242758    0.165732    11.00000    0.02633    0.03023 =
         0.02692    0.00445    0.00063   -0.00343
C23   1    0.442452    0.154272    0.204369    11.00000    0.02892    0.03529 =
         0.03143    0.00378    0.00185   -0.00160
C24   1    0.371213    0.118472    0.173486    11.00000    0.02290    0.03898 =
         0.04164    0.00889   -0.00083   -0.00535
AFIX  43
H24   2    0.334932    0.060544    0.191650    11.00000   -1.20000
AFIX   0
C25   1    0.360609    0.175308    0.115809    11.00000    0.02627    0.04952 =
         0.03608    0.00286   -0.00355   -0.00898
AFIX  43
H25   2    0.315903    0.161040    0.089451    11.00000   -1.20000
AFIX   0
C27   1    0.598290    0.402538    0.145330    11.00000    0.02746    0.01882 =
         0.03043    0.00328    0.00343   -0.00006
C28   1    0.555632    0.299563    0.185530    11.00000    0.02756    0.02710 =
         0.03168   -0.00050    0.00182    0.00271
C30   1    0.654700    0.325633    0.273342    11.00000    0.02305    0.03400 =
         0.02717    0.00273    0.00005   -0.00540
C31   1    0.674115    0.450957    0.238087    11.00000    0.02809    0.02768 =
         0.03191   -0.00655    0.00005   -0.00701
AFIX  23
H31A  2    0.636454    0.521864    0.247141    11.00000   -1.20000
H31B  2    0.725585    0.482890    0.252652    11.00000   -1.20000
AFIX   0
C32   1    0.611685    0.350560    0.079011    11.00000    0.02331    0.02340 =
         0.03302    0.00276    0.00720   -0.00441
C33   1    0.585348    0.419825    0.025693    11.00000    0.02799    0.02622 =
         0.03006    0.00446    0.00411   -0.00295
AFIX  43
H33   2    0.557409    0.500733    0.030060    11.00000   -1.20000
AFIX   0
C34   1    0.599799    0.370948   -0.034186    11.00000    0.02765    0.03597 =
         0.03167    0.00298    0.00261   -0.00267
AFIX  43
H34   2    0.580682    0.417587   -0.070757    11.00000   -1.20000
AFIX   0
C35   1    0.641657    0.255314   -0.040960    11.00000    0.03554    0.04604 =
         0.03689   -0.01359    0.00344   -0.00005
AFIX  43
H35   2    0.651822    0.222472   -0.082015    11.00000   -1.20000
AFIX   0
C36   1    0.668677    0.187628    0.012281    11.00000    0.03550    0.04394 =
         0.05460   -0.01237    0.00124    0.01200
AFIX  43
H36   2    0.698120    0.108429    0.007748    11.00000   -1.20000
AFIX   0
C37   1    0.653497    0.233453    0.071945    11.00000    0.03638    0.03086 =
         0.03737   -0.00066    0.00036    0.00640
AFIX  43
H37   2    0.671601    0.185033    0.108312    11.00000   -1.20000
AFIX   0
C38   1    0.718004    0.223633    0.271046    11.00000    0.03311    0.03318 =
         0.03691    0.00221    0.00064    0.00083
AFIX  33
H38A  2    0.764840    0.260242    0.291595    11.00000   -1.20000
H38B  2    0.702898    0.142238    0.293282    11.00000   -1.20000
H38C  2    0.727500    0.201991    0.226764    11.00000   -1.20000
AFIX   0
C39   1    0.636055    0.358961    0.340899    11.00000    0.03513    0.03546 =
         0.03160   -0.00352   -0.00455   -0.00166
AFIX  33
H39A  2    0.681497    0.396915    0.363053    11.00000   -1.20000
H39B  2    0.594135    0.424286    0.340760    11.00000   -1.20000
H39C  2    0.620452    0.277277    0.362652    11.00000   -1.20000
AFIX   0
C41   1    0.562791    0.893257    0.060610    11.00000    0.12833    0.20366 =
         0.03628    0.02592   -0.01490   -0.10525
AFIX  33
H41A  2    0.508989    0.865667    0.061908    11.00000   -1.20000
H41B  2    0.565745    0.982133    0.041153    11.00000   -1.20000
H41C  2    0.590995    0.828641    0.035524    11.00000   -1.20000
AFIX   0
C42   1    0.596937    0.898282    0.125825    11.00000    0.04820    0.02414 =
         0.04684    0.00210   -0.00167    0.00638
C43   1    0.543594    0.861703    0.174158    11.00000    0.09767    0.08839 =
         0.05151   -0.01359    0.02447   -0.00453
AFIX  33
H43A  2    0.493565    0.840172    0.153897    11.00000   -1.20000
H43B  2    0.563294    0.783437    0.197646    11.00000   -1.20000
H43C  2    0.538013    0.936876    0.203467    11.00000   -1.20000
AFIX   0
C44   1    0.422519    0.332530    0.373744    11.00000    0.08441    0.05131 =
         0.08145    0.00183    0.00018    0.00134
AFIX  23
H44A  2    0.443646    0.364860    0.333703    11.00000   -1.20000
H44B  2    0.428929    0.234039    0.375190    11.00000   -1.20000
AFIX   0
H9    2   -0.025067    0.187247    0.182938    11.00000    0.09033
H7    2    0.093142    0.548880    0.194339    11.00000    0.08923
H29   2    0.550886    0.204703    0.262764    11.00000    0.03673
H27   2    0.529822    0.540813    0.181875    11.00000    0.06649
HKLF 4

REM  AHAA18
REM R1 =  0.0929 for    4473 Fo > 4sig(Fo)  and  0.1329 for all    6666 data
REM    458 parameters refined using      4 restraints

END

WGHT      0.1269     14.4005

REM Instructions for potential hydrogen bonds
EQIV $1 -x+1/2, y-1/2, -z+1/2
HTAB C5 O7_$1
EQIV $2 x-1/2, -y+1/2, z-1/2
HTAB C18 Cl2_$2
EQIV $3 -x+1/2, y+1/2, -z+1/2
HTAB C31 O3_$3
EQIV $4 -x+3/2, y-1/2, -z+1/2
HTAB C38 O42_$4
HTAB C39 Cl2
EQIV $5 -x+1, -y+1, -z
HTAB C41 S21_$5
EQIV $6 x, y+1, z
HTAB C43 O23_$6
HTAB C44 O6_$1
HTAB C44 O7_$1
HTAB N9 O3
HTAB O7 O23_$3
HTAB N29 O23
HTAB O27 O3_$3

REM Highest difference peak  2.385,  deepest hole -1.013,  1-sigma level  0.108
Q1    1   0.3133  0.3192  0.4285  11.00000  0.05    2.38
Q2    1   0.3961  0.4004  0.3210  11.00000  0.05    2.21
Q3    1   0.3814  0.3946  0.4052  11.00000  0.05    0.88
Q4    1   0.3494  0.4245  0.4489  11.00000  0.05    0.69
Q5    1   0.4596  0.2827  0.1341  11.00000  0.05    0.47
;

_shelx_res_checksum   79713

_shelx_hkl_file
;
  -1  -1   0    2.01    0.69
  -1  -1   1    7.99    0.69
  -1  -1   1    5.95    0.49
  -1  -1  -1    2.93    0.95
   1  -1   1    3.08    0.65
   0  -1  -2   95.69    2.90
   0  -1   2   94.24    2.79
   0  -1   2   92.12    2.46
   0   1   2   94.50    2.76
   0   1   2   97.02    2.74
   0   0   3    0.13    0.65
   0   0   3   -0.26    0.78
   0   0   3   -0.13    0.69
  -2   0   2   63.54    2.04
  -1  -1   2    0.06    0.22
  -1  -1   2    0.09    0.43
   1  -1  -2   -0.11    0.46
  -1   1   2    0.11    0.48
   1  -1  -2   -0.13    0.57
  -1  -1   2   -0.85    0.74
  -1   1   2    0.27    0.29
  -1  -1   2    0.03    0.40
   1   1   2    2.49    0.36
  -1  -1  -2    2.47    0.36
   1  -1   2    2.19    0.88
   1  -1   2    2.46    0.53
  -1  -1  -2    2.04    0.70
   1  -1   2    2.96    0.77
   1   1   2    2.39    0.26
   1   1   2    2.14    0.51
  -1   0   3    0.21    1.03
  -1   0   3    0.73    0.49
  -1   0   3    0.84    0.38
  -1   0   3    0.43    1.20
   2   0   2  175.43    4.77
  -2   0  -2  164.91    4.54
  -2   0  -2  158.39    4.35
   2   0   2  161.92    4.47
   2  -1   0   51.00    1.72
  -2  -1   0   50.07    1.73
  -2  -1   0   49.63    1.60
  -2   1   0   51.32    1.68
   2  -1   0   48.23    1.62
   2   1   0   49.01    1.61
   2  -1   0   52.80    1.75
  -2  -1   0   48.49    1.60
   1   0   3    0.87    0.26
   1   0   3    1.77    0.76
   1   0   3    0.82    0.76
  -1   0  -3    0.29    0.56
   1   0   3    0.67    0.65
   2  -1  -1   15.43    0.86
  -2   1   1   18.49    1.03
   2  -1  -1   16.67    1.04
  -2  -1   1   17.82    0.93
   2   1  -1   17.17    0.96
  -2  -1   1   16.28    0.94
   2  -1  -1   17.40    0.99
  -2  -1   1   16.09    0.94
  -2   1   1   15.83    1.00
   2  -1  -1   13.96    1.15
  -2  -1  -1    3.43    0.53
  -2   1  -1    3.35    0.57
   2  -1   1    3.48    0.38
  -2  -1  -1    2.41    0.62
  -2  -1  -1    3.24    0.52
   2  -1   1    3.56    0.65
   2  -1   1    2.82    0.47
  -2  -1  -1    3.11    0.24
   2  -1   1    3.87    1.12
   2   1   1    3.37    0.48
  -2   1  -1    3.27    0.38
   3   0   0    0.70    0.57
   3   0   0    0.31    0.30
  -3   0   0   -0.01    0.25
   3   0   0    0.12    0.45
   0  -1  -3    3.93    0.58
   0  -1   3    6.38    0.65
   0   1   3    5.03    0.54
   0  -1   3    3.70    0.45
   0  -1  -3    5.29    0.60
   0   1   3    4.31    0.63
   0  -1   3    5.04    0.66
   0  -1   3    5.61    1.07
   0  -1  -3    4.82    0.73
   0   1   3    4.19    0.72
   3   0  -1    3.21    0.37
   3   0  -1    3.53    0.34
   3   0  -1    3.64    0.65
   3   0  -1    3.25    0.63
  -3   0   1    3.66    0.63
  -3   0   1    3.86    0.66
  -2   1   2   88.78    2.62
   2   1  -2   82.37    2.44
   2  -1  -2   90.40    2.63
   2   1  -2   85.20    2.31
  -2  -1   2   86.22    2.55
  -2  -1   2   83.86    2.29
  -2   1   2   87.59    2.64
  -2   1   2   90.98    2.61
  -2  -1   2   84.50    2.57
   2  -1  -2   84.47    2.45
   2  -1  -2   85.48    2.56
   2  -1  -2   86.74    2.62
  -2   0   3    0.95    0.66
   2   0  -3   -0.26    0.32
  -2   0   3   -0.15    0.56
   2   0  -3    0.28    0.61
  -2   0   3   -0.49    0.85
  -2   0   3   -0.06    0.34
   3   0   1    4.68    0.70
  -3   0  -1    3.96    0.45
   3   0   1    4.47    0.52
  -3   0  -1    5.18    0.76
   3   0   1    4.34    0.61
  -1  -1   3   -0.00    0.77
  -1  -1   3   -0.48    0.74
  -1  -1   3    0.18    0.42
   1  -1  -3    0.11    0.60
  -1   1   3    0.61    0.61
   1  -1  -3    0.08    0.28
  -1   1   3    0.20    0.50
   1  -1  -3    0.30    0.51
  -1   1   3    0.53    0.53
   1  -1  -3    0.46    0.49
  -1   1   3    0.16    0.23
  -1  -1   3    0.35    0.29
   1   1  -3    0.02    0.24
  -2  -1  -2    9.58    0.53
   2  -1   2   11.47    0.87
   2   1   2    9.87    0.76
  -2   1  -2    9.77    0.49
   2   1   2   10.24    0.53
  -2  -1  -2   10.37    0.59
   2  -1   2   12.81    1.18
   2  -1   2    9.54    0.54
   2  -1   2   10.11    0.59
  -2  -1  -2    9.58    0.84
   2   1   2   10.73    0.50
   1  -1   3    6.44    1.03
   1  -1   3    4.27    0.54
  -1  -1  -3    4.91    0.78
   1  -1   3    4.71    0.66
   1   1   3    5.02    0.46
   1   1   3    4.57    0.65
  -1  -1  -3    4.64    0.45
   1   1   3    5.16    0.79
  -1  -1  -3    4.25    0.71
   1  -1   3    4.31    0.49
   1   1   3    4.84    0.39
   2   0   3    1.42    0.86
   2   0   3    0.54    0.50
  -2   0  -3   -0.53    0.53
   2   0   3    0.18    0.58
   0   0  -4    4.40    0.68
   0   0   4    6.13    0.61
   0   0   4    5.94    0.89
   0   0   4    5.71    0.80
   3   0  -2    0.03    0.31
  -3   0   2    0.04    0.31
   3   0  -2    0.13    0.62
  -3   0   2   -0.18    0.62
  -3   0   2    0.78    0.65
  -1   0   4    0.10    0.57
  -1   0   4   -0.07    0.43
   1   0  -4   -0.06    0.38
  -1   0   4    0.06    0.35
  -1   0   4   -0.29    0.60
   3   1   0    1.80    0.53
  -3  -1   0    1.24    0.50
   3  -1   0    2.02    0.65
   3  -1   0    2.12    0.72
   3  -1   0    1.19    0.29
  -3  -1   0    1.02    0.41
  -3  -1   0    1.03    0.54
  -3   1   0    1.39    0.59
   3   1   0    1.55    0.49
   3  -1   0    1.50    0.71
  -3   0  -2    0.41    0.60
   3   0   2    0.06    0.60
  -3   0  -2    0.11    0.44
   3   0   2    0.28    0.49
   0   2   0  121.57    3.25
   0  -2   0  119.53    8.54
   0  -2   0  125.94    3.41
   1   0   4   -0.83    0.78
  -1   0  -4   -0.28    0.60
   1   0   4   -0.21    0.68
   3   1  -1    9.61    0.76
  -3  -1   1    9.61    0.77
   3  -1  -1    9.24    0.87
  -3   1   1    9.57    0.82
  -3  -1   1    9.76    0.62
  -3  -1   1    9.20    0.81
   3  -1  -1    9.07    0.86
   3  -1  -1    9.43    0.70
  -3   1   1    9.29    0.79
   2   1  -3   29.91    1.55
   2  -1  -3   34.41    1.00
  -2  -1   3   33.05    1.56
  -2   1   3   34.20    1.03
   2  -1  -3   33.17    1.63
   0  -2  -1   89.34    2.63
   0  -2   1   92.93    2.78
   0  -2  -1   93.84    2.64
   0  -2  -1   91.18    4.65
   0   2   1   96.78    2.66
   0  -2   1   89.53    2.46
   3  -1   1    3.99    0.51
   3   1   1    4.05    0.58
  -3  -1  -1    4.27    0.57
   3  -1   1    4.56    0.76
  -3  -1  -1    3.61    0.55
   3  -1   1    3.88    0.42
  -3   1  -1    4.05    0.36
  -3   1  -1    3.87    0.67
   3  -1   1    4.71    0.76
  -3  -1  -1    4.16    0.59
   3   1   1    3.84    0.58
  -1  -2   0   47.49    1.92
  -1  -2   0   52.29    1.54
   1  -2   0   49.28    1.63
   1  -2   0   47.96    2.32
  -1   2   0   49.29    1.44
   1  -2   0   53.43    1.61
   1   2   0   48.21    1.35
   1  -2   0   51.31    1.65
  -1  -2   0   48.78    1.40
   2   1   3    0.48    0.40
   2  -1   3    0.52    0.51
  -2  -1  -3    0.53    0.64
   2   1   3    0.29    0.16
   2  -1   3    1.39    0.74
  -2  -1  -3   -0.15    0.41
   2   1   3    0.27    0.60
   2   1   3    0.29    0.51
   2  -1   3    0.37    0.34
  -2   1  -3    0.40    0.25
   2  -1   3    0.03    0.63
   1   2  -1    0.50    0.66
  -1  -2   1    0.16    0.69
  -1  -2   1    0.05    0.21
  -1   2   1    0.29    0.24
   1  -2  -1   -0.17    0.51
   1  -2  -1    0.42    0.65
  -1  -2   1    0.19    0.28
  -1   2   1    0.22    0.42
   1  -2  -1   -0.10    0.55
   1  -2  -1    0.41    0.31
  -1  -2  -1   42.16    1.26
   1  -2   1   40.63    1.37
   1   2   1   40.76    1.18
   1  -2   1   43.11    1.39
   0  -1   4    0.66    0.66
   0  -1   4   -0.14    0.64
   0  -1  -4    0.50    0.52
   0   1   4    0.35    0.56
   0  -1  -4    1.01    0.69
   0   1   4    0.63    0.62
   0   1   4    0.27    0.46
   0  -1   4   -0.04    0.28
   3   1  -2   20.98    1.14
  -3  -1   2   20.22    1.10
   3   1  -2   20.27    1.00
   3  -1  -2   20.83    1.21
   3  -1  -2   18.68    0.97
  -3   1   2   20.79    1.05
   3  -1  -2   20.37    1.09
  -3  -1   2   20.75    1.15
  -3   1   2   22.01    1.16
  -3  -1   2   19.55    0.89
  -3   1   2   20.56    1.21
   3   1  -2   19.27    0.86
   3  -1  -2   22.04    1.16
  -2   0   4   96.90    2.92
  -2   0   4   88.93    2.69
   2   0  -4   90.55    2.54
  -2   0   4   88.70    2.51
  -2   0   4   93.39    2.83
  -3   0   3    6.82    0.61
   3   0  -3    8.04    0.83
  -3   0   3    7.46    0.57
  -3   0   3    7.04    0.78
   3   0  -3    7.01    0.55
  -3   0   3    7.24    0.83
   1   1  -4   16.20    1.34
  -1   1   4   15.75    1.01
   1  -1  -4   15.01    0.90
   1  -1  -4   15.21    0.99
  -1  -1   4   18.68    1.49
  -1  -1   4   15.09    1.28
  -1   1   4   16.98    1.02
  -1  -1   4   16.35    0.92
   1   1  -4   13.76    0.72
  -1   1   4   14.99    0.90
  -1  -1   4   15.75    0.79
   0   2   2    1.68    0.34
   0  -2   2    1.54    0.36
   0  -2   2    1.72    0.29
   0  -2  -2    1.56    0.43
   0  -2  -2    1.24    0.66
   0   2   2    1.45    0.58
   0  -2   2    1.12    0.26
  -3  -1  -2    7.56    0.67
  -3  -1  -2    7.76    0.74
   3   1   2    7.79    0.67
  -3   1  -2    7.50    0.54
   3  -1   2    7.80    0.62
   3  -1   2    8.74    0.87
   3  -1   2    8.58    0.86
   1   1   4   38.93    1.54
   1  -1   4   38.17    1.28
   1   1   4   36.41    0.67
  -1   1  -4   37.28    1.27
   1  -1   4   37.23    1.43
   1   1   4   36.14    1.00
  -1   1  -4   40.11    1.52
  -1  -1  -4   36.53    1.13
   2   0   4  116.37    3.29
   2   0   4  106.10    3.04
  -2   0  -4  104.66    3.06
   2   0   4  115.18    3.38
   3   0   3    6.96    0.71
  -3   0  -3    9.14    0.98
  -3   0  -3    6.46    0.64
   3   0   3    8.37    0.79
   3   0   3    7.15    0.65
  -1  -2   2    0.86    0.45
   1  -2  -2    1.51    0.66
   1  -2  -2    0.72    0.62
   1  -2  -2    1.12    0.57
  -1   2   2    0.86    0.41
   1  -2  -2    1.14    0.32
  -1   2   2    1.01    0.61
  -1  -2   2    0.99    0.27
  -1   2   2    0.98    0.22
  -1  -2   2    0.80    0.20
   4   0   0  146.37    4.08
  -4   0   0  154.00    4.29
  -4   0   0  147.65    3.92
   4   0   0  147.64    3.96
  -4   0   0  135.75    3.84
   1  -2   2  188.06    5.05
  -1  -2  -2  177.94    4.94
   1   2   2  188.07    4.91
  -1  -2  -2  189.63    4.98
   1  -2   2  189.42    4.96
  -1  -2  -2  194.65    5.10
  -1  -2  -2  184.96    4.99
  -2  -2   0    6.41    1.24
   2   2   0    8.32    1.33
   2  -2   0    7.08    0.61
   2   2   0    7.58    0.43
  -2  -2   0    7.72    0.46
   2  -2   0    7.77    0.77
  -2   2   0    7.87    0.60
   2  -2   0    6.95    0.77
   2  -2   0    7.52    0.69
  -2  -2   0    7.22    0.60
   4   0  -1   -0.11    0.54
  -4   0   1   -0.02    0.26
   4   0  -1   -0.06    0.25
   4   0  -1    0.31    0.64
   2  -2  -1  115.41    3.28
  -2   2   1  123.87    3.37
  -2  -2   1  113.87    3.33
   2  -2  -1  123.07    3.49
   2  -2  -1  126.51    3.50
  -2  -2   1  121.08    3.41
  -2  -2   1  121.43    3.33
  -2   2   1  119.65    3.38
  -2  -2   1  121.60    3.17
   2  -2  -1  117.84    3.35
   2   2  -1  116.64    3.45
  -4   0  -1   -0.20    0.64
   4   0   1    1.02    0.68
  -4   0  -1   -0.07    0.30
   4   0   1    0.10    0.37
  -4   0  -1    0.13    0.21
   4   0   1    0.11    0.52
   2  -2   1  113.70    3.06
   2  -2   1  105.40    3.08
   2   2   1  104.62    2.75
   2  -2   1  101.53    2.92
   2  -2   1  111.99    3.19
  -2  -2  -1  107.43    2.97
   2   2   1  113.42    3.08
  -2  -2  -1  105.86    2.80
   0   0   5    1.03    1.04
  -2  -1   4  412.13    3.10
  -2   1   4  404.06    2.99
   2   1  -4  406.62    3.10
  -2   1   4  409.02    2.97
   3   1  -3   42.04    1.25
  -3  -1   3   41.09    1.26
   3  -1  -3   40.02    1.33
  -3   1   3   40.81    1.48
   3  -1  -3   44.27    1.61
  -3  -1   3   41.96    1.46
  -3   1   3   43.05    1.45
   3  -1  -3   41.37    1.45
  -3  -1   3   42.73    1.55
   3   1  -3   42.87    1.49
   1   0  -5    0.87    0.52
  -1   0   5    0.32    0.58
   4   0  -2    2.44    0.58
  -4   0   2    2.66    0.71
   4   0  -2    1.63    0.31
   0  -2   3  308.80    7.93
   0   2  -3  306.22    7.84
   0   2   3  331.77    8.60
   0   2   3  327.48    8.57
   0  -2   3  304.89    7.98
   0  -2   3  314.28    8.13
   0  -2  -3  317.30    8.44
   0  -2  -3  317.38    8.33
   1   0   5   57.91    1.97
   1   0   5   59.80    1.87
   1   0   5   60.93    1.88
  -1   0  -5   57.07    1.79
   2  -1   4  140.84    3.84
   2   1   4  147.15    4.01
   2  -1   4  155.12    4.31
  -2   1  -4  148.63    3.99
   2   1   4  145.90    4.03
   2  -1   4  149.25    4.13
   2   1   4  142.56    4.06
  -2  -1  -4  142.64    4.06
   2  -1   4  138.76    3.89
  -2  -2   2   88.35    2.60
   2  -2  -2   90.51    2.69
  -2   2   2   90.69    2.68
  -2  -2   2   93.67    2.67
  -2  -2   2   91.34    2.55
   2   2  -2   89.58    2.50
  -2   2   2   90.79    2.68
   2  -2  -2   85.33    2.57
  -2  -2   2   87.30    2.30
  -3  -1  -3   16.63    0.92
  -3  -1  -3   16.53    1.00
   3   1   3   18.16    1.12
   3  -1   3   20.43    1.44
   3  -1   3   17.97    1.02
   3   1   3   17.36    0.93
   3  -1   3   17.31    1.08
   4  -1   0  195.49    5.14
  -4  -1   0  207.76    5.60
   4   1   0  209.14    5.60
  -4   1   0  219.66    5.95
   4  -1   0  214.44    5.81
  -4  -1   0  206.88    5.58
   4  -1   0  201.48    5.26
   4   1   0  203.25    5.47
  -4  -1   0  202.19    5.34
   4  -1   0  217.05    5.88
   3   0  -4    0.06    0.57
  -3   0   4   -0.34    0.62
   3   0  -4    0.05    0.32
  -3   0   4   -0.11    0.48
  -3   0   4    0.19    0.37
  -1  -2   3    7.17    0.64
  -1  -2   3    6.55    0.64
  -1   2   3    6.16    0.69
   1  -2  -3    6.89    0.83
   1  -2  -3    8.27    0.54
   1  -2  -3    6.57    0.78
  -1  -2   3    7.08    0.41
   1  -2  -3    7.34    0.72
  -1   2   3    7.25    0.63
  -1   2   3    7.99    0.81
   2   2   2   25.75    1.15
   2  -2   2   27.24    1.35
  -2  -2  -2   24.14    1.35
   2  -2   2   25.88    1.15
  -2  -2  -2   24.40    1.05
   2   2   2   22.79    0.96
   2  -2   2   23.83    1.25
  -2   2  -2   25.49    1.25
  -2  -2  -2   26.32    1.22
  -4   0  -2    0.33    0.59
   4   0   2   -0.14    0.46
   4   0   2    0.39    0.45
  -4   0  -2    0.76    0.42
   4   0   2    0.25    0.57
   4  -1  -1    0.15    0.28
  -4  -1   1    0.05    0.26
  -4  -1   1    0.73    0.48
   4   1  -1    0.26    0.33
   4  -1  -1    0.40    0.61
   4  -1  -1   -0.17    0.34
   4   1  -1    0.46    0.49
  -4  -1   1   -0.05    0.60
  -1  -2  -3    1.23    0.61
  -1  -2  -3    1.46    0.30
   1   2   3    1.64    0.53
  -1  -2  -3    2.71    0.63
  -1   2  -3    1.49    0.35
  -1   2  -3    1.45    0.29
   1   2   3    1.86    0.29
  -1  -2  -3    2.12    0.36
   1  -2   3    1.79    0.42
  -1   2  -3    1.75    0.27
  -4   1  -1    0.61    0.56
  -4  -1  -1    0.57    0.39
  -4  -1  -1    0.17    0.41
   4  -1   1    0.51    0.63
   4  -1   1    0.33    0.44
   4  -1   1    0.64    0.31
   4   1   1    0.20    0.54
  -4  -1  -1   -0.07    0.54
  -4   1  -1    0.44    0.25
   4   1   1    0.42    0.44
   4  -1   1    0.74    0.64
   0  -1  -5   11.19    0.80
   0  -1   5   12.54    0.73
   0  -1  -5   12.48    0.97
   0   1   5   11.89    0.74
   0  -1   5   11.83    1.33
   0  -1   5   11.18    0.61
   0   1  -5   12.11    0.88
   0   1  -5   12.42    0.88
   0   1   5   12.90    0.99
   0  -1   5   11.65    0.89
   0   1   5   11.57    0.87
  -2   0   5   -0.29    0.37
   2   0  -5    0.04    0.35
  -3   0  -4   -0.44    0.46
  -3   0  -4    0.27    0.42
   3   0   4   -0.06    0.56
  -3   0  -4    0.38    0.51
   3   0   4    0.67    0.51
   3   0   4   -0.69    0.48
  -1   1   5   11.18    0.75
   1  -1  -5   10.37    0.77
  -1   1   5   10.62    0.88
   1   1  -5   10.10    0.75
  -1   1   5   11.31    0.79
  -1  -1   5   11.00    0.85
   1   1  -5   10.98    0.75
  -1  -1   5   11.26    0.65
   1  -1  -5   10.95    0.76
  -1  -1   5   10.46    0.77
  -3   2   0  142.50    3.93
  -3  -2   0  150.73    4.11
  -3  -2   0  154.10    4.25
  -3  -2   0  144.96    4.03
  -3   2   0  154.77    4.23
   3   2   0  147.12    4.13
  -3  -2   0  155.74    4.02
   3  -2   0  152.79    4.24
   3  -2   0  153.88    4.24
  -4  -1   2    5.18    0.61
   4  -1  -2    4.99    0.76
  -4   1   2    5.04    0.72
   4  -1  -2    4.66    0.54
   4   1  -2    5.35    0.44
  -4  -1   2    5.24    0.72
   4  -1  -2    5.31    0.71
   4  -1  -2    4.42    0.49
   4   1  -2    4.58    0.36
  -4   1   2    5.83    0.63
  -4  -1   2    4.55    0.39
   4   1  -2    6.25    0.67
   4   0  -3   -0.09    0.61
  -4   0   3   -0.33    0.49
   4   0  -3   -0.03    0.32
  -4   0   3   -0.16    0.52
   1  -1   5   29.58    1.33
  -1  -1  -5   28.52    1.51
   1  -1   5   30.07    1.52
  -1   1  -5   32.10    1.64
  -1  -1  -5   28.76    1.35
   1   1   5   28.62    1.26
  -1   1  -5   29.44    1.29
   1   1   5   29.16    1.44
   1   1   5   29.84    1.55
  -3  -2   1    3.95    0.54
   3  -2  -1    3.67    0.65
  -3   2   1    3.08    0.56
   3  -2  -1    3.11    0.49
  -3   2   1    2.89    0.49
   3  -2  -1    3.97    0.55
  -3  -2   1    2.86    0.75
   3  -2  -1    3.50    0.52
  -3  -2   1    3.10    0.47
   3   2  -1    3.71    0.92
  -3   2   1    4.28    0.62
   2   0   5    0.49    0.64
   2   0   5   -0.26    0.52
   2   0   5   -0.21    0.43
  -2   0  -5    0.31    0.44
  -2   0  -5   -0.01    0.41
  -2   0  -5    0.17    0.39
  -2   0  -5   -0.18    0.54
   2   0   5   -0.22    0.25
  -2  -2   3  226.88    5.86
   2   2  -3  234.60    6.13
  -2   2   3  247.00    6.44
  -2  -2   3  230.15    6.15
  -2   2   3  243.76    6.53
  -2  -2   3  224.81    5.95
   2  -2  -3  244.79    6.54
  -2   2   3  230.78    6.16
   2  -2  -3  234.83    6.33
   3  -2   1    3.01    0.96
   3  -2   1    6.22    0.70
  -3   2  -1    5.26    0.93
   3  -2   1    5.87    0.47
   3  -2   1    4.86    0.68
  -3  -2  -1    5.30    0.57
  -3  -2  -1    5.66    0.56
  -3  -2  -1    4.95    0.33
   3   2   1    4.87    0.69
  -3  -2  -1    5.03    0.66
   3   2   1    6.30    0.55
  -3  -1   4    0.42    0.59
   3   1  -4    1.18    0.51
   3  -1  -4    0.58    0.43
  -3  -1   4    1.15    0.30
   3   1  -4    1.12    0.24
  -3  -1   4    0.40    0.40
  -3   1   4    0.79    0.46
   3  -1  -4    0.90    0.63
  -3   1   4    0.50    0.44
   3  -1  -4    1.16    0.56
  -3   1   4    0.33    0.56
  -3   1   4    0.80    0.59
  -4   1  -2   17.71    1.07
   4  -1   2   17.90    0.94
  -4   1  -2   16.97    0.82
  -4  -1  -2   18.47    1.03
  -4  -1  -2   17.68    0.97
   4   1   2   18.67    1.01
   4  -1   2   18.51    1.11
   4  -1   2   19.06    1.12
   4   1   2   17.53    0.98
   2   2   3    7.92    0.55
  -2  -2  -3    8.43    0.62
  -2   2  -3    7.44    0.60
   2  -2   3    8.72    0.77
  -2   2  -3    6.75    0.47
  -2   2  -3    8.89    0.70
   2  -2   3    8.23    0.64
   2  -2   3    6.96    0.66
  -2  -2  -3    6.09    0.67
  -2  -2  -3    6.37    0.77
   2   2   3    6.15    0.39
   4   0   3    0.13    0.55
   4   0   3   -0.24    0.55
  -4   0  -3    0.60    0.39
   0   2   4   30.06    1.36
   0  -2  -4   30.92    1.59
   0   2   4   27.96    1.42
   0  -2   4   31.02    1.71
   0  -2   4   30.01    1.42
  -2  -1   5   51.41    1.75
   2  -1  -5   49.93    1.59
  -2  -1   5   47.01    1.44
   2   1  -5   49.99    1.65
  -2   1   5   48.80    1.57
   2  -1  -5   49.14    1.74
  -2   1   5   49.85    1.47
  -2  -1   5   53.28    1.83
   2   1  -5   48.25    1.75
   2   1  -5   51.18    1.78
  -2  -1   5   50.16    1.71
  -2   1   5   50.43    1.71
  -2   1   5   50.00    1.79
   3   2  -2   24.03    1.14
   3  -2  -2   25.83    1.28
  -3   2   2   24.21    1.16
   3  -2  -2   23.73    1.25
  -3   2   2   23.44    1.22
   3   2  -2   22.99    1.27
  -3  -2   2   26.00    1.18
  -3  -2   2   23.16    1.17
  -3   2   2   23.61    1.17
   3  -2  -2   21.71    1.14
  -3  -2   2   23.78    1.17
   3   1   4    2.00    0.17
   3  -1   4    1.23    0.78
  -3   1  -4    2.02    0.58
   3  -1   4    1.40    0.57
   3   1   4    2.10    0.63
  -3  -1  -4    1.99    0.55
   3  -1   4    1.82    0.55
  -3  -1  -4    2.12    0.22
  -3  -1  -4    2.67    0.53
   3  -1   4    1.90    0.48
   3   1   4    1.69    0.44
  -3   1  -4    2.31    0.35
  -1   2   4    4.67    0.67
  -1  -2   4    4.62    0.78
  -1  -2   4    4.68    0.51
  -1   2   4    5.58    0.60
  -1  -2   4    4.85    0.53
   1  -2  -4    5.54    0.64
  -1  -2   4    5.14    0.38
  -1  -2   4    5.13    0.32
   1  -2  -4    4.40    0.39
   1  -2  -4    5.65    0.74
  -1   2   4    4.67    0.70
   1  -2  -4    6.00    0.67
   3   2   2    1.55    0.18
  -3  -2  -2    0.83    0.61
   3  -2   2    1.49    0.31
  -3  -2  -2    1.78    0.39
  -3  -2  -2    1.35    0.20
  -3   2  -2    1.71    0.52
   3  -2   2    0.99    0.52
   3  -2   2    1.04    0.76
   3  -2   2    1.64    0.63
   3   2   2    1.08    0.38
  -4  -1   3   -0.28    0.28
   4   1  -3   -0.08    0.23
   4  -1  -3   -0.02    0.36
  -4   1   3   -0.21    0.40
   4  -1  -3   -0.36    0.44
   4   1  -3    0.19    0.24
   4   1  -3    0.26    0.50
  -4  -1   3   -0.06    0.62
  -4   1   3   -0.06    0.48
  -4  -1   3   -0.07    0.51
   4  -1  -3    0.45    0.62
  -4   1   3    0.51    0.56
  -1  -2  -4    0.86    0.56
   1  -2   4    0.78    0.46
   1   2   4    1.40    0.57
  -1   2  -4    0.68    0.33
  -1  -2  -4    0.19    0.57
   1  -2   4    0.60    0.45
  -1   2  -4    1.01    0.34
  -1   2  -4    1.52    0.29
   1   2   4    0.70    0.27
  -1  -2  -4    0.55    0.28
   1  -2   4    0.76    0.53
   1  -2   4    1.17    0.25
   0   0   6   31.46    1.46
   0   0  -6   27.55    1.24
   0   0   6   30.76    1.57
   0   0   6   30.17    1.45
   0   0  -6   31.23    1.53
   2  -1   5    8.67    0.80
   2  -1   5    8.59    0.64
   2   1   5    8.69    0.77
   2  -1   5    9.83    0.68
  -2   1  -5   10.65    0.80
  -2   1  -5    8.30    0.57
   2   1   5    8.33    0.59
  -2  -1  -5    9.56    0.62
   2   1   5    8.19    0.50
   2   1   5    9.17    0.92
  -2  -1  -5    9.21    0.88
   5   0   0    0.18    0.52
  -5   0   0    0.09    0.26
   5   0   0   -0.10    0.22
   3   0  -5    1.78    0.34
   3   0  -5    1.38    0.56
  -3   0   5    1.77    0.41
  -3   0   5    1.68    0.44
  -3   0   5    1.67    0.56
  -3   0   5    2.17    0.66
   1   0  -6    0.00    0.52
  -1   0   6   -0.42    0.46
  -1   0   6   -0.41    0.57
  -1   0   6   -0.38    0.42
   1   0  -6    0.02    0.26
   5   0  -1  111.46    3.21
   5   0  -1  115.43    3.33
  -5   0   1  106.58    3.11
   5   0  -1  107.64    2.89
   4   0  -4   20.63    0.96
  -4   0   4   20.75    0.99
  -4   0   4   21.69    1.07
   4   0  -4   19.21    1.13
   4   0  -4   21.85    1.22
  -4   0   4   20.73    1.13
  -4   0   4   21.62    1.22
  -5   0  -1   47.32    1.65
   5   0   1   50.25    1.72
   5   0   1   46.88    1.48
   5   0   1   50.03    1.65
  -5   0  -1   50.04    1.52
  -5   0  -1   49.39    1.43
  -4   1  -3    2.10    0.40
   4   1   3    1.44    0.48
  -4  -1  -3    1.45    0.49
   4  -1   3    2.29    0.65
  -4   1  -3    1.91    0.55
   4  -1   3    2.02    0.43
  -4  -1  -3    1.94    0.48
   4  -1   3    2.17    0.55
  -4   1  -3    1.77    0.28
   1   0   6   -0.15    0.60
  -1   0  -6    0.31    0.80
   1   0   6    0.02    0.29
   2  -2  -4   57.38    1.90
  -2   2   4   58.43    1.84
  -2  -2   4   56.96    1.81
  -2   2   4   57.10    1.82
  -2   2   4   57.67    1.89
   2  -2  -4   58.15    1.90
   2   2  -4   55.42    1.75
  -2  -2   4   56.70    1.81
  -2   2   4   56.37    1.64
   3  -2  -3   62.21    1.89
  -3   2   3   58.35    1.77
  -3  -2   3   58.67    1.86
   3  -2  -3   59.66    1.94
  -3   2   3   63.90    2.04
  -3   2   3   57.82    1.82
   3  -2  -3   59.73    1.85
   3   2  -3   58.27    1.76
  -3  -2   3   63.82    1.78
   3   2  -3   58.10    1.76
  -5   0   2   -0.79    0.57
   5   0  -2   -0.05    0.59
   5   0  -2   -0.01    0.26
   3   0   5   24.42    1.19
  -3   0  -5   24.78    1.21
  -3   0  -5   25.71    1.07
   3   0   5   26.04    1.35
  -3   0  -5   26.16    1.33
  -3   0  -5   24.49    1.25
   3   0   5   25.50    1.26
  -3   0  -5   25.85    1.24
   0  -3   0   -0.15    0.29
   0  -3   0    0.02    0.21
   0  -3   0   -0.16    0.51
   0   3   0    0.54    0.47
   0  -1   6    0.93    0.55
   0   1   6    0.32    0.37
   0  -1  -6    0.74    0.49
   0  -1   6    0.97    0.81
   0   1  -6    0.68    0.68
   0   1   6    0.40    0.48
   0   1   6    0.68    0.58
   0   1  -6    0.80    0.31
   0   1  -6    0.53    0.55
   0  -1  -6    0.37    0.55
   0  -1   6    0.49    0.33
  -2   2  -4    9.00    0.61
   2  -2   4    9.57    0.98
  -2  -2  -4    8.33    0.59
   2  -2   4   10.23    0.69
   2   2   4    8.67    0.51
  -2  -2  -4    9.52    0.87
   2  -2   4    8.96    0.55
  -2   2  -4    9.71    0.57
  -2   2  -4   11.25    0.80
   2  -2   4    8.80    0.69
   2   2   4    9.64    0.62
   2   2   4    8.30    0.66
   2   0  -6   19.09    1.14
  -2   0   6   18.48    0.97
   2   0  -6   18.96    0.92
  -2   0   6   16.35    0.79
   2   0  -6   15.56    0.87
  -2   0   6   16.83    1.03
  -2   0   6   17.94    1.08
  -3  -2  -3    9.90    0.53
   3   2   3    9.29    0.51
  -3   2  -3    9.53    0.73
   3  -2   3   10.68    0.82
   3  -2   3    9.66    0.69
   3  -2   3    9.66    0.80
   3   2   3    9.43    0.63
  -3  -2  -3    8.34    0.78
  -3   2  -3   10.66    0.74
  -4   0  -4  157.68    4.30
   4   0   4  160.79    4.48
  -4   0  -4  155.62    4.31
   4   0   4  161.45    4.48
  -4   0  -4  153.18    4.30
   4   0   4  146.43    4.08
  -5   1   0    1.05    0.58
   5  -1   0    0.18    0.29
  -5  -1   0    0.38    0.45
   5  -1   0   -0.17    0.58
  -5   1   0    0.61    0.32
   5   1   0    0.78    0.51
   5   1   0    0.47    0.40
  -5  -1   0    0.10    0.29
   5  -1   0    0.59    0.29
  -5   1   0    0.32    0.23
   5   1   0    0.17    0.49
  -5  -1   0    0.26    0.49
   5  -1   0   -0.00    0.53
  -3   1   5   17.54    1.07
  -3   1   5   16.28    0.85
   3  -1  -5   17.51    0.91
   3  -1  -5   15.78    0.90
  -3  -1   5   16.05    0.99
   3   1  -5   16.37    0.99
  -3   1   5   17.26    0.92
   3   1  -5   16.26    1.01
  -3  -1   5   16.65    1.02
  -3   1   5   16.28    1.01
  -3  -1   5   16.71    0.97
   3  -1  -5   14.49    0.95
   3   1  -5   16.83    0.95
  -3  -1   5   16.78    0.84
   3   1  -5   17.19    0.83
   0  -3   1   63.05    2.73
   0  -3   1   63.75    1.85
   0  -3  -1   64.60    1.99
   0  -3  -1   60.23    1.78
   0   3  -1   61.04    1.85
   0   3   1   63.69    1.81
   0  -3   1   64.77    1.80
   0   3   1   61.88    1.98
   0  -3  -1   59.45    1.96
   4  -2   0    2.83    0.47
  -4   2   0    2.09    0.49
   4  -2   0    2.34    0.61
   4   2   0    2.54    0.49
   4  -2   0    3.05    0.62
  -4  -2   0    2.34    0.42
   4  -2   0    2.46    0.29
  -4  -2   0    1.99    0.50
   4   2   0    2.59    0.55
  -4   2   0    2.49    0.49
  -4  -2   0    1.77    0.42
   1  -1  -6   14.99    0.84
   1  -1  -6   14.71    0.90
  -1   1   6   13.91    0.86
   1   1  -6   14.15    0.96
   1   1  -6   13.33    0.79
  -1   1   6   14.97    1.00
   1   1  -6   14.47    0.87
  -1   1   6   15.41    0.88
  -1  -1   6   15.11    0.97
  -1  -1   6   14.55    0.77
   1  -1  -6   14.22    1.02
   1  -1  -6   15.37    0.74
  -1  -1   6   14.76    0.99
   5  -1  -1    3.49    0.62
  -5  -1   1    3.44    0.58
   5   1  -1    4.28    0.57
  -5  -1   1    3.60    0.36
  -5  -1   1    4.09    0.57
   5  -1  -1    4.21    0.42
   5   1  -1    3.75    0.45
  -5   1   1    4.10    0.46
   5  -1  -1    4.47    0.75
  -5   1   1    3.62    0.60
   5  -1  -1    3.75    0.35
  -5   0  -2   -0.10    0.57
   5   0   2   -0.11    0.56
   5   0   2   -0.24    0.43
  -5   0  -2   -0.08    0.35
   5   0   2   -0.19    0.38
  -1   3   0    7.14    0.61
  -1  -3   0    7.09    0.48
   1  -3   0    7.06    0.59
   1   3   0    7.19    0.67
   1   3   0    6.02    0.40
   1  -3   0    5.55    0.61
   1  -3   0    8.35    0.58
  -1  -3   0    6.68    0.75
   1  -3   0    6.67    0.70
  -4   2   1   51.17    1.65
  -4  -2   1   52.28    1.66
  -4   2   1   50.33    1.60
   4  -2  -1   52.76    1.72
   4  -2  -1   49.86    1.55
   4   2  -1   55.48    1.76
   4  -2  -1   53.69    1.68
  -4  -2   1   54.73    1.67
   4  -2  -1   56.76    1.86
  -4  -2   1   53.27    1.71
   4   2  -1   53.00    1.73
  -4   1   4    2.99    0.49
   4   1  -4    3.38    0.49
   4   1  -4    2.82    0.28
   4   1  -4    3.53    0.61
  -4  -1   4    2.97    0.58
  -4   1   4    3.07    0.47
  -4  -1   4    2.21    0.30
   4  -1  -4    2.61    0.37
   4  -1  -4    2.17    0.51
  -4   1   4    2.26    0.62
   4  -1  -4    2.74    0.60
  -4  -1   4    2.23    0.56
   1  -3  -1   10.36    0.74
  -1  -3   1   10.85    0.57
   1  -3  -1   10.50    0.70
   1   3  -1   10.57    0.77
   1  -3  -1   10.38    0.69
   1  -3  -1   11.29    0.62
  -1   3   1    9.37    0.66
  -1  -3   1    9.87    0.69
  -1   3   1   11.31    0.80
   5  -1   1   37.17    1.43
  -5  -1  -1   34.67    0.80
   5  -1   1   33.56    0.99
  -5   1  -1   32.78    1.40
  -5   1  -1   36.09    1.00
  -5   1  -1   31.30    1.37
   5   1   1   33.54    0.89
   5  -1   1   34.53    0.73
   5   1   1   35.15    0.89
  -5  -1  -1   36.25    1.01
   5  -1   1   33.69    0.63
   1  -1   6    0.94    0.36
   1   1   6    0.66    0.47
  -1  -1  -6    0.79    0.65
  -1   1  -6    0.66    0.32
   1  -1   6    0.55    0.31
  -1  -1  -6    0.94    0.41
   1  -1   6    0.00    0.70
  -1  -1  -6    0.57    0.29
  -1   1  -6    0.55    0.47
   1   1   6    0.32    0.58
   1   1   6    0.49    0.30
  -1   1  -6    0.83    0.29
   1  -1   6    0.69    0.58
   4  -2   1   15.04    0.75
  -4   2  -1   12.75    0.88
  -4  -2  -1   13.96    0.86
   4   2   1   12.86    0.90
   4  -2   1   12.77    0.90
  -4  -2  -1   12.67    0.78
  -4   2  -1   12.28    0.98
   4   2   1   14.54    0.82
  -4  -2  -1   14.07    0.86
   4  -2   1   14.48    0.96
   4  -2   1   11.49    0.72
  -4  -2  -1   12.80    0.57
   1  -3   1    1.21    0.34
  -1  -3  -1    0.76    0.59
   1  -3   1    1.48    0.42
  -1  -3  -1    1.39    0.33
   1   3   1    0.92    0.19
   1  -3   1    1.09    0.46
   1   3   1    1.49    0.54
   0   2  -5   62.77    1.75
   0  -2   5   62.84    1.99
   0  -2  -5   59.70    1.98
   0   2  -5   59.39    1.85
   0  -2   5   60.17    1.96
   0  -2   5   60.85    1.90
   0   2   5   61.68    1.92
   0  -2  -5   65.75    2.01
   0  -2   5   63.59    1.82
   0   2   5   58.63    1.75
   0  -2   5   57.39    1.58
   0   2   5   62.18    2.05
  -2   0  -6   14.39    0.84
   2   0   6   13.97    0.79
   2   0   6   15.55    0.75
   2   0   6   16.20    1.04
   2   0   6   15.64    0.90
  -2   0  -6   15.53    0.84
  -1  -2   5   11.67    0.76
   1  -2  -5   11.34    0.75
  -1   2   5   11.81    0.73
   1  -2  -5   11.63    0.90
  -1  -2   5   11.64    0.70
  -1   2   5   12.49    0.92
  -1   2   5   11.51    0.83
  -1  -2   5   11.57    0.61
  -1  -2   5   12.02    1.15
  -1  -2   5   11.35    0.60
   1   2  -5   11.73    0.72
  -5   1   2    5.26    0.48
   5  -1  -2    5.89    0.75
  -5  -1   2    6.00    0.60
  -5   1   2    6.05    0.73
   5   1  -2    5.79    0.45
  -5  -1   2    5.55    0.72
   5   1  -2    6.32    0.66
   5  -1  -2    5.53    0.73
  -5   1   2    5.88    0.65
   5  -1  -2    6.02    0.51
  -5  -1   2    6.21    0.45
   5   0  -3   25.70    1.30
   5   0  -3   23.70    1.07
  -5   0   3   25.05    1.31
  -3  -1  -5  104.42    3.08
  -3   1  -5  110.74    3.08
  -3  -1  -5  109.28    3.10
   3   1   5  105.72    3.01
  -3  -1  -5  102.64    2.79
   3   1   5  103.64    2.83
   3   1   5  102.47    3.03
   3  -1   5  103.09    3.03
   3   1   5  105.65    3.08
   3  -1   5  111.58    3.25
  -3   1  -5  109.48    3.23
   0   3   2  109.31    3.16
   0  -3  -2  110.15    3.24
   0  -3   2  109.34    2.99
   0   3   2  115.40    3.12
   0  -3   2  115.62    3.40
   0  -3  -2  113.69    3.16
   4   2  -2  126.75    3.50
  -4   2   2  118.23    3.39
  -4  -2   2  121.75    3.41
   4  -2  -2  118.68    3.34
  -4   2   2  127.43    3.58
   4  -2  -2  123.97    3.55
   4   2  -2  125.45    3.50
   4   2  -2  118.06    3.32
   4  -2  -2  120.16    3.38
  -4  -2   2  122.16    3.45
   1   2   5   27.07    1.41
  -1  -2  -5   25.88    1.31
   1  -2   5   25.26    1.29
  -1  -2  -5   27.06    1.43
   1   2   5   26.55    1.16
   1   2   5   26.23    1.28
   1  -2   5   27.63    1.21
   1  -2   5   28.31    1.39
  -1   2  -5   24.65    1.18
  -2   1   6    2.29    0.63
   2  -1  -6    2.98    0.40
  -2   1   6    2.76    0.50
  -2   1   6    2.27    0.23
  -2   1   6    2.44    0.57
  -2  -1   6    2.29    0.52
  -2  -1   6    2.35    0.36
   2  -1  -6    2.40    0.50
  -2  -1   6    2.46    0.56
  -2  -1   6    2.63    0.54
   2   1  -6    2.75    0.59
   2   1  -6    2.66    0.66
   2   1  -6    2.47    0.49
   1  -3  -2   28.33    1.46
  -1  -3   2   28.22    1.19
  -1   3   2   28.54    1.29
   1  -3  -2   29.76    1.41
   1  -3  -2   28.43    1.24
  -1  -3   2   27.87    1.49
   1  -3  -2   29.63    1.44
   4  -1   4   80.81    2.42
  -4  -1  -4   80.27    2.40
   4  -1   4   87.29    2.60
  -4  -1  -4   85.63    2.32
   4   1   4   86.94    2.55
  -4   1  -4   83.99    2.39
   4  -1   4   86.67    2.60
  -4  -1  -4   80.35    2.43
  -4  -1  -4   86.46    2.53
   4   1   4   80.87    2.47
  -3  -2   4   60.73    1.91
   3  -2  -4   61.68    1.98
   3  -2  -4   57.22    1.76
  -3   2   4   64.10    2.05
  -3   2   4   60.73    1.93
   3  -2  -4   64.29    2.07
  -3  -2   4   63.49    1.96
   3   2  -4   63.27    1.89
   1  -3   2    0.35    0.35
  -1  -3  -2   -0.04    0.54
   1  -3   2    0.43    0.22
   1  -3   2    0.70    0.33
  -1   3  -2    0.57    0.19
  -1  -3  -2   -0.23    0.45
   1   3   2    0.82    0.52
   1  -3   2   -0.00    0.34
  -1   3  -2    0.19    0.23
  -1  -3  -2    0.13    0.34
   1   3   2    0.44    0.20
  -2  -3   0   26.25    1.11
  -2  -3   0   24.28    1.30
   2   3   0   25.66    1.33
   2  -3   0   25.55    1.27
   2   3   0   24.45    1.01
  -2  -3   0   26.37    1.19
   2  -3   0   25.37    1.25
   2  -3   0   24.79    1.22
   5   1   2   33.26    0.91
  -5  -1  -2   33.46    0.92
   5   1   2   34.36    0.89
   5  -1   2   33.48    0.81
  -5  -1  -2   31.98    1.45
  -5   1  -2   32.62    1.60
   5  -1   2   33.65    0.95
  -5   1  -2   32.46    1.41
   5  -1   2   31.54    1.53
   4   2   2    9.10    0.68
   4  -2   2    7.39    0.72
  -4  -2  -2    6.64    0.39
  -4  -2  -2    7.92    0.67
  -4  -2  -2    8.67    0.70
   4   2   2    7.03    0.71
  -4   2  -2    7.55    0.68
   4  -2   2   10.25    0.73
   4  -2   2    5.63    0.65
   4  -2   2    8.73    0.60
  -4  -2  -2    8.06    0.72
  -4   0   5   -0.46    0.56
  -4   0   5    0.20    0.41
  -4   0   5   -0.12    0.34
   4   0  -5   -0.33    0.46
  -4   0   5    0.02    0.41
   4   0  -5    0.36    0.28
   4   0  -5    0.33    0.53
  -2  -3   1    0.95    0.22
  -2  -3   1    0.19    0.98
  -2   3   1    0.75    0.42
   2  -3  -1    0.67    0.54
   2  -3  -1    0.73    0.39
  -2   3   1    0.72    0.39
   2  -3  -1    0.33    0.49
   2  -3  -1    0.13    0.51
  -2  -3   1    0.74    0.32
  -2   3   1    0.82    0.22
   2   3  -1    0.42    0.89
  -5   0  -3   38.05    1.37
   5   0   3   40.24    1.43
  -5   0  -3   35.34    0.82
   2   3   1    4.69    0.65
   2  -3   1    5.38    0.60
   2   3   1    4.77    0.31
  -2  -3  -1    5.00    0.38
  -2  -3  -1    5.21    0.44
  -2  -3  -1    4.19    0.65
   2  -3   1    4.22    0.47
   2  -3   1    5.30    0.56
   2  -3   1    4.57    0.54
  -2   3  -1    5.45    0.52
  -3   0   6    0.09    0.38
  -3   0   6   -0.41    0.35
  -3   0   6   -0.31    0.48
   3   0  -6    0.08    0.53
  -3   0   6   -0.44    0.55
   3   0  -6    0.20    0.45
   3   0  -6   -0.36    0.53
   3   0  -6   -0.09    0.31
  -2  -1  -6    3.45    0.64
   2   1   6    3.59    0.73
   2   1   6    3.96    0.32
  -2  -1  -6    4.13    0.57
   2  -1   6    4.38    0.47
   2   1   6    4.10    0.58
   2  -1   6    3.95    0.58
   2   1   6    3.13    0.38
  -2  -1  -6    3.24    0.44
   2  -1   6    4.53    0.55
  -2  -1  -6    4.42    0.44
  -2   1  -6    4.36    0.41
  -2   1  -6    3.65    0.60
  -2   2   5    1.95    0.58
  -2   2   5    1.79    0.47
   2  -2  -5    2.41    0.65
  -2  -2   5    2.92    0.59
  -2  -2   5    2.36    0.44
   2   2  -5    2.78    0.45
  -2  -2   5    2.14    0.29
   2  -2  -5    2.69    0.47
  -2   2   5    3.39    0.31
  -2  -2   5    2.19    0.79
   2   2  -5    2.27    0.45
  -2   2   5    2.91    0.52
  -3  -2  -4    0.45    0.44
   3   2   4    0.62    0.29
   3  -2   4    0.31    0.42
   3   2   4    0.45    0.16
   3  -2   4    0.20    0.28
  -3   2  -4    0.49    0.47
  -3  -2  -4    0.97    0.58
  -3   2  -4    0.59    0.27
   3  -2   4    0.67    0.58
  -3   2  -4    0.50    0.38
   3  -2   4    0.52    0.50
   5   1  -3   27.11    1.16
   5   1  -3   32.39    1.37
   5  -1  -3   27.59    1.24
  -5   1   3   27.05    1.39
  -5  -1   3   29.10    1.44
   5   1  -3   31.09    1.49
   5  -1  -3   27.68    1.30
   5  -1  -3   31.34    1.54
  -5   1   3   31.24    1.47
   5   1  -3   31.22    1.47
  -5  -1   3   29.26    1.45
   0   0  -7    0.04    0.47
   0   0   7   -0.10    0.42
   0   0  -7    0.43    0.35
   0   0  -7    0.09    0.27
   0   0   7   -0.08    0.58
   0   0   7   -0.47    0.37
  -4   2   3    1.33    0.56
  -4  -2   3    1.74    0.50
  -4   2   3    1.99    0.46
   4  -2  -3    0.83    0.61
   4   2  -3    2.31    0.41
  -4  -2   3    0.92    0.23
   4  -2  -3    1.65    0.50
  -4  -2   3    1.94    0.46
  -4   2   3    2.11    0.49
   4  -2  -3    1.81    0.46
   4  -2  -3    0.76    0.44
   4   2  -3    2.11    0.34
   0  -3  -3   24.80    1.29
   0  -3   3   20.91    0.95
   0   3   3   24.88    1.22
   0   3  -3   22.91    0.97
   0   3   3   22.45    1.02
   0  -3  -3   22.96    1.11
   0  -3  -3   20.05    1.14
   0  -3   3   22.78    1.02
  -2   3   2   64.94    1.82
  -2  -3   2   61.67    2.06
  -2  -3   2   65.73    1.91
   2  -3  -2   66.35    2.05
   2  -3  -2   64.35    2.00
  -2   3   2   64.49    1.96
  -2  -3   2   65.55    1.79
   2  -3  -2   63.52    2.04
   2   3  -2   66.53    2.12
   2  -3  -2   68.01    1.99
  -2  -2  -5    1.52    0.67
   2  -2   5    2.12    0.63
   2  -2   5    1.54    0.50
   2  -2   5    2.30    0.51
  -2   2  -5    2.16    0.45
   2   2   5    0.79    0.47
  -2   2  -5    1.65    0.34
   2   2   5    1.56    0.22
   2   2   5    1.25    0.56
   1   0  -7   18.60    1.09
   1   0  -7   18.44    0.87
  -1   0   7   16.53    1.01
  -1   0   7   16.98    0.92
  -1   0   7   17.29    0.99
  -1  -3   3    6.28    0.40
   1  -3  -3    6.68    0.46
   1  -3  -3    5.70    0.70
   1   3  -3    5.93    0.36
   1  -3  -3    6.80    0.68
  -1  -3   3    7.04    0.51
  -1  -3   3    6.29    0.64
  -1   3   3    6.82    0.56
   1  -3  -3    6.32    0.74
  -2  -3  -2    5.89    0.61
  -2  -3  -2    5.72    0.43
   2  -3   2    6.13    0.58
   2  -3   2    5.94    0.43
  -2  -3  -2    5.49    0.68
  -2   3  -2    5.28    0.47
   2   3   2    5.27    0.36
   2   3   2    5.33    0.67
   2  -3   2    6.12    0.59
  -2   3  -2    6.06    0.47
  -2  -3  -2    5.88    0.48
  -4   0  -5    0.35    0.46
  -4   0  -5    0.03    0.35
  -4   0  -5   -0.11    0.37
   4   0   5   -0.10    0.38
   4   0   5   -0.38    0.49
   5   0  -4   -0.29    0.56
   5   0  -4    0.23    0.31
  -5   0   4   -0.12    0.58
  -5   0   4   -0.34    0.47
   5   0  -4    0.34    0.39
   5   0  -4    0.82    0.54
  -4  -1   5   49.60    1.49
   4  -1  -5   50.69    1.54
  -4  -1   5   51.81    1.75
   4  -1  -5   49.37    1.64
  -4  -1   5   51.48    1.74
   4   1  -5   50.18    1.68
  -4   1   5   51.47    1.70
  -4   1   5   49.22    1.67
  -4  -1   5   50.70    1.59
   4   1  -5   49.51    1.67
  -4   1   5   49.78    1.60
   4   1  -5   50.69    1.48
  -1  -3  -3   20.95    1.10
  -1  -3  -3   21.22    1.01
   1   3   3   20.67    0.92
   1   3   3   19.58    1.14
  -1  -3  -3   18.95    1.13
  -1   3  -3   21.36    0.95
   1  -3   3   19.23    0.89
  -1   3  -3   19.82    0.88
   1  -3   3   20.26    0.99
   1  -3   3   20.83    1.02
   3   0   6    0.44    0.55
  -3   0  -6   -0.06    0.43
   3   0   6   -0.47    0.40
  -3   0  -6    0.15    0.20
  -3   0  -6    0.21    0.38
  -3   0  -6    0.25    0.48
   3   0   6   -0.04    0.36
  -3   0  -6   -0.18    0.31
   1   0   7    0.30    0.24
  -1   0  -7    0.52    0.45
   1   0   7    0.06    0.55
   1   0   7    0.20    0.28
  -1   0  -7    0.56    0.36
  -1   0  -7    0.32    0.36
   1   0   7    0.47    0.44
   4   2   3   30.85    1.38
  -4  -2  -3   30.37    1.41
   4  -2   3   30.50    1.48
  -4   2  -3   29.50    1.43
  -4  -2  -3   29.88    1.47
   4  -2   3   29.17    1.33
   4  -2   3   32.12    1.55
  -4   2  -3   31.57    1.51
   4  -2   3   30.22    1.37
   5  -1   3   13.60    0.84
  -5  -1  -3   12.27    0.75
  -5   1  -3   12.41    0.82
   5  -1   3   12.55    0.82
   5   1   3   13.42    0.82
   5  -1   3   14.42    0.95
  -5  -1  -3   12.63    0.83
   5   1   3   12.85    0.79
  -5   1  -3   14.00    0.75
  -3   1   6    3.22    0.54
  -3  -1   6    3.33    0.50
  -3  -1   6    3.47    0.57
   3  -1  -6    4.15    0.50
   3   1  -6    3.48    0.36
  -3   1   6    3.50    0.37
   3  -1  -6    3.66    0.46
  -3  -1   6    3.34    0.37
  -3   1   6    3.14    0.50
  -3   1   6    3.33    0.64
   3   1  -6    3.75    0.54
   3   1  -6    3.57    0.58
  -3  -1   6    3.45    0.60
   3   1  -6    3.36    0.55
   6   0   0   22.87    1.17
  -6   0   0   22.70    1.01
   6   0   0   22.15    1.19
  -6   0   0   23.19    1.04
  -6   0   0   20.57    1.12
   6   0  -1   -0.19    0.59
  -6   0   1   -0.43    0.54
   6   0  -1    0.03    0.20
   6   0  -1   -0.31    0.46
  -6   0   1   -0.59    0.47
  -6   0   1   -0.14    0.22
   3  -3   0   14.40    0.82
   3  -3   0   17.65    0.96
  -3   3   0   17.34    0.93
   3  -3   0   14.19    0.80
  -3  -3   0   14.53    0.78
   3   3   0   16.59    0.71
   3  -3   0   16.24    0.98
   3   3   0   15.93    0.97
  -3  -3   0   15.50    0.69
  -2   0   7    0.06    0.35
  -2   0   7    0.08    0.18
   2   0  -7    0.12    0.56
  -2   0   7    0.09    0.48
  -2   0   7   -0.80    0.50
   2   0  -7   -0.10    0.32
   2   0  -7    0.02    0.54
   0   1  -7    0.03    0.27
   0  -1  -7   -0.07    0.20
   0   1  -7   -0.42    0.53
   0  -1  -7    0.06    0.51
   0  -1   7    0.04    0.52
   0   1   7   -0.05    0.36
   0  -1   7   -0.13    0.31
   0  -1   7   -0.55    0.73
   0   1  -7    0.01    0.71
   0  -1  -7    0.33    0.43
   0   1   7   -0.12    0.37
   0   1   7    0.27    0.54
   0   2  -6   39.95    1.40
   0   2   6   37.28    1.32
   0  -2   6   39.02    1.46
   0  -2   6   36.14    0.71
   0  -2   6   37.05    1.31
   0  -2  -6   38.69    1.47
   3  -3  -1   57.23    1.81
  -3  -3   1   59.65    1.86
   3  -3  -1   58.52    1.87
  -3  -3   1   60.67    1.66
   3   3  -1   60.36    1.98
  -3  -3   1   56.12    1.82
  -1  -1   7   17.74    1.07
   1  -1  -7   18.97    0.86
  -1   1   7   20.40    1.05
   1   1  -7   19.59    0.92
  -1   1   7   19.39    1.11
  -1  -1   7   20.35    1.13
   1   1  -7   20.15    1.04
   1   1  -7   20.06    1.07
   1  -1  -7   20.18    1.09
  -1   1   7   18.91    1.02
  -1  -1   7   20.84    1.01
   1   1  -7   18.90    1.11
  -6   0  -1    0.16    0.25
   6   0   1    0.26    0.40
   6   0   1    0.00    0.50
  -6   0  -1   -0.96    0.48
   2  -3  -3   12.36    0.81
  -2   3   3   12.86    0.78
  -2  -3   3   11.17    0.53
  -2  -3   3   12.86    0.78
  -2  -3   3   13.40    0.71
   2  -3  -3   11.84    0.85
   5  -2   0    5.03    0.40
  -5  -2   0    4.86    0.47
  -5   2   0    4.88    0.56
  -5   2   0    3.89    0.46
  -5  -2   0    4.10    0.51
   5  -2   0    5.46    0.64
   5  -2   0    4.43    0.61
   5  -2   0    4.64    0.46
   5   2   0    4.89    0.56
  -5  -2   0    5.36    0.56
   5   2   0    5.36    0.56
  -3   2   5    5.18    0.62
  -3  -2   5    5.44    0.66
  -3   2   5    5.66    0.64
  -3  -2   5    5.34    0.60
  -3   2   5    5.94    0.57
   3   2  -5    4.94    0.36
   3   2  -5    5.69    0.53
   3  -2  -5    4.97    0.61
   3  -2  -5    5.55    0.56
   3   2  -5    5.35    0.48
  -3  -2   5    4.58    0.57
  -3  -2   5    5.40    0.46
   3  -2  -5    5.14    0.64
  -3   2   5    4.74    0.40
   5   0   4    0.34    0.38
  -5   0  -4   -0.01    0.42
  -5   0  -4    0.02    0.36
   5   0   4    0.06    0.46
  -5   0  -4   -0.36    0.36
   5   0   4   -0.34    0.52
   3   3   1    3.54    0.25
  -3  -3  -1    3.80    0.44
   3  -3   1    3.08    0.50
   3  -3   1    3.22    0.55
   3  -3   1    3.31    0.43
   3  -3   1    3.77    0.55
   3  -3   1    3.97    0.34
  -3  -3  -1    3.25    0.57
  -3   3  -1    3.56    0.48
  -3  -3  -1    3.72    0.29
   3   3   1    4.26    0.65
   1   2  -6    7.35    0.68
   1   2  -6    5.91    0.40
  -1  -2   6    5.40    0.43
  -1   2   6    7.95    0.65
  -1  -2   6    6.14    0.51
  -1  -2   6    6.62    0.73
  -1  -2   6    6.50    0.59
  -1   2   6    5.62    0.61
   1   2  -6    7.44    0.61
   1  -2  -6    4.99    0.53
   1  -2  -6    7.79    0.79
  -1   2   6    7.83    0.76
  -1  -2   6    9.01    0.65
  -4  -1  -5   19.58    1.11
   4  -1   5   20.83    1.15
   4   1   5   19.73    1.00
   4  -1   5   19.20    1.07
  -4  -1  -5   20.04    1.04
   4  -1   5   17.88    0.99
  -4   1  -5   20.48    1.11
  -4  -1  -5   19.49    0.84
  -4   1  -5   20.34    1.11
  -4  -1  -5   18.03    0.95
   4   1   5   21.23    1.18
  -4   1  -5   20.52    1.02
   4  -1   5   19.37    1.02
  -5   2   1    0.97    0.38
  -5  -2   1    0.78    0.27
  -5  -2   1    1.01    0.40
   5   2  -1    0.93    0.40
  -5  -2   1    0.67    0.41
   5  -2  -1    1.14    0.37
   5  -2  -1    0.90    0.62
   5  -2  -1    0.78    0.53
  -5   2   1    0.51    0.42
   5   2  -1    0.69    0.39
   5  -1  -4    2.44    0.32
  -5   1   4    1.64    0.59
  -5  -1   4    1.52    0.50
   5  -1  -4    1.77    0.59
   5   1  -4    1.83    0.52
   5   1  -4    2.05    0.35
  -5   1   4    2.04    0.51
  -5  -1   4    2.22    0.31
  -5  -1   4    1.54    0.57
   5   1  -4    1.95    0.26
   3  -1   6    0.30    0.36
  -3   1  -6    0.40    0.46
  -3   1  -6    0.54    0.27
  -3  -1  -6    0.28    0.40
   3   1   6   -0.04    0.42
  -3  -1  -6    0.32    0.44
   3   1   6    0.40    0.14
  -3   1  -6    0.52    0.15
   3   1   6    0.37    0.32
   3  -1   6    0.70    0.58
   3   1   6    1.30    0.67
   3  -1   6    0.52    0.47
  -3  -1  -6    0.50    0.52
  -3  -1  -6    0.48    0.22
   6   0  -2    8.89    0.56
  -6   0   2    8.15    0.74
  -6   0   2    8.01    0.72
  -6   0   2    8.29    0.55
   6   0  -2    8.60    0.74
   2  -3   3   29.31    1.38
   2  -3   3   26.53    1.18
  -2  -3  -3   26.89    1.30
   2   3   3   25.50    1.32
  -2   3  -3   26.18    1.18
  -2  -3  -3   27.58    1.19
   2   3   3   25.72    1.08
  -2   3  -3   29.06    1.29
  -2  -3  -3   25.29    1.31
   2  -3   3   27.06    1.29
  -2  -3  -3   28.01    1.25
  -1  -1  -7    2.55    0.48
   1  -1   7    2.98    0.40
  -1   1  -7    2.84    0.30
  -1  -1  -7    3.15    0.61
   1   1   7    2.55    0.69
   1   1   7    2.58    0.31
   1  -1   7    2.40    0.39
  -1   1  -7    2.62    0.46
  -1  -1  -7    2.85    0.35
  -1   1  -7    3.05    0.54
   1  -1   7    3.17    0.63
   1   1   7    2.97    0.51
  -1  -1  -7    3.07    0.47
   1  -1   7    3.43    0.64
   4  -2  -4   28.16    1.31
   4   2  -4   26.73    1.27
   4   2  -4   26.32    1.26
  -4  -2   4   28.47    1.22
  -4   2   4   27.67    1.32
   4  -2  -4   28.47    1.42
  -4  -2   4   28.70    1.38
  -4  -2   4   25.25    1.25
   4   2  -4   27.99    1.20
  -4   2   4   27.23    1.36
   4  -2  -4   26.34    1.32
  -5  -2  -1    0.33    0.39
   5   2   1    0.55    0.48
   5   2   1    0.37    0.39
  -5  -2  -1    0.64    0.43
  -5  -2  -1    0.24    0.41
   5   2   1    0.76    0.38
  -5   2  -1    0.49    0.47
   5  -2   1    0.33    0.27
  -5   2  -1    0.57    0.38
   5  -2   1    0.55    0.60
   5  -2   1    0.46    0.29
   5  -2   1    0.39    0.48
  -1  -2  -6    4.95    0.68
   1  -2   6    4.72    0.43
   1   2   6    4.95    0.39
  -1   2  -6    4.56    0.52
  -1  -2  -6    5.41    0.56
   1  -2   6    5.27    0.63
   1  -2   6    5.31    0.64
   1   2   6    4.99    0.70
  -1   2  -6    5.48    0.38
   1  -2   6    4.30    0.83
   1  -2   6    5.37    0.42
   1   2   6    5.73    0.61
   0   3   4    0.82    0.30
   0  -3  -4    0.50    0.46
   0  -3   4    0.89    0.23
   0  -3   4    0.57    0.30
   0  -3   4    1.14    0.25
   0  -3  -4    0.31    0.56
   0   3   4    0.34    0.50
   0  -3  -4    0.55    0.58
   0   3  -4    0.36    0.15
   2   0   7    0.16    0.63
  -2   0  -7   -0.08    0.39
  -2   0  -7   -0.45    0.33
   2   0   7   -0.51    0.40
   2   0   7   -0.20    0.16
  -2   0  -7    0.20    0.37
   2   0   7    0.04    0.29
  -3   3   2    6.80    0.64
   3  -3  -2    7.16    0.64
  -3  -3   2    6.07    0.69
  -3  -3   2    6.95    0.40
   3   3  -2    7.25    0.85
   3  -3  -2    6.54    0.65
  -3   3   2    6.20    0.49
  -3  -3   2    7.06    0.63
   3  -3  -2    6.37    0.65
   3  -3  -2    5.81    0.57
   3   3  -2    6.82    0.49
  -3  -3   2    6.15    0.53
  -3   3   2    5.54    0.59
   4   0  -6    0.51    0.43
  -4   0   6    0.78    0.49
   4   0  -6    0.79    0.51
  -4   0   6    0.83    0.44
  -4   0   6    0.54    0.46
   4   0  -6    0.69    0.34
  -4   0   6    1.08    0.34
   6  -1   0   13.63    0.91
  -6  -1   0   12.40    0.64
  -6  -1   0   12.63    0.82
   6   1   0   13.97    0.89
  -6  -1   0   12.87    0.61
  -6   1   0   14.15    0.70
   6  -1   0   13.34    0.68
   6   1   0   13.49    0.77
  -6  -1   0   14.63    0.91
   6  -1   0   13.41    0.88
  -6   1   0   13.36    0.91
   6  -1   0   12.95    0.66
  -6   1   0   12.55    0.67
   6   1   0   12.80    0.81
  -1  -3   4    1.79    0.19
   1  -3  -4    1.06    0.54
  -1  -3   4    1.74    0.39
  -1  -3   4    1.31    0.42
  -1  -3   4    1.63    0.24
   1  -3  -4    1.67    0.26
  -1  -3   4    1.93    0.20
   1  -3  -4    2.15    0.57
  -1   3   4    1.77    0.51
   1  -3  -4    1.62    0.45
  -1   3   4    1.65    0.41
  -5  -2   2    2.69    0.46
  -5  -2   2    3.01    0.24
   5   2  -2    2.96    0.52
  -5  -2   2    2.83    0.27
   5  -2  -2    4.07    0.65
   5   2  -2    2.93    0.46
  -5   2   2    2.68    0.47
   5  -2  -2    2.71    0.40
  -5   2   2    2.45    0.51
   5   2  -2    2.53    0.39
   5  -2  -2    3.57    0.60
   5  -2  -2    3.01    0.40
  -5  -2   2    2.76    0.53
  -5   2   2    2.38    0.42
   6  -1  -1   32.31    1.55
  -6  -1   1   32.72    1.38
   6  -1  -1   31.08    1.33
   6   1  -1   30.79    1.38
  -6   1   1   32.22    1.56
  -6  -1   1   29.70    1.41
   6   1  -1   33.09    1.53
  -6  -1   1   30.96    1.49
   6  -1  -1   31.85    1.54
  -6   1   1   30.09    1.33
   6  -1  -1   31.60    1.36
   3   2   5    0.44    0.28
   3   2   5    0.17    0.14
  -3  -2  -5    0.01    0.20
   3  -2   5   -0.08    0.69
   3  -2   5    0.01    0.37
  -3   2  -5   -0.02    0.30
  -3  -2  -5   -0.19    0.51
   3  -2   5   -0.15    0.46
   3  -2   5   -0.02    0.44
  -3   2  -5    0.09    0.49
   3   2   5    0.32    0.39
   6   0   2   38.26    1.32
  -6   0  -2   34.90    0.99
   6   0   2   39.02    1.38
   6   0   2   38.80    1.39
  -6   0  -2   34.21    0.74
  -6   0  -2   34.90    0.92
  -6   0  -2   35.65    0.59
  -2   1   7   42.05    1.50
   2   1  -7   40.81    1.49
   2   1  -7   40.07    1.47
   2  -1  -7   41.27    1.32
   2  -1  -7   43.91    1.42
  -2   1   7   41.92    1.21
  -2   1   7   42.56    1.41
   2  -1  -7   41.87    1.50
  -2  -1   7   42.29    1.52
  -2   1   7   41.44    1.45
  -2  -1   7   42.12    1.52
   2   1  -7   41.75    1.43
  -3  -3  -2    2.18    0.38
   3  -3   2    2.76    0.53
  -3  -3  -2    1.63    0.55
  -3   3  -2    2.15    0.41
   3  -3   2    1.98    0.25
   3   3   2    2.77    0.57
   3  -3   2    2.57    0.44
   3  -3   2    2.08    0.41
   3   3   2    2.24    0.18
  -3  -3  -2    2.32    0.23
  -3   3  -2    2.15    0.41
   3   3   2    2.32    0.30
   1  -3   4    5.88    0.51
  -1  -3  -4    4.97    0.46
   1  -3   4    4.21    0.43
  -1   3  -4    4.34    0.33
  -1  -3  -4    4.85    0.72
   1  -3   4    4.76    0.44
   1   3   4    5.43    0.41
  -1   3  -4    6.22    0.43
  -1   3  -4    6.24    0.43
   1   3   4    4.03    0.52
  -1  -3  -4    4.65    0.58
   2   2  -6   89.68    2.71
  -2  -2   6   95.74    2.85
   2  -2  -6   93.34    2.66
  -2   2   6   95.66    2.79
   2  -2  -6   89.53    2.72
  -2  -2   6   93.97    2.77
   2  -2  -6   91.63    2.64
  -2   2   6   90.43    2.61
  -2  -2   6   95.16    2.62
   2   2  -6   89.49    2.61
  -2   2   6   93.30    2.77
   6  -1   1   26.69    1.37
   6   1   1   27.06    1.33
  -6  -1  -1   26.54    1.22
  -6   1  -1   24.65    1.12
  -6  -1  -1   25.82    1.31
   6   1   1   22.84    1.14
  -6   1  -1   23.80    1.24
   6   1   1   26.49    1.28
   6  -1   1   23.81    1.03
   6  -1   1   25.61    1.16
   6  -1   1   25.43    1.31
  -6   1  -1   26.60    1.17
  -6   1  -1   24.63    1.27
   4   2   4    3.68    0.44
  -4   2  -4    4.04    0.52
   4  -2   4    3.74    0.47
  -4   2  -4    3.71    0.51
  -4  -2  -4    4.30    0.50
   4  -2   4    3.90    0.57
  -4  -2  -4    4.45    0.51
  -4  -2  -4    3.73    0.63
   4  -2   4    4.32    0.35
   4  -2   4    3.56    0.61
   4  -2   4    4.22    0.43
   5  -1   4    7.77    0.65
  -5  -1  -4    8.04    0.64
  -5  -1  -4    7.72    0.66
  -5   1  -4    7.60    0.58
   5  -1   4    8.05    0.65
  -5  -1  -4    6.15    0.60
   5   1   4    8.63    0.71
  -5   1  -4    8.18    0.73
  -5  -1  -4    7.06    0.60
  -5   1  -4    7.76    0.61
   5  -1   4    7.60    0.73
   5   0  -5    0.07    0.42
  -5   0   5   -0.28    0.34
  -5   0   5    0.19    0.33
  -5   0   5   -0.26    0.44
   5   0  -5    0.08    0.27
  -5   0   5    0.39    0.51
   5   0  -5    0.19    0.43
   5  -2   2    5.86    0.49
   5   2   2    5.76    0.62
  -5  -2  -2    5.68    0.59
  -5   2  -2    6.14    0.66
   5  -2   2    6.04    0.66
  -5  -2  -2    5.56    0.58
   5  -2   2    5.41    0.56
   5  -2   2    7.13    0.71
   5   2   2    6.47    0.57
  -6   0   3   -0.35    0.52
   6   0  -3   -0.07    0.23
   6   0  -3   -0.15    0.20
  -6   0   3    0.17    0.53
   6   0  -3   -0.21    0.47
   6  -1  -2    7.71    0.54
  -6  -1   2   10.24    0.38
   6   1  -2   10.11    0.44
  -6  -1   2    9.23    0.78
  -6   1   2    6.92    0.55
   6  -1  -2    7.40    0.71
   6  -1  -2    8.87    0.56
   6  -1  -2   10.24    0.70
  -6   1   2    9.12    0.83
   6   1  -2    9.45    0.74
  -6  -1   2    7.58    0.70
  -6   1   2    9.15    0.76
   3   0  -7    9.45    0.80
  -3   0   7    9.14    0.65
  -3   0   7    8.25    0.74
   3   0  -7    8.80    0.68
   3   0  -7    9.84    0.48
  -3   0   7    9.11    0.76
  -3   0   7    8.91    0.60
   3   0  -7    8.71    0.76
  -2   1  -7    6.70    0.63
   2  -1   7    7.00    0.74
  -2   1  -7    7.39    0.67
   2   1   7    7.30    0.73
   2  -1   7    6.22    0.54
   2   1   7    6.50    0.42
  -2  -1  -7    7.20    0.73
  -2  -1  -7    6.93    0.53
   2   1   7    5.91    0.44
   2   1   7    6.47    0.60
  -2  -1  -7    8.19    0.65
   2  -1   7    7.38    0.61
  -2   1  -7    7.42    0.51
  -2  -1  -7    7.18    0.58
   2  -2   6    0.58    0.26
   2   2   6    0.20    0.52
  -2  -2  -6   -0.42    0.55
   2  -2   6    0.28    0.49
  -2   2  -6    0.42    0.36
   2   2   6    0.19    0.20
   2  -2   6    0.74    0.49
  -2   2  -6    0.16    0.43
   2   2   6    0.21    0.50
  -2   2  -6    0.46    0.17
  -2  -2  -6    0.39    0.29
   2  -2   6    0.68    0.41
  -2  -3   4    2.74    0.33
   2  -3  -4    2.33    0.45
  -2  -3   4    2.61    0.43
  -2   3   4    3.61    0.31
  -2  -3   4    2.21    0.22
   2  -3  -4    3.18    0.35
  -2  -3   4    2.60    0.17
   2  -3  -4    2.64    0.64
  -2   3   4    2.87    0.43
   2  -3  -4    2.71    0.48
   3   3  -3    1.39    0.27
   3  -3  -3    1.30    0.44
   3   3  -3    1.17    0.36
  -3   3   3    1.01    0.26
   3  -3  -3    1.62    0.47
   3  -3  -3    1.06    0.44
  -3  -3   3    1.02    0.39
  -3   3   3    0.94    0.44
  -3  -3   3    1.49    0.40
   3  -3  -3    1.21    0.39
  -3  -3   3    1.40    0.17
  -4  -1   6   41.61    1.30
  -4  -1   6   41.90    1.51
  -4   1   6   41.84    1.48
  -4  -1   6   41.85    1.41
   4   1  -6   41.22    1.41
   4   1  -6   42.15    1.27
   4  -1  -6   43.63    1.36
  -4  -1   6   40.28    1.44
   4   1  -6   40.21    1.42
   4   1  -6   41.53    1.48
   4  -1  -6   40.94    1.40
  -4   1   6   43.12    1.40
  -4   1   6   42.31    1.40
  -4   1   6   41.93    1.46
   4   0   6   15.27    0.86
  -4   0  -6   14.24    0.80
  -4   0  -6   13.38    0.82
   4   0   6   13.98    0.81
  -4   0  -6   13.29    0.79
  -4   0  -6   14.30    0.86
   4   0   6   13.75    0.90
  -4   0  -6   14.69    0.65
   5  -2  -3    0.21    0.34
  -5  -2   3    0.25    0.47
   5  -2  -3    0.63    0.52
   5   2  -3    0.41    0.30
   5   2  -3    0.38    0.37
  -5  -2   3    0.14    0.46
   5  -2  -3    0.76    0.43
  -5   2   3    0.36    0.39
   5  -2  -3   -0.23    0.39
  -5  -2   3   -0.01    0.22
   6  -1   2   46.73    1.60
  -6   1  -2   42.27    1.51
  -6   1  -2   44.64    1.58
   6   1   2   49.09    1.60
  -6  -1  -2   44.51    1.53
   6   1   2   44.99    1.51
  -6  -1  -2   45.42    1.46
  -6   1  -2   46.14    1.39
   6  -1   2   43.82    1.52
   6  -1   2   46.50    1.47
  -2   3  -4    4.77    0.43
   2  -3   4    4.49    0.52
  -2  -3  -4    4.58    0.43
   2   3   4    4.98    0.61
   2   3   4    4.85    0.35
  -2   3  -4    5.44    0.41
   2  -3   4    4.87    0.49
  -2   3  -4    4.51    0.36
   2  -3   4    4.44    0.44
  -2  -3  -4    4.51    0.65
  -2  -3  -4    5.25    0.56
  -3   3  -3   29.02    1.35
  -3  -3  -3   27.88    1.42
  -3   3  -3   29.13    1.34
   3   3   3   28.12    1.15
  -3  -3  -3   30.35    1.28
  -3  -3  -3   29.56    1.40
   3  -3   3   28.87    1.38
   3  -3   3   28.08    1.32
   3   3   3   29.34    1.26
   3  -3   3   30.32    1.45
   3  -3   3   27.14    1.20
   3   3   3   28.52    1.42
  -3  -3  -3   27.73    1.27
   6   0   3   -0.34    0.51
  -6   0  -3   -0.08    0.30
   6   0   3    0.23    0.46
  -6   0  -3   -0.31    0.45
   6   0   3   -0.01    0.39
  -6   0  -3   -0.47    0.41
   5   1  -5    0.58    0.42
   5  -1  -5    0.28    0.28
  -5  -1   5   -0.08    0.47
  -5   1   5    0.18    0.37
   5   1  -5    0.43    0.51
  -5   1   5    0.23    0.33
   5  -1  -5    0.04    0.41
   5   1  -5    0.36    0.22
  -5  -1   5    0.06    0.27
  -5  -1   5   -0.40    0.46
  -5   1   5    0.28    0.48
   5  -1  -5    0.44    0.58
   4  -3   0    5.44    0.63
  -4   3   0    5.07    0.56
   4  -3   0    5.43    0.55
  -4  -3   0    4.95    0.56
  -4  -3   0    5.87    0.61
   4   3   0    5.53    0.64
   4  -3   0    5.63    0.56
  -4   3   0    5.72    0.62
  -4  -3   0    5.61    0.34
   4  -3   0    5.41    0.49
  -4  -3   0    5.13    0.52
   0   0   8    6.79    0.61
   0   0  -8    6.12    0.53
   0   0  -8    6.60    0.51
   0   0  -8    7.08    0.68
   0   0   8    7.03    0.78
   0   0   8    6.30    0.57
  -5   0  -5    2.72    0.41
   5   0   5    3.20    0.46
   5   0   5    2.97    0.52
  -5   0  -5    2.98    0.44
  -5   0  -5    2.72    0.43
   5   0   5    3.16    0.44
   4  -3  -1    1.83    0.43
  -4   3   1    1.89    0.38
  -4  -3   1    1.73    0.40
   4  -3  -1    1.64    0.40
   4  -3  -1    1.55    0.39
  -4  -3   1    1.67    0.37
  -4  -3   1    1.69    0.16
   4  -3  -1    1.53    0.47
  -4   3   1    1.44    0.48
   4   3  -1    1.39    0.47
  -4  -3   1    1.98    0.41
   4   3  -1    2.18    0.35
   4  -2  -5    1.13    0.49
  -4   2   5    1.68    0.50
  -4   2   5    2.26    0.33
   4  -2  -5    0.66    0.37
   4   2  -5    0.72    0.19
   4  -2  -5    1.18    0.48
  -4  -2   5    1.85    0.47
  -4   2   5    1.42    0.44
   4   2  -5    1.83    0.45
  -4  -2   5    2.75    0.53
  -4  -2   5    0.85    0.28
   4   2  -5    2.43    0.40
  -3   0  -7    0.63    0.23
  -3   0  -7    0.90    0.37
   3   0   7    0.98    0.40
  -3   0  -7    0.86    0.40
   3   0   7    0.82    0.38
   3   0   7    0.73    0.54
  -3   0  -7    0.61    0.30
   6   1  -3   14.26    0.83
   6   1  -3   13.99    0.69
  -6  -1   3   13.02    0.83
  -6  -1   3   13.84    0.90
   6  -1  -3   13.82    0.96
   6   1  -3   12.37    0.60
   6   1  -3   14.41    0.91
   6  -1  -3   12.12    0.66
  -6   1   3   11.60    0.66
  -6   1   3   15.71    0.94
  -6   1   3   12.27    0.86
  -3  -1   7    0.39    0.44
  -3   1   7    0.77    0.47
  -3  -1   7    0.73    0.49
   3   1  -7    1.10    0.53
  -3  -1   7    1.11    0.35
  -3   1   7    0.81    0.53
  -3  -1   7    0.94    0.35
   3  -1  -7    0.56    0.33
  -3   1   7    0.93    0.25
  -3   1   7    0.91    0.47
   3   1  -7    0.57    0.40
   3  -1  -7    1.21    0.36
   3  -1  -7    1.25    0.47
   3   1  -7    0.93    0.43
  -1   0   8    0.04    0.36
   1   0  -8   -0.26    0.46
  -1   0   8   -0.48    0.55
   1   0  -8    0.13    0.22
   1   0  -8   -0.23    0.45
  -1   0   8   -0.09    0.42
  -5  -2  -3   25.87    1.25
   5   2   3   28.25    1.31
   5  -2   3   25.20    1.28
   5  -2   3   24.88    1.15
  -5  -2  -3   24.56    1.24
  -5   2  -3   25.84    1.31
   5   2   3   27.14    1.36
   5  -2   3   23.87    1.05
   5  -2   3   27.67    1.37
  -4  -3  -1    4.37    0.51
  -4  -3  -1    4.50    0.50
  -4  -3  -1    4.72    0.31
   4  -3   1    4.66    0.55
  -4  -3  -1    4.53    0.57
   4   3   1    4.41    0.62
  -4   3  -1    4.46    0.56
  -4   3  -1    3.70    0.46
   4  -3   1    3.64    0.46
   4  -3   1    4.69    0.38
   4  -3   1    4.67    0.55
   0  -3   5    0.74    0.30
   0  -3  -5    0.21    0.54
   0  -3   5    0.49    0.20
   0  -3   5    0.34    0.18
   0   3   5    0.44    0.44
   0  -3  -5   -0.03    0.47
   0   3   5    0.46    0.33
   0   3  -5    0.70    0.22
   0  -3   5    0.40    0.40
   3  -2  -6    3.10    0.46
   3   2  -6    2.49    0.54
   3   2  -6    2.65    0.43
  -3  -2   6    2.54    0.47
  -3   2   6    2.48    0.28
  -3  -2   6    3.14    0.35
   3  -2  -6    2.68    0.36
  -3   2   6    2.92    0.49
   3   2  -6    2.56    0.36
  -3   2   6    3.26    0.48
  -3   2   6    2.19    0.49
   3  -2  -6    2.83    0.57
  -3  -2   6    3.27    0.50
  -3  -2   6    2.27    0.48
  -1  -3   5   13.28    0.78
  -1  -3   5   13.60    0.61
   1  -3  -5   13.87    0.67
  -1  -3   5   14.03    0.66
   1  -3  -5   13.08    0.94
  -1   3   5   13.86    0.84
   1  -3  -5   14.51    0.84
  -1  -3   5   12.40    0.64
  -1  -3   5   12.95    0.94
  -1   3   5   13.78    0.76
   1  -3  -5   14.53    0.85
  -1  -3   5   13.54    0.65
   6   0  -4    1.49    0.35
   6   0  -4    1.96    0.26
   6   0  -4    1.61    0.47
   6   0  -4    1.63    0.47
  -6   0   4    0.84    0.48
  -6   0   4    1.32    0.52
   1   0   8    0.03    0.26
  -1   0  -8   -0.08    0.38
   1   0   8   -0.12    0.36
   1   0   8   -0.17    0.47
  -1   0  -8   -0.31    0.31
  -1   0  -8   -0.09    0.32
   4  -1   6    3.62    0.55
   4  -1   6    2.94    0.49
  -4  -1  -6    3.24    0.43
   4  -1   6    2.91    0.41
   4   1   6    3.06    0.47
   4  -1   6    2.39    0.68
  -4  -1  -6    2.93    0.46
  -4   1  -6    3.05    0.54
   4   1   6    2.90    0.37
  -4  -1  -6    3.93    0.56
  -4  -1  -6    3.13    0.26
  -4   1  -6    3.81    0.59
   4   1   6    2.38    0.55
   4   3  -2   11.54    0.79
   4  -3  -2   11.55    0.74
  -4  -3   2   12.77    0.56
   4  -3  -2   10.66    0.71
   4   3  -2   12.16    0.66
   4  -3  -2   11.27    0.76
  -4  -3   2   10.36    0.52
  -4  -3   2   11.92    0.76
  -4   3   2   11.62    0.68
   4  -3  -2   13.11    0.75
  -4   3   2   12.53    0.78
  -4  -3   2   10.67    0.63
   0  -2  -7    3.75    0.53
   0  -2   7    2.50    0.43
   0  -2  -7    3.03    0.60
   0   2  -7    3.13    0.31
   0   2   7    2.88    0.57
   0   2   7    3.04    0.49
   0   2  -7    3.26    0.52
   0  -2   7    3.31    0.34
   0  -2   7    3.07    0.57
   0  -2   7    2.50    0.38
   0   2   7    3.16    0.42
  -1   3  -5   18.52    0.84
  -1  -3  -5   17.67    1.05
   1  -3   5   17.64    0.95
  -1  -3  -5   16.86    0.97
   1   3   5   17.45    0.98
   1  -3   5   16.36    0.82
   1  -3   5   19.95    1.01
  -1   3  -5   16.39    0.73
   1   3   5   20.53    0.94
   1   2  -7    2.19    0.36
  -1   2   7    1.64    0.46
  -1  -2   7    2.47    0.30
   1   2  -7    2.12    0.24
   1  -2  -7    2.10    0.52
   1   2  -7    1.85    0.49
  -1  -2   7    2.11    0.55
   1  -2  -7    1.70    0.60
  -1  -2   7    1.71    0.39
   1  -2  -7    2.30    0.42
   1  -2  -7    1.77    0.22
  -1   2   7    1.90    0.54
  -1   2   7    2.05    0.40
  -6  -1  -3    6.11    0.63
   6  -1   3    5.26    0.62
  -6  -1  -3    5.62    0.57
   6  -1   3    5.90    0.60
  -6  -1  -3    6.42    0.61
   6   1   3    5.89    0.55
  -6   1  -3    6.24    0.63
   6   1   3    6.20    0.64
   6  -1   3    6.30    0.58
  -6   1  -3    6.17    0.47
   3  -3  -4    0.81    0.44
   3   3  -4    1.39    0.24
   3  -3  -4    1.41    0.58
  -3  -3   4    1.15    0.16
  -3   3   4    1.20    0.44
   3  -3  -4    1.11    0.52
  -3  -3   4    0.93    0.21
  -3  -3   4    1.30    0.44
   3  -3  -4    1.32    0.37
  -3   3   4    1.45    0.27
  -3  -3   4    1.49    0.37
  -2   0   8    1.51    0.50
  -2   0   8    1.86    0.50
   2   0  -8    1.98    0.53
   2   0  -8    1.73    0.50
  -2   0   8    2.20    0.43
   2   0  -8    1.49    0.37
   4   2   5   33.76    0.49
  -4  -2  -5   34.90    0.59
  -4   2  -5   33.73    0.96
  -4  -2  -5   31.08    1.51
   4   2   5   31.59    1.40
   4  -2   5   31.27    1.40
   4  -2   5   31.97    1.55
   4  -2   5   32.58    1.51
  -4   2  -5   35.25    0.94
   4  -2   5   32.90    1.55
   4   3   2    0.36    0.27
  -4   3  -2    0.78    0.39
   4  -3   2    0.32    0.41
   4  -3   2    0.21    0.21
   4  -3   2   -0.22    0.44
  -4   3  -2    0.29    0.39
  -4  -3  -2    0.16    0.15
   4   3   2    0.66    0.54
  -4  -3  -2   -0.15    0.49
  -4  -3  -2    0.04    0.37
  -5  -2   4   66.82    2.23
  -5   2   4   64.77    2.20
   5  -2  -4   60.15    1.95
  -5   2   4   66.62    2.17
   5   2  -4   66.17    2.12
   5  -2  -4   65.88    2.24
  -5  -2   4   62.10    1.92
  -5   2   4   67.02    2.20
  -5  -2   4   67.86    2.27
   5   2  -4   68.46    2.23
   5  -2  -4   62.11    2.11
   0   1  -8   23.73    1.20
   0  -1   8   23.45    1.18
   0  -1  -8   21.46    0.99
   0   1  -8   22.22    1.02
   0  -1   8   23.04    1.09
   0  -1   8   24.36    1.26
   0   1   8   23.45    1.13
   0   1   8   23.25    1.25
   0   1  -8   23.93    1.11
   0  -1  -8   25.22    1.26
   0   1   8   22.86    1.12
   5   1   5    1.21    0.56
  -5  -1  -5    1.11    0.46
   5  -1   5    1.01    0.43
   5   1   5    1.17    0.38
   5  -1   5    1.48    0.47
  -5   1  -5    1.09    0.46
  -5   1  -5    0.63    0.40
  -5  -1  -5    0.61    0.43
  -5  -1  -5    0.83    0.15
  -5  -1  -5    0.64    0.36
   5  -1   5    1.00    0.36
  -5   1  -5    0.99    0.44
  -3   1  -7   -0.07    0.47
  -3   1  -7   -0.03    0.23
  -3   1  -7   -0.03    0.26
   3  -1   7    0.18    0.35
   3   1   7    0.09    0.29
   3  -1   7    0.07    0.34
   3   1   7   -0.05    0.43
  -3  -1  -7   -0.42    0.37
   3  -1   7   -0.54    0.52
  -3  -1  -7   -0.12    0.49
   3   1   7   -0.35    0.55
   3   1   7   -0.10    0.14
  -3  -1  -7   -0.25    0.41
  -3  -1  -7   -0.07    0.23
  -3  -2  -6    2.21    0.30
  -3  -2  -6    1.40    0.45
   3   2   6    1.44    0.42
   3  -2   6    1.88    0.57
  -3   2  -6    2.02    0.37
   3  -2   6    2.08    0.45
  -3  -2  -6    1.74    0.56
   3   2   6    1.34    0.55
   3   2   6    2.06    0.29
   3   2   6    1.94    0.19
   3  -2   6    2.24    0.49
  -3   2  -6    2.31    0.43
   3  -2   6    1.42    0.28
   1   2   7   35.21    1.34
   1  -2   7   33.11    1.43
   1  -2   7   34.79    1.39
  -1  -2  -7   33.10    1.38
   1  -2   7   29.84    1.25
  -1  -2  -7   35.72    1.34
  -1   2  -7   31.39    1.22
  -1   2  -7   33.62    1.12
   1  -2   7   35.25    1.21
   1   2   7   34.82    1.44
   1   2   7   33.71    1.15
   1   1  -8    5.52    0.66
  -1  -1   8    5.54    0.67
  -1   1   8    5.98    0.73
  -1  -1   8    6.07    0.49
  -1   1   8    5.70    0.56
   1  -1  -8    5.59    0.61
   1   1  -8    5.48    0.58
  -1  -1   8    6.10    0.62
  -1   1   8    5.90    0.57
   1   1  -8    5.44    0.42
   1  -1  -8    5.88    0.40
   1   1  -8    6.35    0.57
   5   0  -6    0.27    0.45
  -5   0   6   -0.12    0.40
   5   0  -6    0.14    0.49
  -5   0   6   -0.13    0.33
   5   0  -6   -0.03    0.26
  -5   0   6   -0.08    0.33
  -5   0   6    0.41    0.51
   4   0  -7   -0.25    0.44
  -4   0   7   -0.35    0.41
   4   0  -7   -0.00    0.43
  -4   0   7   -0.17    0.31
   4   0  -7    0.14    0.28
  -4   0   7   -0.33    0.34
  -4   0   7   -0.21    0.45
   2  -3  -5    0.19    0.39
  -2   3   5   -0.55    0.37
  -2  -3   5   -0.06    0.27
   2  -3  -5    0.30    0.52
  -2  -3   5    0.14    0.12
   2  -3  -5    0.16    0.42
  -2  -3   5   -0.54    0.31
  -2   3   5    0.18    0.41
  -2  -3   5    0.20    0.19
  -6  -2   0    5.97    0.49
   6  -2   0    5.87    0.45
   6   2   0    5.80    0.55
  -6  -2   0    6.05    0.58
  -6   2   0    6.18    0.65
  -6   2   0    5.86    0.68
   6  -2   0    6.70    0.72
   6  -2   0    5.59    0.63
  -6   2   0    5.27    0.50
   6   2   0    6.08    0.62
   6  -2   0    5.72    0.42
  -6  -2   0    5.95    0.60
  -3  -3  -4   21.02    0.87
   3   3   4   21.02    0.81
   3   3   4   18.58    0.65
   3  -3   4   17.86    0.86
  -3   3  -4   18.34    0.80
  -3   3  -4   21.49    0.79
   3  -3   4   19.66    0.83
  -3  -3  -4   18.79    0.98
   3   3   4   19.52    1.02
  -3   3  -4   21.35    0.92
   3  -3   4   20.35    0.97
   6   1  -4   21.03    0.98
  -6   1   4   21.38    1.00
   6   1  -4   21.08    0.76
   6  -1  -4   22.10    1.05
   6  -1  -4   20.45    0.79
   6   1  -4   19.69    0.93
  -6   1   4   19.85    1.00
   6   1  -4   20.25    0.85
   6   1  -4   22.34    0.81
  -6  -1   4   19.95    0.96
  -6   1   4   20.08    0.84
  -6  -1   4   21.16    1.00
  -1   1  -8    1.33    0.52
  -1  -1  -8   -0.05    0.36
  -1  -1  -8   -0.18    0.25
  -1   1  -8    0.46    0.25
   1   1   8    0.17    0.39
  -1  -1  -8   -0.88    0.50
   1   1   8    0.77    0.54
   1   1   8   -0.03    0.25
  -1  -1  -8   -0.02    0.38
  -6   2   1    0.62    0.37
   6  -2  -1    0.46    0.31
   6   2  -1    0.67    0.36
   6  -2  -1    0.46    0.51
  -6  -2   1    0.34    0.39
   6   2  -1    0.43    0.40
  -6   2   1    1.08    0.49
   6  -2  -1   -0.14    0.45
  -6  -2   1    0.22    0.43
   6  -2  -1    0.39    0.23
  -6  -2   1    0.13    0.23
   6   0   4    5.76    0.60
   6   0   4    5.31    0.55
  -6   0  -4    5.58    0.54
  -6   0  -4    5.40    0.56
   6   0   4    5.62    0.59
  -2  -2   7   39.87    1.50
   2   2  -7   38.34    1.50
  -2  -2   7   37.51    1.46
   2  -2  -7   39.79    1.34
   2  -2  -7   34.77    1.27
  -2   2   7   35.18    1.31
   2   2  -7   36.92    1.37
  -2  -2   7   35.77    1.23
   2  -2  -7   38.84    1.49
  -2  -2   7   37.08    1.41
  -4  -3   3   64.89    2.16
   4   3  -3   67.16    2.32
  -4  -3   3   69.94    2.27
   4  -3  -3   68.61    2.30
  -4   3   3   68.06    2.14
   4  -3  -3   66.12    2.22
   0  -4   0    1.03    0.32
   0  -4   0    1.26    0.24
   0   4   0    1.12    0.38
   0  -4   0    0.39    0.42
   0  -4   0    0.82    0.49
  -2   0  -8   56.36    1.91
  -2   0  -8   64.37    2.15
   2   0   8   64.94    2.12
   2   0   8   59.50    2.09
  -2   0  -8   64.97    2.09
   2   0   8   59.83    1.83
   7   0   0    0.15    0.40
   7   0   0   -0.01    0.49
  -7   0   0    0.04    0.20
  -7   0   0   -0.33    0.54
  -7   0   0   -0.04    0.20
  -7   0   1   34.21    1.17
  -7   0   1   33.67    1.12
   7   0  -1   34.91    1.34
  -7   0   1   32.57    1.32
   7   0  -1   34.92    1.14
  -2   3  -5    0.87    0.28
  -2   3  -5    0.45    0.21
  -2  -3  -5    0.81    0.46
  -2   3  -5    0.22    0.19
   2  -3   5    0.37    0.42
   2   3   5    0.50    0.18
   2   3   5    0.51    0.43
   2  -3   5    0.39    0.18
  -2  -3  -5    0.61    0.52
   2  -3   5    0.42    0.34
  -2  -3  -5    0.85    0.28
   2  -3   5    0.65    0.33
   6  -2   1    1.40    0.51
   6  -2   1    1.37    0.28
   6  -2   1    1.63    0.50
  -6  -2  -1    1.00    0.41
  -6  -2  -1    1.34    0.37
  -6  -2  -1    1.24    0.49
   6   2   1    1.26    0.40
   6   2   1    1.28    0.39
   6   2   1    1.21    0.47
  -6   2  -1    1.42    0.36
  -6   2  -1    1.20    0.51
   6  -2   1    1.75    0.26
   0  -4  -1   -0.29    0.49
   0   4   1   -0.08    0.43
   0   4  -1    0.04    0.30
   0   4  -1   -0.16    0.17
   0  -4   1    0.04    0.33
   0  -4   1    0.09    0.23
   0  -4  -1    0.47    0.49
   0  -4  -1    0.18    0.31
   0  -4   1   -0.15    0.42
   0  -4  -1    0.17    0.22
  -5  -2  -4    7.00    0.64
  -5  -2  -4    8.23    0.46
  -5   2  -4    7.66    0.67
  -5  -2  -4    6.62    0.57
   5  -2   4    7.13    0.56
   5   2   4    7.89    0.59
  -5  -2  -4    7.39    0.61
   5  -2   4    7.20    0.67
  -5   2  -4    7.88    0.69
   5  -2   4    8.31    0.71
  -2   1   8    0.98    0.57
  -2  -1   8   -0.08    0.44
   2  -1  -8    0.23    0.28
   2   1  -8    0.15    0.59
   2   1  -8    0.03    0.39
   2  -1  -8    0.14    0.50
  -2  -1   8    0.29    0.30
  -2  -1   8    0.07    0.51
  -2   1   8   -0.09    0.39
   2  -1  -8   -0.39    0.38
   2   1  -8    0.47    0.53
  -2   1   8    0.19    0.43
   1  -4   0   21.05    0.80
  -1  -4   0   19.89    0.99
   1  -4   0   19.81    0.91
   1  -4   0   20.47    0.87
   1  -4   0   21.26    1.00
  -1  -4   0   21.25    0.82
  -1   4   0   19.64    0.84
   1   4   0   20.60    0.96
   6   2  -2    0.18    0.32
   6  -2  -2    0.14    0.53
   6   2  -2    0.18    0.37
   6  -2  -2    0.29    0.33
  -6   2   2   -0.03    0.37
  -6   2   2   -0.02    0.40
   6  -2  -2   -0.22    0.57
   6  -2  -2   -0.16    0.27
  -6  -2   2   -0.16    0.19
  -6  -2   2    0.68    0.47
  -6  -2   2   -0.10    0.40
   6   2  -2    0.12    0.36
  -7   0  -1    0.22    0.22
  -7   0  -1   -0.05    0.50
   7   0   1   -0.15    0.44
   7   0   1   -0.10    0.55
  -7   0  -1    0.36    0.23
  -1   4   1    1.69    0.42
  -1  -4   1    1.66    0.27
   1   4  -1    1.59    0.43
   1  -4  -1    1.32    0.53
   1  -4  -1    1.81    0.30
  -1  -4   1    1.51    0.48
   1  -4  -1    1.53    0.51
   1  -4  -1    1.93    0.40
  -4  -3  -3   -0.55    0.33
   4   3   3    0.28    0.27
  -4   3  -3   -0.30    0.18
   4  -3   3    0.17    0.28
  -4  -3  -3    0.17    0.50
   4   3   3    0.19    0.45
   4   3   3   -0.04    0.13
   4  -3   3    0.37    0.44
  -4   3  -3   -0.44    0.31
  -4   3  -3   -0.36    0.39
   4  -3   3    0.57    0.38
   4  -3   3    0.42    0.43
   1  -4   1    1.43    0.36
   1  -4   1    1.40    0.35
  -1  -4  -1    1.57    0.43
   1  -4   1    1.24    0.27
  -1  -4  -1    1.13    0.50
   1   4   1    0.99    0.46
   1  -4   1    1.17    0.46
  -1   4  -1    1.38    0.29
  -1  -4  -1    1.44    0.29
   1   4   1    1.29    0.21
   5  -1  -6    8.59    0.72
   5   1  -6    9.45    0.76
  -5  -1   6    8.90    0.75
   5   1  -6    9.05    0.74
  -5   1   6    9.12    0.76
  -5   1   6    9.29    0.68
  -5   1   6    9.73    0.70
   5  -1  -6   10.87    0.68
  -5  -1   6    9.49    0.62
   5   1  -6    9.22    0.56
   5   1  -6    9.56    0.72
  -5  -1   6    8.65    0.74
  -4   1   7   -0.02    0.50
  -4  -1   7    0.16    0.40
   4  -1  -7   -0.28    0.31
   4   1  -7    0.23    0.24
   4  -1  -7    0.44    0.57
  -4  -1   7   -0.02    0.27
  -4   1   7   -0.08    0.36
   4   1  -7   -0.01    0.44
  -4  -1   7   -0.34    0.46
  -4  -1   7   -0.00    0.37
   4   1  -7    0.14    0.40
   4   1  -7    0.73    0.46
  -4   1   7    0.07    0.44
   4  -1  -7    0.16    0.40
  -2   2  -7   11.09    0.79
  -2  -2  -7    9.60    0.67
   2   2   7   10.93    0.87
  -2  -2  -7   10.13    0.74
   2  -2   7   10.53    0.64
  -2   2  -7   10.60    0.59
   2   2   7   10.84    0.61
   2  -2   7   10.70    0.81
  -2  -2  -7   10.09    0.65
  -2  -2  -7   10.18    0.85
   2  -2   7   10.09    0.80
   2   2   7   10.86    0.78
  -2   2  -7   10.52    0.70
  -7   0   2    0.18    0.26
   7   0  -2   -0.30    0.44
   7   0  -2    0.23    0.20
  -7   0   2    0.34    0.50
   7   0  -2    0.45    0.26
  -7   0   2   -0.42    0.50
  -6   0   5    0.02    0.52
  -6   0   5   -0.07    0.52
   6   0  -5    0.03    0.36
   6   0  -5    0.20    0.42
   6   0  -5   -0.07    0.23
  -3   0   8    0.24    0.44
  -3   0   8   -0.04    0.18
   3   0  -8   -0.10    0.49
   3   0  -8   -0.37    0.27
   3   0  -8    0.32    0.37
  -3   0   8   -0.34    0.32
   3   0  -8   -0.17    0.50
  -3   0   8   -0.42    0.39
  -4  -2   6  138.02    4.07
  -4   2   6  136.96    4.21
   4   2  -6  135.71    3.96
  -4  -2   6  134.28    4.14
  -4   2   6  142.30    4.37
   4   2  -6  139.52    4.26
   4  -2  -6  138.65    4.15
   4  -2  -6  146.60    4.45
   4  -2  -6  143.79    4.45
  -4  -2   6  135.75    4.19
   4   2  -6  146.34    4.52
   4   2  -6  136.13    4.12
  -4   0  -7   -0.02    0.15
  -4   0  -7    0.05    0.33
  -4   0  -7   -0.52    0.44
   4   0   7    0.30    0.49
   4   0   7   -0.29    0.34
   4   0   7   -0.29    0.37
  -4   0  -7    0.28    0.40
  -4   0  -7    0.08    0.31
   0  -4   2    2.25    0.48
   0  -4  -2    1.92    0.22
   0  -4  -2    1.82    0.48
   0   4   2    2.40    0.29
   0  -4  -2    1.36    0.53
   0  -4   2    1.77    0.25
   0   4   2    2.19    0.46
   0  -4   2    2.07    0.33
   0   4  -2    2.13    0.23
   0  -4  -2    2.21    0.37
  -6  -1  -4   18.15    0.84
  -6  -1  -4   18.61    0.86
   6   1   4   18.59    0.86
  -6   1  -4   19.16    0.96
  -6   1  -4   18.50    0.77
   6  -1   4   18.79    0.89
  -6  -1  -4   16.67    0.86
   6  -1   4   18.68    0.94
   6   1   4   19.19    0.87
   6  -1   4   19.72    0.90
  -5   0  -6   -0.87    0.37
   5   0   6    0.30    0.48
  -5   0  -6   -0.24    0.43
   5   0   6    0.05    0.41
  -5   0  -6   -0.22    0.35
  -5   0  -6   -0.06    0.11
  -5   0  -6    0.14    0.34
   6  -2   2   38.85    1.50
  -6  -2  -2   41.00    1.48
   6   2   2   42.08    1.52
   6  -2   2   40.11    1.38
  -6   2  -2   38.62    1.49
   6   2   2   36.60    1.40
  -6  -2  -2   38.69    1.39
   6  -2   2   39.87    1.35
  -6   2  -2   36.91    1.26
   6  -2   2   38.56    1.49
   6   2   2   40.61    1.44
   2   1   8    0.21    0.52
   2   1   8    0.19    0.49
   2  -1   8    0.55    0.50
  -2  -1  -8   -0.33    0.33
  -2  -1  -8    0.22    0.33
  -2   1  -8    0.30    0.43
  -2   1  -8   -0.04    0.26
   2   1   8    0.05    0.20
  -2  -1  -8   -0.12    0.50
  -2   1  -8    0.57    0.40
   2   1   8    0.01    0.21
   2  -1   8    0.04    0.30
   2  -1   8    0.10    0.37
  -2  -1  -8    0.17    0.41
  -7   1   0    0.84    0.23
   7   1   0    1.60    0.42
   7  -1   0    1.11    0.54
   7   1   0    0.94    0.42
  -7   1   0    0.77    0.26
  -7  -1   0    0.70    0.51
  -7   1   0    0.62    0.46
   7  -1   0    0.86    0.27
  -7  -1   0    1.12    0.27
   7  -1   0    1.05    0.21
  -7  -1   0    1.07    0.20
   7  -1   0    1.22    0.53
   0  -3   6    0.53    0.46
   0  -3  -6    0.29    0.54
   0  -3   6    0.57    0.20
   0  -3   6    0.91    0.37
   0  -3   6    0.67    0.18
   0  -3  -6    1.06    0.46
   0   3   6    0.26    0.47
   0   3  -6    0.55    0.25
   0   3   6    0.78    0.30
   7  -1  -1    1.33    0.25
  -7  -1   1    1.13    0.23
  -7   1   1    1.78    0.49
   7  -1  -1    1.19    0.52
  -7  -1   1    2.00    0.53
   7  -1  -1    1.54    0.49
   7   1  -1    1.57    0.36
   7  -1  -1    1.23    0.24
  -7  -1   1    1.78    0.45
   7   1  -1    1.61    0.42
  -7   1   1    1.40    0.29
  -7  -1   1    1.69    0.26
   1   4  -2    2.47    0.33
  -1  -4   2    2.61    0.27
   1  -4  -2    2.89    0.48
  -1   4   2    2.57    0.33
   1   4  -2    2.83    0.21
  -1  -4   2    3.14    0.23
   1  -4  -2    2.49    0.57
  -1   4   2    2.93    0.49
   1  -4  -2    2.39    0.29
   1  -4  -2    2.88    0.49
  -1  -4   2    2.89    0.48
   5  -3   0    5.15    0.51
   5  -3   0    6.38    0.63
  -5  -3   0    6.49    0.57
   5  -3   0    6.28    0.51
   5  -3   0    6.63    0.45
  -5   3   0    6.69    0.63
   5  -3   0    6.66    0.65
  -5  -3   0    6.49    0.59
  -5  -3   0    7.24    0.60
   5   3   0    6.46    0.66
  -5  -3   0    6.39    0.37
  -5   3   0    6.11    0.60
  -3  -3   5   -0.16    0.28
  -3   3   5    0.43    0.41
  -3  -3   5    0.23    0.21
   3  -3  -5   -0.13    0.39
  -3  -3   5    0.21    0.34
  -3   3   5    0.04    0.20
   3  -3  -5    0.21    0.51
   3  -3  -5    0.05    0.50
   3   3  -5    0.54    0.21
  -3   3   5    0.71    0.45
  -5   2   5    1.34    0.39
  -5   2   5    0.72    0.49
   5  -2  -5   -0.08    0.51
  -5  -2   5    0.34    0.45
   5   2  -5    0.55    0.39
   5  -2  -5    0.45    0.35
  -5  -2   5    0.65    0.47
   5   2  -5    0.75    0.36
   5   2  -5    1.00    0.21
   5  -2  -5    0.68    0.48
   5   2  -5    0.24    0.19
   5   2  -5    0.21    0.38
   1  -3  -6   25.14    1.16
  -1  -3   6   21.13    0.95
  -1  -3   6   21.29    0.72
  -1  -3   6   26.15    1.28
  -1  -3   6   22.99    0.83
   1  -3  -6   21.20    0.93
  -1  -3   6   22.37    0.85
  -1   3   6   25.39    1.01
   1  -4   2   11.42    0.69
  -1  -4  -2   10.74    0.87
  -1  -4  -2   11.88    0.82
  -1  -4  -2   10.72    0.66
  -1   4  -2   10.71    0.62
   1  -4   2   10.51    0.73
   1  -4   2   10.57    0.69
   1   4   2   10.89    0.81
   1   4   2   10.46    0.59
  -7   0  -2   -0.12    0.47
  -7   0  -2   -0.29    0.45
   7   0   2    0.11    0.42
  -7   0  -2    0.63    0.26
   7   0   2   -0.00    0.49
   5  -3  -1    1.27    0.43
  -5   3   1    0.36    0.41
   5   3  -1    1.22    0.32
   5  -3  -1    0.11    0.37
  -5   3   1    1.28    0.42
  -5  -3   1    0.88    0.32
  -5  -3   1    0.72    0.14
   5  -3  -1    1.15    0.36
   5   3  -1    0.96    0.46
  -5  -3   1    0.28    0.37
   5  -3  -1    0.77    0.55
  -5  -3   1    1.07    0.38
   2  -4   0    6.18    0.52
   2  -4   0    4.40    0.50
  -2   4   0    4.28    0.37
  -2  -4   0    6.19    0.46
  -2  -4   0    5.40    0.39
   2  -4   0    5.40    0.61
   2  -4   0    2.97    0.43
  -2  -4   0    4.49    0.60
   2   4   0    5.08    0.54
   6   2  -3    2.42    0.33
  -6   2   3    3.02    0.39
   6  -2  -3    2.58    0.41
   6   2  -3    2.07    0.41
   6  -2  -3    2.18    0.50
  -6  -2   3    2.17    0.55
  -6  -2   3    2.87    0.51
   6  -2  -3    3.04    0.57
  -6   2   3    2.76    0.54
   6   2  -3    2.58    0.46
  -6  -2   3    2.26    0.25
  -6   2   3    2.01    0.43
   6  -2  -3    2.74    0.33
  -7   1  -1    2.55    0.54
  -7   1  -1    2.56    0.27
   7  -1   1    2.51    0.55
   7   1   1    2.89    0.48
   7   1   1    2.22    0.41
  -7  -1  -1    2.97    0.32
  -7   1  -1    2.20    0.60
  -7  -1  -1    2.97    0.53
   7  -1   1    2.50    0.49
   7   1   1    2.92    0.47
   7  -1   1    2.25    0.32
  -7   1  -1    3.14    0.31
  -7  -1  -1    2.62    0.21
   7  -1   1    3.01    0.23
  -3  -2   7   58.35    2.02
  -3   2   7   62.09    1.95
   3  -2  -7   63.19    2.21
  -3  -2   7   62.47    2.13
  -3   2   7   62.13    2.10
   3   2  -7   59.93    2.02
   3   2  -7   60.87    2.05
   3   2  -7   61.20    2.13
  -3   2   7   62.98    2.16
  -3   2   7   57.78    1.92
  -3  -2   7   60.88    1.93
  -3  -2   7   62.07    2.25
   3  -2  -7   59.12    1.94
  -4   3   4   17.72    0.74
  -4   3   4   17.32    0.82
   4  -3  -4   16.94    0.81
   4   3  -4   17.31    0.88
  -4  -3   4   16.09    0.77
   4  -3  -4   19.22    0.86
  -4   3   4   19.32    0.98
   4   3  -4   17.93    0.74
   4  -3  -4   18.18    0.92
   4   3  -4   18.33    0.85
  -4   3   4   18.42    0.86
  -4  -3   4   19.37    0.71
  -4  -3   4   18.21    0.86
   4  -3  -4   19.04    0.93
   2   4  -1   61.39    2.09
   2  -4  -1   59.95    1.92
  -2   4   1   57.33    1.91
  -2  -4   1   60.85    1.86
   2  -4  -1   58.89    1.97
   2  -4  -1   60.36    2.08
   2  -4  -1   56.85    1.92
  -2  -4   1   59.28    1.87
  -2  -4   1   55.00    1.95
  -5  -3  -1   54.08    1.86
  -5   3  -1   53.00    1.86
   5  -3   1   54.44    1.92
   5  -3   1   52.85    1.76
   5   3   1   49.00    1.77
  -5   3  -1   52.92    1.78
   5  -3   1   53.88    1.70
  -5  -3  -1   51.76    1.76
   5  -3   1   50.33    1.79
  -5  -3  -1   51.67    1.80
  -5  -3  -1   56.55    1.69
   1   3   6    0.47    0.23
  -1   3  -6    0.50    0.12
   1   3   6    0.34    0.43
   1  -3   6    0.46    0.21
   1  -3   6    0.51    0.27
  -1  -3  -6    1.13    0.54
  -1  -3  -6    0.41    0.47
  -1   3  -6    0.64    0.23
   1  -3   6    1.18    0.37
  -1   3  -6    1.01    0.21
   1  -3   6    0.62    0.44
  -2  -4  -1   -0.24    0.53
   2  -4   1    0.59    0.34
  -2  -4  -1   -0.10    0.25
   2   4   1   -0.01    0.48
   2  -4   1   -0.06    0.43
  -2   4  -1    0.37    0.28
   2  -4   1    0.23    0.36
   2   4   1    0.11    0.15
  -2  -4  -1    0.40    0.24
   2  -4   1   -0.22    0.34
  -2   4  -1    0.16    0.18
  -7   0   3    3.54    0.58
  -7   0   3    3.59    0.59
   7   0  -3    3.54    0.52
   7   0  -3    3.04    0.27
   7   0  -3    3.69    0.28
  -7   0   3    3.34    0.31
  -7  -1   2    2.50    0.28
   7  -1  -2    1.81    0.59
  -7  -1   2    2.49    0.57
   7   1  -2    2.03    0.30
   7  -1  -2    2.54    0.54
   7   1  -2    2.54    0.46
   7  -1  -2    2.80    0.27
  -7   1   2    2.49    0.34
  -7  -1   2    2.65    0.28
   7   1  -2    1.81    0.48
  -7   1   2    2.15    0.53
  -7  -1   2    2.21    0.52
   6  -1  -5    0.22    0.27
   6   1  -5   -0.13    0.20
  -6  -1   5   -0.13    0.25
   6   1  -5   -0.02    0.35
  -6   1   5   -0.25    0.37
  -6   1   5   -0.05    0.49
   6  -1  -5   -0.46    0.48
  -6  -1   5   -0.07    0.46
   6   1  -5    0.58    0.49
  -6  -1   5   -0.27    0.47
   6  -1  -5   -0.36    0.49
  -3   1   8    0.96    0.50
   3  -1  -8    0.57    0.35
  -3   1   8    0.56    0.40
   3   1  -8    1.13    0.42
  -3  -1   8    0.75    0.46
   3   1  -8    1.67    0.45
  -3  -1   8    0.98    0.29
   3  -1  -8    1.33    0.36
  -3  -1   8    0.84    0.31
   3   1  -8    0.82    0.52
  -3   1   8    0.78    0.47
  -3  -1   8    0.56    0.48
   3  -1  -8    0.57    0.49
  -3   1   8    1.13    0.21
  -3   0  -8    0.16    0.33
   3   0   8   -0.38    0.37
   3   0   8    0.24    0.53
  -3   0  -8   -0.02    0.28
   3   0   8    0.09    0.30
  -3   0  -8   -0.11    0.38
   3   0   8   -0.02    0.12
  -4   2  -6   41.22    1.56
   4   2   6   40.78    1.39
   4  -2   6   35.95    1.41
  -4   2  -6   40.10    1.40
   4  -2   6   40.99    1.52
   4  -2   6   40.80    1.53
  -4  -2  -6   41.54    1.36
  -4  -2  -6   38.23    1.49
  -4  -2  -6   40.79    1.47
   4   2   6   38.98    1.20
  -4  -1  -7   17.22    0.82
  -4   1  -7   16.30    0.70
  -4  -1  -7   13.91    0.71
  -4   1  -7   15.40    0.83
  -4  -1  -7   16.11    0.63
  -4  -1  -7   14.02    0.61
   4   1   7   14.76    0.77
   4   1   7   15.40    0.74
   4  -1   7   15.19    0.78
   4   1   7   16.10    0.77
   4  -1   7   15.46    0.75
   4  -1   7   14.36    0.71
  -5   3   2    0.32    0.37
   5  -3  -2    0.39    0.46
   5   3  -2    1.07    0.43
  -5   3   2    0.78    0.36
  -5  -3   2    0.73    0.24
   5   3  -2    0.75    0.32
  -5  -3   2    0.72    0.42
   5  -3  -2    0.12    0.37
  -5  -3   2    0.81    0.41
   5  -3  -2    0.95    0.40
   5  -3  -2    0.79    0.42
  -3   3  -5    2.62    0.41
   3  -3   5    2.13    0.37
   3   3   5    2.49    0.55
  -3  -3  -5    2.31    0.34
  -3   3  -5    1.94    0.24
  -3   3  -5    2.63    0.30
   3  -3   5    2.16    0.41
   3  -3   5    2.77    0.22
  -3  -3  -5    2.05    0.58
   3   3   5    2.49    0.20
   3  -3   5    2.66    0.48
   5  -1   6    0.81    0.47
   5   1   6    1.23    0.53
   5  -1   6    1.06    0.37
  -5   1  -6    1.44    0.46
  -5  -1  -6    1.04    0.41
  -5  -1  -6    1.38    0.37
  -5   1  -6    1.52    0.44
  -5   1  -6    1.56    0.51
  -5  -1  -6    1.32    0.17
   5  -1   6    1.22    0.53
   5   1   6    1.31    0.36
  -5  -1  -6    1.44    0.44
   0   4  -3   31.47    1.01
   0  -4  -3   31.44    1.32
   0  -4  -3   34.41    1.12
   0  -4   3   31.57    1.07
   0   4   3   33.13    1.12
   0  -4  -3   32.31    1.19
   0  -4   3   33.19    1.29
   0   4   3   33.31    1.33
   0  -4   3   32.38    1.12
   0  -4   3   32.24    1.08
   0  -4  -3   35.00    1.33
  -6   0  -5   -0.07    0.37
  -6   0  -5   -0.15    0.33
  -6   0  -5    0.28    0.33
   6   0   5   -0.42    0.44
   6   0   5   -0.43    0.40
   6   0   5   -0.30    0.34
  -2  -3   6    4.01    0.28
  -2  -3   6    3.84    0.37
   2  -3  -6    4.95    0.63
  -2  -3   6    4.67    0.63
  -2   3   6    4.22    0.55
  -2  -3   6    4.27    0.19
  -2   3   6    4.83    0.52
  -2   3   6    4.58    0.55
   2  -3  -6    4.17    0.47
  -2  -3   6    4.00    0.41
   2   4  -2    0.78    0.14
  -2  -4   2    0.79    0.26
   2  -4  -2    0.90    0.29
  -2   4   2    0.94    0.45
  -2   4   2    1.09    0.21
   2  -4  -2    1.08    0.46
   2  -4  -2    0.64    0.42
  -2   4   2    0.79    0.43
   2   4  -2    0.89    0.36
  -2  -4   2    0.68    0.45
   2  -4  -2    0.39    0.52
  -2  -4   2    0.89    0.19
   0   0   9   -0.03    0.51
   0   0   9   -0.01    0.40
   0   0  -9   -0.01    0.41
   0   0   9   -0.10    0.33
   0   0  -9   -0.30    0.28
   0   0  -9    0.36    0.60
   0   0  -9    0.17    0.28
  -4  -3  -4   -0.19    0.33
  -4  -3  -4   -0.43    0.55
   4   3   4    0.32    0.47
   4   3   4   -0.10    0.14
  -4   3  -4   -0.14    0.35
   4  -3   4   -0.06    0.35
   4   3   4    0.10    0.27
   4  -3   4    0.14    0.41
  -4   3  -4    0.24    0.21
  -4   3  -4    0.21    0.35
   4  -3   4   -0.11    0.26
   4  -3   4   -0.28    0.46
  -6  -2  -3    2.53    0.42
   6  -2   3    2.43    0.57
   6   2   3    3.05    0.51
  -6  -2  -3    1.99    0.45
   6  -2   3    2.66    0.50
  -6   2  -3    2.77    0.49
   6  -2   3    2.10    0.34
   6   2   3    2.13    0.40
  -7   1  -2    6.76    0.47
   7   1   2    6.78    0.59
  -7   1  -2    7.04    0.47
   7  -1   2    7.20    0.56
  -7  -1  -2    7.82    0.71
   7  -1   2    6.41    0.60
  -7  -1  -2    7.03    0.53
  -7   1  -2    6.81    0.66
   7   1   2    5.98    0.57
   7   1   2    7.61    0.64
   7  -1   2    7.43    0.73
  -7   1  -2    6.48    0.66
   1  -4  -3    1.33    0.41
   1  -4  -3    1.40    0.25
   1   4  -3    1.34    0.16
   1  -4  -3    0.98    0.50
  -1  -4   3    1.30    0.17
  -1  -4   3    1.06    0.19
   1  -4  -3    1.35    0.57
  -1   4   3    0.94    0.31
  -1  -4   3    1.29    0.22
  -1   4   3    1.37    0.48
  -1   0   9   11.65    0.86
   1   0  -9   11.73    0.74
   1   0  -9   15.15    0.90
   1   0  -9   13.73    0.92
  -1   0   9   13.68    0.89
   1   0  -9   14.16    0.49
  -1   0   9   11.63    0.79
   1   0  -9   12.06    0.70
   2   4   2    6.49    0.40
  -2  -4  -2    6.44    0.46
   2  -4   2    6.72    0.61
  -2   4  -2    6.67    0.43
   2  -4   2    6.50    0.54
   2   4   2    6.79    0.67
   2  -4   2    6.66    0.44
  -2   4  -2    6.20    0.45
  -2  -4  -2    5.98    0.59
  -2  -4  -2    6.45    0.48
   2  -4   2    6.55    0.55
  -2  -4  -2    6.34    0.67
   2  -4   2    6.05    0.52
   5   3   2   18.18    0.95
  -5  -3  -2   16.94    0.86
   5  -3   2   19.18    0.76
   5   3   2   18.86    0.78
   5  -3   2   17.61    0.89
  -5   3  -2   16.83    0.86
   5  -3   2   17.86    0.93
  -5  -3  -2   16.70    0.78
  -5  -3  -2   16.70    0.58
   5  -3   2   16.17    0.74
  -5  -3  -2   17.14    0.82
   0   2   8    0.07    0.31
   0   2   8   -0.07    0.43
   0  -2   8   -0.12    0.24
   0   2  -8   -0.02    0.19
   0   2  -8    0.06    0.27
   0  -2   8   -0.10    0.37
   0  -2  -8    0.03    0.40
   0   2  -8   -0.22    0.39
   0  -2   8   -0.27    0.45
   0  -2  -8   -0.67    0.52
   0   2   8   -0.38    0.52
  -5  -2  -5   22.08    0.94
  -5   2  -5   24.73    1.08
  -5  -2  -5   21.66    0.93
   5  -2   5   21.89    1.00
  -5   2  -5   24.22    1.08
  -5  -2  -5   21.69    0.76
  -5  -2  -5   23.59    1.06
   5  -2   5   23.66    1.00
   5   2   5   21.93    0.89
  -5  -2  -5   21.49    0.96
   5  -2   5   21.12    1.00
   5   0  -7  112.37    3.54
   5   0  -7  110.12    3.30
  -5   0   7  120.68    3.75
  -5   0   7  112.58    3.57
   5   0  -7  121.88    3.83
  -5   0   7  122.54    3.79
   5   0  -7  119.70    3.76
   3  -2   7   15.95    0.70
   3   2   7   15.50    0.68
   3   2   7   15.78    0.59
  -3  -2  -7   16.05    0.69
  -3   2  -7   15.16    0.73
   3   2   7   16.13    0.90
  -3  -2  -7   16.18    0.82
   3   2   7   16.77    0.83
  -3  -2  -7   14.58    0.58
   3  -2   7   17.19    0.91
  -3   2  -7   16.07    0.61
   3  -2   7   15.67    0.84
  -3  -2  -7   16.11    0.90
   1  -4   3    0.90    0.20
   1  -4   3    0.76    0.33
   1  -4   3    1.02    0.34
  -1  -4  -3    0.89    0.49
   1   4   3    0.92    0.55
  -1  -4  -3    0.93    0.33
   1   4   3    0.62    0.21
  -1   4  -3    0.76    0.20
   1  -4   3    0.51    0.26
  -1  -4  -3    0.37    0.46
  -1   2   8   -0.08    0.34
   1   2  -8    0.54    0.21
   1  -2  -8    0.65    0.43
  -1   2   8   -0.09    0.49
  -1  -2   8    0.27    0.39
   1  -2  -8    0.59    0.42
  -1  -2   8    0.74    0.26
   1   2  -8   -0.13    0.47
  -1   2   8    0.11    0.43
  -1  -2   8    0.23    0.48
   1   2  -8    0.40    0.32
   1  -2  -8    0.60    0.53
   1  -2  -8    0.29    0.18
  -7   0  -3   12.54    0.89
   7   0   3   14.17    0.70
  -7   0  -3   14.75    0.53
  -7   0  -3   14.13    0.65
   7   0   3   14.72    0.63
  -7   0  -3   14.36    0.37
   7   0   3   14.62    0.68
  -7  -1   3    7.91    0.67
  -7   1   3    8.31    0.58
  -7  -1   3    9.34    0.76
   7   1  -3    7.83    0.50
   7   1  -3    9.90    0.75
  -7   1   3    8.71    0.74
   7   1  -3   10.29    0.75
   7   1  -3    8.64    0.50
   7  -1  -3    8.93    0.55
  -7   1   3    8.88    0.79
   7  -1  -3    9.03    0.81
   2  -3   6    4.61    0.53
  -2   3  -6    4.83    0.43
  -2   3  -6    3.89    0.22
   2   3   6    4.23    0.49
  -2  -3  -6    4.67    0.64
  -2   3  -6    4.95    0.40
   2   3   6    4.75    0.35
  -2  -3  -6    4.81    0.44
   2  -3   6    3.89    0.42
   2  -3   6    4.52    0.54
   2  -3   6    4.17    0.29
   1   0   9    6.36    0.48
  -1   0  -9    6.39    0.61
  -1   0  -9    6.70    0.52
   1   0   9    6.69    0.58
  -1   0  -9    6.06    0.54
   1   0   9    5.99    0.67
  -3   1  -8    4.09    0.47
  -3  -1  -8    4.63    0.61
   3  -1   8    3.56    0.64
   3   1   8    4.47    0.60
  -3  -1  -8    4.30    0.46
   3   1   8    4.06    0.21
   3  -1   8    4.33    0.45
  -3  -1  -8    4.47    0.45
  -3   1  -8    4.00    0.39
  -3   1  -8    3.75    0.41
   3   1   8    3.69    0.32
  -3  -1  -8    3.92    0.35
   3  -1   8    3.83    0.42
  -3   1  -8    3.94    0.50
  -3   1  -8    4.66    0.40
   3   1   8    4.58    0.57
   6   2  -4    5.86    0.43
   6  -2  -4    6.63    0.69
   6   2  -4    6.48    0.55
  -6  -2   4    6.62    0.68
   6  -2  -4    5.92    0.57
  -6   2   4    6.57    0.67
  -6  -2   4    6.87    0.62
  -6   2   4    6.20    0.55
  -6  -2   4    7.04    0.47
   6  -2  -4    7.03    0.53
  -6   2   4    6.01    0.57
   1  -2   8    6.00    0.70
  -1   2  -8    5.90    0.57
   1  -2   8    5.50    0.59
  -1  -2  -8    6.00    0.58
   1  -2   8    6.08    0.60
  -1  -2  -8    5.93    0.71
  -1   2  -8    6.21    0.42
   1   2   8    5.80    0.70
   1  -2   8    5.37    0.37
   1   2   8    6.38    0.46
  -1  -2  -8    5.53    0.43
   1   2   8    5.62    0.59
   1  -2   8    6.45    0.47
   4   0  -8   11.50    0.69
   4   0  -8   12.18    0.83
   4   0  -8   12.12    0.88
  -4   0   8   11.48    0.82
  -4   0   8   13.29    0.80
  -4   0   8    9.91    0.66
   4   0  -8   11.47    0.84
  -4   0   8   11.94    0.87
  -5   3   3   10.72    0.80
   5  -3  -3   13.05    0.91
  -5   3   3   12.17    0.76
   5   3  -3   12.04    0.80
   5  -3  -3   11.17    0.79
   5  -3  -3   11.75    0.75
  -5  -3   3   12.39    0.67
   5   3  -3   12.69    0.76
  -5   3   3   11.36    0.79
  -5  -3   3   11.16    0.74
  -5  -3   3   11.81    0.65
   5  -3  -3   11.57    0.79
  -5  -3   3   11.88    0.81
   3   4   0    0.21    0.13
  -3  -4   0    0.27    0.19
  -3  -4   0    0.31    0.48
  -3   4   0    0.06    0.33
   3  -4   0   -0.28    0.41
   3   4   0   -0.08    0.41
   3  -4   0    0.32    0.35
  -3  -4   0    0.39    0.30
   3  -4   0    0.14    0.36
   3  -4   0    0.20    0.40
   7   0  -4    0.21    0.20
  -7   0   4    0.25    0.50
   7   0  -4   -0.57    0.49
   7   0  -4   -0.69    0.48
  -7   0   4    0.36    0.48
   7   0  -4   -0.35    0.30
   7   0  -4    0.08    0.23
  -7   0   4    0.08    0.29
   6   0  -6    0.93    0.27
  -6   0   6    1.01    0.58
   6   0  -6    0.53    0.40
   6   0  -6    1.16    0.43
  -6   0   6    1.49    0.46
  -2   0   9   -0.12    0.34
  -2   0   9    0.10    0.47
   2   0  -9   -0.18    0.55
  -2   0   9    0.11    0.41
   2   0  -9   -0.06    0.46
   2   0  -9    0.10    0.28
   6   1   5    2.27    0.52
   6  -1   5    2.53    0.46
  -6   1  -5    2.38    0.48
  -6   1  -5    1.85    0.34
   6  -1   5    2.44    0.50
  -6   1  -5    2.49    0.52
  -6  -1  -5    2.08    0.16
  -6  -1  -5    1.98    0.42
  -6  -1  -5    2.06    0.42
   6   1   5    3.13    0.44
  -6  -1  -5    2.04    0.39
   6  -1   5    2.24    0.38
  -6   1  -5    1.87    0.45
   3  -4  -1    3.79    0.43
   3  -4  -1    3.53    0.48
   3  -4  -1    3.03    0.47
  -3  -4   1    3.51    0.24
  -3   4   1    3.56    0.48
   3   4  -1    3.36    0.49
   3  -4  -1    4.20    0.51
  -3  -4   1    3.55    0.51
  -3  -4   1    3.55    0.37
   0   1   9    0.90    0.54
   0   1   9   -0.22    0.43
   0   1  -9    0.22    0.38
   0  -1   9    0.15    0.30
   0  -1  -9    0.15    0.43
   0   1   9   -0.04    0.32
   0  -1  -9    0.04    0.35
   0   1  -9    0.09    0.23
   0  -1  -9    0.44    0.25
   0   1  -9    0.59    0.53
   0  -1   9   -0.14    0.50
  -2   4   3    1.12    0.43
   2  -4  -3    1.89    0.28
   2   4  -3    1.88    0.17
   2  -4  -3    1.55    0.50
   2  -4  -3    0.96    0.46
  -2  -4   3    1.76    0.26
  -2  -4   3    1.77    0.55
  -2   4   3    1.66    0.36
  -2  -4   3    1.78    0.20
   2  -4  -3    2.11    0.45
  -3   4  -1    2.41    0.28
   3   4   1    1.67    0.51
  -3  -4  -1    2.70    0.39
   3  -4   1    2.68    0.41
  -3  -4  -1    1.82    0.24
   3  -4   1    1.95    0.44
  -3  -4  -1    1.66    0.52
   3  -4   1    2.27    0.41
  -3   4  -1    1.75    0.34
   3  -4   1    2.30    0.42
   3   4   1    2.35    0.17
  -1   1   9    1.37    0.43
   1   1  -9    1.24    0.40
   1  -1  -9    1.37    0.23
  -1   1   9    1.41    0.42
  -1  -1   9    1.18    0.42
  -1  -1   9    2.20    0.56
  -1   1   9    1.15    0.52
   1  -1  -9    1.43    0.45
  -1  -1   9    1.25    0.34
   1   1  -9    1.16    0.53
   1   1  -9    1.48    0.28
   1   1  -9    1.50    0.41
   2   2  -8   26.95    1.19
   2  -2  -8   26.11    1.19
  -2   2   8   28.07    1.13
   2  -2  -8   26.83    1.06
  -2   2   8   26.63    1.06
  -2  -2   8   24.53    1.08
   2   2  -8   26.32    0.92
  -2  -2   8   25.73    0.95
   2  -2  -8   26.52    0.98
   2   2  -8   26.00    1.06
  -2  -2   8   25.25    1.09
   2  -2  -8   25.30    1.08
   5  -1  -7    5.81    0.62
   5   1  -7    4.73    0.56
  -5   1   7    4.68    0.61
  -5  -1   7    4.42    0.56
   5   1  -7    4.43    0.49
   5   1  -7    4.54    0.38
   5   1  -7    5.92    0.61
  -5  -1   7    4.39    0.35
  -5  -1   7    5.27    0.56
  -5   1   7    3.74    0.44
   5  -1  -7    4.67    0.44
  -5   1   7    5.06    0.54
  -5   1   7    5.12    0.48
  -5  -1   7    5.11    0.48
  -4   3   5   32.31    1.12
   4   3  -5   31.03    1.17
  -4   3   5   29.42    1.18
   4   3  -5   29.87    1.16
   4  -3  -5   31.72    1.28
  -4   3   5   30.86    1.26
   4  -3  -5   30.37    1.26
  -4  -3   5   30.26    1.19
   4   3  -5   32.16    1.14
  -4  -3   5   31.18    1.20
  -4  -3   5   28.01    0.96
  -2   4  -3    4.54    0.39
   2  -4   3    3.08    0.36
  -2  -4  -3    3.95    0.53
   2   4   3    4.01    0.24
  -2  -4  -3    3.89    0.35
   2  -4   3    3.94    0.44
   2  -4   3    4.26    0.44
   2  -4   3    3.26    0.27
   2   4   3    3.68    0.57
  -2  -4  -3    4.38    0.34
  -2  -4  -3    5.03    0.58
  -2   4  -3    3.86    0.28
   5  -3   3    7.50    0.70
   5   3   3    7.49    0.75
  -5  -3  -3    7.73    0.69
   5  -3   3    7.52    0.52
   5  -3   3    7.26    0.73
  -5   3  -3    8.18    0.65
  -5  -3  -3    7.97    0.62
  -5   3  -3    7.29    0.63
   5   3   3    8.74    0.59
  -5   3  -3    9.06    0.55
   5  -3   3    6.25    0.58
  -7  -1  -3    7.86    0.58
   7   1   3    7.10    0.63
   7  -1   3    6.94    0.69
  -7   1  -3    7.52    0.67
  -7  -1  -3    7.16    0.60
   7  -1   3    7.44    0.60
  -7   1  -3    7.25    0.50
   7  -1   3    7.13    0.60
   7   1   3    7.00    0.60
  -7  -1  -3    7.33    0.71
   0  -4  -4    2.09    0.22
   0   4   4    2.34    0.29
   0  -4   4    1.30    0.23
   0  -4  -4    1.85    0.39
   0  -4   4    2.04    0.26
   0   4   4    2.45    0.48
   0   4  -4    2.14    0.18
   0  -4  -4    2.22    0.61
   0  -4  -4    3.34    0.54
   0  -4   4    1.50    0.31
   0  -4   4    1.74    0.24
   0   4   4    2.38    0.47
   5   2  -6    5.98    0.54
   5  -2  -6    5.83    0.62
  -5   2   6    4.84    0.60
  -5   2   6    5.35    0.47
  -5  -2   6    5.65    0.60
   5   2  -6    5.26    0.37
  -5   2   6    5.13    0.54
  -5  -2   6    5.29    0.57
   5  -2  -6    4.97    0.48
   5  -2  -6    4.94    0.66
  -5  -2   6    5.22    0.42
   5  -2  -6    5.62    0.55
   5   2  -6    5.21    0.52
   5   2  -6    5.92    0.58
  -4  -2   7   13.06    0.89
   4  -2  -7   12.52    0.79
  -4  -2   7   14.18    0.66
   4  -2  -7   15.42    0.78
  -4   2   7   11.74    0.79
   4   2  -7   13.53    0.83
  -4   2   7   13.53    0.95
  -4  -2   7   13.64    0.84
  -4   2   7   13.49    0.92
  -4   2   7   14.59    0.50
   4   2  -7   13.63    0.94
   4  -2  -7   12.41    0.90
  -4  -2   7   12.45    0.76
   4   2  -7   13.98    0.62
  -3   3   6   13.12    0.89
  -3  -3   6   15.79    0.63
   3  -3  -6   14.55    0.62
   3   3  -6   13.09    0.85
   3  -3  -6   14.44    0.70
  -3  -3   6   13.88    0.57
   3  -3  -6   16.40    0.92
  -3  -3   6   15.06    0.79
  -3   3   6   16.65    0.64
  -3   3   6   15.49    0.80
   3   3  -6   14.71    0.59
  -1   1  -9   38.77    1.50
   1  -1   9   35.70    1.37
   1  -1   9   36.87    1.31
   1   1   9   36.82    1.31
   1   1   9   36.10    1.33
  -1  -1  -9   38.38    1.46
  -1  -1  -9   36.84    1.32
  -1  -1  -9   38.82    1.40
   1  -1   9   36.96    1.45
  -1   1  -9   37.57    1.52
  -1   1  -9   37.27    1.27
  -3  -4   2   45.95    1.67
  -3   4   2   49.69    1.70
   3  -4  -2   47.00    1.68
  -3  -4   2   51.28    1.77
  -3   4   2   49.61    1.58
   3  -4  -2   46.22    1.68
  -3  -4   2   49.90    1.65
  -3  -4   2   49.14    1.51
   3   4  -2   49.23    1.76
   1  -4  -4    6.43    0.57
   1  -4  -4    6.52    0.66
   1   4  -4    6.83    0.38
  -1   4   4    7.01    0.85
  -1   4   4    6.97    0.67
  -1  -4   4    6.49    0.52
  -1  -4   4    8.01    0.75
  -1  -4   4    7.26    0.46
   1  -4  -4    6.46    0.42
   1  -4  -4    6.85    0.70
  -1  -4   4    7.40    0.44
   4   1  -8   15.13    0.83
  -4  -1   8   15.28    0.75
  -4  -1   8   12.31    0.74
  -4   1   8   11.85    0.79
  -4  -1   8   13.12    0.91
   4   1  -8   15.11    0.82
   4  -1  -8   14.95    0.77
   4  -1  -8   13.24    0.93
   4   1  -8   13.85    0.72
   4   1  -8   11.53    0.67
  -4  -1   8   13.84    0.67
  -4   1   8   13.61    0.91
  -4   1   8   14.61    0.71
   2   0   9   -0.22    0.38
  -2   0  -9    0.15    0.34
   2   0   9   -0.01    0.51
   2   0   9   -0.11    0.22
  -2   0  -9    0.27    0.34
  -2   0  -9    0.24    0.36
   2   0   9   -0.09    0.16
   6   2   4   11.56    0.86
   6  -2   4   11.32    0.73
   6   2   4   11.49    0.75
  -6  -2  -4   11.61    0.77
  -6   2  -4   10.95    0.82
   6  -2   4   10.82    0.84
  -6   2  -4   11.28    0.83
  -6  -2  -4   11.10    0.79
  -6  -2  -4   12.42    0.63
   6  -2   4   11.18    0.81
  -6  -2  -4   10.94    0.77
  -5   0  -7    2.16    0.36
   5   0   7    1.99    0.38
  -5   0  -7    2.33    0.47
   5   0   7    2.64    0.56
  -5   0  -7    2.08    0.46
  -5   0  -7    1.97    0.37
  -5   0  -7    2.02    0.17
   5   0   7    1.80    0.46
   3  -4   2    0.17    0.21
  -3  -4  -2    0.21    0.29
  -3  -4  -2    0.70    0.23
  -3  -4  -2    0.48    0.52
   3   4   2    0.34    0.15
  -3   4  -2    0.42    0.28
   3  -4   2    0.49    0.37
   3   4   2   -0.06    0.43
  -3   4  -2    0.52    0.30
   3  -4   2    0.69    0.46
   3  -4   2    0.15    0.33
   3  -4   2    0.25    0.36
   0  -3   7   12.15    0.80
   0   3   7   13.57    0.78
   0  -3   7   12.45    0.66
   0   3   7   12.36    0.92
   0  -3  -7   13.86    0.80
   0  -3  -7   12.02    0.82
   0   3   7   13.53    0.90
   0  -3   7   13.03    0.73
   0  -3   7   14.34    0.65
   0   3  -7   13.47    0.80
   0  -3   7   12.99    0.91
   0  -3  -7   13.57    0.87
   1  -4   4   22.53    0.89
   1  -4   4   22.68    0.91
  -1  -4  -4   21.19    1.04
   1  -4   4   20.16    0.83
  -1  -4  -4   19.82    0.94
  -1   4  -4   20.06    0.72
   1   4   4   22.79    0.81
   1  -4   4   20.81    0.81
  -1  -4  -4   21.53    0.87
   1   4   4   20.20    0.99
  -2   2  -8    0.18    0.39
  -2   2  -8    0.14    0.18
   2  -2   8    0.26    0.39
  -2  -2  -8   -0.09    0.32
  -2   2  -8    0.45    0.37
   2  -2   8   -0.01    0.50
   2   2   8   -0.75    0.50
   2   2   8    0.16    0.21
  -2  -2  -8    0.10    0.36
  -2  -2  -8    0.17    0.53
   2   2   8    0.15    0.44
  -2  -2  -8    0.22    0.40
   2  -2   8    0.03    0.23
   7   1  -4   12.32    0.89
  -7  -1   4   12.09    0.91
   7  -1  -4    9.50    0.76
   7   1  -4    9.72    0.57
  -7  -1   4    9.96    0.79
   7   1  -4    9.95    0.74
  -7   1   4    8.63    0.59
   7  -1  -4    8.39    0.54
   7   1  -4    9.30    0.54
  -7   1   4   12.33    0.86
  -7   1   4    9.31    0.79
  -6   1   6    0.25    0.33
  -6  -1   6    0.26    0.51
   6  -1  -6    0.09    0.28
  -6   1   6    0.09    0.48
   6  -1  -6    0.53    0.44
  -6  -1   6   -0.02    0.44
   6   1  -6    0.56    0.41
   6   1  -6    0.24    0.41
   6   1  -6    0.35    0.20
  -6  -1   6   -0.02    0.26
  -6   1   6    0.13    0.38
   7   2   0    6.00    0.58
   7  -2   0    4.96    0.38
  -7  -2   0    5.47    0.62
   7  -2   0    4.41    0.31
  -7   2   0    5.49    0.60
   7   2   0    5.56    0.58
  -7   2   0    4.65    0.46
  -7  -2   0    4.98    0.54
  -7  -2   0    5.11    0.44
   7  -2   0    4.90    0.62
   7  -2   0    6.13    0.68
  -7   2   0    5.55    0.62
   2   1  -9    5.86    0.58
   2   1  -9    6.67    0.68
   2   1  -9    5.20    0.41
  -2  -1   9    5.96    0.61
   2  -1  -9    5.52    0.44
  -2   1   9    6.65    0.64
  -2   1   9    6.08    0.68
   2  -1  -9    5.90    0.65
   2   1  -9    7.38    0.77
  -2  -1   9    5.57    0.51
  -2   1   9    5.28    0.53
  -2  -1   9    5.60    0.60
   7  -2  -1    7.16    0.71
  -7   2   1    6.76    0.55
  -7  -2   1    7.28    0.47
   7  -2  -1    6.44    0.46
  -7  -2   1    8.14    0.67
  -7   2   1    6.69    0.65
   7   2  -1    7.47    0.59
   7   2  -1    7.50    0.61
   7  -2  -1    7.37    0.48
   7  -2  -1    7.34    0.71
   7   2  -1    6.87    0.59
  -7  -2   1    8.26    0.72
  -1  -3   7   69.85    2.15
   1  -3  -7   71.27    2.45
  -1  -3   7   67.27    2.02
  -1  -3   7   69.65    2.36
   1  -3  -7   69.22    2.25
  -1  -3   7   66.76    2.26
   1   3  -7   65.03    2.12
  -1   3   7   70.90    2.27
  -1  -3   7   66.72    2.20
  -1   3   7   68.74    2.26
  -7   0  -4    0.18    0.32
   7   0   4   -0.18    0.45
   7   0   4    0.19    0.43
  -7   0  -4   -0.05    0.43
   7   0   4   -0.36    0.37
   4  -3   5    4.59    0.50
  -4  -3  -5    5.32    0.66
   4   3   5    3.83    0.57
   4   3   5    4.64    0.29
  -4   3  -5    5.29    0.51
   4  -3   5    4.20    0.26
   4  -3   5    5.08    0.61
  -4   3  -5    4.39    0.43
  -4  -3  -5    4.54    0.48
  -4  -3  -5    3.97    0.27
  -4   3  -5    5.37    0.40
   4   3   5    5.36    0.42
   4  -3   5    4.90    0.53
  -4   0  -8    2.29    0.43
  -4   0  -8    1.89    0.34
  -4   0  -8    2.23    0.25
  -4   0  -8    2.00    0.36
   4   0   8    1.86    0.38
   4   0   8    2.09    0.55
   4   0   8    1.99    0.44
   5  -3  -4    2.70    0.51
   5   3  -4    2.55    0.39
   5   3  -4    2.72    0.35
  -5   3   4    2.42    0.37
   5  -3  -4    1.81    0.52
  -5  -3   4    2.25    0.43
   5  -3  -4    2.06    0.43
   5   3  -4    1.90    0.39
  -5   3   4    2.39    0.51
  -5   3   4    1.92    0.38
  -5  -3   4    2.23    0.45
  -5  -3   4    1.60    0.21
   5  -3  -4    1.29    0.40
  -5   3   4    1.37    0.40
  -3   3  -6   15.45    0.63
   3  -3   6   15.55    0.78
   3  -3   6   14.88    0.77
  -3  -3  -6   14.79    0.76
   3   3   6   15.85    0.58
   3  -3   6   16.23    0.65
  -3  -3  -6   16.56    0.69
  -3   3  -6   16.10    0.66
  -3   3  -6   15.92    0.77
   3  -3   6   16.11    0.86
   7  -2   1   22.05    1.03
   7  -2   1   25.55    1.14
  -7   2  -1   23.29    1.10
   7   2   1   23.63    1.05
   7  -2   1   22.34    0.83
  -7  -2  -1   24.55    1.07
  -7   2  -1   21.28    0.89
   7   2   1   24.40    1.03
   7  -2   1   23.76    0.89
  -7  -2  -1   25.65    1.00
  -1   3  -7    4.92    0.42
   1  -3   7    4.15    0.32
  -1  -3  -7    4.59    0.64
   1   3   7    4.59    0.38
   1  -3   7    4.97    0.57
   1  -3   7    3.83    0.39
   1  -3   7    4.65    0.51
  -1   3  -7    5.01    0.37
   1  -3   7    4.14    0.31
  -1  -3  -7    5.39    0.53
   1   3   7    3.59    0.49
  -3   0   9   25.05    1.08
  -3   0   9   24.87    1.08
   3   0  -9   25.31    1.14
  -3   0   9   25.04    1.00
   3   0  -9   27.03    1.15
  -3   0   9   23.23    0.82
   3   0  -9   24.98    1.03
   7  -2  -2    1.79    0.26
   7   2  -2    2.13    0.47
   7  -2  -2    1.70    0.30
  -7   2   2    2.00    0.46
   7  -2  -2    1.88    0.51
  -7  -2   2    1.53    0.23
  -7  -2   2    1.96    0.47
   7   2  -2    1.79    0.43
   7  -2  -2    1.49    0.53
  -7   2   2    1.19    0.37
   7  -2  -2    1.65    0.34
  -7  -2   2    1.25    0.52
   7   2  -2    1.83    0.36
  -6   0  -6    5.97    0.55
   6   0   6    6.37    0.65
  -6   0  -6    6.06    0.64
   6   0   6    6.03    0.57
  -6   0  -6    5.72    0.52
   6   0   6    5.62    0.52
  -6   0  -6    6.48    0.56
  -2  -4   4  166.26    1.23
   2  -4  -4  158.62    4.86
   2  -4  -4  159.57    4.78
   2  -4  -4  154.59    4.65
  -2   4   4  161.93    1.63
  -2  -4   4  164.26    1.85
  -2   4   4  157.27    4.80
   6   2  -5    6.99    0.45
   6  -2  -5    5.59    0.50
   6  -2  -5    6.78    0.63
  -6   2   5    6.09    0.66
   6  -2  -5    5.83    0.62
  -6  -2   5    5.45    0.58
  -6   2   5    6.53    0.54
  -6   2   5    5.15    0.52
  -6   2   5    6.26    0.56
   6   2  -5    5.43    0.47
  -6  -2   5    5.62    0.62
   6   2  -5    7.01    0.57
   6   2  -5    5.80    0.37
  -6  -2   5    5.52    0.42
   3  -2  -8   12.23    0.91
  -3   2   8   12.49    0.88
   3  -2  -8   11.75    0.85
  -3  -2   8   10.90    0.82
   3   2  -8   12.57    0.83
  -3   2   8   12.11    0.83
   3  -2  -8   12.87    0.79
   3   2  -8   11.51    0.80
   3  -2  -8   10.76    0.73
  -3  -2   8   10.24    0.64
  -3  -2   8   11.62    0.82
  -3   2   8   13.39    0.73
  -3   2   8   10.42    0.74
  -3  -2   8   13.21    0.95
   3   2  -8   11.78    0.85
   3  -4  -3   22.61    0.98
   3  -4  -3   23.75    1.05
  -3  -4   3   23.66    1.00
   3   4  -3   21.83    0.95
  -3   4   3   22.24    0.95
  -3  -4   3   22.13    0.74
  -3  -4   3   20.22    0.92
  -3  -4   3   21.50    0.87
   3  -4  -3   22.43    0.91
  -3   4   3   21.56    0.78
  -3   4   3   21.78    0.94
   3  -4  -3   22.60    1.04
  -3   4   3   21.78    0.95
  -6  -3   0    8.23    0.44
  -6   3   0    7.51    0.70
  -6  -3   0    8.37    0.61
   6   3   0    8.26    0.59
  -6  -3   0    7.30    0.62
   6  -3   0    8.19    0.72
   6  -3   0    6.70    0.53
  -6   3   0    6.69    0.61
   6   3   0    7.20    0.66
  -6  -3   0    7.03    0.57
   6  -3   0    7.46    0.70
   6  -3   0    7.84    0.50
   4  -2   7   22.89    1.03
   4   2   7   20.71    0.70
   4  -2   7   23.53    1.05
  -4  -2  -7   20.85    0.94
   4  -2   7   19.74    0.83
  -4   2  -7   19.68    0.71
   4  -2   7   19.78    0.97
   4   2   7   20.07    0.86
   4   2   7   21.76    0.94
   4   2   7   20.01    1.03
  -4  -2  -7   19.78    0.79
   2  -1   9    7.46    0.72
  -2  -1  -9    8.34    0.63
  -2   1  -9    7.59    0.67
  -2  -1  -9    7.15    0.58
   2  -1   9    7.60    0.59
   2   1   9    7.21    0.45
  -2  -1  -9    6.65    0.57
   2  -1   9    7.34    0.55
  -2   1  -9    7.62    0.67
  -2  -1  -9    6.65    0.73
   2   1   9    7.54    0.76
  -2   1  -9    8.07    0.54
  -2   1  -9    7.36    0.62
   2   1   9    8.10    0.65
   7   0  -5    8.69    0.72
   7   0  -5    7.88    0.51
  -7   0   5    7.43    0.67
   7   0  -5    8.18    0.72
  -7   0   5    7.34    0.74
   7   0  -5    8.79    0.67
   6   3  -1   64.05    2.16
   6  -3  -1   63.86    2.06
  -6   3   1   61.47    2.05
   6  -3  -1   59.61    2.07
  -6  -3   1   63.97    2.04
  -6  -3   1   64.46    2.12
   6   3  -1   66.89    2.19
   6   3  -1   67.02    2.14
   6  -3  -1   68.26    2.14
  -6   3   1   62.33    2.13
   6  -3  -1   60.00    1.97
  -6  -3   1   65.57    2.17
   6  -3  -1   66.60    2.26
  -6   3   1   62.33    2.06
   5   2   6   25.09    0.99
  -5   2  -6   24.64    0.95
  -5  -2  -6   24.29    1.09
   5  -2   6   21.99    0.98
  -5  -2  -6   22.73    1.00
   5  -2   6   23.89    1.03
  -5   2  -6   26.30    1.14
   5  -2   6   24.19    1.14
  -5   2  -6   22.11    0.99
  -5  -2  -6   23.75    0.85
  -5  -2  -6   23.18    0.98
  -5  -1  -7    6.90    0.42
   5   1   7    7.89    0.76
  -5   1  -7    7.26    0.53
   5  -1   7    8.09    0.72
  -5  -1  -7    6.98    0.62
  -5  -1  -7    8.12    0.68
   5   1   7    8.22    0.62
  -5  -1  -7    8.73    0.71
  -5  -1  -7    6.90    0.58
  -5   1  -7    7.91    0.66
   5  -1   7    7.16    0.57
   5  -1   7    6.98    0.64
   5  -1   7    6.99    0.56
  -5   1  -7    7.29    0.68
  -2  -3   7    0.55    0.42
  -2   3   7    1.06    0.49
  -2  -3   7    0.90    0.13
  -2   3   7    1.09    0.41
  -2  -3   7    0.49    0.32
  -2  -3   7    0.75    0.33
  -2  -3   7    0.73    0.17
  -2  -3   7    0.82    0.23
   2  -3  -7    0.80    0.42
   2  -3  -7    1.12    0.26
  -2   3   7    0.66    0.46
   2  -3  -7    1.15    0.51
  -8   0   0   24.42    0.89
   8   0   0   25.52    1.13
   8   0   0   25.48    1.07
  -8   0   0   24.42    1.10
  -8   0   0   25.34    0.90
  -8   0   1    0.12    0.21
   8   0  -1    0.11    0.26
   8   0  -1    0.09    0.42
  -8   0   1   -0.14    0.20
   8   0  -1    0.30    0.16
  -8   0   1    0.04    0.51
   2  -4   4    3.60    0.39
  -2  -4  -4    2.92    0.54
  -2  -4  -4    3.70    0.35
  -2   4  -4    3.53    0.28
   2  -4   4    3.44    0.43
   2   4   4    3.82    0.24
  -2  -4  -4    4.47    0.54
  -2  -4  -4    3.53    0.33
   2   4   4    3.72    0.54
  -2   4  -4    3.37    0.27
   2  -4   4    3.39    0.31
   6  -3   1    3.71    0.30
  -6  -3  -1    4.50    0.52
  -6  -3  -1    3.64    0.42
   6   3   1    4.07    0.57
  -6  -3  -1    3.32    0.19
  -6   3  -1    2.50    0.42
  -6   3  -1    2.89    0.48
   6  -3   1    2.63    0.36
   6  -3   1    3.32    0.54
   6  -3   1    2.73    0.56
  -6  -3  -1    3.49    0.44
  -3  -4  -3   15.80    0.93
   3  -4   3   16.89    0.68
  -3  -4  -3   16.74    0.73
   3  -4   3   16.20    0.77
   3  -4   3   16.10    0.78
  -3  -4  -3   16.93    0.66
  -3   4  -3   18.09    0.75
  -3   4  -3   17.66    0.75
   3  -4   3   17.35    0.85
  -3  -4  -3   17.98    0.82
   3   4   3   16.78    0.60
   3   4   3   16.75    0.89
   5  -3   4   12.79    0.89
  -5   3  -4   11.95    0.67
  -5   3  -4   13.28    0.88
   5  -3   4   11.27    0.70
   5  -3   4   12.97    0.88
   5  -3   4   13.48    0.92
   5   3   4   12.65    0.75
  -5   3  -4   12.19    0.82
  -5  -3  -4   12.08    0.79
  -5  -3  -4   12.00    0.85
   5   3   4   11.68    0.87
  -4   4   0    5.15    0.53
  -4   4   0    3.95    0.41
  -4  -4   0    4.43    0.51
   4   4   0    5.09    0.40
   4  -4   0    4.81    0.54
  -4  -4   0    4.65    0.47
   4  -4   0    4.56    0.56
   4   4   0    5.48    0.60
   4  -4   0    4.61    0.49
   4  -4   0    4.29    0.47
  -4  -4   0    4.82    0.52
  -4  -4   0    5.14    0.34
  -7  -2  -2   41.09    1.54
   7  -2   2   41.05    1.40
   7   2   2   40.57    1.49
  -7   2  -2   41.74    1.39
   7   2   2   42.01    1.55
  -7  -2  -2   42.21    1.47
   7   2   2   41.44    1.47
   7  -2   2   41.28    1.33
   7  -2   2   41.65    1.59
   7  -2   2   41.20    1.57
  -7   2  -2   41.45    1.57
   7   1   4   16.32    0.80
  -7   1  -4   17.78    0.73
  -7  -1  -4   15.30    0.85
   7  -1   4   16.62    0.90
   7   1   4   17.13    0.82
  -7  -1  -4   17.09    0.78
  -7   1  -4   17.20    0.88
  -7  -1  -4   18.68    0.89
   7  -1   4   16.58    0.82
   4   1   8   14.46    0.79
  -4   1  -8   15.81    0.69
   4   1   8   14.69    0.32
   4   1   8   13.58    0.79
  -4   1  -8   17.15    0.66
  -4  -1  -8   16.18    0.67
   4   1   8   15.16    0.74
  -4   1  -8   13.55    0.91
  -4  -1  -8   15.70    0.87
  -4  -1  -8   14.44    0.62
  -4  -1  -8   15.21    0.74
   4  -1   8   14.07    0.61
   4  -1   8   14.81    0.75
   4  -1   8   14.83    0.62
  -4   4   1    1.58    0.44
  -4  -4   1    2.13    0.19
   4  -4  -1    1.77    0.47
   4  -4  -1    2.07    0.43
   4  -4  -1    1.41    0.44
  -4   4   1    2.18    0.47
  -4  -4   1    2.03    0.40
   4   4  -1    2.37    0.52
  -4  -4   1    2.04    0.42
   4   4  -1    3.34    0.29
  -4  -4   1    2.36    0.37
   4  -4  -1    2.70    0.42
  -8   0  -1   -0.19    0.43
   8   0   1    0.02    0.52
   8   0   1    0.21    0.38
  -8   0  -1    0.15    0.19
  -8   0  -1    0.20    0.23
  -8   0  -1   -0.34    0.47
  -6  -3   2   12.50    0.84
   6   3  -2   11.72    0.79
   6  -3  -2   11.39    0.87
  -6   3   2   10.30    0.74
   6  -3  -2   10.60    0.68
   6   3  -2   13.00    0.81
   6   3  -2   11.57    0.79
   6  -3  -2   12.88    0.88
  -6   3   2   12.84    0.83
   6  -3  -2   11.71    0.76
  -6  -3   2   13.19    0.85
  -6  -3   2   12.47    0.70
  -3  -1   9    6.25    0.51
  -3   1   9    6.51    0.41
   3  -1  -9    6.46    0.69
  -3   1   9    6.93    0.64
   3   1  -9    6.31    0.60
  -3   1   9    5.60    0.60
  -3  -1   9    5.98    0.40
   3   1  -9    6.10    0.68
   3  -1  -9    6.17    0.53
  -3  -1   9    5.97    0.65
   3   1  -9    5.95    0.56
  -3  -1   9    6.20    0.65
  -3   1   9    5.99    0.57
   3  -1  -9    6.86    0.56
   8   0  -2   23.57    1.04
  -8   0   2   21.49    1.03
  -8   0   2   20.73    0.79
  -8   0   2   21.63    1.03
   8   0  -2   22.39    0.83
   8   0  -2   20.60    0.74
  -4  -4  -1    5.64    0.37
   4   4   1    5.41    0.32
  -4   4  -1    5.14    0.50
  -4  -4  -1    6.00    0.51
  -4   4  -1    5.99    0.49
   4  -4   1    4.89    0.55
   4  -4   1    5.42    0.54
   4  -4   1    4.28    0.47
   4  -4   1    6.23    0.44
  -4  -4  -1    6.13    0.63
   4   4   1    6.26    0.65
   4  -4   1    5.12    0.48
   0  -4   5    0.53    0.23
   0  -4  -5    1.19    0.53
   0  -4   5    1.01    0.21
   0  -4  -5    0.67    0.50
   0   4   5    0.83    0.37
   0  -4  -5    0.66    0.20
   0   4  -5    0.91    0.13
   0  -4  -5    0.59    0.38
   0  -4   5    0.55    0.29
   0   4   5    1.11    0.48
   0   4   5    1.06    0.25
   7   2  -3    4.32    0.48
  -7   2   3    3.90    0.57
  -7  -2   3    3.32    0.48
   7  -2  -3    3.61    0.60
   7   2  -3    4.65    0.43
   7  -2  -3    4.33    0.41
   7   2  -3    4.22    0.47
  -7  -2   3    4.01    0.54
   7  -2  -3    4.78    0.60
   7  -2  -3    3.61    0.31
  -7   2   3    3.60    0.44
  -7   2   3    3.85    0.51
   2  -3   7    1.87    0.46
   2   3   7    1.93    0.23
   2  -3   7    2.05    0.39
  -2  -3  -7    2.07    0.36
   2  -3   7    2.43    0.44
  -2  -3  -7    1.41    0.51
   2   3   7    2.77    0.46
  -2   3  -7    1.94    0.30
   2  -3   7    1.82    0.25
  -2   3  -7    1.87    0.33
   5   0  -8    0.25    0.43
   5   0  -8   -0.24    0.46
  -5   0   8   -0.93    0.45
  -5   0   8   -0.15    0.32
   5   0  -8    0.48    0.38
   5   0  -8   -0.12    0.21
  -5   0   8   -0.05    0.38
  -6  -1  -6   23.02    0.76
  -6  -1  -6   19.71    0.87
   6  -1   6   19.86    0.90
   6   1   6   21.62    0.93
  -6  -1  -6   21.77    0.97
  -6   1  -6   21.25    0.97
   6  -1   6   21.45    1.01
  -6   1  -6   22.63    0.98
  -6   1  -6   19.55    0.95
   6  -1   6   21.33    0.99
   6   1   6   19.57    0.97
  -6  -1  -6   21.65    0.92
  -3   0  -9    2.91    0.41
  -3   0  -9    3.13    0.46
   3   0   9    2.57    0.34
   3   0   9    2.79    0.59
   3   0   9    2.68    0.16
  -3   0  -9    2.54    0.39
   3   0   9    2.37    0.41
   4  -3  -6    5.79    0.61
   4   3  -6    5.88    0.44
  -4   3   6    5.55    0.60
  -4   3   6    5.60    0.55
   4  -3  -6    6.67    0.59
  -4  -3   6    6.41    0.43
  -4   3   6    4.92    0.39
  -4  -3   6    5.65    0.58
   4   3  -6    5.68    0.52
   4  -3  -6    5.53    0.66
   4   3  -6    5.98    0.43
  -4  -3   6    5.21    0.54
   1  -4  -5    9.33    0.81
  -1   4   5    8.70    0.59
  -1  -4   5    7.97    0.68
  -1  -4   5    9.11    0.64
  -1  -4   5    9.13    0.54
  -1  -4   5    8.27    0.69
  -1   4   5   10.03    0.77
  -1  -4   5    9.67    0.55
   1  -4  -5    9.48    0.71
   1  -4  -5   11.53    0.83
  -1   4   5    8.62    0.67
  -1  -4   5    8.95    0.52
   1  -4  -5    9.09    0.54
   3  -2   8   -0.02    0.44
  -3   2  -8   -0.09    0.30
   3   2   8   -0.04    0.41
   3   2   8   -0.50    0.39
   3   2   8    0.04    0.22
  -3  -2  -8    0.13    0.32
  -3   2  -8    0.31    0.41
  -3   2  -8    0.03    0.17
   3  -2   8   -0.02    0.24
  -3  -2  -8   -0.17    0.41
   3  -2   8   -0.33    0.36
  -3  -2  -8    0.31    0.31
   3   2   8   -0.07    0.13
  -3  -2  -8    0.68    0.52
   6   0  -7    0.72    0.49
  -6   0   7   -0.33    0.52
   6   0  -7   -0.17    0.43
   6   0  -7   -0.52    0.41
  -6   0   7   -0.47    0.31
   6   0  -7   -0.03    0.26
  -6   0   7    0.02    0.39
   7  -1  -5    1.83    0.29
   7   1  -5    2.31    0.26
  -7   1   5    2.10    0.36
   7  -1  -5    2.45    0.57
  -7  -1   5    1.75    0.52
  -7  -1   5    2.26    0.56
  -7   1   5    2.15    0.46
   7   1  -5    2.08    0.33
   7   1  -5    1.94    0.52
   7   1  -5    2.14    0.24
   7  -1  -5    2.18    0.53
  -7   1   5    3.02    0.59
   4  -4  -2    3.53    0.44
   4  -4  -2    3.03    0.45
  -4   4   2    2.93    0.30
  -4  -4   2    3.54    0.39
   4   4  -2    4.33    0.31
  -4  -4   2    3.64    0.21
   4  -4  -2    3.34    0.52
  -4   4   2    3.36    0.50
  -4  -4   2    3.81    0.43
   4   4  -2    4.02    0.51
  -4  -4   2    3.40    0.40
   4  -4  -2    3.34    0.48
  -6   3  -2   -0.16    0.47
  -6  -3  -2    0.52    0.40
  -6   3  -2    0.18    0.30
  -6  -3  -2    0.44    0.38
   6  -3   2    0.94    0.51
   6   3   2    0.53    0.45
   6  -3   2    0.34    0.26
   6  -3   2    0.26    0.47
  -6  -3  -2    0.43    0.38
   6  -3   2    0.02    0.29
  -8  -1   0   42.32    1.35
   8   1   0   44.03    1.58
  -8   1   0   42.02    1.60
   8  -1   0   38.48    1.34
  -8  -1   0   42.36    1.40
   8  -1   0   38.24    1.46
  -8  -1   0   41.12    1.55
  -8   1   0   40.52    1.36
  -8   1   0   42.46    1.44
  -8   1   0   43.64    1.65
   8  -1   0   42.49    1.36
   8  -1   0   42.61    1.60
  -8  -1   1    5.47    0.40
   8  -1  -1    4.91    0.36
  -8   1   1    5.51    0.64
   8  -1  -1    5.18    0.65
  -8  -1   1    5.18    0.39
   8   1  -1    5.06    0.45
   8  -1  -1    5.63    0.62
  -8  -1   1    5.70    0.59
   8   1  -1    6.01    0.58
  -8  -1   1    5.99    0.64
  -8   1   1    5.08    0.43
  -1  -4  -5   17.20    0.88
   1  -4   5   15.23    0.70
   1   4   5   16.69    0.89
   1  -4   5   17.05    0.76
   1   4   5   17.02    0.66
   1  -4   5   16.90    0.73
  -1   4  -5   18.24    0.66
   1   4   5   18.59    0.86
  -1   4  -5   16.66    0.60
  -1  -4  -5   16.29    0.74
  -1  -4  -5   16.37    0.93
   6  -2   5   16.07    0.82
  -6  -2  -5   17.59    0.85
  -6   2  -5   16.34    0.84
  -6  -2  -5   16.55    0.60
  -6  -2  -5   16.71    0.85
   6  -2   5   14.90    0.74
   6   2   5   16.19    0.73
   6  -2   5   17.51    0.92
  -6   2  -5   18.74    0.94
  -6  -2  -5   16.69    0.79
  -6  -2  -5   15.12    0.76
   0  -2   9   -0.01    0.29
   0  -2  -9    0.14    0.21
   0   2  -9    0.47    0.40
   0  -2  -9   -0.48    0.52
   0   2  -9    0.15    0.19
   0   2   9   -0.01    0.44
   0  -2   9    0.28    0.38
   0   2  -9    0.13    0.28
   0   2   9    0.68    0.55
   0   2   9    0.34    0.29
   0  -2  -9    0.20    0.39
   0  -2   9    0.22    0.45
  -8   0  -2    0.25    0.50
  -8   0  -2    0.10    0.17
   8   0   2    0.05    0.37
  -8   0  -2    0.45    0.44
  -8   0  -2   -0.02    0.20
   8   0   2    0.35    0.47
  -5   3   5   17.84    0.83
  -5   3   5   16.50    0.84
   5  -3  -5   16.80    0.89
  -5  -3   5   16.65    0.82
   5   3  -5   17.00    0.74
   5   3  -5   16.61    0.79
  -5   3   5   16.48    0.81
   5  -3  -5   16.82    0.78
  -5  -3   5   17.43    0.67
  -5   3   5   15.32    0.66
  -5  -3   5   15.93    0.81
   5   3  -5   17.65    0.77
   5  -3  -5   16.56    0.88
   3  -4  -4    0.36    0.42
   3  -4  -4    2.17    0.36
  -3   4   4    0.65    0.45
   3  -4  -4    0.68    0.46
  -3   4   4    1.34    0.42
  -3  -4   4    1.09    0.41
  -3  -4   4    1.28    0.16
  -3   4   4    0.41    0.42
  -3   4   4    1.73    0.24
  -3  -4   4    2.03    0.33
   3  -4  -4    1.12    0.50
  -1  -2   9    9.06    0.76
  -1   2   9    6.38    0.65
  -1  -2   9    8.06    0.67
   1  -2  -9    7.09    0.64
   1  -2  -9    8.66    0.80
   1   2  -9    8.09    0.50
   1   2  -9    7.44    0.58
   1  -2  -9    7.48    0.47
  -1   2   9    7.78    0.60
  -1   2   9    7.73    0.66
  -1  -2   9    8.27    0.56
   1   2  -9    8.95    0.73
  -4  -4  -2    1.20    0.44
  -4   4  -2    0.88    0.35
   4   4   2    0.69    0.50
   4  -4   2    0.94    0.38
   4  -4   2    0.92    0.31
   4   4   2    0.70    0.13
  -4  -4  -2    0.93    0.17
   4  -4   2    1.18    0.22
  -4   4  -2    1.09    0.35
   4  -4   2    1.12    0.41
  -4  -4  -2    1.01    0.34
   4  -4   2    1.19    0.42
  -8   1  -1    2.27    0.52
   8   1   1    1.77    0.38
  -8  -1  -1    1.78    0.29
   8  -1   1    2.00    0.47
  -8   1  -1    2.18    0.27
   8   1   1    2.58    0.47
   8  -1   1    2.91    0.35
   8  -1   1    2.63    0.60
  -8   1  -1    1.87    0.54
  -8  -1  -1    1.80    0.20
  -8   1  -1    2.06    0.27
   8   1   1    1.98    0.43
  -8  -1  -1    2.46    0.56
   5  -2  -7    1.32    0.44
  -5  -2   7    0.30    0.44
  -5   2   7    0.96    0.49
  -5   2   7    0.46    0.42
   5   2  -7    0.83    0.36
   5   2  -7    0.76    0.41
   5   2  -7    0.97    0.42
  -5  -2   7    0.90    0.27
   5   2  -7    0.77    0.21
  -5  -2   7    1.11    0.46
  -5   2   7    0.61    0.29
   5  -2  -7    0.42    0.31
   6  -3  -3   28.97    1.16
   6   3  -3   32.78    1.20
   6  -3  -3   31.64    1.30
  -6  -3   3   31.05    1.22
  -6  -3   3   28.44    0.96
  -6   3   3   30.86    1.21
   6   3  -3   31.64    1.23
  -6  -3   3   32.91    1.26
   6  -3  -3   27.43    1.11
   0   0 -10   50.29    1.71
   0   0 -10   52.07    1.70
   0   0  10   48.08    1.67
   0   0  10   53.26    1.79
   0   0 -10   51.63    1.89
   0   0  10   50.40    1.86
   0   0 -10   53.58    1.90
   7   0   5   78.92    2.59
  -7   0  -5   78.28    2.58
   7   0   5   70.54    2.40
   7   0   5   77.31    2.56
  -7   0  -5   77.80    2.48
   8   0  -3   -0.05    0.18
  -8   0   3   -0.46    0.50
  -8   0   3    0.22    0.24
   8   0  -3    0.12    0.50
   8   0  -3   -0.38    0.43
   8   0  -3    0.13    0.21
  -8   0   3   -0.27    0.50
  -3  -3   7    2.29    0.38
   3  -3  -7    2.49    0.44
   3  -3  -7    3.48    0.60
  -3   3   7    2.73    0.23
  -3  -3   7    2.71    0.39
  -3   3   7    3.17    0.47
  -3  -3   7    3.24    0.30
  -3   3   7    2.95    0.49
  -3   3   7    3.62    0.51
  -3  -3   7    3.17    0.59
   3  -3  -7    2.70    0.35
   3   3  -7    2.76    0.38
   8  -1  -2   13.01    0.72
   8   1  -2   14.57    0.69
  -8  -1   2   14.50    0.71
  -8  -1   2   13.05    0.71
   8   1  -2   14.74    0.53
   8  -1  -2   14.07    0.71
  -8   1   2   13.32    0.76
  -8  -1   2   13.74    0.91
  -8   1   2   13.57    0.90
   8   1  -2   14.77    0.65
  -8  -1   2   12.86    0.71
   1   0 -10    0.13    0.20
   1   0 -10   -0.06    0.50
   1   0 -10   -0.10    0.29
   1   0 -10   -0.06    0.20
  -1   0  10   -0.32    0.48
  -1   0  10   -0.15    0.35
   1   0 -10    0.17    0.43
  -1   0  10   -0.06    0.38
  -7  -2  -3    6.59    0.64
  -7  -2  -3    4.93    0.51
   7   2   3    6.59    0.57
  -7   2  -3    6.85    0.66
   7   2   3    6.90    0.66
  -7  -2  -3    6.85    0.58
  -7   2  -3    6.38    0.44
   7  -2   3    6.06    0.61
   7  -2   3    7.27    0.55
   7   2   3    6.71    0.58
   7  -2   3    6.21    0.62
   4   0  -9   -0.20    0.35
  -4   0   9   -0.00    0.22
   4   0  -9   -0.33    0.46
  -4   0   9   -0.04    0.32
   4   0  -9    0.14    0.28
   4   0  -9    0.06    0.52
  -4   0   9   -0.22    0.45
  -4   0   9   -0.09    0.46
   5   1  -8    5.79    0.57
  -5   1   8    5.58    0.46
   5  -1  -8    6.55    0.69
  -5   1   8    5.43    0.60
  -5  -1   8    5.78    0.56
  -5   1   8    5.86    0.59
   5  -1  -8    6.14    0.66
  -5  -1   8    6.16    0.45
   5   1  -8    5.85    0.63
   5   1  -8    5.79    0.59
   5  -1  -8    6.00    0.48
  -5   1   8    5.93    0.56
   5  -1  -8    6.65    0.63
  -5  -1   8    5.87    0.55
   5   1  -8    5.62    0.42
  -5  -1   8    5.91    0.67
   1  -2   9    1.99    0.19
  -1  -2  -9    2.52    0.43
   1  -2   9    2.28    0.32
  -1   2  -9    2.40    0.24
  -1  -2  -9    2.05    0.46
   1  -2   9    2.45    0.50
  -1  -2  -9    2.30    0.30
   1   2   9    2.43    0.27
   1   2   9    2.06    0.54
  -1   2  -9    1.84    0.44
  -1  -2  -9    1.77    0.56
   1  -2   9    2.13    0.43
   1  -2   9    2.45    0.56
   1   2   9    1.68    0.47
  -2   4   5    4.08    0.53
  -2  -4   5    4.23    0.23
  -2   4   5    4.25    0.52
  -2  -4   5    3.62    0.33
   2  -4  -5    4.48    0.60
   2  -4  -5    1.92    0.48
  -2  -4   5    3.75    0.40
  -2  -4   5    2.06    0.21
   2  -4  -5    4.23    0.50
   2  -4  -5    4.47    0.32
  -3   1  -9    0.85    0.43
   3   1   9    0.93    0.24
   3   1   9    0.90    0.42
   3   1   9    1.12    0.53
   3   1   9    0.99    0.15
  -3  -1  -9    1.07    0.32
  -3  -1  -9    0.86    0.52
   3  -1   9    1.18    0.53
  -3   1  -9    1.11    0.33
  -3   1  -9    0.80    0.29
  -3   1  -9    1.09    0.46
  -3   1  -9    1.40    0.27
   3  -1   9    0.91    0.32
  -3  -1  -9    0.84    0.36
  -3  -1  -9    1.31    0.38
   3  -1   9    1.00    0.34
   3  -4   4    3.81    0.33
   3  -4   4    3.93    0.47
  -3   4  -4    2.97    0.32
  -3  -4  -4    3.59    0.50
  -3   4  -4    3.93    0.36
   3   4   4    3.25    0.21
   3   4   4    3.03    0.59
  -3  -4  -4    3.85    0.59
   3  -4   4    2.47    0.41
  -3  -4  -4    3.57    0.36
  -3  -4  -4    2.85    0.25
  -6   1   7   31.37    1.52
  -6  -1   7   32.13    1.64
  -6   1   7   31.70    1.61
   6   1  -7   33.54    1.64
   6  -1  -7   32.08    1.62
  -6   1   7   32.97    1.59
  -6  -1   7   29.24    1.36
   6   1  -7   31.43    1.42
  -6  -1   7   31.98    1.60
   6   1  -7   31.87    1.57
   6  -1  -7   31.63    1.58
   6   1  -7   32.43    1.60
   6  -1  -7   29.55    1.38
  -4   3  -6    0.62    0.29
  -4  -3  -6    0.47    0.52
   4  -3   6    0.63    0.39
   4   3   6    0.47    0.25
  -4  -3  -6    0.26    0.45
  -4   3  -6    0.57    0.34
   4  -3   6    0.12    0.42
  -4  -3  -6    0.42    0.22
   4   3   6    0.58    0.15
   4   3   6    0.53    0.49
  -4   3  -6    0.53    0.25
   4  -3   6    0.46    0.33
  -4   2   8   10.71    0.61
   4   2  -8   13.58    0.84
   4  -2  -8   12.98    0.89
  -4   2   8   13.58    0.89
  -4  -2   8   11.49    0.74
   4  -2  -8   14.53    0.83
   4   2  -8   13.20    0.89
  -4  -2   8   12.13    0.79
  -4  -2   8   12.84    0.85
  -4  -2   8   13.90    0.75
   4  -2  -8   12.91    0.80
  -4   2   8   13.84    0.84
   4   2  -8   11.89    0.73
  -4   2   8   12.33    0.65
  -1   0 -10    0.10    0.50
  -1   0 -10   -0.40    0.32
  -1   0 -10   -0.13    0.28
   1   0  10   -0.22    0.37
   1   0  10   -0.09    0.25
   1   0  10   -0.27    0.49
   4   4  -3    3.61    0.64
   4  -4  -3    2.99    0.44
  -4   4   3    2.89    0.47
  -4  -4   3    3.17    0.42
   4  -4  -3    3.05    0.50
   4  -4  -3    3.45    0.52
  -4  -4   3    3.23    0.20
  -4   4   3    3.12    0.36
  -4  -4   3    3.16    0.39
   4   4  -3    3.80    0.30
  -4  -4   3    3.46    0.39
   4  -4  -3    3.38    0.43
  -4   4   3    3.28    0.30
  -7   2   4   26.97    1.38
  -7   2   4   27.99    1.44
   7  -2  -4   27.09    1.35
   7   2  -4   29.14    1.36
  -7  -2   4   29.03    1.49
   7  -2  -4   29.15    1.53
   7  -2  -4   29.01    1.35
  -7  -2   4   28.57    1.45
   7   2  -4   29.79    1.45
  -7   2   4   27.55    1.35
   6   2  -6   25.41    1.28
  -6  -2   6   24.17    1.14
   6  -2  -6   25.00    1.36
  -6   2   6   25.04    1.34
   6  -2  -6   23.76    1.15
   6   2  -6   24.54    1.26
   6   2  -6   24.12    1.10
  -6   2   6   25.03    1.26
   6  -2  -6   24.86    1.30
  -6  -2   6   23.57    1.27
   6   2  -6   23.75    1.24
  -6   2   6   23.80    1.21
  -6   2   6   21.45    1.12
   6   2  -6   21.40    1.00
  -6  -2   6   23.36    1.26
   2  -2  -9    6.22    0.67
  -2   2   9    5.92    0.65
  -2  -2   9    5.99    0.65
  -2  -2   9    6.19    0.68
   2  -2  -9    5.82    0.50
  -2  -2   9    6.23    0.55
  -2   2   9    5.62    0.68
   2   2  -9    6.02    0.49
   2  -2  -9    6.44    0.79
   2  -2  -9    6.97    0.66
   2   2  -9    5.65    0.57
   2   2  -9    6.34    0.69
  -2   2   9    6.04    0.61
  -2   4  -5    7.66    0.56
  -2  -4  -5    8.62    0.68
   2  -4   5    8.05    0.71
   2   4   5    7.78    0.80
   2   4   5    7.75    0.57
   2  -4   5    8.02    0.68
  -2  -4  -5    8.16    0.77
  -2   4  -5    8.15    0.62
   2  -4   5    7.49    0.63
  -2  -4  -5    7.90    0.83
  -7   0   6    0.88    0.46
  -7   0   6   -0.60    0.46
   7   0  -6    0.19    0.42
   7   0  -6   -0.05    0.23
   7   0  -6   -0.08    0.43
  -6   3  -3   26.04    1.22
   6  -3   3   25.78    1.37
  -6  -3  -3   26.54    1.36
   6  -3   3   29.17    1.37
   6   3   3   27.62    1.46
   6  -3   3   24.31    1.19
  -6   3  -3   26.02    1.36
   6  -3   3   26.27    1.39
  -6   3  -3   28.07    1.41
  -6  -3  -3   26.78    1.35
   6   3   3   25.75    1.23
  -8   1  -2   10.59    0.93
   8  -1   2   10.79    0.70
  -8   1  -2   10.49    0.90
  -8  -1  -2   11.76    0.86
  -8  -1  -2   10.74    0.47
   8  -1   2    9.96    0.86
   8  -1   2   10.50    0.82
   8   1   2   11.49    0.77
  -8   1  -2   10.86    0.44
   8   1   2   11.39    0.74
  -8  -1  -2   10.83    0.61
   8   1   2   10.71    0.59
  -8   1  -2   11.50    0.63
   2   0 -10   10.64    0.48
   2   0 -10    9.73    0.74
   2   0 -10   10.94    0.85
  -2   0  10    9.26    0.87
   2   0 -10   11.13    0.81
  -2   0  10   10.96    0.76
  -2   0  10   10.32    0.84
   0  -3  -8   22.73    1.20
   0   3   8   21.59    1.17
   0  -3  -8   20.34    0.93
   0  -3  -8   21.21    1.24
   0  -3   8   20.80    0.95
   0  -3   8   20.22    1.15
   0   3  -8   18.94    0.99
   0  -3   8   19.96    1.17
   0  -3   8   22.17    1.06
   0   3   8   22.18    1.23
   0  -3   8   20.64    1.11
   0  -3  -8   22.82    1.19
   0   3   8   21.64    1.07
   5   3   5   11.44    0.66
  -5   3  -5   10.56    0.87
  -5  -3  -5   10.94    0.57
   5  -3   5   10.76    0.62
   5  -3   5   10.09    0.74
   5  -3   5   10.80    0.67
  -5  -3  -5   11.33    0.74
   5  -3   5   10.57    0.83
  -5   3  -5   10.93    0.59
  -5  -3  -5    9.80    0.90
   5   3   5    8.23    0.81
   5   3   5   10.23    0.68
  -5   3  -5   11.35    0.74
   5  -3   5   11.80    0.81
  -5  -3  -5   10.56    0.87
  -3   3  -7    0.54    0.24
   3  -3   7   -0.02    0.19
  -3   3  -7    0.10    0.33
   3  -3   7    0.18    0.41
  -3  -3  -7   -0.24    0.48
   3  -3   7    0.21    0.40
   3   3   7    0.08    0.16
  -3  -3  -7    0.41    0.29
   3  -3   7    0.11    0.32
   3   3   7    0.27    0.43
  -3  -3  -7    0.62    0.46
   0  -1  10   23.00    1.16
   0   1 -10   22.55    1.25
   0  -1 -10   21.78    1.18
   0  -1  10   20.26    1.09
   0   1  10   21.19    1.09
   0  -1 -10   21.23    1.04
   0   1 -10   22.25    1.20
   0   1 -10   21.96    1.06
   0  -1 -10   21.58    1.11
   0   1  10   19.05    0.99
   0   1  10   20.19    1.20
   0  -1  10   20.58    1.17
  -5   0  -8   -0.00    0.13
  -5   0  -8    0.17    0.32
   5   0   8   -0.08    0.33
  -5   0  -8    0.18    0.45
  -5   0  -8   -0.16    0.40
   5   0   8    0.30    0.39
  -5   0  -8   -0.01    0.30
   5   0   8   -0.20    0.47
  -7   1  -5    5.26    0.64
   7  -1   5    6.89    0.68
   7  -1   5    5.15    0.65
  -7   1  -5    6.19    0.70
  -7   1  -5    5.46    0.67
  -7   1  -5    6.23    0.56
  -7  -1  -5    5.55    0.58
   7   1   5    5.18    0.57
  -7  -1  -5    4.89    0.53
   7  -1   5    5.19    0.56
   7   1   5    4.95    0.56
  -7  -1  -5    4.94    0.55
   8   1  -3    8.58    0.66
   8   1  -3    8.76    0.79
  -8  -1   3    7.19    0.75
  -8   1   3    7.35    0.76
   8   1  -3    8.22    0.59
  -8  -1   3    8.58    0.65
  -8   1   3    7.97    0.65
   8  -1  -3    8.39    0.64
   8  -1  -3    7.68    0.78
  -8   1   3    7.60    0.79
   8   1  -3    7.44    0.75
  -8  -1   3    7.87    0.79
  -1   3   8    0.35    0.34
  -1   3   8    0.69    0.50
  -1  -3   8    0.19    0.41
   1  -3  -8    0.68    0.41
   1  -3  -8    0.00    0.19
  -1   3   8    0.17    0.48
   1  -3  -8    0.31    0.44
  -1  -3   8    0.08    0.19
  -1  -3   8    0.17    0.43
   1   3  -8    0.29    0.31
   1   3  -8    0.32    0.15
  -1  -3   8   -0.04    0.29
  -1  -3   8    0.31    0.13
  -1  -3   8    0.20    0.35
   1  -3  -8    0.07    0.54
  -1  -1  10    8.32    0.74
  -1   1  10    8.88    0.77
   1  -1 -10    8.16    0.70
  -1  -1  10    8.76    0.73
   1  -1 -10    9.26    0.81
   1   1 -10   10.12    0.92
   1   1 -10    8.60    0.66
  -1  -1  10    8.39    0.85
  -1   1  10    7.52    0.74
   1   1 -10    9.05    0.80
   1  -1 -10    7.34    0.56
  -1   1  10    9.33    0.79
  -4   4  -3    3.26    0.38
   4  -4   3    2.50    0.26
   4   4   3    3.15    0.26
  -4  -4  -3    3.21    0.39
  -4   4  -3    3.11    0.35
   4  -4   3    3.96    0.49
   4  -4   3    3.74    0.43
   4  -4   3    2.91    0.48
   4   4   3    3.02    0.58
   4   4   3    3.18    0.20
  -4  -4  -3    3.22    0.25
  -4  -4  -3    2.30    0.51
   8   0   3   -0.21    0.36
  -8   0  -3    0.10    0.26
   8   0   3   -0.55    0.49
  -8   0  -3   -0.49    0.51
  -8   0  -3    0.11    0.43
  -4   1   9   39.75    1.85
   4  -1  -9   39.51    1.85
   4   1  -9   39.51    1.92
   4  -1  -9   38.68    1.88
  -4  -1   9   40.30    1.82
  -4  -1   9   42.04    2.00
  -4  -1   9   38.50    1.77
  -4   1   9   37.65    1.67
  -4  -1   9   42.49    2.03
  -4   1   9   41.01    1.95
   4   1  -9   40.43    1.93
   4  -1  -9   41.93    1.89
   4  -1  -9   40.74    1.97
   4   1  -9   40.07    1.91
   6   0   7    0.38    0.50
  -6   0  -7    0.32    0.37
  -6   0  -7   -0.09    0.33
   6   0   7   -0.05    0.37
  -6   0  -7    0.31    0.48
  -6   0  -7    0.14    0.31
  -6   0  -7    0.06    0.11
  -8   0   4    8.65    0.82
   8   0  -4   10.15    0.73
  -8   0   4    8.92    0.88
   8   0  -4    8.33    0.63
   8   0  -4    9.35    0.75
  -8   0   4    9.09    0.70
   8   0  -4    9.95    0.87
   8   0  -4    9.37    0.86
   6  -3  -4    8.44    0.78
   6  -3  -4    7.72    0.74
  -6  -3   4    7.83    0.59
  -6  -3   4    6.75    0.72
   6   3  -4    7.18    0.63
   6   3  -4    7.33    0.64
  -6   3   4    7.05    0.66
  -6  -3   4    7.15    0.70
   6  -3  -4    5.20    0.60
  -6   3   4    8.33    0.82
   6  -3  -4    8.04    0.68
  -6   3   4    8.08    0.73
   1  -3   8    2.97    0.51
   1  -3   8    3.23    0.29
   1   3   8    4.02    0.52
  -1  -3  -8    3.48    0.44
   1  -3   8    3.21    0.46
  -1   3  -8    3.44    0.38
   1  -3   8    3.33    0.41
   1   3   8    2.64    0.55
  -1  -3  -8    3.00    0.61
   1   3   8    3.48    0.30
  -1  -3  -8    3.09    0.31
   1  -3   8    3.68    0.30
  -2   2  -9   24.86    1.31
  -2  -2  -9   21.37    1.12
   2  -2   9   22.07    1.14
   2  -2   9   24.56    1.20
   2   2   9   24.91    1.28
  -2  -2  -9   24.01    1.19
  -2   2  -9   22.25    1.16
   2  -2   9   22.33    1.24
  -2  -2  -9   22.65    1.16
  -2   2  -9   24.44    1.13
   2   2   9   23.90    1.11
  -2  -2  -9   24.01    1.34
  -5   2  -7    0.32    0.30
  -5   2  -7    0.13    0.41
  -5  -2  -7   -0.15    0.39
  -5  -2  -7    0.19    0.18
   5   2   7   -0.20    0.28
  -5  -2  -7    0.34    0.33
   5  -2   7    0.40    0.41
   5  -2   7    0.05    0.44
  -5  -2  -7   -0.23    0.47
   1   1  10    4.76    0.59
  -1  -1 -10    5.35    0.57
  -1   1 -10    5.02    0.59
   1  -1  10    5.57    0.58
  -1   1 -10    4.94    0.46
   1  -1  10    4.06    0.42
  -1  -1 -10    4.64    0.48
   1  -1  10    5.32    0.67
   1   1  10    3.98    0.59
   1   1  10    4.46    0.43
  -1   1 -10    4.55    0.62
  -1  -1 -10    5.21    0.60
   0   4   6    2.40    0.39
   0  -4   6    2.22    0.30
   0  -4   6    2.01    0.37
   0  -4   6    2.45    0.24
   0  -4   6    2.36    0.23
   0  -4  -6    2.50    0.52
   0  -4  -6    2.24    0.23
   0  -4  -6    2.93    0.61
   0   4   6    2.56    0.51
   0   4   6    2.79    0.32
  -2   0 -10   13.93    0.93
   2   0  10   14.02    0.69
  -2   0 -10   15.38    0.92
  -2   0 -10   15.71    0.84
  -2   0 -10   13.35    0.80
   2   0  10   14.49    0.96
   2   0  10   15.14    0.86
   7  -1  -6    3.62    0.52
   7   1  -6    4.79    0.42
   7  -1  -6    4.24    0.42
   7  -1  -6    4.25    0.59
  -7  -1   6    3.95    0.59
  -7   1   6    4.31    0.49
  -7   1   6    3.32    0.45
   7   1  -6    4.75    0.65
  -7   1   6    3.01    0.59
   7  -1  -6    3.14    0.48
  -7  -1   6    4.23    0.62
   7   1  -6    3.67    0.44
  -5   4   0    6.27    0.59
   5   4   0    8.92    0.68
  -5  -4   0    8.10    0.56
   5  -4   0    6.43    0.61
   5  -4   0    7.57    0.64
  -5   4   0    8.07    0.74
   5  -4   0    8.95    0.66
  -5  -4   0    9.39    0.79
   5  -4   0    8.77    0.78
   5  -4   0    7.64    0.74
  -5  -4   0    8.11    0.73
   5   4   0    8.35    0.79
  -5  -4   0    8.75    0.77
  -4   0  -9    0.06    0.44
  -4   0  -9   -0.12    0.28
   4   0   9   -0.08    0.33
  -4   0  -9    0.15    0.34
   4   0   9   -0.26    0.49
   4   0   9    0.03    0.29
  -3  -4   5   21.97    1.01
  -3  -4   5   21.12    1.14
   3  -4  -5   20.55    1.10
  -3  -4   5   20.11    1.02
  -3   4   5   22.73    1.20
   3  -4  -5   22.46    1.12
  -3   4   5   21.66    1.00
   3  -4  -5   21.53    1.18
   3  -4  -5   22.11    1.25
  -3  -4   5   22.44    1.00
  -1  -4   6    1.93    0.23
  -1  -4   6    2.62    0.23
  -1  -4   6    1.76    0.62
  -1  -4   6    2.22    0.36
   1  -4  -6    1.96    0.25
  -1   4   6    1.47    0.40
   1  -4  -6    2.10    0.54
  -1   4   6    2.13    0.37
  -1   4   6    1.98    0.53
  -1  -4   6    2.28    0.21
  -1  -4   6    2.35    0.26
   1  -4  -6    2.55    0.51
   1  -4  -6    2.76    0.58
   2  -1 -10    7.58    0.61
  -2   1  10   11.42    0.75
   2   1 -10    9.76    0.93
   2  -1 -10    8.02    0.84
   2   1 -10    9.15    0.80
  -2  -1  10   10.08    0.88
   2   1 -10   10.32    0.75
   2  -1 -10    9.65    0.85
  -2  -1  10   10.27    0.87
  -2  -1  10    9.24    0.75
   2   1 -10    9.82    0.92
  -2   1  10    8.78    0.85
  -2   1  10    9.42    0.80
  -7   2  -4    5.30    0.66
  -7  -2  -4    5.38    0.58
   7  -2   4    6.09    0.57
   7   2   4    6.23    0.61
  -7  -2  -4    5.76    0.61
   7   2   4    6.41    0.66
  -7  -2  -4    6.72    0.47
   7  -2   4    6.37    0.69
  -7  -2  -4    5.97    0.60
  -7   2  -4    7.24    0.76
   7  -2   4    5.11    0.67
   2  -3  -8    1.60    0.55
   2   3  -8    2.51    0.34
   2  -3  -8    3.12    0.30
  -2  -3   8    2.70    0.54
  -2   3   8    3.23    0.52
  -2   3   8    3.73    0.45
  -2   3   8    4.40    0.62
   2  -3  -8    3.30    0.50
   2  -3  -8    3.46    0.48
  -2  -3   8    3.03    0.38
  -2  -3   8    3.52    0.46
   2   3  -8    3.60    0.23
  -2  -3   8    2.75    0.32
  -2  -3   8    3.25    0.30
  -5  -4   1   22.58    1.00
   5   4  -1   23.65    1.13
  -5  -4   1   23.08    1.20
  -5  -4   1   21.95    1.13
  -5   4   1   23.22    1.20
   5  -4  -1   21.29    1.13
   5  -4  -1   21.62    1.10
   5  -4  -1   21.47    1.13
  -5   4   1   22.07    1.15
   5  -4  -1   22.81    1.23
  -5  -4   1   20.85    1.09
   5   4  -1   22.51    1.24
   4   2   8   12.89    0.80
  -4   2  -8   11.86    0.83
   4  -2   8   12.16    0.71
  -4   2  -8   11.83    0.61
  -4  -2  -8   12.97    0.71
  -4  -2  -8   10.46    0.83
  -4  -2  -8   11.89    0.78
   4   2   8   11.42    0.65
   4  -2   8   10.69    0.63
   4  -2   8    9.65    0.86
  -4   2  -8   10.17    0.80
   4   2   8   11.15    0.54
   4   2   8   11.53    0.86
  -4  -2  -8   11.72    0.86
   5  -1   8    1.67    0.40
   5   1   8    1.76    0.56
   5  -1   8    2.34    0.53
  -5   1  -8    1.75    0.15
   5  -1   8    1.69    0.38
  -5  -1  -8    1.42    0.39
  -5  -1  -8    1.54    0.31
  -5  -1  -8    1.30    0.19
  -5  -1  -8    1.46    0.40
  -5   1  -8    1.87    0.30
   5   1   8    1.06    0.39
  -5  -1  -8    1.46    0.44
  -5   1  -8    1.88    0.48
   5   1   8    1.76    0.34
   4  -4  -4   25.04    1.31
   4  -4  -4   29.56    1.44
  -4  -4   4   28.31    1.23
  -4   4   4   28.54    1.44
  -4  -4   4   24.88    1.24
  -4  -4   4   27.84    1.40
   4   4  -4   29.32    1.33
  -4   4   4   27.05    1.37
  -4   4   4   26.40    1.22
   4  -4  -4   28.38    1.44
   4  -4  -4   25.65    1.28
  -3  -2   9   12.82    0.86
   3   2  -9   12.62    0.75
  -3   2   9   11.41    0.76
  -3   2   9   12.92    0.84
   3  -2  -9   13.49    0.76
  -3  -2   9   13.93    0.75
   3   2  -9   14.10    0.71
   3   2  -9   13.65    0.82
  -3  -2   9   12.65    0.74
   3   2  -9   12.97    0.88
  -3   2   9   13.80    0.84
   3  -2  -9   12.51    0.73
  -3  -2   9   13.09    0.83
   3  -2  -9   13.20    0.86
   5  -4   1    0.20    0.21
   5  -4   1   -0.03    0.41
  -5   4  -1    0.21    0.39
   5  -4   1    0.42    0.31
  -5  -4  -1    0.18    0.37
  -5  -4  -1    0.24    0.36
  -5  -4  -1    0.10    0.16
   5   4   1   -0.02    0.38
  -5  -4  -1    0.30    0.37
   5  -4   1    0.14    0.35
  -5   4  -1    0.64    0.35
   5  -4   1    0.20    0.39
  -1   4  -6    2.40    0.23
   1  -4   6    2.27    0.39
   1   4   6    2.55    0.53
   1  -4   6    2.55    0.21
   1   4   6    2.13    0.40
   1  -4   6    2.65    0.32
  -1   4  -6    2.56    0.18
  -1  -4  -6    2.96    0.55
  -1  -4  -6    2.74    0.30
  -1  -4  -6    1.97    0.59
   1  -4   6    2.68    0.35
   1   4   6    2.53    0.28
   8  -1   3   13.41    0.91
  -8  -1  -3   12.58    0.87
   8   1   3   11.43    0.79
  -8   1  -3   14.05    0.74
  -8   1  -3   13.44    0.70
  -8   1  -3   13.42    0.87
  -8  -1  -3   13.95    0.78
  -8  -1  -3   14.47    0.87
   8   1   3   14.94    0.88
   8  -1   3   14.28    0.89
   8   1   3   12.87    0.81
   8  -1   3   14.80    0.84
   5   3  -6    5.00    0.48
  -5  -3   6    5.32    0.44
  -5  -3   6    5.06    0.62
   5  -3  -6    5.48    0.57
   5   3  -6    5.63    0.47
  -5   3   6    5.56    0.66
   5  -3  -6    5.39    0.63
  -5   3   6    5.06    0.48
   5   3  -6    5.18    0.55
  -5   3   6    6.16    0.63
  -5  -3   6    5.37    0.59
   5  -3  -6    5.53    0.67
  -5   3   6    4.78    0.53
   4  -3  -7   29.69    1.55
  -4  -3   7   24.42    1.15
  -4  -3   7   28.39    1.45
   4   3  -7   26.94    1.33
  -4   3   7   24.48    1.26
  -4   3   7   26.92    1.40
   4   3  -7   26.44    1.26
   4  -3  -7   24.38    1.23
   6  -2   6   15.68    0.92
  -6   2  -6   13.80    0.89
  -6  -2  -6   12.92    0.79
   6   2   6   14.95    0.84
  -6   2  -6   15.23    0.94
  -6  -2  -6   13.05    0.81
  -6  -2  -6   13.39    0.65
   6  -2   6   12.76    0.79
   6  -2   6   14.64    0.94
  -6  -2  -6   15.74    0.95
  -3   0  10    0.27    0.45
  -3   0  10   -0.04    0.44
   3   0 -10    0.56    0.44
   3   0 -10    0.21    0.52
   3   0 -10   -0.12    0.32
  -3   0  10   -0.15    0.36
  -6   1  -7    8.31    0.77
  -6  -1  -7    8.25    0.78
   6  -1   7    7.88    0.74
   6  -1   7    7.94    0.69
  -6   1  -7    7.77    0.77
  -6  -1  -7    8.52    0.59
   6   1   7    7.87    0.76
   6  -1   7    8.09    0.77
  -6  -1  -7    8.07    0.71
  -6  -1  -7    8.31    0.75
   6   1   7    8.16    0.71
  -6  -1  -7    8.08    0.74
   8  -1  -4   10.65    0.41
   8  -1  -4   10.61    0.89
  -8  -1   4    9.09    0.87
   8   1  -4   11.80    0.81
  -8  -1   4   11.57    0.83
   8  -1  -4    9.27    0.87
  -8   1   4    7.90    0.84
   8   1  -4    8.55    0.62
   8   1  -4   11.07    0.60
   8  -1  -4    7.92    0.62
  -8   1   4    7.31    0.62
  -8   1   4   10.67    0.65
  -8  -1   4    8.14    0.63
   8   1  -4   10.31    0.86
   5  -4  -2    0.05    0.40
   5  -4  -2   -0.18    0.33
  -5   4   2    0.06    0.26
  -5   4   2   -0.14    0.39
  -5  -4   2   -0.13    0.34
  -5  -4   2   -0.37    0.37
  -5  -4   2    0.31    0.27
   5  -4  -2    0.22    0.45
   5  -4  -2    0.10    0.37
   5   4  -2    0.13    0.38
   5   4  -2    0.54    0.25
  -5  -4   2    0.20    0.14
  -7  -2   5    5.35    0.68
   7   2  -5    5.10    0.56
   7   2  -5    5.70    0.47
   7  -2  -5    6.27    0.76
   7  -2  -5    4.80    0.58
  -7  -2   5    4.79    0.44
  -7   2   5    5.39    0.56
  -7   2   5    4.82    0.57
  -7  -2   5    5.77    0.66
   7   2  -5    4.72    0.46
  -7   2   5    4.77    0.67
   7  -2  -5    5.06    0.49
   7  -2  -5    4.11    0.59
   3  -4   5    0.12    0.26
   3  -4   5    0.16    0.37
  -3   4  -5    0.17    0.24
  -3   4  -5    0.26    0.22
  -3  -4  -5   -0.09    0.45
   3   4   5    0.35    0.17
  -3  -4  -5    0.02    0.29
   3  -4   5    0.46    0.32
  -3  -4  -5    0.22    0.51
   3   4   5    0.42    0.50
   6  -3   4    8.47    0.70
  -6   3  -4    9.48    0.69
  -6  -3  -4    8.75    0.74
   6  -3   4    9.30    0.84
  -6   3  -4    9.33    0.80
  -6   3  -4    9.46    0.83
  -6  -3  -4    9.97    0.68
   6   3   4    9.04    0.70
   6   3   4    7.19    0.74
   6  -3   4    9.96    0.77
   6  -3   4    8.21    0.79
  -6  -3  -4    8.69    0.78
   8   2   0   13.83    0.82
   8  -2   0   11.00    0.60
  -8  -2   0   11.65    0.79
  -8  -2   0   12.73    0.68
  -8   2   0   12.13    0.87
  -8  -2   0   13.24    0.66
   8  -2   0   11.59    0.83
   8  -2   0   12.77    0.67
  -8   2   0   12.44    0.85
  -8  -2   0   12.60    0.81
  -8   2   0   13.29    0.77
   8  -2   0   13.31    0.87
   0   5   0    0.35    0.34
   0  -5   0   -0.03    0.38
   0   5   0    0.04    0.19
   0  -5   0    0.21    0.30
   0  -5   0   -0.06    0.19
   0  -5   0    0.40    0.46
   2  -3   8    6.08    0.65
   2  -3   8    6.26    0.71
  -2  -3  -8    6.32    0.77
  -2   3  -8    6.44    0.57
  -2  -3  -8    5.67    0.55
   2  -3   8    5.95    0.50
   2   3   8    7.20    0.54
   2  -3   8    6.58    0.71
   2   3   8    7.50    0.74
  -2   3  -8    6.42    0.55
   2  -3   8    7.17    0.72
  -2  -3  -8    5.62    0.53
  -8   2   1    5.46    0.61
  -8  -2   1    4.72    0.65
   8  -2  -1    4.78    0.61
   8   2  -1    5.71    0.61
   8   2  -1    5.34    0.59
   8  -2  -1    5.85    0.49
  -8   2   1    5.75    0.57
  -8  -2   1    5.22    0.45
   8  -2  -1    5.26    0.45
   8   2  -1    4.23    0.50
  -8  -2   1    5.92    0.64
   8  -2  -1    5.27    0.68
  -8  -2   1    5.82    0.46
  -8   2   1    5.22    0.66
   7  -3   0    1.50    0.52
  -7   3   0    1.47    0.39
  -7  -3   0    1.23    0.28
   7   3   0    0.69    0.33
  -7  -3   0    1.31    0.41
   7   3   0    1.24    0.39
   7  -3   0    1.47    0.50
   7  -3   0    1.54    0.31
  -7   3   0    1.20    0.47
  -7  -3   0    1.46    0.45
  -7   3   0    0.78    0.44
   7   3   0    1.37    0.36
   7  -3   0    1.36    0.25
   6   0  -8    0.24    0.24
  -6   0   8   -0.27    0.32
  -6   0   8   -0.02    0.34
   6   0  -8    0.04    0.38
   6   0  -8    0.37    0.47
  -6   0   8    0.42    0.53
   6   0  -8   -0.10    0.43
  -6   0   8    0.03    0.31
  -7   0  -6    0.53    0.40
   7   0   6   -0.24    0.36
   7   0   6   -0.43    0.41
  -7   0  -6   -0.04    0.36
  -7   0  -6   -0.21    0.34
   7   0   6   -0.09    0.31
  -7   0  -6   -0.01    0.38
  -2  -4   6   72.46    3.05
   2  -4  -6   69.38    3.14
  -2  -4   6   69.13    2.92
  -2  -4   6   69.18    2.94
   2  -4  -6   64.02    2.85
  -2  -4   6   65.07    2.90
  -2   4   6   70.60    3.09
   2  -4  -6   68.56    3.01
   7  -3  -1    0.22    0.45
  -7   3   1    0.15    0.34
   7   3  -1    0.15    0.32
  -7  -3   1   -0.09    0.23
  -7  -3   1   -0.27    0.44
   7  -3  -1    0.04    0.23
   7  -3  -1   -0.61    0.47
   7  -3  -1    0.14    0.27
  -7  -3   1    0.33    0.42
  -7   3   1    0.12    0.38
   7   3  -1    0.21    0.38
   7  -3  -1   -0.03    0.33
   7   3  -1   -0.39    0.34
  -7   3   1    0.33    0.45
  -2   1 -10   14.17    0.75
   2  -1  10   11.83    0.67
   2  -1  10   13.27    0.92
  -2   1 -10   13.84    0.90
   2  -1  10   13.14    0.79
  -2  -1 -10   14.20    0.84
  -2   1 -10   13.69    0.90
  -2   1 -10   13.39    0.85
   2   1  10   12.60    0.81
   2   1  10   13.51    0.94
  -2  -1 -10   13.70    0.80
   2  -1  10   11.36    0.55
   2   1  10   13.29    0.69
  -2  -1 -10   14.10    0.86
  -4   4  -4   16.34    0.89
   4   4   4   17.87    0.82
   4   4   4   16.54    1.03
  -4  -4  -4   17.03    1.05
   4  -4   4   15.98    0.92
   4  -4   4   14.88    0.84
   4  -4   4   17.81    1.04
  -4   4  -4   18.35    0.97
  -4  -4  -4   17.09    0.92
   4  -4   4   17.67    0.91
   4   1   9    1.21    0.14
   4   1   9    1.52    0.56
  -4  -1  -9    0.98    0.28
  -4   1  -9    0.97    0.38
  -4  -1  -9    0.90    0.44
   4  -1   9    1.18    0.34
  -4   1  -9    1.28    0.37
   4  -1   9    1.26    0.52
   4   1   9    0.82    0.40
   4  -1   9    1.00    0.38
  -4  -1  -9    1.10    0.40
  -4   1  -9    1.15    0.26
  -4   1  -9    1.47    0.48
  -4  -1  -9    1.06    0.38
   4   1   9    0.88    0.28
   0  -5   1    7.22    0.74
   0   5  -1    6.43    0.56
   0   5   1    6.56    0.63
   0  -5  -1    5.77    0.62
   0  -5  -1    7.57    0.55
   0  -5   1    7.22    0.55
   0  -5  -1    7.00    0.62
   0   5  -1    6.57    0.50
   0  -5   1    6.71    0.58
   0  -5  -1    5.74    0.64
   8   0   4   18.63    1.02
  -8   0  -4   18.74    1.06
   8   0   4   20.98    1.16
  -8   0  -4   20.82    1.04
   8   0   4   18.82    1.06
  -5  -4  -2   10.68    0.55
  -5  -4  -2   11.45    0.57
   5  -4   2   11.51    0.79
  -5   4  -2    9.15    0.81
   5  -4   2    8.36    0.76
   5  -4   2   12.01    0.66
   5   4   2   10.63    0.68
  -5   4  -2   10.43    0.84
  -5  -4  -2   10.19    0.89
   1  -5   0    2.94    0.47
   1  -5   0    3.23    0.27
   1   5   0    2.76    0.42
  -1   5   0    2.83    0.37
  -1   5   0    2.58    0.28
  -1  -5   0    2.34    0.32
   1  -5   0    2.37    0.40
   1  -5   0    1.02    0.41
  -1  -5   0    3.40    0.24
  -1  -5   0    2.59    0.49
   5   0  -9    0.71    0.28
  -5   0   9    0.74    0.31
   5   0  -9    0.50    0.42
   5   0  -9    0.44    0.48
  -5   0   9    0.23    0.50
   5   0  -9    0.60    0.48
  -5   0   9    0.75    0.44
  -5   0   9    1.03    0.36
   8  -2   1   15.70    0.78
  -8   2  -1   18.55    1.11
   8  -2   1   19.49    1.14
  -8  -2  -1   19.83    1.00
  -8  -2  -1   19.02    1.10
   8  -2   1   17.74    1.05
   8  -2   1   19.30    0.97
  -8   2  -1   17.08    1.04
  -7  -3  -1    6.23    0.63
  -7  -3  -1    6.49    0.46
  -7  -3  -1    5.93    0.65
   7  -3   1    6.53    0.72
  -7   3  -1    6.80    0.70
   7  -3   1    5.86    0.52
  -7  -3  -1    5.47    0.54
   7  -3   1    6.70    0.54
  -7   3  -1    5.78    0.59
   7  -3   1    4.89    0.58
   7   3   1    6.43    0.70
   8  -2  -2    1.50    0.51
  -8   2   2    1.64    0.47
  -8  -2   2    1.28    0.22
   8  -2  -2    1.48    0.24
   8   2  -2    1.91    0.37
  -8  -2   2    1.33    0.22
   8  -2  -2    1.26    0.27
  -8   2   2    1.27    0.33
  -8  -2   2    1.55    0.52
   8   2  -2    1.52    0.37
   8  -2  -2    2.24    0.55
  -8  -2   2    1.06    0.45
   8   2  -2    1.55    0.41
   1  -5  -1    2.22    0.26
   1   5  -1    2.22    0.20
  -1  -5   1    2.03    0.26
   1  -5  -1    2.65    0.50
  -1   5   1    2.26    0.38
  -1  -5   1    2.60    0.22
   1  -5  -1    2.22    0.35
   1   5  -1    2.00    0.37
  -1  -5   1    2.00    0.46
   1  -5  -1    2.43    0.47
   1  -5   1   19.01    1.02
  -1   5  -1   19.01    0.91
  -1  -5  -1   20.03    1.09
   1  -5   1   18.01    0.96
  -1  -5  -1   17.26    1.06
   1  -5   1   17.82    0.88
  -1  -5  -1   21.11    0.97
  -1  -5  -1   19.89    0.99
   1  -5   1   17.43    1.02
   1   5   1   18.33    1.04
  -5   2   8    2.42    0.52
  -5   2   8    2.76    0.32
   5   2  -8    2.42    0.21
  -5  -2   8    2.31    0.31
  -5  -2   8    2.65    0.55
  -5  -2   8    2.65    0.45
   5   2  -8    2.96    0.43
   5  -2  -8    2.60    0.37
   5   2  -8    2.57    0.40
   5   2  -8    2.35    0.45
   5  -2  -8    2.92    0.41
  -5   2   8    2.29    0.42
  -5  -2   8    2.34    0.34
  -7  -3   2    1.54    0.23
   7  -3  -2    1.20    0.29
   7   3  -2    1.46    0.36
  -7   3   2    1.11    0.42
   7   3  -2    1.71    0.39
  -7  -3   2    1.26    0.43
   7  -3  -2    1.33    0.46
   7  -3  -2    1.10    0.35
   7   3  -2    1.43    0.38
   7  -3  -2    1.36    0.48
  -7   3   2    0.95    0.39
  -7  -3   2    1.83    0.45
  -2  -4  -6   -0.02    0.49
   2  -4   6   -0.15    0.16
  -2   4  -6    0.04    0.16
   2  -4   6    0.13    0.30
   2   4   6   -0.11    0.18
  -2   4  -6    0.06    0.19
   2  -4   6   -0.10    0.30
  -2   4  -6    0.03    0.14
   2   4   6   -0.42    0.48
  -2  -4  -6   -0.25    0.21
  -2  -4  -6    0.17    0.49
   2  -4   6   -0.21    0.35
   8   0  -5   -0.35    0.20
  -8   0   5   -0.58    0.43
   8   0  -5    0.90    0.51
  -8   0   5   -0.18    0.46
   8   0  -5   -0.25    0.29
  -8   0   5    0.06    0.26
   8   0  -5    0.51    0.38
   8   0  -5   -0.25    0.19
   3   1 -10    6.30    0.64
   3   1 -10    5.84    0.64
   3  -1 -10    6.65    0.61
   3   1 -10    6.94    0.77
  -3  -1  10    6.74    0.72
   3   1 -10    5.80    0.50
  -3   1  10    5.96    0.64
  -3  -1  10    6.46    0.59
   3  -1 -10    5.42    0.53
  -3  -1  10    5.93    0.66
   3  -1 -10    5.63    0.73
  -3   1  10    6.49    0.70
  -3   1  10    5.83    0.64
   3  -1 -10    6.62    0.71
   3  -2   9   26.00    1.38
  -3  -2  -9   26.26    1.29
  -3  -2  -9   26.33    1.32
   3   2   9   24.45    1.10
   3   2   9   23.44    1.27
   3   2   9   27.35    1.37
  -3   2  -9   25.12    1.15
   3  -2   9   24.89    1.22
  -3  -2  -9   26.00    1.41
  -3   2  -9   25.59    1.28
  -3  -2  -9   24.25    1.21
   3  -2   9   24.99    1.28
  -3   2  -9   27.26    1.40
   6   3  -5    1.71    0.30
  -6   3   5    1.84    0.38
   6  -3  -5    1.39    0.48
  -6   3   5    1.34    0.41
   6   3  -5    1.66    0.31
   6   3  -5    1.44    0.35
  -6  -3   5    1.56    0.42
   6  -3  -5    2.01    0.52
   6   3  -5    2.04    0.33
  -6   3   5    1.97    0.35
  -6  -3   5    1.19    0.23
  -6   3   5    1.62    0.43
  -6  -3   5    1.61    0.44
   6  -3  -5    1.93    0.37
   3   3  -8    7.22    0.53
  -3   3   8    6.91    0.71
  -3  -3   8    6.45    0.64
  -3   3   8    6.79    0.67
  -3  -3   8    6.52    0.66
   3   3  -8    6.39    0.61
  -3   3   8    7.65    0.73
   3  -3  -8    5.86    0.69
   3  -3  -8    5.98    0.61
  -3  -3   8    6.86    0.54
   3  -3  -8    6.08    0.54
  -3  -3   8    5.93    0.64
   6   2  -7   10.40    0.85
  -6  -2   7    8.97    0.69
   6   2  -7    8.87    0.78
   6   2  -7    8.92    0.64
  -6   2   7   10.33    0.81
  -6   2   7    9.48    0.80
   6   2  -7   10.59    0.86
  -6  -2   7    9.75    0.87
  -6   2   7    9.68    0.89
   6  -2  -7    9.79    0.77
   6  -2  -7    9.73    0.84
  -6  -2   7    9.55    0.82
  -4  -3  -7    3.81    0.52
   4  -3   7    3.88    0.48
  -4   3  -7    4.42    0.44
  -4  -3  -7    3.40    0.29
  -4  -3  -7    4.62    0.67
   4  -3   7    4.02    0.46
   4  -3   7    4.39    0.60
   4   3   7    4.13    0.33
   4   3   7    4.77    0.43
   4  -3   7    3.53    0.30
  -4   3  -7    4.44    0.54
  -5   4   3   15.22    0.91
  -5  -4   3   15.41    0.87
  -5  -4   3   16.60    0.82
   5   4  -3   17.54    0.88
   5  -4  -3   16.94    0.96
   5  -4  -3   16.69    0.92
  -5   4   3   15.51    0.80
   5   4  -3   16.60    1.00
   5  -4  -3   15.65    0.94
  -5  -4   3   17.42    0.79
   5  -4  -3   16.54    0.98
  -5  -4   3   17.74    1.00
   0  -5  -2   20.80    1.10
   0  -5  -2   19.00    1.11
   0  -5  -2   18.63    0.87
   0  -5   2   19.60    0.99
   0  -5   2   19.07    1.08
   0  -5   2   19.39    0.93
   0   5   2   19.21    1.06
   0   5  -2   19.76    0.91
   0  -5  -2   18.91    0.99
  -5   3  -6    6.60    0.67
  -5  -3  -6    6.42    0.66
   5   3   6    6.24    0.45
  -5   3  -6    6.52    0.62
   5   3   6    4.34    0.41
   5  -3   6    4.84    0.48
  -5  -3  -6    5.20    0.59
   5  -3   6    6.54    0.68
  -5   3  -6    5.61    0.47
  -5  -3  -6    5.95    0.64
   5  -3   6    6.48    0.70
   5  -3   6    6.10    0.63
   5   3   6    6.11    0.71
   5  -3   6    6.07    0.60
  -5  -3  -6    6.50    0.50
   7   0  -7   77.18    1.35
  -7   0   7   76.80    1.31
   7   0  -7   77.07    0.96
  -7   0   7   74.79    3.36
   7   0  -7   75.60    3.35
  -3   0 -10   -0.03    0.39
   3   0  10   -0.12    0.24
  -3   0 -10   -0.04    0.34
   3   0  10    0.16    0.36
   3   0  10   -0.14    0.51
   3   0  10   -0.01    0.10
  -3   0 -10    0.05    0.32
  -6  -1   8    0.69    0.35
  -6  -1   8    0.48    0.49
   6  -1  -8    0.52    0.38
   6  -1  -8    0.50    0.29
  -6  -1   8    0.52    0.30
   6  -1  -8    0.51    0.43
  -6   1   8    0.54    0.50
  -6  -1   8    0.32    0.29
  -6   1   8    0.14    0.38
   6   1  -8    0.24    0.38
  -6   1   8    0.27    0.31
   6   1  -8   -0.07    0.42
   6  -1  -8    1.24    0.48
   6   1  -8    0.26    0.40
   6   1  -8    0.37    0.23
  -7   1  -6    5.35    0.52
  -7  -1  -6    5.82    0.58
   7  -1   6    5.93    0.67
  -7   1  -6    6.49    0.70
  -7  -1  -6    5.63    0.57
   7  -1   6    5.37    0.57
   7   1   6    6.23    0.63
  -7  -1  -6    5.59    0.58
   7  -1   6    5.42    0.56
   7   1   6    5.25    0.66
  -7   1  -6    5.60    0.68
  -7  -1  -6    5.90    0.42
  -7   1  -6    5.22    0.62
   1  -5  -2    4.74    0.60
  -1  -5   2    4.29    0.36
   1  -5  -2    3.74    0.30
   1  -5  -2    3.92    0.44
  -1  -5   2    3.94    0.32
   1   5  -2    3.70    0.32
   1   5  -2    4.23    0.34
  -1   5   2    4.36    0.58
   1  -5  -2    3.61    0.58
  -1  -5   2    3.76    0.51
   8  -2   2   45.75    2.05
  -8  -2  -2   41.07    1.94
   8  -2   2   44.01    2.09
   8  -2   2   41.88    2.03
   8  -2   2   42.87    1.86
  -8   2  -2   41.54    1.83
  -8   2  -2   43.12    2.06
  -8  -2  -2   44.53    2.01
   8   2   2   40.64    1.97
   8   2   2   44.34    2.04
   8   2   2   41.74    1.94
  -1  -5  -2    0.49    0.44
   1  -5   2    0.60    0.31
   1  -5   2    0.50    0.39
   1   5   2    0.66    0.20
  -1   5  -2    0.65    0.20
   1  -5   2    0.98    0.26
  -1  -5  -2    0.94    0.27
   1   5   2    1.04    0.39
  -1  -5  -2    0.59    0.46
   7  -3   2    2.20    0.28
   7  -3   2    2.58    0.53
  -7  -3  -2    2.04    0.46
   7  -3   2    2.78    0.31
  -7  -3  -2    2.24    0.39
   7   3   2    2.95    0.50
  -7   3  -2    2.82    0.47
   7  -3   2    1.89    0.50
  -8   1  -4    0.75    0.51
  -8  -1  -4    1.58    0.52
   8  -1   4    0.43    0.51
   8   1   4    1.47    0.41
   8  -1   4    1.25    0.39
  -8   1  -4    1.28    0.24
  -8  -1  -4    0.94    0.33
  -8  -1  -4    1.42    0.39
   8   1   4    1.31    0.38
   8  -1   4    1.25    0.39
   2  -5   0    8.67    0.75
   2  -5   0    9.12    0.78
  -2  -5   0    8.43    0.80
   2  -5   0    7.80    0.63
   2  -5   0    8.16    0.76
  -2   5   0    9.18    0.70
   2   5   0    8.92    0.78
  -2  -5   0    8.51    0.65
  -2  -5   0    9.11    0.68
  -5  -1   9    0.01    0.27
  -5  -1   9   -0.06    0.33
   5   1  -9   -0.10    0.41
  -5   1   9    0.04    0.38
   5  -1  -9   -0.03    0.23
   5  -1  -9    0.66    0.43
   5   1  -9   -0.28    0.22
  -5   1   9   -0.22    0.23
  -5  -1   9   -0.32    0.48
   5  -1  -9   -0.05    0.48
   5   1  -9    0.43    0.41
   5  -1  -9    0.17    0.33
   5   1  -9    0.22    0.47
  -5   1   9    0.10    0.40
  -5  -1   9   -0.03    0.34
  -5   1   9    0.28    0.48
  -4   4   5   66.26    2.96
   4  -4  -5   61.23    2.78
  -4  -4   5   63.90    2.68
  -4  -4   5   62.90    2.82
   4  -4  -5   61.77    2.73
  -4   4   5   58.83    2.65
  -4   4   5   64.81    2.80
  -4  -4   5   61.78    2.74
   4  -4  -5   62.43    2.81
   4  -4  -5   67.27    2.95
  -4  -4   5   58.94    2.52
   0   2  10   13.35    0.76
   0   2  10   12.53    0.82
   0   2 -10   12.64    0.66
   0  -2 -10   11.49    0.74
   0  -2  10   13.48    0.76
   0  -2  10   12.00    0.82
   0  -2 -10   13.15    0.93
   0   2  10    9.86    0.88
   0   2 -10   12.41    0.84
   0  -2 -10   11.93    0.66
   0   2 -10   12.38    0.75
   0  -2  10   12.68    0.83
   0  -2 -10   10.72    0.60
   7  -2   5    2.07    0.40
  -7  -2  -5    2.64    0.39
  -7   2  -5    2.40    0.47
   7  -2   5    2.44    0.43
   7   2   5    2.43    0.52
  -7  -2  -5    2.51    0.17
  -7  -2  -5    1.82    0.42
  -7  -2  -5    2.84    0.44
  -7   2  -5    1.93    0.43
   7  -2   5    2.17    0.54
  -7  -2  -5    1.68    0.39
   7   2   5    2.48    0.33
  -8  -2   3    0.74    0.49
   8  -2  -3    0.63    0.53
   8  -2  -3    0.66    0.35
   8   2  -3    0.71    0.30
   8  -2  -3    1.24    0.24
   8   2  -3    1.17    0.40
   8   2  -3    0.85    0.42
  -8   2   3    0.62    0.42
   8  -2  -3    0.69    0.25
  -8   2   3    1.03    0.36
  -8  -2   3    0.83    0.42
  -2  -5   1   55.79    2.42
  -2  -5   1   51.78    2.41
   2  -5  -1   51.02    2.32
  -2  -5   1   57.20    2.46
  -2   5   1   47.73    2.11
   2   5  -1   55.50    2.52
   2  -5  -1   46.86    2.16
   2  -5  -1   55.00    2.52
  -2   5   1   50.10    2.26
   2   5  -1   49.57    2.10
   2  -5  -1   55.97    2.46
  -1  -2  10    2.99    0.34
   1   2 -10    3.09    0.39
   1   2 -10    3.45    0.28
   1   2 -10    3.02    0.50
   1  -2 -10    3.00    0.24
   1  -2 -10    2.21    0.56
   1  -2 -10    2.96    0.48
  -1  -2  10    2.55    0.44
  -1   2  10    3.18    0.41
  -1  -2  10    3.24    0.52
  -1   2  10    3.32    0.54
  -1   2  10    3.70    0.44
  -5   4  -3   35.54    1.70
   5  -4   3   30.72    1.52
   5  -4   3   30.76    1.54
   5  -4   3   32.10    1.46
   5  -4   3   32.76    1.56
  -5   4  -3   32.71    1.56
  -5  -4  -3   31.06    1.48
  -5  -4  -3   32.69    1.63
   5   4   3   32.77    1.64
  -5  -4  -3   32.05    1.41
   9   0   0    0.45    0.41
  -9   0   0    0.05    0.19
   9   0   0    0.39    0.29
  -9   0   0    0.19    0.21
   9   0   0    0.22    0.40
  -9   0   0    1.29    0.51
   9   0  -1    6.65    0.57
  -9   0   1    6.00    0.49
   9   0  -1    6.93    0.69
  -9   0   1    6.92    0.55
  -9   0   1    5.91    0.69
   2  -5   1    0.92    0.40
   2   5   1    1.19    0.43
   2  -5   1    1.08    0.36
  -2   5  -1    1.04    0.19
   2  -5   1    0.85    0.45
  -2  -5  -1    0.98    0.26
  -2   5  -1    1.11    0.26
   2  -5   1    1.15    0.33
  -2  -5  -1    0.54    0.47
  -2  -5  -1    0.86    0.27
   4   2  -9    0.67    0.44
  -4   2   9    0.82    0.38
   4   2  -9    0.53    0.32
   4  -2  -9    0.46    0.48
  -4   2   9    1.47    0.45
  -4   2   9    0.70    0.19
   4  -2  -9    0.75    0.34
  -4  -2   9    0.71    0.36
  -4  -2   9    0.84    0.25
  -4  -2   9    0.79    0.45
  -4  -2   9    0.38    0.33
  -4   2   9    1.15    0.44
   4   2  -9    0.78    0.38
   4  -2  -9    0.61    0.35
  -7   3   3   25.24    1.26
  -7  -3   3   25.67    1.30
   7  -3  -3   24.82    1.34
   7  -3  -3   23.55    1.20
   7   3  -3   24.28    1.24
   7  -3  -3   22.20    1.21
  -7  -3   3   22.33    1.03
   7   3  -3   24.71    1.23
  -7   3   3   21.87    1.15
  -7  -3   3   22.52    1.04
  -7  -3   3   23.01    1.22
   7  -3  -3   26.34    1.27
   3  -4  -6    0.62    0.36
  -3   4   6    0.70    0.42
  -3  -4   6    0.78    0.27
  -3   4   6    1.33    0.19
  -3  -4   6    1.12    0.15
  -3  -4   6    0.54    0.20
   3  -4  -6    1.65    0.54
   3  -4  -6    0.98    0.41
  -3  -4   6    0.85    0.35
  -8   1   5    0.45    0.43
  -8   1   5   -0.01    0.32
   8  -1  -5   -0.15    0.45
  -8  -1   5    0.18    0.45
   8   1  -5    0.11    0.20
   8  -1  -5    0.01    0.34
   8   1  -5   -0.03    0.33
   8   1  -5    0.06    0.45
   8  -1  -5   -0.03    0.51
  -8  -1   5   -0.84    0.50
   8  -1  -5    0.10    0.20
   8   1  -5    0.10    0.17
  -8   1   5   -0.22    0.47
  -4   0  10   -0.11    0.41
   4   0 -10    0.21    0.47
  -4   0  10   -0.32    0.40
  -4   0  10    0.23    0.28
   4   0 -10    0.53    0.50
   4   0 -10    0.30    0.34
  -4   0  10    0.27    0.19
   3  -3   8    5.66    0.62
  -3   3  -8    6.22    0.56
  -3  -3  -8    6.60    0.69
  -3  -3  -8    6.54    0.58
   3  -3   8    6.19    0.52
  -3  -3  -8    5.75    0.55
  -3   3  -8    6.45    0.62
  -3  -3  -8    6.24    0.76
   3   3   8    6.13    0.61
   3   3   8    6.23    0.47
   3  -3   8    6.03    0.65
   3  -3   8    5.87    0.70
   7  -1  -7    0.69    0.24
  -7  -1   7    1.31    0.42
  -7   1   7    1.36    0.46
   7  -1  -7    0.60    0.44
   7  -1  -7    1.28    0.45
  -7  -1   7    1.04    0.30
  -7   1   7    0.95    0.34
   7   1  -7    1.37    0.45
   7   1  -7    1.40    0.39
  -7  -1   7    1.43    0.56
   7   1  -7    0.95    0.41
   7   1  -7    0.94    0.19
  -7   1   7    1.26    0.38
   1   2  10    2.22    0.51
   1  -2  10    1.96    0.40
  -1  -2 -10    2.09    0.55
   1  -2  10    1.43    0.47
  -1  -2 -10    2.49    0.43
  -1   2 -10    2.31    0.25
  -1   2 -10    1.61    0.40
   1  -2  10    1.88    0.33
  -1  -2 -10    1.98    0.39
   1  -2  10    2.49    0.39
  -1  -2 -10    1.59    0.28
   1   2  10    2.69    0.52
   1   2  10    2.30    0.26
   1  -2  10    1.93    0.16
   9   0   1   22.73    1.19
  -9   0  -1   17.98    1.03
  -9   0  -1   18.65    0.90
   9   0   1   22.31    1.23
  -9   0  -1   21.47    1.03
  -9   0  -1   20.14    1.15
   0  -4   7   17.32    0.85
   0   4   7   17.44    0.87
   0  -4  -7   18.93    1.07
   0  -4   7   17.13    0.96
   0   4   7   17.60    0.96
   0   4  -7   20.28    0.96
   0  -4  -7   17.63    1.13
   0  -4   7   20.19    1.06
   0  -4   7   17.99    1.03
   0  -4   7   18.37    0.88
   0   5  -3   27.40    1.23
   0  -5   3   31.86    1.44
   0  -5   3   32.23    1.44
   0  -5   3   29.66    1.49
   0   5   3   29.59    1.34
   0  -5  -3   29.59    1.55
   0  -5  -3   30.42    1.46
   0  -5   3   28.17    1.32
   0   5   3   28.40    1.45
   3   1  10    6.47    0.47
  -3   1 -10    6.86    0.64
   3  -1  10    6.70    0.62
   3   1  10    7.54    0.72
   3   1  10    7.50    0.81
   3  -1  10    7.87    0.82
  -3  -1 -10    6.45    0.76
  -3   1 -10    7.25    0.72
   3  -1  10    6.30    0.57
  -3   1 -10    5.81    0.54
  -3  -1 -10    7.32    0.67
  -3   1 -10    7.90    0.77
   3   1  10    6.34    0.52
  -3   1 -10    7.61    0.61
  -3  -1 -10    7.13    0.65
  -3  -1 -10    6.12    0.59
   9   0  -2   -0.03    0.16
  -9   0   2    0.18    0.22
   9   0  -2   -0.03    0.25
  -9   0   2    0.44    0.48
   9   0  -2   -0.08    0.34
  -6  -3  -5    2.49    0.20
   6   3   5    1.99    0.53
  -6  -3  -5    3.20    0.43
   6  -3   5    2.30    0.36
   6   3   5    2.61    0.36
  -6  -3  -5    1.96    0.40
   6  -3   5    2.45    0.47
  -6   3  -5    2.43    0.44
  -6   3  -5    1.77    0.41
   6  -3   5    1.82    0.49
  -6  -3  -5    2.01    0.47
  -6  -3  -5    2.53    0.46
  -6   3  -5    2.24    0.25
   2  -5  -2   11.28    0.80
  -2  -5   2   11.85    0.61
   2   5  -2   12.12    0.58
  -2   5   2   10.48    0.84
   2   5  -2   10.65    0.51
  -2  -5   2   11.05    0.79
  -2  -5   2   11.20    0.63
   2  -5  -2   11.86    0.67
   2  -5  -2   12.25    0.78
   2  -5  -2   12.63    0.83
   0   0  11    0.05    0.49
   0   0  11   -0.08    0.29
   0   0 -11   -0.07    0.23
   0   0 -11    0.07    0.27
   0   0 -11   -0.05    0.13
   0   0 -11   -0.23    0.41
   0   0 -11   -0.40    0.51
   0   0  11    0.01    0.40
  -1  -4   7    4.17    0.35
  -1  -4   7    4.20    0.36
  -1  -4   7    3.74    0.32
  -1   4   7    3.95    0.37
   1  -4  -7    3.85    0.62
  -1  -4   7    3.53    0.28
   1  -4  -7    4.35    0.58
  -1  -4   7    3.58    0.47
  -1  -4   7    4.24    0.49
  -1   4   7    3.80    0.54
   0  -3  -9    0.12    0.39
   0  -3   9    1.40    0.23
   0   3   9    1.58    0.32
   0  -3  -9    1.38    0.52
   0   3  -9    0.90    0.19
   0   3   9    1.35    0.51
   0   3  -9    1.91    0.35
   0  -3   9    0.97    0.22
   0  -3   9    1.01    0.16
   0   3   9    0.78    0.45
   0  -3   9    1.01    0.37
   0  -3  -9    1.52    0.21
   0  -3   9    1.55    0.47
   0  -3   9    2.17    0.44
   7   2  -6    6.85    0.63
   7   2  -6    5.98    0.46
  -7   2   6    5.81    0.69
  -7  -2   6    5.94    0.50
   7  -2  -6    6.51    0.56
  -7   2   6    5.95    0.61
   7  -2  -6    6.63    0.77
   7   2  -6    7.94    0.59
  -7  -2   6    7.32    0.72
  -7  -2   6    5.38    0.65
   7   2  -6    7.53    0.69
  -7   2   6    7.60    0.70
   7   2  -6    6.28    0.58
   7  -2  -6    5.56    0.61
  -1   0  11    0.83    0.39
   1   0 -11    1.52    0.52
  -1   0  11    1.13    0.37
   1   0 -11    1.06    0.47
   1   0 -11    0.93    0.23
   1   0 -11    1.37    0.26
   1   0 -11    1.07    0.22
  -1   0  11    0.60    0.50
   6   0   8    8.45    0.74
  -6   0  -8    8.15    0.80
   6   0   8    7.83    0.77
  -6   0  -8    7.51    0.65
  -6   0  -8    7.20    0.51
  -6   0  -8    8.07    0.71
  -6   0  -8    8.02    0.71
  -1  -5   3    0.60    0.17
   1  -5  -3    1.66    0.49
   1   5  -3    0.66    0.15
  -1   5   3    0.56    0.41
   1  -5  -3    0.76    0.48
   1  -5  -3    0.85    0.23
  -1  -5   3    0.37    0.23
  -1  -5   3    0.65    0.39
   1  -5  -3    0.76    0.41
  -1   5   3    0.37    0.27
  -2  -2  10    2.84    0.34
   2   2 -10    2.57    0.23
  -2  -2  10    2.20    0.43
  -2   2  10    2.56    0.42
  -2   2  10    1.89    0.51
   2  -2 -10    1.61    0.43
   2  -2 -10    2.34    0.28
   2   2 -10    1.93    0.36
   2   2 -10    2.08    0.45
  -2   2  10    1.84    0.39
   2  -2 -10    2.44    0.43
  -2  -2  10    2.20    0.48
  -1   3   9    8.54    0.82
   1   3  -9    7.19    0.53
  -1  -3   9    7.81    0.60
   1  -3  -9    7.68    0.74
  -1   3   9    7.46    0.77
   1   3  -9    6.81    0.64
  -1  -3   9    7.24    0.50
   1  -3  -9    8.15    0.84
   1  -3  -9    7.93    0.73
  -1  -3   9    7.09    0.66
  -1   3   9    7.40    0.64
   1  -3  -9    7.06    0.53
  -1  -3   9    6.75    0.71
  -2   5  -2    3.52    0.29
   2   5   2    3.45    0.22
   2  -5   2    3.29    0.37
   2  -5   2    3.46    0.26
  -2  -5  -2    3.54    0.31
   2  -5   2    3.39    0.42
  -2   5  -2    3.67    0.23
   2  -5   2    3.66    0.39
  -2  -5  -2    3.55    0.56
  -2  -5  -2    3.79    0.45
   2   5   2    3.36    0.52
   2  -5   2    3.60    0.41
  -2  -5  -2    3.51    0.33
   4   4   5    6.48    0.47
   4   4   5    5.23    0.67
  -4  -4  -5    5.34    0.67
   4  -4   5    5.47    0.65
   4  -4   5    4.75    0.47
  -4   4  -5    5.45    0.53
  -4  -4  -5    5.52    0.53
  -4   4  -5    5.08    0.42
   4  -4   5    6.72    0.61
   4  -4   5    6.26    0.63
  -4   4  -5    6.29    0.55
  -5  -4   4   12.86    0.77
   5   4  -4   14.58    1.00
  -5   4   4   15.15    0.90
   5  -4  -4   14.10    0.90
  -5  -4   4   15.07    0.69
   5  -4  -4   14.30    0.92
  -5  -4   4   14.59    0.88
   5   4  -4   13.47    0.71
  -5   4   4   14.07    0.88
   5  -4  -4   15.39    0.87
  -5  -4   4   16.29    0.78
  -5   4   4   13.74    0.73
   5  -4  -4   12.23    0.78
   5   0   9   29.11    1.42
  -5   0  -9   28.19    1.28
  -5   0  -9   29.59    1.42
  -5   0  -9   31.31    1.57
   5   0   9   33.02    1.67
   5   0   9   29.35    1.43
  -5  -3   7    0.33    0.44
   5  -3  -7    0.22    0.46
  -5   3   7    0.14    0.24
  -5  -3   7   -0.04    0.23
   5  -3  -7   -0.17    0.35
   5   3  -7    0.57    0.34
   5  -3  -7   -0.70    0.35
   5  -3  -7    0.48    0.48
   5   3  -7    0.34    0.27
  -5  -3   7    0.45    0.40
  -5   3   7    0.36    0.39
  -5   3   7   -0.46    0.32
   5   3  -7    0.07    0.16
  -1  -5  -3    0.73    0.38
   1   5   3    1.44    0.25
   1  -5   3    1.49    0.29
  -1  -5  -3    0.95    0.28
   1  -5   3    0.79    0.30
  -1   5  -3    0.95    0.19
   1  -5   3    0.88    0.37
   1   5   3    1.05    0.41
  -1  -5  -3    0.46    0.52
   1  -5   3    0.74    0.19
  -3   4  -6    3.46    0.25
  -3   4  -6    3.19    0.31
   3  -4   6    3.49    0.23
   3  -4   6    3.18    0.38
  -3  -4  -6    3.84    0.60
   3   4   6    3.16    0.20
   3   4   6    3.87    0.57
   3  -4   6    2.87    0.39
  -3   4  -6    2.79    0.24
  -3  -4  -6    2.92    0.33
   3  -4   6    3.21    0.44
  -5   2  -8    3.37    0.50
   5   2   8    3.03    0.59
  -5   2  -8    3.24    0.22
   5  -2   8    3.49    0.53
  -5  -2  -8    3.18    0.45
  -5  -2  -8    3.65    0.47
   5  -2   8    2.99    0.39
  -5  -2  -8    2.64    0.46
  -5   2  -8    3.84    0.39
   5   2   8    3.49    0.34
  -5  -2  -8    3.51    0.29
   5  -2   8    3.10    0.38
   5  -2   8    3.85    0.51
   1   4   7    0.46    0.23
   1  -4   7    0.48    0.18
  -1  -4  -7    1.19    0.50
   1   4   7    1.18    0.50
   1  -4   7    0.33    0.25
   1  -4   7    0.72    0.32
  -1   4  -7    0.82    0.18
   1  -4   7    0.93    0.36
  -1  -4  -7    0.32    0.53
   1   4   7    0.68    0.44
  -8   0  -5   -0.00    0.30
   8   0   5    0.16    0.33
  -8   0  -5   -0.26    0.35
   8   0   5   -0.04    0.37
   8   0   5   -0.71    0.43
  -8   2  -3   10.63    0.67
   8   2   3    9.46    0.77
  -8  -2  -3    8.15    0.76
   8   2   3   11.07    0.73
  -8  -2  -3   10.46    0.82
  -8  -2  -3    9.77    0.82
  -8   2  -3    9.04    0.67
   8  -2   3    8.67    0.69
   8  -2   3   10.63    0.66
   8  -2   3    7.52    0.80
   8   2   3    9.44    0.83
   7  -3   3   14.30    0.95
  -7  -3  -3   15.82    0.92
   7   3   3   14.24    0.79
   7  -3   3   13.10    0.71
   7   3   3   13.62    0.90
  -7   3  -3   14.62    0.91
   7  -3   3   14.25    0.94
  -7  -3  -3   13.02    0.80
   7  -3   3   13.04    0.70
  -7   3  -3   14.98    0.89
   9   1   0    1.85    0.34
  -9  -1   0    1.96    0.22
   9  -1   0    1.73    0.20
  -9   1   0    2.16    0.25
   9  -1   0    2.31    0.57
  -9  -1   0    2.50    0.56
  -9   1   0    1.68    0.55
  -9  -1   0    1.81    0.25
   9   1   0    1.28    0.35
   9  -1   0    2.15    0.47
  -9   1   0    1.78    0.29
  -9   1   0    1.53    0.52
   9  -1  -1   12.90    0.65
   9   1  -1   15.12    0.90
  -9  -1   1   14.33    0.73
  -9  -1   1   13.14    0.68
   9  -1  -1   14.29    0.90
   9   1  -1   14.25    0.80
  -9   1   1   14.58    0.96
  -9   1   1   12.28    0.69
   9  -1  -1   13.01    0.85
  -9  -1   1   14.92    0.97
  -1   3  -9    6.37    0.57
   1  -3   9    7.97    0.72
   1  -3   9    8.32    0.63
   1   3   9    8.41    0.80
   1   3   9    8.17    0.62
   1  -3   9    7.99    0.62
   1  -3   9    7.87    0.79
  -1  -3  -9    8.26    0.74
  -1  -3  -9    6.73    0.78
  -1   3  -9    8.08    0.58
   1  -3   9    6.94    0.69
  -1  -3  -9    7.10    0.58
   1   3   9    7.81    0.83
  -1   0 -11   30.91    1.54
  -1   0 -11   26.58    1.31
   1   0  11   27.53    1.30
   1   0  11   29.39    1.53
  -1   0 -11   29.64    1.54
   1   0  11   30.77    1.48
  -1   0 -11   31.88    1.48
   6  -2   7    1.25    0.45
  -6  -2  -7    1.55    0.35
  -6  -2  -7    0.75    0.17
   6  -2   7    1.02    0.33
  -6   2  -7    0.85    0.44
   6  -2   7    1.07    0.48
   6   2   7    0.62    0.33
  -6   2  -7    1.57    0.30
  -6  -2  -7    1.14    0.49
  -6   2  -7    0.93    0.37
  -6  -2  -7    1.00    0.42
  -4  -1  10   11.18    0.78
  -4  -1  10   11.20    0.68
   4  -1 -10   11.61    0.69
  -4   1  10   10.44    0.74
   4   1 -10   10.61    0.87
  -4   1  10   10.74    0.65
   4  -1 -10   10.63    0.93
  -4  -1  10   11.57    0.85
  -4   1  10   10.08    0.82
   4  -1 -10    9.80    0.81
   4   1 -10   10.33    0.85
   4   1 -10   10.48    0.91
   4  -1 -10   12.09    0.88
  -4   1  10   10.25    0.89
  -4  -1  10   10.12    0.75
  -6  -4   0   -0.04    0.32
  -6   4   0    0.44    0.37
   6   4   0   -0.07    0.27
  -6   4   0   -0.31    0.40
   6  -4   0   -0.75    0.43
  -6  -4   0    0.27    0.31
  -6  -4   0    0.07    0.14
  -6  -4   0   -0.02    0.29
   6  -4   0    0.50    0.34
   6  -4   0    0.15    0.19
   6  -4   0    0.18    0.34
   6  -4   0   -0.01    0.42
   8  -2  -4    0.16    0.29
  -8   2   4   -0.11    0.35
   8  -2  -4    0.31    0.24
   8   2  -4    0.53    0.24
  -8   2   4    1.08    0.54
  -8  -2   4   -0.39    0.43
  -8   2   4    0.91    0.41
   8   2  -4    0.46    0.36
  -8  -2   4    0.20    0.51
   8  -2  -4    0.43    0.51
   9   0   2    0.46    0.37
   9   0   2   -0.41    0.49
  -9   0  -2   -0.67    0.38
  -9   0  -2   -0.02    0.15
  -9   0  -2    0.10    0.43
  -9   0  -2   -0.25    0.22
   4  -3  -8   77.25    1.43
   4  -3  -8   77.78    1.15
  -4   3   8   78.34    1.34
  -4  -3   8   78.47    1.14
   4   3  -8   71.81    3.16
  -4  -3   8   77.20    0.98
  -4   3   8   76.67    1.31
   6  -4  -1    0.32    0.48
  -6   4   1    0.07    0.38
   6  -4  -1    0.37    0.40
   6  -4  -1    0.29    0.32
  -6   4   1    0.04    0.42
  -6  -4   1    0.32    0.33
  -6  -4   1    0.31    0.12
   6  -4  -1    0.50    0.36
  -6  -4   1    0.06    0.27
   6   4  -1   -0.08    0.40
  -6  -4   1   -0.17    0.38
   6   4  -1    0.45    0.26
  -2   0  11    0.17    0.45
   2   0 -11   -0.28    0.38
  -2   0  11   -0.40    0.34
  -2   0  11   -0.16    0.34
   2   0 -11    0.41    0.49
   2   0 -11   -0.06    0.26
   2   0 -11    0.10    0.26
  -3   5   0    1.06    0.19
   3  -5   0    0.50    0.40
  -3  -5   0    0.99    0.22
  -3   5   0    0.70    0.31
   3   5   0    0.80    0.38
   3  -5   0    0.88    0.35
   3  -5   0    0.47    0.40
  -3  -5   0    0.63    0.44
   3  -5   0    1.37    0.45
  -3  -5   0    1.26    0.30
  -9   0   3    0.14    0.24
   9   0  -3   -0.00    0.17
  -9   0   3    0.69    0.42
   9   0  -3    0.06    0.50
   9   0  -3    0.45    0.22
  -9   0   3    0.23    0.50
   9   0  -3    0.17    0.38
  -8   0   6    8.86    0.70
   8   0  -6   10.72    0.41
  -8   0   6   11.84    0.85
   8   0  -6   10.76    0.56
   8   0  -6   12.25    0.84
  -8   0   6   11.83    0.82
  -2   4   7    0.42    0.42
  -2  -4   7    0.71    0.31
   2  -4  -7    0.59    0.39
  -2  -4   7    1.31    0.18
  -2   4   7    1.36    0.38
  -2  -4   7    0.65    0.25
   2  -4  -7    0.20    0.54
  -2  -4   7    0.59    0.19
  -2  -4   7    0.88    0.33
  -2  -4   7    0.77    0.16
  -9  -1  -1    5.33    0.45
   9  -1   1    6.91    0.70
  -9   1  -1    6.31    0.74
   9  -1   1    5.33    0.69
   9  -1   1    5.73    0.51
  -9   1  -1    5.67    0.46
   9   1   1    5.91    0.60
  -9   1  -1    6.84    0.56
  -9  -1  -1    4.93    0.62
  -9  -1  -1    6.50    0.50
  -9   1  -1    5.90    0.64
   9   1   1    7.26    0.69
   9   1   1    6.01    0.66
  -7   3   4    6.93    0.63
  -7   3   4    4.78    0.62
   7  -3  -4    6.61    0.75
   7   3  -4    7.68    0.65
   7  -3  -4    5.50    0.52
   7   3  -4    7.64    0.66
  -7   3   4    5.49    0.57
  -7  -3   4    5.39    0.43
   7  -3  -4    6.99    0.67
  -7  -3   4    8.09    0.76
   7  -3  -4    5.86    0.63
  -7  -3   4    7.07    0.68
  -9   1   2    0.88    0.49
  -9  -1   2    0.85    0.51
   9   1  -2    0.25    0.37
  -9  -1   2    0.60    0.45
   9   1  -2    0.22    0.26
  -9  -1   2    0.03    0.22
   9  -1  -2    0.03    0.18
  -9   1   2   -0.01    0.25
  -9  -1   2    0.17    0.19
   9   1  -2   -0.13    0.34
   9  -1  -2    0.60    0.40
   6  -3  -6    2.41    0.42
   6  -3  -6    2.35    0.40
  -6  -3   6    2.90    0.45
  -6   3   6    2.78    0.47
   6   3  -6    3.30    0.29
  -6  -3   6    3.24    0.28
   6   3  -6    2.80    0.41
   6  -3  -6    3.30    0.50
  -6   3   6    3.43    0.37
  -6  -3   6    3.66    0.53
   6   3  -6    3.23    0.41
  -6   3   6    2.75    0.53
   6   3  -6    3.19    0.37
  -6   3   6    3.07    0.42
   2  -3  -9    5.47    0.64
  -2   3   9    4.47    0.58
  -2   3   9    5.62    0.59
  -2  -3   9    4.29    0.51
   2   3  -9    3.69    0.37
   2  -3  -9    4.69    0.57
   2   3  -9    4.43    0.37
  -2   3   9    6.19    0.69
  -2  -3   9    3.94    0.32
  -2  -3   9    4.22    0.54
   2   3  -9    4.65    0.53
   2  -3  -9    3.86    0.57
   2  -3  -9    4.37    0.42
  -3  -5   1    5.59    0.51
   3  -5  -1    5.09    0.57
  -3   5   1    5.49    0.53
   3  -5  -1    4.84    0.59
   3  -5  -1    6.72    0.68
  -3  -5   1    5.73    0.46
   3   5  -1    5.87    0.61
   3  -5  -1    5.33    0.53
  -3  -5   1    4.84    0.60
   0   1  11    0.53    0.29
   0   1  11    0.43    0.40
   0  -1 -11    1.14    0.35
   0   1  11    0.59    0.51
   0  -1  11    0.75    0.48
   0   1 -11    0.82    0.49
   0  -1 -11    0.93    0.38
   0  -1  11    1.18    0.38
   0   1 -11    0.80    0.25
   0   1 -11    0.86    0.36
   0  -1 -11    0.84    0.16
   0  -1  11    0.92    0.35
   0   1 -11    0.84    0.16
   0  -1 -11    0.59    0.24
   7   0   7    9.26    0.75
  -7   0  -7    9.10    0.76
   7   0   7    9.72    0.82
  -7   0  -7   10.05    0.91
  -7   0  -7    9.52    0.79
  -7   0  -7    9.22    0.77
   7   0   7    9.61    0.88
  -6  -4  -1    6.10    0.63
  -6   4  -1    5.42    0.56
   6  -4   1    6.47    0.52
   6   4   1    5.55    0.68
   6  -4   1    5.50    0.54
   6   4   1    6.04    0.52
  -6  -4  -1    5.34    0.55
   6  -4   1    5.45    0.53
  -6   4  -1    6.45    0.65
   6  -4   1    5.07    0.62
  -6  -4  -1    6.30    0.46
  -6  -4  -1    6.46    0.64
   6  -4   1    5.21    0.63
   2  -2  10    0.09    0.29
  -2   2 -10    1.22    0.40
   2  -2  10    0.16    0.46
  -2  -2 -10    0.66    0.56
   2   2  10   -0.39    0.53
   2   2  10    0.25    0.18
  -2  -2 -10   -0.02    0.29
  -2   2 -10    0.28    0.19
   2  -2  10    0.10    0.30
  -2  -2 -10   -0.05    0.40
   2   2  10    0.89    0.46
  -2  -2 -10    0.47    0.38
  -2  -5   3    7.55    0.57
   2  -5  -3    7.73    0.61
   2  -5  -3    6.94    0.73
   2  -5  -3    5.38    0.65
  -2  -5   3    7.02    0.70
  -2   5   3    5.22    0.55
   2  -5  -3    6.66    0.63
  -2  -5   3    7.11    0.57
   2   5  -3    6.48    0.46
  -2   5   3    6.41    0.65
  -1  -1  11    0.52    0.46
   1  -1 -11    0.87    0.51
   1   1 -11    0.29    0.38
   1  -1 -11    0.38    0.21
   1  -1 -11    0.30    0.31
  -1  -1  11    0.82    0.35
  -1   1  11    0.30    0.41
   1   1 -11    0.47    0.24
   1  -1 -11    0.59    0.20
   1   1 -11    0.61    0.29
   1  -1 -11    1.28    0.46
  -1  -1  11    0.43    0.35
  -1   1  11    0.88    0.38
  -1   1  11    0.05    0.46
   1   1 -11    0.79    0.50
  -4   2  -9   43.26    1.90
  -4   2  -9   44.12    2.03
   4   2   9   42.49    2.06
  -4  -2  -9   37.86    1.73
   4   2   9   44.32    1.91
  -4  -2  -9   39.91    1.90
   4  -2   9   40.66    1.94
  -4  -2  -9   41.48    1.92
  -4  -2  -9   44.30    2.12
   4  -2   9   40.67    1.87
  -4   2  -9   45.49    2.16
   4   2   9   41.91    1.94
   4  -2   9   43.71    2.08
   4   2   9   40.68    1.84
  -6  -1  -8   52.54    2.39
   6   1   8   57.61    2.60
  -6  -1  -8   59.58    2.66
  -6   1  -8   57.79    2.64
  -6  -1  -8   57.54    2.62
  -6  -1  -8   56.78    2.46
  -6   1  -8   60.06    2.75
  -6  -1  -8   59.29    2.72
   6  -1   8   52.58    2.39
  -6   1  -8   58.86    2.58
   6   1   8   56.45    2.63
  -5   4  -4    1.99    0.39
   5  -4   4    1.83    0.45
   5  -4   4    2.82    0.31
  -5  -4  -4    2.81    0.38
   5   4   4    2.12    0.24
  -5   4  -4    2.45    0.39
   5   4   4    2.29    0.50
  -5  -4  -4    2.52    0.51
   5  -4   4    2.44    0.47
   5  -4   4    1.61    0.36
   5   4   4    2.44    0.19
  -3  -5  -1    3.53    0.25
   3   5   1    4.33    0.34
   3  -5   1    4.10    0.51
   3  -5   1    4.46    0.51
  -3   5  -1    3.91    0.35
   3  -5   1    4.34    0.54
  -3  -5  -1    4.57    0.46
  -3  -5  -1    3.92    0.54
   3   5   1    4.38    0.58
   3  -5   1    4.08    0.53
  -3   5  -1    4.20    0.38
   5   1   9    1.19    0.49
   5  -1   9    1.41    0.35
  -5   1  -9    0.73    0.32
  -5   1  -9    1.78    0.19
  -5  -1  -9    1.79    0.24
  -5  -1  -9    1.39    0.34
  -5  -1  -9    1.90    0.47
  -5  -1  -9    1.76    0.43
   5   1   9    1.69    0.42
   5  -1   9    1.78    0.52
  -5   1  -9    1.80    0.44
  -5   1  -9    1.53    0.29
   5   1   9    1.21    0.30
  -5  -1  -9    1.74    0.35
   5  -1   9    1.20    0.39
  -6   4   2    0.23    0.33
   6  -4  -2    0.78    0.41
  -6   4   2    0.14    0.38
   6  -4  -2    0.21    0.38
   6  -4  -2   -0.03    0.36
   6   4  -2    0.50    0.42
  -6  -4   2    0.16    0.20
  -6  -4   2    0.08    0.37
   6  -4  -2    0.07    0.40
  -6  -4   2   -0.06    0.37
   6   4  -2    0.40    0.26
  -6  -4   2    0.31    0.14
   2  -5   3    0.38    0.32
  -2  -5  -3    0.70    0.28
  -2   5  -3    0.38    0.19
   2  -5   3    0.34    0.17
  -2  -5  -3    0.40    0.21
   2  -5   3    1.23    0.34
  -2  -5  -3    1.07    0.45
  -2   5  -3    0.70    0.17
   2  -5   3    0.27    0.34
   2   5   3   -0.00    0.45
  -2  -5  -3    0.71    0.45
   2   5   3    0.49    0.18
   8  -1   5   -0.09    0.34
   8   1   5    0.46    0.34
   8  -1   5    0.42    0.32
  -8   1  -5    0.15    0.29
  -8  -1  -5    0.21    0.34
  -8  -1  -5    0.14    0.34
  -8   1  -5   -0.09    0.42
  -8   1  -5    0.22    0.23
   8   1   5    0.58    0.39
   8  -1   5    0.01    0.47
  -8   1  -5   -0.20    0.38
  -4   0 -10    0.71    0.39
   4   0  10    0.45    0.29
  -4   0 -10    0.49    0.28
   4   0  10   -0.02    0.41
  -4   0 -10    0.34    0.29
   4   0  10    0.49    0.36
  -4   0 -10    0.21    0.25
   0  -5   4    2.99    0.27
   0   5   4    3.50    0.28
   0  -5   4    3.45    0.30
   0  -5  -4    3.33    0.48
   0  -5   4    2.86    0.23
   0  -5  -4    3.00    0.57
   0   5   4    3.17    0.46
   0  -5   4    3.62    0.44
   0   5  -4    3.49    0.21
   0  -5  -4    3.41    0.26
   0  -5  -4    3.65    0.40
   2  -4   7    1.80    0.40
   2  -4   7    1.97    0.36
  -2   4  -7    1.70    0.14
  -2  -4  -7    1.92    0.31
   2   4   7    1.33    0.45
   2  -4   7    1.87    0.23
  -2   4  -7    2.08    0.23
   2  -4   7    1.85    0.39
  -2   4  -7    2.05    0.24
   2   4   7    1.85    0.23
   2   4   7    2.23    0.54
  -2  -4  -7    1.67    0.51
   3   2 -10   26.14    1.31
   3  -2 -10   26.75    1.39
  -3  -2  10   25.62    1.34
  -3   2  10   25.24    1.26
  -3  -2  10   27.32    1.30
   3   2 -10   26.89    1.23
   3   2 -10   27.03    1.42
  -3  -2  10   27.17    1.40
   3  -2 -10   26.89    1.30
   1  -1  11    2.05    0.29
  -1   1 -11    2.98    0.50
   1   1  11    3.48    0.58
   1  -1  11    1.99    0.37
  -1  -1 -11    3.06    0.37
   1   1  11    1.98    0.45
   1  -1  11    2.96    0.53
  -1   1 -11    2.61    0.43
  -1  -1 -11    1.61    0.38
  -1  -1 -11    2.59    0.44
   1   1  11    2.30    0.29
  -1   1 -11    1.85    0.27
  -3  -5   2    9.26    0.82
  -3  -5   2   10.62    0.80
  -3  -5   2   10.42    0.73
  -3   5   2    9.17    0.75
   3   5  -2   10.79    0.56
   3  -5  -2    9.10    0.82
   3  -5  -2    9.84    0.76
  -3   5   2    9.16    0.78
   3   5  -2   10.18    0.68
   3  -5  -2    9.55    0.83
   3  -5  -2   10.69    0.61
  -6   0   9   -0.25    0.39
  -6   0   9    0.13    0.35
   6   0  -9    0.40    0.45
  -6   0   9   -0.22    0.33
   6   0  -9   -0.12    0.42
   6   0  -9    0.08    0.38
  -6   0   9   -0.34    0.27
   6   0  -9    0.26    0.26
  -4  -4   6    0.53    0.12
  -4   4   6    0.53    0.45
   4  -4  -6    0.68    0.47
  -4  -4   6    0.48    0.33
  -4   4   6    0.44    0.20
   4  -4  -6    0.47    0.39
  -4   4   6    0.42    0.45
  -4  -4   6    0.45    0.21
  -4  -4   6    0.99    0.37
   4  -4  -6   -0.87    0.50
  -1   5   4   -0.06    0.26
   1  -5  -4   -0.23    0.46
   1  -5  -4    0.21    0.38
  -1  -5   4   -0.06    0.17
  -1  -5   4    0.01    0.14
   1  -5  -4   -0.06    0.22
  -1   5   4    0.10    0.40
   1  -5  -4    0.62    0.40
  -1  -5   4    0.04    0.19
   1   5  -4    0.12    0.13
  -1  -5   4    0.24    0.36
   9   1   2    2.98    0.45
  -9  -1  -2    2.63    0.41
   9  -1   2    3.43    0.45
  -9  -1  -2    2.06    0.26
   9   1   2    2.26    0.40
   9  -1   2    2.17    0.57
  -9  -1  -2    2.31    0.47
  -9   1  -2    2.90    0.54
  -9   1  -2    2.40    0.26
  -9   1  -2    2.62    0.27
  -9  -1  -2    2.46    0.20
   9  -1   2    1.50    0.31
  -9   1  -2    1.54    0.45
   9   1   2    2.67    0.44
  -2  -3  -9    6.74    0.58
  -2   3  -9    6.26    0.57
   2  -3   9    7.81    0.61
  -2  -3  -9    7.89    0.72
   2  -3   9    6.80    0.67
   2   3   9    6.63    0.77
   2   3   9    6.75    0.52
   2  -3   9    6.93    0.68
  -2  -3  -9    7.11    0.65
   2   3   9    7.34    0.71
  -2  -3  -9    7.22    0.80
   2  -3   9    5.35    0.58
   2  -3   9    7.32    0.75
  -2   3  -9    6.49    0.58
  -2   0 -11   -0.17    0.31
  -2   0 -11   -0.10    0.34
   2   0  11   -0.02    0.14
   2   0  11   -0.06    0.35
  -2   0 -11    0.21    0.28
   2   0  11   -0.37    0.37
  -2   0 -11    0.72    0.49
  -2  -1  11    8.22    0.75
  -2   1  11    8.30    0.73
   2  -1 -11    8.89    0.81
   2   1 -11    8.64    0.75
   2  -1 -11    8.92    0.85
   2   1 -11    7.88    0.62
  -2  -1  11    8.34    0.70
  -2   1  11    7.67    0.70
   2   1 -11    8.63    0.85
  -2   1  11    8.02    0.81
   2  -1 -11    8.38    0.67
   2   1 -11    9.11    0.79
  -2  -1  11    7.56    0.75
   9  -1  -3    2.87    0.27
  -9   1   3    1.96    0.51
  -9  -1   3    3.11    0.29
   9   1  -3    2.84    0.41
  -9  -1   3    2.91    0.56
   9   1  -3    3.03    0.50
   9  -1  -3    2.22    0.26
  -9   1   3    2.75    0.33
  -9  -1   3    1.76    0.54
   9  -1  -3    2.54    0.52
   9   1  -3    2.39    0.28
   5  -3   7   51.27    2.34
   5   3   7   52.71    2.25
  -5  -3  -7   50.38    2.29
   5   3   7   44.67    2.17
  -5  -3  -7   47.54    2.24
  -5   3  -7   49.01    2.25
   5   3   7   46.01    2.11
  -5   3  -7   50.46    2.22
   5  -3   7   45.72    2.16
  -5  -3  -7   45.88    2.06
   5  -3   7   46.05    2.17
   5  -3   7   46.61    2.13
  -5   3  -7   50.99    2.38
  -6  -4  -2    5.50    0.58
   6   4   2    4.93    0.61
  -6  -4  -2    5.30    0.54
   6  -4   2    5.07    0.63
   6  -4   2    5.62    0.47
  -6   4  -2    5.31    0.60
   6  -4   2    4.73    0.60
  -6   4  -2    5.46    0.59
  -6  -4  -2    5.94    0.62
  -6  -4  -2    5.19    0.39
   6  -4   2    4.33    0.46
   8   1  -6   12.79    0.78
   8  -1  -6   12.62    0.80
   8  -1  -6   13.51    0.72
   8   1  -6   13.37    0.68
  -8   1   6   13.18    0.76
   8   1  -6   13.57    0.87
   8  -1  -6   11.97    0.82
   8  -1  -6   13.44    0.90
  -8  -1   6   12.77    0.89
  -8   1   6   13.67    0.87
   8   1  -6   14.31    0.72
  -8  -1   6   12.71    0.85
  -8   1   6   12.88    0.90
   3  -5   2    0.62    0.33
   3   5   2    0.69    0.44
  -3  -5  -2    0.99    0.45
  -3  -5  -2    0.85    0.24
  -3   5  -2    0.72    0.27
   3  -5   2    1.20    0.40
  -3   5  -2    0.79    0.21
  -3  -5  -2    1.41    0.44
   3  -5   2    0.61    0.37
  -3  -5  -2    0.73    0.29
   3   5   2    0.97    0.16
   3  -5   2    0.93    0.21
   3  -5   2    1.11    0.31
   1  -5   4    4.15    0.49
   1  -5   4    4.12    0.43
   1  -5   4    3.99    0.27
   1   5   4    3.58    0.49
   1   5   4    4.25    0.38
  -1  -5  -4    4.80    0.64
  -1   5  -4    3.51    0.22
  -1  -5  -4    4.20    0.55
  -1  -5  -4    3.88    0.35
   1  -5   4    3.95    0.34
   6   2  -8    2.14    0.38
   6   2  -8    2.23    0.24
  -6   2   8    1.85    0.32
   6  -2  -8    1.79    0.33
  -6   2   8    2.17    0.43
  -6   2   8    1.76    0.53
  -6  -2   8    1.91    0.52
   6  -2  -8    1.68    0.41
  -6  -2   8    1.85    0.31
   6   2  -8    2.23    0.44
   6   2  -8    1.96    0.37
  -6  -2   8    1.92    0.46
   7  -2   6    1.19    0.36
   7   2   6    1.30    0.36
   7  -2   6    1.64    0.41
  -7   2  -6    1.17    0.46
  -7  -2  -6    1.09    0.36
  -7  -2  -6    0.92    0.41
   7  -2   6    0.83    0.49
  -7   2  -6    1.31    0.45
  -7  -2  -6    1.16    0.37
  -7  -2  -6    0.88    0.13
  -7   1  -7    1.80    0.34
   7  -1   7    1.31    0.34
   7   1   7    1.37    0.46
   7   1   7    1.40    0.34
   7  -1   7    2.07    0.49
  -7  -1  -7    1.49    0.39
  -7   1  -7    1.66    0.44
  -7   1  -7    0.44    0.49
  -7  -1  -7    2.28    0.44
   7  -1   7    0.63    0.43
  -7  -1  -7    0.44    0.40
  -7  -1  -7    1.71    0.15
  -7  -1  -7    1.36    0.34
  -7   0   8   -0.34    0.51
   7   0  -8    0.11    0.41
   7   0  -8   -0.14    0.41
  -7   0   8   -0.06    0.30
   7   0  -8   -0.25    0.45
   7   0  -8   -0.16    0.23
  -9   0  -3   18.08    0.97
   9   0   3   17.73    1.09
  -9   0  -3   15.17    0.78
  -9   0  -3   17.35    1.10
   9   0   3   15.22    0.92
  -9   0  -3   16.07    1.01
   5   4  -5    1.57    0.27
  -5  -4   5    1.29    0.35
   5  -4  -5    1.74    0.49
   5  -4  -5    1.13    0.33
  -5  -4   5    1.31    0.35
  -5  -4   5    0.98    0.13
   5  -4  -5    1.64    0.49
  -5   4   5    0.34    0.45
  -5   4   5    0.64    0.22
   5  -4  -5    1.07    0.40
  -5   4   5    0.97    0.44
  -5  -4   5    0.56    0.19
  -7  -3  -4   15.35    0.76
   7  -3   4   14.71    0.96
  -7   3  -4   15.31    0.81
  -7   3  -4   15.43    0.98
   7   3   4   15.22    0.88
  -7   3  -4   15.26    0.96
   7  -3   4   14.97    0.86
  -7  -3  -4   14.99    0.92
  -7  -3  -4   14.84    0.91
   7  -3   4   13.98    0.93
  -7  -3  -4   14.06    0.89
   7   3   4   15.65    1.00
  -8   2  -4   14.94    0.88
  -8  -2  -4   16.77    1.03
  -8  -2  -4   16.21    0.97
   8   2   4   15.76    0.92
   8   2   4   17.75    1.08
   8  -2   4   15.74    0.98
   8  -2   4   16.96    1.08
  -8  -2  -4   17.22    0.99
   8  -2   4   16.96    0.97
  -8   2  -4   16.70    1.03
  -8   2  -4   16.86    1.06
   4   3   8    2.66    0.17
   4  -3   8    2.68    0.44
  -4   3  -8    2.39    0.30
   4   3   8    2.61    0.25
   4  -3   8    2.08    0.47
  -4  -3  -8    3.03    0.48
  -4   3  -8    2.82    0.40
   4  -3   8    2.84    0.30
   4  -3   8    3.16    0.66
   4   3   8    3.04    0.44
  -4  -3  -8    2.57    0.30
  -4  -3  -8    2.50    0.57
  -9   0   4   -0.12    0.47
  -9   0   4    0.04    0.21
   9   0  -4   -0.09    0.19
   9   0  -4    0.13    0.49
  -9   0   4    0.29    0.46
   9   0  -4   -0.23    0.19
   9   0  -4    0.09    0.42
   3   0 -11   10.56    0.78
  -3   0  11   10.41    0.78
  -3   0  11    9.73    0.68
   3   0 -11   10.67    0.80
   3   0 -11   11.10    0.73
  -3   0  11   10.77    0.77
  -5  -2   9    0.97    0.48
   5   2  -9    0.65    0.36
   5   2  -9    0.59    0.33
  -5   2   9    1.01    0.43
   5  -2  -9    0.71    0.33
  -5  -2   9    0.36    0.27
  -5   2   9    0.91    0.23
   5  -2  -9    1.18    0.36
  -5  -2   9    0.65    0.37
   5   2  -9    0.52    0.42
  -5   2   9    0.10    0.41
  -5  -2   9    0.82    0.32
  -5   2   9    0.69    0.46
   5  -2  -9    0.64    0.50
   6  -4  -3    1.39    0.48
  -6  -4   3    1.79    0.42
  -6  -4   3    2.15    0.40
  -6  -4   3    2.05    0.21
   6  -4  -3    1.12    0.35
  -6   4   3    1.06    0.43
   6   4  -3    1.96    0.29
  -6  -4   3    1.49    0.15
   6  -4  -3    1.63    0.41
   6  -4  -3    1.75    0.39
  -6   4   3    1.80    0.35
   6   4  -3    1.89    0.43
  -3  -4   7   13.48    0.84
   3  -4  -7   16.07    0.96
  -3  -4   7   15.06    0.79
  -3  -4   7   11.78    0.73
  -3  -4   7   14.54    0.71
   3  -4  -7   13.38    0.92
   3  -4  -7   12.18    0.85
  -3   4   7   14.04    0.88
   5   0 -10   -0.06    0.20
   5   0 -10    0.26    0.45
  -5   0  10    0.04    0.20
   5   0 -10   -0.13    0.38
  -5   0  10    0.08    0.46
  -5   0  10    0.04    0.31
  -5   0  10   -0.34    0.36
   5   0 -10    0.04    0.46
  -3  -3   9    0.66    0.26
  -3   3   9    0.07    0.46
   3  -3  -9    0.29    0.34
   3  -3  -9    0.85    0.38
  -3  -3   9    0.60    0.39
   3  -3  -9    0.42    0.30
   3   3  -9    0.71    0.18
  -3  -3   9    0.53    0.51
   3   3  -9    0.62    0.39
   3  -3  -9    0.25    0.57
  -3   3   9    0.69    0.48
   3   3  -9    0.47    0.28
  -3  -3   9    0.79    0.36
  -3   3   9    0.49    0.39
  -4   1 -10    0.51    0.41
   4   1  10    0.63    0.26
   4  -1  10    0.15    0.33
  -4   1 -10    0.15    0.42
  -4  -1 -10    0.46    0.36
   4   1  10    0.26    0.12
   4  -1  10    0.21    0.28
   4  -1  10    0.23    0.51
  -4  -1 -10    0.24    0.52
  -4  -1 -10    0.57    0.34
   4   1  10   -0.03    0.42
  -4   1 -10   -0.20    0.40
  -4   1 -10    0.18    0.22
   4   1  10    0.26    0.52
  -4  -1 -10   -0.06    0.27
  -4   1 -10    0.58    0.37
  -6  -3  -6   20.96    1.16
  -6   3  -6   20.93    1.18
  -6  -3  -6   23.51    1.14
   6  -3   6   21.55    1.18
   6  -3   6   19.93    1.18
  -6   3  -6   23.28    1.17
   6   3   6   23.02    1.33
  -6  -3  -6   22.91    1.30
   6   3   6   23.52    1.21
  -6  -3  -6   20.49    1.19
   6  -3   6   21.70    1.25
  -6   3  -6   23.63    1.31
  -6  -3  -6   22.39    1.23
   8   2  -5   10.83    0.64
  -8  -2   5   11.67    0.84
   8  -2  -5   12.32    0.71
   8  -2  -5   13.21    0.94
   8   2  -5   12.11    0.74
   8   2  -5   12.26    0.79
  -8  -2   5   11.22    0.81
   8  -2  -5   11.23    0.83
  -8   2   5   12.04    0.88
  -8   2   5   12.06    0.78
  -8   2   5   12.82    0.85
  -2  -5   4    3.81    0.25
  -2   5   4    3.61    0.37
   2  -5  -4    3.92    0.47
  -2  -5   4    3.35    0.54
   2  -5  -4    4.34    0.52
  -2   5   4    3.72    0.47
   2  -5  -4    4.15    0.57
  -2  -5   4    3.35    0.29
   2  -5  -4    3.44    0.30
  -2  -5   4    3.92    0.22
  -2   5   4    3.97    0.41
   6   1  -9   -0.08    0.40
   6  -1  -9    0.50    0.40
  -6   1   9   -0.04    0.31
   6   1  -9    0.26    0.18
   6  -1  -9   -0.00    0.22
   6  -1  -9    0.08    0.47
   6   1  -9   -0.07    0.37
   6   1  -9    0.67    0.40
   6  -1  -9    0.52    0.47
  -6   1   9    0.26    0.34
  -6   1   9   -0.10    0.37
  -6   1   9    0.04    0.47
  -6  -1   9    0.08    0.32
  -6  -1   9    0.08    0.41
  -6  -1   9   -0.41    0.24
  -6  -1   9    0.30    0.32
  -3  -5   3    4.77    0.46
  -3  -5   3    4.73    0.25
   3  -5  -3    4.61    0.41
  -3   5   3    4.74    0.25
  -3   5   3    4.79    0.44
  -3   5   3    4.43    0.47
   3  -5  -3    3.86    0.49
   3  -5  -3    4.08    0.53
   3   5  -3    4.42    0.35
  -3  -5   3    3.97    0.49
  -3  -5   3    4.75    0.35
   3  -5  -3    4.24    0.50
   4   4   6   23.99    1.37
   4  -4   6   25.67    1.24
  -4   4  -6   27.60    1.34
  -4  -4  -6   29.06    1.59
  -4   4  -6   26.75    1.34
   4  -4   6   26.16    1.40
  -4  -4  -6   26.17    1.34
   4  -4   6   27.79    1.43
   4  -4   6   28.27    1.53
   4   4   6   28.13    1.33
  -4   4  -6   26.96    1.39
  -4  -4  -6   25.77    1.30
  -7   3   5    4.58    0.43
   7  -3  -5    4.19    0.45
   7  -3  -5    5.36    0.41
  -7   3   5    4.13    0.45
   7   3  -5    5.00    0.41
   7   3  -5    5.28    0.47
   7   3  -5    4.92    0.37
  -7  -3   5    4.72    0.51
   7  -3  -5    4.49    0.58
  -7  -3   5    4.94    0.55
  -7  -3   5    4.97    0.31
  -7   3   5    5.12    0.59
   7   3  -5    4.19    0.34
   2   1  11   10.62    0.84
   2  -1  11    9.07    0.56
  -2   1 -11   10.40    0.78
  -2   1 -11    9.76    0.71
  -2   1 -11   10.20    0.61
  -2  -1 -11   10.14    0.68
  -2   1 -11   10.56    0.83
   2  -1  11    9.29    0.66
   2  -1  11    9.69    0.74
   2   1  11   11.05    0.77
   2  -1  11    8.65    0.48
  -2  -1 -11    7.90    0.62
   2   1  11    9.81    0.56
  -2  -1 -11    9.81    0.69
  -7  -2   7    9.54    0.76
   7   2  -7    9.19    0.66
   7  -2  -7    9.82    0.74
  -7   2   7   10.55    0.71
  -7  -2   7    8.63    0.54
   7  -2  -7    9.86    0.63
  -7   2   7    9.24    0.68
   7   2  -7    9.60    0.71
  -7  -2   7    9.93    0.75
   7   2  -7   10.18    0.57
  -7   2   7   10.37    0.69
   7   2  -7    8.98    0.50
   7   2  -7   10.37    0.73
  -7   2   7    9.81    0.78
   7  -2  -7    8.97    0.73
   8  -3   0   10.01    0.74
   8   3   0   12.87    0.80
   8  -3   0   13.64    0.76
  -8  -3   0   12.27    0.72
   8  -3   0   12.49    0.88
   8   3   0   14.06    0.87
   8  -3   0   13.21    0.73
  -8   3   0   12.77    0.80
  -8   3   0   12.00    0.83
  -8  -3   0   11.90    0.82
  -8  -3   0   11.73    0.83
  -8   3   0   13.59    0.88
  -8   3   1    3.96    0.54
   8   3  -1    3.23    0.40
  -8  -3   1    3.19    0.27
  -8  -3   1    3.40    0.52
   8  -3  -1    2.92    0.52
  -8   3   1    3.29    0.44
   8  -3  -1    3.50    0.29
   8  -3  -1    3.33    0.35
  -8   3   1    3.19    0.41
   8  -3  -1    3.20    0.54
  -8  -3   1    4.06    0.49
   8   3  -1    3.73    0.39
   8  -3  -1    2.97    0.25
   8   3  -1    3.82    0.47
  -3   2 -10    2.48    0.43
  -3  -2 -10    2.68    0.38
  -3   2 -10    2.58    0.40
  -3  -2 -10    3.00    0.36
  -3  -2 -10    3.07    0.59
   3   2  10    3.16    0.47
  -3  -2 -10    3.09    0.40
   3   2  10    2.91    0.20
   3   2  10    2.30    0.49
   3  -2  10    2.48    0.51
   3  -2  10    2.69    0.39
  -3   2 -10    3.43    0.25
   3  -2  10    3.01    0.37
  -2  -5  -4   12.18    0.70
   2  -5   4   11.08    0.62
  -2  -5  -4   11.25    0.85
   2   5   4   11.59    0.84
   2   5   4   10.87    0.58
  -2   5  -4   11.68    0.64
  -2  -5  -4   11.51    0.69
   2  -5   4   10.75    0.69
  -2   5  -4   11.91    0.64
  -2  -5  -4   12.04    0.83
   2  -5   4   11.31    0.72
   2  -5   4   12.38    0.76
  -8   0  -6    6.50    0.53
  -8   0  -6    6.40    0.58
   8   0   6    8.00    0.68
  -8   0  -6    7.14    0.56
   8   0   6    6.55    0.57
  -8   0  -6    7.06    0.69
   8   0   6    6.49    0.60
  -7  -1   8    0.56    0.29
   7  -1  -8    0.59    0.28
   7   1  -8    0.85    0.41
  -7   1   8    0.52    0.35
  -7  -1   8    0.49    0.38
   7  -1  -8    0.82    0.43
   7   1  -8    1.00    0.47
  -7   1   8    0.54    0.33
  -7  -1   8    0.42    0.49
  -7   1   8    0.46    0.39
   7  -1  -8    0.58    0.44
   7   1  -8    0.96    0.43
   7   1  -8    0.63    0.20
  -3  -5  -3    4.99    0.59
  -3   5  -3    4.92    0.34
   3  -5   3    4.37    0.45
  -3  -5  -3    5.04    0.44
   3  -5   3    4.96    0.44
  -3  -5  -3    5.06    0.33
   3   5   3    5.08    0.23
  -3  -5  -3    4.98    0.37
   3  -5   3    4.88    0.41
  -3   5  -3    5.01    0.29
   3  -5   3    4.30    0.40
   3   5   3    4.55    0.52
   3  -5   3    5.01    0.30
  -9   1  -3    0.15    0.18
  -9   1  -3    0.36    0.45
   9   1   3   -0.23    0.35
  -9  -1  -3   -0.07    0.37
   9  -1   3   -0.32    0.35
   9   1   3   -0.20    0.36
  -9  -1  -3   -0.18    0.23
  -9   1  -3    0.10    0.23
   9  -1   3   -0.31    0.33
  -9  -1  -3   -0.03    0.46
   9  -1   3    0.53    0.44
   9   1   3    0.14    0.43
   6  -4   3   40.69    1.94
  -6   4  -3   43.13    2.14
  -6  -4  -3   44.79    2.19
   6  -4   3   41.14    2.09
  -6   4  -3   42.98    2.11
   6   4   3   42.76    2.18
  -6  -4  -3   42.46    2.12
   6  -4   3   45.18    2.25
   6  -4   3   41.03    1.99
   4  -5   0   12.43    0.80
   4  -5   0   11.90    0.81
  -4   5   0   12.89    0.71
  -4  -5   0   11.99    0.83
  -4  -5   0   12.64    0.77
   4  -5   0   12.54    0.81
  -4  -5   0   12.27    0.65
  -4   5   0   12.15    0.76
   4   5   0   11.94    0.82
   4  -5   0   12.37    0.83
   9  -1  -4   26.49    1.31
   9   1  -4   27.96    1.34
   9  -1  -4   26.52    1.31
   9   1  -4   27.92    1.37
  -9   1   4   25.86    1.46
  -9  -1   4   27.76    1.51
   9  -1  -4   24.78    1.36
   9   1  -4   30.51    1.59
   9   1  -4   27.16    1.45
  -9  -1   4   26.20    1.30
  -9   1   4   27.59    1.51
  -9  -1   4   27.68    1.50
  -9   1   4   26.55    1.35
   9  -1  -4   29.64    1.60
   3   1 -11   11.68    0.86
  -3  -1  11   11.33    0.82
   3   1 -11   10.87    0.76
   3   1 -11   10.91    0.76
   3  -1 -11   11.95    0.91
   3   1 -11   11.15    0.65
  -3   1  11   11.99    0.86
  -3  -1  11   10.80    0.68
  -3   1  11   10.19    0.72
  -3   1  11   11.29    0.79
   3  -1 -11   11.02    0.82
  -3  -1  11   11.79    0.84
   3  -1 -11    9.94    0.65
   0  -4   8    0.14    0.29
   0  -4  -8   -0.61    0.44
   0   4  -8    0.16    0.17
   0  -4   8    0.25    0.18
   0  -4   8    0.54    0.31
   0  -4  -8    0.64    0.56
   0  -4   8    0.31    0.18
   0  -4   8    0.51    0.42
   0   4   8    0.38    0.27
   0   4   8    0.32    0.38
   0  -4  -8   -0.08    0.39
  -5   4  -5    4.26    0.41
   5  -4   5    3.94    0.50
   5   4   5    3.76    0.19
   5  -4   5    3.14    0.45
  -5   4  -5    3.37    0.38
   5   4   5    2.69    0.52
  -5  -4  -5    4.29    0.46
   5   4   5    3.48    0.26
  -5   4  -5    4.33    0.28
  -5  -4  -5    3.50    0.40
   5  -4   5    3.42    0.40
   5  -4   5    3.87    0.36
  -5  -4  -5    3.87    0.54
   4  -5  -1   10.79    0.77
  -4  -5   1   11.24    0.79
   4  -5  -1   11.31    0.74
   4  -5  -1   11.01    0.78
   4  -5  -1   11.13    0.76
  -4  -5   1   11.26    0.74
  -4   5   1   11.92    0.77
  -4  -5   1   12.08    0.64
   4   5  -1   12.15    0.83
  -4  -5   1   13.04    0.78
  -8   3  -1    0.45    0.44
   8  -3   1    0.22    0.19
   8   3   1   -0.15    0.39
  -8  -3  -1    0.57    0.28
   8  -3   1    0.26    0.38
  -8  -3  -1   -0.03    0.37
   8  -3   1    0.16    0.23
   8   3   1    0.31    0.30
  -8   3  -1   -0.01    0.34
  -8  -3  -1    0.03    0.31
   8  -3   1   -0.00    0.46
  -3   4  -7    4.97    0.33
   3  -4   7    5.31    0.29
  -3  -4  -7    4.52    0.55
   3  -4   7    4.93    0.46
   3   4   7    4.86    0.60
   3   4   7    5.13    0.25
  -3   4  -7    5.12    0.24
   3  -4   7    5.04    0.41
  -3  -4  -7    5.04    0.35
  -3   4  -7    4.96    0.29
   3  -4   7    4.99    0.48
   5  -1 -10    0.47    0.30
  -5   1  10    0.38    0.35
  -5   1  10   -0.07    0.37
  -5   1  10    0.25    0.24
  -5  -1  10   -0.34    0.52
  -5  -1  10    0.34    0.27
  -5   1  10    0.51    0.39
   5  -1 -10   -0.08    0.38
   5   1 -10    0.52    0.51
   5   1 -10    0.23    0.37
   5   1 -10    0.60    0.39
  -5  -1  10    0.37    0.36
   5  -1 -10   -0.15    0.33
  -5  -1  10    0.21    0.31
   5  -1 -10    1.16    0.50
  -1   4   8    1.37    0.33
   1  -4  -8    1.39    0.38
  -1  -4   8    1.60    0.35
  -1   4   8    1.44    0.40
   1  -4  -8    1.25    0.44
  -1  -4   8    1.23    0.21
   1  -4  -8    1.36    0.21
  -1  -4   8    1.72    0.33
  -1  -4   8    1.21    0.25
  -1  -4   8    1.41    0.39
   1  -4  -8    1.12    0.48
  -1  -4   8    1.54    0.18
   8  -3  -2   52.42    2.57
  -8  -3   2   54.32    2.64
   8  -3  -2   59.96    0.87
  -8  -3   2   59.01    1.13
  -8   3   2   59.36    1.19
   8   3  -2   59.24    1.03
  -8   3   2   52.74    2.53
  -8  -3   2   56.20    2.62
   8  -3  -2   56.87    2.67
  -8   3   2   53.23    2.61
   8  -3  -2   56.07    2.67
   8   3  -2   60.20    1.10
  -9  -2   0    0.77    0.49
   9  -2   0    0.40    0.52
   9   2   0    0.65    0.37
   9  -2   0    0.79    0.26
  -9  -2   0    0.35    0.22
   9  -2   0    0.11    0.47
   9   2   0    0.63    0.34
  -9  -2   0   -0.00    0.16
   9  -2   0    0.10    0.18
  -9   2   0    0.31    0.31
  -9   2   0    1.10    0.54
   4   5   1    7.73    0.64
   4  -5   1    7.62    0.61
   4  -5   1    9.07    0.69
  -4  -5  -1    9.17    0.76
  -4   5  -1    8.69    0.61
  -4   5  -1   10.57    0.63
   4  -5   1    9.35    0.67
   4  -5   1   10.59    0.61
   4   5   1    9.58    0.50
  -4  -5  -1   10.51    0.68
   4  -5   1    9.15    0.66
  -4  -5  -1   10.44    0.58
   9  -2  -1   12.01    0.86
  -9   2   1   11.30    0.85
  -9   2   1   10.87    0.68
   9  -2  -1   10.96    0.62
  -9  -2   1   11.82    0.82
   9   2  -1   11.88    0.76
   9   2  -1   12.13    0.79
  -9  -2   1   11.52    0.86
   9  -2  -1    9.92    0.73
  -9   2   1   10.90    0.82
  -9  -2   1   11.34    0.64
   9   2  -1   11.88    0.80
  -9  -2   1   11.03    0.60
   0   5   5    6.74    0.45
   0  -5  -5    6.60    0.67
   0  -5  -5    5.54    0.26
   0  -5  -5    6.64    0.57
   0  -5  -5    6.15    0.68
   0  -5   5    5.34    0.34
   0  -5   5    6.14    0.43
   0  -5   5    6.45    0.44
   0   5   5    5.47    0.47
   0   5  -5    6.88    0.39
   0  -5   5    6.52    0.52
   5   3  -8    6.82    0.56
   5  -3  -8    5.35    0.43
  -5  -3   8    6.91    0.62
  -5  -3   8    6.38    0.45
  -5   3   8    8.06    0.51
   5  -3  -8    7.16    0.69
   5   3  -8    6.88    0.50
   5  -3  -8    6.30    0.54
  -5   3   8    6.44    0.62
  -5  -3   8    6.41    0.60
  -5   3   8    5.88    0.57
   8   0  -7    0.11    0.43
   8   0  -7    0.28    0.38
   8   0  -7    0.24    0.22
  -8   0   7    0.06    0.40
  -8   0   7    0.31    0.52
   3   3   9    3.28    0.48
   3  -3   9    3.08    0.46
  -3   3  -9    3.49    0.34
   3  -3   9    3.17    0.48
  -3   3  -9    3.72    0.41
  -3  -3  -9    3.32    0.51
   3   3   9    3.26    0.23
  -3  -3  -9    3.74    0.44
   3  -3   9    3.01    0.28
  -3  -3  -9    3.52    0.50
  -3  -3  -9    2.87    0.37
  -4   2  10    7.63    0.45
   4  -2 -10    7.77    0.58
  -4  -2  10    7.48    0.54
   4  -2 -10    7.01    0.56
  -4   2  10    7.17    0.66
   4   2 -10    6.30    0.41
  -4  -2  10    6.11    0.45
  -4  -2  10    6.69    0.60
  -4   2  10    7.16    0.57
   4  -2 -10    6.94    0.66
   4   2 -10    6.86    0.57
   4   2 -10    6.97    0.54
   4   2 -10    7.23    0.68
  -4   2  10    6.75    0.63
  -4  -2  10    7.04    0.68
  -3   0 -11    2.41    0.43
  -3   0 -11    2.12    0.33
   3   0  11    2.14    0.41
  -3   0 -11    2.03    0.36
  -3   0 -11    3.16    0.53
   3   0  11    2.31    0.16
   3   0  11    2.34    0.27
   3   0  11    2.39    0.55
  -1  -5   5    0.11    0.21
   1  -5  -5   -0.10    0.51
   1   5  -5    0.27    0.12
   1  -5  -5   -0.06    0.31
   1  -5  -5    0.09    0.22
  -1  -5   5    0.27    0.17
  -1  -5   5    0.10    0.17
  -1   5   5    0.16    0.39
  -1  -5   5    0.20    0.14
  -1   5   5    0.29    0.24
  -1  -5   5   -0.00    0.28
   1  -5  -5   -0.23    0.45
  -6  -3   7    2.76    0.46
  -6   3   7    3.32    0.44
   6  -3  -7    3.46    0.52
  -6   3   7    3.25    0.42
  -6   3   7    3.09    0.53
   6   3  -7    2.60    0.32
   6   3  -7    3.68    0.26
  -6  -3   7    3.60    0.49
   6   3  -7    2.97    0.36
   6  -3  -7    2.84    0.55
   6   3  -7    3.57    0.43
   6  -3  -7    3.23    0.38
  -6  -3   7    3.18    0.29
  -6   3   7    3.06    0.30
   6  -3  -7    2.97    0.42
  -6  -4   4    2.16    0.42
   6   4  -4    2.27    0.29
  -6  -4   4    1.60    0.37
   6   4  -4    1.97    0.40
   6  -4  -4    2.20    0.41
  -6  -4   4    2.08    0.16
   6  -4  -4    1.90    0.38
  -6   4   4    2.50    0.40
   6  -4  -4    2.18    0.36
  -6   4   4    1.98    0.31
  -6  -4   4    2.30    0.23
   6  -4  -4    2.01    0.50
  -1   4  -8    6.04    0.41
   1  -4   8    6.52    0.48
  -1  -4  -8    6.90    0.73
  -1  -4  -8    6.69    0.57
   1  -4   8    6.82    0.44
   1  -4   8    5.87    0.57
   1   4   8    7.00    0.63
   1   4   8    7.05    0.47
  -1  -4  -8    6.88    0.59
   1  -4   8    6.14    0.53
   1  -4   8    5.71    0.48
  -9   0  -4    0.02    0.26
   9   0   4   -0.32    0.33
   9   0   4   -0.32    0.43
  -9   0  -4   -0.06    0.13
  -9   0  -4    0.01    0.41
   4  -5  -2    1.03    0.32
   4  -5  -2    2.27    0.44
  -4   5   2    1.20    0.36
  -4  -5   2    1.72    0.20
   4  -5  -2    1.40    0.39
   4   5  -2    1.24    0.36
  -4  -5   2    1.05    0.34
  -4  -5   2    1.12    0.39
  -4   5   2    1.05    0.39
  -4  -5   2    0.87    0.31
   4  -5  -2    2.10    0.42
   9  -2   1   26.20    1.32
  -9  -2  -1   27.32    1.36
  -9   2  -1   26.23    1.35
  -9  -2  -1   25.48    1.40
   9  -2   1   24.93    1.38
   9  -2   1   27.61    1.34
   9   2   1   26.68    1.43
  -9   2  -1   26.87    1.49
   9   2   1   26.40    1.41
   9  -2   1   25.28    1.43
  -9   2  -1   25.36    1.41
  -1   5  -5    1.98    0.17
   1  -5   5    1.93    0.30
  -1  -5  -5    2.19    0.55
   1  -5   5    1.70    0.26
  -1  -5  -5    2.67    0.26
   1   5   5    1.99    0.21
   1  -5   5    1.95    0.30
   1   5   5    2.19    0.47
  -1  -5  -5    2.58    0.51
  -1  -5  -5    1.99    0.31
   1  -5   5    1.87    0.29
   9  -2  -2   20.84    1.23
   9   2  -2   19.05    1.05
  -9   2   2   17.76    0.99
   9   2  -2   18.72    1.06
   9   2  -2   22.12    1.21
  -9  -2   2   19.78    1.00
   9  -2  -2   18.63    0.96
  -9  -2   2   19.26    1.16
  -9  -2   2   18.49    0.94
   9  -2  -2   19.40    1.18
  -9  -2   2   17.86    1.04
  -9   2   2   20.23    1.18
   0  -2 -11   11.64    0.85
   0  -2  11   14.24    0.82
   0  -2 -11   11.69    0.67
   0  -2 -11   16.04    0.82
   0  -2 -11   13.36    0.80
   0   2  11   13.97    0.88
   0  -2  11   15.06    1.01
   0  -2  11   13.06    0.82
   0  -2 -11   13.14    0.87
   0   2 -11   13.41    0.88
   0   2 -11   13.56    0.83
   0   2  11   13.66    0.80
   0   2 -11   14.58    0.78
   0   2  11   14.16    0.98
  -8   1  -6    4.06    0.36
  -8   1  -6    4.46    0.41
  -8  -1  -6    4.87    0.43
  -8  -1  -6    4.20    0.43
   8  -1   6    4.04    0.49
  -8   1  -6    4.18    0.53
  -8  -1  -6    3.83    0.38
   8  -1   6    3.64    0.38
   8   1   6    4.82    0.43
   8   1   6    3.70    0.39
   8  -1   6    3.33    0.50
  -8   1  -6    4.14    0.53
   9   0  -5    4.81    0.57
   9   0  -5    6.51    0.59
   9   0  -5    3.93    0.25
  -9   0   5    4.76    0.52
   9   0  -5    5.73    0.40
   9   0  -5    5.76    0.51
  -9   0   5    5.75    0.42
  -9   0   5    5.37    0.51
   6   0   9   -0.52    0.31
  -6   0  -9    0.14    0.13
  -6   0  -9   -0.13    0.26
  -6   0  -9   -0.13    0.28
  -6   0  -9    0.31    0.47
   6   0   9    0.14    0.42
   6   0   9   -0.52    0.28
  -6   0  -9    0.10    0.40
   1   2 -11   21.78    1.09
   1   2 -11   21.88    1.27
   1   2 -11   20.66    1.14
  -1  -2  11   20.91    1.20
   1  -2 -11   22.35    1.27
  -1  -2  11   21.69    1.27
  -1   2  11   21.33    1.16
  -1   2  11   22.92    1.26
  -1  -2  11   23.21    1.21
   6  -2   8    0.89    0.35
   6  -2   8    0.44    0.30
  -6  -2  -8    0.31    0.38
  -6  -2  -8    0.81    0.18
   6  -2   8    0.62    0.45
  -6   2  -8    0.66    0.42
  -6  -2  -8    0.55    0.33
   6   2   8    0.74    0.29
  -6  -2  -8    1.16    0.43
  -6   2  -8    0.03    0.28
  -6  -2  -8    0.51    0.32
   8  -3   2   10.93    0.80
  -8   3  -2   10.88    0.80
  -8  -3  -2   13.89    0.83
  -8  -3  -2   14.37    0.90
   8   3   2   13.76    0.91
   8  -3   2   12.71    0.73
   8  -3   2   14.66    1.00
  -3   5   4    5.41    0.25
  -3   5   4    4.01    0.42
  -3  -5   4    4.51    0.44
   3  -5  -4    4.86    0.57
  -3  -5   4    4.87    0.36
   3  -5  -4    5.10    0.38
   3  -5  -4    3.17    0.47
  -3   5   4    3.39    0.48
  -3  -5   4    4.86    0.25
  -3   5   4    5.56    0.48
   3  -5  -4    4.84    0.49
  -2  -4   8    1.13    0.21
  -2  -4   8    0.90    0.33
  -2   4   8    1.16    0.50
   2  -4  -8    1.37    0.45
  -2  -4   8    0.85    0.28
   2  -4  -8    1.58    0.27
   2  -4  -8    1.44    0.45
  -2  -4   8    1.05    0.58
  -2  -4   8    1.28    0.16
  -2   4   8    1.68    0.37
  -2  -4   8    1.24    0.19
  -4  -5  -2   -0.04    0.40
   4  -5   2   -0.10    0.18
   4  -5   2   -0.05    0.30
   4   5   2    0.18    0.13
  -4  -5  -2   -0.32    0.15
  -4   5  -2    0.24    0.22
   4   5   2    0.30    0.40
  -4  -5  -2    0.01    0.32
   4  -5   2    0.14    0.35
   4  -5   2    0.06    0.32
   4  -5   2    0.00    0.36
  -4   5  -2    0.31    0.28
  -5  -2  -9   17.84    1.03
  -5   2  -9   16.06    1.00
   5   2   9   16.50    0.90
   5  -2   9   17.64    1.08
   5  -2   9   15.49    0.97
   5   2   9   17.00    0.83
  -5  -2  -9   14.94    0.89
   5   2   9   17.47    1.11
  -5   2  -9   16.99    0.87
  -5   2  -9   18.76    1.07
   5  -2   9   16.75    0.96
  -5  -2  -9   17.91    1.11
  -5  -2  -9   16.36    0.89
  -5   2  -9   15.74    0.91
   5   2   9   17.09    1.01
  -5   2  -9   16.70    0.82
  -4   0  11    0.11    0.40
  -4   0  11   -0.03    0.15
   4   0 -11   -0.30    0.47
  -4   0  11    0.31    0.32
   4   0 -11   -0.10    0.31
   4   0 -11    0.30    0.42
  -4   0  11   -0.04    0.42
   0  -3 -10   -0.32    0.51
   0  -3  10    0.05    0.37
   0  -3  10    0.05    0.12
   0   3 -10   -0.20    0.32
   0   3  10   -0.21    0.48
   0  -3 -10   -0.03    0.38
   0   3  10    0.16    0.27
   0  -3 -10   -0.27    0.20
   0  -3 -10   -0.01    0.16
   0  -3  10   -0.04    0.19
   0  -3  10   -0.43    0.30
   0   3 -10    0.05    0.15
   0   3  10    0.82    0.43
   7   3   5   -0.02    0.46
   7   3   5    0.19    0.31
  -7   3  -5   -0.26    0.41
  -7  -3  -5    0.01    0.12
  -7  -3  -5   -0.29    0.37
  -7  -3  -5    0.29    0.40
   7  -3   5    0.28    0.47
  -7   3  -5   -0.15    0.20
   7  -3   5    0.75    0.32
  -7  -3  -5    0.47    0.42
  -7   3  -5   -0.06    0.36
   7  -3   5   -0.07    0.41
  -7  -3  -5   -0.32    0.29
   8   3  -3    3.28    0.41
  -8  -3   3    3.03    0.24
  -8   3   3    1.56    0.40
   8  -3  -3    1.28    0.31
   8   3  -3    2.12    0.42
   8  -3  -3    1.53    0.46
   8  -3  -3    2.14    0.39
   8   3  -3    2.04    0.34
   8  -3  -3    2.77    0.48
  -8  -3   3    3.53    0.47
  -8  -3   3    2.56    0.46
  -8   3   3    3.56    0.44
   8  -2   5    1.88    0.54
  -8  -2  -5    1.57    0.40
   8  -2   5    2.34    0.42
   8  -2   5    2.06    0.40
  -8   2  -5    1.18    0.41
  -8  -2  -5    2.22    0.49
  -8  -2  -5    1.68    0.15
   8   2   5    2.23    0.40
  -8  -2  -5    1.56    0.37
   8   2   5    2.20    0.50
  -8   2  -5    2.11    0.52
   1  -3 -10    1.07    0.41
   1  -3 -10    0.87    0.55
  -1  -3  10    0.61    0.41
   1  -3 -10    0.56    0.20
  -1   3  10    0.45    0.34
  -1   3  10    0.02    0.41
  -1  -3  10    0.45    0.10
   1  -3 -10    0.70    0.40
  -1   3  10    0.03    0.51
   1   3 -10    0.43    0.17
   1   3 -10    0.45    0.31
  -1  -3  10    0.51    0.23
  -1  -3  10    0.24    0.32
  -5  -4   6    5.46    0.49
  -5   4   6    4.78    0.52
  -5  -4   6    5.33    0.46
  -5   4   6    5.60    0.46
   5  -4  -6    6.43    0.63
  -5  -4   6    5.73    0.33
   5  -4  -6    6.18    0.64
  -5  -4   6    5.51    0.29
  -5   4   6    5.96    0.42
   5  -4  -6    6.03    0.55
   5   4  -6    6.26    0.44
  -4  -3   9    0.25    0.33
  -4  -3   9    0.60    0.31
   4   3  -9    0.32    0.18
  -4   3   9    0.76    0.21
   4  -3  -9    0.08    0.26
   4   3  -9    0.65    0.19
   4   3  -9    0.79    0.38
   4  -3  -9    0.80    0.39
  -4   3   9    1.36    0.46
   4   3  -9    0.43    0.30
  -4  -3   9    0.01    0.39
  -4   3   9    0.53    0.38
   4  -3  -9    0.61    0.54
   4  -3  -9    1.18    0.47
   4  -4  -7    3.04    0.54
  -4  -4   7    3.16    0.44
  -4  -4   7    3.03    0.35
  -4  -4   7    2.89    0.16
  -4   4   7    3.13    0.40
   4  -4  -7    2.61    0.50
  -4   4   7    3.32    0.25
  -4  -4   7    3.46    0.25
   4  -4  -7    3.19    0.44
  -7   0  -8    0.07    0.11
  -7   0  -8    0.77    0.48
  -7   0  -8   -0.06    0.35
  -7   0  -8    0.09    0.28
   7   0   8   -0.53    0.39
   7   0   8   -0.12    0.36
  -7   0  -8    0.04    0.30
   2  -5  -5    2.09    0.41
   2  -5  -5    2.60    0.31
   2  -5  -5    1.61    0.38
  -2  -5   5    2.53    0.18
  -2  -5   5    2.52    0.36
  -2  -5   5    2.16    0.26
   2  -5  -5    2.51    0.56
  -2   5   5    2.54    0.46
  -2  -5   5    2.52    0.21
  -2   5   5    2.04    0.33
  -1   2 -11   20.82    1.05
   1  -2  11   18.97    0.91
  -1  -2 -11   18.17    1.11
   1   2  11   20.87    1.16
  -1  -2 -11   20.86    1.12
   1  -2  11   20.90    1.11
   1   2  11   21.25    1.28
   1   2  11   20.57    1.06
  -1   2 -11   20.41    1.17
   1  -2  11   20.23    1.20
  -1  -2 -11   18.41    1.08
  -1  -2 -11   20.04    1.06
  -8   1   7    0.83    0.53
   8   1  -7    0.46    0.37
   8  -1  -7    0.36    0.26
  -8  -1   7    0.83    0.52
   8   1  -7    0.68    0.22
  -8  -1   7    0.51    0.45
   8  -1  -7   -0.24    0.43
   8   1  -7    0.82    0.37
  -8   1   7    0.41    0.35
   8   1  -7    0.72    0.43
   8  -1  -7    0.49    0.41
  -8   1   7    0.60    0.34
  -5   0 -10    0.42    0.30
   5   0  10   -0.14    0.27
  -5   0 -10    0.26    0.45
  -5   0 -10    0.05    0.20
   5   0  10    0.40    0.44
  -5   0 -10   -0.02    0.26
   5   0  10   -0.39    0.34
   3  -5   4    3.69    0.37
  -3  -5  -4    3.56    0.36
   3   5   4    3.34    0.50
   3  -5   4    3.70    0.28
   3  -5   4    3.58    0.40
  -3  -5  -4    3.70    0.31
   3   5   4    3.77    0.24
  -3   5  -4    3.65    0.26
  -3  -5  -4    3.73    0.47
   3  -5   4    3.32    0.37
  -3  -5  -4    3.16    0.52
  -3   5  -4    3.24    0.27
   3  -5   4    3.88    0.41
   3  -1  11    5.13    0.35
   3  -1  11    5.16    0.59
  -3   1 -11    5.69    0.59
   3   1  11    5.65    0.40
  -3   1 -11    4.83    0.38
   3   1  11    5.78    0.35
  -3  -1 -11    5.79    0.52
  -3   1 -11    5.87    0.54
   3   1  11    5.69    0.56
   3  -1  11    6.17    0.51
  -3  -1 -11    6.80    0.55
  -3   1 -11    6.73    0.46
   3   1  11    5.66    0.66
  -3   1 -11    5.02    0.51
  -3  -1 -11    5.52    0.45
   9  -2   2    7.14    0.51
   9  -2   2    7.57    0.66
  -9  -2  -2    9.70    0.77
   9  -2   2    8.35    0.75
   9  -2   2    7.34    0.43
  -9  -2  -2    8.99    0.59
   9   2   2    7.29    0.65
  -9   2  -2    9.61    0.58
   9   2   2    8.05    0.61
   9   2   2    8.76    0.67
  -9  -2  -2    7.21    0.58
  -9   2  -2    7.10    0.67
  -9   2  -2    7.45    0.55
   6  -4   4    1.09    0.41
  -6  -4  -4    2.60    0.46
   6   4   4    1.81    0.49
  -6   4  -4    2.26    0.37
   6  -4   4    1.98    0.48
  -6  -4  -4    2.37    0.35
   6   4   4    2.96    0.32
   6  -4   4    2.19    0.30
   6  -4   4    0.57    0.27
  -6   4  -4    1.20    0.36
  -2  -2  11    5.57    0.40
   2   2 -11    5.68    0.51
  -2   2  11    5.75    0.57
  -2   2  11    5.75    0.53
   2  -2 -11    5.61    0.53
  -2  -2  11    5.70    0.58
   2  -2 -11    5.40    0.34
   2   2 -11    5.59    0.31
   2   2 -11    6.07    0.60
  -2  -2  11    4.84    0.49
  -2   2  11    7.86    0.72
   9  -1   4    1.07    0.50
  -9   1  -4    0.73    0.26
   9   1   4    0.99    0.35
   9  -1   4    0.76    0.38
  -9  -1  -4    0.77    0.38
  -9   1  -4    0.70    0.43
   9   1   4    1.23    0.44
  -9  -1  -4    1.18    0.46
   9  -1   4    0.85    0.33
  -9  -1  -4    1.43    0.28
   9   1   4    0.45    0.37
   9  -2  -3    7.60    0.66
   9  -2  -3    8.82    0.63
  -9  -2   3    9.77    0.73
  -9   2   3    9.42    0.64
   9   2  -3    8.74    0.63
   9   2  -3   10.11    0.66
   9   2  -3   10.21    0.72
  -9  -2   3    9.81    0.78
  -9   2   3   10.18    0.76
  -9  -2   3    9.20    0.53
   9  -2  -3   10.12    0.61
   1   3  10    2.77    0.50
  -1  -3 -10    3.97    0.56
  -1   3 -10    5.31    0.44
   1  -3  10    3.85    0.54
  -1  -3 -10    1.77    0.36
   1  -3  10    2.48    0.58
   1   3  10    2.24    0.46
   1  -3  10    2.21    0.34
   1  -3  10    4.56    0.59
  -1   3 -10    2.32    0.21
  -1  -3 -10    2.20    0.40
   1   3  10    3.35    0.31
   1  -3  10    2.52    0.28
  -1  -3 -10    4.25    0.36
   8   2  -6    4.42    0.26
  -8   2   6    4.55    0.49
   8  -2  -6    4.36    0.59
   8  -2  -6    4.99    0.55
  -8   2   6    4.49    0.48
   8   2  -6    4.25    0.38
  -8  -2   6    4.85    0.55
   8  -2  -6    4.19    0.33
   8   2  -6    4.56    0.29
   8   2  -6    4.08    0.43
  -8  -2   6    4.63    0.54
  -8   2   6    4.11    0.46
   8   2  -6    4.03    0.44
   4  -5  -3    2.58    0.46
   4  -5  -3    3.02    0.50
  -4  -5   3    3.49    0.50
  -4  -5   3    3.51    0.22
  -4  -5   3    3.73    0.44
  -4  -5   3    3.39    0.37
   4   5  -3    3.58    0.43
  -4   5   3    3.61    0.25
   4  -5  -3    3.44    0.45
  -4   5   3    3.57    0.44
  -4   5   3    3.39    0.39
   4  -5  -3    3.18    0.37
  -2  -4  -8    0.53    0.54
  -2   4  -8   -0.10    0.16
   2   4   8   -0.13    0.18
  -2  -4  -8   -0.39    0.31
   2  -4   8    0.23    0.34
   2  -4   8    0.25    0.28
   2  -4   8   -0.04    0.20
   2  -4   8    0.21    0.37
   2   4   8   -0.10    0.48
  -2   4  -8   -0.03    0.16
   2   4   8   -0.16    0.36
   7  -4   0    1.64    0.48
  -7  -4   0    1.33    0.35
  -7   4   0    0.69    0.39
  -7   4   0    0.65    0.44
   7  -4   0    0.54    0.44
   7  -4   0    0.63    0.32
   7   4   0    1.01    0.39
   7   4   0    0.75    0.30
  -7  -4   0    0.94    0.32
   7  -4   0    0.25    0.30
  -7  -4   0    0.79    0.14
  -7  -4   0    0.74    0.34
   7  -4   0    0.80    0.23
  -7  -4   1    1.46    0.38
  -7  -4   1    1.21    0.41
   7  -4  -1    0.92    0.37
   7  -4  -1    1.13    0.31
  -7   4   1    1.36    0.38
   7  -4  -1    1.41    0.30
   7   4  -1    1.50    0.31
   7  -4  -1    1.72    0.25
  -7  -4   1    1.41    0.29
   7   4  -1    1.21    0.42
  -7  -4   1    1.57    0.15
  -7   4   1    1.73    0.46
   7  -4  -1    1.02    0.50
   2  -5   5    0.84    0.26
   2  -5   5    0.44    0.23
   2  -5   5    0.78    0.29
  -2   5  -5    0.42    0.17
   2  -5   5    0.44    0.34
   2   5   5    0.55    0.19
  -2  -5  -5    0.49    0.30
  -2  -5  -5    0.92    0.51
  -2  -5  -5   -0.03    0.49
   2   5   5    0.73    0.46
  -2   5  -5    0.61    0.16
  -2  -5  -5    0.77    0.26
  -9  -1   5    1.25    0.27
   9  -1  -5    2.28    0.52
  -9  -1   5    2.03    0.49
   9   1  -5    1.63    0.44
   9  -1  -5    2.10    0.25
  -9   1   5    0.88    0.33
  -9   1   5    2.13    0.48
   9  -1  -5    1.00    0.24
   9   1  -5    1.42    0.23
   9   1  -5    0.75    0.17
   9  -1  -5    2.00    0.34
   9   1  -5    1.40    0.39
   9   1  -5    2.04    0.34
  -9   1   5    1.33    0.54
  -9  -1   5    0.54    0.53
   9  -1  -5    1.21    0.51
   7  -2   7    0.15    0.31
  -7   2  -7    0.12    0.34
  -7  -2  -7    1.11    0.41
  -7  -2  -7    0.52    0.14
  -7  -2  -7    0.49    0.33
  -7  -2  -7    0.46    0.35
  -7   2  -7    0.68    0.44
   7  -2   7    0.72    0.46
   7   2   7    0.46    0.32
   7  -2   7   -0.34    0.39
  -6  -1  -9   10.20    0.57
   6   1   9    9.38    0.75
   6  -1   9   11.17    0.82
  -6  -1  -9   10.90    0.79
   6   1   9    9.12    0.62
   6  -1   9    9.85    0.69
  -6  -1  -9   10.39    0.69
  -6  -1  -9    9.18    0.73
  -6   1  -9    9.98    0.79
   6  -1   9   10.16    0.67
  -6  -1  -9   10.24    0.69
  -6   1  -9   10.55    0.65
  -6   1  -9    9.71    0.51
   7   3  -6    1.01    0.31
  -7   3   6    1.26    0.35
  -7  -3   6    0.62    0.20
   7  -3  -6    0.44    0.29
  -7   3   6    1.26    0.36
   7   3  -6    1.39    0.34
   7  -3  -6    1.13    0.48
   7   3  -6    1.08    0.24
   7  -3  -6    1.13    0.37
  -7   3   6    0.78    0.49
  -7   3   6   -0.08    0.38
   7  -3  -6    1.15    0.53
  -7  -3   6    1.15    0.51
   7   3  -6    1.28    0.32
  -7  -3   6    1.00    0.35
   2   3 -10    1.70    0.33
  -2   3  10    1.79    0.47
  -2   3  10    1.79    0.40
   2  -3 -10    2.06    0.42
   2  -3 -10    1.87    0.48
  -2   3  10    1.72    0.47
   2   3 -10    1.25    0.38
  -2  -3  10    1.67    0.28
   2  -3 -10    1.47    0.39
   2   3 -10    1.72    0.20
  -2  -3  10    0.91    0.40
   2  -3 -10    1.36    0.24
  -2  -3  10    1.47    0.35
   0   0 -12   32.08    1.62
   0   0 -12   32.15    1.53
   0   0  12   33.95    1.79
   0   0  12   31.83    1.60
   0   0 -12   33.36    1.79
   0   0 -12   33.42    1.64
   0   0 -12   32.57    1.71
   0   0  12   30.83    1.58
  -1   0  12    0.27    0.33
   1   0 -12   -0.19    0.21
  -1   0  12   -0.08    0.34
  -1   0  12    0.18    0.45
   1   0 -12   -0.25    0.44
   1   0 -12    0.27    0.41
   1   0 -12   -0.01    0.18
   1   0 -12   -0.03    0.26
  -4   1  11   21.20    1.22
   4   1 -11   20.10    1.21
   4   1 -11   19.70    1.15
   4   1 -11   20.59    1.18
   4  -1 -11   21.01    1.26
  -4  -1  11   18.93    0.96
  -4   1  11   21.08    1.05
  -4  -1  11   17.85    1.06
  -4   1  11   19.46    1.14
   4  -1 -11   20.48    1.21
  -4   1  11   19.13    1.07
  -4  -1  11   20.03    1.19
   4  -1 -11   18.40    1.05
  -4  -1  11   19.02    1.02
   4  -1 -11   18.79    1.00
  -5  -3  -8    5.41    0.61
   5  -3   8    5.91    0.54
  -5   3  -8    5.23    0.35
  -5  -3  -8    7.19    0.63
   5  -3   8    4.88    0.48
  -5   3  -8    5.18    0.45
   5   3   8    5.42    0.34
   5  -3   8    5.03    0.56
   5   3   8    6.13    0.35
  -5  -3  -8    5.76    0.41
   7  -4   1    1.25    0.33
   7  -4   1    1.18    0.25
  -7   4  -1    0.88    0.42
   7  -4   1    0.76    0.44
  -7  -4  -1    1.22    0.35
   7  -4   1    1.30    0.46
  -7  -4  -1    1.19    0.39
   7   4   1    1.31    0.46
  -7  -4  -1    0.73    0.34
  -7   4  -1    0.77    0.32
   7   4   1    1.30    0.31
  -7  -4  -1    1.47    0.16
   4  -5   3   -0.02    0.36
  -4  -5  -3   -0.08    0.30
   4  -5   3    0.11    0.34
  -4   5  -3   -0.03    0.22
   4  -5   3    0.07    0.32
  -4  -5  -3   -0.11    0.37
  -4  -5  -3    0.26    0.50
   4   5   3    0.10    0.45
   4  -5   3    0.07    0.21
  -4  -5  -3   -0.13    0.21
   4  -5   3   -0.24    0.27
   4   5   3    0.05    0.14
  -4   5  -3    0.25    0.26
  -8   3  -3   28.30    1.53
  -8  -3  -3   29.15    1.36
   8  -3   3   28.45    1.43
  -8  -3  -3   28.56    1.51
   8  -3   3   29.11    1.41
   8   3   3   29.39    1.49
   8  -3   3   27.32    1.49
   8   3   3   28.24    1.53
  -8  -3  -3   28.23    1.47
   8  -3   3   25.84    1.42
  -8   3  -3   28.49    1.53
  -4  -2 -10    0.33    0.27
   4  -2  10    0.31    0.43
   4   2  10    0.54    0.14
   4   2  10    0.19    0.40
   4  -2  10    0.67    0.29
  -4   2 -10    0.35    0.18
   4  -2  10   -0.08    0.29
   4   2  10    0.48    0.40
  -4   2 -10    0.90    0.41
  -4   2 -10    0.56    0.32
  -4  -2 -10    0.46    0.37
   4   2  10    0.51    0.22
  -4  -2 -10    0.62    0.42
  -4  -2 -10    0.39    0.30
   7   4  -2    8.75    0.69
  -7  -4   2    8.91    0.66
  -7   4   2    8.12    0.70
  -7  -4   2    9.68    0.70
  -7   4   2    8.23    0.64
  -7  -4   2    8.33    0.44
   7  -4  -2    7.36    0.59
   7  -4  -2    7.75    0.67
   7   4  -2    9.34    0.58
  -7  -4   2    9.22    0.55
   7  -4  -2    7.18    0.59
  -7   4   2    8.48    0.64
   7  -4  -2    7.50    0.55
  -7  -1  -8    3.03    0.50
   7  -1   8    3.04    0.50
   7   1   8    2.57    0.54
  -7  -1  -8    2.38    0.17
  -7  -1  -8    3.12    0.45
  -7   1  -8    2.89    0.43
   7   1   8    2.69    0.39
  -7   1  -8    2.41    0.51
  -7   1  -8    3.05    0.33
  -7  -1  -8    2.70    0.42
   7  -1   8    2.88    0.37
  -7  -1  -8    2.24    0.37
   7  -1   8    3.31    0.43
  -6   3  -7    9.02    0.66
  -6  -3  -7    9.66    0.68
  -6   3  -7    7.69    0.64
   6   3   7    8.61    0.57
   6  -3   7    8.86    0.67
  -6   3  -7    7.96    0.51
  -6  -3  -7    8.18    0.70
   6  -3   7    7.37    0.66
   6   3   7    8.49    0.74
  -6  -3  -7    8.24    0.47
   6  -3   7    8.65    0.66
  -6  -3  -7    8.92    0.66
   6  -4  -5    4.45    0.50
  -6   4   5    5.36    0.37
  -6  -4   5    4.38    0.46
   6  -4  -5    4.05    0.43
   6   4  -5    5.90    0.52
  -6  -4   5    5.28    0.50
  -6   4   5    4.97    0.54
   6  -4  -5    4.73    0.49
  -6   4   5    4.75    0.45
   6  -4  -5    5.48    0.44
  -6  -4   5    5.66    0.38
   6   4  -5    5.23    0.49
   6   4  -5    5.47    0.36
  -5   1 -10    1.64    0.26
   5  -1  10    1.95    0.38
   5   1  10    1.90    0.31
   5   1  10    2.31    0.56
  -5  -1 -10    1.48    0.36
   5  -1  10    1.53    0.46
  -5  -1 -10    1.72    0.43
  -5   1 -10    1.93    0.45
   5  -1  10    1.64    0.37
  -5   1 -10    1.86    0.26
  -5  -1 -10    1.33    0.24
   5   1  10    1.46    0.40
  -5   1 -10    1.88    0.41
  -5  -1 -10    2.72    0.43
  -5  -1 -10    1.82    0.33
  -6   2   9    1.98    0.30
   6   2  -9    2.07    0.39
  -6  -2   9    1.65    0.30
   6   2  -9    1.96    0.20
  -6   2   9    1.96    0.41
   6  -2  -9    2.26    0.42
   6  -2  -9    2.52    0.32
   6   2  -9    1.91    0.41
  -6  -2   9    2.29    0.52
  -6   2   9    1.88    0.51
  -6  -2   9    1.91    0.43
   6   2  -9    2.62    0.39
   6  -2  -9    2.42    0.54
  -6  -2   9    2.20    0.32
   3  -4  -8    0.35    0.27
  -3  -4   8    0.67    0.27
  -3  -4   8    0.92    0.13
  -3   4   8    0.79    0.33
   3  -4  -8    0.09    0.36
  -3  -4   8    0.59    0.20
  -3  -4   8    0.39    0.31
   3  -4  -8    0.81    0.47
 -10   0   1   -0.43    0.48
 -10   0   1   -0.23    0.21
 -10   0   1   -0.17    0.20
  10   0  -1   -0.03    0.25
  10   0  -1    0.07    0.39
 -10   0   0    1.35    0.41
  10   0   0    1.46    0.40
  10   0   0    1.50    0.51
  10   0   0    1.25    0.29
 -10   0   0    1.52    0.51
 -10   0   0    1.42    0.23
 -10   0   0    1.49    0.25
   7   0  -9    3.58    0.54
  -7   0   9    4.39    0.40
  -7   0   9    4.09    0.57
   7   0  -9    3.91    0.31
  -7   0   9    3.94    0.38
   7   0  -9    4.09    0.50
   7   0  -9    4.14    0.49
  -7   0   9    4.81    0.43
   8   3  -4    2.56    0.38
  -8   3   4    1.60    0.34
   8  -3  -4    2.30    0.31
  -8   3   4    2.23    0.40
  -8  -3   4    2.17    0.37
  -8  -3   4    2.94    0.50
   8  -3  -4    2.28    0.53
   8  -3  -4    2.21    0.40
   8   3  -4    1.96    0.32
  -4  -4  -7    2.76    0.55
   4   4   7    3.17    0.56
   4  -4   7    3.16    0.38
  -4  -4  -7    3.49    0.51
   4  -4   7    2.98    0.46
  -4   4  -7    3.30    0.36
   4  -4   7    2.68    0.24
   4   4   7    2.76    0.18
  -4   4  -7    3.28    0.25
  -4   4  -7    2.87    0.25
  -4  -4  -7    2.43    0.28
   4  -4   7    1.99    0.36
  -6   0  10    5.61    0.42
   6   0 -10    5.72    0.43
  -6   0  10    5.06    0.39
   6   0 -10    5.18    0.52
  -6   0  10    3.95    0.44
  -6   0  10    4.60    0.57
   6   0 -10    5.20    0.54
   6   0 -10    5.44    0.56
   1   0  12   -0.15    0.21
   1   0  12   -0.35    0.35
  -1   0 -12    0.10    0.27
  -1   0 -12    0.16    0.30
   1   0  12   -0.06    0.42
  -1   0 -12   -0.19    0.45
  -2  -2 -11    1.17    0.38
   2  -2  11    0.80    0.32
  -2   2 -11    0.67    0.21
   2   2  11    0.87    0.46
   2  -2  11    0.54    0.27
  -2  -2 -11    0.70    0.31
   2  -2  11    0.25    0.46
  -2  -2 -11    0.62    0.35
  -2  -2 -11    1.52    0.54
  -2   2 -11    0.31    0.36
   2   2  11    1.12    0.54
   2   2  11    0.84    0.19
   5  -4   6    4.77    0.51
  -5   4  -6    5.14    0.44
   5   4   6    5.34    0.33
  -5   4  -6    4.69    0.28
  -5  -4  -6    5.27    0.47
   5   4   6    3.44    0.46
   5   4   6    5.19    0.24
   5  -4   6    5.12    0.47
  -5  -4  -6    5.74    0.64
   5  -4   6    5.51    0.41
  -5   4  -6    5.27    0.38
  -5  -4  -6    4.12    0.26
   5  -4   6    4.92    0.26
   5  -4   6    4.56    0.39
  -5  -4  -6    5.15    0.46
  -2   0  12    2.72    0.45
   2   0 -12    2.88    0.33
   2   0 -12    2.08    0.28
   2   0 -12    2.45    0.45
  -2   0  12    2.07    0.36
  -2   0  12    2.70    0.50
   2   0 -12    3.32    0.57
   0   5   6    2.84    0.39
   0  -5  -6    2.84    0.52
   0  -5   6    4.03    0.31
   0  -5  -6    3.31    0.59
   0   5   6    2.64    0.42
   0  -5   6    3.87    0.34
   0   5  -6    2.92    0.18
   0   5   6    4.42    0.32
   0  -5   6    2.94    0.27
   0  -5  -6    4.27    0.45
   0  -5   6    3.33    0.36
   0  -5  -6    4.61    0.28
   7  -2  -8    1.07    0.42
  -7   2   8    0.61    0.37
   7  -2  -8    0.90    0.30
   7   2  -8    1.11    0.39
  -7   2   8    0.53    0.48
  -7  -2   8    1.14    0.40
  -7   2   8    1.88    0.39
  -7  -2   8    0.99    0.25
   7   2  -8    1.12    0.20
  -7  -2   8   -0.32    0.47
   7   2  -8    1.64    0.39
   7   2  -8    0.82    0.38
  -7   2   8    1.09    0.33
  -9   0  -5    1.06    0.40
   9   0   5    1.29    0.43
   9   0   5    1.12    0.42
   9   0   5    0.94    0.34
  -9   0  -5    1.26    0.28
  -2  -3 -10   56.07    2.68
  -2   3 -10   52.22    2.50
  -2   3 -10   53.06    2.44
   2  -3  10   56.85    2.79
  -2  -3 -10   49.33    2.47
   2   3  10   56.26    2.70
   2   3  10   55.18    2.55
  -2  -3 -10   56.96    2.69
   2  -3  10   56.26    2.64
   9  -2   3    1.58    0.46
   9  -2   3    2.61    0.37
  -9   2  -3    2.79    0.52
  -9  -2  -3    2.36    0.51
  -9  -2  -3    2.47    0.36
   9   2   3    2.51    0.46
   9  -2   3    2.75    0.46
  -9  -2  -3    2.85    0.43
   9   2   3    2.46    0.40
  -9   2  -3    2.84    0.24
   9   2   3    2.31    0.37
   5  -5   0   20.50    1.13
  -5  -5   0   22.81    1.21
  -5   5   0   21.57    1.18
  -5  -5   0   20.45    1.17
   5   5   0   22.31    1.29
   5  -5   0   21.04    1.17
  -5  -5   0   21.69    1.05
   5  -5   0   19.01    1.06
  -5  -5   0   23.26    1.27
   5  -5   0   20.77    1.16
  -5   5   0   21.08    1.09
   4  -3   9    0.22    0.43
  -4  -3  -9    0.33    0.36
  -4   3  -9    0.42    0.27
   4  -3   9    0.27    0.39
  -4  -3  -9   -0.08    0.33
   4   3   9    0.24    0.13
  -4  -3  -9   -0.74    0.52
   4   3   9    0.41    0.39
  -4   3  -9    0.24    0.33
  -4  -3  -9    0.17    0.26
   4  -3   9    0.18    0.22
   3  -5  -5   16.12    0.91
   3  -5  -5   17.67    1.04
  -3  -5   5   17.86    1.03
   3  -5  -5   16.54    1.00
  -3  -5   5   14.79    0.83
   3  -5  -5   16.98    1.05
  -3  -5   5   17.65    0.88
  -3   5   5   17.03    0.97
  -3   5   5   17.46    1.00
  -8   0  -7    0.17    0.30
  -8   0  -7    0.09    0.33
   8   0   7    0.14    0.37
   8   0   7   -0.14    0.34
  -8   0  -7   -0.32    0.46
   8   0   7   -0.13    0.27
  -8   0  -7    0.30    0.33
 -10   0   2   32.48    1.58
  10   0  -2   30.02    1.49
 -10   0   2   31.64    1.70
  10   0  -2   34.32    1.62
  10   0  -2   32.14    1.67
  10   0   1   -0.74    0.48
  10   0   1   -0.53    0.33
  10   0   1    0.04    0.27
 -10   0  -1   -0.05    0.21
 -10   0  -1    0.10    0.18
 -10   0  -1   -0.64    0.39
 -10   0  -1   -0.27    0.48
   1  -5  -6    1.04    0.36
  -1   5   6    1.61    0.44
  -1  -5   6    1.42    0.31
  -1  -5   6    1.47    0.35
  -1  -5   6    1.13    0.19
  -1   5   6    1.14    0.28
  -1  -5   6    0.85    0.19
   1  -5  -6    1.53    0.56
   1  -5  -6    1.48    0.49
  -1  -5   6    1.15    0.32
  -1  -5   6    1.17    0.16
   1  -5  -6    1.64    0.23
  -1  -5   6    1.69    0.21
  -7   4  -2    0.21    0.38
   7  -4   2   -0.02    0.27
   7  -4   2   -0.14    0.43
   7  -4   2    0.26    0.23
  -7  -4  -2    0.16    0.32
   7  -4   2    0.51    0.47
  -7  -4  -2    0.53    0.37
  -7  -4  -2    0.26    0.41
  -7   4  -2    0.54    0.39
   7   4   2    0.38    0.45
  -7  -4  -2    0.30    0.14
   0  -1 -12    1.80    0.18
   0   1  12    1.27    0.35
   0  -1  12    1.99    0.38
   0  -1 -12    0.90    0.33
   0   1 -12    1.82    0.26
   0   1  12    1.85    0.47
   0  -1 -12    1.76    0.54
   0   1 -12    2.01    0.50
   0  -1 -12    2.36    0.30
   0   1 -12    1.98    0.20
   0   1 -12    2.07    0.40
   0  -1  12    1.63    0.33
   0  -1  12    1.05    0.43
   0  -1 -12    1.82    0.40
   0   1  12    1.99    0.34
   5  -5  -1    3.31    0.41
  -5  -5   1    4.24    0.42
  -5  -5   1    3.00    0.20
   5  -5  -1    2.79    0.36
  -5   5   1    1.88    0.37
  -5  -5   1    3.19    0.42
  -5   5   1    2.64    0.41
   5   5  -1    3.82    0.46
   5  -5  -1    2.34    0.40
  -5  -5   1    3.65    0.40
   5  -5  -1    2.12    0.41
  -9   2   4    7.81    0.72
   9  -2  -4    9.37    0.77
  -9  -2   4    9.61    0.75
  -9  -2   4    8.75    0.54
   9   2  -4    9.14    0.66
  -9   2   4    8.89    0.70
  -9  -2   4    9.92    0.74
   9   2  -4   10.74    0.74
  -9   2   4    8.74    0.62
   9  -2  -4    8.75    0.55
   9   2  -4    7.48    0.51
  -3  -2  11    6.87    0.64
  -3  -2  11    6.99    0.63
  -3   2  11    7.44    0.62
  -3   2  11    6.98    0.61
   3  -2 -11    6.36    0.51
   3   2 -11    7.25    0.68
  -3  -2  11    6.50    0.50
  -3   2  11    7.23    0.67
   3   2 -11    7.05    0.44
   3   2 -11    6.61    0.53
   3  -2 -11    5.69    0.47
   3  -2 -11    5.80    0.55
  -1  -1  12    0.25    0.31
  -1  -1  12    0.26    0.35
   1   1 -12    0.77    0.38
   1  -1 -12    0.18    0.52
   1   1 -12    0.08    0.46
   1   1 -12    0.49    0.26
   1  -1 -12    0.25    0.20
   1  -1 -12    0.28    0.17
   1   1 -12    0.43    0.23
   1  -1 -12    0.86    0.43
   1  -1 -12    0.46    0.32
  -1   1  12    0.71    0.47
  -1  -1  12    0.66    0.45
  -1   1  12    0.57    0.33
  -1   1  12    0.35    0.32
  -4   0 -11   -0.11    0.23
   4   0  11    0.56    0.52
  -4   0 -11   -0.12    0.27
   4   0  11   -0.36    0.35
  -4   0 -11    0.24    0.31
   4   0  11   -0.07    0.22
  -4   0 -11   -0.22    0.38
   9   0  -6   -0.22    0.18
  -9   0   6   -0.10    0.23
   9   0  -6   -0.21    0.44
  -9   0   6   -0.04    0.54
   9   0  -6    0.21    0.42
   9   0  -6    0.25    0.18
   9   0  -6    0.15    0.29
  -9   0   6   -0.25    0.43
  -4  -5   4    1.00    0.38
  -4  -5   4    0.67    0.30
  -4   5   4    0.56    0.35
   4  -5  -4    0.54    0.45
  -4   5   4    0.86    0.17
  -4   5   4    1.46    0.37
   4  -5  -4    0.73    0.36
   4  -5  -4    0.70    0.33
   4  -5  -4    1.27    0.45
  -4  -5   4    1.16    0.15
   5  -2 -10   -0.19    0.32
   5  -2 -10   -0.06    0.46
  -5  -2  10    0.62    0.34
  -5  -2  10   -0.03    0.43
  -5   2  10    0.45    0.43
   5   2 -10    0.48    0.39
   5   2 -10   -0.02    0.32
  -5  -2  10   -0.28    0.22
  -5  -2  10    0.30    0.29
   5  -2 -10    0.08    0.28
  -5   2  10   -0.17    0.32
  -5   2  10   -0.09    0.18
   5   2 -10    0.17    0.31
  -5   2  10    0.20    0.43
  -5  -5  -1   13.83    0.86
   5  -5   1   12.78    0.84
  -5  -5  -1   13.94    0.72
   5  -5   1   13.28    0.72
   5  -5   1   14.80    0.89
   5   5   1   14.05    0.94
  -5  -5  -1   12.33    0.82
  -5  -5  -1   13.12    0.81
   5  -5   1   12.93    0.82
   5  -5   1   13.22    0.82
  -5   5  -1   13.80    0.84
  -5   5  -1   14.95    0.83
  -1   5  -6    0.81    0.13
   1   5   6    0.61    0.22
   1  -5   6    0.97    0.28
   1   5   6    1.30    0.47
  -1  -5  -6    1.41    0.45
  -1  -5  -6    1.34    0.52
  -1  -5  -6    1.08    0.26
   1  -5   6    0.59    0.28
   1  -5   6    0.57    0.28
  -7  -4   3    6.32    0.58
   7  -4  -3    5.79    0.54
   7   4  -3    5.29    0.48
  -7  -4   3    5.80    0.38
  -7  -4   3    6.08    0.39
  -7   4   3    5.64    0.51
  -7  -4   3    5.66    0.32
   7   4  -3    5.71    0.46
   7  -4  -3    5.26    0.42
  -7   4   3    5.54    0.48
  -7  -4   3    4.40    0.46
   7  -4  -3    5.38    0.58
   7  -4  -3    5.02    0.51
   3   3 -10    7.45    0.44
   3  -3 -10    7.80    0.67
  -3   3  10    7.32    0.60
  -3  -3  10    7.25    0.48
   3  -3 -10    6.80    0.51
  -3   3  10    7.84    0.64
   3   3 -10    5.31    0.40
  -3   3  10    4.90    0.48
   3   3 -10    7.16    0.63
  -3  -3  10    7.19    0.60
   3  -3 -10    6.52    0.71
   3  -3 -10    7.77    0.58
  -3  -3  10    5.97    0.59
 -10  -1   1    2.18    0.23
  10  -1  -1    1.39    0.38
 -10   1   1    2.28    0.27
 -10  -1   1    0.93    0.41
  10  -1  -1    1.99    0.55
  10   1  -1    1.99    0.40
 -10   1   1    1.49    0.51
  10   1  -1    2.12    0.34
 -10   1   1    2.42    0.47
  10  -1  -1    2.02    0.21
 -10  -1   1    1.96    0.23
  10  -1   0    2.14    0.20
 -10  -1   0    1.61    0.24
 -10   1   0    1.84    0.42
 -10   1   0    2.08    0.25
 -10   1   0    1.95    0.53
  10   1   0    1.43    0.31
  10  -1   0    1.88    0.39
  10   1   0    1.82    0.42
 -10  -1   0    2.02    0.23
 -10  -1   0    1.69    0.52
  10  -1   0    1.93    0.44
  -7   1   9    4.38    0.39
  -7  -1   9    5.90    0.54
  -7   1   9    5.31    0.43
   7   1  -9    5.14    0.30
  -7  -1   9    5.62    0.46
   7   1  -9    6.19    0.58
   7  -1  -9    6.50    0.66
   7  -1  -9    5.87    0.58
   7   1  -9    6.26    0.55
   7  -1  -9    6.34    0.58
  -7   1   9    5.01    0.56
   7  -1  -9    4.79    0.31
  -7  -1   9    5.08    0.60
   7   1  -9    5.71    0.58
   3   4   8    1.46    0.41
  -3   4  -8    1.20    0.26
   3   4   8    1.26    0.17
  -3  -4  -8    1.20    0.53
  -3   4  -8    1.63    0.22
   3  -4   8    1.26    0.37
   3   4   8   -0.02    0.49
   3  -4   8    1.28    0.43
  -3  -4  -8    0.54    0.25
   3  -4   8    1.08    0.34
   3  -4   8    0.96    0.20
  -3   4  -8    1.10    0.14
  -5   5   2    4.10    0.41
   5  -5  -2    4.14    0.48
  -5  -5   2    3.86    0.45
  -5  -5   2    3.47    0.36
  -5  -5   2    3.28    0.40
   5  -5  -2    4.24    0.43
  -5   5   2    3.97    0.43
   5   5  -2    4.01    0.47
   5  -5  -2    3.44    0.46
   5  -5  -2    3.20    0.44
  -5  -5   2    3.88    0.21
  -6   1  10    4.38    0.40
  -6   1  10    4.62    0.48
   6   1 -10    4.79    0.48
  -6   1  10    4.30    0.54
  -6  -1  10    4.17    0.37
   6  -1 -10    4.40    0.32
   6   1 -10    4.85    0.32
  -6   1  10    4.83    0.35
  -6  -1  10    4.44    0.38
   6  -1 -10    3.96    0.47
   6  -1 -10    4.63    0.53
   6   1 -10    4.60    0.49
   6   1 -10    4.69    0.55
   6  -1 -10    4.78    0.56
  -6  -1  10    4.57    0.44
  -6  -1  10    4.76    0.55
   1  -1  12    0.74    0.23
   1   1  12    1.02    0.24
   1   1  12    0.71    0.43
   1   1  12    0.29    0.39
  -1  -1 -12    0.85    0.29
   1  -1  12    1.07    0.34
  -1   1 -12    0.85    0.40
  -1  -1 -12    0.73    0.27
   1  -1  12    1.10    0.47
  -1   1 -12    1.24    0.25
  -1   1 -12    1.36    0.36
  -1  -1 -12    1.17    0.39
  -8   0   8   16.80    1.00
   8   0  -8   16.00    1.00
  -8   0   8   17.68    1.12
   8   0  -8   16.32    1.00
   8   0  -8   17.84    1.06
   8   0  -8   15.98    0.84
   3   5   5   12.32    0.64
   3   5   5   11.76    0.84
  -3  -5  -5   10.46    0.78
   3  -5   5   11.53    0.76
   3  -5   5   10.08    0.61
  -3   5  -5   11.45    0.64
   3  -5   5   10.92    0.72
  -3  -5  -5   11.62    0.78
  -3  -5  -5   12.35    0.73
  -3   5  -5   12.12    0.67
  -2   1  12    1.71    0.45
   2   1 -12    1.62    0.26
   2  -1 -12    2.16    0.46
  -2  -1  12    1.44    0.38
   2   1 -12    1.96    0.38
   2  -1 -12    1.75    0.28
   2   1 -12    1.63    0.50
   2   1 -12    2.39    0.39
  -2   1  12    1.23    0.37
   2  -1 -12    1.76    0.34
   2  -1 -12    2.32    0.56
  -2  -1  12    1.53    0.45
  -2  -1  12    1.57    0.31
  -2   1  12    1.83    0.39
  -6   3   8    5.83    0.64
  -6   3   8    4.66    0.41
   6  -3  -8    5.40    0.43
   6   3  -8    4.74    0.38
   6   3  -8    5.19    0.27
   6  -3  -8    5.12    0.54
  -6   3   8    4.99    0.48
  -6  -3   8    5.21    0.52
   6   3  -8    4.36    0.42
  -6   3   8    4.77    0.34
   6   3  -8    5.09    0.48
   6  -3  -8    4.50    0.40
  -6  -3   8    3.78    0.47
  -6  -3   8    5.45    0.34
   7   3   6    7.69    0.71
  -7   3  -6    5.99    0.59
   7  -3   6    6.51    0.58
  -7  -3  -6    6.64    0.56
  -7  -3  -6    5.92    0.35
  -7   3  -6    7.18    0.59
  -7  -3  -6    6.57    0.63
  -7  -3  -6    6.62    0.60
  -7  -3  -6    6.90    0.55
  -7   3  -6    6.85    0.46
   7   3   6    6.17    0.45
   7  -3   6    5.92    0.57
   7  -3   6    5.81    0.50
  -6   4  -5   24.42    1.20
  -6  -4  -5   23.13    1.25
   6  -4   5   20.32    1.16
  -6   4  -5   22.13    1.21
  -6  -4  -5   22.86    1.22
   6  -4   5   23.32    1.31
  -6  -4  -5   22.59    1.29
  -6   4  -5   23.42    1.27
   6   4   5   19.71    1.00
   6  -4   5   22.35    1.16
   6   4   5   23.06    1.32
   6  -4   5   23.38    1.23
  -5   0  11   33.64    1.63
   5   0 -11   32.76    1.71
  -5   0  11   33.95    1.68
   5   0 -11   35.33    1.71
   5   0 -11   33.50    1.78
  -5   0  11   34.08    1.78
   5   0 -11   33.25    1.75
   2  -5  -6   -0.15    0.35
   2  -5  -6   -0.11    0.41
  -2  -5   6   -0.08    0.15
  -2  -5   6    0.13    0.29
  -2  -5   6    0.24    0.14
   2  -5  -6    0.60    0.25
   2  -5  -6    0.49    0.48
  -2  -5   6    0.41    0.22
  -2  -5   6    0.16    0.14
  -2   5   6   -0.01    0.36
  -2   5   6    0.71    0.32
 -10   0   3    0.41    0.44
  10   0  -3    0.48    0.41
  10   0  -3    0.88    0.43
 -10   0   3    0.90    0.47
  10   0  -3    0.14    0.23
  10   0  -3    0.17    0.17
 -10   0   3    0.47    0.26
  10   0   2    0.91    0.38
  10   0   2    0.67    0.39
 -10   0  -2   -0.02    0.44
 -10   0  -2    0.15    0.47
 -10   0  -2    0.33    0.17
 -10   0  -2   -0.02    0.21
  -8   2  -6    3.73    0.47
   8  -2   6    3.80    0.52
  -8  -2  -6    4.74    0.47
   8  -2   6    4.15    0.45
   8  -2   6    3.96    0.41
   8   2   6    3.96    0.54
  -8  -2  -6    4.49    0.20
  -8   2  -6    4.39    0.56
  -8  -2  -6    3.99    0.42
   8   2   6    3.91    0.41
  -8  -2  -6    4.66    0.42
  -2   0 -12   61.60    1.28
   2   0  12   53.61    2.48
  -2   0 -12   59.76    0.95
   2   0  12   57.70    1.02
  -2   0 -12   56.73    2.75
   2   0  12   60.34    1.24
   0  -4   9    3.37    0.39
   0  -4  -9    4.00    0.27
   0  -4   9    2.67    0.25
   0   4   9    3.72    0.30
   0  -4  -9    3.53    0.43
   0  -4  -9    2.65    0.38
   0   4  -9    4.24    0.30
   0   4   9    2.29    0.49
   0  -4   9    3.63    0.50
   0  -4  -9    3.43    0.58
   0  -4   9    4.11    0.41
   0  -4   9    3.32    0.25
  -9   1  -5    1.22    0.45
  -9  -1  -5    1.44    0.30
   9  -1   5    1.08    0.36
   9   1   5    1.17    0.35
   9   1   5    1.45    0.42
  -9   1  -5    0.78    0.42
   9  -1   5    0.65    0.37
   9  -1   5    1.20    0.43
  -9  -1  -5    0.79    0.38
  -9   1  -5    1.33    0.26
   4  -5   4    0.39    0.21
  -4  -5  -4   -0.11    0.31
   4  -5   4   -0.09    0.33
   4  -5   4   -0.19    0.33
  -4  -5  -4    0.33    0.43
   4   5   4    0.33    0.43
   4  -5   4   -0.39    0.33
  -4   5  -4    0.23    0.23
  -4   5  -4    0.19    0.23
  -4  -5  -4    0.40    0.20
  -4  -5  -4   -0.27    0.45
   4   5   4   -0.17    0.14
   8  -1   7    8.43    0.65
   8   1   7    7.89    0.72
  -8  -1  -7    7.42    0.55
   8  -1   7    9.05    0.72
  -8  -1  -7    6.73    0.53
  -8   1  -7    9.25    0.75
  -8   1  -7    6.98    0.50
  -8   1  -7    8.99    0.61
  -8  -1  -7    7.19    0.61
   8  -1   7    7.73    0.60
  -8  -1  -7    8.43    0.62
  -8   1  -7    8.17    0.65
  -8  -1  -7    8.23    0.44
   8   1   7    7.29    0.57
 -10  -1   2   11.28    0.64
  10   1  -2   10.72    0.69
  10  -1  -2   12.19    0.70
 -10  -1   2   12.24    0.84
 -10   1   2   10.78    0.65
 -10  -1   2   10.52    0.75
  10   1  -2   12.82    0.84
  10  -1  -2   12.03    0.82
 -10   1   2   11.57    0.81
  10   1  -2   13.14    0.85
  10  -1  -2   11.83    0.64
  10   1   1    0.57    0.40
  10  -1   1   -0.12    0.40
 -10  -1  -1   -0.16    0.36
 -10   1  -1   -0.08    0.42
  10  -1   1   -0.12    0.42
 -10  -1  -1    0.13    0.21
  10   1   1    0.05    0.40
 -10   1  -1    0.08    0.21
 -10  -1  -1    0.16    0.15
 -10  -1  -1    0.27    0.52
  10   1   1   -0.17    0.25
 -10   1  -1    0.23    0.39
 -10   1  -1   -0.09    0.16
  -1  -4   9   -0.25    0.37
   1  -4  -9    0.93    0.55
  -1  -4   9    0.37    0.14
  -1  -4   9    0.27    0.16
   1  -4  -9    0.14    0.38
  -1   4   9    0.78    0.42
  -1  -4   9    0.39    0.31
  -1  -4   9    0.40    0.30
   1  -4  -9    0.58    0.37
  -1  -4   9    0.30    0.23
   1  -4  -9    0.52    0.21
  -1   4   9    0.42    0.31
  -8   3  -4    1.26    0.39
  -8  -3  -4    1.50    0.40
   8  -3   4    2.20    0.34
  -8  -3  -4    1.22    0.36
   8   3   4    1.96    0.49
  -8  -3  -4    1.52    0.15
   8  -3   4    1.89    0.50
  -8  -3  -4    2.13    0.47
   8   3   4    1.53    0.30
  -8   3  -4    1.47    0.39
   8  -3   4    0.91    0.42
  -5   5  -2    1.42    0.30
  -5  -5  -2    2.14    0.23
   5  -5   2    2.39    0.24
   5   5   2    2.02    0.16
  -5  -5  -2    3.00    0.35
   5  -5   2    1.92    0.33
   5   5   2    1.68    0.45
  -5  -5  -2    1.72    0.42
   5  -5   2    1.44    0.42
   5  -5   2    0.94    0.35
  -5   5  -2    2.25    0.29
   5  -5   2    2.55    0.44
  -5   3   9    8.56    0.68
   5  -3  -9    9.10    0.65
   5  -3  -9   10.28    0.70
  -5   3   9   10.14    0.74
   5  -3  -9    9.16    0.74
   5  -3  -9    8.46    0.72
   5   3  -9    9.36    0.66
  -5  -3   9    9.30    0.73
  -5  -3   9   10.28    0.62
  -5   3   9    8.65    0.50
   5   3  -9    9.50    0.72
   5   3  -9    7.41    0.51
  -5  -3   9    9.03    0.68
  -4  -1 -11    7.56    0.58
  -4   1 -11    6.34    0.58
  -4  -1 -11    7.35    0.59
   4  -1  11    6.87    0.52
   4   1  11    6.96    0.47
  -4   1 -11    7.55    0.63
   4  -1  11    7.18    0.71
   4   1  11    4.82    0.52
  -4   1 -11    7.81    0.51
  -4   1 -11    6.65    0.58
   4  -1  11    7.06    0.55
   4   1  11    5.89    0.56
  -4   1 -11    7.56    0.61
  -4  -1 -11    6.88    0.55
   4   1  11    7.26    0.40
  -5   4   7   15.66    0.97
   5  -4  -7   14.67    0.94
   5  -4  -7   16.00    0.92
   5   4  -7   15.02    0.80
  -5  -4   7   12.67    0.79
  -5   4   7   15.89    0.97
   5  -4  -7   16.92    1.03
  -5  -4   7   14.73    0.91
   5   4  -7   14.79    0.88
  -5  -4   7   15.75    0.83
  -5   4   7   14.42    0.76
  -9   1   6    2.73    0.54
   9   1  -6    1.68    0.34
   9   1  -6    2.28    0.48
   9   1  -6    2.17    0.21
   9   1  -6    1.61    0.22
  -9   1   6    1.86    0.29
   9  -1  -6    1.64    0.48
  -9  -1   6    2.13    0.49
  -9  -1   6    2.09    0.25
  -9  -1   6    1.67    0.55
   9  -1  -6    1.44    0.41
   9  -1  -6    2.42    0.52
  -9   1   6    1.63    0.44
   9  -1  -6    2.57    0.28
  -3   0  12   -0.44    0.35
   3   0 -12   -0.10    0.39
   3   0 -12    0.15    0.27
   3   0 -12    0.17    0.26
   3   0 -12   -0.03    0.49
  -3   0  12   -0.14    0.42
  -3   0  12   -0.01    0.37
   7  -4   3   -0.13    0.41
  -7   4  -3   -0.06    0.37
   7  -4   3    0.53    0.44
   7  -4   3    0.16    0.27
  -7   4  -3   -0.03    0.37
  -7  -4  -3    0.27    0.40
   7  -4   3    0.24    0.21
  -7  -4  -3    0.12    0.36
   7   4   3    0.54    0.45
   2   5   6    2.68    0.49
  -2  -5  -6    3.78    0.50
   2  -5   6    3.32    0.32
  -2   5  -6    3.83    0.23
  -2   5  -6    3.77    0.22
   2  -5   6    3.71    0.38
   2   5   6    4.09    0.25
   2  -5   6    3.35    0.35
  -2  -5  -6    3.91    0.59
  -2  -5  -6    4.08    0.30
   8  -3  -5    0.82    0.28
   8   3  -5    0.54    0.32
  -8  -3   5    0.11    0.47
   8  -3  -5    0.81    0.51
   8   3  -5    0.36    0.25
  -8  -3   5    0.74    0.19
  -8   3   5    1.01    0.36
   8   3  -5    0.65    0.32
   8  -3  -5    1.20    0.34
  -8   3   5    0.97    0.34
  -8   3   5    0.97    0.39
  -8  -3   5    1.04    0.41
   1  -4   9   -0.08    0.41
   1  -4   9    0.31    0.22
  -1   4  -9   -0.21    0.19
  -1  -4  -9   -0.20    0.51
   1  -4   9    0.15    0.20
  -1  -4  -9    0.48    0.38
  -1  -4  -9   -0.15    0.23
   1   4   9    0.26    0.20
   1  -4   9   -0.33    0.31
   1   4   9    0.60    0.46
   1  -4   9    0.08    0.27
   8   2  -7    3.47    0.25
   8  -2  -7    3.02    0.28
   8   2  -7    2.98    0.38
  -8   2   7    2.91    0.46
   8   2  -7    3.33    0.24
   8  -2  -7    3.10    0.46
  -8  -2   7    2.70    0.27
  -8   2   7    3.70    0.40
   8  -2  -7    3.51    0.45
  -8  -2   7    3.38    0.47
   8   2  -7    3.46    0.39
  -8   2   7    3.29    0.38
  -8  -2   7    2.67    0.46
   8   2  -7    3.60    0.47
   3   2  11    3.19    0.48
   3   2  11    4.09    0.48
  -3   2 -11    4.00    0.46
  -3  -2 -11    3.70    0.54
  -3  -2 -11    4.07    0.43
   3  -2  11    3.67    0.37
   3   2  11    3.30    0.21
   3  -2  11    3.63    0.38
  -3  -2 -11    3.67    0.40
  -3   2 -11    3.66    0.39
  -3  -2 -11    4.52    0.41
  -3   2 -11    3.55    0.27
   3  -2  11    3.86    0.55
  -4  -4   8   19.20    1.09
  -4   4   8   19.53    1.09
  -4  -4   8   19.69    0.93
   4  -4  -8   20.35    1.13
   4  -4  -8   17.12    0.95
   4  -4  -8   18.97    1.16
  -4   4   8   19.08    1.10
  -4   4   8   18.41    0.91
  -5  -5   3    3.78    0.30
   5  -5  -3    1.34    0.38
  -5   5   3    3.19    0.31
  -5  -5   3    3.46    0.21
   5  -5  -3    2.08    0.45
   5  -5  -3    3.84    0.51
  -5   5   3    1.24    0.38
  -5  -5   3    3.06    0.39
   5  -5  -3    3.60    0.41
  -5  -5   3    4.48    0.42
   5   5  -3    3.33    0.44
   8  -1  -8   14.41    0.94
   8   1  -8   16.00    0.84
  -8   1   8   15.07    1.01
  -8  -1   8   16.40    1.06
  -8   1   8   13.20    0.84
  -8   1   8   14.01    0.83
   8  -1  -8   16.78    0.90
  -8  -1   8   14.37    0.92
   8   1  -8   14.16    0.91
   8   1  -8   15.14    0.94
   8  -1  -8   13.69    0.87
   8   1  -8   15.04    0.93
  -7   3   7    5.96    0.45
   7   3  -7    5.25    0.54
   7  -3  -7    5.88    0.65
   7   3  -7    4.10    0.35
  -7  -3   7    5.29    0.60
  -7   3   7    4.64    0.55
   7  -3  -7    6.04    0.60
   7   3  -7    5.40    0.52
   7   3  -7    5.68    0.53
   7  -3  -7    5.23    0.49
  -7   3   7    4.87    0.35
  -7  -3   7    5.94    0.43
   7  -3  -7    4.97    0.37
  -7   3   7    5.25    0.45
  -7  -3   7    5.97    0.61
  -9  -2  -4    0.45    0.39
  -9   2  -4    0.92    0.39
   9   2   4    0.87    0.36
   9  -2   4    0.87    0.38
   9  -2   4    1.06    0.32
  -9  -2  -4    0.75    0.33
  -9  -2  -4    0.98    0.35
   9   2   4    1.12    0.36
  -9   2  -4    1.02    0.40
   9  -2   4    0.80    0.49
  -9   2  -4    0.67    0.18
   9   2   4    0.53    0.29
  -9   2  -4    0.95    0.43
  -7   4   4    0.04    0.37
   7  -4  -4    0.05    0.37
   7   4  -4    0.32    0.35
  -7  -4   4    0.07    0.31
   7   4  -4    0.46    0.27
   7  -4  -4    0.23    0.36
   7   4  -4    0.16    0.34
  -7  -4   4    0.02    0.39
   7  -4  -4    0.27    0.28
  -7   4   4    0.29    0.33
   7  -4  -4    0.55    0.33
  -7  -4   4    0.48    0.16
   3   3  10    7.08    0.66
  -3   3 -10    7.53    0.57
   3  -3  10    7.99    0.51
  -3  -3 -10    8.01    0.63
   3   3  10    8.53    0.71
  -3  -3 -10    6.75    0.67
  -3  -3 -10    8.12    0.57
  -3   3 -10    8.39    0.44
   3  -3  10    7.62    0.60
   3  -3  10    7.78    0.64
  -3  -3 -10    7.30    0.55
   3   3  10    7.50    0.46
  -3   3 -10    7.77    0.54
   6  -4  -6    1.84    0.41
  -6   4   6    1.57    0.26
  -6   4   6    1.45    0.31
  -6  -4   6    1.21    0.38
   6   4  -6    2.15    0.29
   6  -4  -6    2.08    0.50
  -6  -4   6    2.37    0.28
  -6   4   6    1.90    0.48
   6  -4  -6    0.71    0.49
  -6  -4   6    2.01    0.45
   6   4  -6    1.79    0.37
  -6   4   6    2.34    0.47
  -2  -4   9    9.73    0.69
  -2  -4   9   10.02    0.61
  -2  -4   9    8.63    0.57
  -2  -4   9   10.94    0.59
   2  -4  -9   11.42    0.70
  -2  -4   9   10.46    0.68
   2  -4  -9   10.37    0.59
   2  -4  -9   11.90    0.89
   2  -4  -9   10.91    0.77
  -2   4   9    9.62    0.63
  -2  -4   9   10.93    0.53
  -2   4   9   11.61    0.75
  -5  -1  11   19.61    0.98
   5  -1 -11   19.68    1.05
  -5  -1  11   18.58    1.08
   5   1 -11   19.51    1.12
   5  -1 -11   20.39    1.17
  -5  -1  11   19.91    1.08
  -5   1  11   19.33    1.08
   5  -1 -11   19.37    1.11
   5   1 -11   19.07    1.06
  -5   1  11   18.26    1.06
   5  -1 -11   19.03    0.96
  -5  -1  11   18.70    0.95
   5   1 -11   18.91    1.05
  -5   1  11   18.88    1.02
  -5   1  11   19.84    0.94
  10   1  -3    1.76    0.36
  10  -1  -3    2.17    0.45
 -10  -1   3    1.81    0.51
  10  -1  -3    2.22    0.29
  10   1  -3    1.75    0.39
 -10   1   3    1.60    0.30
 -10  -1   3    1.52    0.25
  10   1  -3    2.24    0.30
 -10   1   3    2.00    0.49
 -10  -1   3    2.58    0.53
  10  -1  -3    1.28    0.21
 -10   1  -2    3.86    0.36
  10  -1   2    2.84    0.49
 -10  -1  -2    3.21    0.35
 -10   1  -2    2.60    0.53
  10   1   2    3.37    0.45
  10  -1   2    3.77    0.43
  10  -1   2    3.09    0.47
 -10  -1  -2    2.56    0.48
 -10  -1  -2    2.87    0.50
 -10   1  -2    3.45    0.56
 -10   1  -2    3.09    0.32
 -10  -1  -2    3.00    0.28
  10   1   2    4.11    0.50
  10   1   2    3.56    0.53
   2   1  12   15.17    0.75
  -2  -1 -12   14.41    0.88
   2  -1  12   14.68    0.70
   2  -1  12   14.10    0.80
  -2  -1 -12   15.36    0.84
  -2   1 -12   16.75    1.00
   2   1  12   14.90    0.87
  -2   1 -12   14.30    0.87
   2  -1  12   13.09    0.69
   2   1  12   15.69    1.00
   2  -1  12   13.68    0.91
  -2   1 -12   14.73    0.77
  -2  -1 -12   14.93    0.84
  -2   1 -12   15.21    0.98
  -9   2   5    3.31    0.45
  -9  -2   5    3.42    0.52
   9   2  -5    2.36    0.29
   9  -2  -5    2.72    0.32
   9  -2  -5    2.67    0.50
   9  -2  -5    2.62    0.48
  -9   2   5    2.40    0.42
  -9  -2   5    3.25    0.50
  -9   2   5    2.18    0.47
   9   2  -5    4.28    0.51
   9   2  -5    3.31    0.38
  -6  -2  -9    4.52    0.51
  -6  -2  -9    4.77    0.49
   6  -2   9    4.03    0.42
   6  -2   9    4.75    0.59
  -6   2  -9    4.58    0.35
  -6   2  -9    4.24    0.55
   6  -2   9    3.99    0.52
  -6  -2  -9    4.11    0.48
   6   2   9    4.45    0.43
  -6   2  -9    4.44    0.46
   6  -2   9    4.12    0.46
  -6  -2  -9    3.40    0.31
   6   2   9    4.47    0.64
  -6  -2  -9    5.00    0.60
  -4  -2  11    0.74    0.29
   4   2 -11   -0.09    0.35
  -4  -2  11    0.71    0.38
  -4  -2  11   -0.03    0.42
  -4   2  11    0.26    0.38
   4  -2 -11    0.86    0.46
   4   2 -11   -0.20    0.38
   4   2 -11    0.19    0.45
   4  -2 -11   -0.02    0.27
  -4  -2  11    0.26    0.27
  -4   2  11    0.38    0.41
   4  -2 -11    0.28    0.28
  -4   2  11   -0.14    0.33
   4   2 -11    0.50    0.22
  -4   5   5   -0.07    0.30
   4  -5  -5    0.22    0.34
   4  -5  -5   -0.37    0.45
  -4  -5   5   -0.24    0.35
  -4  -5   5    0.07    0.13
   4  -5  -5   -0.22    0.40
  -4   5   5   -0.58    0.43
  -4   5   5    0.06    0.30
   4  -5  -5    0.16    0.39
   3   1 -12    2.41    0.42
   3  -1 -12    2.23    0.34
   3   1 -12    2.38    0.56
   3   1 -12    2.44    0.44
   3  -1 -12    2.06    0.49
  -3  -1  12    1.94    0.42
   3   1 -12    1.82    0.29
  -3  -1  12    1.41    0.30
   3  -1 -12    2.22    0.50
  -3   1  12    2.27    0.43
  -3   1  12    2.23    0.50
  -3  -1  12    1.54    0.44
  -3   1  12    1.96    0.42
  10   0  -4   74.12    3.10
  10   0  -4   75.04    3.30
 -10   0   4   78.76    1.49
 -10   0   4   80.67    1.43
 -10   0   4   77.89    1.01
 -10   0  -3   -0.50    0.40
 -10   0  -3    0.04    0.16
  10   0   3   -0.18    0.32
  10   0   3    0.52    0.46
 -10   0  -3    0.03    0.23
 -10   0  -3   -0.52    0.42
   5   5   3    1.86    0.47
  -5   5  -3    1.60    0.33
   5   5   3    2.07    0.19
   5  -5   3    2.04    0.34
  -5  -5  -3    2.47    0.26
   5  -5   3    1.57    0.32
   5  -5   3    2.23    0.43
  -5  -5  -3    2.19    0.34
  -5   5  -3    2.00    0.35
  -5  -5  -3    1.89    0.49
   5  -5   3    2.38    0.29
   5  -5   3    2.35    0.44
   9  -3   0    1.99    0.52
  -9   3   0    0.64    0.34
   9  -3   0    0.91    0.48
  -9   3   0    0.77    0.45
   9   3   0    1.42    0.38
   9  -3   0    0.92    0.22
  -9   3   0    0.84    0.29
   9   3   0    0.65    0.36
  -9  -3   0    1.61    0.39
  -9  -3   0    0.41    0.48
   9   3   0    1.37    0.36
   9  -3   0    0.92    0.24
  -9  -3   0    1.24    0.25
   6   0  10   30.10    1.44
  -6   0 -10   29.87    1.45
  -6   0 -10   31.68    1.49
   6   0  10   28.87    1.39
   6   0  10   33.03    1.66
  -6   0 -10   29.54    1.32
  -9  -3   1    0.20    0.33
  -9  -3   1    0.31    0.47
   9   3  -1    0.37    0.32
  -9  -3   1    0.22    0.18
   9  -3  -1    0.39    0.38
   9  -3  -1   -0.50    0.45
   9  -3  -1    0.08    0.21
   9   3  -1    0.62    0.29
  -9   3   1    0.08    0.33
   9   3  -1    0.37    0.34
  -9   3   1    0.27    0.43
  -9  -3   1    0.55    0.18
  -9   3   1    0.53    0.34
   9  -3  -1    0.47    0.23
  -3  -5   6    0.63    0.18
   3  -5  -6    0.96    0.25
   3  -5  -6    0.62    0.45
  -3  -5   6    0.55    0.28
   3  -5  -6    0.44    0.44
  -3  -5   6    0.64    0.15
  -3   5   6    0.98    0.41
  -3  -5   6    0.57    0.22
  -3   5   6    0.19    0.33
  -3   5   6    0.27    0.40
   3  -5  -6    0.28    0.33
  -7   0  -9   13.86    0.82
  -7   0  -9   14.32    0.80
  -7   0  -9   12.03    0.59
  -7   0  -9   12.73    0.84
   7   0   9   12.43    0.73
   7   0   9   13.95    0.92
  -7   0  -9   13.31    0.80
   7  -2   8   -0.03    0.39
  -7  -2  -8   -0.14    0.13
   7  -2   8   -0.08    0.27
  -7  -2  -8   -0.07    0.29
  -7  -2  -8    0.32    0.35
   7   2   8   -0.13    0.30
  -7   2  -8    0.19    0.42
  -7  -2  -8   -0.18    0.40
  -7  -2  -8    0.22    0.42
  -7   2  -8   -0.03    0.22
   7  -2   8   -0.45    0.43
  -7   2  -8    0.26    0.36
  -5   2 -10    0.39    0.34
  -5  -2 -10    0.62    0.35
  -5  -2 -10    0.37    0.23
   5   2  10    0.47    0.12
   5   2  10    0.12    0.37
   5  -2  10    0.77    0.39
  -5  -2 -10    0.18    0.52
   5   2  10    0.11    0.23
  -5  -2 -10    0.75    0.39
   5  -2  10    0.12    0.35
  -5   2 -10    0.20    0.38
  -5   2 -10    0.70    0.17
   5  -2  10    0.40    0.31
   5   2  10    0.47    0.34
  -4  -3  10    0.54    0.34
   4  -3 -10    0.50    0.33
   4  -3 -10    1.04    0.45
   4   3 -10    0.43    0.30
   4  -3 -10    0.98    0.38
  -4   3  10    0.93    0.40
  -4   3  10    0.53    0.44
  -4  -3  10    0.60    0.32
   4  -3 -10    0.48    0.47
  -4  -3  10    0.44    0.41
  -4  -3  10    1.42    0.29
   4   3 -10    0.59    0.41
  -4   3  10    0.68    0.41
   4   3 -10    0.62    0.19
   9   0   6    0.04    0.29
   9   0   6    0.67    0.38
   9   0   6   -0.08    0.33
  -9   0  -6   -0.01    0.37
  -9   0  -6    0.10    0.26
  -9   0  -6   -0.08    0.28
  -9   0  -6   -0.04    0.39
   2   4   9    0.74    0.20
   2   4   9    1.34    0.42
  -2  -4  -9    0.74    0.34
   2  -4   9    0.75    0.30
   2  -4   9    0.61    0.28
  -2  -4  -9    0.49    0.29
  -2   4  -9    0.59    0.17
   2  -4   9    0.80    0.35
  -2  -4  -9    0.42    0.53
  -2   4  -9    0.59    0.21
   2  -4   9    0.92    0.24
   2  -4   9    0.53    0.34
   5  -4   7    2.88    0.29
   5  -4   7    3.06    0.47
  -5  -4  -7    3.05    0.44
  -5  -4  -7    3.08    0.51
   5   4   7    2.94    0.24
   5   4   7    3.94    0.37
  -5   4  -7    3.50    0.31
  -5   4  -7    2.94    0.34
  -5  -4  -7    2.52    0.28
  -5  -4  -7    2.67    0.44
   5  -4   7    3.08    0.51
   5  -4   7    2.87    0.40
   5   4   7    2.08    0.46
  -5   4  -7    2.69    0.40
   9  -3   1    1.05    0.21
   9  -3   1    0.87    0.42
   9   3   1    1.00    0.37
  -9  -3  -1    0.63    0.37
  -9   3  -1    0.49    0.42
   9   3   1    1.39    0.42
  -9  -3  -1    1.00    0.27
   9  -3   1    0.79    0.21
  -9   3  -1    0.82    0.34
   9  -3   1    0.80    0.39
   0  -5   7    0.29    0.22
   0   5   7    0.07    0.20
   0  -5  -7   -0.44    0.51
   0  -5   7   -0.11    0.32
   0  -5  -7    0.17    0.19
   0  -5   7    0.01    0.28
   0  -5   7    0.12    0.16
   0  -5  -7   -0.09    0.40
   0  -5   7   -0.06    0.21
   0   5   7    0.11    0.40
   0   5   7   -0.09    0.36
   0  -6   0   47.04    2.21
   0   6   0   42.31    1.91
   0  -6   0   45.32    2.01
   0  -6   0   50.39    2.25
   0  -6   0   45.96    1.97
   0   6   0   48.64    2.07
  -3   0 -12    0.12    0.30
  -3   0 -12   -0.29    0.37
   3   0  12   -0.22    0.20
  -3   0 -12   -0.07    0.39
   3   0  12   -0.04    0.36
   3   0  12   -0.16    0.47
  -9   3   2    0.55    0.34
   9  -3  -2    0.33    0.22
  -9   3   2    0.31    0.42
   9  -3  -2    0.57    0.41
  -9  -3   2   -0.47    0.40
   9   3  -2    1.05    0.35
   9  -3  -2    0.72    0.19
  -9  -3   2    0.59    0.19
   9  -3  -2    0.20    0.26
  -9   3   2    0.94    0.46
   9  -3  -2    0.88    0.48
  -9  -3   2    0.39    0.39
   9   3  -2    0.24    0.28
   9   3  -2   -0.22    0.31
  -9  -3   2    0.65    0.16
  -9   0   7    1.81    0.46
   9   0  -7    0.41    0.23
  -9   0   7    1.78    0.53
   9   0  -7    1.35    0.47
   9   0  -7    0.99    0.39
  -9   0   7    0.13    0.28
   0  -3 -11    0.12    0.22
   0  -3  11    0.15    0.12
   0  -3  11    0.14    0.34
   0  -3 -11    0.55    0.43
   0  -3  11    0.51    0.42
   0   3  11   -0.16    0.34
   0  -3 -11    0.45    0.35
   0   3  11    0.19    0.25
   0  -3  11    0.22    0.23
   0   3 -11    0.26    0.16
   0   3 -11    0.17    0.30
   0   3  11   -0.51    0.49
   0  -3 -11    0.23    0.16
  -1  -5   7   -0.06    0.11
   1  -5  -7    0.19    0.43
  -1  -5   7   -0.08    0.26
  -1  -5   7   -0.21    0.17
  -1   5   7   -0.54    0.41
   1  -5  -7   -0.31    0.41
  -1  -5   7   -0.15    0.19
  -1  -5   7   -0.25    0.32
  -1   5   7   -0.31    0.40
  -1  -5   7    0.10    0.28
  -1   5   7    0.23    0.27
  -1  -5   7   -0.07    0.16
  -1   3  11    1.44    0.34
  -1  -3  11    1.38    0.13
   1  -3 -11    1.49    0.47
  -1  -3  11    1.42    0.39
   1  -3 -11    1.39    0.42
   1   3 -11    0.99    0.33
  -1   3  11    1.30    0.42
   1  -3 -11    0.89    0.18
   1   3 -11    1.36    0.19
  -1  -3  11    1.27    0.26
  -1   3  11    1.49    0.47
  -1  -3  11    0.89    0.34
   0  -6  -1    5.77    0.54
   0  -6   1    5.46    0.51
   0  -6   1    5.24    0.57
   0   6  -1    5.56    0.41
   0  -6  -1    4.42    0.56
   0  -6  -1    5.27    0.61
   0  -6   1    4.74    0.51
   0  -6  -1    6.63    0.40
   0   6  -1    5.66    0.48
   0   6   1    4.62    0.48
   0   6   1    4.87    0.39
   0  -6   1    7.31    0.45
   6  -3   8    8.06    0.60
  -6  -3  -8    6.97    0.53
   6  -3   8    7.94    0.67
  -6  -3  -8    8.95    0.51
  -6  -3  -8    8.70    0.64
  -6   3  -8    7.96    0.63
   6   3   8    8.24    0.52
  -6   3  -8    9.46    0.56
  -6  -3  -8    8.70    0.72
   6   3   8    8.46    0.74
   6  -3   8    7.49    0.61
   7   4   4    0.27    0.36
  -7   4  -4    0.19    0.34
   7   4   4    0.37    0.28
  -7  -4  -4    0.17    0.38
   7  -4   4   -0.28    0.43
  -7  -4  -4   -0.04    0.38
   7  -4   4    0.30    0.23
   7  -4   4    0.18    0.26
   7  -4   4   -0.19    0.39
  -7   4  -4    0.33    0.40
   0   2 -12    1.85    0.45
   0  -2 -12    2.83    0.47
   0  -2  12    2.25    0.48
   0  -2 -12    1.59    0.25
   0   2 -12    2.19    0.27
   0   2  12    2.10    0.31
   0   2  12    1.58    0.52
   0   2  12    1.44    0.45
   0  -2  12    1.65    0.35
   0  -2 -12    1.48    0.32
   0  -2  12    2.25    0.36
   0   2 -12    1.90    0.33
   0  -2 -12    1.84    0.21
  -4   5  -5    3.12    0.33
  -4  -5  -5    2.21    0.52
   4  -5   5    2.83    0.39
   4  -5   5    3.26    0.46
  -4   5  -5    2.81    0.32
   4  -5   5    2.45    0.45
  -4  -5  -5    3.18    0.42
   4   5   5    2.91    0.25
   4  -5   5    2.52    0.31
   4   5   5    2.65    0.52
  -4   4  -8    0.24    0.25
   4  -4   8    0.00    0.32
  -4  -4  -8    0.46    0.38
   4  -4   8   -0.47    0.40
   4   4   8    0.09    0.15
  -4   4  -8   -0.09    0.18
  -4  -4  -8   -0.15    0.48
   4  -4   8   -0.09    0.31
  -4  -4  -8    0.12    0.22
   4   4   8    0.69    0.50
   4  -4   8    0.22    0.19
   1  -6   0    2.58    0.46
  -1  -6   0    4.01    0.41
  -1  -6   0    3.51    0.48
  -1   6   0    3.41    0.38
  -1  -6   0    3.78    0.52
  -1  -6   0    4.37    0.35
  -1   6   0    3.73    0.34
   1   6   0    3.60    0.45
   1  -6   0    3.97    0.54
   1   6   0    3.63    0.32
   1  -6   0    3.74    0.37
   1  -6   0    3.39    0.44
  -5   5   4    9.52    0.52
  -5  -5   4   11.89    0.72
  -5  -5   4   10.40    0.50
   5   5  -4   10.71    0.68
   5  -5  -4   11.14    0.79
  -5   5   4   11.30    0.69
   5  -5  -4   12.01    0.76
   5  -5  -4    9.63    0.72
  -5  -5   4   10.26    0.68
  -5   5   4    9.64    0.68
   5  -5  -4    9.69    0.62
   1   2 -12    1.07    0.22
  -1   2  12    0.61    0.43
  -1   2  12    1.10    0.32
  -1  -2  12    0.98    0.30
   1   2 -12    1.00    0.42
   1  -2 -12    0.81    0.36
  -1  -2  12    1.26    0.38
   1  -2 -12    1.75    0.24
   1   2 -12    1.22    0.32
  -1   2  12    0.62    0.43
  -1  -2  12    0.92    0.42
   1  -2 -12    1.02    0.41
   1  -2 -12    0.87    0.19
   5   3   9    0.10    0.21
  -5   3  -9    0.16    0.24
   5  -3   9   -0.28    0.42
  -5  -3  -9   -0.06    0.22
   5  -3   9    0.53    0.39
   5   3   9   -0.03    0.12
  -5  -3  -9   -0.41    0.27
   5  -3   9    0.20    0.34
  -5   3  -9   -0.03    0.21
   5  -3   9   -0.06    0.22
  -5  -3  -9    0.60    0.49
  -5   3  -9   -0.08    0.32
  -5  -3  -9   -0.30    0.39
  -3  -5  -6    6.56    0.58
   3  -5   6    5.46    0.49
  -3  -5  -6    6.34    0.68
   3   5   6    4.75    0.60
   3   5   6    6.21    0.36
  -3   5  -6    6.42    0.38
   3  -5   6    5.66    0.55
  -3  -5  -6    5.30    0.47
   3  -5   6    6.80    0.53
  -3   5  -6    6.14    0.39
   4   0 -12    0.98    0.51
  -4   0  12    1.56    0.39
  -4   0  12    1.38    0.43
   4   0 -12    1.14    0.35
  -4   0  12    2.01    0.44
   4   0 -12    1.00    0.43
   1  -5   7    0.16    0.23
   1   5   7    0.19    0.20
   1   5   7    0.36    0.43
   1  -5   7    0.11    0.31
   1   5   7    0.01    0.39
   1  -5   7    0.01    0.15
   1  -5   7    0.13    0.26
  -1  -5  -7   -0.46    0.37
  -1  -5  -7    0.75    0.25
  -1  -5  -7    0.27    0.43
  -1   5  -7    0.18    0.12
  10   1  -4    0.55    0.23
  10  -1  -4    0.46    0.47
  10   1  -4    0.90    0.16
  10  -1  -4    0.72    0.49
  10  -1  -4    0.48    0.20
  10   1  -4    0.78    0.40
  10   1  -4    0.76    0.36
  10  -1  -4    0.81    0.28
 -10  -1   4    0.39    0.40
 -10   1   4    0.75    0.43
 -10   1   4    0.44    0.30
  10  -1  -4    0.85    0.21
 -10  -1   4    1.26    0.53
 -10  -1   4    0.55    0.24
 -10   1   4    0.37    0.46
 -10  -1  -3    0.91    0.16
  10   1   3    1.40    0.34
  10  -1   3    0.90    0.37
 -10  -1  -3    0.93    0.43
 -10   1  -3    0.41    0.46
  10   1   3    0.51    0.34
  10  -1   3    0.96    0.34
 -10  -1  -3    0.38    0.41
  10  -1   3    0.50    0.53
 -10   1  -3    0.95    0.24
 -10  -1  -3    0.63    0.22
  10   1   3    0.77    0.39
  -8   3  -5    0.98    0.35
  -8  -3  -5    0.69    0.12
  -8  -3  -5    0.53    0.30
   8  -3   5    0.81    0.41
  -8   3  -5    0.65    0.36
   8   3   5    1.13    0.49
  -8  -3  -5    0.96    0.32
   8  -3   5    0.65    0.32
  -8   3  -5    0.73    0.19
   8   3   5    0.38    0.28
  -8  -3  -5    0.26    0.36
   8  -3   5    0.32    0.45
   3  -4  -9    5.13    0.68
  -3  -4   9    3.78    0.44
   3  -4  -9    3.71    0.41
  -3  -4   9    4.53    0.31
  -3  -4   9    4.29    0.33
  -3   4   9    4.46    0.59
  -3   4   9    4.52    0.49
  -3  -4   9    4.98    0.63
  -3  -4   9    4.69    0.39
   3  -4  -9    4.19    0.51
  -3  -4   9    3.83    0.44
   3  -4  -9    3.03    0.45
  -3   4   9    4.65    0.59
   1  -6  -1    0.99    0.41
   1  -6  -1    1.04    0.31
  -1   6   1    0.90    0.20
  -1  -6   1    1.18    0.19
   1   6  -1    0.99    0.16
   1  -6  -1    1.34    0.26
  -1  -6   1    0.88    0.42
   1  -6  -1    0.58    0.42
  -1  -6   1    1.40    0.30
  -1   6   1    1.12    0.31
   5   0  11    1.56    0.54
  -5   0 -11    1.49    0.42
  -5   0 -11    0.90    0.30
   5   0  11    0.96    0.28
  -5   0 -11    0.91    0.29
  -5   0 -11    0.99    0.26
   5   0  11    1.12    0.36
   6  -1  10    0.01    0.28
  -6  -1 -10    0.23    0.44
   6  -1  10   -0.27    0.32
  -6   1 -10    0.09    0.22
   6   1  10    0.39    0.29
  -6   1 -10    0.41    0.35
   6   1  10    0.23    0.54
  -6  -1 -10    0.14    0.17
   6   1  10   -0.20    0.30
  -6   1 -10    0.51    0.43
  -6  -1 -10   -0.01    0.30
  -6  -1 -10    0.12    0.42
  -6  -1 -10   -0.18    0.30
  -6   1 -10    0.09    0.14
   6  -1  10   -0.38    0.39
   1   6   1    0.67    0.34
  -1  -6  -1    1.16    0.20
   1  -6   1    0.28    0.33
   1  -6   1    0.78    0.39
   1  -6   1    0.77    0.33
  -1   6  -1    0.73    0.19
  -1  -6  -1    0.84    0.26
  -1  -6  -1    0.53    0.37
  -1  -6  -1    0.51    0.43
   1  -6   1    0.70    0.26
   7   1   9   -0.22    0.44
   7  -1   9   -0.15    0.38
  -7   1  -9    0.16    0.24
  -7   1  -9    0.46    0.38
  -7  -1  -9    0.10    0.43
   7  -1   9    0.34    0.36
  -7  -1  -9   -0.28    0.34
  -7  -1  -9   -0.07    0.13
  -7  -1  -9   -0.31    0.38
  -7   1  -9    0.07    0.09
   7   1   9   -0.02    0.31
  -7   1  -9    0.11    0.43
  -7  -1  -9   -0.04    0.31
  -6  -4  -6    4.04    0.46
  -6   4  -6    3.42    0.46
   6  -4   6    4.66    0.47
   6  -4   6    3.23    0.48
  -6  -4  -6    3.80    0.56
  -6   4  -6    2.61    0.37
  -6  -4  -6    2.40    0.41
   6   4   6    2.88    0.49
  -6  -4  -6    2.94    0.41
  -6   4  -6    4.78    0.39
  -6  -4  -6    1.88    0.22
   6   4   6    3.29    0.37
   6  -4   6    2.38    0.42
   1  -3  11   10.61    0.68
   1  -3  11   10.73    0.79
  -1  -3 -11   10.69    0.62
   1   3  11   11.03    0.84
  -1   3 -11   12.23    0.62
  -1   3 -11   11.18    0.57
  -1  -3 -11   11.36    0.73
   1   3  11   11.59    0.77
   1  -3  11   10.01    0.75
   1  -3  11    9.16    0.55
   1   3  11   11.02    0.61
   1  -3  11   11.48    0.63
  -1  -3 -11   11.45    0.88
  -1   3 -11   10.40    0.67
  -1  -3 -11   11.53    0.76
  -8   0  -8   15.45    0.86
  -8   0  -8   16.58    0.95
  -8   0  -8   17.07    0.92
   8   0   8   16.74    0.94
  -8   0  -8   18.67    1.08
  -8   0  -8   17.13    0.76
   8   0   8   15.45    0.91
 -10   2   1    1.28    0.31
  10  -2  -1    1.10    0.43
  10  -2  -1    0.57    0.44
 -10  -2   1    0.50    0.37
 -10  -2   1    0.96    0.20
  10  -2  -1    1.09    0.20
  10   2  -1    1.43    0.42
 -10   2   1    1.17    0.52
 -10  -2   1    1.00    0.21
  10   2  -1    0.76    0.34
 -10  -2   1    0.63    0.45
  10  -2  -1    0.96    0.23
  10   2  -1    0.97    0.32
 -10   2   1    0.37    0.43
  10   2   0    0.34    0.32
  10  -2   0    0.04    0.43
 -10   2   0    0.30    0.42
  10  -2   0    0.37    0.42
  10  -2   0   -0.00    0.14
 -10   2   0   -0.09    0.41
 -10   2   0   -0.00    0.29
 -10  -2   0    0.04    0.47
 -10  -2   0    0.11    0.21
 -10  -2   0    0.03    0.16
  10  -2   0    0.35    0.21
  10   2   0    0.44    0.36
  -6   5   0    2.62    0.37
   6  -5   0    2.97    0.50
   6  -5   0    3.54    0.34
  -6  -5   0    3.36    0.46
  -6  -5   0    2.99    0.45
   6  -5   0    3.26    0.48
  -6   5   0    3.67    0.48
  -6  -5   0    2.39    0.43
   6   5   0    3.88    0.36
   6   5   0    2.70    0.45
  -6  -5   0    3.36    0.27
  -6   5   0    2.96    0.34
   6  -5   0    3.03    0.40
   6  -5   0    3.55    0.42
   7   2  -9    1.30    0.38
  -7   2   9    1.23    0.46
   7   2  -9    1.20    0.19
  -7  -2   9    1.50    0.25
   7  -2  -9    1.38    0.30
  -7  -2   9    1.31    0.42
   7  -2  -9    0.72    0.45
  -7   2   9    1.65    0.29
   7   2  -9    1.58    0.35
  -7  -2   9    1.64    0.44
   7   2  -9    1.64    0.38
  -7   2   9    2.05    0.41
   7  -2  -9    1.69    0.43
  -9   1  -6   15.45    0.95
  -9   1  -6   14.28    0.75
   9  -1   6   14.38    0.85
  -9  -1  -6   15.05    0.84
  -9  -1  -6   12.60    0.72
   9  -1   6   13.61    0.84
  -9   1  -6   15.25    0.94
   9   1   6   14.01    0.83
  -9   1  -6   13.17    0.76
   9   1   6   14.87    0.85
   9  -1   6   12.15    0.75
  -9  -1  -6   12.90    0.80
  -9  -3  -2    0.61    0.36
   9  -3   2    1.20    0.41
  -9   3  -2    0.48    0.42
   9  -3   2    1.13    0.28
   9   3   2    0.41    0.36
  -9  -3  -2    0.99    0.29
   9  -3   2    0.50    0.17
   9  -3   2    0.79    0.45
   6  -2 -10    0.72    0.42
   6   2 -10    0.59    0.33
   6  -2 -10    0.51    0.35
  -6  -2  10    0.53    0.33
   6   2 -10    0.90    0.31
   6   2 -10    0.72    0.38
   6  -2 -10    0.34    0.39
  -6   2  10    0.32    0.40
  -6   2  10    0.69    0.23
  -6  -2  10    0.48    0.29
   6  -2 -10    0.55    0.31
  -6  -2  10    0.74    0.29
  -6  -2  10    0.71    0.39
  -6   2  10    0.83    0.46
  -1   2 -12    2.41    0.28
   1  -2  12    2.29    0.36
  -1  -2 -12    2.83    0.45
   1   2  12    2.14    0.45
  -1   2 -12    2.59    0.46
   1  -2  12    1.66    0.30
  -1  -2 -12    2.75    0.44
   1   2  12    2.11    0.29
   1   2  12    2.29    0.50
   1  -2  12    2.71    0.50
  -1  -2 -12    2.33    0.33
   7  -4  -5    2.00    0.43
  -7   4   5    1.22    0.43
   7  -4  -5    1.13    0.39
   7   4  -5    1.76    0.34
   7   4  -5    2.28    0.38
  -7   4   5    1.28    0.41
   7  -4  -5    1.53    0.35
  -7  -4   5    1.54    0.22
  -7  -4   5    2.26    0.40
   7   4  -5    2.15    0.31
  -7   4   5    1.95    0.33
  -7  -4   5    2.52    0.45
   7  -4  -5    1.87    0.45
   6   5  -1    1.04    0.21
  -6   5   1    0.65    0.33
   6   5  -1    0.88    0.39
   6  -5  -1    1.88    0.42
  -6  -5   1    0.98    0.31
   6  -5  -1    0.64    0.32
   6  -5  -1    1.11    0.40
  -6  -5   1    1.11    0.29
  -6  -5   1    0.97    0.14
  -6   5   1    0.78    0.34
   6  -5  -1    0.96    0.36
  -6  -5   1    1.29    0.37
   0  -6   2    1.61    0.41
   0  -6  -2    1.40    0.44
   0   6   2    1.32    0.37
   0   6  -2    1.66    0.20
   0  -6   2    1.61    0.23
   0  -6  -2    0.96    0.46
   0  -6  -2    1.86    0.41
   0  -6  -2    1.48    0.20
   0  -6   2    1.22    0.31
   7   0 -10   -0.07    0.19
   7   0 -10   -0.02    0.43
   7   0 -10   -0.03    0.35
  -7   0  10   -0.06    0.25
  -7   0  10   -0.06    0.34
   7   0 -10   -0.21    0.37
  -7   0  10    0.27    0.30
  -7   0  10   -0.26    0.50
   2  -3 -11    0.77    0.44
  -2  -3  11    0.51    0.39
   2   3 -11    0.31    0.29
   2   3 -11    0.39    0.37
  -2   3  11    1.03    0.44
   2  -3 -11    0.56    0.23
   2  -3 -11    0.20    0.48
  -2   3  11    0.36    0.29
  -2  -3  11    0.12    0.36
  -2   3  11    0.06    0.43
   2  -3 -11    1.50    0.41
  -2  -3  11    0.68    0.26
   2   3 -11    0.59    0.16
  -9  -3   3    4.77    0.37
   9   3  -3    4.20    0.45
   9   3  -3    3.99    0.46
   9  -3  -3    4.27    0.44
   9   3  -3    4.98    0.52
  -9  -3   3    4.38    0.54
   9  -3  -3    4.12    0.59
  -9   3   3    4.34    0.48
   9  -3  -3    4.72    0.61
  -9   3   3    4.26    0.51
   9  -3  -3    4.77    0.42
  -9  -3   3    4.64    0.55
   9  -3  -3    4.57    0.39
   8   3  -6    3.67    0.44
  -8   3   6    4.92    0.56
  -8   3   6    4.35    0.49
   8  -3  -6    3.78    0.37
   8   3  -6    3.65    0.38
   8   3  -6    4.12    0.43
   8  -3  -6    4.16    0.56
   8   3  -6    4.33    0.47
  -8   3   6    4.18    0.50
  -8  -3   6    4.26    0.56
  -8  -3   6    3.75    0.54
   8  -3  -6    3.78    0.47
  -8  -3   6    4.02    0.35
   8  -3  -6    3.71    0.48
  -2   5   7    1.42    0.34
   2  -5  -7    1.49    0.43
  -2  -5   7    1.42    0.19
  -2  -5   7    1.47    0.25
  -2  -5   7    1.55    0.18
  -2  -5   7    1.91    0.23
  -2   5   7    1.34    0.37
   2  -5  -7    1.84    0.45
  -2  -5   7    1.71    0.32
   2  -5  -7    1.94    0.57
  -8  -4   0    0.99    0.26
   8   4   0    0.89    0.31
   8  -4   0    0.84    0.28
  -8   4   0    1.39    0.46
   8  -4   0    0.90    0.23
   8   4   0    0.29    0.39
  -8  -4   0    0.94    0.13
   8  -4   0    1.14    0.28
   8  -4   0    0.62    0.41
  -8   4   0    0.92    0.39
   8  -4   0    0.54    0.40
  -8  -4   0    0.32    0.38
  -8  -4   0    0.81    0.41
  -8  -4   1    0.76    0.40
  -8   4   1   -0.09    0.34
   8  -4  -1   -0.29    0.39
  -8   4   1    0.03    0.35
  -8   4   1   -0.03    0.29
   8  -4  -1    0.42    0.36
  -8  -4   1   -0.11    0.36
   8  -4  -1    0.44    0.32
  -8  -4   1    0.19    0.12
  -8  -4   1   -0.03    0.22
   8   4  -1   -0.09    0.23
   8   4  -1    0.17    0.38
   8  -4  -1   -0.09    0.21
   8  -4  -1   -0.20    0.26
  -3   1 -12    1.99    0.38
  -3  -1 -12    2.20    0.38
   3   1  12    2.15    0.21
  -3   1 -12    2.47    0.30
  -3  -1 -12    2.78    0.41
   3  -1  12    2.19    0.40
  -3   1 -12    2.25    0.49
   3  -1  12    1.91    0.51
  -3  -1 -12    1.94    0.38
   3   1  12    2.09    0.47
  -3   1 -12    1.63    0.40
   3  -1  12    1.38    0.25
  -3   1 -12    1.66    0.30
   3   1  12    2.03    0.54
  -2   2  12    0.50    0.35
  -2  -2  12    0.37    0.38
   2   2 -12    0.35    0.28
   2  -2 -12   -0.02    0.38
  -2   2  12    0.08    0.41
  -2  -2  12    0.54    0.31
  -2  -2  12   -0.03    0.35
  -2   2  12    0.66    0.41
   2   2 -12    0.48    0.21
   2  -2 -12    0.59    0.22
   2   2 -12    0.59    0.44
   9   1  -7   34.23    1.66
   9   1  -7   33.40    1.59
  -9   1   7   32.84    1.64
  -9  -1   7   35.93    1.77
   9  -1  -7   34.48    1.65
   9  -1  -7   33.77    1.66
  -9  -1   7   37.17    1.80
  -9   1   7   36.27    1.73
   9   1  -7   36.43    1.59
   9  -1  -7   34.87    1.55
  -9   1   7   32.01    1.48
   9  -1  -7   34.94    1.71
   9   1  -7   35.92    1.58
  -7  -3  -7    4.27    0.50
  -7  -3  -7    4.29    0.49
   7  -3   7    3.82    0.47
   7  -3   7    3.45    0.46
  -7   3  -7    2.96    0.49
  -7   3  -7    4.45    0.50
   7  -3   7    3.46    0.49
   7   3   7    3.41    0.40
  -7  -3  -7    3.54    0.29
  -7   3  -7    4.09    0.37
  -7  -3  -7    3.44    0.46
   7   3   7    4.10    0.59
  -6  -5  -1    1.39    0.39
  -6   5  -1    1.31    0.31
   6  -5   1    1.54    0.20
  -6  -5  -1    1.38    0.34
   6  -5   1    1.82    0.36
   6   5   1    1.44    0.40
   6  -5   1    1.25    0.31
   6  -5   1    1.32    0.35
  -6  -5  -1    1.61    0.41
   6  -5   1    0.97    0.42
  -6   5  -1    1.13    0.33
  -6  -5  -1    1.51    0.17
   6   5   1    1.69    0.24
   9  -2   5    0.70    0.35
  -9  -2  -5    0.03    0.10
   9  -2   5    0.18    0.50
   9   2   5    0.16    0.40
  -9  -2  -5    0.29    0.36
   9   2   5    0.19    0.34
   9  -2   5   -0.04    0.35
  -9  -2  -5    0.17    0.27
  -9   2  -5    0.34    0.37
  -9  -2  -5   -0.27    0.39
  -9   2  -5    0.04    0.39
   1  -6  -2    2.13    0.30
  -1  -6   2    2.10    0.23
  -1  -6   2    2.14    0.46
   1  -6  -2    2.63    0.39
   1   6  -2    2.02    0.22
  -1  -6   2    2.11    0.27
   1  -6  -2    2.13    0.47
   1  -6  -2    2.04    0.48
  -1   6   2    1.46    0.35
  -8  -2  -7    0.04    0.13
   8   2   7    0.19    0.32
   8  -2   7   -0.11    0.44
   8  -2   7    0.09    0.37
  -8   2  -7    0.02    0.45
  -8  -2  -7   -0.08    0.31
  -8  -2  -7   -0.33    0.36
   8  -2   7    0.03    0.32
  -8  -2  -7   -0.30    0.32
  -8   2  -7   -0.00    0.32
  10   2  -2   20.89    1.07
 -10  -2   2   19.27    1.05
 -10   2   2   20.06    1.11
  10  -2  -2   18.96    1.07
  10   2  -2   20.18    1.05
 -10   2   2   18.76    1.08
 -10  -2   2   19.55    0.92
 -10  -2   2   18.37    0.87
  10  -2  -2   20.77    1.17
 -10   2   2   20.18    1.03
  10  -2  -2   19.84    0.94
  10   2  -2   19.75    1.06
 -10  -2   2   19.07    1.10
   5  -5   4   28.50    1.37
   5  -5   4   27.49    1.37
  -5  -5  -4   29.26    1.48
  -5   5  -4   29.74    1.40
   5  -5   4   29.51    1.45
  -5   5  -4   30.88    1.43
  -5  -5  -4   30.67    1.45
   5  -5   4   30.42    1.39
  10   2   1    0.65    0.31
 -10   2  -1   -0.00    0.26
  10   2   1    0.57    0.33
  10  -2   1    0.75    0.28
  10  -2   1    1.09    0.51
 -10   2  -1    0.31    0.43
  10  -2   1    0.18    0.14
 -10  -2  -1    0.39    0.23
 -10  -2  -1    0.27    0.45
  10  -2   1    0.72    0.43
 -10   2  -1    0.87    0.47
 -10  -2  -1    0.40    0.17
  10   0  -5   -0.17    0.19
  10   0  -5   -0.02    0.37
 -10   0   5    0.57    0.54
  10   0  -5    0.09    0.32
 -10   0   5   -0.56    0.46
  10   0  -5    0.05    0.19
 -10   0   5   -0.25    0.27
  10   0  -5    0.26    0.49
  -1  -6  -2    1.25    0.46
  -1  -6  -2    1.32    0.28
  -1  -6  -2    1.95    0.22
  -1   6  -2    1.56    0.21
   1  -6   2    0.81    0.29
   1  -6   2    2.58    0.34
   1   6   2    2.07    0.42
   1  -6   2    2.06    0.46
  -1  -6  -2    1.64    0.46
   1  -6   2    0.94    0.33
 -10   0  -4    1.09    0.27
  10   0   4    1.28    0.41
 -10   0  -4    1.14    0.17
  10   0   4    1.38    0.36
 -10   0  -4    0.85    0.36
  -2  -6   0    0.80    0.23
   2  -6   0    0.43    0.34
   2  -6   0    0.49    0.26
  -2  -6   0    0.59    0.42
   2  -6   0    0.98    0.39
   2  -6   0    0.47    0.39
   2   6   0    0.74    0.31
   2   6   0    0.66    0.14
  -2   6   0    0.53    0.24
  -2  -6   0    1.04    0.22
   4   2  11    2.62    0.23
  -4  -2 -11    2.36    0.37
   4  -2  11    2.53    0.35
  -4  -2 -11    2.35    0.42
   4  -2  11    2.64    0.53
  -4   2 -11    3.07    0.44
  -4  -2 -11    2.21    0.46
   4  -2  11    2.53    0.39
   4   2  11    2.63    0.45
  -4   2 -11    2.33    0.44
  -4   2 -11    2.51    0.27
   4   2  11    2.59    0.56
  -4  -2 -11    2.46    0.37
   4   2  11    2.46    0.28
   8  -4   1    1.30    0.27
   8   4   1    1.36    0.43
  -8  -4  -1    1.91    0.19
   8  -4   1    1.61    0.47
  -8   4  -1    1.80    0.45
   8  -4   1    2.02    0.47
   8   4   1    2.15    0.33
   8  -4   1    2.19    0.27
  -8   4  -1    1.49    0.33
  -8  -4  -1    1.63    0.36
  -8  -4  -1    1.41    0.42
  -8  -4  -1    1.56    0.32
  -9   2   6    5.00    0.48
  -9  -2   6    4.58    0.58
   9   2  -6    4.54    0.45
   9  -2  -6    4.33    0.40
  -9   2   6    4.32    0.50
   9  -2  -6    4.08    0.54
   9  -2  -6    4.53    0.61
   9   2  -6    3.27    0.32
   9   2  -6    4.43    0.50
  -9   2   6    4.29    0.54
  -9  -2   6    3.58    0.51
   6   5  -2   10.32    0.56
  -6   5   2    8.86    0.64
  -6  -5   2   10.42    0.51
   6  -5  -2    9.69    0.72
  -6  -5   2    9.22    0.64
   6   5  -2    9.16    0.69
  -6  -5   2    9.66    0.64
  -6   5   2    9.73    0.66
   6  -5  -2    9.50    0.69
  -6  -5   2    9.14    0.57
   6  -5  -2    9.38    0.62
   6  -5  -2   10.00    0.69
   6   0 -11   -0.17    0.24
   6   0 -11   -0.60    0.38
  -6   0  11   -0.06    0.23
  -6   0  11   -0.00    0.35
  -6   0  11    0.21    0.37
   6   0 -11    0.32    0.44
  -6   0  11   -0.01    0.28
   6   0 -11    0.16    0.40
   4   1 -12    4.83    0.55
  -4   1  12    5.67    0.62
  -4   1  12    5.83    0.60
  -4  -1  12    5.53    0.58
  -4  -1  12    5.24    0.48
   4   1 -12    4.77    0.51
   4   1 -12    5.39    0.64
   4   1 -12    5.43    0.45
  -4   1  12    4.54    0.53
   4  -1 -12    3.88    0.42
   4  -1 -12    4.96    0.61
  -4  -1  12    5.55    0.61
   4  -1 -12    6.37    0.62
   2  -6  -1   16.20    0.90
   2  -6  -1   15.93    0.82
  -2  -6   1   18.60    0.89
   2  -6  -1   17.92    0.98
  -2   6   1   17.46    0.85
   2   6  -1   18.91    0.85
  -2  -6   1   18.92    0.92
  -2   6   1   17.18    0.90
   2   6  -1   17.50    0.95
   2  -6  -1   17.03    1.01
  -2  -6   1   17.18    1.01
  -8   4   2    0.82    0.38
   8  -4  -2    0.05    0.46
  -8   4   2   -0.12    0.35
  -8   4   2   -0.11    0.35
   8   4  -2    0.39    0.30
   8  -4  -2    0.83    0.23
  -8  -4   2    0.52    0.17
  -8  -4   2    0.57    0.34
   8   4  -2    0.70    0.39
   8  -4  -2    0.80    0.41
   8  -4  -2    0.39    0.34
  -8  -4   2    0.66    0.41
   8  -4  -2    0.40    0.28
   8   0  -9    0.08    0.19
   8   0  -9   -0.20    0.39
   8   0  -9    0.02    0.41
  -8   0   9    0.11    0.41
   8   0  -9    0.08    0.37
  -8   0   9   -0.11    0.34
  -5  -1 -11    2.68    0.39
  -5   1 -11    3.84    0.52
   5   1  11    2.57    0.52
  -5   1 -11    2.53    0.47
   5  -1  11    2.86    0.50
   5  -1  11    2.37    0.36
  -5  -1 -11    3.33    0.55
  -5   1 -11    2.73    0.31
   5  -1  11    2.44    0.40
  -5   1 -11    2.95    0.47
   5   1  11    2.52    0.32
  -5  -1 -11    2.00    0.30
   5   1  11    2.79    0.42
  -5  -1 -11    2.41    0.44
  -5  -1 -11    2.56    0.37
   4  -3  10   12.78    0.80
  -4  -3 -10   12.86    0.89
  -4  -3 -10   14.40    0.84
   4  -3  10   14.34    0.90
  -4   3 -10   14.48    0.79
   4   3  10   13.79    0.65
   4   3  10   15.96    0.91
  -4  -3 -10   14.09    0.83
   4  -3  10   14.73    0.78
  -4   3 -10   13.43    0.80
  -4  -3 -10   12.63    0.75
   2   6   1    6.67    0.59
   2  -6   1    7.18    0.62
  -2  -6  -1    6.61    0.60
  -2  -6  -1    6.93    0.45
   2  -6   1    6.14    0.54
  -2  -6  -1    7.57    0.48
  -2   6  -1    6.84    0.43
   2  -6   1    5.79    0.56
  -2  -6  -1    7.35    0.60
   2  -6   1    7.41    0.51
  -2  -5  -7   -0.23    0.48
   2  -5   7   -0.00    0.29
  -2   5  -7    0.15    0.11
   2   5   7   -0.22    0.43
  -2  -5  -7   -0.01    0.20
   2  -5   7    0.24    0.26
  -2   5  -7    0.34    0.14
   2  -5   7    0.15    0.14
   2  -5   7    0.36    0.25
   2   5   7    0.23    0.18
  -2  -5  -7   -0.48    0.46
   5   4  -8    6.32    0.41
  -5  -4   8    4.99    0.51
  -5   4   8    4.78    0.57
  -5  -4   8    6.36    0.42
   5   4  -8    6.04    0.44
   5  -4  -8    6.31    0.68
  -5   4   8    5.74    0.59
  -5   4   8    6.29    0.59
   5  -4  -8    6.10    0.48
   5  -4  -8    5.62    0.56
  -5  -4   8    5.38    0.56
  -5   4   8    6.96    0.43
  -3  -4  -9    6.73    0.48
   3  -4   9    8.18    0.65
  -3   4  -9    8.05    0.48
  -3  -4  -9    8.76    0.60
   3  -4   9    8.84    0.62
  -3  -4  -9    7.60    0.68
   3   4   9    8.81    0.64
   3  -4   9    8.68    0.51
  -3  -4  -9    9.73    0.70
  -3   4  -9    7.99    0.52
   3  -4   9    7.75    0.62
   3   4   9    7.11    0.65
   3   4   9    9.07    0.48
   6  -3  -9    1.91    0.41
  -6  -3   9    1.62    0.37
   6  -3  -9    1.82    0.36
   6   3  -9    1.57    0.42
   6  -3  -9    1.76    0.44
  -6   3   9    1.71    0.27
   6   3  -9    1.81    0.31
  -6  -3   9    1.81    0.40
  -6   3   9    2.27    0.51
  -6   3   9    2.00    0.40
   6   3  -9    2.19    0.38
  -6  -3   9    1.69    0.29
   8   1   8   -0.00    0.48
  -8  -1  -8    0.13    0.29
  -8   1  -8   -0.01    0.26
  -8   1  -8   -0.06    0.42
  -8  -1  -8   -0.21    0.37
   8  -1   8    0.36    0.38
   8   1   8    0.55    0.34
   8  -1   8    0.14    0.37
  -8  -1  -8    0.24    0.29
   8  -1   8   -0.03    0.28
  -8  -1  -8    0.28    0.31
  -8   1  -8   -0.43    0.31
  -8  -1  -8   -0.05    0.11
   4  -5  -6    5.34    0.56
  -4   5   6    6.01    0.45
  -4   5   6    6.12    0.48
  -4  -5   6    5.91    0.27
  -4  -5   6    5.99    0.23
   4  -5  -6    6.19    0.51
  -4   5   6    5.49    0.40
  -4  -5   6    5.90    0.57
  -4   5   6    5.34    0.58
   4  -5  -6    6.06    0.55
  -4  -5   6    5.36    0.51
   4  -5  -6    5.01    0.47
  -6  -4   7    1.57    0.37
  -6   4   7    1.48    0.28
   6  -4  -7    0.21    0.35
  -6   4   7    0.56    0.43
  -6   4   7    0.95    0.44
  -6  -4   7    0.66    0.23
   6   4  -7    1.43    0.35
  -6  -4   7    1.40    0.40
   6  -4  -7    1.16    0.50
  -6   4   7    1.32    0.39
   6  -4  -7    0.93    0.49
   6   4  -7    0.97    0.50
   6   4  -7    1.54    0.40
   6   4  -7    1.24    0.24
   0   0  13   -0.17    0.25
   0   0  13   -0.46    0.45
   0   0 -13   -0.41    0.43
   0   0 -13   -0.20    0.27
   0   0 -13    0.10    0.38
   0   0 -13    0.02    0.13
   0   0 -13   -0.22    0.24
   0   0  13   -0.09    0.37
  -8   2   8    1.14    0.40
   8  -2  -8    1.01    0.28
  -8   2   8    1.22    0.35
   8   2  -8    1.01    0.21
  -8   2   8    0.74    0.35
   8   2  -8    1.12    0.35
   8   2  -8    0.88    0.18
  -8  -2   8    0.89    0.41
  -8  -2   8    1.12    0.44
  -8   2   8    1.38    0.42
   8   2  -8    1.81    0.40
   8   2  -8    1.52    0.38
   8  -2  -8    1.20    0.43
  -8  -2   8    0.87    0.28
   7   1 -10   -0.20    0.17
  -7   1  10    0.44    0.28
  -7  -1  10    0.31    0.29
   7   1 -10    0.29    0.41
   7  -1 -10    0.34    0.28
   7   1 -10   -0.03    0.38
  -7   1  10    0.30    0.29
   7   1 -10    0.40    0.33
  -7  -1  10    0.04    0.27
  -7  -1  10    0.09    0.26
   7  -1 -10   -0.12    0.47
  -7   1  10    0.30    0.47
  -7  -1  10   -0.06    0.50
   7  -1 -10   -0.19    0.41
   7  -1 -10   -0.00    0.40
  -1   0  13    1.96    0.41
   1   0 -13    2.53    0.48
   1   0 -13    2.49    0.34
  -1   0  13    2.07    0.50
   1   0 -13    3.24    0.61
   1   0 -13    2.16    0.27
  -1   0  13    2.24    0.38
   1   0 -13    2.09    0.33
   2  -3  11    5.20    0.44
   2   3  11    5.43    0.57
  -2  -3 -11    6.99    0.51
   2   3  11    5.95    0.32
   2  -3  11    6.38    0.63
  -2   3 -11    7.01    0.53
  -2  -3 -11    5.91    0.62
  -2  -3 -11    4.54    0.47
   2  -3  11    5.57    0.52
  -2   3 -11    4.70    0.36
   2   3  11    4.73    0.59
  -2  -3 -11    4.93    0.56
  -6  -5  -2    0.22    0.30
  -6  -5  -2    0.09    0.17
   6  -5   2    0.29    0.20
   6  -5   2   -0.02    0.38
  -6  -5  -2    0.26    0.37
   6   5   2   -0.19    0.38
  -6   5  -2    0.09    0.34
   6   5   2    0.44    0.20
   6  -5   2    0.14    0.26
   6  -5   2    0.49    0.33
   6  -5   2   -0.13    0.28
  -6   5  -2    0.15    0.29
  -6  -5  -2    0.27    0.38
   0  -6   3   19.75    0.99
   0   6  -3   18.47    0.85
   0  -6  -3   19.88    1.08
   0  -6  -3   20.23    1.16
   0  -6   3   21.47    1.01
   0  -6  -3   18.97    0.98
   0  -6   3   20.63    1.13
   0  -6   3   19.46    0.91
  -5  -2  11    1.34    0.26
   5   2 -11    1.32    0.35
  -5   2  11    1.29    0.20
   5  -2 -11    0.70    0.48
  -5   2  11    1.62    0.45
   5   2 -11    1.25    0.47
   5  -2 -11    1.24    0.33
   5  -2 -11    1.06    0.50
   5  -2 -11    1.38    0.27
  -5  -2  11    1.38    0.29
  -5  -2  11    1.14    0.34
  -5   2  11    1.20    0.40
  -5  -2  11    1.04    0.46
   5   2 -11    1.20    0.33
  -5   2  11    1.71    0.37
  -2  -6   2    4.08    0.32
   2  -6  -2    3.46    0.55
  -2  -6   2    2.96    0.31
   2  -6  -2    3.42    0.38
   2  -6  -2    2.96    0.43
  -2   6   2    2.72    0.39
  -2  -6   2    3.10    0.32
   2  -6  -2    2.99    0.49
   2   6  -2    3.05    0.25
  -2  -6   2    2.69    0.44
  -2   6   2    2.46    0.30
   2   6  -2    2.89    0.33
 -10  -2   3    5.52    0.61
  10  -2  -3    5.95    0.58
  10   2  -3    4.84    0.48
  10   2  -3    7.22    0.59
 -10   2   3    6.60    0.59
 -10  -2   3    6.38    0.65
 -10   2   3    5.49    0.51
  10  -2  -3    6.42    0.42
 -10  -2   3    5.58    0.43
  10   2  -3    7.19    0.59
  10   2   2    4.64    0.51
 -10  -2  -2    5.83    0.47
  10  -2   2    6.73    0.50
  10  -2   2    6.92    0.68
 -10   2  -2    5.48    0.49
 -10  -2  -2    7.01    0.56
  10   2   2    6.41    0.52
 -10  -2  -2    5.74    0.64
  10   2   2    6.45    0.57
 -10   2  -2    7.13    0.44
 -10   2  -2    5.79    0.61
  10  -2   2    6.62    0.60
   2   2  12   11.05    0.71
  -2   2 -12   12.69    0.81
   2  -2  12   10.82    0.66
   2   2  12   11.91    0.88
  -2   2 -12   11.25    0.61
  -2  -2 -12   10.70    0.68
  -2  -2 -12   12.72    0.89
   2  -2  12    8.95    0.53
  -2  -2 -12   11.15    0.65
   2   2  12   11.64    0.60
  -2  -2 -12   11.01    0.73
   2  -2  12   10.24    0.73
   7  -3  -8    0.08    0.36
   7  -3  -8    0.86    0.40
  -7  -3   8    0.37    0.44
  -7   3   8   -0.04    0.44
   7   3  -8    0.48    0.30
  -7  -3   8    0.38    0.37
   7   3  -8    0.44    0.16
   7   3  -8    0.32    0.36
   7   3  -8    0.34    0.34
  -7   3   8    0.26    0.27
  -7  -3   8    0.18    0.20
  -7   3   8    0.31    0.40
  -7   3   8    0.25    0.35
   7  -3  -8   -0.03    0.29
  -9  -3  -3   22.38    0.98
   9  -3   3   21.50    1.17
  -9   3  -3   22.41    1.21
   9  -3   3   21.89    1.07
   9   3   3   24.53    1.21
   9  -3   3   22.69    1.03
   9  -3   3   22.10    1.18
   9   3   3   22.92    1.23
  -9  -3  -3   22.29    1.19
  -9   3  -3   21.65    1.16
  -9  -3  -3   21.33    1.13
  -8   4  -2    0.42    0.40
   8  -4   2    0.07    0.23
   8  -4   2    0.58    0.45
  -8  -4  -2   -0.20    0.33
   8  -4   2    0.05    0.44
   8   4   2    0.31    0.42
  -8   4  -2   -0.13    0.26
   8  -4   2    0.01    0.19
  -8   4  -2   -0.06    0.41
  -8  -4  -2   -0.03    0.30
   5  -5  -5   11.16    0.78
   5  -5  -5   11.91    0.72
   5  -5  -5    9.75    0.66
  -5  -5   5    9.80    0.64
   5  -5  -5   11.93    0.82
  -5  -5   5   11.56    0.55
  -5  -5   5   10.95    0.74
  -5   5   5   11.65    0.72
  -5   5   5    9.96    0.54
  -5  -5   5   12.35    0.62
  -5   5   5   10.06    0.67
  -5   5   5   11.70    0.78
 -10   1   5    2.18    0.47
  10   1  -5    3.19    0.28
  10   1  -5    3.22    0.52
 -10  -1   5    3.22    0.33
  10  -1  -5    2.97    0.29
 -10   1   5    3.12    0.40
  10   1  -5    3.46    0.38
 -10  -1   5    3.43    0.61
 -10  -1   5    3.14    0.55
  10  -1  -5    2.95    0.49
  10   1  -5    3.62    0.49
  10   1  -5    2.09    0.25
  10  -1  -5    2.80    0.37
  10  -1  -5    2.87    0.53
  10  -1  -5    2.31    0.26
 -10   1   5    3.49    0.53
  10   1   4   30.99    1.50
 -10  -1  -4   30.77    1.42
  10  -1   4   29.01    1.47
 -10   1  -4   29.56    1.49
  10  -1   4   27.63    1.37
 -10  -1  -4   27.27    1.41
 -10   1  -4   30.76    1.39
  10  -1   4   29.22    1.42
 -10   1  -4   28.97    1.31
 -10  -1  -4   28.34    1.40
  -1  -6   3    0.19    0.34
  -1   6   3    0.44    0.36
  -1  -6   3    0.20    0.17
  -1  -6   3    0.25    0.26
   1  -6  -3   -0.05    0.37
   1  -6  -3    0.09    0.23
   1  -6  -3    0.75    0.46
   1  -6  -3    0.33    0.45
  -2  -6  -2    0.31    0.28
   2  -6   2    0.31    0.17
   2  -6   2    0.34    0.29
   2  -6   2    0.03    0.24
  -2  -6  -2    0.27    0.25
   2  -6   2    0.36    0.29
  -2  -6  -2   -0.02    0.33
  -2  -6  -2    0.74    0.44
   2   6   2    0.33    0.36
   2  -6   2    0.66    0.40
  -2   6  -2    0.52    0.17
   9  -3  -4    0.32    0.30
  -9  -3   4   -0.19    0.39
  -9   3   4   -0.12    0.39
   9  -3  -4   -0.15    0.22
   9  -3  -4   -0.47    0.43
   9   3  -4    0.19    0.32
  -9  -3   4   -0.69    0.46
  -9   3   4    0.15    0.35
   9   3  -4    0.27    0.26
   3  -3 -11    3.01    0.51
   3   3 -11    1.96    0.42
   3  -3 -11    2.86    0.62
  -3   3  11    2.01    0.49
  -3  -3  11    2.00    0.47
   3  -3 -11    2.08    0.34
   3   3 -11    0.71    0.26
  -3   3  11    1.76    0.41
  -3   3  11    2.08    0.43
  -3  -3  11    2.33    0.33
   3  -3 -11    2.56    0.43
   3   3 -11    2.15    0.23
  -3  -3  11    1.66    0.37
  -1   6  -3    8.07    0.44
   1  -6   3    7.38    0.54
   1   6   3    7.71    0.62
  -1  -6  -3    7.50    0.52
   1  -6   3    7.33    0.42
   1  -6   3    8.16    0.62
  -1  -6  -3    8.27    0.45
   1  -6   3    7.94    0.52
  -1  -6  -3    8.57    0.67
  -1  -6  -3    7.47    0.68
   1   6   3    7.57    0.43
  -6  -5   3    2.19    0.41
  -6  -5   3    2.78    0.24
  -6  -5   3    2.10    0.25
   6   5  -3    2.83    0.47
  -6   5   3    2.23    0.32
   6   5  -3    2.87    0.31
  -6   5   3    2.65    0.44
  -6   5   3    2.75    0.42
   6  -5  -3    2.61    0.50
   6  -5  -3    2.02    0.49
  -6  -5   3    2.64    0.46
   6  -5  -3    2.90    0.43
   6  -5  -3    1.70    0.42
   0   4  10    0.54    0.23
   0  -4 -10    1.10    0.41
   0  -4  10    0.97    0.40
   0   4 -10    0.88    0.25
   0  -4 -10    0.74    0.20
   0  -4  10    0.96    0.21
   0  -4 -10    1.16    0.20
   0  -4  10    0.98    0.32
   0  -4  10    0.68    0.20
   0  -4  10    1.01    0.18
   0   4  10    0.27    0.43
   0  -4 -10    1.28    0.51
   0  -4  10    0.38    0.33
   3   2 -12    0.14    0.17
   3   2 -12    0.44    0.29
  -3   2  12   -0.45    0.35
  -3  -2  12    0.34    0.39
  -3  -2  12    0.14    0.36
   3   2 -12    0.34    0.46
  -3   2  12    0.14    0.35
   3  -2 -12    0.93    0.41
  -3  -2  12    0.28    0.29
   3  -2 -12    0.38    0.26
  -3   2  12   -0.22    0.41
   6  -1 -11   17.34    1.03
  -6   1  11   16.09    0.82
  -6  -1  11   15.93    0.86
   6   1 -11   15.82    0.92
   6   1 -11   13.97    0.87
  -6  -1  11   15.76    0.97
  -6   1  11   15.66    0.92
   6   1 -11   14.85    0.74
  -6   1  11   15.12    0.86
   6  -1 -11   15.52    0.81
  -6   1  11   15.54    0.94
   6   1 -11   16.58    1.00
   6  -1 -11   15.99    1.00
  -6  -1  11   13.02    0.82
  -6  -1  11   15.43    0.84
   7  -4   5   20.98    1.04
  -7   4  -5   20.48    1.07
   7  -4   5   21.16    1.17
  -7  -4  -5   19.37    1.01
   7   4   5   19.83    0.97
   7  -4   5   23.62    1.17
  -7  -4  -5   20.65    0.95
  -7  -4  -5   21.47    1.15
  -7   4  -5   22.10    1.03
  -7   4  -5   21.69    1.13
   7   4   5   19.64    1.14
  -7  -4  -5   22.50    1.16
   7  -4   5   21.46    1.15
  -8   4   3    5.01    0.52
   8  -4  -3    5.49    0.50
  -8   4   3    4.64    0.51
   8  -4  -3    4.49    0.57
   8  -4  -3    5.39    0.62
   8  -4  -3    5.00    0.50
  -8  -4   3    4.57    0.55
   8   4  -3    5.59    0.50
  -8  -4   3    5.23    0.39
   8   4  -3    4.92    0.53
  -8   4   3    5.56    0.63
  -8  -4   3    5.78    0.60
  -3   5   7    0.49    0.35
   3  -5  -7    0.74    0.36
   3  -5  -7    0.49    0.48
  -3  -5   7    0.32    0.30
  -3  -5   7    0.61    0.15
  -3   5   7    0.44    0.35
  -3  -5   7    0.40    0.11
  -3  -5   7    0.50    0.24
   3  -5  -7    0.66    0.36
  -3  -5   7    0.37    0.16
  -5   3  10    6.12    0.39
   5  -3 -10    6.69    0.61
  -5   3  10    6.05    0.48
   5  -3 -10    4.63    0.46
   5  -3 -10    5.76    0.52
  -5  -3  10    6.35    0.45
  -5  -3  10    5.75    0.51
  -5   3  10    6.52    0.57
   5   3 -10    6.38    0.58
  -5  -3  10    6.12    0.55
   5  -3 -10    6.69    0.69
  -5  -3  10    6.52    0.57
   5   3 -10    6.07    0.35
   5   3 -10    6.26    0.52
   5   3 -10    6.33    0.38
  -1   0 -13   24.61    1.22
  -1   0 -13   28.31    1.48
  -1   0 -13   26.99    1.27
   1   0  13   24.61    1.16
   1   0  13   25.31    1.24
  -1   0 -13   25.49    1.32
  -1  -4  10   13.45    0.79
   1  -4 -10   12.08    0.76
  -1  -4  10   16.10    0.80
  -1  -4  10   14.98    0.91
  -1  -4  10   14.97    0.70
  -1  -4  10   14.63    0.91
   1  -4 -10   15.10    1.00
   1   4 -10   14.39    0.78
  -1   4  10   16.25    0.85
   1  -4 -10   13.56    0.69
  -8  -1   9    0.38    0.24
  -8   1   9    0.58    0.33
   8  -1  -9    0.47    0.27
   8   1  -9   -0.16    0.40
  -8   1   9    0.29    0.49
  -8   1   9    0.42    0.30
   8  -1  -9    0.28    0.35
  -8  -1   9    0.50    0.52
   8  -1  -9    0.26    0.41
   8   1  -9    0.45    0.22
   8  -1  -9    0.37    0.35
   8   1  -9    0.59    0.38
   8   1  -9    0.80    0.38
  -8  -1   9    0.19    0.35
  -4  -4   9   23.07    1.20
  -4   4   9   23.13    1.17
  -4  -4   9   23.19    1.08
   4   4  -9   24.02    1.21
   4  -4  -9   25.91    1.38
   4  -4  -9   22.64    1.14
   4  -4  -9   24.92    1.24
  -4   4   9   24.41    1.27
  -4  -4   9   23.59    1.22
  -4   0 -12   10.31    0.62
  -4   0 -12    8.88    0.59
  -4   0 -12    8.89    0.66
   4   0  12    9.75    0.66
  -4   0 -12    9.28    0.63
   4   0  12    9.29    0.77
  -4   0 -12    9.99    0.76
   4   0  12    8.13    0.51
   2   0 -13   -0.12    0.18
  -2   0  13   -0.12    0.36
   2   0 -13   -0.09    0.25
   2   0 -13    0.11    0.35
  -2   0  13   -0.24    0.30
  -2   0  13   -0.50    0.40
   2   0 -13   -0.62    0.46
   2   0 -13    0.15    0.23
   4   5   6    2.08    0.50
  -4   5  -6    2.55    0.28
   4  -5   6    2.04    0.32
  -4   5  -6    1.63    0.27
   4  -5   6    1.76    0.39
  -4  -5  -6    2.04    0.35
   4   5   6    2.06    0.20
  -4  -5  -6    1.73    0.51
   4  -5   6    2.63    0.42
   0   1 -13    4.16    0.60
   0   1  13    2.85    0.41
   0  -1 -13    3.29    0.36
   0  -1 -13    2.28    0.33
   0   1 -13    3.39    0.36
   0  -1 -13    2.46    0.24
   0   1 -13    3.18    0.30
   0  -1  13    1.85    0.45
   0  -1  13    3.10    0.44
   0  -1 -13    3.33    0.50
   0   1 -13    3.10    0.43
   0  -1  13    2.60    0.36
   0   1  13    3.30    0.40
   0   1  13    3.88    0.60
   0  -1 -13    3.33    0.65
   1   1 -13   23.46    1.10
   1   1 -13   22.67    1.18
   1  -1 -13   21.43    1.03
   1  -1 -13   23.41    1.14
  -1  -1  13   24.34    1.21
   1   1 -13   22.89    1.24
   1  -1 -13   20.79    1.15
  -1  -1  13   21.48    1.20
  -1   1  13   23.12    1.17
  -1   1  13   23.29    1.27
  -1  -1  13   22.48    1.17
   1  -1 -13   20.69    1.13
  -1   1  13   23.95    1.21
   1  -1 -13   20.84    1.00
   1   1 -13   20.85    1.05
  -3  -6   0    3.72    0.37
   3   6   0    3.99    0.49
  -3   6   0    3.99    0.33
   3  -6   0    3.96    0.54
  -3  -6   0    2.99    0.50
  -3  -6   0    4.32    0.42
   3  -6   0    4.05    0.45
   3  -6   0    4.06    0.50
  -3   6   0    4.26    0.41
   3  -6   0    3.91    0.49
   9   0   7    7.96    0.63
  -9   0  -7    8.78    0.60
   9   0   7    8.01    0.58
  -9   0  -7    8.23    0.57
  -9   0  -7    8.80    0.65
   9   0   7    8.58    0.64
  -9   0  -7    8.77    0.69
  -1  -4 -10    3.19    0.52
   1   4  10    3.68    0.53
  -1  -4 -10    4.03    0.50
   1  -4  10    3.09    0.41
  -1   4 -10    2.94    0.34
   1  -4  10    3.73    0.37
   1  -4  10    2.56    0.42
  -1  -4 -10    3.28    0.35
   1   4  10    3.39    0.34
   1  -4  10    3.61    0.54
   1  -4  10    3.14    0.34
  -3  -6   1    2.07    0.28
   3  -6  -1    1.92    0.45
  -3  -6   1    1.47    0.44
   3  -6  -1    1.68    0.36
   3  -6  -1    1.61    0.32
   3   6  -1    1.92    0.36
   3   6  -1    1.60    0.17
  -3   6   1    2.05    0.32
   3  -6  -1    2.33    0.46
  -3  -6   1    1.40    0.30
  -5   0  12   -0.24    0.32
  -5   0  12    0.34    0.41
  -5   0  12   -0.24    0.36
  -5   0  12   -0.07    0.15
   5   0 -12   -0.19    0.41
   5   0 -12    0.37    0.49
   5   0 -12    0.32    0.36
   8  -3   6    0.07    0.33
  -8  -3  -6    0.03    0.34
   8   3   6    0.24    0.47
  -8  -3  -6   -0.23    0.39
   8   3   6    0.10    0.30
   8  -3   6   -0.16    0.45
  -8   3  -6   -0.05    0.20
   8  -3   6    0.20    0.35
  -8   3  -6   -0.03    0.33
  -8  -3  -6    0.28    0.14
  -8  -3  -6   -0.08    0.39
  -8   3  -6   -0.13    0.41
  -8  -3  -6    0.16    0.29
  -7   4   6    0.20    0.41
   7   4  -6    0.49    0.29
  -7   4   6   -0.10    0.25
   7  -4  -6   -0.34    0.39
  -7   4   6    0.22    0.29
  -7  -4   6    0.13    0.17
   7  -4  -6    0.47    0.33
  -7   4   6    0.10    0.40
  -7  -4   6   -0.34    0.36
   7  -4  -6   -0.03    0.33
  -7  -4   6    0.44    0.37
   7   4  -6    0.18    0.28
   7   4  -6    0.60    0.25
  -2  -6   3   -0.17    0.35
   2  -6  -3    0.11    0.43
  -2   6   3    0.27    0.34
  -2  -6   3    0.24    0.22
   2   6  -3   -0.04    0.12
   2  -6  -3   -0.07    0.32
  -2  -6   3    0.29    0.23
   2  -6  -3    0.24    0.26
  -2  -6   3    0.26    0.15
   2  -6  -3    0.25    0.37
   6  -5   3    0.77    0.41
  -6   5  -3    1.34    0.34
  -6  -5  -3    0.97    0.18
   6   5   3    0.54    0.40
  -6   5  -3    1.31    0.32
  -6  -5  -3    0.87    0.40
   6  -5   3    1.09    0.28
  -6  -5  -3    0.79    0.42
   6  -5   3    1.82    0.44
  -6  -5  -3    0.24    0.36
   6  -5   3    1.09    0.21
   3  -6   1    2.26    0.45
   3   6   1    1.99    0.40
  -3  -6  -1    1.93    0.45
   3  -6   1    2.71    0.43
  -3   6  -1    2.84    0.26
  -3  -6  -1    2.75    0.36
  -3  -6  -1    2.44    0.28
  -3   6  -1    3.03    0.33
   3  -6   1    2.45    0.43
   3  -6   1    2.59    0.38
  -2  -4  10   17.17    0.97
  -2  -4  10   17.21    0.98
  -2   4  10   15.43    0.91
  -2  -4  10   16.23    0.92
  -2  -4  10   17.47    0.87
  -2  -4  10   16.02    0.93
  -2   4  10   14.60    0.92
   2  -4 -10   13.65    0.70
   2  -4 -10   14.73    0.82
   2  -4 -10   16.64    1.02
  -2   4  10   17.02    0.91
  -2  -4  10   15.30    0.70
   9   0  -8   -0.01    0.22
  -9   0   8   -0.04    0.36
   9   0  -8   -0.10    0.30
  -9   0   8   -0.23    0.28
  -9   0   8   -0.22    0.41
   9   0  -8    0.37    0.37
   0   5   8    1.13    0.46
   0  -5  -8    1.34    0.48
   0  -5   8    1.50    0.31
   0   5   8    1.27    0.22
   0  -5  -8    1.32    0.45
   0  -5   8    1.26    0.20
   0  -5   8    1.63    0.31
   0   5   8    1.13    0.36
   0  -5   8    1.51    0.38
   0  -5   8    1.66    0.25
   5  -5   5    2.32    0.32
  -5  -5  -5    2.01    0.35
   5  -5   5    1.81    0.44
   5  -5   5    1.31    0.34
   5   5   5    1.68    0.14
  -5   5  -5    2.01    0.33
   5  -5   5    2.24    0.40
  -5  -5  -5    1.61    0.47
  -5   5  -5    1.77    0.28
   5   5   5    1.63    0.42
   3  -5   7    1.48    0.33
   3   5   7    1.84    0.49
  -3  -5  -7    1.83    0.56
   3  -5   7    1.21    0.36
  -3  -5  -7    1.28    0.28
   3  -5   7    1.15    0.30
  -3   5  -7    1.15    0.20
  -3   5  -7    1.39    0.17
  -3  -5  -7    1.47    0.29
   3  -5   7    1.01    0.17
   3   5   7    1.32    0.19
   5  -4   8    2.00    0.26
  -5   4  -8    2.24    0.27
  -5   4  -8    2.80    0.42
   5  -4   8    2.12    0.44
  -5   4  -8    2.83    0.30
  -5  -4  -8    1.63    0.25
   5  -4   8    1.90    0.40
   5   4   8    1.88    0.45
  -5  -4  -8    2.31    0.51
   5  -4   8    2.66    0.42
   5   4   8    2.04    0.19
  -5  -4  -8    2.34    0.51
  -2   6  -3    0.61    0.20
   2  -6   3    0.25    0.29
  -2  -6  -3    1.07    0.38
  -2  -6  -3    0.86    0.25
   2   6   3    0.53    0.38
   2   6   3    0.88    0.17
  -2  -6  -3    0.10    0.42
   2  -6   3    0.67    0.29
  -2  -6  -3    0.50    0.22
   2  -6   3    0.40    0.16
   2  -6   3    0.19    0.32
   2  -6   3    0.34    0.35
  10   2  -4    7.13    0.59
  10  -2  -4    6.56    0.43
  10   2  -4    7.11    0.49
  10  -2  -4    5.63    0.66
 -10  -2   4    7.78    0.48
 -10   2   4    7.27    0.60
 -10  -2   4    7.41    0.68
 -10   2   4    7.00    0.53
 -10  -2   4    6.79    0.62
  10   2  -4    7.14    0.56
 -10   2  -3   16.53    0.97
  10  -2   3   15.93    0.93
  10  -2   3   18.18    0.95
 -10  -2  -3   17.66    0.90
  10   2   3   18.44    1.00
  10   2   3   17.91    1.01
 -10  -2  -3   15.67    0.94
  10  -2   3   15.57    0.97
 -10   2  -3   16.96    0.83
 -10  -2  -3   16.88    0.95
  10   2   3   14.99    0.84
   1  -5  -8    1.23    0.55
  -1  -5   8    0.39    0.17
  -1  -5   8    1.28    0.26
  -1  -5   8    0.78    0.22
  -1  -5   8    0.66    0.37
  -1   5   8    0.61    0.41
  -1   5   8    0.37    0.43
  -1  -5   8    0.93    0.18
  -1   5   8    0.78    0.25
  -1  -5   8    0.66    0.31
   1  -5  -8    0.08    0.43
  -1  -1 -13    0.03    0.32
   1   1  13   -0.06    0.21
  -1   1 -13    0.32    0.47
  -1  -1 -13   -0.07    0.27
  -1   1 -13   -0.06    0.18
   1  -1  13   -0.10    0.18
  -1  -1 -13    0.04    0.33
   1   1  13    0.13    0.48
  -1  -1 -13    0.33    0.53
   1  -1  13    0.48    0.47
  -1   1 -13   -0.04    0.31
   1  -1  13   -0.24    0.33
   1   1  13   -0.60    0.37
  10   0  -6    3.23    0.45
 -10   0   6    2.80    0.60
  10   0  -6    3.12    0.49
  10   0  -6    1.76    0.20
  10   0  -6    3.16    0.49
  10   0  -6    1.69    0.20
 -10   0   6    4.07    0.54
 -10   0   6    1.96    0.30
 -10   0  -5   -0.03    0.13
  10   0   5    0.05    0.32
 -10   0  -5    0.20    0.41
  10   0   5    0.16    0.33
 -10   0  -5    0.05    0.24
   8  -4   3    9.04    0.54
  -8   4  -3    8.96    0.66
   8  -4   3    7.94    0.50
   8   4   3    9.65    0.73
  -8  -4  -3    9.27    0.65
   8  -4   3    8.70    0.69
  -8   4  -3    8.82    0.66
  -8  -4  -3    8.73    0.61
   8  -4   3    8.23    0.66
  -6  -2 -10    5.25    0.52
  -6   2 -10    3.86    0.41
  -6  -2 -10    4.54    0.54
   6  -2  10    4.19    0.58
  -6  -2 -10    4.26    0.47
  -6   2 -10    5.24    0.63
   6   2  10    3.22    0.52
  -6   2 -10    5.52    0.40
  -6  -2 -10    4.40    0.38
   6   2  10    3.94    0.39
  -6  -2 -10    4.65    0.49
   6  -2  10    4.79    0.47
  -6   2 -10    5.41    0.40
  -6   2 -10    4.51    0.55
   6  -2  10    4.33    0.49
   0  -6   4    7.62    0.50
   0  -6  -4    8.39    0.69
   0   6  -4    8.27    0.43
   0  -6  -4    7.90    0.56
   0   6   4    7.71    0.62
   0  -6   4    7.00    0.59
   0  -6   4    6.48    0.39
   0  -6  -4    7.09    0.43
   0  -6  -4    7.22    0.69
   0   6   4    7.94    0.46
   0  -6   4    7.15    0.45
  -4   1 -12    2.75    0.49
   4  -1  12    2.69    0.57
  -4   1 -12    2.02    0.45
   4   1  12    2.51    0.50
   4   1  12    2.81    0.22
  -4  -1 -12    3.23    0.43
  -4   1 -12    2.80    0.40
  -4   1 -12    2.45    0.37
   4   1  12    3.18    0.45
   4  -1  12    3.27    0.42
  -4  -1 -12    3.48    0.42
  -4   1 -12    3.36    0.33
  -4  -1 -12    2.41    0.41
   4  -1  12    2.65    0.33
   4   1  12    2.67    0.29
  -2  -1  13    4.62    0.49
  -2   1  13    4.74    0.50
   2  -1 -13    4.97    0.45
   2   1 -13    4.81    0.54
  -2   1  13    4.55    0.54
  -2  -1  13    4.27    0.56
  -2   1  13    5.28    0.57
   2  -1 -13    4.72    0.56
   2  -1 -13    5.07    0.59
   2   1 -13    5.05    0.41
   2   1 -13    5.34    0.66
   2   1 -13    4.94    0.50
  -2  -1  13    5.76    0.56
   2  -1 -13    4.03    0.39
  -7  -2  -9    1.63    0.20
  -7  -2  -9    1.30    0.38
  -7   2  -9    1.33    0.31
  -7  -2  -9    0.97    0.34
   7  -2   9    1.74    0.46
  -7  -2  -9    1.71    0.37
  -7  -2  -9    1.67    0.38
   7  -2   9    1.30    0.28
   7  -2   9    0.72    0.41
  -7   2  -9    1.62    0.45
   7   2   9    1.11    0.32
  11   0  -1    7.52    0.60
  11   0  -1    6.24    0.46
 -11   0   1    8.09    0.71
 -11   0   1    7.63    0.47
 -11   0   0   -0.08    0.39
  11   0   0    0.24    0.39
 -11   0   0    0.04    0.18
 -11   0   0    0.59    0.53
 -11   0   0    0.07    0.19
  11   0   0    0.04    0.38
  11   0   0    0.02    0.30
  -8  -3   7   -0.06    0.38
   8   3  -7    0.26    0.30
   8  -3  -7   -0.07    0.36
  -8  -3   7    0.51    0.46
  -8   3   7    1.00    0.40
   8  -3  -7    0.98    0.44
   8   3  -7    0.27    0.36
   8   3  -7    0.21    0.18
  -8   3   7    0.68    0.32
   8  -3  -7    0.39    0.27
  -8  -3   7    0.52    0.20
  -8   3   7    0.54    0.34
   8   3  -7    0.05    0.28
   8  -3  -7    0.76    0.42
   3  -6  -2    1.23    0.45
  -3  -6   2    0.92    0.23
  -3   6   2    1.15    0.30
   3   6  -2    1.07    0.29
  -3  -6   2    0.68    0.38
  -3  -6   2    0.92    0.21
  -3   6   2    1.12    0.30
   3  -6  -2    0.81    0.37
   3  -6  -2    0.80    0.44
   3   6  -2    1.22    0.16
   3  -6  -2    1.20    0.32
   6   4   7    0.11    0.20
  -6  -4  -7    0.39    0.16
   6   4   7    0.57    0.13
  -6  -4  -7    0.68    0.48
   6  -4   7    0.53    0.33
   6  -4   7    0.57    0.40
   6  -4   7    0.45    0.37
   6  -4   7    0.06    0.28
  -6   4  -7    0.82    0.34
   6   4   7    0.87    0.46
  -6  -4  -7    0.38    0.33
  -6  -4  -7    0.66    0.35
  -6   4  -7    0.22    0.28
  -6   4  -7    0.51    0.21
  -2   0 -13   -0.31    0.33
  -2   0 -13   -0.04    0.29
   2   0  13   -0.05    0.45
   2   0  13    0.01    0.14
  -2   0 -13   -0.03    0.46
   2   0  13   -0.22    0.36
  -2   0 -13   -0.01    0.24
  -3  -3 -11    6.42    0.51
   3  -3  11    6.81    0.46
  -3   3 -11    7.29    0.40
  -3  -3 -11    6.71    0.64
  -3   3 -11    8.06    0.55
  -3   3 -11    7.45    0.54
  -3  -3 -11    7.63    0.55
   3  -3  11    7.82    0.58
  -3  -3 -11    8.23    0.61
   3   3  11    7.32    0.42
   3   3  11    6.16    0.65
   3  -3  11    8.15    0.67
   3   3  11    7.87    0.62
   1  -6  -4    6.96    0.68
  -1  -6   4    7.62    0.43
  -1  -6   4    7.99    0.45
   1   6  -4    7.44    0.40
  -1   6   4    7.74    0.63
  -1   6   4    5.92    0.34
  -1  -6   4    7.36    0.60
   1  -6  -4    8.59    0.50
   1  -6  -4    6.77    0.57
   1  -6  -4    7.75    0.57
  -1  -6   4    8.19    0.51
  -1  -6   4    7.40    0.45
   9  -2   6    0.31    0.35
  -9  -2  -6    0.54    0.30
  -9   2  -6    0.38    0.38
  -9  -2  -6   -0.06    0.30
   9  -2   6    0.33    0.31
  -9  -2  -6    0.63    0.31
  -9   2  -6    0.05    0.44
   9  -2   6   -0.10    0.45
   9   2   6   -0.12    0.27
   9   2   6    0.32    0.38
  -9  -2  -6    0.01    0.12
   8   4  -4    0.35    0.35
  -8   4   4    0.76    0.38
   8  -4  -4    0.33    0.28
   8  -4  -4    0.68    0.41
   8   4  -4   -0.03    0.30
  -8  -4   4    0.90    0.43
  -8  -4   4    1.23    0.43
   8  -4  -4   -0.24    0.46
  -8   4   4    0.46    0.34
   8  -4  -4    0.71    0.44
   8   4  -4    0.51    0.29
  -8  -4   4    0.23    0.16
   6  -5  -4   15.40    0.93
   6  -5  -4   13.31    0.78
  -6   5   4   13.28    0.82
  -6  -5   4   15.30    0.86
   6   5  -4   16.63    1.08
  -6  -5   4   15.46    0.70
   6  -5  -4   14.37    0.81
  -6   5   4   13.70    0.70
  -6  -5   4   15.22    0.87
   6  -5  -4   14.10    0.86
   1  -5   8    1.79    0.38
   1   5   8    2.65    0.29
   1   5   8    2.26    0.46
  -1  -5  -8    2.31    0.51
   1  -5   8    2.47    0.26
  -1  -5  -8    2.59    0.45
   1   5   8    3.30    0.57
   1  -5   8    2.34    0.37
   1  -5   8    2.09    0.35
  -1  -5  -8    3.19    0.45
   1  -5   8    2.39    0.33
   9  -3   4    0.46    0.28
  -9  -3  -4    0.13    0.10
  -9   3  -4    0.44    0.38
  -9   3  -4    1.16    0.45
   9   3   4   -0.01    0.43
  -9  -3  -4   -0.19    0.34
   9  -3   4   -0.18    0.37
   9  -3   4   -0.30    0.45
  -9  -3  -4   -0.27    0.46
   9   3   4    0.10    0.33
  -9  -3  -4    0.01    0.32
   9  -1   7    1.78    0.36
  -9  -1  -7    1.30    0.36
  -9   1  -7    1.88    0.43
  -9   1  -7    2.25    0.37
  -9  -1  -7    1.50    0.51
   9   1   7    2.87    0.42
  -9  -1  -7    2.18    0.35
  -9  -1  -7    2.11    0.35
   9  -1   7    3.05    0.52
  -9   1  -7    2.26    0.46
  -9   1  -7    2.91    0.36
  -9  -1  -7    2.22    0.19
   9  -1   7    1.78    0.41
   3   0 -13    2.83    0.48
   3   0 -13    2.12    0.31
  -3   0  13    2.65    0.41
  -3   0  13    1.82    0.42
  -3   0  13    2.72    0.50
   3   0 -13    1.85    0.33
   3   0 -13    1.30    0.52
  -3  -6  -2    9.46    0.56
   3  -6   2    9.55    0.63
   3  -6   2    8.39    0.59
  -3  -6  -2    9.72    0.66
  -3  -6  -2    8.13    0.66
   3   6   2    7.46    0.61
  -3   6  -2    9.17    0.49
   3  -6   2    8.63    0.64
   3   6   2    8.64    0.44
  -3   6  -2    8.82    0.53
  -3  -6  -2    9.32    0.54
   3  -6   2    9.17    0.50
   3  -6   2    9.18    0.66
   1   6   4    0.12    0.18
   1  -6   4    0.11    0.31
   1  -6   4   -0.43    0.26
   1   6   4    0.96    0.40
  -1   6  -4    0.33    0.15
  -1  -6  -4   -0.14    0.43
  -1  -6  -4   -0.37    0.45
   1  -6   4   -0.08    0.15
   1  -6   4   -0.20    0.25
  -1  -6  -4   -0.10    0.15
  -1  -6  -4   -0.06    0.33
  -1  -6  -4    0.03    0.20
   3   2  12    0.10    0.14
  -3  -2 -12   -0.26    0.32
  -3   2 -12    0.23    0.34
   3  -2  12   -0.04    0.28
  -3  -2 -12   -0.38    0.34
   3   2  12   -0.07    0.41
  -3   2 -12    0.34    0.17
   3  -2  12    0.35    0.23
  -3   2 -12    0.38    0.37
  -3  -2 -12    0.84    0.49
   3  -2  12    0.27    0.46
   3   2  12    1.38    0.51
  -3  -2 -12   -0.12    0.30
  -7   0 -10   -0.09    0.12
   7   0  10   -0.35    0.30
   7   0  10    0.17    0.42
  -7   0 -10    0.05    0.28
  -7   0 -10   -0.25    0.44
  -7   0 -10    0.14    0.29
  11   0  -2    0.03    0.26
  11   0  -2   -0.02    0.38
 -11   0   2   -0.22    0.38
 -11   0   2   -0.00    0.22
  -9  -2   7    2.74    0.49
   9   2  -7    2.85    0.27
  -9   2   7    2.19    0.43
   9  -2  -7    2.69    0.30
  -9   2   7    2.74    0.53
   9   2  -7    3.10    0.39
   9   2  -7    2.20    0.25
   9   2  -7    2.87    0.45
   9  -2  -7    3.38    0.50
  -9  -2   7    2.90    0.56
   9   2  -7    3.87    0.50
  -9   2   7    2.65    0.43
   9  -2  -7    2.33    0.48
   5  -1 -12    4.27    0.48
   5  -1 -12    6.24    0.72
  -5  -1  12    4.55    0.58
   5  -1 -12    4.52    0.54
  -5  -1  12    4.46    0.45
  -5   1  12    5.24    0.41
  -5  -1  12    4.72    0.38
  -5   1  12    5.80    0.63
   5   1 -12    5.27    0.63
   5   1 -12    4.92    0.54
   5  -1 -12    4.82    0.43
  -5  -1  12    4.18    0.51
  -5   1  12    4.27    0.54
  -5   1  12    4.49    0.48
   5   1 -12    5.24    0.58
  11   0   1   15.48    1.08
 -11   0  -1   17.39    1.15
 -11   0  -1   18.06    1.31
  11   0   1   18.34    1.28
 -11   0  -1   18.27    1.32
 -11   0  -1   15.61    1.03
   9   3  -5    3.03    0.42
  -9  -3   5    3.28    0.51
  -9   3   5    1.90    0.35
   9  -3  -5    3.81    0.38
  -9   3   5    2.51    0.46
  -9  -3   5    2.61    0.52
   9   3  -5    2.36    0.32
   9  -3  -5    2.99    0.51
   9  -3  -5    2.94    0.43
  -9   3   5    3.09    0.45
  -6  -3  -9    3.61    0.32
   6  -3   9    4.06    0.44
  -6  -3  -9    4.17    0.44
   6  -3   9    3.98    0.49
  -6   3  -9    4.73    0.54
   6  -3   9    4.26    0.53
  -6  -3  -9    4.30    0.53
   6   3   9    4.20    0.40
   6  -3   9    4.87    0.56
  -6  -3  -9    5.52    0.63
  -6   3  -9    4.55    0.41
  -6  -3  -9    3.37    0.48
  -2  -4 -10    6.67    0.61
   2  -4  10    7.08    0.62
   2  -4  10    7.29    0.63
  -2  -4 -10    7.53    0.80
   2   4  10    8.95    0.63
  -2  -4 -10    6.79    0.61
   2   4  10    7.81    0.73
  -2   4 -10    7.87    0.60
   2  -4  10    7.32    0.56
   2  -4  10    7.56    0.71
  -2  -4 -10    7.49    0.61
  -2   4 -10    7.06    0.52
   2  -4  10    7.30    0.67
   4   4   9    0.47    0.16
   4  -4   9   -0.07    0.39
  -4   4  -9    0.26    0.27
  -4   4  -9    0.50    0.21
   4  -4   9    0.53    0.21
  -4  -4  -9    0.23    0.34
   4  -4   9    0.17    0.32
   4  -4   9    0.22    0.34
  -4  -4  -9   -0.30    0.43
   4   4   9    0.16    0.42
  -4  -4  -9    0.04    0.23
  -9  -1   8    0.89    0.55
  -9   1   8    0.63    0.38
   9   1  -8    0.57    0.39
   9  -1  -8    1.21    0.44
  -9  -1   8    1.14    0.41
   9   1  -8    0.48    0.42
   9  -1  -8    1.25    0.43
   9   1  -8    1.02    0.37
  -9   1   8    0.94    0.43
  -9   1   8    1.23    0.33
   9  -1  -8    1.24    0.27
   9   1  -8    0.87    0.19
  -2  -5   8   -0.25    0.26
  -2  -5   8    0.02    0.13
  -2  -5   8   -0.02    0.17
  -2  -5   8   -0.01    0.14
   2  -5  -8    0.25    0.35
  -2   5   8    0.13    0.31
  -2  -5   8   -0.04    0.21
  -2   5   8    0.39    0.42
   2  -5  -8   -0.02    0.50
   4   3 -11    1.15    0.19
  -4  -3  11    1.20    0.30
  -4   3  11    1.39    0.45
   4  -3 -11    1.26    0.32
   4   3 -11    0.81    0.31
  -4  -3  11    0.98    0.41
   4  -3 -11    1.66    0.43
  -4   3  11    1.32    0.41
  -4  -3  11    1.23    0.34
  -4   3  11    1.01    0.39
   4  -3 -11    1.03    0.37
   4  -3 -11    0.81    0.50
   4   3 -11    1.07    0.39
  -4  -3  11    1.02    0.25
   6   0  11   -0.29    0.27
  -6   0 -11    0.11    0.28
  -6   0 -11   -0.20    0.29
   6   0  11   -0.52    0.31
  -6   0 -11   -0.06    0.17
   6   0  11   -0.48    0.48
  -6   0 -11   -0.40    0.39
   4  -2 -12    0.35    0.29
  -4   2  12    0.47    0.37
   4   2 -12    0.73    0.35
   4   2 -12    0.46    0.41
   4   2 -12    0.41    0.20
  -4  -2  12    0.63    0.34
   4  -2 -12    0.06    0.43
  -4  -2  12    0.18    0.41
  -4  -2  12    0.50    0.30
  -4   2  12    0.51    0.34
  -4   2  12    0.28    0.40
   4   2 -12    0.12    0.32
   4  -2 -12    0.36    0.33
   4  -2 -12    0.47    0.41
  10   1  -6    8.59    0.60
 -10   1   6    8.04    0.79
  10  -1  -6    7.67    0.58
 -10   1   6    8.37    0.66
  10   1  -6    8.91    0.72
 -10  -1   6    8.73    0.66
  10  -1  -6    6.92    0.66
  10   1  -6    9.64    0.83
 -10   1   6    8.38    0.71
  10  -1  -6    8.83    0.63
  10   1  -6   10.11    0.70
  10  -1  -6    8.37    0.77
  10  -1  -6    8.91    0.75
 -10  -1   6    9.04    0.82
 -10  -1   6    8.44    0.75
  10   1   5    6.73    0.62
 -10   1  -5    7.27    0.57
  10  -1   5    5.50    0.56
  10  -1   5    5.78    0.60
  10  -1   5    5.63    0.56
 -10  -1  -5    6.68    0.65
 -10  -1  -5    6.95    0.59
  10   1   5    7.28    0.71
 -10   1  -5    5.59    0.60
 -10   1  -5    6.11    0.65
  10   1   5    6.72    0.62
   5   2  11    0.09    0.48
  -5   2 -11    0.58    0.36
  -5  -2 -11    0.30    0.23
  -5   2 -11    0.39    0.33
   5  -2  11    0.01    0.33
  -5  -2 -11    0.52    0.38
   5  -2  11   -0.06    0.29
  -5  -2 -11    0.33    0.29
  -5  -2 -11    0.37    0.46
   5   2  11    0.04    0.36
  -5   2 -11    0.21    0.16
   5   2  11    0.01    0.18
   5   2  11    0.25    0.11
   5  -2  11    0.20    0.45
  -5   5   6   11.86    0.80
   5  -5  -6   13.57    1.04
  -5  -5   6   12.83    0.94
   5  -5  -6   14.03    1.02
  -5  -5   6   12.11    0.93
  -5  -5   6   10.35    0.70
  -5  -5   6   10.90    0.70
  -5   5   6   12.32    0.94
   5  -5  -6   10.13    0.82
   5  -5  -6    9.76    0.79
  -4  -5   7    4.26    0.35
   4  -5  -7    4.09    0.50
  -4  -5   7    4.82    0.33
  -4  -5   7    4.54    0.52
  -4   5   7    3.96    0.45
  -4  -5   7    4.40    0.45
   4  -5  -7    4.31    0.51
  -4   5   7    4.27    0.49
  -4   5   7    4.48    0.52
   4  -5  -7    5.53    0.66
 -11   1   1   16.38    1.24
  11  -1  -1   15.96    1.17
 -11   1   1   13.75    0.94
  11  -1  -1   15.02    1.12
 -11  -1   1   13.83    0.91
  11  -1  -1   14.78    1.01
 -11  -1   1   14.15    0.94
  11   1  -1   15.24    1.10
  11  -1  -1   14.55    0.94
 -11   1   1   16.54    1.23
 -11  -1   1   16.53    1.22
 -11  -1   0   17.12    1.11
 -11   1   0   16.75    1.24
 -11  -1   0   16.75    1.09
 -11   1   0   16.95    1.12
  11   1   0   18.71    1.31
 -11   1   0   15.62    1.16
 -11  -1   0   17.21    1.28
  11  -1   0   16.97    1.22
  11   1   0   16.72    1.17
  11  -1   0   14.86    1.11
   7   3   8    0.50    0.48
  -7  -3  -8   -0.38    0.28
   7  -3   8   -0.02    0.27
  -7  -3  -8    0.21    0.43
  -7   3  -8   -0.40    0.22
  -7  -3  -8    0.12    0.36
  -7   3  -8   -0.21    0.29
  -7   3  -8   -0.06    0.37
   7  -3   8    0.25    0.44
  -7  -3  -8   -0.25    0.16
   7   3   8   -0.09    0.22
   7  -3   8   -0.03    0.36
  -3   4  10    0.36    0.37
  -3  -4  10    0.60    0.32
  -3  -4  10    0.22    0.30
  -3  -4  10    0.72    0.12
   3  -4 -10    1.62    0.33
  -3  -4  10    1.18    0.32
  -3  -4  10    0.32    0.25
   3  -4 -10    0.40    0.35
  -3   4  10    1.09    0.50
   3  -4 -10    1.42    0.50
  -3   4  10    1.14    0.37
   3  -4 -10    1.39    0.48
   2  -6  -4    1.24    0.44
  -2  -6   4    1.13    0.25
   2  -6  -4    1.37    0.28
  -2   6   4    1.57    0.41
  -2  -6   4    1.08    0.21
   2  -6  -4    0.98    0.45
   2   6  -4    1.54    0.18
   2  -6  -4    1.43    0.42
  -2  -6   4    1.45    0.19
  -2  -6   4    1.34    0.37
  -2  -6   4    1.41    0.18
  -5  -3 -10    2.22    0.44
  -5   3 -10    1.32    0.38
  -5   3 -10    1.71    0.32
   5   3  10    1.35    0.22
  -5  -3 -10    2.08    0.43
   5  -3  10    1.59    0.43
  -5  -3 -10    1.97    0.30
   5   3  10    1.77    0.18
  -5  -3 -10    1.61    0.44
   5  -3  10    1.31    0.40
   5  -3  10    1.66    0.31
  -8   0  -9    0.07    0.28
  -8   0  -9   -0.31    0.32
  -8   0  -9    0.67    0.40
   8   0   9   -0.00    0.35
   8   0   9    0.14    0.49
  -8   0  -9   -0.09    0.11
  -8   0  -9   -0.35    0.30
  -3  -6   3   -0.06    0.33
   3  -6  -3    0.36    0.42
  -3   6   3   -0.04    0.24
  -3  -6   3   -0.07    0.25
   3  -6  -3    0.60    0.28
  -3  -6   3    0.13    0.20
   3  -6  -3   -0.31    0.38
   3  -6  -3    0.47    0.46
   8  -2   8    6.89    0.62
  -8  -2  -8    7.00    0.64
   8   2   8    6.00    0.54
   8  -2   8    6.24    0.66
  -8  -2  -8    7.47    0.64
  -8   2  -8    6.52    0.54
  -8  -2  -8    7.36    0.50
  -8   2  -8    6.49    0.65
  -8  -2  -8    6.59    0.68
  -8  -2  -8    6.11    0.61
   8  -2   8    6.87    0.67
  -8   2  -8    7.11    0.72
   2   1  13   15.07    1.16
  -2   1 -13   14.56    0.98
   2   1  13   14.46    1.04
   2  -1  13   14.02    0.91
  -2   1 -13   14.60    1.12
   2  -1  13   12.27    0.97
   2   1  13   14.85    0.97
  -2   1 -13   14.10    1.12
  -2  -1 -13   15.47    1.07
  -2  -1 -13   13.18    0.96
  -2  -1 -13   14.10    1.05
   2  -1  13   15.60    1.09
  -2   1 -13   11.92    0.92
   7  -2 -10    0.06    0.26
  -7  -2  10    0.08    0.21
   7   2 -10   -0.11    0.15
  -7   2  10    0.04    0.25
  -7   2  10    0.11    0.31
   7  -2 -10    0.55    0.37
   7  -2 -10   -0.05    0.47
   7   2 -10   -0.34    0.34
   7   2 -10   -0.14    0.32
  -7  -2  10    0.27    0.45
  -7  -2  10    0.11    0.35
  -7   2  10   -0.09    0.38
   7  -2 -10    0.43    0.51
   7   2 -10    0.17    0.29
   6   5   4   -0.19    0.43
   6  -5   4   -0.16    0.35
  -6   5  -4    0.03    0.24
  -6   5  -4    0.32    0.29
   6  -5   4   -0.03    0.43
  -6  -5  -4   -0.26    0.36
  -6  -5  -4    0.45    0.41
   6  -5   4    0.07    0.23
   6  -5   4    0.70    0.28
  11   0  -3   21.52    1.46
  11   0  -3   22.89    1.43
 -11   0   3   21.76    1.41
  11   0  -3   22.85    1.59
 -11   0   3   20.57    1.45
   3  -1 -13    8.78    0.79
   3   1 -13    8.36    0.72
  -3   1  13    8.09    0.76
  -3  -1  13    6.71    0.63
  -3  -1  13    8.95    0.72
   3   1 -13    9.86    0.88
  -3   1  13    7.65    0.66
   3  -1 -13    6.49    0.56
   3   1 -13    9.13    0.77
   3  -1 -13    7.62    0.62
   3  -1 -13   10.34    0.93
   3   1 -13    9.00    0.66
  -3   1  13    9.51    0.80
  -3  -1  13    8.34    0.73
   2   5   8    2.79    0.47
  -2   5  -8    4.21    0.31
   2   5   8    4.27    0.35
   2  -5   8    4.29    0.45
   2  -5   8    4.12    0.48
  -2   5  -8    4.38    0.34
  -2  -5  -8    4.19    0.45
  -2   5  -8    4.37    0.30
  -2  -5  -8    4.39    0.56
   2  -5   8    4.31    0.49
   2   5   8    4.98    0.50
  -2  -5  -8    5.05    0.55
   2  -5   8    4.77    0.37
  -7   1 -10    0.77    0.39
  -7   1 -10    0.58    0.12
  -7  -1 -10    0.32    0.29
  -7  -1 -10    0.86    0.32
  -7  -1 -10    0.62    0.44
   7   1  10    0.67    0.50
  -7   1 -10    0.50    0.34
   7  -1  10    0.19    0.41
  -7  -1 -10    0.49    0.17
   7  -1  10    0.59    0.34
  -7  -1 -10    0.53    0.37
   7   1  10    0.76    0.31
  -7   1 -10    0.75    0.24
 -11   0  -2   -0.40    0.45
  11   0   2    0.29    0.29
 -11   0  -2   -0.15    0.17
  11   0   2   -0.08    0.30
 -11   0  -2    0.16    0.22
  11   0   2    0.14    0.46
 -11   0  -2   -0.27    0.49
   7  -5   0    4.83    0.54
  -7  -5   0    5.76    0.60
  -7  -5   0    5.14    0.38
  -7   5   0    3.96    0.44
   7  -5   0    3.56    0.41
   7  -5   0    4.57    0.50
   7  -5   0    6.39    0.50
  -7   5   0    4.88    0.56
   7  -5   0    5.15    0.55
   7   5   0    7.57    0.58
   7   5   0    4.23    0.51
  -7  -5   0    6.01    0.56
  -7  -5   0    6.21    0.56
  -6  -4   8   10.09    0.71
   6  -4  -8    9.91    0.77
   6   4  -8   10.20    0.73
  -6   4   8    8.82    0.63
   6  -4  -8    9.27    0.77
   6   4  -8    9.95    0.77
   6   4  -8   11.25    0.99
   6  -4  -8   10.69    0.92
  -6   4   8    9.54    0.80
   6   4  -8    8.10    0.68
  -6   4   8   10.35    0.87
   6  -4  -8   10.22    0.88
  -6  -4   8    9.73    0.82
  -6  -4   8    9.80    0.82
  11  -1  -2    1.78    0.41
  11   1  -2    1.83    0.39
 -11   1   2    1.54    0.29
 -11  -1   2    1.64    0.43
  11   1  -2    2.66    0.51
 -11  -1   2    1.65    0.27
  11  -1  -2    1.80    0.22
  11  -1  -2    1.78    0.29
  11   1  -2    2.17    0.35
 -11   1   2    1.55    0.43
   2  -6   4    1.59    0.22
   2   6   4    1.10    0.43
  -2  -6  -4    1.30    0.42
  -2  -6  -4    1.07    0.50
  -2  -6  -4    1.50    0.32
   2  -6   4    1.93    0.35
  -2   6  -4    1.70    0.23
   2   6   4    1.56    0.21
   2  -6   4    1.81    0.37
   2  -6   4    2.00    0.37
  -2  -6  -4    1.95    0.29
   7  -4   6    4.85    0.59
  -7  -4  -6    7.58    0.71
  -7  -4  -6    4.22    0.51
   7   4   6    5.49    0.48
  -7  -4  -6    5.51    0.42
  -7  -4  -6    4.93    0.53
   7  -4   6    4.46    0.55
  -7   4  -6    4.31    0.49
  -7  -4  -6    5.14    0.56
   7   4   6    4.58    0.60
   7  -4   6    5.59    0.54
  -7   4  -6    6.07    0.48
  -7   4  -6    4.90    0.52
   7  -5  -1    2.89    0.39
   7   5  -1    2.30    0.44
  -7   5   1    3.44    0.43
  -7  -5   1    2.25    0.37
   7   5  -1    2.94    0.31
  -7  -5   1    2.66    0.22
  -7   5   1    3.70    0.52
   7  -5  -1    2.49    0.44
   7  -5  -1    2.85    0.44
  -7  -5   1    3.27    0.48
   7  -5  -1    2.80    0.42
   7  -5  -1    2.31    0.27
  -7  -5   1    2.57    0.34
 -11  -1  -1    0.19    0.15
  11   1   1   -0.29    0.35
  11   1   1   -0.04    0.31
 -11   1  -1    0.35    0.22
 -11  -1  -1    0.15    0.18
 -11   1  -1   -0.31    0.21
 -11  -1  -1   -0.02    0.43
  11  -1   1    0.75    0.42
  11  -1   1    0.38    0.32
 -11  -1  -1    0.02    0.43
 -11   1  -1   -0.10    0.42
  11   1   1   -0.16    0.33
 -11   1  -1   -0.01    0.40
  -3  -6  -3    7.77    0.59
   3  -6   3    6.37    0.58
  -3  -6  -3    6.97    0.56
   3  -6   3    6.60    0.50
  -3  -6  -3    7.61    0.71
   3   6   3    7.86    0.53
   3  -6   3    7.58    0.67
  -3   6  -3    7.57    0.56
  -3   6  -3    7.62    0.55
   3  -6   3    7.07    0.62
   3  -6   3    8.85    0.71
  -3  -6  -3    6.25    0.70
  -4  -6   0    1.72    0.24
   4  -6   0    1.53    0.42
  -4   6   0    1.53    0.33
   4  -6   0    1.68    0.44
   4  -6   0    1.77    0.38
  -4  -6   0    1.65    0.29
  -4   6   0    1.63    0.22
   4   6   0    0.87    0.34
  -4  -6   0    1.04    0.40
   4  -6   0    2.22    0.42
 -10   2   5    0.38    0.37
  10   2  -5    0.32    0.22
 -10  -2   5    0.27    0.46
  10  -2  -5    0.16    0.48
 -10   2   5   -0.04    0.35
 -10  -2   5    0.32    0.47
 -10  -2   5    0.38    0.25
  10  -2  -5    0.67    0.23
  10  -2  -5   -0.03    0.45
 -10   2   5   -0.26    0.49
  10   2  -5    0.38    0.32
 -10   2  -4    0.73    0.20
 -10  -2  -4    0.50    0.30
  10   2   4    0.85    0.39
 -10  -2  -4    0.90    0.54
  10  -2   4    1.52    0.53
  10  -2   4    1.05    0.32
  10   2   4    0.67    0.39
 -10   2  -4    1.07    0.47
 -10  -2  -4    1.19    0.40
 -10   2  -4    1.07    0.41
  10  -2   4    1.01    0.37
  10   2   4    0.94    0.37
   0   3  12   10.77    0.87
   0  -3  12    9.62    0.83
   0   3  12    7.41    0.70
   0  -3  12    9.12    0.60
   0   3  12    9.73    0.72
   0  -3  12    8.74    0.74
   0   3 -12    9.73    0.66
   0  -3 -12    9.44    0.65
   0  -3 -12    9.20    0.67
   0   3 -12    8.85    0.75
   0  -3 -12    9.49    0.89
   0  -3 -12   10.33    0.80
   0  -3 -12    8.38    0.73
   0  -3  12    9.80    0.72
   8   4   4    3.69    0.56
  -8   4  -4    2.98    0.47
  -8  -4  -4    3.14    0.26
   8  -4   4    3.15    0.36
  -8  -4  -4    3.14    0.44
  -8  -4  -4    4.00    0.55
   8  -4   4    2.87    0.39
   8  -4   4    3.46    0.49
  -8   4  -4    3.15    0.47
   8  -4   4    2.49    0.46
   8   4   4    4.09    0.42
   1  -3 -12    4.74    0.57
  -1  -3  12    5.02    0.49
  -1   3  12    5.62    0.69
  -1  -3  12    5.26    0.47
  -1  -3  12    4.94    0.57
  -1   3  12    4.05    0.39
   1   3 -12    5.25    0.55
   1  -3 -12    5.89    0.68
   1  -3 -12    4.77    0.39
   1   3 -12    4.62    0.36
  -1   3  12    4.63    0.59
   5  -4  -9    1.12    0.37
  -5   4   9    0.73    0.19
   5   4  -9    1.21    0.24
  -5   4   9    1.18    0.40
  -5   4   9    0.61    0.41
   5  -4  -9    1.04    0.39
  -5  -4   9    0.80    0.26
   5   4  -9    0.99    0.32
  -5  -4   9    1.01    0.40
   5  -4  -9    1.34    0.48
   5   4  -9    1.11    0.46
  -5  -4   9    1.13    0.42
   4  -6  -1    9.15    0.80
   4  -6  -1    8.41    0.75
  -4  -6   1   10.79    0.80
   4   6  -1    9.64    0.79
  -4  -6   1    9.52    0.66
  -4   6   1    8.08    0.64
   4   6  -1    9.01    0.59
  -4  -6   1    9.44    0.81
  -4   6   1   10.02    0.69
   4  -6  -1    8.39    0.67
  -6   1 -11    0.14    0.35
   6  -1  11    0.80    0.50
   6   1  11    0.89    0.52
   6   1  11   -0.10    0.25
  -6  -1 -11    0.34    0.30
  -6  -1 -11    0.27    0.43
  -6  -1 -11    0.30    0.21
  -6   1 -11    0.28    0.22
   6   1  11   -0.00    0.32
  -6  -1 -11    0.65    0.30
   6  -1  11    0.59    0.31
  -6   1 -11    0.58    0.42
  -6  -1 -11    0.29    0.39
  -6   1 -11    0.43    0.19
   6  -1  11    0.20    0.31
  -6  -2  11    1.19    0.32
  -6   2  11    1.54    0.43
   6   2 -11    0.83    0.35
   6  -2 -11    0.80    0.44
   6  -2 -11    1.10    0.50
  -6   2  11    0.45    0.33
   6  -2 -11    1.05    0.31
  -6  -2  11    1.08    0.29
  -6   2  11    0.85    0.20
  -6  -2  11    0.54    0.48
  -6  -2  11    0.92    0.29
   6  -2 -11    0.70    0.33
   6   2 -11    0.74    0.41
   6   2 -11    0.77    0.32
  -6   2  11    0.50    0.35
   7  -5   1    8.04    0.64
   7   5   1    9.55    0.69
  -7  -5  -1    8.43    0.71
   7  -5   1    8.16    0.71
  -7  -5  -1    9.24    0.77
  -7   5  -1    9.51    0.75
   7  -5   1    8.74    0.70
  -7  -5  -1    8.64    0.58
  -7  -5  -1    9.50    0.77
   7  -5   1    8.31    0.60
  -7   5  -1    9.27    0.78
   7  -5   1    8.95    0.79
   7   5   1    6.34    0.67
   7   0 -11    0.59    0.37
  -7   0  11    0.14    0.28
   7   0 -11    0.41    0.38
  -7   0  11    0.15    0.27
   7   0 -11    0.52    0.21
  -7   0  11    0.16    0.34
   7   0 -11    0.73    0.45
  -7   0  11    0.16    0.42
  -8   2   9    1.49    0.37
   8  -2  -9    1.60    0.28
   8   2  -9    0.87    0.18
   8   2  -9    1.64    0.36
   8  -2  -9    0.73    0.35
  -8  -2   9    1.42    0.43
   8   2  -9    1.54    0.37
   8   2  -9    1.01    0.37
   8  -2  -9    1.29    0.43
  -8  -2   9    0.62    0.43
  -8   2   9    1.48    0.37
  -8  -2   9    0.80    0.28
  -8   2   9    1.23    0.43
  -8   2   9    1.49    0.35
   4  -6   1    0.23    0.30
  -4   6  -1    0.49    0.23
  -4  -6  -1    0.03    0.22
   4  -6   1   -0.11    0.39
   4  -6   1    0.33    0.18
   4  -6   1    0.50    0.32
   4  -6   1    0.22    0.35
  -4   6  -1    0.20    0.17
  -4  -6  -1    0.52    0.27
  -4  -6  -1    0.07    0.39
   4   6   1    0.85    0.37
  -8   0  10   14.70    1.03
   8   0 -10   17.57    1.15
  -8   0  10   15.66    1.11
   8   0 -10   15.46    1.13
  -8   0  10   17.36    1.18
  -8   0  10   15.27    1.14
   8   0 -10   16.15    1.18
   8   0 -10   15.25    1.13
   0  -6   5    4.13    0.46
   0   6   5    3.90    0.53
   0   6  -5    3.58    0.28
   0   6   5    3.66    0.34
   0  -6  -5    2.84    0.48
   0  -6   5    3.80    0.37
   0  -6   5    4.12    0.36
   0  -6   5    4.07    0.38
   0  -6  -5    4.20    0.46
   0  -6  -5    3.36    0.29
   0  -6  -5    4.27    0.63
  -7  -5   2    6.86    0.54
  -7  -5   2    6.38    0.59
   7  -5  -2    6.61    0.62
   7  -5  -2    6.51    0.65
  -7  -5   2    7.04    0.48
   7   5  -2    4.65    0.53
  -7  -5   2    6.95    0.63
   7  -5  -2    6.15    0.63
   7  -5  -2    6.42    0.57
  -7   5   2    7.08    0.65
   7   5  -2    7.32    0.57
  -7   5   2    7.11    0.70
   8   4  -5    6.86    0.57
   8  -4  -5    6.26    0.66
   8  -4  -5    6.58    0.64
   8  -4  -5    6.92    0.58
  -8   4   5    7.09    0.66
   8   4  -5    6.19    0.57
  -8  -4   5    7.87    0.69
   8   4  -5    7.36    0.65
  -8  -4   5    6.86    0.51
  -8   4   5    6.07    0.55
  -8  -4   5    6.82    0.67
  -3   0 -13   16.41    1.21
   3   0  13   16.27    1.24
   3   0  13   12.00    0.88
   3   0  13   12.79    0.95
   3   0  13   14.06    0.90
  -3   0 -13   13.54    1.00
  -3   0 -13   13.54    0.95
  -6  -5   5    0.34    0.18
  -6   5   5    0.67    0.22
   6  -5  -5    0.52    0.35
   6  -5  -5    0.08    0.47
  -6   5   5   -0.06    0.42
  -6  -5   5    1.23    0.35
   6   5  -5    1.54    0.25
  -6  -5   5    2.08    0.40
   6  -5  -5    0.98    0.40
  -6   5   5    0.71    0.28
  -6  -5   5    0.83    0.14
   6  -5  -5    0.06    0.44
  -3  -5   8    0.78    0.15
  -3   5   8    1.43    0.41
  -3  -5   8    0.96    0.20
  -3  -5   8    0.84    0.30
  -3  -5   8    0.70    0.26
  -3   5   8    0.44    0.36
  -3  -5   8    0.87    0.15
   3  -5  -8    1.06    0.34
   3  -5  -8    0.51    0.42
  -8  -1  -9    2.08    0.36
  -8   1  -9    2.21    0.32
  -8  -1  -9    1.84    0.38
   8   1   9    2.19    0.39
   8  -1   9    1.58    0.33
  -8  -1  -9    2.08    0.45
  -8   1  -9    1.52    0.39
   8   1   9    1.62    0.53
  -8   1  -9    1.60    0.50
  -8  -1  -9    1.78    0.19
  -8  -1  -9    1.63    0.35
   8  -1   9    2.13    0.43
   8  -1   9    2.24    0.49
 -10  -3   1    4.51    0.61
 -10   3   1    4.62    0.54
  10   3  -1    4.95    0.48
  10  -3  -1    4.71    0.38
 -10  -3   1    4.23    0.33
  10  -3  -1    5.10    0.59
 -10  -3   1    5.01    0.51
 -10  -3   1    5.06    0.42
  10   3  -1    5.36    0.53
  10  -3  -1    5.03    0.51
  10  -3  -1    3.87    0.34
 -10   3   1    4.75    0.48
 -10   3   1    4.84    0.56
  10   3  -1    3.12    0.41
  10  -3   0    5.57    0.62
 -10   3   0    5.64    0.62
 -10  -3   0    5.57    0.60
 -10   3   0    5.57    0.53
  10   3   0    6.77    0.61
  10  -3   0    6.05    0.49
  10  -3   0    6.08    0.48
  10   3   0    6.78    0.62
 -10  -3   0    6.38    0.69
 -10  -3   0    6.54    0.48
 -10  -3   0    5.35    0.45
  10   3   0    6.44    0.62
 -10   3   0    6.24    0.64
  10  -3   0    5.39    0.63
  -7   3   9    3.00    0.39
  -7   3   9    4.34    0.52
   7   3  -9    4.54    0.35
   7   3  -9    3.70    0.42
  -7   3   9    3.08    0.57
   7   3  -9    3.94    0.49
   7   3  -9    4.09    0.48
   7   3  -9    2.69    0.25
  -7  -3   9    4.12    0.56
  -7  -3   9    4.21    0.50
   7  -3  -9    4.09    0.43
  -7  -3   9    4.19    0.39
  -7   3   9    4.54    0.42
   7  -3  -9    4.17    0.48
   1   6  -5   15.23    0.96
   1  -6  -5   13.46    0.98
  -1   6   5   14.57    0.98
  -1  -6   5   15.70    1.04
  -1  -6   5   13.80    0.92
  -1  -6   5   13.28    0.99
   1  -6  -5   13.41    1.09
   1  -6  -5   13.40    0.90
  -1  -6   5   13.03    0.89
  -1  -6   5   14.50    0.96
   1  -6  -5   16.03    1.17
  -5   0 -12   -0.22    0.42
   5   0  12   -0.16    0.22
   5   0  12   -0.32    0.43
  -5   0 -12    0.01    0.24
  -5   0 -12   -0.02    0.26
   5   0  12   -0.19    0.33
  -5   0 -12   -0.11    0.24
  -4  -5  -7   34.98    2.30
   4   5   7   31.37    1.91
   4   5   7   31.59    2.11
  -4   5  -7   34.76    2.18
  -4  -5  -7   36.95    2.33
   4  -5   7   32.90    2.17
   4  -5   7   32.91    2.10
   4  -5   7   32.53    2.10
  -4   5  -7   34.22    2.11
  -4  -5  -7   35.94    2.25
   4  -5   7   33.48    2.07
  -6   3  10   12.75    0.86
  -6  -3  10   11.92    0.83
  -6   3  10   13.05    1.00
   6  -3 -10   11.70    0.89
  -6  -3  10   11.98    0.92
   6   3 -10   11.02    0.81
  -6   3  10   11.76    0.92
   6   3 -10   12.94    1.03
  -6  -3  10   12.52    0.99
   6  -3 -10   12.11    0.88
   6  -3 -10   12.64    1.02
   6   3 -10   12.54    0.94
   1  -3  12   -0.07    0.39
  -1   3 -12    0.28    0.31
   1   3  12    0.48    0.46
  -1   3 -12    0.16    0.15
  -1  -3 -12    0.19    0.27
   1  -3  12   -0.26    0.23
  -1  -3 -12   -0.10    0.33
  -1  -3 -12   -0.01    0.46
   1   3  12   -0.21    0.49
   1   3  12   -0.09    0.22
  -1  -3 -12    0.23    0.37
   0  -2 -13    5.24    0.46
   0  -2 -13    5.26    0.41
   0   2 -13    6.47    0.67
   0  -2  13    5.88    0.65
   0   2  13    5.77    0.68
   0   2  13    6.02    0.52
   0  -2  13    5.54    0.54
   0   2  13    6.30    0.60
   0  -2 -13    5.53    0.58
   0   2 -13    5.43    0.51
   0  -2  13    6.76    0.60
   0  -2 -13    5.95    0.58
   0   2 -13    6.76    0.51
  -1  -2  13    0.42    0.32
  -1   2  13    1.88    0.51
   1  -2 -13    0.48    0.18
   1   2 -13    0.73    0.28
  -1  -2  13    0.61    0.41
   1   2 -13    1.04    0.45
   1   2 -13    0.75    0.19
   1  -2 -13    0.76    0.21
   1  -2 -13    0.25    0.36
  -1   2  13    0.84    0.31
   1  -2 -13    0.26    0.31
  -1   2  13    0.79    0.37
  -1  -2  13    0.31    0.33
  -5  -5  -6    6.78    0.67
   5  -5   6    8.58    0.67
   5  -5   6    6.51    0.56
  -5   5  -6    8.31    0.65
   5  -5   6    9.03    0.80
  -5  -5  -6    8.46    0.71
  -5   5  -6    7.53    0.58
  -5  -5  -6    8.01    0.62
   5   5   6    8.53    0.59
   5  -5   6    7.93    0.69
   5   5   6    8.62    0.83
 -11   1   3    6.03    0.66
 -11  -1   3    5.53    0.60
  11  -1  -3    5.45    0.58
 -11  -1   3    4.06    0.52
  11   1  -3    6.29    0.53
  11   1  -3    5.84    0.61
  11  -1  -3    5.94    0.50
  11   1  -3    7.38    0.72
 -11   1   3    4.88    0.44
  11  -1  -3    5.45    0.43
 -11  -1   3    4.86    0.39
   7   4  -7    5.03    0.44
  -7   4   7    5.35    0.53
  -7   4   7    4.99    0.48
   7  -4  -7    5.12    0.51
  -7  -4   7    5.02    0.31
  -7   4   7    5.30    0.46
  -7  -4   7    4.50    0.55
   7   4  -7    5.73    0.49
   7   4  -7    5.66    0.52
   7  -4  -7    4.61    0.53
  -7   4   7    5.39    0.60
   7  -4  -7    4.24    0.60
  -7  -4   7    5.03    0.47
   7  -4  -7    4.42    0.48
  -4   0  13   -0.27    0.31
  -4   0  13    0.20    0.40
   4   0 -13   -0.11    0.47
   4   0 -13    0.07    0.32
   4   0 -13    0.11    0.21
   4   0 -13    0.34    0.40
  -4   0  13   -0.08    0.30
   4  -6  -2    5.59    0.58
  -4   6   2    5.23    0.49
   4  -6  -2    5.07    0.54
   4  -6  -2    4.73    0.46
   4  -6  -2    5.77    0.63
  -4  -6   2    6.00    0.47
  -4  -6   2    4.86    0.53
  -4  -6   2    5.66    0.51
  -4  -6   2    5.98    0.61
   4   6  -2    5.24    0.53
   3  -4  10    0.36    0.48
  -3   4 -10    0.89    0.26
  -3  -4 -10    0.83    0.45
   3  -4  10    1.00    0.36
   3   4  10    0.34    0.40
  -3  -4 -10    0.66    0.35
   3  -4  10    0.71    0.38
   3  -4  10    0.39    0.48
  -3  -4 -10    0.82    0.33
   3   4  10    0.70    0.18
  -3   4 -10    1.36    0.25
   3  -4  10    0.47    0.21
  -3  -4 -10    0.48    0.31
   1  -6   5    2.80    0.40
  -1  -6  -5    3.28    0.50
  -1  -6  -5    3.11    0.31
  -1  -6  -5    2.66    0.51
  -1  -6  -5    2.79    0.37
  -1  -6  -5    2.74    0.26
   1  -6   5    3.00    0.36
   1  -6   5    2.17    0.32
   1   6   5    2.68    0.28
   1   6   5    2.75    0.47
  -1   6  -5    2.91    0.25
   1  -6   5    2.60    0.28
   2  -3 -12    4.24    0.66
   2   3 -12    4.53    0.52
   2  -3 -12    4.41    0.40
  -2   3  12    4.52    0.46
   2   3 -12    3.07    0.37
   2  -3 -12    4.33    0.54
  -2  -3  12    4.50    0.43
  -2   3  12    4.75    0.52
   2   3 -12    4.46    0.34
  -2  -3  12    3.22    0.47
  -2   3  12    5.07    0.63
  -2  -3  12    4.70    0.57
  11   1   2    0.60    0.34
 -11   1  -2    0.87    0.22
 -11  -1  -2    0.60    0.16
 -11   1  -2    0.69    0.42
 -11  -1  -2    0.52    0.45
  11   1   2    0.79    0.39
 -11  -1  -2    0.75    0.24
 -11   1  -2    0.63    0.22
  11   1   2    1.18    0.37
 -11   1  -2    0.78    0.44
  11  -1   2    0.49    0.42
 -11  -1  -2    1.01    0.48
  11  -1   2    0.72    0.33
   9  -3   5    3.01    0.43
  -9   3  -5    2.79    0.45
  -9  -3  -5    2.62    0.45
   9  -3   5    1.57    0.38
  -9   3  -5    2.01    0.42
  -9  -3  -5    2.30    0.20
   9   3   5    2.55    0.54
   9  -3   5    3.29    0.55
  -9  -3  -5    3.23    0.50
   9   3   5    3.07    0.41
  -9  -3  -5    2.72    0.42
  10   0  -7    0.17    0.34
  10   0  -7    0.12    0.18
 -10   0   7    0.13    0.22
  10   0  -7    0.01    0.17
  10   0  -7   -0.08    0.45
 -10   0   7    0.48    0.39
 -10   0   7   -0.55    0.52
 -10   0  -6    3.01    0.35
 -10   0  -6    3.30    0.38
 -10   0  -6    2.72    0.48
  10   0   6    3.15    0.52
  10   0   6    3.47    0.45
  10   0   6    2.91    0.42
 -10   0  -6    3.81    0.51
 -10   0  -6    3.59    0.28
   8  -3   7    1.40    0.39
  -8   3  -7    1.37    0.25
   8   3   7    0.95    0.42
   8   3   7    1.03    0.27
  -8  -3  -7    1.64    0.20
   8  -3   7    1.52    0.48
  -8   3  -7    1.44    0.37
  -8  -3  -7    1.35    0.39
  -8  -3  -7    1.50    0.35
   8  -3   7    1.28    0.37
  -8  -3  -7    1.20    0.38
  -8   3  -7    1.21    0.37
  10  -3  -2   10.59    0.82
  10  -3  -2    8.51    0.62
 -10   3   2    9.47    0.81
  10   3  -2   10.10    0.81
 -10  -3   2    9.81    0.87
  10   3  -2    7.77    0.65
 -10  -3   2   10.18    0.70
  10  -3  -2   11.00    0.77
  10  -3  -2    8.87    0.82
  10   3  -2   10.08    0.79
 -10   3   2    8.46    0.76
 -10  -3   2   10.14    0.85
 -10  -3   2    9.16    0.64
 -10   3   2    8.42    0.69
  10  -3  -2    9.71    0.88
  10  -3   1    0.54    0.21
 -10  -3  -1    0.63    0.26
  10   3   1    0.37    0.37
  10   3   1    0.39    0.29
  10  -3   1    0.50    0.19
 -10   3  -1    0.53    0.30
  10  -3   1    0.13    0.36
 -10   3  -1    0.74    0.44
  10  -3   1    0.19    0.43
 -10  -3  -1    0.41    0.46
 -11   0   4    0.33    0.22
  11   0  -4    0.17    0.17
 -11   0   4   -0.01    0.37
 -11   0   4    0.47    0.48
  11   0  -4   -0.00    0.17
  11   0  -4   -0.28    0.35
  11   0  -4    0.91    0.50
  -3   6   4    0.15    0.28
  -3  -6   4    0.03    0.15
   3  -6  -4   -0.19    0.41
  -3  -6   4   -0.01    0.34
  -3   6   4    0.70    0.33
   3  -6  -4    0.34    0.35
   3  -6  -4    0.49    0.26
  -3  -6   4    0.28    0.20
  -3  -6   4    0.03    0.17
  -3  -6   4   -0.21    0.46
   3  -6  -4   -0.01    0.46
  -7   5  -2    1.14    0.39
  -7  -5  -2    0.73    0.35
  -7  -5  -2    0.43    0.15
   7  -5   2    0.46    0.26
   7   5   2    0.88    0.42
  -7  -5  -2    0.35    0.35
   7  -5   2    0.56    0.19
   7   5   2    0.29    0.20
  -7   5  -2    0.24    0.30
   7  -5   2    0.33    0.28
  -7  -5  -2    0.16    0.36
   7  -5   2    0.31    0.35
   7  -5   2   -0.02    0.36
  -4  -6  -2    2.39    0.34
   4  -6   2    2.70    0.28
  -4  -6  -2    2.54    0.48
   4   6   2    2.57    0.47
   4   6   2    3.02    0.24
   4  -6   2    3.21    0.49
   4  -6   2    2.45    0.44
  -4  -6  -2    3.23    0.45
   4  -6   2    2.78    0.40
  -4  -6  -2    2.72    0.29
  -4   6  -2    2.68    0.29
   4  -6   2    2.64    0.41
  -4   6  -2    2.26    0.33
   4  -3  11    1.09    0.36
  -4   3 -11    1.53    0.18
  -4  -3 -11    1.33    0.34
   4   3  11    1.78    0.39
  -4  -3 -11    1.70    0.34
  -4  -3 -11    1.09    0.36
[truncated: 942,362 more chars]
