# Supplementary material for: Rationalisation of Patterns of Competing Reactivity by X-ray Structure Determination: Reaction of Isomeric (Benzyloxythienyl)oxazolines with a Base
Source: Molecules. 2021 Dec 20;26(24):7690. doi: 10.3390/molecules26247690 (PMC8705950; doi:10.3390/molecules26247690)
Supplement: Supplementary file 1 [file molecules-26-07690-s001.zip › 21Mol supp mater/cpd 26.cif]

data_26
_audit_creation_date                               2016-06-22
_audit_creation_method                            'by CrystalStructure 4.2'

_publ_section_references
;
    ENTER OTHER REFERENCES

    Rigaku (2015). CrystalStructure. Version 4.2. 
    Rigaku Corporation, Tokyo, Japan.

    Burla, M. C., Caliandro, R., Camalli, M., Carrozzini, B., 
    Cascarano, G. L., Giacovazzo, C., Mallamo, M., Mazzone, A., 
    Polidori, G. and Spagna, R. 
    (2012). J. Appl. Cryst. 45, 357-361.
    SIR2011

    Sheldrick, G.M. (2008) SHELXL Version 2014/7, Acta Cryst. A64, 112-122.

    Rigaku (1998). REQAB. 
    Rigaku Corporation, Tokyo, Japan.

;


_chemical_formula_sum                             'C16 H17 N O S'
_chemical_formula_moiety                          'C16 H17 N O S'
_chemical_formula_weight                           271.38
_chemical_melting_point                            ?
_chemical_absolute_configuration
                                                 'unk'

#==============================================================================
# CRYSTAL DATA
_space_group_crystal_system                        monoclinic
_space_group_name_H-M_alt                         'P 1 21 1'
_space_group_name_Hall                            'P 2yb'
_space_group_IT_number                             4
loop_
_space_group_symop_id
_space_group_symop_operation_xyz
1   '+X,+Y,+Z'
2   '-X,1/2+Y,-Z'
#------------------------------------------------------------------------------
_cell_length_a                                     8.237(3)
_cell_length_b                                     5.717(2)
_cell_length_c                                     15.097(6)
_cell_angle_alpha                                  90.0000
_cell_angle_beta                                   90.539(10)
_cell_angle_gamma                                  90.0000
_cell_volume                                       710.9(5)
_cell_formula_units_Z                              2
_cell_measurement_reflns_used                      1296
_cell_measurement_theta_min                        2.50
_cell_measurement_theta_max                        27.20
_cell_measurement_temperature                      93
#------------------------------------------------------------------------------
_exptl_crystal_description                         needle
_exptl_crystal_colour                              colorless
_exptl_crystal_size_max                            0.120
_exptl_crystal_size_mid                            0.020
_exptl_crystal_size_min                            0.020
_exptl_crystal_density_diffrn                      1.268
_exptl_crystal_density_meas                        ?
_exptl_crystal_density_method                     'not measured'
_exptl_crystal_F_000                               288.00
_exptl_absorpt_coefficient_mu                      0.219
_exptl_absorpt_correction_type                     multi-scan
_exptl_absorpt_process_details                    'REQAB (Rigaku, 1998)'
_exptl_absorpt_correction_T_min                    0.666
_exptl_absorpt_correction_T_max                    0.996

#==============================================================================
# EXPERIMENTAL DATA

_diffrn_ambient_temperature                        93
_diffrn_radiation_type                            'Mo K\a'
_diffrn_radiation_wavelength                       0.71075
_diffrn_measurement_device_type                   'Rigaku XtaLAB P200'
_diffrn_measurement_method                         \w
_diffrn_detector_area_resol_mean                   5.814
_diffrn_reflns_number                              8540
_diffrn_reflns_av_R_equivalents                    0.0793
_diffrn_reflns_theta_max                           25.337
_diffrn_reflns_theta_min                           2.473
_diffrn_reflns_theta_full                          25.242
_diffrn_measured_fraction_theta_max                0.998
_diffrn_measured_fraction_theta_full               0.998
_diffrn_reflns_Laue_measured_fraction_max          0.998
_diffrn_reflns_Laue_measured_fraction_full         0.998
_diffrn_reflns_point_group_measured_fraction_max   0.998
_diffrn_reflns_point_group_measured_fraction_full  0.998
_diffrn_reflns_limit_h_min                        -9
_diffrn_reflns_limit_h_max                         9
_diffrn_reflns_limit_k_min                        -6
_diffrn_reflns_limit_k_max                         6
_diffrn_reflns_limit_l_min                        -18
_diffrn_reflns_limit_l_max                         18
_diffrn_standards_number                           0
_diffrn_standards_interval_count                   .
_diffrn_standards_decay_%                          ?
_reflns_number_total                               2580
_reflns_number_gt                                  2072
_reflns_threshold_expression                       F^2^>2.0\s(F^2^)
_reflns_Friedel_coverage          0.805
_reflns_Friedel_fraction_max      0.999
_reflns_Friedel_fraction_full     0.999

#==============================================================================
# REFINEMENT DATA

_refine_special_details
;
    Refinement was performed using all reflections. The weighted 
    R-factor (wR) and goodness of fit (S) are based on F^2^.
    R-factor (gt) are based on F. The threshold expression of
    F^2^ > 2.0 sigma(F^2^) is used only for calculating R-factor (gt).
;
_refine_ls_structure_factor_coef                   Fsqd
_refine_ls_R_factor_all                            0.0618
_refine_ls_R_factor_gt                             0.0481
_refine_ls_wR_factor_ref                           0.1141
_refine_ls_wR_factor_gt                            0.1086
_refine_ls_number_restraints                       1
_refine_ls_hydrogen_treatment                      constr
_refine_ls_number_reflns                           2580
_refine_ls_number_parameters                       172
_refine_ls_goodness_of_fit_ref                     0.906
_refine_ls_weighting_scheme                        calc
_refine_ls_weighting_details
                   'w = 1/[\s^2^(Fo^2^)+(0.0648P)^2^] where P=(Fo^2^+2Fc^2^)/3'
_atom_sites_solution_hydrogens                     geom
_atom_sites_solution_primary                       direct
_atom_sites_solution_secondary                     difmap
_refine_ls_shift/su_max                            0.000
_refine_diff_density_max                           0.24
_refine_diff_density_min                          -0.22
_refine_ls_extinction_method                       none
_refine_ls_extinction_coef                         ?
_refine_ls_abs_structure_details
;
 Flack x determined using 728 quotients [(I+)-(I-)]/[(I+)+(I-)]
 (Parsons, Flack and Wagner, Acta Cryst. B69 (2013) 249-259).
;
_refine_ls_abs_structure_Flack                     0.26(9)

loop_
_atom_type_symbol
_atom_type_description
_atom_type_scat_dispersion_real
_atom_type_scat_dispersion_imag
_atom_type_scat_source
  'C' 'C'  0.0033 0.0016 
;
International Tables for Crystallography
(Vol. C, Tables 4.2.6.8 and 6.1.1.4)
;
  'H' 'H'  0.0000 0.0000 
;
International Tables for Crystallography
(Vol. C, Table 6.1.1.4)
;
  'N' 'N'  0.0061 0.0033 
;
International Tables for Crystallography
(Vol. C, Tables 4.2.6.8 and 6.1.1.4)
;
  'O' 'O'  0.0106 0.0060 
;
International Tables for Crystallography
(Vol. C, Tables 4.2.6.8 and 6.1.1.4)
;
  'S' 'S'  0.1246 0.1234 
;
International Tables for Crystallography
(Vol. C, Tables 4.2.6.8 and 6.1.1.4)
;

#==============================================================================
# ATOMIC COORDINATES AND THERMAL PARAMETERS

loop_
 _atom_site_label
 _atom_site_type_symbol
 _atom_site_fract_x
 _atom_site_fract_y
 _atom_site_fract_z
 _atom_site_U_iso_or_equiv
 _atom_site_adp_type
 _atom_site_occupancy
 _atom_site_site_symmetry_order  
 _atom_site_calc_flag
 _atom_site_refinement_flags_posn
 _atom_site_refinement_flags_adp
 _atom_site_refinement_flags_occupancy
 _atom_site_disorder_assembly
 _atom_site_disorder_group
S1 S 0.17941(13) 1.0577(2) 0.03714(7) 0.0325(3) Uani 1 1 d . . . . .
O3 O 0.1816(4) 1.1721(5) 0.2647(2) 0.0335(8) Uani 1 1 d . . . . .
N4 N 0.3308(4) 0.8313(6) 0.2705(2) 0.0272(9) Uani 1 1 d . . . . .
C2 C 0.2505(5) 0.9411(8) 0.1343(3) 0.0283(10) Uani 1 1 d . . . . .
C3 C 0.2457(5) 1.0048(7) 0.2292(3) 0.0280(11) Uani 1 1 d . . . . .
C5 C 0.3923(5) 0.6480(8) 0.2112(3) 0.0262(10) Uani 1 1 d . . . . .
H5 H 0.3390 0.4954 0.2251 0.031 Uiso 1 1 calc R U . . .
C6 C 0.3317(5) 0.7375(8) 0.1227(3) 0.0262(10) Uani 1 1 d . . . . .
C7 C 0.3399(5) 0.6688(8) 0.0326(3) 0.0299(10) Uani 1 1 d . . . . .
H7 H 0.3928 0.5320 0.0118 0.036 Uiso 1 1 calc R U . . .
C8 C 0.2612(6) 0.8265(8) -0.0197(3) 0.0332(11) Uani 1 1 d . . . . .
H8 H 0.2523 0.8103 -0.0822 0.040 Uiso 1 1 calc R U . . .
C9 C 0.3534(5) 0.8196(8) 0.3664(3) 0.0304(11) Uani 1 1 d . . . . .
H9A H 0.3264 0.9736 0.3923 0.036 Uiso 1 1 calc R U . . .
H9B H 0.4692 0.7875 0.3797 0.036 Uiso 1 1 calc R U . . .
C10 C 0.2506(6) 0.6339(8) 0.4100(3) 0.0344(11) Uani 1 1 d . . . . .
H10A H 0.2755 0.4800 0.3832 0.041 Uiso 1 1 calc R U . . .
H10B H 0.1346 0.6682 0.3983 0.041 Uiso 1 1 calc R U . . .
C11 C 0.2797(6) 0.6207(9) 0.5098(3) 0.0393(13) Uani 1 1 d . . . . .
H11A H 0.3966 0.5933 0.5215 0.047 Uiso 1 1 calc R U . . .
H11B H 0.2504 0.7726 0.5368 0.047 Uiso 1 1 calc R U . . .
C12 C 0.1827(7) 0.4293(11) 0.5531(3) 0.0514(14) Uani 1 1 d . . . . .
H12A H 0.2056 0.4281 0.6169 0.062 Uiso 1 1 calc R U . . .
H12B H 0.0667 0.4573 0.5429 0.062 Uiso 1 1 calc R U . . .
H12C H 0.2129 0.2779 0.5276 0.062 Uiso 1 1 calc R U . . .
C13 C 0.5754(5) 0.6218(7) 0.2173(3) 0.0264(11) Uani 1 1 d . . . . .
C14 C 0.6743(5) 0.7960(8) 0.1843(3) 0.0278(10) Uani 1 1 d . . . . .
H14 H 0.6272 0.9316 0.1583 0.033 Uiso 1 1 calc R U . . .
C15 C 0.8418(5) 0.7743(8) 0.1889(3) 0.0301(11) Uani 1 1 d . . . . .
H15 H 0.9090 0.8939 0.1655 0.036 Uiso 1 1 calc R U . . .
C16 C 0.9107(5) 0.5788(9) 0.2274(3) 0.0297(10) Uani 1 1 d . . . . .
H16 H 1.0255 0.5630 0.2301 0.036 Uiso 1 1 calc R U . . .
C17 C 0.8126(6) 0.4057(8) 0.2621(3) 0.0320(11) Uani 1 1 d . . . . .
H17 H 0.8603 0.2722 0.2893 0.038 Uiso 1 1 calc R U . . .
C18 C 0.6449(5) 0.4261(8) 0.2574(3) 0.0284(10) Uani 1 1 d . . . . .
H18 H 0.5778 0.3072 0.2815 0.034 Uiso 1 1 calc R U . . .

loop_
 _atom_site_aniso_label
 _atom_site_aniso_U_11
 _atom_site_aniso_U_22
 _atom_site_aniso_U_33
 _atom_site_aniso_U_23
 _atom_site_aniso_U_13
 _atom_site_aniso_U_12
S1 0.0331(6) 0.0378(6) 0.0266(6) 0.0066(6) -0.0080(4) 0.0013(6)
O3 0.0348(18) 0.0341(17) 0.0315(17) -0.0047(16) -0.0036(14) 0.0041(15)
N4 0.030(2) 0.030(2) 0.0209(18) -0.0013(16) -0.0052(16) 0.0005(16)
C2 0.023(2) 0.032(2) 0.030(3) 0.004(2) -0.0056(19) -0.0037(19)
C3 0.025(2) 0.031(3) 0.028(2) 0.0012(19) -0.0048(19) -0.0032(18)
C5 0.029(2) 0.028(2) 0.021(2) 0.0003(19) -0.0052(18) 0.0012(19)
C6 0.022(2) 0.032(2) 0.025(2) 0.005(2) -0.0056(18) -0.0025(19)
C7 0.026(2) 0.036(2) 0.027(2) -0.003(2) -0.0052(19) -0.002(2)
C8 0.032(3) 0.043(3) 0.025(2) 0.003(2) -0.0086(19) -0.004(2)
C9 0.031(2) 0.039(3) 0.021(2) 0.000(2) -0.0076(19) 0.004(2)
C10 0.040(3) 0.042(3) 0.021(2) 0.001(2) -0.006(2) -0.001(2)
C11 0.049(3) 0.047(3) 0.022(2) 0.002(2) -0.008(2) 0.003(2)
C12 0.074(4) 0.051(3) 0.029(3) 0.004(3) 0.002(3) 0.000(3)
C13 0.032(2) 0.029(3) 0.018(2) -0.0033(18) -0.0065(18) 0.0017(18)
C14 0.035(3) 0.029(2) 0.019(2) -0.003(2) -0.0083(19) 0.001(2)
C15 0.031(2) 0.035(3) 0.025(2) -0.002(2) -0.0060(19) -0.007(2)
C16 0.027(2) 0.040(3) 0.022(2) -0.009(2) -0.0083(17) 0.001(2)
C17 0.040(3) 0.032(3) 0.023(2) -0.001(2) -0.011(2) 0.007(2)
C18 0.034(3) 0.029(2) 0.022(2) -0.001(2) -0.0050(19) -0.003(2)

#==============================================================================
_computing_data_collection
                                'CrystalClear-SM Expert 2.1 b45 (Rigaku, 2015)'
_computing_cell_refinement
                                               'CrystalClear-SM Expert 2.1 b45'
_computing_data_reduction
                                               'CrystalClear-SM Expert 2.1 b45'
_computing_structure_solution
                                                'SIR2011 (Burla, et al., 2012)'
_computing_structure_refinement
                                      'SHELXL Version 2014/7 (Sheldrick, 2008)'
_computing_publication_material
                                          'CrystalStructure 4.2 (Rigaku, 2015)'
_computing_molecular_graphics                     'CrystalStructure 4.2'

#==============================================================================
# MOLECULAR GEOMETRY

_geom_special_details
;
 All esds (except the esd in the dihedral angle between two l.s. planes)
 are estimated using the full covariance matrix.  The cell esds are taken
 into account individually in the estimation of esds in distances, angles
 and torsion angles; correlations between esds in cell parameters are only
 used when they are defined by crystal symmetry.  An approximate (isotropic)
 treatment of cell esds is used for estimating esds involving l.s. planes.
;

loop_
 _geom_bond_atom_site_label_1
 _geom_bond_atom_site_label_2
 _geom_bond_distance
 _geom_bond_site_symmetry_2
 _geom_bond_publ_flag
S1 C2 1.709(4) . ?
S1 C8 1.718(5) . ?
O3 C3 1.219(5) . ?
N4 C3 1.362(5) . ?
N4 C9 1.459(5) . ?
N4 C5 1.471(5) . ?
C2 C6 1.354(6) . ?
C2 C3 1.480(6) . ?
C5 C6 1.511(5) . ?
C5 C13 1.517(6) . ?
C5 H5 1.0000 . ?
C6 C7 1.418(6) . ?
C7 C8 1.359(6) . ?
C7 H7 0.9500 . ?
C8 H8 0.9500 . ?
C9 C10 1.512(6) . ?
C9 H9A 0.9900 . ?
C9 H9B 0.9900 . ?
C10 C11 1.526(6) . ?
C10 H10A 0.9900 . ?
C10 H10B 0.9900 . ?
C11 C12 1.507(7) . ?
C11 H11A 0.9900 . ?
C11 H11B 0.9900 . ?
C12 H12A 0.9800 . ?
C12 H12B 0.9800 . ?
C12 H12C 0.9800 . ?
C13 C14 1.383(6) . ?
C13 C18 1.393(6) . ?
C14 C15 1.386(6) . ?
C14 H14 0.9500 . ?
C15 C16 1.380(7) . ?
C15 H15 0.9500 . ?
C16 C17 1.384(7) . ?
C16 H16 0.9500 . ?
C17 C18 1.387(6) . ?
C17 H17 0.9500 . ?
C18 H18 0.9500 . ?

loop_
 _geom_angle_atom_site_label_1
 _geom_angle_atom_site_label_2
 _geom_angle_atom_site_label_3
 _geom_angle
 _geom_angle_site_symmetry_1
 _geom_angle_site_symmetry_3
 _geom_angle_publ_flag
C2 S1 C8 89.8(2) . . ?
C3 N4 C9 123.2(4) . . ?
C3 N4 C5 114.7(3) . . ?
C9 N4 C5 122.0(3) . . ?
C6 C2 C3 110.7(4) . . ?
C6 C2 S1 113.0(3) . . ?
C3 C2 S1 136.3(4) . . ?
O3 C3 N4 126.4(4) . . ?
O3 C3 C2 129.4(4) . . ?
N4 C3 C2 104.2(4) . . ?
N4 C5 C6 100.6(3) . . ?
N4 C5 C13 112.4(3) . . ?
C6 C5 C13 114.0(4) . . ?
N4 C5 H5 109.8 . . ?
C6 C5 H5 109.8 . . ?
C13 C5 H5 109.8 . . ?
C2 C6 C7 112.9(4) . . ?
C2 C6 C5 109.7(4) . . ?
C7 C6 C5 137.4(4) . . ?
C8 C7 C6 110.3(4) . . ?
C8 C7 H7 124.8 . . ?
C6 C7 H7 124.8 . . ?
C7 C8 S1 114.0(3) . . ?
C7 C8 H8 123.0 . . ?
S1 C8 H8 123.0 . . ?
N4 C9 C10 113.4(4) . . ?
N4 C9 H9A 108.9 . . ?
C10 C9 H9A 108.9 . . ?
N4 C9 H9B 108.9 . . ?
C10 C9 H9B 108.9 . . ?
H9A C9 H9B 107.7 . . ?
C9 C10 C11 112.4(4) . . ?
C9 C10 H10A 109.1 . . ?
C11 C10 H10A 109.1 . . ?
C9 C10 H10B 109.1 . . ?
C11 C10 H10B 109.1 . . ?
H10A C10 H10B 107.9 . . ?
C12 C11 C10 112.7(4) . . ?
C12 C11 H11A 109.1 . . ?
C10 C11 H11A 109.1 . . ?
C12 C11 H11B 109.1 . . ?
C10 C11 H11B 109.1 . . ?
H11A C11 H11B 107.8 . . ?
C11 C12 H12A 109.5 . . ?
C11 C12 H12B 109.5 . . ?
H12A C12 H12B 109.5 . . ?
C11 C12 H12C 109.5 . . ?
H12A C12 H12C 109.5 . . ?
H12B C12 H12C 109.5 . . ?
C14 C13 C18 119.6(4) . . ?
C14 C13 C5 119.7(4) . . ?
C18 C13 C5 120.7(4) . . ?
C13 C14 C15 120.5(4) . . ?
C13 C14 H14 119.8 . . ?
C15 C14 H14 119.8 . . ?
C16 C15 C14 120.0(4) . . ?
C16 C15 H15 120.0 . . ?
C14 C15 H15 120.0 . . ?
C15 C16 C17 119.9(4) . . ?
C15 C16 H16 120.0 . . ?
C17 C16 H16 120.0 . . ?
C18 C17 C16 120.4(4) . . ?
C18 C17 H17 119.8 . . ?
C16 C17 H17 119.8 . . ?
C17 C18 C13 119.7(4) . . ?
C17 C18 H18 120.2 . . ?
C13 C18 H18 120.2 . . ?

loop_
 _geom_torsion_atom_site_label_1
 _geom_torsion_atom_site_label_2
 _geom_torsion_atom_site_label_3
 _geom_torsion_atom_site_label_4
 _geom_torsion
 _geom_torsion_site_symmetry_1
 _geom_torsion_site_symmetry_2
 _geom_torsion_site_symmetry_3
 _geom_torsion_site_symmetry_4
 _geom_torsion_publ_flag
C8 S1 C2 C6 0.0(3) . . . . ?
C8 S1 C2 C3 -179.6(5) . . . . ?
C9 N4 C3 O3 1.8(7) . . . . ?
C5 N4 C3 O3 178.9(4) . . . . ?
C9 N4 C3 C2 -178.2(4) . . . . ?
C5 N4 C3 C2 -1.1(5) . . . . ?
C6 C2 C3 O3 -178.6(4) . . . . ?
S1 C2 C3 O3 0.9(8) . . . . ?
C6 C2 C3 N4 1.4(5) . . . . ?
S1 C2 C3 N4 -179.1(4) . . . . ?
C3 N4 C5 C6 0.5(4) . . . . ?
C9 N4 C5 C6 177.6(4) . . . . ?
C3 N4 C5 C13 122.2(4) . . . . ?
C9 N4 C5 C13 -60.7(5) . . . . ?
C3 C2 C6 C7 -179.9(4) . . . . ?
S1 C2 C6 C7 0.4(5) . . . . ?
C3 C2 C6 C5 -1.1(5) . . . . ?
S1 C2 C6 C5 179.2(3) . . . . ?
N4 C5 C6 C2 0.4(4) . . . . ?
C13 C5 C6 C2 -120.1(4) . . . . ?
N4 C5 C6 C7 178.8(5) . . . . ?
C13 C5 C6 C7 58.3(7) . . . . ?
C2 C6 C7 C8 -0.7(5) . . . . ?
C5 C6 C7 C8 -179.1(5) . . . . ?
C6 C7 C8 S1 0.7(5) . . . . ?
C2 S1 C8 C7 -0.4(4) . . . . ?
C3 N4 C9 C10 105.4(5) . . . . ?
C5 N4 C9 C10 -71.4(5) . . . . ?
N4 C9 C10 C11 178.5(4) . . . . ?
C9 C10 C11 C12 -177.6(4) . . . . ?
N4 C5 C13 C14 -69.9(5) . . . . ?
C6 C5 C13 C14 43.7(5) . . . . ?
N4 C5 C13 C18 108.7(4) . . . . ?
C6 C5 C13 C18 -137.6(4) . . . . ?
C18 C13 C14 C15 1.7(6) . . . . ?
C5 C13 C14 C15 -179.6(4) . . . . ?
C13 C14 C15 C16 -0.7(6) . . . . ?
C14 C15 C16 C17 -0.6(6) . . . . ?
C15 C16 C17 C18 0.8(6) . . . . ?
C16 C17 C18 C13 0.2(6) . . . . ?
C14 C13 C18 C17 -1.4(6) . . . . ?
C5 C13 C18 C17 179.9(4) . . . . ?

#==============================================================================

#==============================================================================
# Additional structures and associated data_? identifiers
# should be added at this point if there is more than one 
# structure analysis in the CIF.

_shelx_res_file
;

    shelxl.res created by SHELXL-2014/7

TITL AHAA16
CELL  0.71075 8.23700 5.71700 15.09700 90.00000 90.53900 90.00000
ZERR  2 0.00300 0.00200 0.00600 0.00000 0.01000 0.00000
LATT -1
SYMM    -X, .50+Y,    -Z
SFAC C H N O S
UNIT 32 34 2 2 2
OMIT    -1   0   1
L.S. 20
FMAP 2
PLAN 5
WPDB -2
HTAB
BOND $H
CONF
LIST 4
TEMP -180.0
ACTA
SIZE 0.020 0.020 0.120
WGHT    0.064800
FVAR       0.34231
S1    5    0.179411    1.057702    0.037135    11.00000    0.03307    0.03777 =
         0.02658    0.00664   -0.00802    0.00127
O3    4    0.181626    1.172118    0.264705    11.00000    0.03479    0.03407 =
         0.03147   -0.00467   -0.00362    0.00413
N4    3    0.330849    0.831298    0.270512    11.00000    0.03047    0.03011 =
         0.02087   -0.00127   -0.00517    0.00055
C2    1    0.250529    0.941057    0.134253    11.00000    0.02251    0.03187 =
         0.03030    0.00423   -0.00557   -0.00367
C3    1    0.245688    1.004756    0.229223    11.00000    0.02528    0.03057 =
         0.02814    0.00118   -0.00480   -0.00317
C5    1    0.392325    0.647993    0.211195    11.00000    0.02929    0.02811 =
         0.02114    0.00032   -0.00524    0.00116
AFIX  13
H5    2    0.339010    0.495378    0.225113    11.00000   -1.20000
AFIX   0
C6    1    0.331704    0.737519    0.122723    11.00000    0.02196    0.03175 =
         0.02469    0.00541   -0.00564   -0.00249
C7    1    0.339913    0.668767    0.032616    11.00000    0.02649    0.03609 =
         0.02713   -0.00256   -0.00522   -0.00180
AFIX  43
H7    2    0.392835    0.532010    0.011814    11.00000   -1.20000
AFIX   0
C8    1    0.261245    0.826489   -0.019743    11.00000    0.03150    0.04292 =
         0.02507    0.00302   -0.00858   -0.00392
AFIX  43
H8    2    0.252329    0.810262   -0.082225    11.00000   -1.20000
AFIX   0
C9    1    0.353402    0.819552    0.366361    11.00000    0.03066    0.03905 =
         0.02128    0.00017   -0.00762    0.00438
AFIX  23
H9A   2    0.326356    0.973642    0.392253    11.00000   -1.20000
H9B   2    0.469187    0.787489    0.379694    11.00000   -1.20000
AFIX   0
C10   1    0.250635    0.633910    0.409961    11.00000    0.03994    0.04217 =
         0.02109    0.00138   -0.00630   -0.00103
AFIX  23
H10A  2    0.275502    0.480037    0.383240    11.00000   -1.20000
H10B  2    0.134569    0.668161    0.398313    11.00000   -1.20000
AFIX   0
C11   1    0.279689    0.620707    0.509821    11.00000    0.04933    0.04657 =
         0.02187    0.00196   -0.00760    0.00319
AFIX  23
H11A  2    0.396626    0.593276    0.521467    11.00000   -1.20000
H11B  2    0.250441    0.772622    0.536802    11.00000   -1.20000
AFIX   0
C12   1    0.182733    0.429283    0.553105    11.00000    0.07390    0.05146 =
         0.02897    0.00411    0.00165   -0.00028
AFIX  33
H12A  2    0.205602    0.428135    0.616924    11.00000   -1.20000
H12B  2    0.066674    0.457323    0.542934    11.00000   -1.20000
H12C  2    0.212889    0.277942    0.527597    11.00000   -1.20000
AFIX   0
C13   1    0.575351    0.621764    0.217281    11.00000    0.03247    0.02919 =
         0.01753   -0.00329   -0.00646    0.00172
C14   1    0.674292    0.796021    0.184286    11.00000    0.03467    0.02914 =
         0.01940   -0.00254   -0.00827    0.00130
AFIX  43
H14   2    0.627153    0.931579    0.158292    11.00000   -1.20000
AFIX   0
C15   1    0.841754    0.774275    0.188875    11.00000    0.03084    0.03467 =
         0.02461   -0.00185   -0.00599   -0.00697
AFIX  43
H15   2    0.909000    0.893893    0.165517    11.00000   -1.20000
AFIX   0
C16   1    0.910735    0.578751    0.227396    11.00000    0.02730    0.03972 =
         0.02198   -0.00894   -0.00827    0.00145
AFIX  43
H16   2    1.025487    0.562956    0.230087    11.00000   -1.20000
AFIX   0
C17   1    0.812555    0.405700    0.262105    11.00000    0.04048    0.03238 =
         0.02288   -0.00110   -0.01078    0.00712
AFIX  43
H17   2    0.860256    0.272182    0.289294    11.00000   -1.20000
AFIX   0
C18   1    0.644879    0.426118    0.257416    11.00000    0.03380    0.02936 =
         0.02199   -0.00127   -0.00498   -0.00317
AFIX  43
H18   2    0.577816    0.307249    0.281460    11.00000   -1.20000
AFIX   0
HKLF 4

REM  AHAA16
REM R1 =  0.0481 for    2072 Fo > 4sig(Fo)  and  0.0618 for all    2580 data
REM    172 parameters refined using      1 restraints

END

WGHT      0.0539      0.0000

REM Instructions for potential hydrogen bonds
EQIV $1 x, y-1, z
HTAB C5 O3_$1
HTAB C10 O3_$1

REM Highest difference peak  0.243,  deepest hole -0.217,  1-sigma level  0.052
Q1    1   0.2764  1.0191 -0.0044  11.00000  0.05    0.24
Q2    1   0.0827  1.0115  0.0715  11.00000  0.05    0.22
Q3    1   0.1789  1.2373  0.0340  11.00000  0.05    0.22
Q4    1   0.3575  0.8854  0.1139  11.00000  0.05    0.22
Q5    1   0.2886  1.1687  0.2366  11.00000  0.05    0.21
;

_shelx_res_checksum   62368

_shelx_hkl_file
;
   1   0   0   34.65    2.92
  -1   0   0   33.81    3.86
   1   0   0   40.39    3.75
  -1   0   0   27.82    2.94
  -1   0   1    9.87    3.71
  -1   0  -1   65.74    5.31
  -1   0  -1   66.83    4.75
  -1   0  -1   60.00    3.66
   1   0   1   77.78    4.25
   0   1   0    1.63    2.39
   0  -1   0    1.49    1.76
   0   1   0    0.71    1.49
   0   1   0    1.08    3.78
  -1   0   2   47.57    3.27
  -1   0   2   41.17    2.62
   1   0  -2   42.09    3.25
   1   0  -2   41.35    2.79
   1   0  -2   47.58    2.56
  -1   0   2   46.43    2.48
  -1   0  -2   16.97    3.24
  -1   0  -2   11.27    1.54
  -1   0  -2   11.16    3.85
  -1   0  -2   11.23    2.24
   1   0   2   10.51    1.45
   0  -1  -1  237.44   10.67
   0   1  -1  302.38   12.77
   0  -1   1  242.97   10.51
   0   1   1  279.74   12.41
   0   1  -1  243.90   10.53
   0   1   1  312.48   13.23
   0  -1  -1  289.98   12.32
   0   1  -1  244.83   10.67
   0   1  -1  279.93   12.38
   0  -1  -1  270.41   11.31
   0   1   1  259.61   10.86
   0   1   1  277.96   12.45
   0   0  -3   17.75    2.56
   0   0  -3   14.66    2.09
   0   0   3   18.36    2.46
  -1  -1   0  348.03   14.50
  -1  -1   0  329.62   14.13
   1   1   0  350.61   14.66
  -1   1   0  292.74   12.75
  -1   1   0  351.08   14.48
   1   1   0  339.41   14.53
  -1  -1   0  314.28   13.56
  -1   1   0  296.73   12.67
   1   1   0  308.68   13.49
   0   1   2   32.78    2.17
   0   1   2   31.44    3.87
   0   1   2   30.87    2.42
   0   1  -2   28.25    2.58
   0  -1  -2   31.45    2.57
   0  -1   2   29.68    2.64
   0   1  -2   27.87    1.75
   0   1  -2   28.44    2.03
   0  -1  -2   31.53    2.17
   0   1  -2   30.54    3.59
   0  -1  -2   35.86    2.66
   0   1   2   35.51    2.61
  -1   1   1  198.49    8.70
  -1  -1   1  198.70    8.70
  -1   1   1  236.91   11.25
  -1   1   1  221.40    9.41
   1  -1  -1  179.80    8.91
   1   1  -1  200.12    9.04
   1   1  -1  239.63   10.22
  -1  -1   1  199.12    8.86
   1   1  -1  212.16    9.52
  -1  -1  -1  458.95   18.88
  -1   1  -1  503.66   20.61
  -1  -1  -1  465.05   19.45
   1   1   1  464.04   19.84
  -1   1  -1  385.37   16.38
   1   1   1  470.33   19.64
   1   1   1  458.96   18.89
  -1  -1  -1  426.70   18.17
  -1   0   3  124.02    5.95
  -1   0   3  132.39    5.86
   1   0  -3  122.92    6.02
   1   0  -3  116.03    5.49
   1   0  -3  128.51    5.72
  -1   0  -3   65.94    3.34
   1   0   3   72.54    4.12
  -1   0  -3   73.32    4.05
  -1   0  -3   62.89    3.57
  -1   0  -3   73.42    4.66
  -1   0  -3   71.26    3.89
   1   0   3   67.55    4.27
  -2   0   0 1176.40   48.57
   2   0   0 1213.58   48.97
  -2   0   0 1186.81   47.81
  -2   0   0 1304.25   41.48
   1   1  -2  249.99   10.66
   1  -1  -2  224.25    9.71
   1   1  -2  239.17   10.59
  -1   1   2  229.46    9.85
  -1  -1   2  255.17   11.05
   1   1  -2  243.78   10.61
   1  -1  -2  261.91   11.70
  -1   1   2  270.99   12.12
  -1   1   2  250.68   10.52
  -1   1   2  277.51   11.83
   2   0  -1  124.63    7.08
   2   0  -1  139.03    6.70
  -2   0   1  128.69    7.25
  -2   0   1  134.37    6.98
   2   0  -1  131.13    7.09
  -2   0   1  122.24    6.43
   1   1   2   79.07    4.17
   1  -1   2   81.76    4.29
  -1   1  -2   79.71    3.86
  -1  -1  -2   76.69    4.94
   1   1   2   76.35    3.79
   1   1   2   76.73    4.96
  -1  -1  -2   81.38    4.41
   1   1   2   86.75    4.65
  -1  -1  -2   78.85    3.91
  -2   0  -1    6.80    5.14
   2   0   1    5.83    1.40
   2   0   1    7.94    5.06
  -2   0  -1    5.12    1.44
  -2   0  -1    5.29    2.14
   0   1  -3  178.33    7.95
   0   1   3  162.33    7.30
   0   1   3  183.08    8.01
   0  -1  -3  185.87    8.16
   0   1  -3  169.78    8.38
   0  -1   3  171.03    8.12
   0   1   3  164.72    7.14
   0  -1  -3  161.35    7.03
   0   1   3  171.97    8.44
   0  -1  -3  169.89    7.62
   0   0  -4  647.84   26.57
   0   0  -4  706.42   29.05
   0   0   4  655.10   26.55
   0   0   4  718.00   29.60
   2   0  -2    9.50    1.31
  -2   0   2    8.63    2.06
   2   0  -2    5.92    2.36
   2   0  -2    6.62    1.70
   2   0  -2    8.35    1.77
   2   0   2   83.54    3.97
   2   0   2   78.25    4.23
  -2   0  -2   84.13    4.04
  -2   0  -2   80.71    4.10
  -2   0  -2   83.77    4.55
   2   0   2   87.36    4.99
  -2   0  -2   90.09    5.29
   1   0  -4  249.61   10.50
   1   0  -4  249.75   10.96
   1   0  -4  227.05    9.77
   1   1  -3   72.78    4.01
  -1  -1   3   82.40    4.41
  -1   1   3   85.68    4.33
  -1   1   3   83.41    5.02
  -1   1   3   73.17    3.58
   1   1  -3   70.53    4.08
   1   1  -3   75.26    4.28
   1  -1  -3   74.79    4.55
   1  -1  -3   70.86    3.76
  -1   1   3   67.22    3.51
  -1   1  -3  153.03    7.02
   1   1   3  194.84    8.61
   1   1   3  190.35    8.47
  -1   1  -3  166.93    7.25
  -1   1  -3  175.50    7.77
  -1  -1  -3  179.21    7.98
  -1   1  -3  173.44    7.45
  -1  -1  -3  173.50    8.33
   1  -1   3  185.75    7.91
   1   1   3  170.00    8.22
  -1  -1  -3  177.77    7.71
  -1  -1  -3  186.34    8.29
   1   0   4  124.14    6.08
  -1   0  -4  115.60    5.20
  -1   0  -4  113.59    5.49
   1   0   4  128.66    5.86
  -1   0  -4  127.40    5.93
  -1   0  -4  127.10    6.39
   1   0   4  120.79    5.46
   2   1   0  430.81   17.78
  -2   1   0  468.79   19.58
  -2  -1   0  427.74   17.94
   2  -1   0  481.64   19.68
   2  -1   0  421.25   17.70
   2   1   0  431.88   18.20
  -2   1   0  397.05   16.46
  -2   1   0  373.12   15.74
  -2  -1   0  464.94   19.29
  -2   1   0  446.40   18.34
  -2  -1   0  415.01   17.66
  -2   1   1  333.84   14.34
  -2   1   1  361.93   15.61
   2  -1  -1  350.81   14.69
   2  -1  -1  303.08   13.19
  -2  -1   1  352.28   15.03
   2   1  -1  342.94   14.58
  -2  -1   1  331.54   13.78
  -2   1   1  323.43   13.60
   2   1  -1  335.82   13.92
  -2  -1   1  317.63   13.54
   2  -1  -1  323.55   13.68
  -2   1   1  275.75   15.31
  -2  -1  -1   13.77    2.20
   2   1   1   14.09    1.76
   2  -1   1   15.93    3.38
   2  -1   1   18.12    1.98
  -2  -1  -1   14.13    2.51
  -2   1  -1   14.53    3.83
   2   1   1   14.30    1.49
  -2  -1  -1   14.63    1.67
  -2   1  -1   12.21    1.55
   2   1   1   13.45    2.06
   2   0  -3    5.70    1.90
  -2   0   3    7.33    1.97
   2   0  -3    7.52    1.17
   2   0  -3    7.34    1.63
   2   0   3    1.49    1.19
  -2   0  -3    1.46    1.13
   2   0   3    1.16    1.66
  -2   0  -3    2.23    2.54
  -2   0  -3    1.53    1.74
  -2   0  -3    0.38    1.40
   0   1  -4  235.60   10.40
   0   1   4  258.85   11.65
   0  -1  -4  255.29   10.87
   0   1   4  239.76   10.30
   0   1  -4  278.76   12.03
   0  -1  -4  242.76   10.46
   0  -1  -4  241.36   10.20
   0   1  -4  238.48    9.94
   0   1   4  246.31   10.51
   0  -1   4  241.47   10.45
   0  -1   4  257.81   11.24
  -2   1   2  100.19    5.21
   2   1  -2   95.88    4.58
  -2   1   2   85.32    4.34
   2  -1  -2   91.94    4.69
  -2  -1   2   95.36    4.78
  -2  -1   2   95.64    4.53
  -2   1   2   86.61    5.91
   2   1  -2   95.97    5.00
  -2   1   2   93.57    4.76
  -2  -1   2   97.38    5.12
   2  -1   2    8.57    1.58
   2   1   2    5.64    1.16
  -2   1  -2    9.77    3.05
  -2  -1  -2    5.47    1.44
  -2   1  -2    5.59    1.83
  -2  -1  -2    4.92    2.55
   2  -1   2    8.11    2.61
  -2  -1  -2    5.75    1.99
   2   1   2    6.25    1.80
  -2   1  -2    9.03    1.61
   0   0   5  194.63    8.29
   0   0   5  192.10    8.30
   0   0  -5  193.72    8.53
   0   0  -5  209.24    8.98
   0   0  -5  208.07    9.31
   0   0   5  216.41    9.58
   1  -1  -4   74.12    3.87
  -1   1   4   68.61    3.58
   1   1  -4   76.39    4.31
  -1  -1   4   78.01    4.20
   1   1  -4   72.26    3.68
  -1   1   4   74.24    3.78
  -1  -1   4   75.10    3.74
  -1   1   4   78.90    3.74
  -1   1   4   60.88    3.99
   1  -1  -4   85.93    4.96
  -1  -1  -4  146.99    6.71
  -1  -1  -4  141.43    6.54
  -1  -1  -4  136.54    6.83
  -1   1  -4  143.42    6.82
  -1  -1  -4  137.61    6.12
   1   1   4  137.67    6.91
  -1   1  -4  139.46    6.29
  -1   1  -4  137.54    6.30
   1   1   4  144.68    6.63
  -1   1  -4  146.95    6.39
   0   2   0   18.91    2.23
   0   2   0   23.27    2.21
   0   2   0   23.92    1.97
   0  -2   0   21.60    1.75
   0  -2   0   24.24    2.27
   0   2   0   23.32    1.79
   0  -2   0   21.20    1.81
   1   0  -5   -0.09    1.97
   1   0  -5    0.78    1.35
   1   0  -5    1.85    1.11
   1   0   5    9.81    2.04
  -1   0  -5    9.15    1.83
   1   0   5   11.39    1.52
  -1   0  -5   10.06    1.57
  -1   0  -5    9.96    2.34
  -1   0  -5    9.00    1.25
   1   0   5    9.62    1.30
   0  -2   1   14.20    2.15
   0   2   1   14.43    1.77
   0   2   1   15.74    1.98
   0   2  -1   16.09    2.10
   0  -2  -1   13.45    1.81
   0  -2   1   14.48    1.99
   0  -2   1   15.33    1.52
   0   2   1   13.88    1.45
   0   2  -1   13.17    1.42
   0   2   1   10.64    2.28
   0   2  -1   12.51    2.05
   0  -2  -1   13.47    1.68
   0   2  -1   15.32    2.30
   2   0  -4    1.27    1.00
   2   0  -4    2.46    1.37
  -2   0   4    2.64    1.81
  -2   0   4    1.96    1.00
   2   0  -4    1.13    1.79
  -2  -1   3    5.58    1.33
   2  -1  -3    5.67    1.57
  -2   1   3    6.34    1.48
   2   1  -3    5.12    1.93
   2  -1  -3   10.78    2.21
  -2   1   3    1.42    1.76
   2   1  -3    5.17    1.38
  -2   1   3    5.67    1.30
  -2  -1  -3   78.66    3.76
  -2  -1  -3   77.79    4.59
  -2   1  -3   77.10    4.08
  -2  -1  -3   76.69    3.77
  -2  -1  -3   79.83    4.33
   2  -1   3   73.59    3.44
  -2  -1  -3   74.66    4.00
  -2   1  -3   72.36    3.58
   2  -1   3   76.31    3.63
  -2   1  -3   74.83    4.38
   2  -1   3   85.34    4.51
  -2   0  -4  186.99    8.45
  -2   0  -4  187.11    8.00
  -2   0  -4  174.83    7.58
   2   0   4  167.63    7.36
  -2   0  -4  192.82    8.95
   2   0   4  194.49    8.58
   3   0   0    0.78    1.21
  -3   0   0    0.18    1.93
   3   0   0   -0.07    1.94
  -3   0   0    0.86    1.20
  -3   0   0   -0.01    1.65
   3   0  -1  114.81    5.61
  -3   0   1  104.53    5.04
  -3   0   1  117.48    5.35
   3   0  -1  118.55    5.39
  -3   0   1  128.50    6.22
  -1   2   0   43.81    2.44
   1   2   0   47.36    2.66
   1   2   0   39.79    3.02
   1  -2   0   40.90    2.63
   1  -2   0   39.53    2.44
  -1  -2   0   43.31    2.39
  -1   2   0   42.58    2.98
  -1  -2   0   42.01    2.90
  -1  -2   0   48.50    2.82
  -1  -2   0   44.70    2.95
   1   2   0   38.20    2.77
   1  -2   0   51.14    3.05
  -1   2   0   44.37    2.56
   1  -2   0   40.56    2.27
  -1   2   0   40.18    2.46
   3   0   1   47.02    3.03
  -3   0  -1   50.75    3.49
   3   0   1   50.47    3.44
   3   0   1   42.05    2.40
  -3   0  -1   51.22    2.83
  -3   0  -1   49.71    3.23
   0   2   2   57.39    4.11
   0   2  -2   53.56    2.92
   0  -2   2   44.04    2.40
   0   2   2   54.07    2.84
   0   2  -2   45.82    2.67
   0   2  -2   57.71    3.47
   0   2   2   54.88    3.12
   0   2   2   63.18    3.53
   0   2  -2   50.16    3.26
   0  -2   2   50.78    3.11
   0  -2  -2   51.26    2.94
   0  -2   2   56.79    2.99
   0   1  -5   80.12    3.71
   0   1   5   85.95    4.18
   0  -1  -5   90.02    4.38
   0   1  -5   81.78    4.39
   0  -1  -5   82.06    3.92
   0  -1   5   79.66    3.98
   0  -1   5   81.56    4.17
   0   1   5   92.39    5.13
   0  -1  -5   84.79    4.28
   0   1  -5   80.66    4.03
   0   1   5   81.18    4.08
  -1  -2   1   67.59    3.78
  -1   2   1   68.49    4.13
   1   2  -1   76.46    3.85
  -1  -2   1   63.72    3.28
   1  -2  -1   62.34    3.22
   1  -2  -1   60.73    3.24
  -1   2   1   62.38    3.30
  -1  -2   1   74.11    3.80
  -1   2   1   63.91    3.18
   1   2  -1   60.17    3.57
   1  -2  -1   68.21    3.60
  -1   2   1   69.05    3.61
  -1  -2   1   60.81    3.41
   1  -2  -1   63.15    3.58
   1   2  -1   62.12    3.68
   1   2   1   53.50    3.68
   1  -2   1   46.14    2.55
   1   2   1   61.40    3.15
   1  -2   1   61.78    3.13
  -1   2  -1   55.23    3.28
  -1   2  -1   57.99    2.98
   1  -2   1   55.34    3.15
   1   2   1   60.77    3.63
  -1   2  -1   58.98    3.06
   1   2   1   58.22    3.32
  -1   2  -1   49.31    2.73
   1  -2   1   62.81    3.46
  -1  -2  -1   54.83    3.50
  -1  -2  -1   59.01    3.26
   3   0  -2   45.24    2.67
  -3   0   2   48.09    3.17
   3   0  -2   41.78    2.69
   3   0   2   -0.24    1.11
  -3   0  -2   -0.15    1.18
   3   0   2   -0.22    1.61
  -3   0  -2   -0.78    1.78
  -3   0  -2    0.39    2.08
   1  -1  -5   41.37    2.19
  -1   1   5   36.41    2.24
   1   1  -5   35.40    2.59
  -1  -1   5   37.34    2.26
  -1  -1   5   38.87    2.74
   1   1  -5   38.48    1.87
  -1   1   5   40.12    2.35
  -1   1   5   33.18    3.17
   1  -1  -5   41.86    3.27
   1   1  -5   35.34    2.32
   1  -1  -5   38.69    2.39
   1  -2  -2   79.21    3.45
  -1   2   2   89.87    3.68
   1  -2  -2   83.57    3.99
  -1  -2   2   78.07    3.23
  -1   2   2   79.17    3.21
  -1   2   2   74.77    3.25
  -1   2   2   84.58    4.44
   1   2  -2   87.11    3.73
  -1  -2   2   87.14    3.91
   1  -2  -2   73.14    3.25
  -1  -2   2   81.67    3.83
   1   2  -2   78.98    3.77
  -1  -2   2   77.62    3.51
  -1  -2  -2   34.70    2.78
  -1  -2  -2   39.53    2.14
  -1   2  -2   35.14    1.87
   1   2   2   36.21    2.06
   1   2   2   31.04    2.88
  -1   2  -2   34.17    2.18
   1   2   2   39.67    2.46
  -1   2  -2   38.50    2.88
   1   2   2   41.72    2.70
   1  -2   2   32.74    1.84
  -1  -2  -2   38.50    2.34
  -1   2  -2   31.31    1.87
   1  -2   2   40.41    2.06
  -1   1  -5   63.16    2.61
  -1  -1  -5   59.07    3.69
   1   1   5   62.02    3.05
   1  -1   5   61.61    2.65
   1   1   5   58.19    2.59
  -1  -1  -5   55.71    2.49
   1  -1   5   63.50    2.94
   1   1   5   62.55    3.80
  -1   1  -5   62.53    2.76
  -1  -1  -5   63.53    3.06
  -1   1  -5   56.47    2.97
  -1   1  -5   56.24    2.75
  -1  -1  -5   60.36    3.04
  -1   1  -5   60.81    3.01
   0   0   6   45.62    2.25
   0   0   6   44.37    2.11
   0   0   6   47.20    2.85
   0   0  -6   46.77    2.99
   0   0  -6   42.58    2.48
   0   0   6   42.90    2.38
   0   0  -6   45.52    2.78
   0   0  -6   47.28    2.31
  -2   1   4  110.30    4.25
   2  -1  -4  119.33    4.67
  -2   1   4  110.72    5.54
  -2  -1   4  111.92    4.28
   2   1  -4  126.53    5.31
   2   1  -4  111.90    4.30
   2  -1  -4  113.60    6.17
  -2   1   4  124.02    4.63
   2  -1  -4  106.39    5.36
  -2   1  -4   61.65    2.79
   2   1   4   59.15    2.63
  -2  -1  -4   60.70    2.73
   2  -1   4   56.06    2.43
  -2   1  -4   60.41    3.56
  -2  -1  -4   61.17    3.58
  -2   1  -4   58.31    2.87
  -2  -1  -4   62.74    2.69
   2  -1   4   60.79    2.59
  -2   1  -4   59.46    2.59
  -2  -1  -4   58.04    3.05
  -2  -1  -4   59.53    3.07
   0   2  -3    3.14    1.71
   0   2   3    3.45    1.23
   0  -2   3    3.35    1.08
   0  -2  -3    2.47    1.03
   0   2   3    3.61    1.47
   0   2  -3    2.80    1.27
   0  -2   3    3.00    1.45
   0   2   3    3.55    1.05
   0   2   3    2.97    2.47
   0  -2  -3    4.39    2.03
   0   2  -3    2.22    1.62
   0  -2  -3    2.45    1.51
  -3  -1   0   18.88    2.06
   3   1   0   19.41    2.08
  -3  -1   0   19.54    1.58
  -3   1   0   21.63    1.82
   3   1   0   18.45    2.39
  -3  -1   0   20.36    2.25
  -3  -1   0   22.09    1.92
   3   1   0   19.66    1.47
   3  -1   0   20.54    1.68
  -3   1   0   23.53    2.34
   3  -1   0   23.72    2.27
  -2   0   5   13.64    1.23
   2   0  -5   13.51    1.81
  -2   0   5   12.51    1.87
   2   0  -5   12.48    1.72
   2   0  -5   12.35    2.07
  -2   0   5   12.19    1.44
   2   0  -5   10.71    1.08
   3   1  -1  122.91    5.16
  -3  -1   1  137.70    5.61
   3   1  -1  133.12    5.44
   3  -1  -1  144.02    5.32
  -3   1   1  125.85    5.13
   3  -1  -1  132.99    5.40
  -3  -1   1  124.51    4.94
   3   1  -1  132.58    4.89
  -3  -1   1  133.08    4.90
  -3   1   1  114.47    4.30
  -3   1  -1  166.42    5.87
  -3   1  -1  168.63    6.40
   3   1   1  178.94    7.99
  -3  -1  -1  182.95    8.63
   3  -1   1  180.55    8.11
  -3  -1  -1  184.64    8.41
   3   1   1  189.82    9.15
   3  -1   1  168.66    6.38
  -3   1  -1  179.75    8.99
  -3  -1  -1  178.16    8.43
  -2   0  -5   34.89    2.39
   2   0   5   32.60    1.90
  -2   0  -5   34.80    1.87
  -2   0  -5   33.60    1.86
  -2   0  -5   31.82    2.28
  -2   0  -5   34.21    3.05
   2   0   5   38.29    2.30
   3   0  -3    0.33    1.32
   3   0  -3   -0.88    1.75
  -3   0   3   -0.82    1.51
   3   0  -3   -0.77    1.29
   1   0  -6   16.49    2.08
  -1   0   6   17.07    1.60
   1   0  -6   16.24    1.71
   1   0  -6   17.06    1.38
   3   0   3   64.04    2.74
   3   0   3   64.14    4.29
  -3   0  -3   69.44    3.93
  -3   0  -3   65.15    3.03
  -3   0  -3   65.27    2.83
   3   0   3   66.43    3.31
  -3   0  -3   64.13    3.26
   1   0   6   55.18    2.48
   1   0   6   58.64    3.21
  -1   0  -6   58.91    3.32
   1   0   6   54.37    2.75
  -1   0  -6   53.80    2.85
  -1   0  -6   57.84    2.75
  -1   0  -6   53.71    2.44
  -1  -2   3   75.76    3.45
   1  -2  -3   74.32    3.78
  -1   2   3   77.60    4.33
   1   2  -3   73.88    3.54
   1   2  -3   79.32    3.35
  -1  -2   3   77.77    3.63
  -1  -2   3   71.52    3.07
  -1   2   3   80.50    3.29
   1   2  -3   79.42    3.81
   1  -2  -3   63.09    2.90
  -1   2   3   76.99    3.34
   1  -2  -3   68.35    3.12
  -1  -2   3   75.06    3.17
  -1  -2  -3    8.88    1.80
  -1  -2  -3   10.11    1.67
   1   2   3    9.65    1.67
  -1   2  -3    7.69    1.73
   1   2   3    6.65    1.59
   1   2   3    8.49    1.20
  -1   2  -3    8.01    1.17
   1  -2   3    8.60    1.02
   1   2   3    8.45    2.87
  -1  -2  -3    6.01    2.18
  -1   2  -3    9.06    1.70
  -1  -2  -3    7.66    1.37
   1  -2   3    9.57    1.13
  -1   2  -3    7.32    1.10
  -3   1   2   29.99    1.88
  -3  -1   2   31.69    2.10
  -3  -1   2   31.63    1.84
   3  -1  -2   30.09    2.04
  -3   1   2   35.37    2.53
  -3  -1   2   27.03    2.20
   3   1  -2   31.53    2.66
   3  -1  -2   29.79    2.42
  -3   1   2   31.81    1.99
   3  -1  -2   34.65    2.53
   3  -1  -2   31.82    2.04
   3   1  -2   32.23    2.40
   3   1  -2   32.28    1.89
   2   2   0    3.94    2.02
  -2   2   0    3.56    1.41
  -2  -2   0    4.89    1.60
   2  -2   0    5.29    1.33
  -2  -2   0    5.06    0.98
   2  -2   0    4.06    1.20
  -2   2   0    5.24    1.04
  -2   2   0    5.81    1.38
   2   2   0    5.26    1.89
   2  -2   0    5.12    1.50
  -2   2   0    3.93    1.21
  -2  -2   0    4.52    1.40
   2  -2   0    4.94    1.06
   2   2   0    4.30    1.21
   3   1   2   14.68    2.61
  -3   1  -2   17.29    2.33
  -3  -1  -2   14.75    1.64
  -3   1  -2   14.17    1.79
   3   1   2   15.50    1.36
  -3  -1  -2   15.84    2.05
   3  -1   2   14.05    1.76
   3  -1   2   17.35    1.26
   3  -1   2   12.89    1.29
  -3   1  -2   14.12    1.43
  -3  -1  -2   14.94    2.20
  -2   2   1   41.77    2.06
  -2   2   1   46.08    2.65
   2   2  -1   41.43    2.74
  -2   2   1   48.48    3.12
   2   2  -1   40.79    2.13
   2  -2  -1   39.49    2.22
  -2  -2   1   40.17    2.34
   2  -2  -1   44.36    2.71
  -2  -2   1   41.82    2.11
   2  -2  -1   37.61    2.03
   2  -2  -1   38.34    2.14
  -2   2   1   36.19    2.05
   2   2  -1   45.23    2.89
  -2   2  -1   20.47    1.63
  -2  -2  -1   18.95    2.20
   2  -2   1   19.27    1.90
  -2  -2  -1   17.52    1.47
   2   2   1   17.49    2.33
  -2   2  -1   19.72    1.39
  -2  -2  -1   20.68    1.45
   2  -2   1   16.60    1.43
  -2  -2  -1   18.13    1.71
   2   2   1   19.44    1.64
   2  -2   1   22.31    1.57
   2   2   1   18.91    2.15
  -2   2  -1   16.42    1.50
  -2   2  -1   16.53    1.65
   0   1   6   39.32    2.19
   0  -1  -6   40.39    2.43
   0   1  -6   39.42    2.58
   0  -1   6   39.20    2.19
   0  -1  -6   43.23    2.33
   0   1   6   37.18    2.70
   0   1   6   40.25    2.04
   0  -1  -6   39.46    2.04
   0   1  -6   37.33    2.16
   0   1  -6   39.10    1.89
   0   2  -4   71.75    3.43
   0   2   4   80.18    3.87
   0   2   4   79.06    3.20
   0   2   4   80.13    4.29
   0  -2   4   69.38    2.91
   0  -2  -4   73.94    3.95
   0  -2  -4   80.44    3.32
   0  -2   4   71.73    3.33
   0   2  -4   77.39    3.66
   0   2   4   76.44    3.32
  -2   1   5   86.21    3.88
   2   1  -5   81.45    3.89
  -2  -1   5   82.90    3.75
  -2  -1   5   81.01    3.34
   2   1  -5   89.36    3.37
   2  -1  -5   83.14    3.55
   2  -1  -5   87.15    3.54
  -2   1   5   81.98    3.46
   2  -1  -5   73.35    3.51
  -2   1   5   82.88    3.25
   2  -1  -5   78.95    5.04
   2   1  -5   79.33    3.31
   2  -2  -2  127.73    4.86
  -2  -2   2  115.91    4.47
  -2  -2   2  132.02    4.81
   2   2  -2  132.80    5.21
  -2   2   2  124.32    4.86
  -2   2   2  127.57    4.80
  -2   2   2  133.97    4.99
  -2  -2   2  136.39    5.48
   2  -2  -2  140.50    5.65
   2  -2  -2  130.08    5.30
   2   2  -2  143.00    5.68
   2   2  -2  123.13    5.04
   2  -2  -2  130.18    5.16
  -2   2   2  130.37    5.60
  -2  -2   2  125.31    4.85
   2   2   2   45.24    2.78
  -2  -2  -2   40.44    2.37
  -2   2  -2   34.04    1.89
   2  -2   2   35.13    1.86
  -2  -2  -2   40.25    1.98
  -2   2  -2   39.45    2.32
  -2   2  -2   42.60    2.25
  -2   2  -2   42.15    2.04
  -2  -2  -2   37.31    2.70
  -2  -2  -2   44.92    2.78
   2   2   2   44.21    3.38
   2  -2   2   36.49    2.96
  -2  -2  -2   43.44    2.33
   2   2   2   38.22    2.04
   2  -1   5   50.80    2.37
  -2   1  -5   47.52    2.20
  -2  -1  -5   47.34    2.74
  -2   1  -5   50.09    2.26
  -2  -1  -5   49.27    2.33
  -2  -1  -5   48.79    2.73
  -2   1  -5   48.29    3.46
   2  -1   5   54.98    2.98
  -2  -1  -5   49.64    3.22
  -2   1  -5   45.27    2.61
  -2  -1  -5   46.22    2.28
   2   1   5   47.19    2.30
   3   0  -4    5.04    1.31
   3   0  -4    4.93    1.79
  -3   0   4    3.38    1.49
   3   0  -4    5.03    1.01
  -3  -1   3   24.50    1.63
   3   1  -3   22.99    1.66
  -3  -1   3   23.01    1.86
   3   1  -3   23.84    2.02
  -3  -1   3   25.65    2.24
   3  -1  -3   18.39    1.34
  -3   1   3   26.44    1.66
   3  -1  -3   24.93    1.88
   3   1  -3   23.69    2.30
  -3   1   3   25.97    2.18
  -3   1   3   25.51    1.83
   1  -1  -6   52.22    3.56
  -1  -1   6   65.12    3.11
  -1  -1   6   65.15    2.87
   1  -1  -6   61.42    2.86
   1  -1  -6   59.62    4.28
   1   1  -6   67.14    2.70
  -1   1   6   64.72    2.96
   1   1  -6   63.13    2.87
   1   1  -6   59.71    3.19
   3   1   3   24.14    1.53
   3   1   3   24.66    1.79
  -3   1  -3   28.08    2.43
   3   1   3   27.00    2.86
  -3  -1  -3   27.79    2.33
  -3  -1  -3   25.18    2.56
   3  -1   3   25.71    1.58
  -3   1  -3   24.75    1.70
   3  -1   3   25.88    1.98
  -3   1  -3   23.93    2.05
  -3  -1  -3   24.12    1.65
   1   1   6   22.70    1.79
  -1   1  -6   22.62    1.56
  -1  -1  -6   20.86    1.53
   1   1   6   22.05    1.52
  -1   1  -6   22.11    2.00
   1   1   6   23.54    2.48
  -1   1  -6   23.04    1.37
  -1  -1  -6   22.90    2.64
  -1  -1  -6   22.56    1.82
  -1   1  -6   22.64    1.78
  -1  -1  -6   22.73    2.04
   1  -1   6   23.39    1.42
  -1   1  -6   21.64    1.87
  -3   0  -4   80.86    3.34
  -3   0  -4   87.30    3.42
   3   0   4   86.60    4.13
  -3   0  -4   88.26    4.42
   3   0   4   84.21    3.67
  -3   0  -4   85.58    3.92
   1   2  -4    4.62    1.11
   1   2  -4    5.62    1.70
   1  -2  -4    4.64    1.90
  -1   2   4    2.43    2.14
  -1  -2   4    5.25    1.21
  -1   2   4    3.42    0.97
   1  -2  -4    4.65    1.14
  -1  -2   4    5.52    1.27
  -1  -2   4    5.74    1.50
  -1   2   4    3.79    1.29
   1   2  -4    3.64    1.48
   1  -2   4    4.35    0.87
  -1   2  -4    4.41    1.54
  -1   2  -4    4.00    1.78
   1  -2   4    5.51    1.58
   1   2   4    4.81    1.19
  -1  -2  -4    3.74    1.04
   1   2   4    3.88    1.44
  -1  -2  -4    5.37    1.53
  -1   2  -4    3.70    1.55
   1   2   4    3.24    2.31
   1   2   4    4.45    1.42
  -1   2  -4    3.52    1.03
   1  -2   4    4.96    1.47
  -1  -2  -4    4.24    1.89
   0   0   7   -0.04    0.90
   0   0   7    0.07    0.99
   0   0  -7   -1.11    1.50
   0   0  -7   -2.54    1.80
   0   0   7   -0.54    1.50
   0   0  -7    0.20    1.02
   0   0   7    0.74    1.19
   0   0  -7    0.66    1.39
   2   0  -6   10.16    1.54
   2   0  -6    7.22    1.54
   2   0  -6   10.86    1.15
  -2   0   6   11.35    1.43
   2   0  -6    9.24    1.77
  -2   0  -6    0.66    1.26
   2   0   6    0.77    1.07
   2   0   6    1.08    0.89
  -2   0  -6    0.36    0.80
  -2   0  -6    1.43    0.90
  -2   0  -6   -0.94    1.85
  -2   0  -6    0.97    1.47
   2   2  -3    6.13    1.03
  -2  -2   3    7.51    1.69
  -2   2   3    5.63    1.44
  -2   2   3    5.62    0.97
  -2  -2   3    5.66    1.47
  -2   2   3    6.16    1.38
   2   2  -3    5.87    1.69
  -2  -2   3    6.61    1.08
   2  -2  -3    5.90    1.69
   2  -2  -3    4.48    1.74
   2  -2  -3    3.70    0.97
  -2   2   3    3.83    1.97
  -2  -2   3    7.42    1.51
  -2  -2  -3   38.60    2.57
  -2  -2  -3   38.09    2.16
   2  -2   3   29.34    1.95
  -2   2  -3   36.49    2.47
   2   2   3   39.40    3.31
  -2   2  -3   29.70    1.89
  -2   2  -3   37.71    2.16
  -2   2  -3   37.88    2.39
  -2  -2  -3   41.59    2.94
   2   2   3   30.55    2.35
   2   2   3   39.49    2.34
   2  -2   3   29.74    2.03
  -2  -2  -3   35.09    2.77
  -2  -2  -3   39.12    2.40
   2  -2   3   35.27    2.08
   1   0  -7    9.58    1.16
  -1   0   7   12.20    1.23
   1   0  -7   11.99    1.89
   1   0  -7   10.63    1.59
  -1   0   7   11.07    1.13
  -1   0   7   11.45    1.34
  -1   0  -7   64.73    3.82
  -1   0  -7   63.60    3.46
  -1   0  -7   70.23    3.62
   1   0   7   70.17    3.62
  -1   0  -7   64.80    3.26
   1   0   7   66.29    3.58
   1   0   7   65.84    3.30
   1   0   7   68.54    3.85
  -3   1   4   65.80    3.71
  -3   1   4   64.26    3.34
   3  -1  -4   49.90    3.74
   3   1  -4   59.45    3.18
   3  -1  -4   56.60    3.11
  -3  -1   4   58.21    3.09
  -3   1   4   59.95    3.23
   3   1  -4   62.77    3.76
   3   1  -4   57.26    3.35
   0  -2   5   24.77    1.67
   0  -2  -5   28.76    2.82
   0   2  -5   26.68    2.22
   0  -2  -5   30.74    2.27
   0   2   5   28.30    3.02
   0   2   5   27.44    1.81
   0   2   5   28.94    2.09
   0  -2   5   25.15    2.00
   0   2  -5   25.30    2.30
   0   2  -5   28.78    1.89
   0   2  -5   21.86    1.95
   0  -2  -5   27.00    1.88
  -3  -1  -4   46.79    3.50
   3  -1   4   46.95    2.51
  -3  -1  -4   47.21    2.54
  -3   1  -4   44.17    2.50
   3   1   4   42.66    2.73
  -3  -1  -4   43.48    2.76
   3  -1   4   46.97    2.83
  -3  -1  -4   47.42    3.09
  -3   1  -4   43.53    2.87
  -3  -1  -4   45.77    2.64
   3   1   4   45.11    2.67
  -3   1  -4   44.36    2.61
  -3   1  -4   47.73    3.14
   3   1   4   47.46    3.58
  -4   0   0   27.85    2.22
   4   0   0   30.20    2.67
   4   0   0   30.60    2.01
  -4   0   0   31.89    2.58
   4   0   0   29.94    2.44
  -4   0   0   29.37    1.93
   4   0  -1    1.02    1.47
   4   0  -1    2.24    1.12
  -4   0   1    2.34    1.05
  -4   0   1    4.17    1.70
   4   0  -1    2.11    1.62
  -4   0   1    1.99    1.21
  -3   0   5   15.17    1.45
   3   0  -5   16.12    1.70
   3   0  -5   11.91    1.81
  -3   0   5   13.79    1.78
   3   0  -5   17.67    1.40
  -4   0  -1   15.59    1.91
   4   0   1   14.11    1.91
  -4   0  -1   12.66    1.76
   4   0   1   14.30    1.36
  -4   0  -1   15.91    1.46
   4   0   1   16.80    2.16
  -3   0  -5   -0.09    0.90
  -3   0  -5    0.21    1.77
  -3   0  -5    0.30    1.46
   3   0   5   -0.19    1.15
  -3   0  -5    0.47    0.85
   3   0   5    0.10    1.84
   0  -1  -7   64.07    3.21
   0   1   7   57.44    2.95
   0   1  -7   71.12    3.52
   0   1  -7   69.77    3.94
   0   1  -7   77.79    4.10
   0  -1   7   69.12    3.61
   0   1   7   76.33    4.47
   0  -1  -7   63.17    3.60
   0  -1  -7   70.30    3.74
   0   1  -7   69.61    3.65
  -2   1   6   24.76    1.82
  -2  -1   6   19.66    1.85
   2   1  -6   21.77    1.79
   2  -1  -6   19.59    1.78
   2  -1  -6   21.26    2.70
   2  -1  -6   20.40    1.61
   2   1  -6   18.59    2.07
  -2  -1   6   21.49    1.66
  -2   1   6   20.16    1.78
  -2   1   6   15.45    2.32
   2  -1  -6   15.99    1.95
   2   1  -6   17.88    1.28
  -1   2   5   86.46    4.34
   1   2  -5   81.26    4.42
   1   2  -5   77.77    4.01
   1   2  -5   78.73    4.16
  -1   2   5   72.79    3.81
  -1  -2   5   75.31    3.93
  -1   2   5   81.13    4.94
   1  -2  -5   84.88    4.11
  -1  -2   5   80.99    4.30
   1   2   5  161.95    8.67
  -1  -2  -5  140.09    6.58
  -1   2  -5  151.66    8.38
   1   2   5  131.98    8.96
  -1   2  -5  141.84    6.60
  -1   2  -5  140.62    6.40
  -1   2  -5  143.42    6.39
   1  -2   5  150.47    6.80
   1   2   5  153.49    8.81
  -2   1  -6   17.76    1.86
  -2  -1  -6   17.66    1.75
   2   1   6   17.01    1.40
  -2   1  -6   20.09    1.48
  -2  -1  -6   18.48    2.38
  -2  -1  -6   20.32    1.96
  -2  -1  -6   18.49    1.49
  -2   1  -6   19.84    1.84
   2   1   6   22.28    1.96
  -2   1  -6   17.50    1.76
  -2   1  -6   18.64    1.48
   2  -1   6   19.81    1.46
   2  -2  -4   24.91    2.34
  -2   2   4   21.56    1.77
  -2   2   4   28.77    1.86
  -2  -2   4   27.20    2.01
  -2  -2   4   29.05    1.87
   2   2  -4   25.37    1.70
   2  -2  -4   30.14    2.63
  -2  -2   4   30.83    2.40
  -2   2   4   25.31    1.83
  -2   2   4   23.19    2.84
   2   2  -4   28.96    2.44
   2  -2  -4   20.21    1.53
  -4   0   2   10.63    1.67
   4   0  -2   15.79    1.29
   4   0  -2   13.34    1.62
   4   0  -2   15.99    1.58
  -2  -2  -4   30.24    2.03
   2  -2   4   32.10    1.89
  -2   2  -4   27.20    1.75
  -2  -2  -4   26.81    2.55
   2   2   4   33.80    3.46
  -2   2  -4   32.92    2.12
  -2  -2  -4   33.18    2.53
   2   2   4   29.95    2.52
   4   0   2  111.23    5.53
  -4   0  -2  103.89    5.30
   4   0   2  120.62    6.17
   4   0   2  109.67    5.10
  -4   0  -2  119.61    5.60
  -4   0  -2  118.86    6.03
  -3   2   0   78.53    3.86
   3   2   0   75.33    3.79
   3   2   0   71.58    4.11
  -3  -2   0   80.63    4.29
  -3  -2   0   63.02    3.66
  -3  -2   0   88.32    4.44
  -3  -2   0   77.87    3.95
   3  -2   0   71.75    3.95
  -3   2   0   73.80    3.76
  -3   2   0   82.08    3.97
  -3   2   0   79.89    4.30
   3  -2   0   71.99    3.63
  -3   2   1  116.77    6.19
  -3  -2   1  133.36    6.37
   3   2  -1  124.27    6.29
  -3   2   1  120.48    7.02
  -3   2   1  124.58    6.06
  -3  -2   1  138.54    6.37
   3  -2  -1  115.40    5.83
  -3   2   1  127.65    6.00
   3  -2  -1  113.19    5.33
   3   2  -1  122.55    6.34
   1   1  -7    9.63    1.43
   1   1  -7   10.23    1.77
   1  -1  -7    5.85    1.10
   1  -1  -7    6.80    2.43
   1  -1  -7    6.33    2.47
  -1   1   7    6.55    3.01
  -1  -1   7   11.66    1.62
   1  -1  -7    7.06    2.05
  -1  -1   7   10.73    1.27
   1   1  -7   11.18    1.12
  -1   1   7   10.68    1.27
  -3  -2  -1    1.41    1.18
  -3  -2  -1    1.64    1.41
  -3   2  -1    0.93    1.21
   3   2   1    0.75    0.94
  -3  -2  -1    1.59    0.82
   3  -2   1    1.67    1.02
  -3   2  -1    1.64    1.02
   3   2   1    1.45    1.47
  -3  -2  -1   -0.56    1.41
   3   2   1    0.10    1.13
   3  -2   1    1.43    1.25
  -3   2  -1    1.37    0.74
  -3   2  -1    0.76    0.77
  -1  -1  -7   47.04    2.84
  -1   1  -7   44.98    2.82
  -1  -1  -7   36.80    2.34
  -1   1  -7   46.30    2.73
   1   1   7   42.63    2.34
  -1  -1  -7   47.05    2.58
   1  -1   7   46.48    2.47
  -1   1  -7   47.64    2.59
   1   1   7   38.29    2.33
  -1   1  -7   47.90    2.99
   1   1   7   44.53    3.20
  -1  -1  -7   41.72    3.11
   1   1   7   45.36    2.79
  -4   1   0  121.53    5.64
  -4   1   0  133.35    6.50
   4  -1   0  117.66    5.59
   4   1   0  142.55    7.03
   4   1   0  114.89    5.46
  -4  -1   0  135.61    6.23
  -4  -1   0  137.57    6.57
   4  -1   0  121.43    6.00
  -4  -1   0  155.13    8.56
  -4  -1   1  153.03    8.09
   4   1  -1  137.05    6.68
  -4   1   1  157.56    8.77
   4  -1  -1  125.03    5.98
   4  -1  -1  145.60    6.73
  -4  -1   1  136.16    6.52
   4   1  -1  150.38    7.27
  -4  -1   1  164.73    9.00
   4  -1  -1  153.29    8.52
   4   1  -1  152.53    8.12
  -4   1   1  154.49    8.18
  -3   1   5   75.60    4.49
   3   1  -5   86.96    4.51
  -3   1   5   92.79    4.56
   3  -1  -5   87.00    4.36
   3   1  -5   69.81    3.39
  -3   1   5   85.13    4.21
   3   1  -5   71.01    4.04
  -3  -1   5   85.18    4.16
   3   1  -5   82.10    4.06
   4  -1   1    7.90    0.92
  -4   1  -1    9.22    1.29
  -4   1  -1    7.21    1.56
  -4  -1  -1    6.97    1.63
   4  -1   1   10.11    1.73
  -4   1  -1    6.02    2.44
   4   1   1    9.99    2.21
   4   1   1    9.51    1.10
  -4  -1  -1    9.56    1.51
  -4  -1  -1    7.22    1.66
  -3  -2   2  113.96    5.53
   3   2  -2   97.60    4.93
   3   2  -2   84.78    4.58
  -3   2   2   82.56    5.21
  -3   2   2  109.84    5.20
  -3  -2   2  109.22    5.14
   3   2  -2  119.39    6.01
  -3   2   2   96.34    4.79
   3  -2  -2   96.81    6.04
   3  -2  -2  105.82    5.12
  -3   2   2  101.66    4.94
  -2   0   7    5.38    1.12
   2   0  -7    2.59    1.78
   2   0  -7    3.31    0.89
   2   0  -7    4.48    1.41
   2   0  -7    6.48    1.62
  -3  -2  -2   11.28    1.34
  -3   2  -2   11.06    1.46
  -3  -2  -2   10.38    1.74
   3  -2   2   10.97    1.52
  -3   2  -2    8.83    1.19
  -3  -2  -2   12.28    1.26
  -3  -2  -2   10.04    1.46
  -3   2  -2   11.04    1.00
  -3   2  -2   10.39    1.06
   3   2   2   11.93    1.43
  -3  -2  -2    8.28    1.64
   3  -2   2    9.60    1.17
   3   2   2    9.92    1.72
   4   0  -3    2.16    1.24
  -4   0   3    0.68    1.49
   4   0  -3    0.83    1.09
  -3  -1  -5   66.65    3.32
   3  -1   5   71.88    3.49
  -3  -1  -5   74.46    3.74
  -3   1  -5   71.91    3.59
  -3  -1  -5   77.55    4.23
   3   1   5   71.80    3.70
  -3   1  -5   72.40    4.01
   3   1   5   79.08    4.20
  -3  -1  -5   76.38    4.62
   3   1   5   73.32    4.52
  -3   1  -5   71.43    3.58
  -3   1  -5   71.56    3.94
  -3  -1  -5   75.47    4.09
   3  -1   5   78.40    3.98
   0  -3   0   -0.34    0.92
   0  -3   0    0.20    1.14
   0   3   0   -0.51    1.32
   0  -3   0   -0.27    0.87
   0   3   0    1.71    1.72
   0   3   0   -0.51    0.89
   0  -3   0   -0.22    1.21
   0   3   0   -0.10    0.97
  -2   0  -7   96.61    4.80
  -2   0  -7  103.24    5.06
  -2   0  -7   98.93    5.25
  -2   0  -7   99.54    4.61
   2   0   7  109.75    5.20
   2   0   7   98.41    4.66
  -2   0  -7   98.19    4.62
  -4   0  -3    0.70    1.44
  -4   0  -3    5.02    1.89
   4   0   3    0.67    1.74
  -4   0  -3    0.91    1.18
   4   0   3    0.37    0.86
   4   0   3    0.49    1.41
  -4   0  -3    1.50    1.11
   0  -3  -1    2.58    1.21
   0  -3   1    3.55    0.99
   0  -3  -1    2.08    0.97
   0   3  -1    4.19    0.98
   0   3   1    3.32    1.04
   0   3  -1    3.47    1.32
   0  -3   1    3.99    1.04
   0  -3  -1    3.56    1.49
   0   3   1    2.84    1.23
   0   3  -1    3.37    1.05
   0   3   1    3.29    1.78
   0   3  -1    3.26    1.52
   0  -3   1    3.97    1.34
   0  -3  -1    3.44    1.12
   0  -3   1    3.19    1.29
   0   3   1    4.12    1.19
   0   2  -6   12.82    1.12
   0  -2  -6   14.22    2.45
   0   2   6   13.18    2.57
   0   2  -6   11.63    1.62
   0   2  -6   12.75    1.32
   0  -2  -6   16.22    1.75
   0   2   6   10.05    1.38
   0  -2   6   11.72    1.22
   0   2  -6   12.37    1.05
   0   2   6   11.13    1.48
   0  -2  -6   11.76    1.25
   0  -2   6   13.26    1.63
   0   0  -8   75.14    4.16
   0   0  -8   70.75    3.71
   0   0   8   75.32    3.72
   0   0   8   75.55    3.67
   0   0  -8   75.18    4.08
   0   0   8   72.78    3.77
   0   0  -8   64.15    3.25
   4  -1  -2   64.37    3.38
   4   1  -2   60.42    3.54
   4   1  -2   64.55    3.35
  -4  -1   2   57.15    3.60
  -4   1   2   60.72    3.23
   4  -1  -2   65.29    3.88
  -4  -1   2   59.02    3.08
  -4   1   2   61.58    3.91
  -4  -1   2   57.52    3.22
   4   1  -2   63.98    3.80
   4  -1  -2   60.38    3.65
  -4   1  -2    2.19    1.56
  -4  -1  -2    1.20    1.12
   4  -1   2    2.04    1.20
  -4  -1  -2    1.77    1.59
  -4  -1  -2    2.60    1.62
  -4   1  -2    0.70    1.41
   4   1   2    3.20    2.05
   4   1   2    1.41    0.89
  -4   1  -2    1.10    1.00
   4  -1   2    0.84    0.74
   4   1   2    1.04    1.41
   3   0  -6    2.02    1.34
  -3   0   6    3.67    1.39
   3   0  -6    2.88    0.84
   3   0  -6    2.42    1.57
  -3   0   6    4.14    1.18
   3   0  -6    4.72    1.20
  -2   2   5   31.40    2.21
   2   2  -5   23.08    1.63
  -2  -2   5   23.98    1.66
  -2   2   5   23.29    1.77
  -2  -2   5   25.49    2.16
   2   2  -5   23.10    2.20
  -2   2   5   18.99    1.43
  -2   2   5   16.50    2.41
   2  -2  -5   25.24    2.57
  -1  -3   0   10.68    1.37
  -1   3   0    8.23    1.32
   1   3   0    8.04    1.10
  -1   3   0    6.11    0.94
  -1   3   0    6.90    1.13
   1  -3   0    8.38    1.33
  -1  -3   0    9.16    1.63
   1  -3   0    8.24    1.42
   1   3   0    9.97    1.80
   1   3   0    6.24    1.80
  -1   3   0    9.32    1.85
   1  -3   0    7.22    1.04
   1  -3   0    7.37    1.18
  -1  -3   0    9.37    1.24
   2  -2   5    6.63    0.89
  -2  -2  -5    5.68    1.44
   2   2   5    6.53    1.50
   2   2   5    8.10    1.57
  -2   2  -5    5.73    0.97
  -2  -2  -5    6.11    1.13
   2   2   5    6.39    2.26
  -2  -2  -5    5.72    1.96
   0   3  -2   28.92    2.33
   0   3   2   31.02    2.08
   0  -3  -2   29.56    2.16
   0   3   2   24.82    2.10
   0  -3  -2   33.50    2.79
   0   3   2   30.13    2.30
   0  -3   2   32.30    2.39
   0  -3  -2   35.31    2.78
   0  -3   2   34.40    2.59
   0   3   2   24.40    2.67
   0   3  -2   33.53    2.30
   0  -3  -2   26.95    2.06
   0   3  -2   36.76    2.76
   0  -3   2   38.77    2.54
   0   3  -2   35.30    2.85
   0  -3   2   34.67    2.50
  -3   2   3   35.45    2.24
  -3  -2   3   33.57    2.44
   3   2  -3   41.99    2.95
  -3   2   3   30.20    2.23
   3  -2  -3   27.80    2.46
  -3   2   3   31.66    2.25
  -3  -2   3   41.71    3.05
  -3  -2   3   40.11    2.54
  -3  -2   3   38.25    2.44
   3   2  -3   37.86    2.28
   3   2  -3   42.09    3.09
  -3   0  -6    9.35    1.97
  -3   0  -6    9.96    1.66
  -3   0  -6   10.50    1.20
  -3   0  -6   10.12    1.74
   3   0   6    9.59    1.83
  -3   0  -6    9.73    1.17
   3   0   6    8.05    1.19
   3   0   6   11.01    1.50
   1  -2  -6   63.83    4.72
   1  -2  -6   66.42    3.77
  -1   2   6   64.72    3.83
  -1   2   6   70.32    4.18
  -1  -2   6   71.41    4.31
   1   2  -6   60.99    3.91
  -1   2   6   67.24    4.00
   1   2  -6   72.43    4.44
   1   2  -6   64.73    3.74
   1  -2  -6   65.52    4.17
  -1   3   1   37.77    2.57
   1  -3  -1   41.78    2.76
  -1  -3   1   42.89    2.73
   1  -3  -1   44.45    2.99
   1   3  -1   38.66    2.55
   1   3  -1   46.91    3.49
   1  -3  -1   34.19    2.57
  -1   3   1   42.44    3.01
  -1  -3   1   40.75    2.64
   1   3  -1   37.48    2.94
  -1  -3   1   31.51    2.40
   1  -3  -1   49.59    3.10
  -1   3   1   44.69    2.76
  -1  -3   1   42.90    2.75
  -1   3   1   43.18    3.32
  -1   0   8   38.71    2.59
   1   0  -8   42.11    2.86
  -1   0   8   40.20    2.46
  -1   0   8   41.82    2.61
   1   0  -8   36.38    2.76
   1   0  -8   30.41    3.04
   1  -3   1   14.12    1.36
  -1  -3  -1   13.31    1.43
  -1  -3  -1   13.56    1.47
   1   3   1   14.71    1.52
  -1   3  -1   13.58    1.42
  -1   3  -1   14.23    1.33
   1   3   1   18.82    1.61
  -1   3  -1   16.25    1.95
   1   3   1   15.45    2.25
   1  -3   1   16.34    1.46
   1   3   1   17.73    2.08
  -1   3  -1   16.46    1.58
  -1  -3  -1   10.90    1.60
   1  -3   1   13.32    1.63
   1  -3   1   16.40    1.64
  -3   2  -3   28.95    2.22
  -3  -2  -3   36.52    2.51
  -3   2  -3   31.71    2.05
  -3  -2  -3   29.80    2.61
  -3  -2  -3   27.99    2.40
  -3  -2  -3   36.11    2.35
   3  -2   3   34.33    2.92
  -3  -2  -3   30.84    2.36
  -3   2  -3   30.12    2.11
   3  -2   3   32.39    2.14
   3   2   3   29.18    2.58
  -1   2  -6  112.15    5.96
  -1   2  -6  116.15    6.20
  -1   2  -6  108.57    5.96
   1   2   6   99.84    5.60
   1   2   6  102.65    6.83
  -1   2  -6  108.68    6.37
  -1  -2  -6   90.48    6.75
   1   2   6  113.10    6.76
  -1  -2  -6  118.09    6.36
  -1   0  -8  171.87    7.94
  -1   0  -8  163.93    8.99
   1   0   8  171.32    8.19
  -1   0  -8  160.97    8.62
   1   0   8  167.89    7.88
   1   0   8  168.97    7.82
  -1   0  -8  163.42    8.55
   1   0   8  162.68    8.49
   2  -1  -7    0.92    1.99
   2   1  -7    0.89    0.69
  -2   1   7    1.07    1.12
   2  -1  -7    0.17    1.22
  -2  -1   7    1.19    1.43
  -2   1   7    0.69    1.46
   2  -1  -7    0.97    1.52
   2   1  -7    0.82    1.17
   2   1  -7    1.25    1.50
  -2  -1   7    0.90    0.94
   4   0  -4   35.29    2.55
   4   0  -4   27.04    2.43
   4   0  -4   41.64    2.73
  -4   0   4   35.87    2.41
  -4   0   4   38.43    2.88
  -4  -1   3    5.78    1.18
   4  -1  -3    9.25    2.45
   4  -1  -3    3.85    1.30
   4  -1  -3    4.55    0.96
   4   1  -3    5.65    1.49
  -4  -1   3    4.51    1.24
  -4  -1   3    5.04    1.61
   4  -1  -3    4.79    1.57
   4  -1  -3    3.55    1.54
  -4   1   3    4.45    1.44
   4   1  -3    3.86    1.65
  -4   1   3    5.08    1.19
   4   1  -3    5.30    1.28
   2   1   7   20.15    2.43
  -2   1  -7   23.19    2.27
  -2   1  -7   22.73    1.94
   2   1   7   18.49    1.50
  -2  -1  -7   22.25    1.93
   2   1   7   22.48    1.86
   2   1   7   21.29    1.94
  -2  -1  -7   21.54    1.69
  -2   1  -7   21.51    1.96
   2  -1   7   21.73    1.58
  -2   1  -7   23.00    1.66
  -2  -1  -7   19.05    2.45
  -2  -1  -7   20.79    1.95
   1  -3  -2   57.00    3.98
  -1  -3   2   68.32    3.94
   1   3  -2   75.47    4.40
  -1  -3   2   65.67    4.13
  -1  -3   2   62.08    3.64
   1   3  -2   66.22    4.21
  -1   3   2   71.77    4.08
  -1   3   2   65.43    3.90
  -1   3   2   52.80    3.77
   1   3  -2   57.46    3.75
   1  -3  -2   61.80    3.70
   1  -3  -2   61.72    3.82
  -1   3   2   68.88    4.38
  -4   1  -3   72.90    4.53
   4   1   3   80.62    5.08
   4  -1   3   77.74    4.60
  -4   1  -3   70.11    4.01
   4  -1   3   82.32    4.54
   4   1   3   70.40    3.97
  -4   1  -3   91.28    5.58
  -4  -1  -3   85.40    4.86
   4   1   3   75.02    4.69
  -4  -1  -3   82.43    5.09
  -4  -1  -3   72.17    4.72
   1  -3   2   70.66    4.26
   1   3   2   73.36    4.88
  -1   3  -2   72.07    4.42
  -1  -3  -2   53.98    4.03
  -1   3  -2   65.22    3.84
   1   3   2   66.77    4.09
   1  -3   2   66.30    3.97
   1  -3   2   63.88    3.78
  -1   3  -2   61.25    3.60
   1   3   2   73.73    4.19
   1  -3   2   55.45    3.23
  -1   3  -2   61.37    3.64
  -1  -3  -2   64.57    4.05
   4   0   4    0.30    1.28
  -4   0  -4    0.01    1.02
   4   0   4   -0.01    1.65
  -4   0  -4   -0.51    1.68
  -4   0  -4   -0.24    1.38
  -4   0  -4    0.10    0.91
   0  -1   8   39.79    2.62
   0   1   8   40.76    3.16
   0   1  -8   37.45    2.57
   0  -1  -8   35.76    2.29
   0   1   8   34.23    2.21
   0   1  -8   41.09    2.84
   0   1  -8   39.13    2.87
   0  -1   8   39.50    2.41
   0  -1   8   41.01    2.49
   0   1   8   35.54    2.49
   0   1  -8   39.04    2.47
   0  -1  -8   40.53    2.80
   0   3   3   37.63    3.38
   0  -3  -3   28.55    2.45
   0   3  -3   31.25    2.46
   0  -3  -3   31.55    2.77
   0  -3   3   35.85    2.52
   0   3   3   34.13    2.86
   0   3   3   31.30    2.24
   0  -3  -3   31.76    2.25
   0   3  -3   40.17    2.97
   0  -3   3   38.89    2.51
   0   3   3   27.75    1.94
   0  -3   3   39.50    2.78
   0   3  -3   38.17    2.51
   3   1  -6    8.94    1.57
   3   1  -6    8.15    1.28
   3  -1  -6    7.98    1.93
  -3   1   6    7.30    1.16
   3  -1  -6    9.72    1.26
  -3  -1   6    9.55    1.65
   3   1  -6    8.39    0.96
   3  -1  -6    5.97    1.85
   3  -1  -6    8.70    1.41
   3   1  -6    7.35    1.78
  -3  -1   6    8.75    1.25
  -3   1   6    7.05    1.22
   3   2  -4    5.99    1.68
  -3   2   4    4.43    1.10
  -3   2   4    4.90    0.92
  -3   2   4    3.62    1.64
   3  -2  -4    6.36    1.60
  -3  -2   4    7.51    1.74
   3   2  -4    4.71    1.01
   3   2  -4    6.69    1.65
  -3  -2   4    5.89    0.98
  -3   2   4    5.05    1.15
   3  -2  -4    4.03    1.56
  -3   1  -6   51.43    3.03
   3   1   6   54.00    3.86
  -3  -1  -6   49.37    3.31
  -3  -1  -6   52.43    3.18
  -3   1  -6   51.26    3.03
  -3   1  -6   53.20    3.58
  -3   1  -6   51.96    3.40
   3   1   6   50.67    3.11
   3  -1   6   56.23    3.37
  -3  -1  -6   52.03    3.37
  -3  -1  -6   50.23    2.96
   3  -1   6   51.77    3.01
  -3  -1  -6   56.19    4.00
   3   1   6   53.24    3.43
  -1  -1   8  110.85    6.16
   1  -1  -8  106.13    6.09
   1   1  -8  100.82    5.39
   1   1  -8  106.39    5.86
   1  -1  -8  118.01    6.35
  -1   1   8   87.69    4.80
  -1   1   8  115.34    6.60
   1  -1  -8  105.00    5.83
  -1  -1   8  104.98    5.75
   1   1  -8   97.92    5.67
  -3  -2  -4    5.92    1.57
  -3  -2  -4    6.15    1.54
  -3  -2  -4    5.64    0.97
  -3  -2  -4    6.08    1.74
  -3   2  -4    6.64    1.34
  -3  -2  -4    5.73    1.12
  -3   2  -4    6.75    0.92
  -3   2  -4    5.54    1.03
   3  -2   4    6.23    0.95
   1   1   8  119.22    6.48
   1  -1   8   99.80    5.55
   1   1   8  104.48    5.64
  -1   1  -8  105.38    5.91
  -1  -1  -8  104.24    5.64
   1  -1   8  104.91    5.67
  -1   1  -8   98.31    5.59
  -1  -1  -8  105.36    5.90
  -1  -1  -8  100.67    6.05
  -1   1  -8  103.06    5.72
  -1   1  -8  105.73    5.72
   1   1   8  104.78    6.25
   1  -3  -3   71.60    4.43
  -1   3   3   75.87    5.10
   1   3  -3   69.95    4.08
  -1  -3   3   64.12    3.75
  -1   3   3   69.73    3.95
   1  -3  -3   68.61    3.96
  -1   3   3   56.87    4.99
  -1  -3   3   71.62    4.39
   1   3  -3   58.68    3.84
   1  -3  -3   57.42    4.91
  -1   3   3   59.99    3.85
   1  -3  -3   70.97    4.19
   1   3  -3   76.01    4.61
  -1   3  -3   34.64    2.37
  -1  -3  -3   34.07    2.64
   1   3   3   28.61    2.34
   1   3   3   37.37    3.27
   1   3   3   38.35    2.65
  -1  -3  -3   31.13    2.26
  -1   3  -3   33.63    2.51
   1  -3   3   30.41    1.99
  -1   3  -3   32.71    2.16
   1  -3   3   38.13    2.47
  -1   3  -3   38.48    2.80
   1   3   3   35.04    2.33
   1  -3   3   36.92    2.57
  -4  -1   4   11.31    1.22
  -4   1   4    7.10    1.56
   4  -1  -4    6.96    1.62
  -4  -1   4   11.82    1.68
   4   1  -4   10.69    1.51
   4  -1  -4   11.48    1.29
   4  -1  -4   11.13    1.40
   4   1  -4   10.16    1.25
  -4   1   4    8.69    1.24
   4   1  -4    8.46    1.77
  -4   1   4    9.96    1.09
   2   3   0   13.55    1.43
  -2   3   0   14.31    1.43
  -2  -3   0   19.41    2.07
   2   3   0   20.78    2.28
   2  -3   0   14.75    1.62
   2  -3   0   16.58    1.46
  -2  -3   0   16.16    1.53
   2  -3   0   16.08    1.56
   2   3   0   15.93    2.12
  -2   3   0   17.36    1.98
  -2   3   0   16.63    1.47
  -2  -3   0   16.34    1.78
  -2  -3   0   14.00    1.23
  -2  -3   0   18.00    1.70
   2  -3   0   14.88    1.45
   2   0  -8   -0.56    1.39
  -2   0   8    0.08    0.95
   2   0  -8   -0.41    1.30
   2   0  -8   -0.48    1.25
   2   0  -8   -0.22    0.82
   0  -2  -7   52.24    3.33
   0   2   7   51.19    3.19
   0  -2  -7   49.09    3.02
   0  -2   7   44.50    2.76
   0   2  -7   50.86    3.39
   0   2  -7   52.34    3.18
   0  -2   7   52.01    3.30
   0   2   7   57.68    4.26
   0   2  -7   51.28    2.95
   0   2   7   40.40    4.12
   0  -2  -7   37.93    3.70
  -2   2   6   18.49    1.72
   2   2  -6   21.87    2.29
  -2  -2   6   22.73    2.08
  -2   2   6   19.82    1.53
   2  -2  -6   14.04    2.11
  -2  -2   6   21.80    1.69
  -2   2   6   15.31    1.58
  -2   2   6   19.74    2.60
   2   2  -6   19.95    1.63
   2  -3  -1   22.84    1.76
   2  -3  -1   14.99    1.55
   2  -3  -1   21.36    1.83
  -2  -3   1   20.28    1.89
  -2  -3   1   21.31    1.59
  -2   3   1   21.90    1.68
  -2  -3   1   22.40    1.83
  -2   3   1   21.57    2.35
   2  -3  -1   17.71    1.54
  -2  -3   1   19.80    2.02
   2   3  -1   21.58    2.27
   2   3  -1   18.74    1.69
  -2   3   1   20.58    1.75
   2   3  -1   16.57    1.94
  -2  -3   1   23.46    1.81
   2   3   1    5.42    1.91
   2  -3   1    7.56    1.30
  -2  -3  -1    5.53    1.43
  -2  -3  -1    6.28    1.22
   2  -3   1    6.44    1.21
   2   3   1    7.00    1.77
  -2   3  -1    6.30    0.96
   2  -3   1    5.37    1.04
  -2   3  -1    6.23    1.36
  -2  -3  -1    6.38    1.53
   2  -3   1    6.20    0.98
  -2  -3  -1    6.01    0.91
   2   3   1    5.24    1.10
  -2   3  -1    4.98    1.04
  -4   1  -4   75.48    4.72
  -4  -1  -4   67.57    4.28
  -4  -1  -4   67.86    4.41
   4   1   4   71.50    4.77
  -4   1  -4   64.93    4.03
  -4  -1  -4   72.20    4.09
   4  -1   4   72.21    4.03
   4   1   4   68.98    3.94
  -4   1  -4   68.15    3.91
   4   1   4   68.35    4.17
  -4  -1  -4   68.74    4.07
   4  -1   4   69.95    4.20
  -2  -2  -6    4.54    1.04
   2   2   6    6.75    2.29
   2   2   6    4.89    0.99
  -2  -2  -6    6.37    2.01
  -2  -2  -6    5.19    1.39
   2   2   6    3.87    1.25
  -2   2  -6    5.50    0.91
  -2   2  -6    4.77    1.08
  -2   0  -8  100.15    5.92
  -2   0  -8   95.84    4.61
   2   0   8   92.51    5.06
  -2   0  -8   95.34    5.11
  -2   0  -8  101.33    5.65
  -2   0  -8   95.99    4.87
   2   0   8  109.00    5.26
  -4   0   5   37.59    2.81
   4   0  -5   35.20    2.39
   4   0  -5   33.13    2.77
  -4   0   5   35.45    2.39
   4   0  -5   29.48    2.29
   4   0  -5   32.40    2.11
   3   0  -7    6.97    1.60
   3   0  -7   10.40    1.09
   3   0  -7    7.55    1.60
   3   0  -7   10.89    1.36
  -3   0   7   11.71    1.39
   0   3   4   41.80    2.58
   0   3   4   42.89    3.47
   0   3  -4   38.90    2.62
   0   3   4   45.99    3.00
   0  -3   4   38.67    2.53
   0  -3  -4   39.34    2.88
   0  -3   4   37.32    2.24
   0   3  -4   38.92    2.41
   0   3  -4   39.50    2.74
   0  -3  -4   39.76    2.54
   0   3   4   36.09    2.20
  -4   0  -5    6.48    1.80
  -4   0  -5    4.89    1.33
   4   0   5    6.15    1.83
  -4   0  -5    6.39    1.07
  -4   0  -5    5.72    1.11
   4   0   5    5.32    1.30
  -3   0  -7   38.56    2.61
  -3   0  -7   36.01    2.13
  -3   0  -7   37.85    2.60
   3   0   7   39.64    2.44
  -3   0  -7   39.18    2.24
  -3   0  -7   37.60    3.05
   3   0   7   31.29    2.01
   3   0   7   38.88    2.77
   1  -2  -7   80.38    4.17
  -1   2   7   80.78    5.54
   1  -2  -7   76.99    4.00
   1   2  -7   69.62    3.93
  -1   2   7   82.70    4.22
  -1  -2   7   86.13    4.50
   1   2  -7   81.72    3.90
   1  -2  -7   69.40    4.87
  -1   2   7   88.47    4.53
   1   2  -7   79.20    3.99
   1  -2  -7   80.28    4.37
  -1  -2   7   83.52    4.17
  -2  -3   2   49.49    2.92
  -2  -3   2   50.03    2.91
   2  -3  -2   38.19    2.35
  -2   3   2   44.05    2.63
  -2  -3   2   46.07    2.82
  -2   3   2   44.91    3.50
   2  -3  -2   37.01    2.22
   2  -3  -2   40.79    3.30
   2   3  -2   48.08    3.50
   2   3  -2   49.57    3.19
  -2  -3   2   45.63    2.53
   2  -3  -2   44.42    2.70
  -2   3   2   52.23    2.84
  -2  -3  -2    0.65    0.76
   2   3   2    0.26    1.93
  -2   3  -2    0.52    1.09
   2  -3   2   -0.12    0.78
  -2   3  -2    0.42    0.83
   2   3   2   -1.29    1.48
   2   3   2   -0.04    0.89
   2  -3   2   -0.01    0.69
  -2  -3  -2    0.34    1.08
  -2   3  -2   -0.55    0.84
  -2  -3  -2    1.44    1.44
  -1  -2  -7   82.22    4.09
  -1  -2  -7   84.36    4.38
  -1   2  -7   76.80    4.16
   1   2   7   68.12    3.65
  -1   2  -7   82.49    4.03
   1   2   7   75.96    3.79
   1   2   7   84.52    4.91
  -1   2  -7   82.82    4.02
  -1  -2  -7   79.06    4.20
  -1   2  -7   77.45    3.95
   0   0  -9   11.10    1.62
   0   0   9   10.54    1.13
   0   0  -9   12.01    1.28
   0   0   9   12.46    1.16
   0   0  -9   11.11    1.46
   0   0   9   13.14    1.51
  -4  -2   0    7.51    1.38
  -4   2   0    8.75    1.17
   4  -2   0    9.93    1.18
  -4  -2   0    9.79    1.33
  -4   2   0    4.69    1.30
   4  -2   0    9.82    1.57
   4   2   0   10.25    1.09
  -4   2   0   12.06    1.09
  -4   2   0    7.99    1.41
   4   2   0   10.72    1.89
  -4  -2   0   10.18    1.13
  -4  -2   0    9.86    1.69
   4   2   0    9.63    1.73
  -4   2   0   10.17    1.54
   4  -2   0    9.80    1.23
   1   3  -4    5.75    1.36
  -1  -3   4    8.39    1.46
  -1  -3   4    8.72    1.13
   1   3  -4    9.66    1.61
   1  -3  -4    7.07    1.25
  -1   3   4    8.32    1.24
  -1   3   4    8.81    2.28
  -1   3   4    7.46    1.03
   1  -3  -4    7.05    1.35
  -1   3   4    5.44    1.10
   1  -3  -4    9.32    1.67
  -1   3  -4    2.31    0.92
  -1  -3  -4    2.79    1.01
   1  -3   4    2.60    0.79
  -1   3  -4    2.16    0.97
   1   3   4    1.53    0.88
   1   3   4    2.73    1.30
   1   3   4    2.31    1.05
  -1  -3  -4    1.51    1.30
  -1   3  -4    1.55    1.27
   1  -3   4    1.95    1.00
  -1   3  -4    1.89    1.22
   1   3   4    2.99    2.03
   4  -2  -1  103.33    6.17
  -4  -2   1  107.44    5.43
   4  -2  -1  105.91    5.44
  -4  -2   1  111.05   10.26
   4   2  -1  117.78   11.00
   4   2  -1  102.25    5.41
   4   2  -1  101.82    6.19
  -4  -2   1  118.46   11.11
  -4   2   1  119.46   11.05
  -4  -2   1  118.56   11.15
   4  -2  -1  107.55    5.93
  -4   2   1  103.10    5.93
   3   2  -5   23.87    2.09
   3   2  -5   19.52    2.34
   3  -2  -5   29.20    2.47
  -3  -2   5   28.79    2.32
  -3   2   5   24.58    1.62
  -3  -2   5   25.74    1.73
   3  -2  -5   19.60    2.16
   3   2  -5   23.62    1.67
  -3   2   5   20.42    2.15
  -3   2   5   26.40    1.88
   4  -2   1    4.77    1.29
  -4  -2  -1    4.43    1.18
  -4   2  -1    4.29    1.19
   4   2   1    5.26    1.03
  -4   2  -1    2.76    0.96
  -4  -2  -1    4.38    0.94
  -4  -2  -1    5.61    1.53
   4  -2   1    4.08    1.13
   4   2   1    4.63    1.86
   4   2   1    4.66    1.57
   4  -2   1    4.11    0.89
  -4   2  -1    4.08    1.30
  -4   2  -1    3.25    1.39
  -4  -2  -1    4.37    1.53
  -3   2  -5   16.63    1.46
  -3  -2  -5    9.29    1.57
  -3   2  -5   13.88    1.59
  -3  -2  -5   14.23    2.12
  -3  -2  -5   13.13    1.19
   3  -2   5   14.32    1.15
  -3   2  -5   12.81    1.22
   3   2   5   12.63    1.35
  -3  -2  -5   13.86    1.36
   2   1  -8   11.44    1.41
   2  -1  -8   10.88    1.49
  -2   1   8    9.70    1.21
  -2   1   8    8.63    1.54
   2  -1  -8   10.55    2.21
  -2   1   8   10.19    1.05
   2   1  -8    8.42    0.93
  -2  -1   8   10.31    1.15
   2  -1  -8    9.75    1.70
  -2  -1   8   10.66    1.48
   2   1  -8   10.98    1.76
   5   0   0   27.03    1.84
  -5   0   0   24.32    1.88
   5   0   0   26.53    2.30
  -5   0   0   27.79    1.88
   5   0   0   20.70    1.99
  -5   0   0   27.24    2.34
   1   0  -9   34.44    2.24
   1   0  -9   34.39    2.51
  -1   0   9   36.11    2.12
   1   0  -9   32.00    2.02
   1   0  -9   27.56    2.66
  -1   0   9   36.26    2.06
  -1   0   9   33.28    2.13
  -1   0  -9   63.79    3.49
   1   0   9   68.24    3.87
   1   0   9   65.27    3.30
  -1   0  -9   67.01    3.95
   1   0   9   62.63    3.40
  -1   0  -9   52.68    2.89
   1   0   9   69.94    3.63
   5   0  -1    5.08    1.51
  -5   0   1    5.54    1.46
   5   0  -1    5.90    1.55
   5   0  -1    5.52    1.11
  -5   0   1    5.37    1.13
   2   1   8   19.83    1.73
  -2   1  -8   20.69    1.73
   2  -1   8   21.54    1.48
  -2   1  -8   21.80    1.48
  -2  -1  -8   20.94    1.86
  -2   1  -8   19.86    1.94
  -2  -1  -8   18.65    1.68
  -2  -1  -8   20.51    1.53
   2   1   8   20.07    1.47
   2   1   8   20.81    2.22
  -2  -1  -8   22.64    2.42
  -2   1  -8   23.17    1.81
   2  -3  -3   52.97    3.08
   2   3  -3   69.15    4.10
  -2  -3   3   62.78    3.48
  -2   3   3   44.57    3.32
   2  -3  -3   53.64    3.25
  -2  -3   3   62.60    3.43
   2  -3  -3   58.60    3.14
   2   3  -3   59.26    3.53
  -2  -3   3   51.13    3.46
  -2   3   3   62.69    3.40
  -2   3   3   49.51    3.22
  -2  -3   3   69.38    3.71
   4  -1  -5    3.32    1.52
  -4  -1   5    5.52    1.01
   4   1  -5    5.76    0.88
   4  -1  -5    6.38    1.08
  -4   1   5    4.73    0.93
   4   1  -5    5.80    1.39
  -4   1   5    5.34    1.41
   4   1  -5    4.57    1.03
   4  -1  -5    4.56    1.20
   4   1  -5    5.25    1.64
  -4   1   5    4.89    1.14
   5   0   1    6.68    1.47
  -5   0  -1    6.23    1.10
  -5   0  -1    6.59    1.37
   5   0   1    7.79    1.11
   5   0   1    5.18    1.83
  -5   0  -1    6.20    1.45
  -4  -2   2   40.99    2.33
   4   2  -2   34.93    2.20
  -4  -2   2   37.29    2.41
  -4   2   2   44.15    2.76
   4  -2  -2   38.16    2.38
  -4   2   2   39.47    2.48
   4   2  -2   31.21    2.41
   4  -2  -2   36.20    2.86
   4   2  -2   44.71    2.98
   4  -2  -2   28.91    2.14
   2   3   3   29.05    2.40
  -2   3  -3   29.48    2.06
  -2   3  -3   29.15    1.82
  -2  -3  -3   20.40    2.04
  -2  -3  -3   23.95    1.90
  -2  -3  -3   30.72    1.92
  -2   3  -3   25.54    1.75
   2   3   3   28.09    1.88
  -2  -3  -3   27.28    2.01
   2   3   3   31.17    2.92
   2  -3   3   27.09    1.71
   2  -3   3   27.98    2.02
   3  -1  -7    8.23    1.73
   3   1  -7    8.70    1.74
   3  -1  -7    8.08    1.35
   3   1  -7    8.33    0.95
   3   1  -7    6.44    1.38
  -3  -1   7    7.25    1.47
   3  -1  -7    6.85    1.13
   3  -1  -7    4.97    1.81
  -3   1   7    6.22    0.99
  -3  -1   7    9.60    1.21
   3   1  -7    8.37    1.28
  -4   2  -2    5.31    1.33
  -4  -2  -2    6.19    1.10
  -4   2  -2    7.28    1.19
   4  -2   2    6.88    1.31
  -4   2  -2    5.58    1.27
   4   2   2    4.93    1.53
  -4  -2  -2    6.37    1.00
   4   2   2    4.99    0.94
  -4   2  -2    5.62    1.11
  -4  -2  -2    8.58    1.61
  -4  -2  -2    6.70    1.48
   4   2   2    7.06    2.00
   4  -2   2    6.04    1.08
  -4   1  -5    1.68    1.20
  -4  -1  -5    2.82    1.97
  -4   1  -5    1.56    0.92
   4   1   5    2.97    1.27
   4   1   5    1.93    1.75
  -4  -1  -5    1.69    1.30
  -4   1  -5    2.95    1.33
  -4   1  -5    1.98    0.91
   4  -1   5    2.22    0.84
   4  -1   5    2.30    1.04
  -4  -1  -5    1.94    0.96
  -4  -1  -5    2.21    0.84
  -4  -1  -5    2.62    1.32
  -3   1  -7   69.50    3.48
  -3   1  -7   72.51    3.97
  -3  -1  -7   73.57    4.05
  -3  -1  -7   69.79    3.57
   3  -1   7   78.49    3.95
  -3  -1  -7   69.49    4.22
  -3   1  -7   67.30    3.68
  -3   1  -7   66.14    3.76
   3  -1   7   71.22    3.63
  -3  -1  -7   66.73    3.65
   3   1   7   69.87    3.61
  -3   1  -7   69.03    3.45
  -3  -1  -7   69.63    3.46
   3   1   7   64.96    3.96
   3   1   7   56.52    3.18
   5   0  -2   -0.04    1.00
  -5   0   2    1.02    1.33
   5   0  -2   -0.09    1.36
   5   0  -2    0.57    0.69
   5   0  -2   -0.06    1.25
   0  -3   5   20.01    1.76
   0   3  -5   21.27    1.91
   0  -3  -5   16.29    1.96
   0   3  -5   19.90    1.88
   0  -3  -5   18.49    1.66
   0  -3  -5   14.61    1.93
   0   3   5   18.59    2.56
   0  -3  -5   20.50    1.72
   0   3   5   19.62    1.93
   0   3   5   24.14    1.91
   0   3   5   19.67    1.51
   0  -3   5   21.73    1.55
   0   1  -9   59.73    3.14
   0   1  -9   58.29    3.21
   0   1   9   60.65    3.36
   0  -1   9   57.51    3.14
   0   1  -9   59.48    3.51
   0  -1   9   63.44    3.22
   0  -1   9   59.40    3.02
   0  -1  -9   57.10    3.24
   0   1   9   58.42    3.58
   0   1  -9   61.61    3.45
   0   1   9   61.36    3.16
   5   0   2   -0.03    1.19
  -5   0  -2   -0.77    0.93
  -5   0  -2   -0.40    1.25
   5   0   2   -0.04    0.86
  -5   0  -2   -0.63    1.44
   4   0  -6   22.09    1.72
  -4   0   6   15.45    1.70
   4   0  -6   17.43    1.67
  -4   0   6   23.97    1.75
   4   0  -6   23.13    2.23
   2  -2  -7    8.09    2.06
  -2   2   7    8.25    1.39
  -2  -2   7   10.62    1.44
   2  -2  -7    9.56    1.68
  -2   2   7    9.39    1.07
  -2   2   7    8.59    1.99
   2   2  -7   10.66    0.98
   2   2  -7   10.87    1.83
  -2   2   7    6.99    1.19
  -2  -2   7    9.50    1.09
   2  -2  -7    9.20    1.38
   2   2  -7    9.24    1.10
  -4   2   3   27.32    1.97
  -4   2   3   23.90    2.14
   4  -2  -3   34.23    2.68
   4  -2  -3   22.07    1.70
   4   2  -3   32.31    2.45
   4  -2  -3   30.04    2.16
  -4  -2   3   30.97    2.13
   4   2  -3   32.00    2.04
  -4  -2   3   29.41    1.84
  -4   0  -6   50.18    3.11
   4   0   6   48.74    2.83
  -4   0  -6   49.57    2.70
   4   0   6   51.74    3.36
  -4   0  -6   50.11    3.35
  -4   0  -6   46.93    2.64
  -2   2  -7    2.31    0.90
   2   2   7    2.81    1.22
  -2  -2  -7    2.25    1.22
  -2   2  -7    2.46    0.71
   2   2   7    2.46    0.85
  -2   2  -7    2.74    1.17
   2   2   7    1.33    2.06
  -2  -2  -7    3.54    1.92
  -2  -2  -7    3.35    0.95
  -1   3   5   23.77    1.67
   1   3  -5   24.77    2.09
  -1  -3   5   25.89    2.07
   1  -3  -5   22.78    2.11
   1   3  -5   24.54    2.22
   1  -3  -5   22.65    1.77
   1  -3  -5   18.57    1.70
  -1  -3   5   24.09    1.73
  -1   3   5   23.45    1.81
  -1   3   5   19.22    2.54
  -5  -1   0    2.10    1.53
  -5   1   0    2.22    1.22
  -5   1   0    1.90    0.99
  -5  -1   0    1.72    1.00
   5   1   0    1.61    0.96
   5  -1   0    1.62    0.68
  -5  -1   0    1.64    1.03
   5  -1   0    1.63    1.26
   5   1   0    2.61    1.64
  -1   1   9   18.56    2.14
  -1   1   9    9.49    1.21
  -1   1   9   14.50    1.69
   1  -1  -9   14.71    2.11
   1  -1  -9   15.40    1.83
   1   1  -9   15.31    1.95
   1  -1  -9   10.90    2.06
   1   1  -9   14.60    1.66
  -1  -1   9   14.69    1.82
   1  -1  -9   14.17    1.56
   1   1  -9   14.64    2.21
  -4  -2  -3    2.37    1.41
   4   2   3    1.53    1.98
  -4  -2  -3    1.92    1.04
  -4  -2  -3    2.47    1.37
  -4  -2  -3    0.47    1.32
  -4   2  -3    1.45    1.20
  -4   2  -3    2.27    0.89
   4  -2   3    1.71    0.82
  -4  -2  -3    1.63    0.84
  -4   2  -3    1.90    1.14
   4  -2   3    2.04    1.10
  -1  -3  -5   15.63    2.02
   1   3   5   15.98    1.99
  -1   3  -5   15.23    2.11
  -1  -3  -5   12.92    1.63
   1   3   5   12.19    1.53
   1   3   5   11.59    1.74
   1  -3   5   18.14    1.98
   1   3   5   19.12    2.99
  -1  -3  -5   15.18    2.28
  -1   3  -5   15.62    2.05
  -1   3  -5   14.60    1.88
  -1   3  -5   17.52    2.11
   1   1   9    2.96    0.84
  -1  -1  -9    3.05    0.90
   1  -1   9    2.52    1.02
  -1  -1  -9    5.85    2.02
  -1   1  -9    3.84    0.92
  -1  -1  -9    3.26    1.14
  -1   1  -9    4.35    1.28
  -1  -1  -9    4.21    1.40
   1  -1   9    4.14    0.91
   1   1   9    4.24    1.76
  -1   1  -9    4.85    1.35
  -1   1  -9    2.54    1.27
   5  -1  -1   14.39    1.81
  -5  -1   1   17.99    2.04
   5   1  -1   16.50    2.47
  -5  -1   1   16.32    2.29
  -5   1   1   14.65    2.11
   5  -1  -1   15.40    2.17
  -5  -1   1   14.53    1.94
   5  -1  -1   13.04    1.64
  -5   1   1   16.54    1.94
   5   1  -1   14.42    1.75
   0   2   8    6.11    1.32
   0  -2  -8    2.51    1.84
   0  -2  -8    2.92    1.15
   0   2  -8    4.44    1.38
   0  -2   8    5.38    1.30
   0   2   8    4.56    1.02
   0  -2  -8    5.57    1.10
   0   2  -8    4.74    0.87
   0  -2  -8    4.82    1.28
   0   2  -8    4.56    1.04
   0   2   8    5.66    2.02
   0  -2   8    4.88    1.11
  -2  -3   4   33.34    3.41
   2  -3  -4   29.02    2.96
  -2  -3   4   30.87    3.33
  -2   3   4   38.70    3.79
   2   3  -4   43.91    4.63
  -2  -3   4   40.84    4.11
  -2   3   4   31.05    3.87
   2  -3  -4   34.17    3.56
   2  -3  -4   36.32    3.83
  -2   3   4   34.98    4.26
   2   3  -4   41.82    4.37
  -2   3   4   32.57    3.46
  -2  -3   4   38.29    3.84
   2  -3  -4   26.63    2.96
   5  -1   1    9.79    1.27
  -5  -1  -1    9.45    1.67
  -5  -1  -1   10.36    1.88
   5   1   1    9.47    2.13
  -5   1  -1    9.50    1.73
   5  -1   1   10.33    1.79
  -5   1  -1    7.40    1.16
  -5  -1  -1   10.29    1.45
  -5   1  -1   10.06    1.73
   5   1   1    8.15    1.65
  -5  -1  -1    8.72    1.51
   5   1   1   10.19    1.39
   5   0  -3    0.48    0.68
  -5   0   3    0.78    1.33
   5   0  -3   -0.05    1.13
   5   0  -3    0.66    1.02
  -2   3  -4   11.34    1.46
   2   3   4   10.79    1.61
   2  -3   4   12.61    1.48
  -2  -3  -4    9.86    1.59
   2   3   4    8.76    2.70
  -2  -3  -4    7.43    1.71
   2   3   4   14.50    2.12
  -2   3  -4   12.22    1.65
  -2   3  -4   11.37    1.42
  -2  -3  -4   12.75    1.70
   2   3   4    9.51    1.37
   2  -3   4   11.66    1.62
   2  -3   4   11.47    1.66
  -3  -3   0   13.97    1.98
   3   3   0   13.00    2.09
   3  -3   0   13.61    1.76
  -3   3   0   12.65    1.67
   3  -3   0   13.14    1.69
  -3  -3   0   13.87    1.65
  -3   3   0    9.83    1.28
  -3  -3   0   10.37    1.90
  -3  -3   0   14.39    1.90
  -3   3   0   13.21    1.69
  -3   3   0   13.28    1.97
   3   3   0   14.56    1.89
   3  -3   0   11.38    1.76
   3   0  -8   12.66    1.59
   3   0  -8   15.47    1.95
   3   0  -8   14.74    2.19
   3   0  -8    9.48    1.84
  -3   0   8   15.57    1.89
  -5   0  -3   29.73    3.29
  -5   0  -3   35.67    3.59
   5   0   3   31.65    3.40
   5   0   3   27.01    2.73
   5   0   3   40.64    4.40
  -5   0  -3   31.36    3.27
  -5   0  -3   37.25    4.05
   3   2  -6   20.84    2.54
   3  -2  -6   21.92    2.52
  -3   2   6   22.00    2.43
  -3   2   6   22.03    2.44
   3  -2  -6   16.04    2.58
  -3   2   6   11.12    2.27
  -3  -2   6   13.83    1.95
   3   2  -6   23.15    2.90
  -3   2   6   18.66    2.05
  -3  -2   6   19.70    2.14
   3   2  -6   19.21    2.12
   2   0  -9   36.73    3.96
  -2   0   9   26.05    2.65
   2   0  -9   22.62    2.75
  -2   0   9   42.33    4.21
   2   0  -9   39.47    3.98
   2   0  -9   30.54    3.30
  -3  -3   1    8.90    2.62
   3  -3  -1   12.05    1.63
  -3   3   1   14.53    2.28
  -3  -3   1    9.18    3.04
  -3   3   1    8.88    1.26
  -3  -3   1    8.39    1.92
  -3   3   1   10.05    1.42
  -3   3   1   10.11    1.46
   3  -3  -1   10.35    1.46
   3  -3  -1   12.70    1.96
   3   3  -1    7.41    2.13
  -3  -3   1   11.21    2.07
  -3  -3   1   10.58    1.43
   3  -3  -1    7.93    1.22
  -3   3  -1    0.94    0.78
   3  -3   1    0.49    0.78
   3   3   1    1.20    1.04
  -3   3  -1    0.15    1.01
  -3  -3  -1    0.99    1.29
  -3   3  -1    1.57    0.98
  -3   3  -1    0.79    0.70
   3  -3   1    0.75    1.13
  -3  -3  -1    1.40    0.71
   3  -3   1    1.96    0.91
   3   3   1    0.43    1.47
  -3  -3  -1    0.95    1.02
  -5  -1   2   16.70    2.09
  -5  -1   2   16.25    1.89
   5   1  -2   16.65    2.27
  -5   1   2   19.30    2.52
  -5  -1   2    8.91    1.61
   5  -1  -2   13.71    2.07
  -5   1   2   19.10    2.18
   5  -1  -2   19.77    2.18
   5  -1  -2   13.27    1.66
   5   1  -2   15.59    1.84
   3  -2   6   38.92    3.77
   3   2   6   28.17    3.06
  -3  -2  -6   36.21    4.05
  -3   2  -6   32.07    3.19
  -3  -2  -6   34.31    3.68
  -3   2  -6   36.76    3.74
  -3  -2  -6   35.67    3.59
   1   2  -8   99.27    9.45
   1  -2  -8   64.64    7.45
  -1  -2   8   86.67    8.08
  -1   2   8   86.47    8.24
   1  -2  -8   70.75    7.88
   1  -2  -8   92.34    8.67
   1   2  -8   99.76    9.18
   1   2  -8   89.99    8.41
  -1   2   8   68.16    8.94
  -1   2   8   89.96    9.06
  -1  -2   8   98.51    9.26
  -2   0  -9   11.75    2.17
  -2   0  -9   10.27    1.28
  -2   0  -9   11.37    1.73
   2   0   9   10.81    1.56
  -2   0  -9   12.54    1.68
   2   0   9   10.06    1.32
  -2   0  -9   11.32    1.43
  -3   0  -8   35.82    3.96
  -3   0  -8   35.61    3.70
  -3   0  -8   34.97    3.64
   3   0   8   36.20    3.86
   3   0   8   35.38    3.55
  -3   0  -8   33.83    3.34
   3   0   8   27.97    2.87
  -3   0  -8   34.76    3.40
  -5  -1  -2    3.13    1.44
  -5   1  -2    3.61    1.05
   5   1   2    2.87    0.91
   5  -1   2    2.96    0.74
  -5  -1  -2    3.76    1.33
   5   1   2    3.80    1.46
   5  -1   2    4.09    1.33
  -5   1  -2    3.25    1.33
   5   1   2    3.84    1.73
  -5  -1  -2    3.46    1.17
  -5   1  -2    4.39    1.45
  -1   2  -8   30.10    2.96
  -1   2  -8   29.36    2.91
  -1  -2  -8   23.91    2.68
   1   2   8   20.24    2.79
   1   2   8   20.00    2.16
  -1  -2  -8   25.90    2.71
  -1   2  -8   28.38    3.12
  -1  -2  -8   22.74    2.82
   1   2   8   30.63    3.23
  -1   2  -8   25.76    2.67
  -1   2  -8   30.63    3.07
   4   1  -6    6.93    1.06
   4   1  -6    5.91    1.39
   4  -1  -6    5.02    1.70
  -4   1   6    5.29    1.08
   4   1  -6    6.05    1.18
   4  -1  -6    6.45    1.36
   4   1  -6    8.27    1.87
  -4  -1   6    5.56    1.18
  -4   1   6    7.15    1.56
  -3   3   2    1.17    0.89
   3   3  -2    0.62    1.47
  -3   3   2    0.73    0.77
  -3  -3   2    0.62    0.95
   3  -3  -2    0.92    0.97
  -3   3   2    0.87    1.02
  -3  -3   2    1.14    0.77
  -3  -3   2    1.61    1.18
  -3  -3   2    1.08    1.31
   3  -3  -2    0.75    1.39
  -3   3   2    1.62    1.56
   3  -3  -2    0.80    0.90
   3  -3  -2    0.68    0.77
  -4  -2   4   53.14    5.08
  -4  -2   4   43.86    4.55
   4   2  -4   41.83    4.31
  -4   2   4   41.98    4.07
   4  -2  -4   47.09    5.00
  -4  -2   4   44.89    4.82
   4   2  -4   38.24    4.08
  -4   2   4   54.00    5.21
  -4   2   4   42.62    4.81
   4  -2  -4   41.02    4.33
   4   2  -4   52.63    5.08
  -3  -3  -2   15.89    2.05
   3   3   2   17.78    2.15
  -3   3  -2   17.25    2.02
   3  -3   2   16.68    2.09
  -3  -3  -2   16.23    2.25
  -3   3  -2   18.03    1.97
  -3   3  -2   20.11    2.17
  -3   3  -2   19.75    2.31
   3  -3   2   15.36    1.75
  -3  -3  -2   14.91    1.71
  -3  -3  -2   20.04    2.30
   3   3   2   16.56    2.79
  -4   1  -6   25.95    2.68
  -4   1  -6   26.47    2.96
  -4  -1  -6   26.38    2.98
  -4  -1  -6   28.56    3.25
   4   1   6   27.21    2.99
   4  -1   6   28.59    3.00
   4   1   6   22.45    2.48
   4   1   6   27.85    3.41
  -4   1  -6   28.17    3.28
  -4  -1  -6   28.08    3.47
   4  -1   6   27.59    2.79
  -4  -1  -6   22.16    2.30
  -4   1  -6   25.07    2.62
  -4  -1  -6   28.29    2.96
  -4  -2  -4    4.17    1.44
   4   2   4    4.35    1.19
  -4   2  -4    2.94    1.37
  -4  -2  -4    5.35    1.20
  -4  -2  -4    4.89    1.01
  -4  -2  -4    4.04    1.65
   4  -2   4    1.75    1.48
   4   2   4    4.89    2.15
  -4   2  -4    2.52    1.32
  -4   2  -4    2.16    1.56
  -4  -2  -4    4.87    1.40
   0   3   6   44.17    4.39
   0  -3   6   43.36    4.35
   0   3  -6   44.11    4.48
   0   3   6   41.71    4.55
   0  -3   6   43.62    4.22
   0   3   6   32.78    3.27
   0   3   6   28.76    4.26
   0  -3  -6   28.26    3.30
   0   3  -6   44.53    4.57
   0  -3  -6   44.98    4.50
   5   0  -4    8.25    1.15
   5   0  -4    7.71    1.46
  -5   0   4    8.76    1.68
   5   0  -4    7.67    1.35
  -5   0   4    8.56    1.35
   5  -1  -3   57.92    6.61
   5   1  -3   73.79    7.25
  -5   1   3   63.88    6.07
  -5  -1   3   56.38    5.82
  -5  -1   3   74.79    7.03
   5  -1  -3   52.66    5.05
   5   1  -3   55.68    5.32
  -5   1   3   69.21    6.82
   5   1  -3   75.09    7.25
  -5  -1   3   56.39    6.35
   5  -1  -3   57.66    6.16
   5  -1  -3   51.61    5.15
   0   0  10   18.00    2.00
   0   0 -10   17.01    2.26
   0   0  10   19.04    2.10
   0   0 -10   12.71    1.71
   0   0 -10   17.17    2.16
   0   0  10   17.08    2.05
  -3  -1   8   32.51    3.45
   3  -1  -8   50.62    4.97
   3   1  -8   45.10    4.38
   3  -1  -8   40.17    4.13
   3  -1  -8   39.78    5.15
   3   1  -8   48.49    4.70
   3   1  -8   32.86    3.64
   3  -1  -8   45.38    4.84
  -3  -1   8   50.08    4.83
  -5  -1  -3    0.89    1.39
  -5  -1  -3    0.45    0.98
   5  -1   3    0.83    0.88
  -5   1  -3    0.80    0.80
   5   1   3    0.69    1.41
   5   1   3   -0.09    1.59
   5  -1   3    0.26    0.97
  -5   1  -3    1.18    1.18
   5  -1   3    0.74    0.62
  -5   1  -3    0.61    1.39
   5   1   3    1.42    0.91
  -5   0  -4  131.96   12.20
   5   0   4  180.80   11.32
  -5   0  -4  175.48   11.03
  -5   0  -4  161.21   14.81
   5   0   4  165.31   10.22
  -5   0  -4  140.80   13.27
   2  -1  -9    9.46    1.63
   2   1  -9    6.87    1.02
   2  -1  -9    9.75    1.94
   2   1  -9    9.03    1.79
  -2  -1   9    9.63    1.67
  -2   1   9    7.68    1.16
   2   1  -9    9.45    1.45
  -2  -1   9    9.60    1.36
   2  -1  -9    7.03    2.07
  -2   1   9    7.38    1.33
   2  -3  -5   24.71    2.69
  -2  -3   5   31.23    3.12
   2   3  -5   33.81    3.66
  -2  -3   5   21.50    2.52
   2   3  -5   22.05    2.67
   2  -3  -5   22.09    2.92
  -2   3   5   16.94    2.67
  -2  -3   5   33.45    3.43
  -2   3   5   24.93    2.88
   2  -3  -5   31.04    3.45
   2   3  -5   25.72    2.57
  -2   3   5   30.20    3.27
   2   3   5    5.15    1.52
  -2  -3  -5    4.18    1.10
   2   3   5    3.37    1.19
  -2  -3  -5    4.38    1.27
  -2   3  -5    3.58    0.82
   2  -3   5    4.26    0.79
   2   3   5    6.52    2.37
  -2   3  -5    4.43    0.92
  -2   3  -5    4.35    1.27
   3  -3  -3    6.70    1.13
  -3   3   3    9.48    1.40
   3   3  -3    8.07    1.12
  -3  -3   3    9.56    1.55
  -3   3   3    7.58    1.14
  -3   3   3    7.38    1.93
   3  -3  -3    8.04    1.39
   3  -3  -3    9.94    1.82
  -3  -3   3    7.98    1.73
  -3  -3   3    8.78    1.38
  -3   3   3    7.25    1.26
   3   3  -3    7.40    1.63
  -3  -3   3   10.00    1.31
   3  -3  -3    9.54    1.41
   4   0  -7    4.11    1.60
   4   0  -7    4.61    1.24
   4   0  -7    1.89    1.27
  -4   0   7    4.85    1.12
   1  -3  -6   18.64    2.16
   1  -3  -6   19.39    2.28
   1   3  -6   16.93    2.27
  -1   3   6   16.19    2.02
  -1   3   6   18.77    2.89
   1  -3  -6   17.62    2.21
  -1  -3   6   17.17    2.14
   1   3  -6   19.90    2.46
   1  -3  -6   17.01    2.47
  -1  -3   6   17.91    2.03
  -2   1  -9   57.97    3.93
  -2  -1  -9   52.95    3.69
  -2   1  -9   55.87    5.46
  -2   1  -9   57.81    4.09
   2   1   9   55.65    4.14
  -2  -1  -9   51.49    3.43
   2  -1   9   56.73    3.69
  -2   1  -9   56.75    3.65
  -2  -1  -9   50.11    3.49
   2   1   9   43.88    4.32
  -2   1  -9   59.52    3.97
  -3   1  -8   37.41    3.84
   3   1   8   43.36    4.30
  -3  -1  -8   38.96    4.00
  -3   1  -8   38.44    3.96
   3   1   8   34.20    3.46
  -3  -1  -8   37.30    3.67
  -3  -1  -8   34.93    3.58
  -3   1  -8   38.15    4.03
   3  -1   8   38.11    3.72
  -3   1  -8   38.37    3.73
   3  -1   8   41.24    4.02
  -3  -1  -8   36.67    4.17
  -3   1  -8   36.23    3.54
   3   3   3   16.48    2.52
  -3   3  -3   17.67    1.73
  -3  -3  -3   14.28    1.36
   3  -3   3   13.74    1.61
   3  -3   3   17.39    1.64
   3   3   3   16.69    1.98
  -3  -3  -3   13.97    1.60
  -3   3  -3   16.18    1.37
  -3  -3  -3   16.42    1.65
  -3   3  -3   13.61    1.39
  -3   3  -3   15.90    1.41
   3  -3   3   15.35    1.40
  -1  -3  -6   12.31    1.41
   1   3   6    7.41    2.31
  -1   3  -6   13.02    1.66
  -1   3  -6   12.14    1.51
  -1   3  -6   12.07    1.77
  -1   3  -6   11.12    1.43
   1  -3   6   12.77    1.51
   1   3   6   11.89    1.59
  -1  -3  -6   10.69    1.91
   1   3   6   12.17    1.48
  -1  -3  -6   12.56    1.62
   1  -3   6   12.80    1.22
  -1   0  10   14.98    1.45
   1   0 -10   14.27    1.60
   1   0 -10   13.36    1.89
   1   0 -10    8.91    1.97
  -1   0  10   15.61    1.40
  -1   0  10   14.55    1.58
   1   0  10  109.43    7.96
  -1   0 -10   95.95    6.12
  -1   0 -10  101.13    7.23
   1   0  10  101.33    7.21
   1   0  10   94.09    5.84
   1   0  10   94.48    6.00
   4   0   7   66.30    4.39
  -4   0  -7   62.14    4.02
  -4   0  -7   60.43    4.47
  -4   0  -7   64.92    4.50
   4   0   7   63.07    4.46
  -4   0  -7   63.37    4.35
  -4   0  -7   61.37    4.00
  -2   2   8   17.94    1.95
  -2  -2   8   21.11    1.74
   2  -2  -8   14.03    2.37
   2   2  -8   19.89    1.59
   2   2  -8   19.69    1.70
  -2  -2   8   17.35    1.83
   2   2  -8   14.75    1.96
   2  -2  -8   20.45    1.97
  -2   2   8   10.00    2.37
   2  -2  -8   20.87    2.22
  -2   2  -8   13.80    1.73
  -2   2  -8   15.21    1.31
   2   2   8   13.82    1.63
  -2  -2  -8   13.87    1.72
  -2   2  -8   14.56    1.46
   2   2   8   12.19    1.34
  -2  -2  -8   13.30    1.39
   2   2   8   17.18    2.54
  -2   2  -8   14.68    1.93
  -2   2  -8   16.03    1.71
   4   2  -5   55.06    3.75
   4   2  -5   51.66    4.12
  -4  -2   5   37.05    2.94
   4  -2  -5   37.42    3.09
  -4   2   5   45.02    4.76
  -4  -2   5   58.68    3.85
   4   2  -5   54.73    4.00
   4  -2  -5   44.77    3.79
  -5  -1   4   31.93    2.38
   5  -1  -4   25.99    2.29
   5  -1  -4   27.41    2.65
   5  -1  -4   27.80    2.29
   5  -1  -4   26.14    2.38
   5   1  -4   32.47    2.73
   5  -1  -4   30.62    2.74
   5   1  -4   28.09    2.25
  -5   1   4   23.94    2.82
   5   1  -4   23.30    2.98
  -3   2   7   -0.82    1.37
   3   2  -7   -0.22    1.01
   3   2  -7    0.22    0.83
  -3  -2   7    0.48    1.20
  -3  -2   7    0.75    0.78
   3   2  -7   -0.10    1.46
  -3   2   7    0.39    1.06
   3  -2  -7    0.53    1.47
   3  -2  -7    0.05    1.04
   0  -1 -10    2.68    1.00
   0   1 -10    3.72    1.46
   0   1 -10    4.33    1.07
   0  -1 -10    2.76    1.31
   0   1  10    3.36    0.91
   0  -1  10    3.59    0.99
   0   1  10    2.63    1.39
   0   1 -10    3.44    0.88
   0  -1  10    3.82    0.79
   0   1  10    3.23    1.12
   0  -1  10    3.09    0.73
  -4  -2  -5   19.82    1.82
  -4   2  -5   20.22    1.99
   4   2   5   16.90    1.90
  -4   2  -5   21.73    2.16
   4   2   5   19.90    2.68
   4  -2   5   22.50    1.93
  -4  -2  -5   14.48    2.02
   4  -2   5   20.63    1.64
  -4   2  -5   19.44    1.73
   5  -1   4    5.86    1.28
   5   1   4    5.08    0.99
  -5   1  -4    6.27    1.58
   5  -1   4    4.66    0.83
   5   1   4    7.72    1.86
  -5  -1  -4    6.05    1.14
   5   1   4    6.38    1.46
  -5  -1  -4    5.31    1.47
  -5   1  -4    5.43    1.10
  -5  -1  -4    5.80    1.80
  -5   1  -4    5.38    1.34
   3   2   7    2.35    0.90
  -3   2  -7    4.83    1.17
  -3   2  -7    3.50    0.80
  -3  -2  -7    3.01    0.96
   3   2   7    3.96    1.30
  -3   2  -7    4.87    1.06
  -3  -2  -7    2.89    1.37
  -5   0   5    3.85    1.07
   5   0  -5    3.89    1.16
   5   0  -5    2.89    0.96
   3   3  -4    9.11    1.03
  -3  -3   4   10.64    1.13
  -3   3   4    8.76    1.27
   3  -3  -4    6.53    1.08
  -3   3   4    9.15    1.34
   3  -3  -4    7.56    1.53
  -3  -3   4    8.73    1.61
   3   3  -4    8.77    1.68
  -3   3   4   10.90    1.16
   3  -3  -4   10.55    1.38
  -3   3   4    7.87    1.96
  -3  -3   4   10.97    1.37
   3  -3  -4    9.09    1.39
   4   1  -7   18.76    1.90
   4   1  -7   23.88    1.97
  -4   1   7   13.56    1.30
   4  -1  -7   14.26    2.33
   4  -1  -7   23.08    2.52
   4  -1  -7   25.78    2.19
  -4  -1   7   23.55    1.91
   4   1  -7   12.74    1.77
   0   2   9    3.00    1.88
   0  -2   9    5.57    1.04
   0  -2  -9    2.52    1.89
   0   2  -9    4.49    0.78
   0   2   9    2.52    0.75
   0   2  -9    5.54    1.49
   0  -2  -9    4.29    0.95
   0  -2  -9    6.92    1.44
   0   2  -9    5.45    1.07
   3  -3   4   16.18    1.39
  -3   3  -4   16.16    1.41
  -3   3  -4   16.70    1.48
  -3  -3  -4   10.79    1.26
  -3  -3  -4   14.62    1.36
   3   3   4    8.81    1.47
   3   3   4   17.42    2.68
  -3   3  -4   16.46    1.68
  -3  -3  -4   13.40    1.64
  -3   3  -4   13.12    1.36
   5   0   5   41.32    3.10
  -5   0  -5   34.73    2.81
   5   0   5   46.81    3.57
  -5   0  -5   45.39    3.16
  -5   0  -5   48.14    3.88
   1  -1 -10   67.06    5.75
   1   1 -10   73.36    4.98
  -1   1  10   65.17    6.39
   1   1 -10   79.34    4.98
   1   1 -10   78.69    5.07
  -1   1  10   64.49    4.14
   1  -1 -10   81.06    5.27
  -1   1  10   83.36    5.44
   1  -1 -10   83.35    5.58
  -1  -1  10   80.87    5.16
   3   0  -9   -0.07    1.40
   3   0  -9    0.92    1.10
  -3   0   9    0.76    0.94
   3   0  -9    0.35    1.24
   1  -1  10   15.50    1.57
  -1   1 -10   16.68    1.50
  -1   1 -10   14.86    1.68
   1   1  10   14.36    1.69
   1   1  10   11.21    1.76
   1  -1  10   16.84    1.40
   1   1  10   13.94    1.36
  -1  -1 -10   13.99    1.35
   1  -1  10   16.63    1.42
  -1  -1 -10   15.26    1.68
  -1   1 -10   16.27    1.65
   4  -1   7    4.74    0.90
  -4  -1  -7    3.49    1.46
   4  -1   7    4.87    1.01
  -4   1  -7    4.44    1.28
   4   1   7    3.25    1.24
  -4  -1  -7    3.23    1.37
  -4  -1  -7    3.97    1.91
  -4   1  -7    3.98    1.41
  -4  -1  -7    4.07    1.01
  -4   1  -7    5.16    0.98
   4   1   7    3.58    1.96
   4   1   7    2.70    1.02
  -4   1  -7    4.23    0.86
   0   4   0   16.92    1.60
   0   4   0   15.83    1.96
   0  -4   0   18.52    1.63
   0  -4   0   19.29    1.88
   0  -4   0   16.42    1.93
   0  -4   0   20.25    1.82
   0   4   0   19.26    1.64
   0   4   0   19.85    2.37
   0   3  -7   22.71    2.10
   0   3  -7   27.76    2.46
   0  -3  -7   24.99    2.25
   0  -3  -7   25.57    2.09
   0   3   7   15.97    2.93
   0  -3  -7   21.51    2.49
   0  -3   7   23.62    1.82
   0  -3   7   26.62    2.23
  -2  -3   6   22.24    1.93
  -2   3   6   21.41    1.91
   2   3  -6   24.92    2.41
  -2  -3   6   25.96    2.33
  -2   3   6   12.55    2.48
   2  -3  -6   16.91    2.05
   2   3  -6   24.62    2.39
   2   3  -6   23.91    1.93
  -2   3   6   19.86    2.27
  -2  -3   6   18.84    1.72
   2  -3  -6   14.03    2.05
   2  -3  -6   18.73    1.83
   5  -2   0   22.25    1.97
   5   2   0   21.07    2.41
  -5  -2   0   23.40    2.11
  -5  -2   0   21.17    2.02
   5   2   0   19.95    1.68
  -5   2   0   16.56    1.83
   5  -2   0   23.96    1.97
  -5  -2   0   25.01    2.01
   5  -2   0   23.52    2.31
  -5   2   0   16.04    1.49
   5   2   0   23.57    2.41
   1  -2  -9    1.83    1.55
   1  -2  -9    1.24    1.30
  -1   2   9    0.70    1.61
  -1  -2   9    2.34    0.87
  -1  -2   9    1.20    1.03
   1   2  -9    1.47    0.68
   1   2  -9    3.05    1.59
   1   2  -9    1.69    0.98
   3   0   9    3.87    1.01
   3   0   9    3.13    1.55
  -3   0  -9    3.79    0.81
  -3   0  -9    5.36    1.29
  -3   0  -9    2.89    1.75
  -3   0  -9    3.45    1.29
  -3   0  -9    3.71    0.83
   3   0   9    3.19    0.87
  -1  -2  -9   20.36    1.71
  -1   2  -9   22.95    1.69
   1  -2   9   20.40    1.61
  -1  -2  -9   25.15    2.29
  -1   2  -9   23.80    1.92
   1  -2   9   24.64    1.84
  -1   2  -9   25.35    2.25
  -1   2  -9   24.62    1.85
   1   2   9   23.92    2.69
   1   2   9   19.26    1.77
  -1   2  -9   25.97    1.99
   0  -4  -1   22.43    2.24
   0  -4  -1   16.91    1.68
   0  -4   1   23.83    1.95
   0  -4  -1   20.31    1.76
   0  -4  -1   22.20    2.01
   0   4  -1   17.22    1.91
   0  -4   1   18.28    2.00
   0   4   1   20.86    1.77
   0   4   1   18.71    1.96
   0   4   1   22.69    1.93
   0   4  -1   21.14    1.82
   0  -4   1   22.27    1.81
   0  -4   1   22.77    2.02
   0   4   1   20.66    2.62
   0   4  -1   24.47    2.53
   0   4  -1   21.38    1.75
  -2  -3  -6   23.99    2.22
  -2   3  -6   23.37    2.03
   2   3   6   26.17    2.22
   2   3   6   28.41    3.09
  -2   3  -6   25.59    1.86
  -2   3  -6   27.01    2.27
  -2   3  -6   22.17    1.75
   2   3   6   21.68    2.56
   5   2  -1   35.03    2.63
  -5   2   1   29.42    2.73
   5  -2  -1   28.49    2.18
   5  -2  -1   37.45    2.96
  -5  -2   1   27.69    2.30
   5  -2  -1   31.56    2.66
   5   2  -1   36.84    3.25
   5   2  -1   37.15    3.13
  -5  -2   1   37.20    2.67
  -5  -2   1   41.23    3.10
   2   0 -10   10.55    1.81
   2   0 -10    8.47    1.26
  -2   0  10   12.73    1.41
  -2   0  10    9.94    1.05
  -2   0  10   12.32    1.26
   2   0 -10   11.28    1.79
   2   0 -10   11.72    1.51
  -5   2  -1   45.49    3.56
  -5  -2  -1   50.87    3.58
  -5  -2  -1   40.55    2.83
  -5   2  -1   47.30    3.24
   5  -2   1   48.58    3.28
   5  -2   1   46.74    3.51
   5   2   1   49.21    3.92
   5  -2   1   53.24    3.71
   5   2   1   40.86    2.85
  -2   0 -10    4.88    1.31
  -2   0 -10    3.78    0.66
  -2   0 -10    5.07    1.06
   2   0  10    5.35    1.12
  -2   0 -10    5.39    0.95
   2   0  10    5.57    0.93
  -1   3   7   16.00    2.50
   1  -3  -7   21.35    1.82
  -1  -3   7   19.03    1.61
   1  -3  -7   14.75    2.22
   1  -3  -7   20.71    1.96
   1   3  -7   16.64    1.93
  -1  -3   7   21.25    1.99
   1   3  -7   22.17    2.19
  -1   4   0    4.53    0.92
   1   4   0    2.63    0.81
   1   4   0    3.65    1.74
   1  -4   0    3.77    0.98
  -1   4   0    4.78    1.57
   1  -4   0    2.94    1.09
  -1  -4   0    3.53    1.22
   1   4   0    3.16    1.31
  -1  -4   0    4.15    0.75
   1  -4   0    4.77    0.98
  -1  -4   0    4.45    0.96
  -1  -4   0    4.48    1.03
  -1   4   0    4.08    1.03
  -1   4   0    3.97    1.07
   1  -4   0    4.12    1.07
   5  -1  -5   14.19    2.24
   5   1  -5   19.92    1.75
   5  -1  -5   16.42    1.63
   5   1  -5   23.11    2.21
  -5  -1   5   22.20    1.84
   5   1  -5   20.38    2.28
   5  -1  -5   19.40    1.86
   1  -3   7   11.41    1.40
   1  -3   7   11.66    1.37
  -1   3  -7   10.37    1.20
  -1  -3  -7   10.55    1.57
  -1   3  -7   10.55    1.19
  -1   3  -7   11.35    1.49
   1   3   7   12.92    2.46
  -1  -3  -7    7.02    1.04
  -1   3  -7   11.95    1.05
  -1   3  -7   11.64    1.66
   1   3   7    5.80    1.13
  -5  -2   2   33.54    2.61
   5  -2  -2   32.91    2.64
  -5  -2   2   29.90    2.22
  -5   2   2   29.30    2.67
   5   2  -2   34.41    3.01
  -5  -2   2   36.86    2.87
   5   2  -2   32.68    2.37
   5  -2  -2   27.53    2.50
   5  -2  -2   27.44    2.50
   5   2  -2   28.66    2.56
   0   4   2    8.62    1.19
   0   4   2   11.34    2.22
   0   4  -2   14.66    2.04
   0  -4  -2   12.84    1.64
   0  -4   2   12.89    1.46
   0  -4  -2    9.30    1.19
   0   4  -2   11.81    1.35
   0   4   2   10.70    1.47
   0   4  -2    8.78    1.40
   0  -4  -2   12.00    1.63
   0   4  -2    9.70    1.16
   0   4   2    9.65    1.23
   0  -4   2   10.27    1.49
   0  -4   2   11.62    1.19
   0  -4  -2   10.61    1.32
   0  -4   2   12.98    1.36
  -1  -4   1    7.92    1.15
  -1   4   1    7.29    1.07
   1   4  -1    7.93    1.19
   1   4  -1    5.67    1.74
   1   4  -1    7.42    1.47
  -1  -4   1    7.46    1.44
   1  -4  -1    6.81    1.23
   1  -4  -1    7.29    1.13
  -1  -4   1    6.72    0.84
   1  -4  -1    4.50    1.18
  -1  -4   1    6.79    1.01
  -1   4   1    7.41    1.24
   1  -4  -1    8.13    1.17
  -1   4   1    6.94    1.18
  -1   4   1    7.16    1.87
   1   4   1   12.10    1.99
   1   4   1   18.48    1.76
  -1   4  -1   19.80    1.82
  -1   4  -1   14.31    1.56
  -1  -4  -1   16.42    1.64
   1  -4   1   18.16    1.82
   1   4   1   18.32    1.85
  -1   4  -1   15.48    2.00
  -1  -4  -1   16.81    1.81
  -1  -4  -1   11.93    1.65
   1  -4   1   15.55    1.89
   1   4   1   17.59    2.13
  -1   4  -1   16.48    1.76
   1  -4   1   17.18    1.70
   1  -4   1   15.53    1.53
   5   2   2   29.19    3.07
  -5  -2  -2   24.71    2.44
   5   2   2   25.83    2.25
   5  -2   2   25.32    2.18
  -5  -2  -2   27.16    2.33
  -5   2  -2   24.20    2.14
  -5   2  -2   21.75    2.21
   5  -2   2   26.24    2.42
  -5   2  -2   23.64    2.18
   5  -2   2   26.41    2.30
  -5  -2  -2   25.23    2.32
  -4   3   0    7.15    1.47
  -4  -3   0    6.96    1.36
  -4   3   0    7.49    1.21
   4  -3   0    6.82    1.38
  -4  -3   0    5.70    0.96
   4  -3   0    6.17    0.98
   4  -3   0    6.95    1.19
  -4   3   0    8.62    1.13
   4   3   0    4.66    1.59
  -4   3   0    6.29    0.92
   4   3   0    8.39    1.78
   4   0  -8    0.83    1.11
   4   0  -8    0.92    1.30
  -4   0   8    3.41    1.03
   4   0  -8    3.42    1.22
   4  -2  -6    6.54    1.35
   4  -2  -6    4.44    1.68
   4  -2  -6    4.56    1.57
   4   2  -6    2.76    1.38
  -4  -2   6    5.75    1.03
   4   2  -6    4.74    1.04
   4   2  -6    5.15    1.48
  -4   2   6    3.77    1.11
   5   1   5   25.70    2.80
  -5  -1  -5   23.40    2.09
  -5   1  -5   24.53    2.20
  -5   1  -5   23.37    2.35
  -5  -1  -5   21.13    2.33
   5  -1   5   25.95    2.36
   5   1   5   24.71    2.43
   5  -1   5   24.15    2.06
   5   1   5   17.44    1.70
  -5  -1  -5   26.13    2.78
  -5   1  -5   24.09    2.50
   3   1  -9   42.53    3.36
   3  -1  -9   44.27    3.56
   3   1  -9   40.03    3.67
   3  -1  -9   45.05    3.86
  -3  -1   9   42.40    3.29
  -3   1   9   41.41    3.44
   3  -1  -9   24.87    3.23
  -4  -3   1   12.22    1.32
  -4   3   1   13.38    1.52
   4  -3  -1   11.97    1.41
  -4   3   1   13.14    2.09
   4   3  -1    9.66    1.19
  -4   3   1   14.27    1.50
  -4   3   1   10.67    1.28
   4  -3  -1   13.94    1.88
   4   3  -1    9.60    2.03
   4  -3  -1   12.92    1.47
   4   3  -1   16.80    2.26
  -3   3   5    3.07    0.97
   3   3  -5    5.55    1.49
   3  -3  -5    7.08    1.67
  -3  -3   5    8.19    1.08
  -3   3   5    3.61    1.65
  -3  -3   5    5.99    1.43
   3  -3  -5    6.65    1.11
   3  -3  -5    6.15    1.33
   3   3  -5    6.42    0.89
   3  -3  -5    6.51    1.35
  -3  -3   5    7.86    1.25
  -4   3  -1   11.90    1.32
   4  -3   1   13.88    1.47
  -4   3  -1   15.54    1.62
  -4  -3  -1   14.87    1.72
  -4   3  -1   16.29    1.52
   4   3   1   11.10    1.97
   4  -3   1   13.40    1.65
   4  -3   1   15.38    1.54
  -4  -3  -1   11.70    1.45
  -4   3  -1   18.00    1.90
  -4  -3  -1   12.34    1.34
   4   3   1   12.63    2.06
   4   2   6   10.73    1.52
   4   2   6   14.58    2.47
  -4   2  -6   14.95    1.46
  -4   2  -6   15.86    1.94
  -4  -2  -6   15.07    1.65
   4  -2   6   15.11    1.43
  -4   2  -6   15.34    1.60
   4  -2   6   19.72    1.91
  -3   3  -5   13.22    1.61
   3   3   5    9.51    1.70
  -3  -3  -5    7.31    1.26
  -3   3  -5    8.93    1.12
   3  -3   5   10.89    1.14
  -3  -3  -5   11.87    1.47
   3   3   5   12.01    2.53
  -3  -3  -5    9.56    1.16
   4   0   8   28.54    2.79
  -4   0  -8   21.07    2.14
   4   0   8   28.32    2.45
  -4   0  -8   26.47    2.83
  -4   0  -8   23.43    2.24
  -4   0  -8   24.86    2.08
   1   4  -2    2.52    0.98
  -1   4   2    2.31    1.96
   1  -4  -2    1.70    1.12
   1   4  -2    2.08    1.25
  -1   4   2    1.66    0.86
   1  -4  -2    2.49    0.92
  -1   4   2    2.62    0.94
  -1   4   2    2.74    1.07
   1  -4  -2    2.88    0.98
  -1  -4   2    3.42    0.94
   1   4  -2    3.00    1.66
   1  -4  -2    2.09    1.08
  -1  -4   2    2.63    0.77
  -1  -4   2    2.35    1.22
   5   0  -6   28.43    2.39
   5   0  -6   27.34    2.52
   5   0  -6   29.36    3.23
  -1   4  -2   22.36    2.39
   1  -4   2   20.31    2.12
   1   4   2   22.17    2.77
   1  -4   2   18.83    1.81
  -1  -4  -2   14.73    1.50
  -1   4  -2   18.84    1.73
   1   4   2   22.56    2.45
  -1  -4  -2   13.95    1.79
  -1  -4  -2   18.14    1.81
  -1   4  -2   23.08    2.16
  -1   4  -2   19.13    1.84
   1   4   2   21.30    2.04
   1  -4   2   18.54    1.65
   1  -4   2   21.82    2.06
  -3   1  -9   35.45    3.19
  -3  -1  -9   34.64    2.97
  -3   1  -9   35.79    3.00
   3   1   9   36.12    2.99
  -3   1  -9   36.22    3.07
  -3  -1  -9   31.93    2.80
  -3  -1  -9   34.78    2.77
  -3   1  -9   33.67    2.62
   3  -1   9   35.03    2.72
  -3   1  -9   35.79    2.76
   3   1   9   34.74    2.79
   2   1 -10    5.89    0.96
   2   1 -10    6.98    1.26
   2  -1 -10    4.15    1.95
   2   1 -10    6.54    1.64
   2  -1 -10    7.40    1.45
  -2  -1  10    7.00    1.37
  -2  -1  10    6.36    1.08
   2  -1 -10    3.33    1.40
   4  -3  -2   12.37    1.87
   4   3  -2   11.31    2.00
   4   3  -2    8.16    1.05
  -4   3   2   10.65    1.26
  -4   3   2    9.41    1.82
   4  -3  -2   10.44    1.38
  -4   3   2   12.00    1.41
   4  -3  -2    9.18    1.21
  -4  -3   2   11.34    1.25
  -4  -3   2   12.14    1.53
  -4   3   2    9.75    1.22
   4   3  -2   10.15    1.95
  -5   2   3    8.47    1.08
  -5  -2   3   10.85    1.54
   5   2  -3   11.46    1.83
   5  -2  -3    7.73    1.26
   5   2  -3    9.75    1.26
  -5  -2   3   11.37    1.32
   5   2  -3    9.37    1.86
  -5   2   3    9.63    1.61
   5  -2  -3    7.28    1.61
   0   4  -3   13.52    1.76
   0  -4  -3   13.40    1.50
   0  -4  -3   10.79    1.72
   0   4  -3   12.97    1.97
   0  -4   3   14.94    1.77
   0  -4   3   12.96    1.42
   0   4  -3   13.14    1.45
   0  -4  -3    9.86    1.44
   0   4   3   15.09    2.47
   0  -4  -3   15.54    1.67
   0   4   3   11.20    1.45
   0   4   3   13.36    1.78
  -4  -3  -2   45.11    3.65
   4  -3   2   46.44    3.75
  -4   3  -2   50.25    3.96
   4   3   2   36.75    3.67
   4  -3   2   41.63    3.21
   4  -3   2   47.62    3.71
  -4  -3  -2   49.79    3.91
  -4  -3  -2   43.87    3.35
  -4   3  -2   38.36    3.07
   4   3   2   46.93    4.10
  -4   3  -2   33.82    2.65
  -4   3  -2   47.61    3.54
  -6   0   0   31.22    2.95
  -6   0   0   26.29    2.38
   6   0   0   34.94    2.80
   6   0   0   29.37    2.87
   6   0   0   30.11    2.86
   0   0 -11    7.55    1.09
   0   0  11    7.45    1.23
   0   0 -11    6.74    1.32
   0   0  11    6.20    0.93
   0   0 -11    6.96    1.54
   0   0  11    6.68    1.04
  -5   0  -6    2.45    1.27
  -5   0  -6    1.76    1.68
   5   0   6    2.06    1.08
  -5   0  -6    1.50    0.99
   5   0   6    1.97    1.47
   2   1  10   21.85    2.40
  -2  -1 -10   22.70    2.15
   2   1  10   23.07    1.99
  -2   1 -10   23.23    1.89
  -2  -1 -10   25.45    2.15
  -2   1 -10   26.18    2.36
   2   1  10   28.24    2.42
  -2   1 -10   26.89    2.32
  -2  -1 -10   25.26    2.29
  -2   1 -10   25.95    2.45
   2  -1  10   26.58    2.14
  -3  -2   8    6.20    1.42
  -3  -2   8    5.53    0.99
  -3   2   8    5.61    1.20
   3  -2  -8    3.01    1.63
  -3   2   8    1.58    1.36
   3  -2  -8    6.79    1.46
   3   2  -8    6.24    1.63
   3   2  -8    6.07    1.03
   3   2  -8    4.82    1.21
  -5  -2  -3    6.12    1.22
   5  -2   3    7.72    1.06
   5   2   3    8.86    2.13
   5  -2   3    7.68    1.25
   5   2   3    5.44    1.01
  -5  -2  -3    6.64    1.53
  -5   2  -3    7.20    1.42
  -5   2  -3    7.51    1.19
   5  -2   3    7.26    1.11
   2  -2  -9   56.59    4.58
  -2  -2   9   59.38    4.59
   2   2  -9   45.82    3.89
   2  -2  -9   59.01    4.53
  -2  -2   9   52.92    3.97
  -2   2   9   53.01    4.89
   2  -2  -9   47.07    4.66
  -2   2   9   40.08    5.19
   2   2  -9   54.77    4.13
   2   2  -9   44.25    3.29
   6   0  -1   18.61    2.06
   6   0  -1   37.37    2.98
   6   0  -1   30.26    2.82
   6   0   1    1.13    1.45
  -6   0  -1    1.12    1.06
  -6   0  -1    0.61    1.31
   6   0   1    1.73    1.36
   6   0   1    1.71    0.94
   2   2   9   11.97    1.41
  -2   2  -9   14.78    1.36
  -2  -2  -9   14.41    1.84
  -2   2  -9   14.52    1.51
   2   2   9   13.97    1.71
  -2   2  -9   14.63    1.71
  -2  -2  -9   15.48    1.59
   2   2   9   14.45    2.50
  -3   2  -8   -0.01    1.04
   3   2   8    0.03    0.89
   3   2   8   -0.02    1.19
  -3  -2  -8    0.68    0.92
  -3   2  -8   -0.13    0.86
  -3  -2  -8    1.53    1.28
  -3   2  -8    0.46    0.59
   4   1  -8   12.43    1.46
   4  -1  -8    6.52    1.90
  -4   1   8    6.60    1.23
   4   1  -8    7.65    1.62
  -4  -1   8   12.66    1.41
   4  -1  -8   13.84    1.72
   4   1  -8   13.28    1.75
   4  -1  -8   10.80    1.92
  -1  -4   3    1.95    1.10
  -1   4   3    2.46    1.87
   1   4  -3    2.52    1.61
   1   4  -3    3.13    1.02
  -1   4   3    2.31    0.99
  -1   4   3    2.41    0.97
  -1  -4   3    2.81    0.95
   1  -4  -3    3.32    1.01
   1  -4  -3    3.50    1.18
   1  -4  -3    3.56    1.19
   1  -4  -3    2.28    0.84
   1   4  -3    3.09    1.34
  -1   0  11    3.24    0.86
  -1   0  11    2.09    0.76
   1   0 -11    1.87    0.84
  -1   0  11    3.35    1.03
   1   0 -11    3.65    1.52
   1   0 -11    3.06    1.18
   1  -4   3    1.51    0.67
  -1  -4  -3    1.10    0.97
   1   4   3    2.24    0.97
  -1   4  -3    1.06    0.78
   1  -4   3    1.48    1.01
   1  -4   3    1.55    0.81
  -1   4  -3    1.06    0.69
   1   4   3   -0.27    1.96
  -1   4  -3    1.99    1.37
   1   4   3    1.23    1.09
  -1  -4  -3    2.44    1.01
   6   0  -2    6.49    1.48
   6   0  -2    6.78    1.66
   6   0  -2    7.11    1.27
  -2  -3   7    2.84    1.27
   2   3  -7    0.06    1.17
  -2  -3   7    1.86    0.86
   2   3  -7    1.38    1.25
  -2  -3   7    1.81    0.77
   2  -3  -7    1.73    1.08
  -2   3   7    1.59    0.98
  -2   3   7    1.69    1.79
   2  -3  -7    2.92    1.55
   1   0  11   14.52    1.62
  -1   0 -11   15.12    1.78
   1   0  11   15.32    1.53
  -1   0 -11   12.82    1.47
  -1   0 -11   13.60    1.84
   1   0  11   13.90    1.34
  -2   4   0    0.37    0.77
   2  -4   0    0.22    1.02
   2  -4   0    0.77    0.78
   2   4   0    1.32    1.30
  -2   4   0    0.87    0.89
   2  -4   0    0.98    0.88
   2  -4   0    1.12    0.83
  -2  -4   0    0.36    0.66
  -2  -4   0    0.53    0.84
  -2  -4   0    0.79    0.97
  -2   4   0   -0.38    1.41
   2   4   0   -0.27    1.77
  -2  -4   0    0.66    1.15
  -4   3   3    1.85    1.57
   4   3  -3    1.52    1.24
   4  -3  -3    2.05    0.79
   4   3  -3    2.08    0.74
   4  -3  -3    3.29    1.12
  -4  -3   3    3.53    0.91
   4   3  -3    2.45    1.36
  -4   3   3    2.75    0.92
  -4  -3   3    3.80    1.15
   4  -3  -3    2.32    1.39
   6   0   2    2.44    0.95
  -6   0  -2    0.88    1.31
  -6   0  -2    1.34    1.20
   6   0   2    1.03    1.24
   6   0   2    1.62    1.57
  -2  -3  -7   11.26    1.68
  -2  -3  -7   11.17    1.40
   2   3   7   10.27    2.42
  -2   3  -7   11.07    1.46
  -2   3  -7   11.96    1.44
   2   3   7   12.26    1.67
  -4   1  -8   31.61    2.82
  -4   1  -8   31.96    3.00
   4   1   8   30.51    3.11
   4   1   8   24.12    2.20
  -4  -1  -8   30.78    2.81
  -4   1  -8   29.48    2.35
  -4   1  -8   28.69    2.35
  -4  -1  -8   27.27    2.62
   4  -1   8   31.79    2.57
   4   1   8   31.68    2.75
  -4  -1  -8   27.15    2.27
  -4  -3  -3   26.98    2.41
   4  -3   3   23.77    2.22
  -4   3  -3   21.47    1.84
  -4   3  -3   18.00    1.73
   4  -3   3   23.66    1.98
  -4  -3  -3   21.60    1.98
   4   3   3   21.11    2.63
  -4   3  -3   25.78    2.37
  -4  -3  -3   17.54    1.82
   5   1  -6    2.21    0.99
   5   1  -6    2.13    1.24
   5  -1  -6    1.10    0.95
   5  -1  -6    0.76    1.36
   5  -1  -6    1.78    1.16
  -5  -1   6    2.33    0.94
   5   1  -6   -0.16    1.30
  -2  -4   1   33.54    2.74
  -2   4   1   25.65    2.27
   2  -4  -1   27.36    2.43
  -2  -4   1   19.75    2.42
   2   4  -1   28.43    2.91
  -2  -4   1   29.21    2.35
   2  -4  -1   21.83    2.42
  -2  -4   1   27.68    2.39
   2  -4  -1   22.06    1.97
   2  -4  -1   27.22    2.38
   2   4  -1   29.04    3.02
  -2   4   1   32.90    3.26
  -2   4   1   26.24    2.37
  -2   4  -1    6.28    1.13
  -2  -4  -1    5.89    0.93
   2   4   1    4.76    1.73
   2  -4   1    8.03    1.25
  -2   4  -1    7.82    1.56
   2  -4   1    6.18    0.97
  -2  -4  -1    7.02    1.16
  -2  -4  -1    7.69    1.28
   2   4   1    5.61    1.52
  -2   4  -1    6.84    1.08
   2  -4   1    4.68    1.10
   2  -4   1    5.65    0.98
   0   3  -8   24.25    1.96
   0   3  -8   22.95    2.24
   0   3   8   22.35    2.40
   0   3   8   14.80    2.80
   0  -3  -8   24.36    2.38
   0  -3   8   26.10    2.39
   0   3  -8   26.65    2.59
   0  -3   8   23.24    1.97
   0  -3  -8   23.99    2.15
  -5   2   4    4.09    0.95
   5  -2  -4    3.88    1.04
  -5   2   4    3.39    1.37
  -5  -2   4    4.14    1.14
  -5  -2   4    4.43    0.96
   5   2  -4    4.32    0.95
   5   2  -4    5.61    1.70
   5  -2  -4    5.00    1.56
   5   2  -4    4.81    1.53
   0   4   4   18.11    2.66
   0  -4   4   13.76    1.45
   0  -4  -4   19.17    1.96
   0   4   4   16.54    1.75
   0  -4  -4   15.38    1.67
   0  -4   4   13.82    1.64
   0   4   4   15.44    1.76
   0   4  -4   19.84    2.24
   0   4  -4   17.25    1.89
   0   4  -4   18.47    1.82
   0   2 -10   30.55    2.45
   0   2  10   28.35    3.07
   0   2 -10   30.10    2.53
   0  -2 -10   31.46    2.76
   0   2 -10   31.45    2.91
   0  -2  10   29.31    2.49
   0  -2 -10   29.23    2.44
   6   1   0    5.34    1.05
   6   1   0    6.17    1.53
  -6  -1   0    5.08    1.23
   6   1   0    5.72    1.53
  -6  -1   0    3.19    1.06
   6  -1   0    5.88    1.45
  -6   1   0    3.27    1.30
   6  -1   0    4.53    0.83
   0  -1  11    8.04    1.02
   0   1  11   10.03    1.50
   0   1 -11    9.12    1.55
   0   1 -11    9.59    1.15
   0   1  11    9.05    1.14
   0   1  11   11.94    1.95
   0  -1  11   10.69    1.38
   0   1 -11   10.33    1.38
   0  -1 -11   11.56    1.55
   0  -1  11   11.23    1.20
  -5  -1  -6   25.68    2.64
  -5   1  -6   29.26    2.69
  -5   1  -6   33.69    3.18
   5  -1   6   32.83    2.61
   5   1   6   35.15    3.38
   5   1   6   30.46    2.74
  -5   1  -6   32.19    2.63
  -5  -1  -6   33.08    3.30
  -5  -1  -6   32.05    2.67
  -5  -1  -6   32.66    2.96
   5  -1   6   32.49    2.74
   3   3  -6   18.69    2.50
  -3   3   6   14.68    2.50
   3  -3  -6   21.96    2.20
   3  -3  -6   20.90    2.29
   3  -3  -6   18.67    2.61
  -3  -3   6   22.77    1.93
  -3   3   6   19.63    2.49
  -3  -3   6   23.68    2.17
   3   3  -6   22.79    1.94
  -3  -3   6   22.57    2.34
   5  -2   4    3.10    0.87
  -5  -2  -4    1.07    1.13
  -5   2  -4    2.95    0.96
   5   2   4    2.72    1.46
   5  -2   4    2.62    1.00
  -5  -2  -4    2.25    0.91
   5   2   4    2.92    2.01
   6   1  -1    0.81    1.48
  -6  -1   1    0.71    0.90
   6   1  -1    1.70    0.93
   6  -1  -1    0.86    0.88
   6  -1  -1    1.22    0.71
  -6   1   1    1.97    1.26
   6  -1  -1    1.05    1.38
   6   1  -1   -0.13    1.42
  -2   4   2    2.37    0.86
   2  -4  -2    2.32    1.00
   2   4  -2    1.09    1.67
  -2   4   2    4.98    1.96
   2   4  -2    4.71    1.12
  -2  -4   2    3.04    1.03
   2  -4  -2    3.49    0.97
  -2  -4   2    2.19    1.24
  -2  -4   2    3.61    0.89
   2  -4  -2    2.65    0.99
   2  -4  -2    4.14    1.21
   2   4  -2    2.39    1.42
  -2   4   2    1.48    0.92
   6   1   1    5.71    1.55
   6  -1   1    3.76    0.75
  -6  -1  -1    5.75    1.32
   6  -1   1    5.42    1.37
   6   1   1    5.67    1.04
  -6   1  -1    4.00    1.31
  -6  -1  -1    4.73    1.24
   6   1   1    5.87    1.61
   2  -4   2   44.55    3.59
   2   4   2   44.30    5.14
  -2  -4  -2   43.26    3.73
  -2  -4  -2   57.64    4.52
  -2   4  -2   42.74    3.45
  -2   4  -2   63.23    5.40
   2   4   2   53.43    4.76
   2  -4   2   45.90    3.47
   2  -4   2   44.98    3.56
  -2  -4  -2   36.31    2.98
   3   0 -10    0.09    1.16
   3   0 -10   -0.74    1.18
   3   0 -10    0.34    1.51
   6   0  -3   17.49    2.38
   6   0  -3   19.65    2.10
   6   0  -3   19.84    2.01
  -3  -3  -6   37.18    3.03
   3  -3   6   38.35    2.92
  -3   3  -6   38.14    3.17
  -3   3  -6   32.41    2.59
  -3  -3  -6   25.76    2.35
   3   3   6   38.90    3.94
   4  -2  -7    8.27    1.90
   4   2  -7    9.78    1.92
  -4   2   7   10.23    1.40
   4   2  -7    8.02    1.51
   4  -2  -7    5.76    1.49
   4  -2  -7   10.26    1.55
  -4  -2   7    9.49    1.18
   4   2  -7    9.12    1.20
  -1  -3   8   27.80    2.32
   1  -3  -8   29.91    2.52
  -1   3   8   27.71    3.34
   1   3  -8   31.50    2.43
  -1  -3   8   34.82    2.98
   1   3  -8   24.31    2.36
   1  -3  -8   25.63    2.44
   1   3  -8   27.93    2.61
   1  -3  -8   27.88    3.02
  -1   3  -8    1.56    1.35
  -1  -3  -8    2.20    1.18
  -1  -3  -8    1.01    0.98
   1   3   8    1.88    1.22
   1  -3   8    2.13    0.71
   1   3   8    3.47    2.11
   6   0   3   23.13    2.54
  -6   0  -3   17.51    1.89
  -6   0  -3   16.78    1.97
   6   0   3   20.73    2.15
   6   0   3   17.30    1.66
  -6   0  -3   20.71    2.26
  -1  -4   4   33.56    2.95
   1  -4  -4   26.41    2.36
  -1  -4   4   31.12    2.59
   1   4  -4   33.81    3.26
   1  -4  -4   35.19    2.97
  -1   4   4   26.43    2.63
   1   4  -4   34.09    3.19
   1  -4  -4   29.96    2.74
  -1   4   4   31.73    3.35
  -1   4   4   25.32    2.37
  -1  -2  10    2.65    1.08
   1   2 -10    2.01    1.37
   1  -2 -10    2.93    1.37
   1   2 -10    2.78    0.73
  -1  -2  10    3.03    0.91
  -1   2  10    1.96    1.49
   1   2 -10    3.14    1.01
   1   1 -11   13.44    1.86
  -1   1  11    7.95    1.17
   1   1 -11   11.10    1.27
  -1   1  11   13.94    1.40
  -1  -1  11   13.12    1.43
  -1   1  11    6.14    1.50
   1   1 -11   12.99    1.55
   1  -1 -11   13.00    1.73
  -1  -1  11   12.41    1.22
   1  -1 -11   13.50    1.99
  -1  -4  -4    5.96    1.17
   1  -4   4    4.96    1.11
   1   4   4    5.80    1.50
  -1   4  -4    4.99    1.37
   1   4   4    4.43    1.93
  -1   4  -4    4.85    0.97
   1  -4   4    5.33    0.92
  -1   4  -4    5.53    0.99
   1  -4   4    4.58    0.82
   1   4   4    4.28    1.11
   3   0  10   57.60    4.29
   3   0  10   57.78    4.31
  -3   0 -10   63.13    5.11
  -3   0 -10   58.81    4.50
  -3   0 -10   61.45    5.15
   3   0  10   60.97    5.19
  -6   1   2   10.07    1.79
   6  -1  -2   14.73    1.67
   6  -1  -2   13.12    1.94
   6   1  -2   14.26    1.53
   6   1  -2   11.56    1.70
   6  -1  -2   11.63    1.31
  -6  -1   2   11.51    1.52
  -1  -2 -10   40.89    3.37
   1  -2  10   48.69    3.68
   1  -2  10   43.04    3.36
   1   2  10   43.43    3.46
  -1   2 -10   46.80    3.84
  -1   2 -10   44.37    3.46
  -1  -2 -10   40.41    3.22
  -1   2 -10   36.94    2.79
   1   2  10   48.64    4.24
  -4  -2  -7    2.17    0.88
   4   2   7    1.04    2.02
   4  -2   7    2.56    0.81
   4   2   7    2.01    1.28
  -4   2  -7    2.62    1.37
  -4   2  -7    1.98    0.83
   1  -1  11   11.73    1.19
  -1   1 -11   12.88    1.73
  -1   1 -11   13.16    1.42
   1  -1  11   11.19    1.41
  -1  -1 -11   11.65    1.31
   1  -1  11   12.66    1.27
  -1   1 -11   12.07    1.51
   1   1  11    8.69    1.09
  -1  -1 -11   11.98    1.66
   1   1  11   11.55    2.01
   1   1  11   11.86    1.55
   5   0  -7    6.90    1.80
   5   0  -7    7.11    1.27
   5   0  -7    3.60    1.26
   5   0  -7    6.31    1.27
  -4  -3   4    3.44    0.98
   4   3  -4    5.36    1.63
   4   3  -4    4.86    0.87
  -4   3   4    3.31    1.49
  -4  -3   4    5.10    0.93
   4   3  -4    2.91    1.30
   4  -3  -4    5.32    1.20
   4  -3  -4    3.11    0.90
   4  -3  -4    4.39    1.55
  -4   3   4    4.06    1.03
   6   1   2    0.98    1.38
  -6   1  -2    1.61    1.15
  -6  -1  -2    2.04    1.27
   6   1   2    1.18    1.68
  -6  -1  -2    2.86    1.14
   6  -1   2    1.98    0.68
   6   1   2    2.30    0.94
   6  -1   2    1.42    1.17
  -4  -3  -4    6.26    1.08
   4  -3   4    8.49    1.31
   4   3   4    8.46    1.73
   4  -3   4    8.53    1.17
  -4  -3  -4    7.33    1.42
  -4   3  -4    8.17    1.38
  -4   3  -4    7.93    1.33
   4  -3   4    7.93    1.02
  -4   3  -4    7.32    1.09
   4   0  -9    2.12    1.57
   4   0  -9    1.93    1.11
   4   0  -9    1.67    1.34
   2   0 -11   -0.57    1.41
  -2   0  11   -0.28    0.68
   2   0 -11   -0.88    1.13
  -2   0  11   -0.03    0.80
  -2  -4   3    8.01    1.05
  -2   4   3    6.40    1.17
   2  -4  -3    7.24    1.18
  -2   4   3    5.24    1.89
  -2  -4   3    9.45    1.29
   2  -4  -3    5.31    1.18
   2  -4  -3    7.14    1.23
   2   4  -3    7.88    1.59
  -2  -4   3    7.89    1.46
   2  -4  -3    7.18    1.22
  -2  -4   3    8.82    1.09
   2   4  -3    7.99    1.86
   5   0   7    9.61    1.79
  -5   0  -7    8.19    1.20
   5   0   7    9.42    1.35
  -5   0  -7    8.76    1.97
  -5   0  -7    8.33    1.49
  -2  -4  -3   39.82    3.22
  -2   4  -3   69.06    5.79
   2   4   3   38.92    3.68
  -2   4  -3   59.16    4.49
  -2  -4  -3   54.66    4.26
   2   4   3   38.57    3.34
   2  -4   3   54.25    4.02
   2  -4   3   62.85    5.12
   2   0  11    3.93    0.83
  -2   0 -11    4.19    1.03
  -2   0 -11    4.70    1.16
   2   0  11    4.08    0.93
  -2   0 -11    4.20    0.87
  -4   0  -9   14.07    1.74
   4   0   9   13.69    1.48
  -4   0  -9   11.31    1.54
   4   0   9   14.73    2.07
  -4   0  -9   12.66    1.35
   5  -2  -5    1.37    1.26
   5   2  -5    2.75    1.51
   5  -2  -5    1.81    1.04
   5   2  -5    1.68    1.37
  -5   2   5    1.07    0.84
  -5  -2   5    1.81    0.88
   5   2  -5    1.77    0.95
   6   0  -4    7.08    1.29
   6   0  -4    6.52    1.29
   6   0  -4    3.06    1.38
   3  -1 -10   42.54    3.45
   3   1 -10   41.46    3.32
   3  -1 -10   26.98    3.71
  -3  -1  10   41.91    3.27
   3  -1 -10   42.39    3.86
   6  -1  -3    8.36    1.77
   6   1  -3    6.61    1.38
   6   1  -3    4.40    0.94
   6  -1  -3    7.16    1.32
   0   4   5   11.33    2.52
   0  -4  -5   12.83    1.60
   0  -4   5   14.06    1.42
   0   4  -5   12.09    1.60
   0  -4   5   12.70    1.57
   0   4  -5   13.55    1.76
   0   4   5   14.87    1.65
   0   4   5    9.01    1.33
   6  -1   3   11.01    1.14
  -6   1  -3   12.58    1.73
   6   1   3    9.53    1.16
  -6  -1  -3   12.41    1.72
   6   1   3   12.32    1.93
  -6  -1  -3   14.10    1.64
   6   1   3    8.34    1.43
   6  -1   3   13.20    1.62
   6  -1   3   13.58    1.45
   5   2   5   29.79    2.77
   5  -2   5   28.66    2.32
  -5  -2  -5   21.44    1.95
  -5   2  -5   23.51    2.16
   5   2   5   29.97    3.27
  -5  -2  -5   26.92    2.58
   5  -2   5   27.83    2.45
  -6   0  -4    0.74    1.29
   6   0   4    1.06    0.76
  -6   0  -4    1.66    1.00
   6   0   4    2.15    1.22
   6   0   4    1.87    1.55
  -6   0  -4    1.67    1.59
   3   2  -9   16.60    2.35
  -3   2   9   20.34    1.98
   3  -2  -9   14.33    1.66
  -3  -2   9   18.27    1.70
   3   2  -9   16.47    1.68
   3   2  -9   14.73    1.80
   3  -2  -9   13.05    2.32
   3   1  10    8.13    1.16
  -3  -1 -10   10.35    1.51
  -3  -1 -10    8.57    1.42
  -3  -1 -10   12.10    1.37
   3  -1  10   11.87    1.21
  -3   1 -10   12.71    1.59
  -3   1 -10   12.34    1.25
   3   1  10   11.86    1.47
   5   1  -7   11.95    1.62
   5  -1  -7    6.93    1.70
   5   1  -7    9.77    1.70
   5   1  -7   15.47    1.62
   5  -1  -7   12.94    1.55
  -2  -3   8    6.44    1.08
   2   3  -8    7.97    1.54
  -2   3   8    6.12    1.95
   2  -3  -8    7.82    1.88
   2   3  -8    6.36    1.33
  -2   3   8    6.90    1.48
  -2  -3   8    8.32    1.41
  -1  -4   5   27.35    2.36
   1  -4  -5   32.81    2.96
   1   4  -5   35.92    3.24
   1  -4  -5   25.89    2.55
  -1  -4   5   36.92    3.15
   1   4  -5   22.16    2.41
   1  -4  -5   27.06    2.58
  -1   4   5   28.74    3.49
  -3   2  -9   20.51    1.80
  -3  -2  -9   22.36    2.30
  -3   2  -9   23.06    2.14
   3   2   9   24.00    2.27
  -3  -2  -9   22.88    2.06
  -1   4  -5    7.10    1.47
   1   4   5    4.80    2.28
   1  -4   5    5.05    0.86
   1   4   5    3.92    1.36
   1   4   5    4.81    1.18
  -1  -4  -5    3.73    1.18
  -4   1   9    3.24    0.98
   4   1  -9    2.41    1.07
  -4  -1   9    2.27    0.90
   4  -1  -9    1.81    1.62
   4   1  -9    2.94    1.71
   4  -1  -9    2.13    1.05
   4  -1  -9    0.30    1.45
   4   1  -9    2.98    1.25
  -2  -2  10   22.64    2.40
   2  -2 -10   16.14    2.74
  -2  -2  10   24.53    2.11
   2  -2 -10   22.45    2.77
  -2   2  10   19.48    2.73
   2  -2 -10   26.35    2.65
   2   2 -10   21.69    2.53
  -2   2  10   22.80    2.64
   2   2 -10   20.64    1.88
   2   2 -10   23.77    2.26
   2   1 -11    8.66    1.41
  -2  -1  11    9.63    1.29
   2  -1 -11    7.90    1.84
  -2   1  11    6.89    1.29
   2  -1 -11   10.81    1.66
   2   1 -11    5.21    1.35
  -2   4   4    1.84    1.01
   2  -4  -4    1.87    0.95
   2  -4  -4    1.87    1.08
  -2  -4   4    2.30    0.91
   2  -4  -4    0.89    1.10
  -2   4   4    0.44    1.75
   2   4  -4    1.08    1.32
   2   4  -4    2.79    1.60
  -2  -4   4    0.53    1.14
   2   3   8    3.91    2.28
  -2  -3  -8    5.53    1.17
  -2  -3  -8    4.53    1.24
   2   3   8    4.92    1.43
  -2   3  -8    5.05    1.00
  -4  -3   5    5.70    0.99
   4   3  -5    5.41    1.59
   4   3  -5    6.33    1.67
  -4   3   5    2.53    0.86
   4   3  -5    4.36    0.85
   4  -3  -5    3.81    0.99
  -4   3   5    2.86    1.41
  -4  -3   5    4.42    1.22
   4  -3  -5    5.66    1.67
   4  -3  -5    5.19    1.31
   5  -1   7   10.22    1.36
  -5  -1  -7    9.28    1.30
   5   1   7    8.12    1.46
  -5  -1  -7    9.23    1.56
   5  -1   7    7.51    1.00
  -5   1  -7    9.38    1.75
   5   1   7    8.45    1.82
  -5   1  -7    9.27    1.21
  -3  -3   7   16.64    1.89
  -3   3   7   10.66    2.25
   3  -3  -7   14.63    2.19
  -3  -3   7   12.22    1.90
  -3  -3   7   15.21    1.56
   3  -3  -7   13.73    1.84
   3   3  -7   16.43    2.33
  -3   3   7   12.94    1.86
   3  -3  -7   15.67    2.22
  -2   4  -4    7.57    1.44
   2  -4   4    6.19    0.89
   2   4   4    8.79    2.48
   2  -4   4    6.30    0.88
  -2  -4  -4    7.62    1.35
   2   4   4    4.61    1.34
   3  -4   0    1.91    0.95
  -3   4   0    0.70    0.76
  -3   4   0    1.63    0.88
   3   4   0    1.57    1.88
  -3   4   0    2.50    1.56
  -3  -4   0    0.08    0.89
  -3  -4   0    1.10    0.67
  -3   4   0    1.94    0.93
   3   4   0   -0.49    1.46
   3  -4   0    1.99    0.84
  -3  -4   0    1.36    0.94
   3  -4   0    2.59    1.14
   3  -4   0    1.84    1.01
   2   2  10    4.24    2.12
   2   2  10    2.46    0.98
  -2   2 -10    5.34    1.11
  -2   2 -10    5.25    0.81
  -2  -2 -10    5.14    1.36
  -2  -2 -10    4.67    1.05
  -2  -1 -11   41.93    3.53
  -2   1 -11   41.36    3.62
  -2   1 -11   39.60    3.26
   2   1  11   34.00    3.28
   2  -1  11   42.94    3.56
   2   1  11   40.68    3.43
  -2  -1 -11   44.14    3.91
  -2   1 -11   41.60    3.72
   4  -3   5    2.49    0.76
  -4  -3  -5    3.29    1.11
  -4   3  -5    2.47    0.86
  -4  -3  -5    2.23    1.30
  -4   3  -5    2.14    1.08
   4   3   5    2.14    1.21
   3  -4  -1   27.76    2.83
  -3   4   1   21.10    2.01
  -3  -4   1   34.36    3.11
   3   4  -1   31.20    3.26
   3  -4  -1   22.31    2.33
  -3   4   1   25.28    2.39
   3  -4  -1   24.83    2.32
  -3  -4   1   27.81    2.51
  -3   4   1   33.30    3.46
  -3  -4   1   27.59    2.59
  -3   4   1   23.11    2.52
   3  -4  -1   25.69    2.45
   3   4  -1   32.97    3.44
  -3  -3  -7   20.35    2.09
   3   3   7   11.29    2.22
  -3   3  -7   22.50    2.32
  -3  -3  -7   13.56    1.74
  -3   3  -7   22.07    2.20
  -3  -4  -1   29.65    2.78
  -3  -4  -1   35.15    3.22
   3   4   1   24.68    3.41
   3  -4   1   29.74    2.89
  -3   4  -1   36.98    3.53
   3  -4   1   30.01    2.67
  -3  -4  -1   26.73    2.44
   3  -4   1   31.34    3.03
  -3   4  -1   28.49    2.63
   3   4   1   35.02    3.71
  -3   4  -1   28.46    2.60
  -3   4  -1   29.97    2.74
  -4  -1  -9   28.93    2.85
  -4  -1  -9   30.50    2.69
   4   1   9   26.36    2.48
   4   1   9   34.45    3.49
  -4  -1  -9   27.42    2.64
   4   1   9   33.76    3.05
   4  -1   9   34.47    2.98
   4  -1   9   32.21    2.81
  -4   1  -9   32.23    2.97
   6   1  -4    0.05    1.02
   6   1  -4    0.21    1.58
   6  -1  -4    0.83    1.15
   6  -1  -4    0.88    1.38
   6  -1  -4    0.94    1.67
   6  -1  -4    1.32    1.50
   6   1  -4    0.48    1.13
   0  -3   9   13.83    1.43
   0   3   9    8.33    2.31
   0   3  -9   11.84    1.58
   0  -3  -9   15.86    1.73
   0   3  -9   17.70    2.23
   0  -3   9   16.65    1.87
   0   0 -12   35.30    3.18
   0   0 -12   26.84    2.82
   0   0 -12   36.46    3.44
   0   0  12   36.98    3.17
   0   0  12   36.90    3.13
   4   2  -8    7.53    1.20
   4  -2  -8    8.16    1.53
  -4   2   8    7.71    1.34
   4   2  -8    7.06    1.84
  -4  -2   8    6.07    1.01
   4  -2  -8    3.40    1.65
   4   2  -8    9.98    1.64
   6   1   4    9.52    1.69
   6   1   4    9.87    1.31
   6  -1   4    9.72    1.27
   6  -1   4   10.05    1.50
   6  -1   4    8.71    1.05
  -6  -1  -4    9.91    1.43
   6   1   4    7.73    1.90
  -6  -1  -4    9.90    1.75
   6   0  -5   -0.08    0.93
   6   0  -5    0.04    1.07
   3  -4  -2   22.05    2.18
   3  -4  -2   19.97    2.25
  -3   4   2   22.28    2.21
  -3  -4   2   28.53    2.53
   3  -4  -2   23.62    2.31
  -3  -4   2   26.59    2.52
   3  -4  -2   19.89    2.25
   3   4  -2   15.20    1.98
  -3   4   2   23.25    2.48
  -3  -4   2   22.25    2.35
  -3   4   2   20.00    2.70
   3   4  -2   30.22    3.22
  -3   4  -2   31.98    3.07
  -3  -4  -2   19.26    1.99
   3  -4   2   23.27    2.35
   3  -4   2   26.41    2.37
  -3  -4  -2   22.95    2.33
   3   4   2   12.82    2.19
   3  -4   2   21.72    2.19
  -3   4  -2   27.64    2.55
   5   0  -8    4.71    1.39
   5   0  -8    7.70    1.29
   5   0  -8    5.99    1.51
   5   0  -8   14.42    1.77
  -5  -3   0    1.42    0.83
   5  -3   0    1.96    1.00
   5  -3   0    2.25    1.16
   5   3   0   -0.17    1.59
  -5   3   0    1.11    0.73
   5   3   0    0.90    1.80
  -5  -3   0    1.48    0.91
   5   3   0    1.59    0.78
  -5   3   0    1.63    0.70
  -4   2  -8   22.77    2.41
   4   2   8   21.76    2.79
  -4   2  -8   21.19    2.18
  -4  -2  -8   20.03    2.24
  -4  -2  -8   20.86    2.08
   4   2   8   12.74    1.64
  -4   2  -8   20.73    1.98
   1  -3  -9    5.87    1.14
   1   3  -9    7.42    1.70
   1   3  -9    6.52    1.46
  -1  -3   9    8.26    1.42
  -1   3   9    3.55    1.22
   1   3  -9    5.76    0.86
  -1  -3   9    6.08    1.04
  -1   3   9    6.58    2.05
   5  -2  -6    5.02    1.58
   5   2  -6    3.71    1.71
  -5  -2   6    6.33    1.13
  -5   2   6    4.95    1.12
   5  -2  -6    5.57    1.33
   5   2  -6    5.82    1.50
   5   2  -6    5.33    1.07
  -1   0  12   -0.10    0.72
   1   0 -12   -1.40    1.43
  -1   0  12   -0.17    0.78
   1   0 -12   -0.31    1.15
   6   0   5    9.46    1.52
   6   0   5    9.36    1.67
  -6   0  -5    8.41    1.23
  -6   0  -5    9.16    1.63
  -6   0  -5   10.66    2.10
   1   3   9    4.59    1.89
  -1  -3  -9    7.60    1.25
  -1   3  -9    6.61    1.62
   1   3   9    5.47    1.40
   5   3  -1   33.19    3.66
   5  -3  -1   36.51    3.29
  -5  -3   1   30.26    2.68
   5   3  -1   35.59    3.18
   5   3  -1   39.86    3.91
  -5   3   1   30.94    2.89
  -5   3   1   36.49    3.16
   5  -3  -1   33.29    3.27
   0  -4  -6   17.85    1.99
   0   4   6   17.78    2.05
   0   4  -6   12.40    1.67
   0   4   6   14.70    2.69
   0   4  -6   19.61    2.31
   0  -4   6   19.16    2.09
   0  -4   6   15.63    1.60
  -1   0 -12    1.78    1.24
   1   0  12    1.15    0.78
   1   0  12    1.40    0.70
  -1   0 -12    1.73    0.92
  -1   0 -12    1.88    1.37
  -5   3  -1    6.10    0.97
   5   3   1    5.21    1.58
   5  -3   1    7.34    1.39
   5  -3   1    6.80    1.02
  -5  -3  -1    8.41    1.38
   5   3   1    7.76    2.21
   6  -2   0    8.55    1.54
  -6  -2   0    5.16    1.20
   6   2   0    9.73    1.27
  -6   2   0    7.80    1.53
   6  -2   0    7.57    1.18
   6   2   0   12.46    2.15
  -6  -2   0    6.62    1.21
   6  -2   0    9.90    1.34
   0   2  11  147.44   12.35
   0  -2  11  143.01   11.62
   0   2 -11  132.87   10.92
   0   2  11  145.59   12.33
   0  -2  11  121.60    9.67
   0   2 -11  136.24   11.36
   0  -2 -11  107.28    8.57
   5   2   6   21.65    2.72
   5   2   6   12.77    1.89
   5  -2   6   23.58    2.23
   5  -2   6   22.53    2.07
  -5  -2  -6   16.77    1.78
  -5   0  -8   -0.61    1.37
  -5   0  -8    0.37    0.87
  -5   0  -8   -0.11    1.14
   5   0   8   -1.05    1.50
   5   0   8    0.29    0.91
   6  -2  -1   68.47    5.62
   6   2  -1   61.54    5.57
   6  -2  -1   59.95    5.18
   6  -2  -1   50.46    4.51
  -6   2   1   56.22    5.04
   6   2  -1   67.31    5.81
   6   2  -1   64.02    5.34
  -6  -2   1   65.29    5.60
  -6  -2   1   46.64    4.21
  -2  -4   5    0.05    1.15
   2  -4  -5   -0.38    1.08
  -2   4   5   -0.84    1.78
   2   4  -5    0.42    1.31
   2  -4  -5    0.65    0.95
   2   4  -5   -0.34    1.55
   2  -4  -5    0.79    1.07
  -2  -4   5   -0.48    0.82
  -6  -2  -1    5.66    1.37
   6  -2   1   11.04    1.66
   6  -2   1   10.88    1.43
   6   2   1    5.79    0.97
   6   2   1    9.41    1.82
  -6  -2  -1    6.82    1.28
   6  -2   1   10.30    1.33
   3   0 -11    8.79    1.80
  -3   0  11    7.63    1.18
   3   0 -11   10.10    1.57
   2   4   5   29.28    3.57
   2  -4   5   25.77    2.28
  -2  -4  -5   30.14    2.83
   2   4   5   21.17    3.04
  -2   4  -5   25.82    2.50
   2  -4   5   29.86    2.93
  -2  -4  -5   25.86    2.54
  -5   3   2   43.67    3.89
   5  -3  -2   41.39    3.83
  -5  -3   2   58.25    4.78
   5   3  -2   49.48    4.76
   5   3  -2   45.45    4.02
   5   3  -2   53.46    4.83
   5  -3  -2   47.21    4.20
   3   4  -3    0.97    1.44
  -3  -4   3    0.45    0.97
   3  -4  -3   -0.04    1.03
   3   4  -3    1.02    1.68
   3  -4  -3    0.56    0.86
  -3   4   3    0.67    1.76
  -3   4   3    0.61    1.01
  -3  -4   3    0.66    0.67
   3  -4  -3    0.61    0.97
  -3  -4   3    0.36    0.75
   3  -4  -3    0.14    0.93
   1   4  -6    1.36    1.50
   1  -4  -6    1.84    1.00
   1   4  -6    1.51    1.28
  -1   4   6    0.96    1.95
  -1  -4   6    1.08    0.70
  -1  -4   6    1.70    1.15
   0   1 -12    3.28    1.14
   0   1  12    2.27    1.47
   0   1 -12    1.80    0.77
   0  -1 -12    4.08    1.51
   0  -1  12    2.66    0.74
   0  -1 -12    2.24    1.34
   0   1  12    2.56    1.11
   0  -1  12    2.88    0.73
   0   1 -12    3.08    1.44
   0  -1  12    3.13    0.98
   5   3   2   26.04    3.21
   5  -3   2   24.36    2.46
   5   3   2   20.01    2.60
  -5  -3  -2   15.97    1.74
  -5  -3  -2   23.76    2.49
   5  -3   2   26.11    2.38
   3   4   3   13.54    2.05
   3  -4   3   12.40    1.57
  -3  -4  -3    9.67    1.25
  -3   4  -3   15.05    1.85
   3   4   3   10.94    2.32
   3  -4   3   12.69    1.36
  -3  -4  -3   11.77    1.60
  -1  -4  -6    1.25    0.98
  -1   4  -6    2.21    1.32
   1   4   6    2.26    1.28
   1   4   6   -0.63    2.19
   1  -4   6    2.84    0.73
  -1  -4  -6    2.56    0.93
   4  -3  -6    3.02    1.28
  -4  -3   6    1.36    0.93
   4  -3  -6    2.37    1.08
   4   3  -6    1.54    1.49
   4   3  -6    1.90    0.73
  -4   3   6    3.78    1.06
  -4  -3   6    1.99    0.84
   4   3  -6    0.97    1.30
   4  -3  -6    1.41    1.35
   1  -2 -11    2.89    1.38
   1   2 -11    2.84    1.03
   1  -2 -11    3.91    1.63
  -1  -2  11    3.57    0.94
  -1   2  11    4.15    1.71
   1   2 -11    2.69    0.76
   1   2 -11    4.19    1.51
   6  -1  -5   22.02    2.16
   6   1  -5   39.63    3.46
   6  -1  -5   35.38    3.70
   6  -1  -5   32.25    2.98
   6   1  -5   29.27    2.88
   6  -1  -5   28.01    3.09
   6   1  -5   34.37    3.75
   4   0 -10    0.14    1.24
   4   0 -10    0.23    1.17
   4   0 -10   -0.46    1.57
  -3   0 -11   -0.04    0.96
   3   0  11   -0.02    0.79
   3   0  11    1.44    1.55
   3   0  11    0.33    0.75
  -3   0 -11    0.17    1.21
  -3   0 -11    0.19    0.72
   6   2  -2   73.39    6.12
   6   2  -2   69.03    6.00
  -6   2   2   69.84    6.13
  -6  -2   2   75.02    6.36
   6  -2  -2   64.35    5.80
   6  -2  -2   71.33    6.35
  -6  -2   2   68.06    5.70
   6  -2  -2   79.10    6.45
  -1  -2 -11   20.77    2.36
   1   2  11   18.83    2.63
   1  -2  11   21.88    2.17
  -1  -2 -11   19.02    1.93
  -1   2 -11   19.46    1.99
   6  -2   2   44.71    3.94
  -6  -2  -2   46.75    4.04
   6   2   2   40.37    3.62
   6  -2   2   34.54    2.96
   6   2   2   38.00    3.94
   6  -2   2   38.52    3.36
   6   2   2   45.06    4.31
  -4  -3  -6    0.64    1.03
   4  -3   6    1.66    0.64
  -4  -3  -6   -0.05    1.02
  -4   3  -6    1.15    1.08
   5  -1  -8   10.45    1.58
   5   1  -8    7.61    1.17
   5   1  -8    5.35    1.58
   5  -1  -8    5.44    1.70
   5   1  -8    7.45    1.36
   1   1 -12   16.58    2.19
  -1  -1  12   18.58    1.81
   1   1 -12   16.74    1.89
  -1   1  12   15.94    1.91
   1   1 -12   12.15    1.43
   1  -1 -12   16.40    2.31
   1  -1 -12   16.73    1.93
  -1  -1  12   17.81    1.88
   6   1   5   10.28    1.35
   6   1   5    9.12    1.67
  -6   1  -5    7.70    1.22
   6   1   5   10.87    2.04
   6  -1   5    8.25    1.13
  -6  -1  -5    9.50    1.41
  -6  -1  -5    9.33    1.84
   6  -1   5   10.72    1.53
   1  -1  12    4.20    0.85
   1   1  12    4.84    1.50
  -1   1 -12    3.05    1.14
   1   1  12    3.11    1.14
   1  -1  12    3.81    0.79
   1   1  12    3.22    0.88
  -1   1 -12    5.34    1.42
   1  -1  12    4.38    1.09
  -1  -1 -12    4.50    1.49
  -4   0 -10   13.50    1.48
   4   0  10   10.31    1.35
   4   0  10   13.65    1.54
  -4   0 -10   14.00    1.94
   4   0  10   14.24    2.06
  -5  -3   3    2.02    1.21
   5  -3  -3   -0.32    1.28
  -5  -3   3    0.92    0.81
   5   3  -3    1.14    1.55
   5  -3  -3    1.45    0.97
  -5   3   3    0.72    0.85
   5   3  -3    1.30    0.78
   5   3  -3    1.01    1.69
   6   0  -6   19.36    2.15
   6   0  -6   13.21    1.60
  -3   3   8   13.29    2.27
  -3  -3   8   25.63    2.52
  -3   3   8   13.75    2.55
   3  -3  -8   17.35    2.38
  -3  -3   8   24.20    2.27
   3   3  -8   23.36    2.80
   3  -3  -8   22.80    2.90
   5   3   3    2.02    1.37
  -5  -3  -3    1.90    1.09
   5   3   3    4.37    2.21
  -5  -3  -3    2.13    0.92
   5  -3   3    3.33    1.05
   5  -3   3    2.36    0.85
  -5  -1  -8   51.61    4.51
   5   1   8   41.42    3.73
   5  -1   8   60.39    5.17
   5   1   8   55.77    5.18
  -5   1  -8   59.10    5.38
  -5  -1  -8   59.60    5.27
   2   3  -9    2.23    0.72
  -2  -3   9    1.12    0.81
   2   3  -9    2.18    1.45
  -2   3   9    0.55    1.77
  -2  -3   9    1.58    1.07
   2   3  -9    0.57    1.26
  -2   3   9    1.38    1.04
   2   0 -12    1.22    1.28
   2   0 -12   -0.12    1.00
  -2   0  12    0.12    0.85
   3   1 -11    4.69    1.21
  -3  -1  11    3.71    0.98
   3  -1 -11    5.05    1.45
   3   1 -11    4.81    1.70
   3  -1 -11    2.52    1.35
  -3   2  10    0.95    0.86
   3  -2 -10    0.85    1.30
   3   2 -10    0.39    1.32
  -3  -2  10    0.48    0.79
   3   2 -10    1.13    0.95
   3  -2 -10    1.19    1.71
  -3   2  10    1.15    1.39
   3  -2 -10    0.57    1.74
   3   2 -10    0.65    1.10
   6   2  -3   32.27    3.41
   6  -2  -3   29.04    3.18
   6   2  -3   26.57    2.65
   6   2  -3   24.90    2.79
  -6  -2   3   33.72    3.25
  -6  -2   3   19.37    2.34
   3  -4  -4    2.98    1.00
   3   4  -4    2.35    1.26
   3  -4  -4    3.06    1.39
   3   4  -4    4.56    1.82
  -3   4   4    4.71    1.16
  -3  -4   4    4.96    1.09
   3  -4  -4    3.49    0.99
  -3  -4   4    4.54    0.96
  -3   4   4    1.94    1.63
  -2  -3  -9    9.68    1.30
   2   3   9   16.41    2.82
  -2  -3  -9   14.51    1.96
  -3   3  -8    4.34    1.02
  -3  -3  -8    4.43    1.14
   3   3   8    6.00    2.13
  -3  -3  -8    4.16    1.42
  -6   0  -6   18.37    2.20
   6   0   6   18.89    2.07
   6   0   6   20.18    2.45
  -6   0  -6   18.84    1.98
   3  -4   4    3.87    1.19
  -3  -4  -4    3.90    1.16
  -3   4  -4    4.02    1.18
   3   4   4    3.75    2.41
   3  -4   4    3.50    1.27
   3  -4   4    3.41    0.75
  -3  -4  -4    2.96    1.00
   3   4   4    4.71    1.54
  -2   0 -12    1.59    1.22
  -2   0 -12    1.94    0.95
   2   0  12    2.10    0.84
   2   0  12    1.66    0.69
   6   2   3   38.62    3.50
   6  -2   3   30.94    2.78
   6   2   3   37.54    3.79
   6  -2   3   37.32    3.48
   6   2   3   35.37    3.75
  -6  -2  -3   27.72    2.89
   6  -2   3   36.67    3.34
  -3  -2 -10   30.69    2.85
  -3   2 -10   51.75    4.53
   3   2  10   54.98    4.85
  -3  -2 -10   40.57    3.73
   4   1 -10    1.92    1.45
  -4   1  10    3.36    1.06
   4   1 -10    3.71    1.32
   4  -1 -10    1.87    1.54
   4  -1 -10    2.16    1.47
   4   1 -10    3.50    1.16
   4  -1 -10    2.51    1.08
   3   1  11   11.09    1.39
   3   1  11    8.91    1.23
   3  -1  11   13.01    1.41
  -3  -1 -11   12.81    1.47
  -3   1 -11   12.20    1.68
  -3  -1 -11   12.96    1.88
   5  -2  -7   13.07    1.80
  -5  -2   7   13.63    1.56
   5  -2  -7   14.89    2.33
   5  -2  -7   10.38    1.95
   5   2  -7   14.73    2.01
   5   2  -7   14.00    1.62
   5   2  -7   12.40    2.18
  -5   2   7    8.38    1.18
   0   4   7    7.04    1.27
   0  -4  -7    9.74    1.40
   0  -4   7   13.65    1.49
   0   4   7   12.09    2.59
   0   4  -7   11.95    1.72
   0  -4   7   14.11    1.74
   0  -4  -7   13.24    1.82
   2  -4  -6    1.14    0.99
   2  -4  -6    0.68    1.18
  -2  -4   6    0.15    1.05
  -2   4   6    0.38    1.05
   2   4  -6    0.92    1.51
  -2   4   6    1.23    1.82
  -2  -4   6    0.34    0.83
   2  -4  -6    0.40    0.80
   2   4  -6    0.34    1.27
   4  -2  -9   29.93    3.76
   4   2  -9   29.65    2.95
  -4  -2   9   41.51    3.63
   4   2  -9   45.88    4.04
   4   2  -9   45.32    4.67
   4  -2  -9   52.02    4.65
   2   4   6   41.96    4.07
  -2  -4  -6   40.80    3.70
  -2  -4  -6   36.64    3.45
  -2   4  -6   40.27    3.73
  -2  -2  11   41.30    3.64
   2  -2 -11   51.24    4.75
   2  -2 -11   33.83    3.20
  -2   2  11   29.57    4.95
   2   2 -11   39.48    3.87
   2   2 -11   44.50    3.94
  -2  -2  11   30.16    2.93
  -5  -3   4    0.30    1.16
   5  -3  -4   -0.54    0.95
   5   3  -4    0.23    1.65
  -5   3   4    0.28    0.84
   5   3  -4    0.06    0.71
   5  -3  -4    0.74    1.38
   5  -3  -4   -0.05    1.12
   5   3  -4   -0.61    1.49
  -5  -3   4    0.21    0.77
   5  -2   7   46.13    4.02
   5   2   7   41.92    4.37
  -5  -2  -7   42.94    3.84
   5  -2   7   43.37    3.74
   5   2   7   41.43    3.88
  -4   1 -10   20.61    2.34
   4   1  10   19.24    2.05
   4  -1  10   19.65    1.91
   4   1  10   19.38    2.61
  -4  -1 -10   18.98    2.25
   4   1  10   17.79    1.89
  -4  -1 -10   18.19    1.85
   6   1  -6   19.66    2.70
   6  -1  -6   11.62    1.83
   6   1  -6   15.53    1.98
   6  -1  -6   16.57    1.86
   6   1  -6   20.36    2.16
   6  -1  -6   22.34    2.35
   0  -3  10   90.82    7.51
   0   3 -10   93.45    8.00
   0   3  10  112.23   12.77
   0  -3 -10   95.82    8.10
   2   2  11   12.19    2.12
   2   2  11   13.35    1.68
  -2  -2 -11   12.45    1.53
  -2   2 -11   12.47    1.57
  -2  -2 -11   12.88    1.93
  -5  -3  -4   41.38    3.77
   5  -3   4   39.68    3.62
   5   3   4   34.89    3.77
  -5  -3  -4   36.64    3.54
   5  -3   4   34.90    3.11
   5  -3   4   35.62    3.17
   5   0  -9   23.27    2.52
   5   0  -9   26.98    3.20
   5   0  -9   26.26    2.62
   2  -1 -12   16.17    2.37
  -2   1  12   26.61    2.56
   2   1 -12   23.20    2.39
  -2  -1  12   22.55    2.23
   2   1 -12   23.41    2.68
   2  -1 -12   24.66    2.57
   1   4  -7    9.96    1.82
  -1  -4   7    6.13    1.27
   1  -4  -7    5.20    1.18
   1   4  -7    6.36    1.52
  -1   4   7    6.13    2.13
  -1  -4   7    6.17    0.97
  -4  -2  -9   13.43    1.80
   4   2   9   10.79    1.52
  -4   2  -9   15.18    1.62
  -4  -2  -9   16.52    1.82
   4   2   9   17.62    2.62
  -4   2  -9   16.55    1.94
   6   2  -4    7.31    1.18
   6  -2  -4    7.43    1.79
   6   2  -4    3.68    1.47
   6   2  -4    8.09    1.77
  -1  -4  -7    5.36    1.19
   1  -4   7    5.66    0.88
  -1  -4  -7    3.47    1.20
  -1   4  -7    5.37    1.47
   1   4   7    5.23    2.37
   1   4   7    6.08    1.43
   1  -4   7    6.35    1.20
   4  -3  -7    5.50    1.84
  -4  -3   7    2.56    0.99
  -4   3   7    3.65    1.16
   4   3  -7    3.60    1.65
  -4  -3   7    4.15    0.89
   4  -3  -7    3.83    1.21
   4  -3  -7    4.08    1.41
   4   3  -7    5.06    1.40
   7   0   0    5.93    1.63
   7   0   0    6.28    1.21
   7   0   0    4.49    1.50
  -6   1  -6   20.61    2.08
  -6  -1  -6   15.18    1.67
   6   1   6   21.59    2.39
   6   1   6   22.66    2.78
   6   1   6   23.09    2.25
   6  -1   6   21.77    2.28
   6  -1   6   22.14    2.15
  -2   1 -12    9.27    1.51
   2  -1  12    8.86    1.10
   2   1  12    6.22    1.11
  -2  -1 -12    8.11    1.15
   2   1  12    8.41    1.15
   2   1  12   10.59    2.03
  -2  -1 -12    9.16    1.48
  -2   1 -12    8.36    1.52
  -4  -4   0    0.61    0.68
  -4   4   0    0.02    0.87
   4  -4   0    0.98    0.97
   4   4   0    0.88    1.49
   4  -4   0    0.34    0.82
  -4  -4   0    1.06    0.89
   4  -4   0    0.68    0.84
  -4  -4   0    1.27    1.09
  -4   4   0    0.02    0.74
   7   0  -1    0.47    0.88
   7   0  -1   -0.78    1.41
   7   0  -1    0.37    1.33
   6  -2   4    0.88    0.84
   6  -2   4    0.85    1.01
   6   2   4   -0.01    1.47
   6   2   4    1.14    1.83
  -6  -2  -4    0.32    0.90
   6   2   4    1.13    0.90
  -1  -3  10   19.57    2.10
   1  -3 -10   21.54    2.15
   1   3 -10   21.46    2.41
   1   3 -10   23.60    2.67
  -1   3  10   17.91    2.82
  -1   3  10   20.41    2.48
  -1  -3  10   19.71    1.96
   7   0   1   -0.04    0.93
   7   0   1   -0.25    1.46
   7   0   1   -1.18    1.09
  -4  -4   1    0.08    0.85
  -4  -4   1    0.47    0.84
   4  -4  -1    0.37    0.88
   4   4  -1   -0.60    1.23
   4  -4  -1    0.76    1.20
  -4   4   1    0.79    0.84
   4  -4  -1    0.02    0.87
  -4  -4   1    0.85    0.68
  -3  -4   5   15.96    1.65
  -3  -4   5   14.62    1.62
   3  -4  -5    8.63    1.61
   3   4  -5   11.52    2.04
  -3   4   5   13.63    2.45
   3   4  -5   11.92    1.87
   3  -4  -5   11.02    1.50
  -3  -4   5   16.25    1.81
  -3   4   5   14.58    1.87
   3  -4  -5   16.91    1.95
  -4  -4  -1    0.69    0.80
   4  -4   1    0.15    0.78
  -4  -4  -1    1.06    0.95
   4  -4   1    0.81    1.02
   4   4   1   -0.09    1.36
   4  -4   1    0.74    0.88
   1   3  10    5.40    2.27
  -1  -3 -10    5.27    1.15
  -4   3  -7    5.12    1.26
  -4  -3  -7    4.54    1.08
  -4  -3  -7    6.10    1.47
   4  -3   7    5.42    0.83
   5   0   9   27.36    2.64
   5   0   9   28.48    3.03
  -5   0  -9   26.77    2.51
  -5   0  -9   23.28    2.48
   3   4   5    1.16    2.04
  -3  -4  -5    0.93    1.08
  -3   4  -5    0.12    0.96
   3  -4   5    0.56    0.58
  -3  -4  -5   -0.33    1.09
   3   4   5    0.75    1.45
   7   0  -2    6.78    1.32
   7   0  -2    6.38    1.67
   7   0  -2    5.29    1.39
   6   0  -7   25.98    3.20
   6   0  -7   31.34    3.00
   6   0  -7   29.09    2.88
   0   0  13   42.92    3.73
   0   0  13   48.34    4.13
   0   0 -13   64.67    5.58
   0   0 -13   65.00    5.86
   4   4  -2    9.80    1.89
  -4  -4   2    8.18    1.26
   4  -4  -2    8.16    1.27
   4  -4  -2    7.71    1.50
   4  -4  -2    6.68    1.23
  -4  -4   2    8.55    1.16
   4  -4  -2    5.76    1.06
  -4  -4   2    7.15    1.22
  -4   4   2    6.53    1.12
   7   0   2    0.75    0.78
   7   0   2   -0.29    1.06
   7   0   2    0.07    1.39
   4  -4   2   21.47    2.31
   4   4   2   20.65    2.71
  -4  -4  -2   19.57    2.11
  -4  -4  -2   15.58    1.65
   4  -4   2   23.08    2.22
   5  -1  -9    2.42    1.39
   5  -1  -9    5.17    1.36
   5  -1  -9    2.14    1.41
   5   1  -9    4.51    1.81
   5   1  -9    4.62    1.25
   5   1  -9    4.28    1.16
   5  -3  -5   10.79    1.96
  -5   3   5   10.75    1.49
  -5  -3   5   13.31    1.54
   5   3  -5   11.68    2.04
   5   3  -5   12.30    1.42
   5  -3  -5    9.43    1.48
   5  -3  -5    9.19    1.27
  -5  -3   5    7.55    1.38
   5   3  -5   12.16    2.07
   6   0   7    0.30    0.88
  -6   0  -7    1.23    0.95
   6   0   7    0.72    1.46
   6   0   7   -0.68    0.89
   7   1   0   13.83    2.07
   7   1   0    8.14    1.15
   7  -1   0   13.54    1.94
  -7  -1   0   12.72    1.76
   7   1   0   12.63    1.88
   0   2  12    6.01    1.34
   0  -2  12    7.70    1.24
   0   2  12    7.28    1.99
   0  -2  12    8.46    1.03
   0  -2 -12    7.86    1.67
   1   0 -13    7.60    1.77
  -1   0  13    6.98    1.10
  -1   0  13    8.29    1.24
   1   0 -13    9.61    1.58
   7   1  -1    1.21    0.81
   7   1  -1    2.08    1.56
   7   1  -1    1.90    1.47
   7  -1  -1    1.70    1.38
   7  -1  -1    2.41    0.97
  -5  -3  -5   23.73    3.15
  -5  -3  -5   25.01    3.12
   5   3   5   28.79    4.15
   5  -3   5   26.74    3.15
   6   2  -5    5.77    1.51
   6   2  -5    6.09    1.81
   6  -2  -5    5.14    1.55
   6   2  -5    3.78    1.01
  -1   0 -13    8.83    1.71
   1   0  13    5.85    1.01
  -1   0 -13    6.78    1.69
   1   0  13    5.99    1.13
   7   1   1    3.09    1.55
   7   1   1    4.09    1.05
   7   1   1    1.82    1.35
   7  -1   1    2.23    0.74
   7  -1   1    3.20    1.34
  -7  -1  -1    2.55    1.22
   7   0  -3    0.99    1.58
   7   0  -3   -0.30    1.11
   7   0  -3   -0.97    1.06
   3   0 -12   26.95    3.38
   3   0 -12   25.18    3.40
  -3   0  12   12.85    1.73
   3   3  -9    1.78    1.54
   3  -3  -9    2.09    1.30
  -3  -3   9    2.92    0.76
   3  -3  -9    3.34    1.86
  -3   3   9    1.58    0.94
  -3   3   9    0.77    1.52
  -3  -3   9    3.67    1.12
   4   0 -11    7.17    1.67
   4   0 -11   12.73    1.89
   5   1   9   74.95    8.57
   5  -1   9   84.01    9.52
  -5   1  -9   77.36    8.88
  -5  -1  -9   64.30    7.36
   5   1   9   77.33    9.04
  -5  -1  -9   76.30    8.70
  -2   4   7   32.86    4.77
   2   4  -7   66.73    7.72
  -2  -4   7   56.86    6.59
   2  -4  -7   48.44    5.79
   2   4  -7   61.07    7.24
  -2  -4   7   46.60    5.38
  -2   4   7   59.13    7.17
   4   4  -3   11.98    2.29
   4  -4  -3   13.24    1.92
  -4  -4   3    9.96    1.62
   4  -4  -3    9.75    1.53
  -4  -4   3   14.71    2.04
  -4   4   3   10.95    1.72
   4  -4  -3   12.43    2.10
  -4  -4   3   15.00    1.96
   0  -5   0   -0.14    0.95
   0   5   0    1.01    1.89
   0   5   0   -1.41    1.04
   0  -5   0   -0.04    0.74
  -7   0  -3   13.86    2.03
   7   0   3   16.51    2.53
   7   0   3   10.77    1.54
   7   0   3   16.55    2.41
   2   4   7   16.30    2.60
  -2   4  -7   17.52    2.38
  -2  -4  -7   11.52    1.86
   2   4   7   19.66    3.36
  -2  -4  -7   19.16    2.65
  -5   2   8    4.04    1.07
   5   2  -8    3.70    1.39
   5   2  -8    3.56    1.03
  -5  -2   8    2.32    0.92
   5   2  -8    2.95    1.41
   5  -2  -8    2.67    1.53
   5  -2  -8    4.72    1.45
   5  -2  -8    2.49    1.65
  -4  -4  -3   24.79    3.15
   4  -4   3   21.48    2.77
  -4  -4  -3   23.37    2.99
   4  -4   3   22.37    2.79
   4   4   3   20.24    3.11
   4  -4   3   20.15    2.46
  -1  -2  12   33.92    3.99
   1   2 -12   37.61    4.67
  -1   2  12   39.46    4.72
   1  -2 -12   31.34    3.84
  -1   2  12   17.06    3.38
   1  -2 -12   19.20    2.68
  -6  -2  -5   30.47    3.67
  -6  -2  -5   24.59    3.17
   6  -2   5   27.56    3.36
   6  -2   5   30.38    3.56
   6   2   5   29.09    4.02
   6   2   5   28.75    3.69
  -3  -3  -9    0.90    1.13
   3   3   9    1.52    2.41
  -3  -3  -9    1.92    1.07
   7  -1  -2    4.28    1.57
   7   1  -2    4.31    1.67
   7   1  -2    4.69    1.16
   7  -1  -2    5.65    1.37
   7   1  -2    4.76    1.53
   0  -5   1   32.75    4.02
   0   5   1   29.84    4.21
   0  -5  -1   26.11    3.13
   0   5   1   29.17    3.84
   0  -5   1   27.86    3.29
   0   5  -1   20.85    2.97
   0   5  -1   34.45    4.31
   0  -5  -1   34.77    4.23
   0  -5   1   30.39    3.79
   6   1  -7   14.77    2.13
   6  -1  -7   18.00    2.87
   6  -1  -7   12.09    2.25
   6   1  -7   10.87    2.04
   6   1  -7   22.04    2.79
   6  -1  -7   16.11    2.18
   6  -1  -7   13.36    1.93
  -3   0 -12    1.83    1.29
   3   0  12    1.03    1.61
   3   0  12    3.07    0.87
   3   0  12    3.08    0.89
  -2   3  10   22.08    3.08
   2   3 -10   25.33    3.35
   2   3 -10   18.84    2.71
  -2  -3  10   21.61    2.71
  -2   3  10   14.56    2.86
  -2  -3  10   26.00    3.27
   0   4   8    3.03    1.84
   0   4   8    4.14    1.27
   0  -4  -8    7.62    1.46
   0  -4   8    6.43    1.06
   0   4  -8    6.26    1.73
   0  -4  -8    6.99    1.55
   0  -4   8    7.41    1.42
   1   2  12   16.39    2.37
  -1  -2 -12   11.54    1.63
   1  -2  12   18.29    2.26
  -1   2 -12   16.71    2.22
  -1  -2 -12   15.88    2.31
   1   2  12    8.50    2.19
   0   1 -13   16.25    2.23
   0   1  13   19.85    2.94
   0  -1 -13   15.69    2.23
   0  -1  13   15.72    2.00
   0   1 -13   13.45    2.12
   0  -1 -13   17.74    2.67
   0   1  13   17.73    2.39
   0  -1  13   17.84    2.21
   7  -1   2    7.14    1.52
   7   1   2    7.51    1.72
   7   1   2    5.07    1.03
  -7  -1  -2    5.44    1.24
   7   1   2    6.19    1.78
   7  -1   2    4.10    0.83
   4   0  11    5.63    1.09
   4   0  11    3.48    0.96
   4   0  11    5.45    1.71
  -4   0 -11    6.27    1.39
  -2  -3 -10   41.77    4.89
   2   3  10   49.72    6.24
   3   4  -6   13.22    2.38
  -3  -4   6   11.67    1.67
  -3  -4   6   11.17    1.51
   3  -4  -6    9.07    1.59
   3   4  -6    9.58    1.94
   3  -4  -6   12.28    1.96
   3  -4  -6    6.59    1.66
  -3   4   6    9.37    2.31
  -3   4   6    9.78    1.72
  -3  -4   6    7.40    1.22
   5   2   8    1.18    1.80
   5   2   8    2.79    1.37
   5  -2   8    2.09    0.78
   5  -2   8    1.69    0.80
  -5  -2  -8    2.02    1.06
  -1  -5   0   17.58    2.22
  -1  -5   0   14.71    2.02
  -1   5   0   18.35    3.03
   1   5   0   22.19    3.38
   1  -5   0   23.84    2.97
  -1  -5   0   19.81    2.46
  -1   5   0   16.03    2.19
   1   5   0   21.38    3.03
   1  -5   0   13.94    2.05
   1  -5   0   19.42    2.41
   3   2 -11    0.37    1.14
   3  -2 -11    1.37    1.52
   3   2 -11    0.41    1.62
  -3   2  11    0.80    1.07
  -3  -2  11    1.89    0.79
   3  -2 -11    0.78    1.14
   0  -5   2    0.41    0.71
   0  -5  -2    1.16    0.84
   0  -5   2    0.39    0.97
   0  -5   2    1.63    0.61
   0   5   2    0.23    1.13
   0   5  -2    0.68    0.99
   0   5  -2    1.29    1.43
   0  -5   2    1.02    0.67
   0  -5  -2    1.98    1.08
   0   5   2    0.23    2.05
   6   1   7    9.34    1.59
   6  -1   7   15.27    2.08
  -6  -1  -7   14.19    1.99
   6   1   7   14.95    2.58
   6  -1   7   11.83    1.62
  -6  -1  -7   13.23    2.04
  -3   4  -6    1.55    1.01
   3  -4   6    1.82    0.62
   3   4   6    2.78    1.50
  -3  -4  -6    0.98    1.19
  -3  -4  -6    1.56    1.09
   3   4   6    2.30    2.07
  -1   5   1   19.98    3.27
  -1  -5   1   19.28    2.37
   1  -5  -1   14.68    2.02
   1   5  -1   27.35    3.80
   1  -5  -1   17.47    2.21
  -1   5   1   16.72    2.43
   1   5  -1   17.98    2.60
  -1  -5   1   23.77    2.99
   1   4  -8    7.26    1.78
  -1   4   8    4.33    1.90
  -1  -4   8    7.80    1.49
   1  -4  -8    4.84    1.10
  -1  -4   8    7.96    1.26
   1  -4  -8    6.89    1.44
  -1  -5  -1    8.42    1.43
  -1   5  -1   13.75    2.50
   1   5   1   12.30    2.69
  -1   5  -1   10.34    1.62
   1   5   1   10.12    1.94
   1  -5   1    6.95    1.39
   1  -5   1   10.64    1.62
   1  -5   1    9.90    1.42
  -1  -5  -1   10.07    1.49
  -1  -5  -1    9.09    1.31
  -1   1  13    8.88    1.50
   1  -1 -13    7.83    1.54
  -1  -1  13    8.46    1.26
   1  -1 -13    4.65    1.51
   1   1 -13    4.60    1.40
   1   1 -13    6.79    1.42
  -1  -4  -8    7.24    1.42
   1   4   8    5.83    2.40
  -1   4  -8    5.29    1.35
  -1  -4  -8    4.74    1.26
   1   4   8    3.66    1.18
   1  -4   8    6.97    1.08
   1  -4   8    7.96    1.40
   4   3  -8   17.60    2.49
   4  -3  -8   13.91    2.46
   4   3  -8   19.98    3.07
  -4  -3   8   19.37    2.38
   4  -3  -8   23.36    3.37
  -4  -3   8   22.31    2.87
  -4   3   8   14.52    2.31
   7   0  -4   39.53    4.73
   7   0  -4   50.22    6.05
   7   0  -4   33.16    4.30
  -1   1 -13    9.69    1.62
   1   1  13    7.64    1.84
   1   1  13    9.70    1.63
   1  -1  13   10.82    1.48
  -1  -1 -13    8.41    1.75
   1  -1  13   12.03    1.60
  -1   1 -13    9.11    1.73
   7  -1  -3   19.56    2.62
   7   1  -3   20.42    2.89
   7  -1  -3   21.14    3.17
   7   1  -3   21.53    2.74
   3   1 -12   30.68    3.99
   3   1 -12   32.58    3.91
   3  -1 -12   27.47    3.41
   3  -1 -12   34.00    4.34
   4   1 -11    7.56    1.72
   4  -1 -11   13.70    2.52
   4   1 -11   15.51    2.18
   4  -1 -11   14.69    2.13
  -4   1  11   10.01    1.79
  -4  -2  10    7.77    1.26
   4   2 -10    3.63    1.51
   4  -2 -10    5.14    1.41
   4   2 -10    9.11    1.78
  -4   2  10    3.93    1.18
   4   2 -10    6.78    1.24
   4  -2 -10    5.48    1.98
  -3  -2 -11    9.51    1.89
  -3  -2 -11    9.54    1.52
  -3   2 -11    9.95    1.58
   3   2  11   10.06    1.68
  -4  -4   4    1.84    0.91
   4  -4  -4    0.04    1.07
  -4   4   4    1.72    0.99
   4   4  -4    1.68    1.55
  -4  -4   4    1.54    0.99
   4  -4  -4    1.47    0.79
  -4  -4   4    1.67    0.79
   4  -4  -4    1.99    1.15
   7   1   3    8.54    1.92
   7   1   3   11.63    1.69
   7  -1   3   12.51    1.77
   7  -1   3   11.36    1.86
   7  -1   3    8.88    1.28
   7   1   3   10.90    2.00
  -7  -1  -3    8.37    1.47
   2   0 -13   44.46    5.31
   2   0 -13   85.21    9.73
  -2   0  13   48.90    5.61
   7   0   4   51.79    6.12
  -7   0  -4   51.69    5.97
   7   0   4   46.58    5.55
   7   0   4   31.94    3.73
  -4  -3  -8    1.63    1.21
  -4  -3  -8    2.47    1.06
   4   3   8    0.55    1.16
   1   5  -2   12.78    2.17
  -1  -5   2   11.78    1.58
  -1   5   2   12.89    2.65
   1   5  -2   10.46    2.15
  -1  -5   2   11.72    1.55
   1  -5  -2    9.86    1.48
  -1   5   2   10.04    1.76
  -1  -5   2   10.04    1.47
   1  -5  -2   13.87    1.98
  -5   3   6   29.81    3.93
   5  -3  -6   18.70    3.22
   5   3  -6   18.83    2.78
   5   3  -6   21.94    2.98
   5  -3  -6   33.14    4.04
  -5  -3   6   32.03    3.75
  -5  -3   6   25.25    3.28
   1  -5   2   23.24    2.91
   1  -5   2   22.12    2.88
   1   5   2   13.18    2.16
  -1  -5  -2   22.97    2.84
   1  -5   2   23.96    2.86
  -1   5  -2   28.06    3.76
   1   5   2   16.77    2.99
  -1  -5  -2   25.25    3.21
   4   4   4   17.52    2.78
  -4  -4  -4   18.21    2.46
   4  -4   4   16.47    2.07
  -4  -4  -4   16.37    2.32
   5   0 -10    8.85    2.03
   5   0 -10   20.91    3.20
   5   0 -10   16.52    2.24
  -3  -1 -12    5.00    1.52
   3   1  12    2.95    0.87
  -3   1 -12    3.13    1.10
  -3  -1 -12    3.89    0.96
   3  -1  12    3.93    0.83
   3   1  12    3.56    1.08
   4   2  10   14.19    2.13
  -4  -2 -10   15.70    2.09
  -4  -2 -10   14.16    2.14
   4   2  10   16.85    2.95
  -4   2 -10   16.04    2.25
   4   1  11   18.85    2.50
  -4  -1 -11   21.00    2.77
   4   1  11   17.05    2.23
  -4  -1 -11   21.04    2.59
   4   1  11   25.22    3.49
   4  -1  11   23.17    2.76
  -4   1 -11   23.04    3.04
   6   0  -8    0.57    1.02
   6   0  -8   -0.27    1.16
   6   0  -8    0.67    1.36
   6   0  -8   -0.11    0.97
   0   5  -3   36.07    4.54
   0  -5   3   24.82    3.25
   0  -5  -3   26.08    3.35
   0   5   3   31.08    4.54
   0   5   3   17.48    2.57
   0  -5  -3   29.80    3.57
   0  -5   3   28.62    3.56
   2   0  13    6.21    1.12
  -2   0 -13    6.88    1.43
   2   0  13    6.22    1.10
   6  -2  -6    9.05    1.68
   6  -2  -6    3.77    1.45
   6   2  -6    4.24    1.27
   6   2  -6    5.34    1.06
   6   2  -6    8.99    2.10
  -6  -3   0    0.66    1.13
   6   3   0    3.21    1.96
   6   3   0    0.72    0.74
   6  -3   0    0.46    0.92
   6   3   0    0.61    1.63
   6  -3   0   -0.02    1.15
   0   3  11    7.86    2.14
   0  -3 -11   13.52    1.90
   0  -3  11   12.47    1.65
   0   3 -11   14.93    2.43
   5   3   6    1.51    1.92
   5  -3   6    4.51    0.91
  -5  -3  -6    1.76    0.98
  -5  -3  -6    3.31    1.40
   6   3  -1   67.36    7.73
  -6  -3   1   52.53    6.39
   6   3  -1   70.53    8.43
   6  -3  -1   72.42    8.36
   6  -3  -1   71.89    8.13
   6   3  -1   46.66    5.87
  -2   2  12    5.80    2.01
   2  -2 -12    9.58    1.86
   2   2 -12    9.12    2.00
   2  -2 -12    7.47    1.81
  -2  -2  12    9.61    1.44
   6   3   1   46.04    5.73
   6  -3   1   49.08    5.76
   6   3   1   50.24    6.04
   6  -3   1   33.39    3.90
   6   3   1   40.16    4.80
  -6  -3  -1   49.57    5.76
   5   0  10    1.54    1.51
  -5   0 -10    0.58    1.16
   5   0  10    1.54    0.85
   6   2   6    5.04    1.56
   6  -2   6    5.34    1.13
   6   2   6    3.73    2.03
  -6  -2  -6    4.64    1.24
   6  -2   6    4.43    0.98
   2   2  12    4.48    1.16
  -2  -2 -12    6.71    1.56
   2   2  12    8.17    2.23
  -2  -2 -12    5.79    1.19
  -2   2 -12    7.17    1.33
  -1  -5   3    1.09    1.13
   1  -5  -3    1.51    0.96
   1   5  -3    0.97    1.18
  -1   5   3    0.70    1.72
  -1   5   3    0.22    1.02
  -1  -5   3    1.71    0.86
   1   5  -3    1.47    1.73
   1  -5  -3    1.42    1.01
  -6   0  -8    1.28    1.28
   6   0   8    1.74    0.99
   6   0   8    0.69    1.47
  -6   0  -8    1.35    0.85
   7  -1  -4    3.67    1.32
   7  -1  -4    1.33    1.57
   7   1  -4    1.20    0.85
   7   1  -4    3.28    1.44
  -1   3  11   20.50    4.02
  -1   3  11   22.99    3.01
  -1  -3  11   40.86    4.87
   1   3 -11   42.00    5.10
  -1  -3  11   37.07    4.38
   1  -5   3   26.43    3.41
   1  -5   3   41.28    4.87
  -1  -5  -3   32.53    3.93
   1   5   3   36.79    4.75
  -1  -5  -3   35.86    4.43
  -1   5  -3   38.41    4.82
   1   5   3   19.22    3.10
   1  -5   3   31.80    3.74
   6   3  -2    2.51    1.49
   6  -3  -2    1.47    1.14
   6  -3  -2    0.64    1.17
   6   3  -2    0.81    1.39
   6   3  -2    0.46    0.84
   1   3  11   23.87    4.05
  -1  -3 -11   26.71    3.29
   2  -5   0    2.09    0.82
  -2   5   0    1.05    1.48
  -2  -5   0    1.84    0.80
   2   5   0    1.70    1.71
  -2  -5   0    1.49    0.63
  -2  -5   0    3.52    1.13
   2  -5   0    2.10    0.87
   2  -5   0    3.51    1.18
   2   5   0    1.81    1.39
   6  -3   2   48.48    6.29
  -6  -3  -2   34.51    4.20
   6  -3   2   44.67    5.22
  -6  -3  -2   52.43    6.83
   6   3   2   45.14    6.16
   6   3   2   45.12    6.27
   7   0  -5   14.30    2.11
   7   0  -5   11.81    2.33
   7   0  -5   17.06    2.41
  -2   4   8   11.32    2.66
  -2   4   8   10.04    1.94
   2   4  -8   17.94    2.63
   2   4  -8   16.51    2.48
  -2  -4   8   16.88    2.19
   2  -4  -8   18.65    2.60
  -2  -4   8   18.87    2.61
   2  -1 -13   28.94    3.62
   2  -1 -13   19.58    2.85
  -2   1  13   20.39    2.93
   2   1 -13   32.84    4.00
   2   1 -13   31.27    4.05
  -7  -1  -4   15.13    2.11
   7   1   4    9.22    1.46
   7   1   4   12.81    2.13
   7  -1   4   13.73    2.03
   7   1   4   11.87    2.16
   7  -1   4   11.77    1.67
  -7   1  -4   11.32    1.73
   7  -1   4   10.37    1.43
   2   5  -1    6.07    1.48
  -2  -5   1    8.68    1.32
   2   5  -1    8.77    2.12
   2  -5  -1    9.83    1.72
  -2   5   1    7.97    2.21
   2  -5  -1    8.03    1.27
   2  -5  -1    6.65    1.16
  -2  -5   1   10.46    1.67
   2  -5   1    4.77    1.18
  -2  -5  -1    9.34    1.47
   2   5   1    8.17    1.86
   2  -5   1    7.83    1.21
   2   5   1    9.01    2.29
  -2  -5  -1    7.23    1.17
  -2   5  -1    8.71    2.05
  -2  -5  -1    9.85    1.62
   2  -5   1    8.50    1.35
   5   1 -10    1.26    1.13
   5  -1 -10    1.39    1.06
   5  -1 -10    0.22    1.42
   5   1 -10    1.57    1.49
   5  -1 -10    2.48    1.53
   5   1 -10    1.59    1.07
  -2  -4  -8   -0.31    0.94
  -2   4  -8   -0.00    1.22
  -2  -4  -8    0.04    1.11
   2   4   8   -1.41    1.86
   2   4   8    0.09    1.16
  -4   4   5    3.28    1.04
   4  -4  -5    6.29    1.71
  -4  -4   5    6.25    1.20
  -4  -4   5    4.01    1.00
   4  -4  -5    4.80    1.07
   4   4  -5    5.43    1.74
   4  -4  -5    6.19    1.43
   3  -4  -7    0.10    1.25
  -3  -4   7    0.60    0.87
   3  -4  -7    0.70    1.15
  -3   4   7   -0.55    1.08
  -3   4   7   -0.70    1.73
   3  -4  -7   -0.25    1.21
   3   4  -7   -0.10    1.42
   6  -1  -8    1.29    1.26
   6  -1  -8    1.08    0.87
   6  -1  -8    0.61    1.46
   6   1  -8    0.47    0.92
   6   1  -8    0.37    1.08
   6   1  -8   -0.43    1.72
   2  -1  13   21.17    2.57
   2   1  13   22.97    2.91
  -2  -1 -13   20.41    2.55
   2   1  13   18.97    2.77
  -2   1 -13   20.32    2.70
  -2  -1 -13   20.52    2.75
   0  -5  -4   12.18    1.81
   0   5  -4   17.75    2.74
   0   5   4   12.73    2.83
   0  -5   4   16.74    2.20
   0   5   4   12.78    2.17
   0  -5  -4   16.62    2.31
   0  -5   4   10.51    1.74
   7   0   5   18.33    2.56
   7   0   5   21.86    3.08
  -7   0  -5   14.51    2.06
   4  -4   5   12.01    1.58
  -4  -4  -5   10.43    1.67
   4   4   5   13.23    2.32
  -4  -4  -5   10.61    1.81
   5   2  -9   10.61    1.83
   5  -2  -9    7.80    1.95
   5   2  -9   13.83    2.55
   5  -2  -9    9.72    1.77
  -5   2   9    6.64    1.57
   5  -2  -9   10.05    2.25
   5   2  -9   13.55    1.89
   3   4   7    5.19    1.48
  -3  -4  -7    5.28    1.33
   3   4   7    8.47    2.72
  -3   4  -7    8.09    1.50
  -3  -4  -7    7.28    1.43
   2  -5  -2    1.90    0.88
  -2  -5   2    2.49    0.75
  -2   5   2    2.25    1.86
  -2  -5   2    2.63    1.07
   2   5  -2    3.15    1.81
   2   5  -2    2.17    1.41
   2  -5  -2    1.60    0.77
   2  -5   2   10.11    1.45
  -2  -5  -2    7.31    1.14
   2  -5   2   10.35    1.49
  -2   5  -2    7.27    1.65
   2   5   2    9.64    2.62
  -2  -5  -2    9.93    1.53
   2   5   2   13.20    2.29
   2  -5   2    8.40    1.48
  -2  -5  -2    7.58    1.36
   3   3 -10    4.27    1.35
   3   3 -10    5.94    1.73
  -3  -3  10    4.87    1.14
  -3   3  10    3.81    1.34
  -3   3  10    1.33    1.51
   6   3  -3   12.35    2.34
   6   3  -3   10.84    1.58
   6  -3  -3   10.68    1.80
   6  -3  -3    7.83    1.74
   6   3  -3    6.71    1.75
  -7  -2   0    2.32    1.06
   7  -2   0    2.30    0.85
   7  -2   0    2.23    1.22
   7  -2   0    2.62    1.00
   7   2   0    2.82    0.99
   7   2   0    4.04    1.53
   0  -4   9    4.86    0.92
   0   4   9    1.83    1.80
   0  -4  -9    3.80    1.09
   0  -4  -9    3.38    1.22
   0   4  -9    5.52    1.70
   5   1  10   26.94    3.59
  -5  -1 -10   26.81    3.25
  -5   1 -10   25.17    3.24
   5  -1  10   29.86    3.56
   5   1  10   20.62    2.64
  -5  -1 -10   30.87    3.93
   5  -1  10   27.36    3.29
   7   2  -1    1.62    0.81
  -7  -2   1    2.21    1.30
   7  -2  -1    1.48    1.13
   7  -2  -1    1.93    1.34
   7   2  -1    2.58    1.49
  -6  -3  -3   11.79    1.77
   6  -3   3   15.27    2.01
   6  -3   3   17.90    2.41
   6   3   3   16.66    2.77
  -6  -3  -3   17.92    2.57
   1  -5  -4    1.30    0.90
  -1  -5   4    0.71    1.04
   1   5  -4    0.47    1.44
  -1   5   4    0.59    2.04
  -1   5   4    1.50    1.08
   1   5  -4    0.84    1.22
   1  -5  -4    1.62    0.87
  -1  -5   4    1.52    0.80
   6   1   8   16.36    2.71
  -6  -1  -8   17.40    2.35
   6   1   8   20.88    2.80
  -6  -1  -8   20.96    2.99
   6  -1   8   14.80    2.05
   6  -1   8   10.08    1.43
   7   2   1   14.34    1.98
   7   2   1   14.09    2.45
   7  -2   1   11.56    1.73
   7  -2   1   14.12    2.13
   7   2   1   13.72    2.46
   7  -2   1   15.09    2.03
  -7  -2  -1   17.20    2.39
   1   5   4   20.02    3.49
   1   5   4   25.81    3.55
  -1  -5  -4   20.49    2.67
  -1   5  -4   26.09    3.51
  -1  -5  -4   19.34    2.66
   1  -5   4   27.88    3.40
  -3  -3 -10    1.46    1.04
   3   3  10   -0.34    2.32
   3   3  10    0.06    1.03
  -5   2  -9   20.47    2.74
   5   2   9   24.58    3.20
  -5  -2  -9   21.30    2.73
  -5  -2  -9   18.64    2.60
   5   2   9   22.63    3.56
   5   3  -7    7.71    1.83
  -5   3   7    4.41    1.06
   5  -3  -7    9.14    2.06
  -5  -3   7    8.45    1.64
   5   3  -7    5.31    1.54
  -5  -3   7    8.74    1.39
   5  -3  -7    5.35    1.31
   7  -1  -5    9.13    2.06
   7   1  -5    8.17    1.62
   7   1  -5    6.57    1.29
   7  -1  -5    8.53    1.53
   5  -4   0    2.25    0.88
  -5  -4   0    1.97    1.07
   5   4   0    2.88    2.12
   5   4   0    3.72    1.71
   5  -4   0    1.74    0.94
   5  -4   0    1.35    1.00
  -1  -4   9   22.04    2.71
   1  -4  -9   18.70    2.48
   1  -4  -9   18.10    2.47
   1   4  -9   21.94    3.01
  -1  -4   9   25.69    3.27
  -1   4   9   11.96    2.63
   0   0 -14   11.04    2.10
   0   0  14   10.54    1.55
   0   0  14   10.25    1.46
   0   0 -14    8.85    1.57
   7   2  -2    2.66    1.46
   7  -2  -2    1.96    1.16
   7   2  -2    1.04    0.75
  -7  -2   2    2.79    1.12
   7  -2  -2    3.15    1.45
   4   0 -12    6.89    1.82
   4   0 -12    9.86    1.67
   1   4   9   13.09    2.14
  -1   4  -9   14.28    2.30
  -1  -4  -9   12.52    2.05
   1   4   9   12.23    2.81
  -1  -4  -9   13.32    1.99
   4   3  -9    5.27    1.47
  -4  -3   9    6.89    1.41
   4  -3  -9    3.52    1.61
   4   3  -9    6.35    1.82
   4  -3  -9    5.71    2.00
  -4   3   9    4.03    1.18
   5   4  -1    3.12    1.70
   5  -4  -1    1.68    0.91
   5  -4  -1    2.63    1.25
   5   4  -1    2.84    2.07
  -5  -4   1    2.52    1.04
  -5  -4   1    3.95    0.99
   5  -4  -1    1.54    0.84
  -5  -4   1    3.21    1.07
   6  -2  -7    4.90    1.11
   6   2  -7    5.18    1.21
   6  -2  -7    5.30    1.31
   6   2  -7    2.06    1.56
   6  -2  -7    3.58    1.51
   6   2  -7    6.79    1.61
   2   3 -11    1.06    1.33
  -2   3  11    0.93    1.75
  -2  -3  11    1.29    0.88
   2  -3 -11    3.36    1.67
  -2   3  11    1.67    1.06
   2  -3 -11    0.45    1.15
   2  -5  -3   12.02    1.75
   2   5  -3   10.96    2.14
  -2   5   3   11.14    2.30
  -2  -5   3   11.84    1.77
   2   5  -3   11.31    2.08
   2  -5  -3   13.98    1.96
   5  -4   1   22.64    2.95
   5   4   1   14.88    2.38
   5   4   1   16.71    2.90
  -5  -4  -1   20.07    2.63
   5  -4   1   19.61    2.45
   0  -2  13    4.19    1.02
   0  -2 -13    4.75    1.42
   0   2  13    5.96    1.95
   0   2  13    4.32    1.23
   5  -3   7    3.66    0.83
  -5  -3  -7    3.04    1.25
   5   3   7    1.91    1.29
   5   3   7    3.58    2.43
  -5  -3  -7    3.18    1.16
   2  -5   3    3.16    0.78
  -2  -5  -3    4.10    1.13
   2  -5   3    3.19    0.85
  -2  -5  -3    2.20    1.13
  -2   5  -3    2.29    1.27
   2   5   3    3.15    2.33
  -2  -5  -3    1.76    0.69
   2   5   3    0.70    1.18
   7   2   2   14.32    2.43
   7   2   2   15.07    2.05
   7   2   2   11.60    2.13
  -7  -2  -2    9.99    1.64
   7  -2   2   14.72    2.03
   7  -2   2   12.89    1.99
   7  -2   2   12.71    1.77
   7   1   5    4.48    1.31
   7  -1   5    9.00    1.44
   7   1   5    7.42    1.99
   7   1   5    8.39    1.41
  -7  -1  -5    7.35    1.41
   7  -1   5    6.19    1.01
   7  -1   5    8.81    1.55
   3   0 -13    4.41    1.56
  -3   0  13    2.99    0.92
   3   0 -13    5.51    1.47
  -2  -3 -11   15.82    2.18
   2   3  11   15.16    2.28
   2   3  11    9.04    2.39
  -4  -3  -9    0.54    1.23
  -4  -3  -9    1.20    0.88
   4   3   9    1.10    1.32
   6   3  -4    3.87    1.75
  -6  -3   4    3.12    1.30
  -6   3   4    2.80    0.91
   6  -3  -4    2.47    1.09
   6   3  -4    1.93    1.39
   6   3  -4    2.89    0.90
   6  -3  -4    3.45    1.46
   1   0 -14   22.84    2.99
  -1   0  14   22.50    2.79
   1   0 -14   23.10    3.22
   7   0  -6   12.14    1.93
   7   0  -6   13.78    2.46
   7   0  -6   14.47    2.12
  -5  -4   2   34.09    4.03
  -5  -4   2   27.44    3.42
   5  -4  -2   28.85    3.58
   5  -4  -2   23.24    3.08
   5   4  -2   17.74    2.72
  -5   4   2   26.84    3.41
  -5  -4   2   28.01    3.59
   5   4  -2   36.52    4.78
   5  -4  -2   26.46    3.57
  -6  -2  -7    5.11    1.26
   6   2   7    5.50    2.21
   6  -2   7    5.63    1.09
   6   2   7    6.43    1.62
   6  -2   7    5.64    0.98
   0  -5   5   15.97    2.08
   0   5   5   11.00    1.97
   0  -5  -5   13.51    2.04
   0   5   5   12.43    2.76
   0  -5  -5   17.62    2.40
   0   5  -5   17.42    2.62
   4   0  12    4.92    1.13
   4   0  12    5.04    1.59
  -4   0 -12    3.28    1.51
   4   0  12    4.74    1.13
  -1   2  13    4.71    1.84
   1  -2 -13    3.42    1.50
  -1  -2  13    3.55    0.94
   1  -2 -13    2.91    1.53
   1   2 -13    2.93    1.50
  -1   2  13    3.89    1.27
  -1   0 -14   -0.04    1.17
   1   0  14    0.52    0.77
  -1   0 -14   -0.79    1.02
   1   0  14    0.08    0.65
   5  -4   2   19.19    2.40
   5   4   2   16.76    3.07
  -5  -4  -2   18.79    2.53
   5   4   2   13.84    2.43
   5  -4   2   19.81    2.64
  -5  -4  -2   14.83    2.10
   6   0  -9   22.70    3.35
   6   0  -9   13.42    1.92
   6   0  -9   13.83    2.03
   6   0  -9    7.90    1.69
   4   4  -6   18.31    2.81
  -4   4   6   21.15    2.95
   4  -4  -6   24.52    3.45
   4   4  -6   21.98    3.18
   4  -4  -6   23.54    3.09
  -4  -4   6   22.71    2.87
  -6  -3  -4   11.89    1.81
   6   3   4   12.71    2.48
  -6  -3  -4   14.50    2.27
   6  -3   4   13.95    1.86
   6  -3   4   14.06    1.97
  -3   0 -13   -0.74    1.04
   3   0  13    0.20    0.77
   1   2  13   13.96    2.74
  -1  -2 -13   23.64    3.44
  -1  -2 -13   22.24    3.04
   1   2  13   23.45    3.35
   7   2  -3    5.07    1.79
   7   2  -3    3.08    1.02
   7  -2  -3    2.57    1.46
   7   2  -3    0.98    1.43
  -7  -2   3    2.85    1.16
   3   2 -12   26.41    3.49
   3  -2 -12   29.64    4.32
   3  -2 -12   30.64    4.22
  -3   2  12   23.78    3.64
  -3  -2  12   25.42    3.40
   3   2 -12   14.12    2.44
   4  -2 -11    8.82    2.10
   4   2 -11   10.15    2.30
  -4   2  11   13.83    2.14
   4  -2 -11    8.28    1.62
   4   2 -11    7.92    1.64
  -4  -2  11   11.47    1.74
   7   0   6   -0.69    1.04
   7   0   6   -0.60    1.43
  -7   0  -6   -0.01    0.96
  -4  -4  -6    9.20    1.62
  -4  -4  -6   10.46    1.81
   4  -4   6   11.68    1.68
   4   4   6   13.57    2.49
   7   2   3    0.90    0.77
   7   2   3    2.10    1.75
   7   2   3    1.38    1.54
   7  -2   3    1.14    0.95
  -7  -2  -3    0.54    0.94
   7  -2   3    1.26    0.81
   1   5  -5   14.80    2.52
  -1   5   5   11.45    2.64
   1  -5  -5   16.19    2.50
   1  -5  -5   16.01    2.34
  -1  -5   5   14.34    2.25
  -1  -5   5   23.62    3.20
   1   5   5    5.20    2.24
  -1   5  -5   10.31    2.57
  -1  -5  -5    6.13    1.36
   1   5   5    8.67    1.89
  -1  -5  -5    8.88    1.59
   0   1  14   -0.03    0.78
   0  -1  14    0.45    0.69
   0   1 -14    1.60    1.09
   0   1 -14    1.18    1.29
   0  -1 -14    0.81    1.34
   0  -1 -14    0.95    1.14
   4  -1 -12   19.40    2.90
   4   1 -12   20.24    2.90
   4   1 -12   11.97    2.40
   4  -1 -12   11.06    2.42
   5   0 -11    7.56    1.83
   5   0 -11   14.03    2.15
  -3  -2 -12   11.01    1.77
   3   2  12   11.21    1.94
  -3   2 -12   12.48    2.01
   3   2  12   12.84    2.66
  -3  -2 -12   12.55    2.23
   2  -5  -4    3.75    1.10
   2   5  -4    3.09    1.61
  -2   5   4    5.28    2.10
   2  -5  -4    3.04    0.94
  -2  -5   4    4.12    1.05
   2   5  -4    3.14    1.45
  -6   0  -9   54.39    7.07
   6   0   9   61.62    3.69
   6   0   9   65.98    4.18
   5   4  -3    4.74    1.79
  -5   4   3    4.76    1.05
   5  -4  -3    4.58    1.47
  -5  -4   3    6.47    1.43
  -5  -4   3    5.37    1.11
   5  -4  -3    6.13    1.38
   5   4  -3    6.71    2.16
  -5  -4   3    6.04    1.29
  -2   5  -4    5.35    1.59
  -2  -5  -4    3.57    1.10
   2   5   4    2.57    2.34
   2   5   4    4.24    1.54
   2  -5   4    3.71    0.84
  -2  -5  -4    2.62    0.99
  -4  -2 -11   11.28    2.07
   4   2  11   13.64    2.78
  -4  -2 -11   10.62    1.72
  -4   2 -11   10.87    1.85
   4   2  11    7.57    1.47
  -3  -5   0    6.20    1.24
   3  -5   0    5.22    1.04
   3   5   0    4.31    1.48
   3  -5   0    4.69    1.28
   3  -5   0    6.42    1.46
   3   5   0    3.57    1.87
  -3  -5   0    4.81    1.19
   3  -5   0    5.17    1.18
   3  -1 -13   -0.58    1.51
   3   1 -13    0.75    1.34
   3   1 -13    1.42    1.10
   3  -1 -13   -1.30    1.31
  -3   1  13    0.42    0.87
   3  -4  -8    8.60    2.04
   3  -4  -8    8.47    1.67
   3   4  -8    8.14    1.83
  -3   4   8    6.22    1.36
  -3  -4   8    8.43    1.44
   5   4   3   17.03    3.14
  -5  -4  -3   16.62    2.52
   5  -4   3   23.57    3.14
   5   4   3   25.11    3.74
  -5  -4  -3   29.42    3.99
  -2   4   9    5.77    2.24
  -2  -4   9    8.27    1.66
   2  -4  -9    6.51    1.49
  -2   4   9    8.36    1.78
  -2  -4   9    8.83    1.45
   2   4  -9    6.86    1.65
   3   5  -1    1.66    1.24
   3  -5  -1    2.14    1.16
  -3   5   1    2.03    0.94
  -3  -5   1    2.67    1.08
   3  -5  -1    2.27    0.90
   3  -5  -1    1.82    0.90
  -3  -5   1    1.47    0.79
   3   5  -1    3.92    2.13
   3  -5  -1    1.21    0.98
  -3  -5  -1    3.85    1.04
   3  -5   1    4.17    0.91
  -3  -5  -1    3.79    0.90
   3   5   1    4.04    1.60
  -3  -5  -1    2.02    0.95
   3   5   1    4.68    2.37
   3  -5   1    4.90    1.29
   1   1 -14    5.80    1.65
   1  -1 -14    4.66    1.36
   1   1 -14    5.50    1.29
  -1   1  14    2.73    0.99
  -1  -1  14    4.90    0.97
   1  -1 -14    4.86    1.82
   7  -1  -6    0.90    1.39
   7   1  -6    1.40    1.46
   7  -1  -6    1.13    1.19
   7   1  -6   -0.17    0.87
   7   1  -6    1.48    1.15
   4  -1  12   21.01    2.79
   4   1  12   19.02    2.71
  -4   1 -12   21.23    3.00
   4   1  12   20.30    3.08
  -4  -1 -12   20.41    3.05
   2   4   9   13.85    3.06
   2   4   9    7.01    1.64
  -2  -4  -9   14.20    2.35
  -2  -4  -9   13.33    2.09
  -2   4  -9   12.78    2.18
  -3  -4  -8   -0.08    1.29
  -3   4  -8   -0.41    1.04
   3   4   8    0.18    1.39
  -3  -4  -8   -0.06    1.08
   3   4   8   -2.09    1.97
   0   3  12   19.01    3.02
   0   3  12   13.17    2.82
   0  -3 -12   20.12    2.81
   0  -3 -12   23.12    3.37
  -1  -1 -14   18.15    2.78
  -1   1 -14   15.95    2.36
   1   1  14   18.24    2.99
   1   1  14   17.55    2.51
  -1  -1 -14   12.64    2.27
   1  -1  14   16.22    2.23
  -5   0 -11   13.45    2.20
   5   0  11   13.84    2.33
   5   0  11   14.56    2.13
   6   1  -9    4.49    1.15
   6  -1  -9    4.25    1.13
   6   1  -9    5.07    1.36
   6  -1  -9    6.20    1.44
   6   1  -9    4.14    1.61
   7  -2  -4    2.76    1.38
   7   2  -4    2.86    1.48
   7   2  -4    3.70    0.97
   7   2  -4    1.82    1.46
  -7  -2   4    4.19    1.32
   3   1  13    1.62    0.94
   3  -1  13    1.49    0.67
  -3  -1 -13    1.24    1.16
  -3   1 -13    1.27    1.20
   6   3  -5    3.17    1.41
  -6   3   5    3.39    1.05
   6   3  -5    2.49    1.50
  -6  -3   5    2.63    1.10
   6  -3  -5    4.61    1.40
   6   3  -5    3.64    0.93
   6  -3  -5    3.44    1.63
   3   5  -2    1.76    1.78
  -3   5   2    3.12    1.16
   3  -5  -2    2.80    0.96
  -3  -5   2    1.68    0.75
   3   5  -2    1.86    1.52
   3  -5  -2    3.66    1.33
   3  -5  -2    0.57    0.82
  -3  -5   2    2.44    1.06
  -2   0  14    3.13    0.91
   2   0 -14    4.05    1.39
   2   0 -14    3.70    1.52
   3  -5   2   17.81    2.47
  -3  -5  -2   19.71    2.68
   3   5   2   16.67    3.32
  -3  -5  -2   16.34    2.45
   3  -5   2   18.31    2.69
   3   5   2   18.97    3.11
  -3  -5  -2   17.07    2.47
   7  -1   6    3.43    1.08
   7   1   6    2.89    1.60
   7   1   6    1.05    1.04
   7   1   6    2.77    1.02
   7  -1   6    3.06    0.91
  -7  -1  -6    3.55    1.15
  -5  -3   8   12.30    2.06
   5   3  -8   10.66    2.25
   5  -3  -8   18.51    3.12
  -5   3   8    9.64    1.88
   5   3  -8   17.73    2.84
   2  -2 -13    1.10    1.54
   2   2 -13    4.48    1.63
  -2  -2  13    2.52    0.84
   2  -2 -13    2.04    1.28
  -2   2  13    1.73    1.74
  -2   2  13    3.68    1.30
   7   2   4    3.73    1.77
   7   2   4    3.11    0.95
   7  -2   4    3.42    0.94
   7   2   4    5.16    1.72
   7  -2   4    4.11    1.17
  -7  -2  -4    4.55    1.26
  -1   3  12   25.13    4.33
   1  -3 -12   36.02    4.85
  -1  -3  12   31.46    4.13
   1   3 -12   37.68    5.13
   6   3   5    7.11    2.37
  -6  -3  -5    9.47    1.93
   6   3   5    5.74    1.50
   6  -3   5    7.17    1.17
  -6  -3  -5    7.48    1.47
   5  -1 -11    3.39    1.56
   5  -1 -11    3.36    1.41
   5   1 -11    3.17    1.16
   5   1 -11    1.35    1.01
   5   1 -11    1.31    1.52
   5   2 -10    1.84    1.07
   5   2 -10    3.20    1.83
   5   2 -10    1.69    0.93
  -5   2  10    0.80    0.84
   5  -2 -10    2.81    1.43
   0  -5  -6   37.44    4.98
   0   5   6   17.22    2.70
   0  -5  -6   30.23    4.06
   0   5  -6   36.14    4.95
   0   5   6   20.15    3.67
   0  -5   6   32.19    4.24
  -2   0 -14   21.41    3.19
  -2   0 -14   21.11    3.07
   2   0  14   20.82    2.82
   1   3  12   11.01    2.39
  -1  -3 -12   16.48    2.38
  -1  -3 -12   23.62    3.42
  -6  -1  -9    6.65    1.66
   6   1   9    7.25    1.77
   6   1   9    7.70    1.57
   6  -1   9    7.83    1.38
  -6   1  -9    5.17    1.43
  -6  -1  -9    7.84    1.44
  -5   4   4    8.17    1.46
   5  -4  -4    8.45    1.63
   5   4  -4   10.57    2.40
   5   4  -4    4.94    1.73
  -5  -4   4    6.05    1.33
   5  -4  -4    8.40    1.80
   6  -2  -8    2.50    1.21
   6   2  -8    1.21    0.96
   6  -2  -8    0.55    1.43
   6   2  -8    1.01    1.55
   6   2  -8    0.24    1.25
  -2  -2 -13    7.68    1.33
  -2  -2 -13    9.61    1.84
   2   2  13    9.77    2.41
   0  -4 -10    0.67    1.17
   0  -4 -10    0.53    0.86
   0   4  10   -0.09    1.78
   0   4 -10   -1.23    1.33
   7   0  -7    0.55    1.16
   7   0  -7    0.65    1.01
   5  -3   8    7.31    1.18
  -5  -3  -8    7.55    1.45
   5   3   8    6.43    2.57
  -5  -3  -8    8.43    1.79
   5   3   8    8.29    1.87
   5   4   4    1.77    1.30
   5   4   4   -0.22    2.26
  -5  -4  -4    1.31    1.01
   5  -4   4    2.65    0.84
  -5  -4  -4    2.75    1.22
   2  -5  -5    9.93    1.71
   2   5  -5    6.16    1.74
  -2   5   5    8.77    2.41
   2  -5  -5   10.74    1.81
  -2  -5   5    8.97    1.48
   2   5  -5    8.59    1.86
   3  -3 -11    5.78    1.51
   3   3 -11    7.00    1.77
  -3  -3  11    4.91    1.18
  -3   3  11    5.61    1.42
  -3   3  11    3.17    1.67
   3   3 -11    3.67    1.58
   2   5   5    2.20    2.14
  -2  -5  -5    1.06    1.03
   2  -5   5    1.63    0.62
   2   5   5    1.72    1.22
  -2   5  -5    2.15    1.37
   3   5  -3    4.81    2.00
   3  -5  -3    1.42    0.86
   3  -5  -3    3.57    1.07
   3   5  -3    3.37    1.53
  -3  -5   3    3.80    1.10
   3  -5  -3    2.44    1.28
  -3   5   3    4.06    1.23
   4  -4  -7   24.70    3.47
   4   4  -7   14.75    2.62
   4   4  -7   20.06    3.15
  -4  -4   7   19.89    2.86
  -4   4   7   13.39    2.29
   4  -4  -7   11.16    2.14
   1   5  -6    1.45    1.55
   1  -5  -6    0.86    1.04
  -1   5   6    2.08    1.84
  -1  -5   6    2.60    0.85
   1  -5  -6    1.61    1.01
  -5   2 -10    7.79    1.62
  -5  -2 -10    5.14    1.47
   5   2  10    7.03    2.37
   5   2  10    3.71    1.15
  -5  -2 -10    6.29    1.31
   5   1  11    1.42    1.53
  -5   1 -11    0.11    1.20
  -5  -1 -11    0.90    1.25
   5  -1  11    0.83    0.66
   5   1  11    0.36    0.95
   3   5   3   30.22    4.40
  -3  -5  -3   25.08    3.45
   3  -5   3   27.01    3.56
  -3  -5  -3   31.27    4.19
   3   5   3   18.40    3.47
  -1   5  -6    0.54    1.23
   1  -5   6    2.16    0.74
   1   5   6    1.30    2.06
   1   5   6    2.57    1.34
  -1  -5  -6    0.66    1.01
   6   2   8    4.67    2.14
  -6  -2  -8    4.29    1.09
   6  -2   8    4.51    0.94
   6   2   8    6.77    1.61
   1   4 -10    7.78    1.76
   1  -4 -10    8.41    1.58
  -1   4  10    5.56    2.26
   1  -4 -10    7.90    1.63
  -1  -4  10    8.46    1.37
  -1   4  10    4.95    1.51
   8   0   0    8.56    1.86
   8   0   0    9.18    1.64
   4   3 -10    3.69    1.61
   4   3 -10    2.38    1.69
   4  -3 -10    3.93    1.95
  -4   3  10    3.46    1.24
  -3  -3 -11   13.92    2.15
   3   3  11    8.92    1.78
   3   3  11   15.18    2.99
  -1  -4 -10    1.69    1.12
   1   4  10    1.80    2.23
  -1  -4 -10    2.05    1.38
   1   4  10    1.08    1.16
  -1   4 -10    2.02    1.47
   4   4   7   23.41    4.00
   4  -4   7   29.50    3.82
  -4  -4  -7   20.86    3.04
   4   4   7   17.47    2.69
  -4  -4  -7   18.54    2.81
   7   0   7   12.49    2.25
   7   0   7   11.59    1.92
   7   0   7    8.48    1.44
   2   1 -14    2.42    1.20
   2   1 -14    0.80    1.28
   2  -1 -14    1.86    1.23
  -2   1  14    2.49    1.09
   2  -1 -14    4.65    1.90
   8   0  -1    5.14    1.52
   8   0  -1    4.35    1.16
   8   0   1    2.56    1.47
   8   0   1    4.21    1.13
   8   0   1    2.91    1.25
   7   2  -5    2.36    1.55
   7   2  -5    0.85    0.80
   7  -2  -5    0.98    1.32
   7   2  -5   -0.42    1.46
  -2  -1 -14   12.40    2.11
   2   1  14   11.44    2.22
   2   1  14    8.36    1.49
   2  -1  14   12.95    1.84
  -2   1 -14   11.54    1.90
   4   3  10    1.48    1.16
  -4  -3 -10    2.84    1.11
   8   0  -2   -0.31    1.24
   8   0  -2   -0.26    0.96
  -6  -3   6    1.95    1.29
  -6   3   6    0.92    0.93
   6  -3  -6    0.99    1.51
   6  -3  -6    1.03    1.05
   6   3  -6    0.96    1.32
   6   3  -6    0.09    1.37
   7   2   5   10.71    2.10
   7   2   5    8.59    1.82
   7  -2   5   13.57    2.07
  -7  -2  -5    8.91    1.57
   7  -2   5   11.63    1.73
   6   0 -10    7.19    1.55
   6   0 -10    3.46    1.56
   6   0 -10    4.68    1.25
   7  -1  -7    0.09    1.26
   7   1  -7    0.87    1.45
   7   1  -7    0.41    1.12
   7   1  -7    0.92    0.93
   7  -1  -7    2.03    1.75
  -2  -3  12    3.36    0.89
  -2   3  12    3.26    1.18
   2  -3 -12    2.76    1.49
   2  -3 -12    3.33    1.64
  -2   3  12    2.29    1.75
   8   0   2    1.70    1.24
  -8   0  -2    0.36    0.97
   8   0   2    0.42    1.20
   8   0   2    0.88    0.98
   5  -4  -5    1.29    1.37
   5   4  -5    1.14    1.60
  -5  -4   5    1.46    0.93
   5   4  -5    1.35    1.82
   5  -4  -5    2.41    1.03
  -5   4   5    2.42    0.94
   3   5  -4    5.65    1.54
   3   5  -4    6.96    2.00
   3  -5  -4    5.07    1.03
  -3  -5   4    3.00    0.84
  -3   5   4    5.18    1.20
   3  -5  -4    5.05    1.38
  -6  -3  -6   26.10    2.30
  -6  -3  -6   20.07    1.83
   6  -3   6   24.30    1.69
   6   3   6   17.06    1.94
   6   3   6   22.93    2.76
   4   0 -13    0.86    1.22
   4   0 -13    0.83    1.50
  -3  -5  -4   14.06    1.50
   3   5   4    7.18    2.16
   3   5   4    9.12    1.52
  -2  -3 -12    3.61    1.07
   2   3  12    3.80    1.28
   2   3  12    1.64    1.81
   5  -4   5    8.81    0.93
   5   4   5    5.62    1.48
   5   4   5    7.88    2.49
  -5  -4  -5    5.90    1.13
  -5  -4  -5    7.78    1.39
   3   4  -9    1.18    1.30
  -3  -4   9    1.45    0.82
   3  -4  -9    0.41    1.34
  -3   4   9    2.03    1.08
   3  -4  -9    1.19    1.35
   8  -1   0    5.61    1.40
   8   1   0    4.91    1.57
   8   1   0    3.98    0.98
  -8  -1   0    4.03    1.15
   8   1   0    3.99    1.38
  -7  -1  -7   -0.94    0.87
   7  -1   7    0.75    0.88
   7   1   7   -0.52    0.93
  -7  -1  -7   -0.74    1.28
   7  -1   7    0.17    0.73
   7   1   7    0.87    1.57
   8   1  -1    6.15    1.12
   8   1  -1    4.45    1.62
   8  -1  -1    6.53    1.24
   8   1  -1    4.24    1.40
   8  -1  -1    2.83    1.18
  -8  -1   1    3.75    1.17
   6   0  10   39.35    2.56
  -6   0 -10   36.50    2.67
   6   0  10   39.71    2.81
   8   0  -3    8.41    1.32
   8   0  -3    5.81    1.71
   8   1   1    3.02    0.88
   8   1   1    3.20    1.40
   8   1   1    4.19    1.35
   8  -1   1    5.43    1.38
  -8  -1  -1    2.36    1.03
   0   5   7    8.48    1.35
   0  -5  -7   11.68    1.29
   0   5  -7   18.54    2.11
   0   5   7   10.54    2.27
   0  -5   7   14.57    1.26
   2   5  -6    5.28    1.58
   2  -5  -6    7.81    1.23
   2  -5  -6    4.56    1.10
  -2  -5   6    7.36    1.01
  -2   5   6    4.58    2.05
  -3   4  -9    5.96    1.25
  -3  -4  -9    4.46    1.06
  -3  -4  -9    5.62    1.49
   3   4   9    3.11    2.16
   3   4   9    3.64    1.28
   0   2  14    0.00    1.51
   0  -2 -14    2.20    1.29
   0  -2 -14    1.53    1.58
   0   2  14    0.90    1.02
   4  -2 -12    5.15    1.91
   4   2 -12    5.62    1.47
   4   2 -12    4.57    1.78
  -4   2  12    2.34    1.01
   4  -2 -12    4.82    1.29
   2   5   6    5.94    2.47
  -2  -5  -6    5.33    1.04
   2   5   6    7.48    1.62
  -2   5  -6    5.29    1.27
  -2   4  10    4.82    1.34
   2   4 -10    6.44    1.49
  -2  -4  10    7.19    0.93
   2  -4 -10    5.75    1.63
   2  -4 -10    6.72    1.36
  -2   4  10    4.93    1.92
  -4   0 -13   28.98    2.32
   4   0  13   27.98    2.32
   4   0  13   27.78    1.94
   3   0 -14   12.79    1.59
  -3   0  14    5.85    0.92
   3   0 -14    7.46    1.67
   8   0   3   -0.40    1.25
  -8   0  -3    0.74    0.96
   8   0   3    1.33    1.21
   8   0   3    0.92    0.96
   0   0 -15    0.10    1.23
   0   0  15    2.01    0.76
   0   0 -15    1.80    1.28
   8   1  -2    5.20    1.41
   8   1  -2    3.54    0.91
   8   1  -2    3.50    1.48
   8  -1  -2    4.31    1.11
   8  -1  -2    4.02    1.38
   2   4  10   17.73    2.00
  -2  -4 -10   12.30    1.55
   2   4  10   18.41    2.82
  -2  -4 -10   15.59    1.72
  -2   4 -10   23.56    2.15
   3  -2 -13   13.02    2.07
   3  -2 -13   11.88    1.70
   3   2 -13    8.44    1.47
   3   2 -13    9.99    1.87
   6   1 -10    8.88    2.01
   6  -1 -10   10.92    1.54
   6   1 -10    8.68    1.23
   6   1 -10    6.72    1.24
   6  -1 -10    6.28    1.14
   5   0 -12   19.63    2.33
   5   0 -12   21.86    1.96
  -5   3   9    3.31    1.12
  -5  -3   9    3.89    1.25
   5  -3  -9    2.39    1.57
   5   3  -9    1.51    1.47
   5   3  -9    3.54    1.52
  -1  -5   7    5.93    0.89
   1  -5  -7    5.49    1.11
   1   5  -7    6.08    1.55
   1  -5  -7    7.00    1.24
  -1   5   7    5.66    2.09
   8  -1   2    7.72    1.36
   8   1   2    5.26    0.97
   8   1   2    3.85    1.36
  -8  -1  -2    5.76    1.16
   8   1   2    5.92    1.42
   7   0  -8    3.98    1.11
   7   0  -8    3.64    1.09
  -1   2  14    6.61    1.82
   1  -2 -14    6.22    1.77
   1  -2 -14    4.93    1.32
  -1   2  14    4.78    1.18
  -1  -5  -7   -0.12    0.89
   1   5   7    0.48    1.08
   1   5   7   -1.35    2.24
  -1   5  -7   -0.05    1.21
   7   2  -6   14.49    1.85
   7  -2  -6    7.98    1.81
   7   2  -6    9.99    1.16
   7  -2  -6   12.60    1.53
   7   2  -6   19.54    2.25
  -4  -2 -12   24.44    1.81
  -4   2 -12   25.94    2.03
   4   2  12   20.87    2.32
   4   2  12   15.28    1.64
  -4  -2 -12   21.08    1.96
  -7  -3   0    5.79    1.20
   7   3   0    5.78    1.62
   7   3   0    6.34    1.06
   7  -3   0    9.09    1.38
   7   3   0    6.99    1.71
   7  -3   0    8.18    1.22
  -3   0 -14    7.11    1.47
   3   0  14    6.67    0.93
   1   2  14    3.66    1.20
   1   2  14    2.55    1.65
  -1  -2 -14    2.73    1.26
  -1   0  15    0.55    0.80
   1   0 -15    0.23    1.00
   1   0 -15    0.42    1.32
   4  -1 -13   36.08    3.23
   4   1 -13   38.96    2.63
   4  -1 -13   42.99    2.95
  -6   2   9    0.37    0.80
   6   2  -9    0.68    0.90
   6   2  -9    0.84    1.75
   6  -2  -9    0.71    1.69
   6  -2  -9    1.00    1.09
   6   2  -9    1.09    1.23
   4   5   0    2.75    1.87
   4  -5   0    1.88    1.12
   4   5   0    1.77    1.30
   4  -5   0    2.02    0.85
  -4  -5   0    2.02    0.91
  -4  -5   0    1.98    1.00
   7   3  -1    9.90    1.20
   7   3  -1   10.46    2.06
   7  -3  -1   11.65    1.60
  -7  -3   1    9.75    1.34
   7   3  -1    9.01    1.82
   7  -3  -1    9.32    1.26
   4  -4  -8    0.37    1.61
  -4   4   8    2.58    1.14
  -4  -4   8    3.34    0.98
   4   4  -8    2.84    1.49
   4  -4  -8    2.55    1.15
   4   4  -8    2.91    1.50
   3   2  13   19.12    2.43
  -3  -2 -13   16.67    1.90
  -3  -2 -13   15.91    1.42
   3   2  13   12.76    1.45
   7  -3   1   16.85    1.52
   7   3   1   16.57    2.38
   7   3   1   16.89    1.54
  -7  -3  -1   21.65    1.85
   7  -3   1   18.71    1.76
   1   0  15    3.41    0.83
  -1   0 -15    2.25    1.25
  -1   0 -15    2.58    1.43
   4   5  -1    1.13    1.94
  -4  -5   1    2.96    0.88
  -4  -5   1    2.64    1.10
   4  -5  -1    1.46    0.81
   4   5  -1    1.08    1.56
   4  -5  -1    1.12    1.09
   3  -5  -5    0.95    1.33
  -3   5   5    0.28    1.10
   3   5  -5    1.88    1.53
   3  -5  -5    0.65    0.95
   3   5  -5    0.98    1.38
  -3  -5   5    0.85    0.87
   4  -5   1   13.46    1.60
  -4  -5  -1   13.35    1.36
   4   5   1   14.30    2.06
  -4  -5  -1   10.92    1.28
   4  -5   1   11.57    1.11
   4   5   1   12.55    2.38
  -5  -3  -9   11.10    1.40
   5   3   9    7.16    2.16
  -5  -3  -9    7.84    1.43
   5   3   9    5.11    1.29
   8   0  -4    8.69    1.28
   8   0  -4    5.27    1.57
  -7  -2  -6   14.47    1.46
   7   2   6   14.64    1.89
   7  -2   6   15.38    1.29
   7   2   6   18.63    1.93
  -7  -2  -6   13.78    1.70
   6  -1  10    2.54    0.77
   6   1  10    2.13    0.98
  -6   1 -10    2.72    1.33
  -6  -1 -10    4.17    1.43
   6   1  10    2.36    1.42
   5   0  12    0.22    0.72
  -5   0 -12    0.74    1.39
   5   0  12    1.52    1.30
  -3  -5  -5    2.18    0.89
  -3   5  -5    3.23    1.28
   3   5   5    1.82    2.38
   3   5   5    1.52    1.36
   8  -1  -3   15.15    1.94
   8  -1  -3    9.74    1.37
   8   1  -3    9.33    1.75
   8   1  -3   10.10    1.21
   8   1  -3   10.80    1.59
   4   4   8    5.36    2.50
  -4  -4  -8    4.31    1.27
  -4  -4  -8    7.73    1.31
   4   4   8    3.14    1.39
   5   4  -6    5.92    1.61
   5  -4  -6    7.23    1.54
   5   4  -6    9.94    1.93
   5  -4  -6    9.75    1.34
  -5   4   6    6.78    1.13
  -5  -4   6   13.10    1.44
   7   0   8   42.33    2.77
   7   0   8   44.93    2.25
   7  -3  -2   38.44    2.98
   7   3  -2   35.66    2.53
   7   3  -2   34.02    2.85
   7  -3  -2   32.73    2.55
  -7  -3   2   32.43    2.88
   7   3  -2   28.03    3.01
   5   2 -11    1.01    1.58
  -5   2  11    2.51    0.98
   5   2 -11    1.57    1.13
   5  -2 -11    1.53    1.19
  -6  -3   7    4.33    1.17
   6   3  -7    7.44    1.70
   6  -3  -7    4.71    1.53
   6   3  -7    5.76    1.70
  -6   3   7    8.78    1.22
   6  -3  -7    6.79    1.31
   4   1  13   18.07    1.50
  -4  -1 -13   17.39    1.85
  -4   1 -13   18.21    1.73
   4   1  13   17.20    2.16
  -6  -2  -9    8.86    1.17
  -6  -2  -9    8.89    1.46
   6   2   9   10.94    2.21
   6   2   9    6.72    1.26
   0   3  13    6.96    2.01
   0  -3 -13    7.88    1.53
   0   3  13    6.73    1.41
   0  -3 -13   10.18    1.23
   3   1 -14    1.13    1.39
   3  -1 -14    0.92    1.48
   3  -1 -14    3.06    1.23
   3   1 -14    3.76    1.19
  -3   1  14    1.46    0.91
   4  -5  -2    4.41    0.94
   4   5  -2    2.00    1.39
   4  -5  -2    3.24    1.23
   4   5  -2    4.32    2.09
  -4  -5   2    6.06    1.18
  -8  -1  -3    1.64    0.98
   8  -1   3    1.26    1.11
   8   1   3   -0.01    1.30
   8   1   3    2.16    1.01
   8   1   3    0.66    1.20
   8  -1   3    1.23    0.87
   7   3   2   27.86    2.10
   7   3   2   23.97    2.43
  -7  -3  -2   19.93    1.70
   7  -3   2   30.78    2.28
   7  -3   2   27.27    1.93
   0  -1 -15    5.80    1.72
   0  -1 -15    5.34    1.25
   0   1 -15    5.02    1.20
   0   1  15    3.48    0.95
   8   0   4    9.39    1.22
   8   0   4   10.37    1.45
   8   0   4    7.75    1.59
  -8   0  -4    8.19    1.23
   4  -5   2   13.49    1.22
   4   5   2   16.66    2.11
   4   5   2   17.61    2.79
  -4  -5  -2   13.48    1.53
  -4  -5  -2   13.16    1.40
   6  -4   0    6.22    1.04
   6   4   0    2.85    1.58
  -6  -4   0    5.44    1.17
   6  -4   0    5.69    1.25
   6   4   0    3.03    1.80
   0  -4 -11   -0.16    0.92
   0  -4 -11    2.07    1.21
   0   4  11    0.89    1.83
   0   4 -11    1.91    1.64
  -5  -4  -6    4.32    1.06
   5   4   6    3.56    1.43
  -5  -4  -6    4.17    1.18
   5  -4   6    5.87    0.80
   5   4   6    3.56    2.17
   5  -1 -12   16.85    1.81
   5  -1 -12    9.07    1.90
   5   1 -12   12.03    2.12
   5   1 -12   12.96    1.42
   5   1 -12    7.36    1.29
  -6  -4   1    8.71    1.28
   6  -4  -1    6.93    1.35
   6   4  -1    7.61    2.18
   6   4  -1    4.34    1.60
   6  -4  -1    5.87    0.99
   7   1  -8    4.49    1.18
   7   1  -8    4.30    1.03
   7  -1  -8    6.08    1.91
   7  -1  -8    7.66    1.37
   7   1  -8    8.28    1.95
   6  -4   1    0.68    1.07
  -6  -4  -1    0.05    1.10
   6  -4   1    0.51    0.77
   6   4   1   -0.27    1.78
  -6  -4  -1    1.19    0.98
   6   4   1   -0.10    1.39
   6   3   7    6.51    1.59
  -6  -3  -7    5.22    1.35
   6  -3   7    7.44    0.91
   6   3   7    4.31    2.24
  -6  -3  -7    4.88    1.08
   3   1  14    6.70    1.09
  -3  -1 -14    7.97    1.43
  -3   1 -14    6.54    1.28
  -1   3  13   -1.11    1.60
   1   3 -13    3.40    1.45
   1  -3 -13    2.03    1.45
   1  -3 -13    3.06    1.51
  -5  -2 -11    0.38    0.94
   5   2  11   -1.53    1.05
  -5   2 -11   -0.65    1.04
  -5  -2 -11   -0.20    1.22
   5   2  11   -0.14    1.63
   1  -1 -15    1.51    1.10
   1   1 -15    1.40    1.42
   1  -1 -15    1.87    1.75
   1   1 -15    1.87    1.09
  -1   1  15    1.46    0.99
  -1   4  11    9.23    2.20
   1  -4 -11   18.38    1.65
  -1   4  11   18.40    1.93
   1  -4 -11   12.69    1.58
   1   4 -11   17.87    1.96
  -1  -3 -13   -1.34    1.20
   1   3  13   -0.34    1.04
  -1  -3 -13    0.95    0.99
   1   3  13   -0.57    1.75
   7   3  -3    4.70    1.76
   7  -3  -3    3.09    1.38
   7  -3  -3    4.87    1.30
   7   3  -3    3.77    0.93
   7   3  -3    4.16    1.81
  -3   3  12    0.74    0.98
   3  -3 -12    1.95    1.28
   3  -3 -12    1.78    1.73
   3   3 -12    0.46    1.23
  -3   3  12   -1.21    1.33
   3   3 -12   -0.33    1.32
   1  -1  15    2.46    0.66
  -1   1 -15    1.44    1.06
   1   1  15    3.64    1.53
   1   1  15    2.31    0.81
  -1  -1 -15    1.91    1.38
  -1  -1 -15    4.36    1.50
  -4   3  11    4.59    1.20
   4  -3 -11    4.83    1.50
   4   3 -11    3.57    1.35
   4   3 -11    4.94    1.75
   6   4  -2    0.58    1.37
   6  -4  -2    2.52    1.04
  -6  -4   2    0.93    0.98
   6   4  -2    1.27    1.76
  -6  -4   2    1.37    0.98
   6  -4  -2    2.61    1.32
  -2   5   7    1.48    1.87
  -2  -5   7    1.89    0.78
   2  -5  -7    0.71    0.88
  -2   5   7    0.62    1.12
   2   5  -7    1.39    1.76
   2  -5  -7    1.03    0.94
   1   4  11    3.51    1.19
   1   4  11    3.24    1.97
  -1   4 -11    7.86    1.90
  -1  -4 -11    6.17    1.68
  -1  -4 -11    4.54    1.22
  -2   2  14    0.18    1.03
   2  -2 -14    1.94    1.30
   2   2 -14   -0.43    1.49
   2  -2 -14    3.50    1.72
   4  -5  -3    1.73    0.89
   4  -5  -3    0.75    1.17
  -4  -5   3    0.03    0.93
  -4   5   3    0.31    0.87
   4   5  -3    0.36    1.51
   8   1  -4    1.00    1.24
   8   1  -4    2.69    1.07
   8  -1  -4    3.38    1.25
   8   1  -4    2.17    1.74
   8  -1  -4    1.88    1.57
  -6  -4  -2    1.68    1.04
   6   4   2    1.15    1.86
   6  -4   2    1.49    0.75
   6   4   2    1.08    1.40
  -6  -4  -2    1.44    1.05
  -5   1 -12   -0.39    1.09
   5   1  12   -1.23    1.62
  -5  -1 -12    1.40    1.43
   5   1  12    0.55    0.84
   7   3   3    1.93    1.41
   7  -3   3    4.24    1.08
   7   3   3    2.56    1.97
  -7  -3  -3    4.61    1.54
  -7  -3  -3    2.98    0.99
   2   5   7    7.01    2.43
  -2   5  -7   10.68    2.13
  -2  -5  -7    5.78    1.33
   2   5   7    4.96    1.50
  -2  -5  -7    5.50    1.29
   2   0 -15   -0.88    1.21
  -2   0  15    0.14    0.71
   2   0 -15   -1.08    1.39
   4  -5   3    2.02    0.68
   4   5   3    3.01    2.35
   4   5   3    1.93    1.30
  -4  -5  -3    1.15    0.92
   7   1   8    2.82    1.54
   7  -1   8    3.88    1.02
   7  -1   8    2.92    0.92
  -7  -1  -8    2.90    1.38
  -7  -1  -8    3.89    1.15
   7   1   8    4.00    1.26
  -3  -3 -12    0.70    1.05
   3   3  12    0.46    1.06
   3   3  12    1.80    1.97
   2   2  14   12.25    2.61
  -2  -2 -14   11.40    2.26
   2   2  14   13.21    2.28
  -2  -2 -14   11.63    1.93
   0   5   8    7.16    1.73
   0   5   8    6.08    2.44
   0  -5  -8    8.85    1.78
   0   5  -8    7.47    1.81
   8   0  -5    4.98    1.40
   8   0  -5    2.84    1.51
  -4  -3 -11    5.97    1.43
   4   3  11    4.22    1.28
   8   1   4    4.09    1.04
   8  -1   4    6.79    1.52
   8   1   4    5.53    1.67
   8   1   4    4.67    1.43
  -8  -1  -4    8.36    1.68
   8  -1   4    4.95    1.12
  -2   0 -15    1.09    1.10
   2   0  15    1.10    0.71
   6   0 -11   55.20    2.07
   6   0 -11   44.88    3.28
   6   0 -11   31.90    4.95
   7   2  -7    9.83    2.14
   7  -2  -7   17.06    2.79
   7   2  -7   13.33    2.19
   7   2  -7   12.92    2.39
   7  -2  -7   15.11    3.03
   3   5  -6    3.28    1.83
  -3  -5   6    3.15    0.87
   3   5  -6    3.31    1.42
  -3   5   6    3.10    1.18
   3  -5  -6    2.68    0.96
   3  -5  -6    3.05    1.40
   3  -4 -10   -1.06    1.36
   3  -4 -10    0.34    1.16
  -3  -4  10    0.11    0.75
  -3   4  10    0.61    1.12
   6  -4  -3    3.89    1.39
   6   4  -3    2.41    1.59
   6  -4  -3    5.60    1.33
  -6  -4   3    2.92    1.05
   6   4  -3    4.66    2.08
  -3  -5  -6    4.55    1.33
   3   5   6    5.92    2.56
  -3   5  -6    6.44    1.61
   3   5   6    5.26    1.78
  -3  -5  -6    4.20    1.15
   8   0   5    0.27    1.07
   8   0   5    1.14    1.30
  -8   0  -5    1.50    0.97
  -1  -5   8   17.14    2.60
  -1   5   8   10.89    2.71
   1   5  -8   16.06    2.80
   1  -5  -8   16.58    2.70
  -1   5  -8    3.33    1.50
   1   5   8    2.61    2.02
  -1  -5  -8    3.27    1.05
  -1  -5  -8    4.10    1.35
   1   5   8    3.25    1.16
   6   4   3    3.70    1.65
   6  -4   3    2.23    0.77
  -6  -4  -3    0.70    0.98
   6   4   3    2.26    1.90
  -6  -4  -3    2.06    0.96
   7   3  -4    0.93    0.80
   7  -3  -4   -0.53    1.34
   7  -3  -4    0.62    1.22
   7   3  -4    0.90    1.57
   7   3  -4    1.60    1.69
  -3   4 -10    3.84    1.35
  -3  -4 -10    3.92    1.37
   3   4  10    3.92    2.32
  -3  -4 -10    3.76    1.04
   8  -2   0    4.83    1.34
   8   2   0    4.21    1.82
   8   2   0    4.44    1.18
   8   2   0    2.69    1.56
  -8  -2   0    4.85    1.47
   8  -2   0    3.07    1.22
   7   2   7   19.88    3.48
   7  -2   7   27.61    4.03
   7   2   7   19.46    3.12
  -7  -2  -7   20.32    3.13
  -5   4   7    1.32    0.84
   5  -4  -7    1.43    1.25
   5   4  -7    0.12    1.33
   5  -4  -7    0.76    1.39
  -5  -4   7    1.54    1.02
   5   4  -7    1.03    1.62
   7   0  -9   27.79    4.21
   7   0  -9   28.94    4.59
   7   0  -9   24.73    3.77
   4  -5  -4    3.75    1.00
  -4   5   4    2.92    0.94
   4  -5  -4    2.77    1.31
  -4  -5   4    3.10    0.90
   4   5  -4    3.16    1.73
   8   2  -1    3.68    0.95
   8  -2  -1    5.19    1.41
   8   2  -1    3.33    1.57
  -8  -2   1    3.96    1.34
   8   2  -1    1.50    1.35
   8  -2  -1    5.06    1.52
   8   2   1   20.63    3.44
   8   2   1   25.27    3.73
   8   2   1   24.63    3.97
   8  -2   1   24.05    3.60
   8  -2   1   25.05    3.83
  -8  -2  -1   15.03    2.45
  -6   0 -11    2.63    1.47
   6   0  11    1.82    1.32
   6   0  11    2.27    0.84
   2  -3 -13    1.27    1.29
  -2   3  13    0.56    1.60
   2  -3 -13    2.20    1.61
  -2  -3  13    1.66    0.81
   7   3   4    3.39    1.38
  -7  -3  -4    2.93    1.39
   7   3   4    1.67    1.70
   7  -3   4    2.67    0.85
  -7  -3  -4    3.80    1.26
   2  -1 -15    3.65    1.59
  -2   1  15    6.70    1.48
   2  -1 -15    4.94    1.40
   2   1 -15    5.33    1.72
  -4  -5  -4    0.66    0.98
   4   5   4   -0.64    1.90
   4   5   4   -0.27    1.27
   5  -3 -10    1.74    1.83
   5   3 -10    3.01    1.36
  -5   3  10    1.24    0.92
   5   3 -10    1.75    1.80
   4  -4  -9    2.15    1.46
  -4   4   9    1.39    0.94
   4  -4  -9   -0.18    1.06
   4   4  -9    1.42    1.38
   4   4  -9    1.20    1.43
   2   4 -11    6.64    1.78
  -2   4  11    5.59    1.47
  -2   4  11    4.48    1.94
   2  -4 -11    9.22    2.02
  -2  -4  11    5.74    1.13
   8  -1  -5    5.22    1.43
   8   1  -5    7.54    1.69
   8  -1  -5   10.64    2.37
   8   1  -5    8.36    1.60
   5  -4   7    2.02    0.61
  -5  -4  -7    1.29    1.04
   5   4   7    2.60    2.39
  -5  -4  -7    1.15    1.11
   6   3  -8   13.39    2.48
  -6  -3   8   15.28    2.59
   6   3  -8    9.53    2.26
   6  -3  -8    7.16    1.87
  -6   3   8   11.96    2.08
   2   3  13    2.09    1.85
  -2  -3 -13    2.53    1.26
  -2  -3 -13    2.22    0.91
   8   2  -2    7.46    1.94
   8   2  -2    9.17    1.66
  -8  -2   2   10.69    2.05
   8  -2  -2    5.11    1.29
   8  -2  -2    8.15    1.84
  -2   1 -15    9.84    1.90
  -2  -1 -15    7.05    1.77
   2  -1  15    9.44    1.54
   2   1  15    9.16    2.20
   6  -1 -11    4.65    1.40
   6  -1 -11    2.69    1.66
   6   1 -11    4.37    1.89
   6   1 -11    2.62    0.93
   6   1 -11    3.75    1.16
   6  -2 -10    1.41    1.49
   6   2 -10    1.69    1.72
   6   2 -10    2.09    1.19
  -6   2  10    1.74    0.92
   6  -2 -10    1.70    1.10
  -2  -4 -11    5.12    1.29
   2   4  11    4.10    1.28
  -2   4 -11    8.00    1.91
   2   4  11    5.10    2.28
  -2  -4 -11    6.03    1.74
   8   2   2   19.18    3.27
  -8  -2  -2   23.91    3.62
   8  -2   2   18.54    2.94
   8  -2   2   16.24    2.54
   8   2   2   20.45    3.11
   8   2   2   14.27    2.63
   4   4   9    9.07    2.60
  -4  -4  -9    9.84    1.91
  -4  -4  -9   11.32    2.01
   6   4  -4    1.78    1.66
   6   4  -4    1.02    1.48
   6  -4  -4    1.29    0.94
  -6   4   4    0.84    0.80
  -6  -4   4    1.04    0.99
  -7   0  -9   30.62    4.67
   7   0   9   28.95    4.26
   7   0   9   29.16    4.44
   4   0 -14    3.34    1.47
   4   0 -14    1.49    1.29
   8   1   5    5.75    1.73
   8  -1   5    5.17    1.17
   8   1   5    5.08    1.16
  -8  -1  -5    6.88    1.49
   8  -1   5    7.26    1.54
   8   1   5    6.62    1.65
   5   3  10    5.89    1.65
  -5  -3 -10    3.67    1.00
   5   3  10    4.25    2.48
  -5  -3 -10    3.75    1.29
   4   2 -13    0.50    1.14
   4  -2 -13    0.26    1.20
   4   2 -13    0.61    1.51
  -4   2  13    0.21    1.02
   4  -2 -13   -0.88    1.51
   6   4   4    7.25    2.34
   6   4   4    6.39    1.76
  -6  -4  -4    9.41    1.87
  -6  -4  -4    7.46    1.55
   6  -4   4    9.21    1.54
   8   0  -6   -0.18    1.48
   8   0  -6    1.58    1.12
   6   3   8    1.15    1.22
  -6  -3  -8    1.69    1.39
   6   3   8    0.14    1.90
  -6  -3  -8    0.18    0.94
   7   1  -9   11.85    2.37
   7   1  -9   19.24    3.09
   7  -1  -9   20.75    3.23
   7   1  -9   23.46    3.57
   7  -1  -9   10.63    2.29
   5   0 -13    0.83    1.48
   5   0 -13   -0.31    1.27
   6   2  10   17.28    3.22
  -6   2 -10   19.41    3.12
  -6  -2 -10   13.41    2.39
   6   2  10   15.86    2.66
  -6  -2 -10   17.81    2.76
   0   6   0    0.41    1.76
   0  -6   0    2.18    0.93
   8   2  -3    8.24    1.58
   8   2  -3    5.75    1.76
   8  -2  -3    7.30    1.79
  -8  -2   3    5.85    1.47
   7   3  -5    2.05    1.51
  -7  -3   5    1.25    1.15
   7  -3  -5    1.15    1.03
   7  -3  -5    2.34    1.40
   7   3  -5    2.21    1.68
  -6   1 -11   10.32    2.01
  -6  -1 -11    9.99    2.12
   6   1  11  126.81   33.81
   6   1  11   11.18    2.26
   2  -5  -8    1.37    1.15
   2   5  -8    1.82    1.72
  -2   5   8   -0.12    1.05
  -2  -5   8    1.27    0.71
   4   0  14    2.04    0.79
  -4   0 -14    1.74    1.14
   0  -6  -1    6.11    1.28
   0   6  -1    5.98    2.01
   0   6   1    5.71    2.36
  -2  -5  -8    6.02    1.40
   2   5   8    4.45    2.22
  -2   5  -8   10.15    2.07
   2   5   8    5.75    1.48
  -2  -5  -8    7.70    1.65
  -4   5   5    0.66    0.94
   4  -5  -5    0.85    0.95
   4   5  -5   -1.97    1.37
  -4  -5   5   -0.10    0.91
   4   2  13    2.63    1.64
  -4  -2 -13    1.28    0.92
  -4  -2 -13    2.23    1.24
   4   2  13    2.42    1.00
   8   0   6   -0.14    1.06
   8   0   6   -0.11    1.28
   3   2 -14   -0.03    1.25
   3  -2 -14    0.15    1.37
   3   2 -14    0.71    1.56
   3  -2 -14   -0.46    1.56
   8   2   3   13.59    2.65
   8   2   3   15.29    2.43
   8  -2   3   13.66    2.21
   8  -2   3   14.88    2.45
   8   2   3   10.85    2.26
  -8  -2  -3   14.17    2.40
   3  -5  -7    4.28    1.32
   3   5  -7    3.20    1.53
  -3   5   7    1.93    1.09
   3  -5  -7    2.69    1.44
   0   2  15   13.03    2.33
   0   2  15   11.43    2.51
   0  -2 -15   12.60    2.53
   0  -2 -15   21.83    3.47
   7   3   5    1.73    1.29
  -7  -3  -5    1.19    1.22
   7  -3   5    1.29    0.64
   7   3   5    1.39    1.90
  -7  -3  -5    1.12    0.99
   3   0 -15    0.72    1.16
   3   0 -15   -0.15    1.41
   4   5   5    2.62    2.07
  -4  -5  -5    3.82    1.24
   4   5   5    2.63    1.41
   5   2 -12    2.70    1.63
   5  -2 -12    2.61    1.54
   5   2 -12    6.55    1.69
   5  -2 -12    8.57    1.92
  -5   2  12    7.94    1.64
   3   5   7    8.18    2.99
  -3  -5  -7    6.88    1.61
  -3  -5  -7    9.31    1.88
  -3   5  -7   12.57    2.25
   3   5   7    3.52    1.60
   1   6   0    9.80    1.95
   1   6   0    3.46    1.90
  -1   6   0    8.18    2.46
  -1  -6   0    7.45    1.44
   7   2  -8    8.38    2.29
   7   2  -8    7.93    1.58
   7  -2  -8    7.62    1.73
   7  -2  -8    6.49    1.86
  -7  -1  -9   13.58    2.56
   7   1   9    9.65    2.14
  -7   1  -9   10.10    1.99
   4   1 -14    5.00    1.96
   4  -1 -14    4.58    1.37
   4   1 -14    4.74    1.23
  -4   1  14    3.49    0.89
   4  -1 -14    4.13    1.97
   0  -6  -2    4.65    1.04
   0  -6  -2    3.50    0.91
   0   6   2    5.66    2.16
   0   6   2    5.63    1.45
   0   6  -2    6.22    2.18
   5   0  13   12.55    2.46
  -5   0 -13   12.18    2.29
   5   0  13   12.57    2.03
   0   5  -9    0.52    1.51
   0  -5  -9    1.05    1.04
   0   5   9    1.53    1.95
   0  -5  -9    1.46    0.98
   1  -6  -1    9.65    1.73
   1   6  -1   10.98    2.57
  -1  -6   1   11.38    1.93
  -1   6   1    8.95    2.52
   1   6   1   16.02    2.75
  -1   6  -1   10.28    2.25
   1   6   1    9.32    2.47
  -1  -6  -1   17.11    2.72
   0  -4 -12    4.01    0.94
   0   4  12    5.11    2.24
   0   4 -12    6.27    1.65
   0  -4 -12    7.99    1.75
   3   2  14   21.24    3.06
  -3  -2 -14   20.06    2.40
  -3  -2 -14   16.47    2.30
  -1   2  15    6.62    1.38
   1  -2 -15    4.75    1.55
  -1   2  15    9.40    2.12
   1  -2 -15    8.31    1.61
   0   0 -16    4.77    1.25
   0   0 -16    4.96    1.69
   8  -1  -6    7.76    2.15
   8  -1  -6    3.86    1.09
   8   1  -6    5.69    1.54
   8   1  -6    4.52    1.14
   6   4  -5    4.85    1.70
  -6   4   5    7.23    1.23
  -6  -4   5    9.55    1.63
   6   4  -5    4.80    1.62
   6  -4  -5    5.75    1.30
   1   2  15    2.04    1.48
   1   2  15    1.95    0.96
  -1  -2 -15    4.18    1.44
  -3   0 -15    2.43    1.34
   3   0  15    2.28    0.75
   5  -1 -13    6.70    1.41
   5   1 -13    9.41    1.55
   5   1 -13   12.57    2.32
   5  -1 -13    5.63    1.82
   5   1 -13    8.71    1.62
   8   2  -4    0.36    1.40
   8  -2  -4    0.18    1.36
  -8  -2   4   -0.24    1.11
   8   2  -4   -0.09    0.74
  -5  -2 -12    8.83    1.41
   5   2  12   10.02    2.17
   5   2  12    8.52    1.42
  -5  -2 -12    9.65    1.85
   5   4  -8    3.30    1.42
   5   4  -8    3.81    1.49
  -5  -4   8    8.76    1.42
  -5   4   8    8.18    1.45
   5  -4  -8    6.48    1.40
   5  -4  -8    4.83    1.51
  -5  -5   0    6.23    1.29
   5  -5   0    6.13    1.11
  -5  -5   0    9.30    1.46
   5   5   0    2.79    2.02
   5   5   0    5.75    1.75
   1   6  -2    6.20    2.06
   1  -6  -2    6.11    1.22
  -1   6   2    5.81    2.29
   1  -6  -2    4.61    0.94
   1  -5  -9    4.55    1.35
   1   5  -9    2.47    1.65
  -1   5   9    2.61    2.06
   7  -2   8    0.20    0.76
   7   2   8   -0.74    1.64
  -7  -2  -8    0.23    0.84
   7   2   8    0.34    1.05
   1  -6   2    9.62    1.38
   1   6   2    8.00    1.62
  -1  -6  -2   11.17    1.65
   1   6   2    7.26    2.26
  -1   6  -2    7.44    1.90
   1  -4 -12    4.86    1.42
  -1   4  12    4.04    1.29
  -1   4  12    2.79    1.95
   1   4 -12    3.62    1.42
  -6  -4  -5    3.76    1.25
   6   4   5    2.52    2.29
   6  -4   5    2.19    0.66
   6   4   5    1.83    1.30
  -6  -4  -5    2.90    1.19
   4   1  14   16.40    2.50
  -4  -1 -14   12.94    2.04
  -4   1 -14   14.49    2.08
   0  -3 -14   16.96    2.33
   0   3  14   10.88    1.92
   0   3  14   11.52    2.30
  -1   0  16    4.17    0.85
   1   0 -16    3.91    1.65
   1   0 -16    4.04    1.21
   4  -3 -12    9.84    1.83
   4   3 -12    6.94    1.62
   4   3 -12    5.24    1.58
  -4   3  12    9.74    1.63
  -1  -5  -9   -0.02    1.01
   1   5   9    0.96    1.16
   1   5   9   -1.15    1.95
  -1  -5  -9    0.34    0.92
  -1   5  -9    0.64    1.47
   5  -5  -1    8.66    1.60
  -5  -5   1    8.57    1.49
   5   5  -1    5.41    1.57
   5   5  -1    7.49    2.14
  -5  -5   1    8.59    1.38
  -1  -4 -12    4.35    1.09
   1   4  12    5.65    2.28
  -1   4 -12    7.36    1.63
  -1  -4 -12    5.58    1.61
   5   5   1    3.10    1.42
  -5  -5  -1    4.78    1.31
  -5  -5  -1    4.17    0.96
   5  -5   1    3.89    0.80
   8  -1   6    3.33    0.93
   8   1   6    3.99    1.01
   8   1   6    1.77    1.04
  -8  -1  -6    2.72    1.05
   8   1   6    1.40    1.44
   8  -1   6    2.56    0.99
  -1   0 -16    1.82    1.14
   8  -2   4    4.26    0.84
   8   2   4    5.00    1.59
   8   2   4    1.96    1.29
  -8  -2  -4    7.70    1.40
   8   2   4    5.39    1.10
   0   6   3   13.85    2.08
   0   6  -3    8.44    2.00
   0   6   3   11.92    2.70
   0  -6   3   15.31    1.90
   0  -6  -3   12.71    1.80
   0  -6  -3   14.37    1.82
   3  -3 -13    3.85    1.30
   3  -3 -13    1.94    1.53
  -3   3  13    1.80    1.02
   3   3 -13    2.42    1.37
  -3   1  15    4.21    1.07
   3  -1 -15    1.56    1.17
   3   1 -15    4.94    1.73
   3  -1 -15    1.50    1.47
  -5  -4  -8    4.50    1.40
   5  -4   8    3.37    0.63
  -5  -4  -8    2.74    1.03
   5   4   8    2.39    2.06
  -1   3  14    0.68    1.05
   1   3 -14    3.46    1.49
   1  -3 -14    4.13    1.32
   1  -3 -14    2.16    1.46
  -1   3  14    2.95    1.61
   3  -4 -11   22.42    2.81
  -3  -4  11   20.15    2.37
  -3   4  11   13.17    1.87
   3  -4 -11   11.73    2.39
  -7  -3   6    5.98    1.47
   7  -3  -6    4.63    1.40
   7   3  -6    4.20    1.63
   7  -3  -6    8.29    1.57
   7   3  -6    6.96    1.82
   5  -5  -2    6.05    1.43
   5   5  -2    5.59    1.63
   5   5  -2    4.72    1.93
  -5  -5   2    5.95    1.25
   8   0  -7   -0.58    1.42
   8   0  -7   -0.39    0.99
  -4  -3 -12    4.24    0.97
   4   3  12    4.47    1.19
   7   0 -10    9.23    1.53
   7   0 -10    6.79    1.78
   7   0 -10   11.52    1.75
  -5  -1 -13   16.49    2.28
   5   1  13   16.25    2.38
  -5   1 -13   20.02    2.52
   6   0 -12    2.74    1.09
   6   0 -12    4.96    1.83
   6   0 -12    4.65    1.27
   1   3  14    4.90    1.32
   1   3  14    3.09    1.65
  -1  -3 -14    4.40    1.01
  -1  -3 -14    4.98    1.47
   5   5   2    3.10    1.54
  -5  -5  -2    0.96    0.90
   5  -5   2    1.42    0.71
  -6  -3   9    5.85    1.34
   6  -3  -9    5.88    1.73
  -6   3   9    4.23    0.93
   6   3  -9    9.36    2.13
   6   3  -9    3.34    1.29
   0  -1 -16    3.23    1.22
   0   1  16    3.24    0.93
   0  -1 -16    3.94    1.71
   4   5  -6   -0.73    1.34
   4  -5  -6   -0.08    0.95
  -4   5   6   -0.15    0.97
   4  -5  -6   -0.64    1.32
  -4  -5   6   -0.60    0.79
  -1   6   3   14.86    2.92
   1   6  -3   18.68    2.91
   1  -6  -3   16.59    2.03
   1  -6  -3   14.15    1.87
  -3  -3 -13    1.50    1.27
   3   3  13    0.91    2.19
   3   3  13    0.12    0.99
  -3  -3 -13    0.24    0.97
  -1   6  -3    9.18    1.94
   1  -6   3   12.37    1.61
   1   6   3    5.20    2.21
  -1  -6  -3   11.16    1.53
  -1  -6  -3   12.92    1.88
   1   6   3   11.56    1.89
  -3   1 -15    2.62    1.18
  -3  -1 -15    2.24    1.22
   3   1  15    2.78    0.92
   4   4 -10    6.44    1.53
   4  -4 -10    9.61    1.72
   4   4 -10   11.37    1.98
   4  -4 -10    6.17    1.70
  -4   4  10    8.50    1.53
  -3  -4 -11   32.34    1.92
  -3  -4 -11   26.46    3.06
   3   4  11   21.32    3.42
  -3   4 -11   34.05    1.87
   2   6   0   -0.23    1.09
  -2  -6   0    0.11    0.79
   2   6   0    2.25    2.21
   7   3   6   11.38    2.45
  -7  -3  -6   14.72    1.97
   7   3   6   19.76    2.71
  -7  -3  -6   16.03    2.35
   7  -3   6   17.01    2.00
   4   5   6    3.99    2.19
  -4  -5  -6    4.06    1.15
   4   5   6    4.18    1.56
  -4  -5  -6    3.18    1.12
   2  -2 -15    1.97    1.82
   2  -2 -15    0.98    1.21
  -2   2  15    2.39    0.99
   2   6  -1    1.43    2.19
   2  -6  -1    2.00    0.74
  -2  -6   1    3.02    0.86
   2   6  -1    2.92    1.41
   2   6   1    3.71    2.10
  -2  -6  -1    1.63    0.86
   2  -6   1    3.56    0.79
   2   6   1    3.60    1.44
   1  -1 -16    3.78    1.55
   1  -1 -16    6.30    1.56
  -1   1  16    5.69    1.16
   5   3 -11    7.73    1.65
   5  -3 -11    8.52    1.71
  -5   3  11    4.56    1.22
   5   3 -11    4.48    1.70
   5  -3 -11    6.15    1.84
   8   0   7   -0.38    1.19
   8   0   7    0.32    0.97
   8   0   7    0.40    0.78
   8  -2  -5   -0.04    1.23
   8   2  -5    0.22    1.45
   8   2  -5    1.52    1.42
   8   2  -5   -0.06    0.85
   8  -2  -5    0.47    1.07
   6  -3   9    7.88    1.14
   6   3   9    7.96    2.49
  -6  -3  -9    7.18    1.55
   6   3   9    9.45    1.77
  -6  -3  -9    9.38    1.58
  -4  -4 -10   22.64    2.92
  -4  -4 -10   16.59    2.12
   4   4  10   17.98    3.27
   5   5  -3    1.19    1.82
   5   5  -3    1.87    1.41
  -5  -5   3    1.31    0.92
   5  -5  -3    2.62    1.25
   5  -5  -3    1.70    0.95
  -1  -1 -16    0.74    1.33
  -1  -1 -16    1.19    1.54
   1   1  16    2.53    0.88
   1  -1  16    2.21    0.66
   7   0  10    1.61    0.91
  -7   0 -10    1.32    1.50
   0  -6   4    2.59    0.78
   0  -6  -4    1.91    0.85
   0  -6  -4    2.44    1.08
   0   6   4    0.65    1.98
   0   6  -4   -0.02    1.51
   0   6   4    2.13    1.00
  -6  -4   6    6.40    1.31
  -6   4   6   11.40    1.61
   6  -4  -6    9.15    1.90
   6   4  -6   10.23    2.19
   6  -4  -6    9.07    1.54
   6   4  -6    6.51    1.80
   2   2  15    7.45    1.33
  -2  -2 -15    7.79    1.20
  -2  -2 -15   11.61    1.98
  -6   0 -12    8.99    1.80
   6   0  12    6.35    1.63
   6   0  12    7.25    1.15
   6   2 -11    1.39    1.23
   6  -2 -11    1.75    1.19
   6   2 -11    1.21    1.52
  -6   2  11    2.25    0.94
  -3   5   8    1.18    1.01
  -3  -5   8    2.57    0.82
   3   5  -8    2.18    1.46
   3  -5  -8    2.45    1.16
   3  -5  -8    1.17    1.31
  -5  -5  -3    2.02    0.96
   5  -5   3    2.70    0.71
   5   5   3    2.11    1.38
   2   5  -9    1.49    1.46
   2  -5  -9    1.07    1.06
  -2   5   9    1.89    1.32
  -2  -5   9    1.09    0.69
   2   4 -12    7.66    1.71
  -2   4  12    3.77    1.85
   2  -4 -12    8.79    1.77
  -2  -6   2    2.01    0.76
   2  -6  -2    2.54    0.98
   2  -6  -2    1.50    0.73
   2   6  -2    0.93    2.02
   2   0 -16    1.97    1.50
   2   0 -16    1.48    1.07
  -2   0  16    0.69    0.80
  -2  -6  -2    1.67    1.01
   2   6   2    1.28    2.32
   2   6   2    0.70    1.26
   2  -6   2    0.96    0.66
   8  -1  -7   10.00    2.20
   8   1  -7    5.97    1.22
   8  -1  -7   11.90    1.84
   7  -1 -10   -0.04    1.20
   7   1 -10    1.44    1.10
   7   1 -10    0.81    1.04
   7   1 -10    0.75    1.58
  -8  -2  -5    4.76    1.24
   8   2   5    4.00    0.90
   8   2   5    3.19    1.26
   8  -2   5    3.98    0.83
  -2  -5  -9    3.35    1.09
  -2   5  -9    4.83    1.46
   2   5   9    0.76    2.37
   2   5   9    2.66    1.12
   3   5   8   -0.10    1.99
  -3  -5  -8    0.73    1.08
  -3   5  -8    1.12    1.16
   3   5   8    0.03    1.19
   6   1 -12    5.16    1.83
   6  -1 -12    7.29    1.90
   6  -1 -12   13.33    2.02
   6   1 -12   12.96    1.86
   5   3  11   11.51    2.75
   5   3  11    8.66    1.57
  -5  -3 -11    7.36    1.24
  -6  -4  -6    2.00    1.09
   6   4   6    2.92    1.99
  -6  -4  -6    4.09    1.17
   6  -4   6    3.63    0.69
   2   4  12    0.86    1.99
  -2  -4 -12    1.88    0.93
  -2  -4 -12    1.09    1.36
  -2   4 -12    2.78    1.29
  -1   6   4    8.41    2.41
   1  -6  -4   10.78    1.67
   1   6  -4    8.49    2.00
   1  -6  -4    7.13    1.20
   1   6   4   -0.34    1.95
  -1  -6  -4    0.54    0.94
   1  -6   4   -0.12    0.63
  -1  -6  -4    0.61    0.79
   1   6   4    0.36    1.26
  -1   6  -4    0.23    1.64
   2   0  16    1.72    0.69
  -2   0 -16    0.77    0.95
   2  -3 -14   11.75    2.23
   2  -3 -14   12.25    2.05
  -2   3  14    5.76    1.68
   7  -2  -9    4.56    1.77
   7   2  -9    6.72    1.88
   7   2  -9    4.91    1.48
   9   0   0    1.51    0.91
   9   0   0   -0.68    1.10
   6   2  11    4.82    1.16
   6   2  11    7.72    1.95
  -6  -2 -11    7.57    1.33
  -6  -2 -11    7.28    1.59
  -6   2 -11    9.04    1.67
   9   0  -1    1.59    0.94
   9   0  -1   -0.43    1.21
  -8  -1  -7    4.62    1.03
   8   1   7    4.31    1.45
   8   1   7    6.25    1.37
   8  -1   7    5.46    1.04
  -2  -3 -14    2.69    1.48
   2   3  14    3.83    2.08
  -2  -3 -14    3.85    0.98
   2  -6  -3    2.61    0.92
  -2  -6   3    2.82    0.92
   2  -6  -3    1.86    0.80
   2   6  -3    2.22    1.75
  -9   0  -1    5.91    1.28
   9   0   1    7.66    1.64
   5   5  -4    0.60    1.34
   5  -5  -4    1.37    0.93
   5   5  -4    1.18    1.96
  -5  -5   4    0.57    0.94
  -2  -6  -3    8.38    1.43
   2  -6   3    7.71    1.16
   2   6   3    5.60    2.21
  -2  -6  -3    7.63    1.24
   2   6   3   10.94    1.94
  -7  -1 -10    2.75    1.33
  -7   1 -10    3.36    1.30
   7   1  10    2.90    1.01
   7   1  10    2.40    1.52
   0  -5 -10    5.89    1.47
   0   5 -10    5.55    1.70
   0  -5 -10    3.39    1.03
   0   5  10    2.41    1.97
   6   1  12   12.42    1.70
   6   1  12   12.55    2.20
  -6   1 -12   12.29    1.89
  -6  -1 -12   10.62    1.85
   7  -3  -7    1.63    1.28
  -7  -3   7    1.70    1.31
   7  -3  -7    0.74    1.07
   7   3  -7   -0.06    1.22
   7   3  -7   -0.07    1.46
  -5  -5  -4    3.21    1.17
   5   5   4    2.04    1.41
  -5  -5  -4    1.11    0.99
  -5  -4   9    9.94    1.48
  -5   4   9    9.66    1.51
   5   4  -9   14.73    2.39
   5  -4  -9    8.88    2.11
   5   4  -9   15.80    2.52
   5  -4  -9   12.38    1.92
  -2   1  16   13.93    1.73
   2  -1 -16   13.31    1.85
   2   1 -16    7.65    1.63
   2  -1 -16   12.95    2.13
   9   0  -2    7.01    1.38
   9   0  -2    7.99    1.75
   7   2   9   14.93    1.95
   7  -2   9   17.63    1.85
   7   2   9   13.99    2.28
  -7  -2  -9   16.10    1.93
  -7  -2  -9   15.51    2.20
   4   2 -14    5.00    1.46
   4  -2 -14    3.32    1.39
   4   2 -14    2.31    1.45
   4  -2 -14    1.30    1.60
   0   6  -5    2.55    1.66
   0  -6  -5    3.09    1.11
   0  -6  -5    2.24    0.89
   0   6   5    3.41    1.27
   0   6   5    3.02    2.16
   0  -6   5    3.48    0.84
   4  -5  -7   -0.34    0.99
  -4  -5   7    0.66    0.83
  -4   5   7    0.02    0.86
   4  -5  -7   -0.06    1.34
   4   5  -7    0.99    1.41
   7   4   0   -0.66    2.00
   7  -4   0    1.12    0.77
  -7  -4   0    0.51    0.99
   7   4   0   -0.69    1.69
  -7  -4   0    0.19    0.85
   4   0 -15    0.00    1.26
   4   0 -15   -0.33    1.48
  -9   0  -2    2.11    1.14
   9   0   2    2.44    1.27
   9   0   2    0.58    0.84
   8   0  -8    1.40    1.19
   7   4  -1    1.83    1.71
   7  -4  -1    4.87    1.09
  -7  -4   1    2.85    0.91
   7   4  -1    3.05    1.51
   8  -2  -6   -0.64    1.04
   8   2  -6    0.48    1.55
   8   2  -6    0.22    0.91
   8   2  -6    0.46    1.26
   8  -2  -6    0.34    1.53
   1   5 -10    0.46    1.57
   1  -5 -10    0.83    1.10
  -1   5  10    0.22    1.22
   1  -5 -10    0.74    0.96
  -1   5  10   -1.30    2.03
  -7  -4  -1    0.57    1.11
   7  -4   1    0.96    0.82
  -7  -4  -1   -0.27    1.01
   7   4   1    1.55    1.75
   7   4   1   -0.09    1.37
   2   1  16    1.68    0.88
   2   1  16    1.49    1.46
  -2  -1 -16    0.87    1.31
  -2  -1 -16    0.23    1.16
   5   0 -14    6.08    1.40
   5   0 -14    3.25    1.57
   8  -3   0    0.31    1.10
   8   3   0    0.87    1.71
  -8  -3   0   -0.13    1.00
   8   3   0    0.07    0.84
   8  -3   0    0.13    1.04
  -1   5 -10    0.10    1.41
   1   5  10    0.95    1.25
   1   5  10   -0.77    2.15
  -1  -5 -10    1.43    1.07
   4   5   7    0.59    2.10
   4   5   7    1.81    1.29
  -4  -5  -7    2.28    0.98
  -7  -3  -7    4.48    1.37
  -7  -3  -7    7.14    1.38
   7   3   7    5.12    1.87
   7  -3   7    6.39    1.00
   7   3   7    5.38    1.46
   5   4   9    8.77    2.66
  -5  -4  -9    6.62    1.47
   5   4   9    9.03    1.81
  -5  -4  -9    9.08    1.37
   8  -3  -1   11.42    1.65
   8   3  -1    6.85    1.12
   8   3  -1   10.94    2.18
   8  -3  -1   11.81    1.76
   5  -2 -13    5.65    1.84
   5   2 -13    6.77    1.36
   5  -2 -13    9.27    1.61
  -5   2  13    8.04    1.40
   5   2 -13   10.41    2.12
   8   3   1    0.72    1.68
   8   3   1    0.99    0.86
   8  -3   1    0.65    0.88
  -8  -3  -1    0.29    0.99
  -9  -1   0    8.78    1.51
   9   1   0    9.07    1.72
   9  -1   0   10.77    1.76
   9   1   0    9.31    1.36
  -1  -6   5   10.34    1.33
   1   6  -5    9.22    1.99
  -1   6   5    7.05    2.47
   1  -6  -5    8.44    1.26
   1  -6  -5   11.56    1.66
   1   6   5    5.00    2.22
  -1  -6  -5    8.39    1.35
   1   6   5   13.61    1.96
  -1  -6  -5   12.83    1.58
  -1   6  -5    9.55    1.79
  -4  -2 -14    4.05    1.55
   4   2  14    3.88    1.05
   4   2  14    3.77    1.76
   7   4  -2    1.71    1.61
   7   4  -2   -0.09    1.47
   7  -4  -2    1.50    0.96
   7  -4  -2    1.15    1.14
   9   1  -1    0.28    0.87
   9  -1  -1    2.53    1.19
  -9  -1   1    2.56    1.22
   9   1  -1    1.24    1.62
   9  -1  -1    2.37    1.10
   6  -4  -7    0.60    1.26
   6   4  -7   -0.94    1.46
   6   4  -7    0.95    1.67
   6  -4  -7   -0.64    1.34
  -6  -4   7   -0.10    0.92
  -6   4   7    0.48    0.91
   9   0  -3    1.43    0.98
   9   0  -3    0.33    1.60
   2  -6  -4    7.60    1.17
   2  -6  -4    5.98    1.14
  -2  -6   4    6.39    1.01
   2   6  -4    8.61    2.19
   9  -1   1    6.00    1.41
   9   1   1    4.81    1.42
   9   1   1    5.90    1.21
  -9  -1  -1    6.75    1.35
  -8  -2  -6    7.65    1.35
  -8  -2  -6    6.88    1.53
   8  -2   6    6.06    1.00
   8   2   6    4.54    1.45
   8   2   6    5.88    1.38
   0   4 -13    2.91    1.45
   0  -4 -13    2.50    1.37
   0  -4 -13    1.99    0.95
   0   4  13    2.40    1.96
   7   4   2   -0.33    1.41
  -7  -4  -2   -0.02    1.11
   7  -4   2    0.43    0.78
  -7  -4  -2   -1.24    1.06
   7   4   2    1.52    2.05
  -2  -6  -4    7.45    1.19
   2   6   4    4.13    2.22
  -2  -6  -4    7.45    1.39
   2   6   4    5.45    1.39
  -4   0 -15    1.10    1.28
   8   3  -2    5.57    1.08
   8   3  -2    6.42    1.94
   8  -3  -2    3.97    1.13
   8   3  -2    4.95    1.63
  -8  -3   2    6.78    1.36
   8  -3  -2    6.03    1.41
   8   0   8    2.06    1.31
   8   0   8    1.28    0.81
   8   0   8    2.08    0.99
   3   6   0    7.05    2.37
  -3  -6   0   10.03    1.38
   3   6   0   13.73    2.18
   3  -2 -15    4.24    1.37
   3  -2 -15    2.70    1.68
  -3   2  15    3.82    1.17
  -6  -3  10    4.80    1.18
   6  -3 -10    4.27    1.61
   6   3 -10    6.59    1.55
   6   3 -10    5.46    1.86
  -6   3  10    4.13    1.01
   9   0   3    1.31    0.96
  -9   0  -3    0.45    1.08
   9   0   3    0.27    1.02
   3   6  -1    3.44    1.52
  -3  -6   1    3.03    0.85
   3   6  -1    3.42    2.00
   8   3   2    1.58    1.43
  -8  -3  -2    1.71    1.12
   8   3   2    3.18    1.77
   8  -3   2    1.77    0.80
   8   3   2    1.50    0.78
   3   6   1    2.56    2.17
  -3  -6  -1    4.91    1.19
   3   6   1    2.74    1.27
  -5   0 -14   -0.31    1.17
   5   5  -5    4.77    1.68
   5  -5  -5    3.29    1.20
   5  -5  -5    4.35    1.16
  -5  -5   5    6.83    1.18
   5   5  -5    5.93    2.12
   9  -1  -2   -0.65    1.00
   9   1  -2   -0.06    0.98
   9   1  -2   -1.00    1.36
   9  -1  -2    0.08    1.14
  -9  -1   2   -0.18    1.13
   6   4   7    0.69    2.24
   6  -4   7    1.96    0.64
  -6  -4  -7    3.11    1.23
  -6  -4  -7    1.68    1.16
   7   0 -11   -0.05    1.02
   7   0 -11    0.47    1.77
   5   2  13    6.74    1.23
   5   2  13    6.29    1.89
  -5  -2 -13    5.67    1.45
  -1   4  13   -0.63    1.53
  -1   4  13   -0.01    1.14
   1  -4 -13    1.11    1.34
   1   4 -13    3.42    1.48
   4  -1 -15    1.07    1.59
  -4   1  15    1.54    0.93
   4   1 -15    0.12    1.56
   4  -1 -15    1.79    1.27
  -9  -1  -2    4.55    1.25
   9  -1   2    5.12    1.30
   9   1   2    2.11    1.22
   9   1   2    4.00    1.03
   4   3 -13    3.47    1.57
  -4   3  13    3.73    1.20
   4   3 -13    1.50    1.39
   4  -3 -13    4.82    1.46
   8   1  -8    5.98    1.23
   8  -1  -8    4.87    1.90
   8  -1  -8    5.19    1.28
   8   1  -8    5.78    1.73
   0   2  16   23.93    2.70
   0  -2 -16   33.01    3.45
   0   2  16   21.19    2.99
   0  -2 -16   32.65    3.55
  -5  -5  -5    2.54    1.16
  -5  -5  -5    1.41    0.91
   5   5   5    1.67    1.54
  -1  -4 -13   -0.04    1.28
   1   4  13    0.44    2.01
  -1  -4 -13    0.14    0.86
  -1   4 -13    0.74    1.39
   7   4  -3    3.43    1.55
  -7  -4   3    4.30    1.18
   7  -4  -3    3.88    1.05
   7  -4  -3    6.23    1.43
   7   4  -3    4.51    1.72
   5   1 -14    3.71    1.60
   5   1 -14    4.88    1.22
   5  -1 -14    6.17    1.34
   5  -1 -14    8.44    2.13
  -3   4  12    5.21    1.33
  -3  -4  12    7.67    1.19
   3  -4 -12    7.67    1.55
   3  -4 -12    9.29    1.98
   3   0 -16   10.97    2.03
   3   0 -16    8.68    1.56
  -3  -5   9    5.26    0.96
   3  -5  -9    4.05    1.72
  -3   5   9    1.44    1.09
   3   5  -9    5.17    1.70
   3  -5  -9    4.71    1.19
   3   2  15   11.96    1.62
  -3  -2 -15   12.10    1.84
   3   2  15   11.22    2.07
  -4  -4  11    2.07    0.84
   4  -4 -11    1.45    1.37
   4  -4 -11    2.27    1.73
   4   4 -11    0.87    1.34
  -4   4  11    0.65    0.98
   3   6  -2    4.74    1.53
   3  -6  -2    5.29    0.95
  -3  -6   2    6.95    1.19
   3   6  -2    7.41    2.30
   3  -6  -2    5.07    1.31
   3   6   2    1.10    1.31
   3   6   2   -0.13    2.06
  -3  -6  -2    0.65    0.89
   6   3  10    8.52    1.54
  -6  -3 -10    7.45    1.23
   6   3  10   10.64    2.65
  -6  -3 -10    7.69    1.58
  -7  -4  -3    3.64    1.26
   7   4   3    1.70    1.44
   7   4   3    3.41    1.91
   7  -4   3    3.35    0.84
  -7  -4  -3    3.53    1.14
   8  -3  -3   16.05    2.18
   8   3  -3   10.61    2.12
  -8  -3   3   15.15    1.91
   8   3  -3   15.54    1.79
   8   3  -3   12.04    2.17
   8  -3  -3   16.51    2.03
   3   5   9    3.19    1.21
  -3  -5  -9    2.43    1.02
  -3  -5  -9    2.20    0.99
   3   5   9    0.03    2.33
  -3   5  -9    3.77    1.30
  -1   2  16    6.08    1.29
   1  -2 -16    4.04    1.65
   1  -2 -16    8.77    1.78
   9   0  -4   19.90    2.28
   9   0  -4   24.16    2.91
   0   6   6   -0.06    2.13
   0  -6  -6   -0.86    1.08
   0   6  -6    0.58    1.49
   0  -6  -6    0.48    0.89
   0   6   6    0.65    1.00
  -3   4 -12    3.56    1.21
   3   4  12    3.19    2.16
  -3  -4 -12    3.16    1.01
   3   4  12    1.65    1.13
  -3  -4 -12    3.96    1.41
   2   5 -10    2.27    1.46
   2  -5 -10    2.61    1.32
  -2   5  10    1.52    1.18
   9   1  -3   -0.10    0.92
   9  -1  -3   -0.09    1.12
   9  -1  -3   -0.04    1.17
   9   1  -3   -0.65    1.37
   6   0 -13   37.15    3.85
   6   0 -13   48.46    2.04
   6   0 -13   30.19    3.87
  -4  -3 -13    0.97    0.86
   4   3  13    2.42    1.04
  -4  -3 -13    2.97    1.43
  -3   3  14    1.09    1.04
   3  -3 -14    1.06    1.52
   3  -3 -14    1.57    1.30
   3   3 -14    0.39    1.25
  -8  -3  -3    2.68    1.02
  -8  -3  -3    3.60    1.37
   8  -3   3    2.77    0.84
   8   3   3    1.75    1.57
   8   3   3    3.04    1.69
   0   3  15   13.93    1.96
   0  -3 -15   13.23    1.91
   0   3  15   15.38    2.47
   4   1  15    6.16    1.09
   4   1  15   10.31    2.04
  -4  -1 -15    6.69    1.49
  -4   1 -15    9.19    1.61
  -1  -2 -16    0.67    1.25
   1   2  16    1.36    0.99
   1   2  16    0.44    1.75
  -4  -4 -11    3.28    1.03
   4   4  11    2.94    1.19
   4   4  11    4.06    2.50
  -4  -4 -11    5.12    1.51
  -3   0 -16    0.82    1.15
   8  -1   8   27.04    2.69
   8   1   8   22.69    2.50
  -8  -1  -8   25.32    2.85
   8   1   8   20.36    2.54
   7   0  11   12.70    1.94
  -7   0 -11   11.75    1.88
  -2  -5 -10    4.87    1.27
  -2  -5 -10    6.16    1.33
   2   5  10    4.70    2.12
  -2   5 -10    8.31    1.69
   2   5  10    7.28    1.53
   5   3 -12    4.05    1.80
   5  -3 -12    6.25    1.41
   5  -3 -12    4.31    1.94
  -5   3  12    7.19    1.34
   5   3 -12    4.49    1.56
   0   0  17   10.63    1.28
   0   0 -17   15.62    2.01
   9  -1   3   10.80    1.63
   9   1   3   11.92    1.52
  -9  -1  -3    8.83    1.30
   9  -1   3   11.01    1.44
   9   1   3   11.03    1.81
   2  -6  -5    3.59    1.10
  -2  -6   5    2.25    0.71
   2   6  -5    4.47    1.88
   2  -6  -5    4.16    0.99
   9   0   4    0.35    0.97
   9   0   4    0.83    0.85
  -5  -1 -14   13.32    1.90
  -5   1 -14   17.61    2.20
   5   1  14   15.09    1.74
   5   1  14   14.93    2.17
   7   3  -8    4.20    1.82
   7  -3  -8    1.17    1.34
  -7  -3   8    1.50    1.20
   7   3  -8    1.36    1.25
   2   6   5    0.98    1.31
  -2  -6  -5    0.94    0.89
   2   6   5   -1.37    1.91
  -2  -6  -5    1.59    1.12
   7   1 -11    1.95    1.62
   7   1 -11    1.11    1.00
   7  -1 -11    0.92    1.14
   7   1 -11    0.84    1.04
   3   6  -3    3.56    1.96
   3  -6  -3    5.12    1.38
   3  -6  -3    4.35    0.92
  -3  -6   3    4.75    0.95
   8  -2  -7    0.49    1.41
   8   2  -7    0.10    0.79
   8   2  -7    2.35    1.55
   8   2  -7    1.38    1.28
   8  -2  -7    1.40    1.14
   7  -2 -10    1.69    1.90
   7   2 -10   -0.12    1.61
   7  -2 -10   -0.68    1.12
   7   2 -10   -0.03    1.00
   1   6  -6    3.81    1.63
   1  -6  -6    2.75    0.99
  -1   6   6    0.67    2.15
   1  -6  -6    3.97    0.91
   6  -2 -12    3.82    1.31
   6   2 -12    3.10    1.57
  -6   2  12    1.88    0.94
   6   2 -12    2.11    1.10
   3   3  14    5.51    1.36
  -3  -3 -14    5.61    1.54
   3   3  14    3.54    2.02
  -3  -3 -14    5.52    1.19
  -3  -6  -3    2.86    1.01
   3   6   3    0.40    2.05
   3   6   3    4.97    1.62
   1   6   6   -1.31    1.93
  -1  -6  -6    3.63    1.15
   1   6   6    5.64    1.45
  -1  -6  -6    2.79    1.00
  -1   6  -6    3.81    1.76
   1  -3 -15   13.75    2.32
   1   3 -15   17.50    2.54
  -1   3  15   16.26    2.66
  -1   3  15   20.44    2.61
   1  -3 -15   21.07    2.75
   4  -5  -8    3.21    0.96
  -4  -5   8    4.80    0.98
   4  -5  -8    2.51    1.30
  -4   5   8    4.54    1.18
   7  -4  -4    7.04    1.60
   7   4  -4    4.72    1.60
   7   4  -4    6.67    1.96
   7  -4  -4    6.85    1.40
  -7  -4   4    8.16    1.51
   3  -1 -16    0.26    1.46
   3   1 -16    0.36    1.54
  -3   1  16    0.10    0.92
   3  -1 -16   -0.41    1.21
  -1  -3 -15   14.28    2.18
   1   3  15   17.84    2.40
   1   3  15    6.39    1.92
  -1  -3 -15   19.79    2.40
   1   0 -17    7.37    1.92
  -1   0  17    9.65    1.40
   1   0 -17    8.21    1.49
  -6   0 -13   52.26    5.74
   6   0  13   52.51    2.27
   8  -3  -4    3.60    1.23
   8   3  -4    3.86    1.65
   8   3  -4    4.50    1.83
   8  -3  -4    6.48    1.63
   5   3  12    7.75    2.27
  -5  -3 -12    8.69    1.47
   5   3  12    6.39    1.39
  -1   0 -17   10.06    1.75
   1   0  17    9.91    1.36
   2  -4 -13    4.54    1.47
   2   4 -13    4.70    1.64
  -2   4  13    3.01    1.21
  -2   4  13    1.13    1.60
  -7  -4  -4    0.47    0.99
   7   4   4    0.93    1.72
   7  -4   4    1.67    0.73
  -7  -4  -4    0.83    1.13
  -4  -5  -8    1.14    1.10
   4   5   8   -0.07    2.31
  -4  -5  -8    1.15    1.00
   4   5   8   -0.44    1.20
   5  -5  -6   14.88    1.96
   5   5  -6   13.52    2.48
  -5  -5   6   19.02    2.31
  -5   5   6   10.72    1.53
   5  -5  -6   16.53    2.51
   5   5  -6   16.11    2.51
  -7  -3  -8    6.16    1.64
   7  -3   8    4.43    0.88
   7   3   8    2.62    1.26
  -7  -3  -8    5.80    1.30
   7   3   8    3.12    1.80
   8   0  -9    1.22    1.05
   8  -2   7   -0.05    0.67
   8   2   7   -0.56    1.01
  -8  -2  -7   -0.35    1.00
   8   2   7    0.38    1.31
   5   4 -10    2.36    1.61
   5   4 -10    2.47    1.40
  -5  -4  10    1.32    0.82
  -5   4  10    1.71    0.96
   5  -4 -10    3.90    1.44
   5  -4 -10    1.18    1.47
   9   1  -4    0.59    1.45
   9  -1  -4    1.26    1.03
   9   1  -4    0.55    0.86
   9  -1  -4    1.18    1.41
   6   1 -13    3.49    1.68
   6  -1 -13    2.61    1.18
   6   1 -13    1.93    1.14
   6  -1 -13    2.11    1.75
   6  -4  -8    0.42    1.07
   6  -4  -8    1.63    1.44
   6   4  -8    1.38    1.34
   6   4  -8    1.58    1.39
  -6  -4   8    1.19    1.03
  -6   4   8   -0.32    0.79
   8   3   4    3.61    1.44
  -8  -3  -4    3.67    1.09
   8  -3   4    4.10    0.94
   8   3   4    1.52    1.68
  -8  -3  -4    3.34    1.29
   3   1  16    0.34    0.80
  -3  -1 -16    0.18    1.17
  -2  -4 -13    3.69    1.06
   2   4  13    2.34    2.08
  -2   4 -13    5.23    1.42
  -2  -4 -13    3.91    1.36
  -7   2 -10    0.60    1.29
   7   2  10   -0.11    0.94
  -7  -2 -10    0.61    1.47
   7   2  10    0.87    1.45
  -7  -1 -11    0.81    1.39
   7   1  11    1.00    1.48
  -7   1 -11    0.43    1.39
   7   1  11    1.15    0.94
  -6  -5   0    0.66    1.03
   6   5   0    0.95    1.47
   6   5   0    0.47    2.05
   6  -5   0    0.38    0.74
  -6  -5   0    0.56    0.82
   6   2  12    4.14    1.77
   6   2  12    4.84    1.21
  -6  -2 -12    3.19    1.35
   0   5  11    2.14    2.12
   0  -5 -11    4.23    1.31
   0  -5 -11    3.13    1.02
   0   5 -11    4.22    1.56
  -5  -5  -6    2.90    1.17
  -5  -5  -6    1.79    0.96
   5   5   6    1.88    1.28
   9   0  -5    3.55    1.14
   9   0  -5    4.25    1.83
   0  -1 -17    1.40    1.61
   0   1  17    0.06    0.81
   0  -1 -17   -0.47    1.05
   6  -5  -1    1.27    0.86
   6   5  -1    2.09    1.98
   6   5  -1    1.73    1.51
  -6  -5   1    0.49    0.99
  -2   2  16    0.71    1.02
   2  -2 -16    0.98    1.41
   2  -2 -16    1.65    1.80
   9  -1   4   15.91    2.01
   9   1   4   15.23    2.21
   9   1   4   16.51    2.08
   9  -1   4   13.03    1.85
  -9  -1  -4   15.73    2.09
   6   5   1    1.12    1.42
  -6  -5  -1    1.23    0.92
   6  -5   1    0.97    0.74
   6   5   1    1.36    2.23
   3   6  -4    5.20    1.95
   3  -6  -4    6.90    1.18
   3  -6  -4    8.49    1.68
  -3  -6   4   10.13    1.48
   5   4  10    1.35    1.22
   5   4  10   -0.25    2.03
  -5  -4 -10   -0.69    1.21
  -5  -4 -10    0.87    0.94
   3   6   4    1.56    2.47
  -3  -6  -4    1.91    1.01
  -3  -6  -4    2.44    0.91
   3   6   4    0.91    1.26
  -6  -4  -8    8.80    1.61
   6   4   8    7.21    1.70
  -6  -4  -8    9.78    1.59
   6   4   8    9.38    2.42
  -1   5  11    1.23    2.14
   1   5 -11    1.93    1.52
   1  -5 -11    1.35    0.91
   1  -5 -11    2.36    1.22
  -1   5  11    0.83    1.21
   2   2  16    4.25    1.68
   2   2  16    5.40    1.19
  -2  -2 -16    4.66    1.55
   8   0   9   10.37    1.57
  -8   0  -9    6.79    1.51
   8   0   9    9.38    1.72
   9   0   5    0.20    1.06
   1  -1 -17    1.27    1.75
  -1   1  17    2.63    0.90
   1  -1 -17    1.04    1.22
  -6  -5   2    0.31    0.92
   6   5  -2   -0.11    2.00
   6  -5  -2   -0.58    0.84
   6   5  -2    0.28    1.43
   1   5  11    0.40    1.13
  -1  -5 -11    0.96    1.28
  -1   5 -11    0.98    1.31
   1   5  11    1.05    1.98
  -1  -5 -11    1.00    0.96
  -6   1 -13    6.96    1.52
  -6  -1 -13    6.30    1.52
   6   1  13    6.52    1.19
   6   1  13    6.38    1.71
   6   5   2    2.59    1.38
   6   5   2    1.95    2.23
  -6  -5  -2    3.93    1.11
   6  -5   2    4.13    0.90
   1   1  17    9.68    1.43
  -1  -1 -17    8.85    1.68
  -1  -1 -17   11.29    2.12
  -7  -4   5    4.04    1.18
   7   4  -5    3.42    1.76
   7  -4  -5    6.10    1.56
   7   4  -5    3.32    1.65
   7  -4  -5    5.41    1.38
   9  -2   0    6.66    1.47
   9   2   0    5.39    1.09
   9  -2   0    7.38    1.39
   9   2   0    6.03    1.72
  -9  -2   0    5.20    1.23
   0   6   7   -0.87    2.07
   0   6  -7   -0.14    1.59
   0   6   7    1.75    1.24
   0  -6  -7    0.94    0.96
   0  -6  -7    1.98    1.11
   2   6  -6    4.60    1.67
   2  -6  -6    6.03    1.18
   2  -6  -6    8.37    1.43
  -2   6   6    6.09    1.44
  -2  -6   6    8.01    1.26
   2  -3 -15    6.09    1.83
   2  -3 -15    9.74    1.74
  -2   3  15    9.40    1.64
  -2   3  15    6.86    1.93
   8  -1  -9   -1.26    1.22
   8   1  -9   -0.13    1.69
   8  -1  -9    1.27    1.57
   8   1  -9   -1.04    0.89
   9   2  -1   -0.68    1.37
  -9  -2   1   -1.00    1.03
   9   2  -1   -0.12    0.85
   9  -2  -1   -0.82    1.16
   9  -2  -1    1.01    1.10
   2   6   6    7.78    2.40
  -2  -6  -6    6.54    1.21
   2   6   6    4.84    1.45
  -2   6  -6    8.39    1.87
  -2  -6  -6    5.97    1.24
   2   0 -17    0.91    1.24
  -2   0  17    0.86    0.70
   2   0 -17    1.18    1.39
   9  -2   1    6.06    1.38
   9  -2   1    5.99    1.21
  -9  -2  -1    4.76    1.18
   9   2   1    6.11    1.66
   9   2   1    7.21    1.27
   8   3  -5    1.47    1.39
   8  -3  -5    1.49    1.10
   8   3  -5    1.47    1.57
   8  -3  -5    0.83    1.18
  -2  -3 -15    6.90    1.59
   2   3  15    6.69    2.19
   2   3  15    4.51    1.22
  -2  -3 -15    5.58    1.20
  -7  -4  -5    8.66    1.52
   7  -4   5    7.15    1.05
   7   4   5    5.01    2.18
  -7  -4  -5    6.70    1.36
   6   3 -11    4.97    1.90
  -6   3  11    8.73    1.50
   6   3 -11    7.35    1.63
   6  -3 -11    4.83    1.84
   6  -3 -11    9.55    1.70
   9  -1  -5    0.34    1.38
   9   1  -5   -0.44    1.53
   9   1  -5    0.31    1.02
   9  -1  -5   -1.02    1.13
   1  -6  -7    5.49    1.31
   1  -6  -7    3.47    0.97
   1   6  -7    5.16    1.66
  -1   6   7    4.09    2.22
   9   2  -2    0.48    0.89
   9  -2  -2    0.78    1.10
   9   2  -2    0.43    1.60
  -9  -2   2    1.37    1.23
   9  -2  -2    1.82    1.17
  -3   5  10    7.00    1.49
   3   5 -10    7.79    1.91
   3  -5 -10    4.89    1.29
   3  -5 -10    8.22    1.95
  -2   0 -17    7.05    1.52
  -1  -6  -7   17.81    2.31
   1   6   7   21.20    3.03
   1   6   7   15.82    3.01
  -1   6  -7   25.50    3.23
  -1  -6  -7   27.75    3.20
  -6  -5   3    0.74    0.95
   6  -5  -3    0.46    0.87
   6   5  -3   -0.18    2.05
   6   5  -3   -0.44    1.37
   8   3   5    0.81    1.33
  -8  -3  -5    0.23    0.98
  -8  -3  -5    0.79    1.37
   8  -3   5    0.66    0.74
   8   3   5   -1.20    1.60
   4  -2 -15    0.97    1.57
   4   2 -15   -0.69    1.31
   4   2 -15    1.77    1.65
   4  -2 -15    1.96    1.33
  -9  -2  -2    6.34    1.29
   9   2   2    6.78    1.80
   9  -2   2    3.05    0.89
   9   2   2    4.69    1.02
   9   2   2    3.35    1.35
   8  -2  -8    5.19    1.34
   8   2  -8    4.58    1.45
   8  -2  -8    3.30    1.49
   8   2  -8    3.02    1.79
  -4  -6   0   -0.18    1.03
   4   6   0   -0.00    2.01
   4   6   0    0.40    1.50
  -6  -5  -3    5.62    1.25
   6   5   3    3.15    1.50
  -6  -5  -3    3.83    1.09
   6  -5   3    5.14    0.97
   6   5   3    4.19    2.33
   8   1   9    2.87    1.45
   8   1   9    3.65    1.04
   8  -1   9    3.38    0.89
  -8  -1  -9    3.28    1.38
  -5   2  14    2.69    1.02
   5  -2 -14    1.09    1.71
   5  -2 -14    2.59    1.24
   5   2 -14    3.08    1.73
   5   2 -14    2.87    1.29
  -3  -5 -10   14.05    1.96
   3   5  10    9.95    2.58
  -3  -5 -10   14.15    2.05
   3   5  10   14.72    2.26
  -9  -1  -5   16.67    2.14
   9  -1   5   10.35    1.44
   9   1   5   15.20    2.17
   9   1   5   14.01    1.82
  -4  -6   1    0.80    0.86
   4   6  -1    1.61    2.32
   4   6  -1    0.29    1.23
   7   0 -12    3.27    1.67
   7   0 -12    6.68    1.47
   3  -6  -5    3.17    0.92
  -3   6   5    2.82    0.99
  -3  -6   5    3.38    0.85
   3   6  -5    5.94    2.27
   3  -6  -5    2.82    1.17
   4   6   1    2.34    2.35
  -4  -6  -1    0.73    0.94
   4   6   1    1.22    1.28
   5  -5  -7    1.84    1.43
   5  -5  -7    1.60    1.07
   5   5  -7    2.82    1.54
   5   5  -7    1.09    1.67
  -5  -5   7    1.85    0.81
  -5   5   7    2.47    0.98
  -7  -3   9    1.32    1.29
   7   3  -9    0.73    1.38
   7  -3  -9    0.04    1.64
   7   3  -9    2.06    1.78
   9   0  -6    0.22    1.10
   9   0  -6   -1.28    1.69
   5   0 -15    1.13    1.53
   5   0 -15    2.87    1.27
  -3  -6  -5    2.51    1.03
   3   6   5    1.85    1.29
  -3  -6  -5    2.61    0.85
   3   6   5    1.75    2.01
   6   3  11    0.46    1.08
   6   3  11    3.71    2.12
  -6  -3 -11    1.82    0.99
   4   0 -16    3.62    1.76
   4   0 -16    2.46    1.27
   0   4  14    4.34    1.87
   0   4 -14    7.91    1.93
   0   4  14    6.07    1.54
  -4  -4  12    3.11    0.90
   4  -4 -12    3.65    1.65
   4  -4 -12    2.68    1.19
   4   4 -12    1.98    1.38
  -4   4  12    2.03    1.03
   4  -5  -9    3.40    1.20
  -4  -5   9    3.31    0.90
   4  -5  -9    2.08    1.37
  -4   5   9    2.16    1.05
  -2   5  11    5.12    1.47
   2   5 -11    5.86    1.76
   2  -5 -11    5.28    1.33
   2  -5 -11    4.39    1.61
   9   2  -3    5.24    1.78
  -9  -2   3    7.86    1.60
   9  -2  -3    5.27    1.52
   9   2  -3    6.91    1.26
  -2   1  17    9.21    1.43
   2  -1 -17    9.52    1.72
   2  -1 -17    9.76    2.13
   4   6  -2    7.12    1.71
   4  -6  -2    3.57    0.87
   4   6  -2    1.50    1.94
  -4  -6   2    4.20    1.01
  -5  -5  -7    7.11    1.43
  -5  -5  -7    6.64    1.34
   5   5   7    6.47    1.61
  -4  -2 -15    1.04    1.41
   4   2  15   -0.46    1.74
   4   2  15   -0.61    0.73
   4   6   2    0.84    1.31
  -4  -6  -2    2.26    1.02
   4   6   2    1.82    1.98
   8   2   8    0.23    1.01
   8  -2   8    0.93    0.65
   8   2   8    1.78    1.64
  -8  -2  -8    1.12    1.06
  -3   4  13    2.57    1.11
   3  -4 -13    4.57    1.48
   2   5  11    7.87    1.61
  -2  -5 -11    5.04    1.37
  -2   5 -11    7.01    1.54
   2   5  11    3.13    2.11
  -2  -5 -11    6.58    1.37
   9   2   3    1.39    1.30
   9   2   3    1.45    0.91
   9  -2   3    1.00    0.86
   9   2   3    0.75    1.27
  -9  -2  -3    0.65    1.03
   9   0   6   -0.31    0.96
   5   2  14    9.49    1.09
   5   2  14    8.42    1.94
  -5  -2 -14   10.19    1.60
  -4  -5  -9    9.41    1.69
   4   5   9    6.38    2.44
   4   5   9    9.80    1.91
  -4  -5  -9    5.71    1.27
  -6  -5   4   13.54    1.87
   6   5  -4    4.04    1.80
   6  -5  -4   10.58    1.84
   6   5  -4    9.97    2.12
   6  -5  -4   12.82    1.77
   1  -4 -14    4.34    1.64
  -1   4  14    5.33    1.93
   1   4 -14    3.55    1.47
   7   3   9    1.14    1.30
  -7  -3  -9    0.96    1.09
   7   3   9    1.18    1.98
   7  -3   9    1.08    0.69
  -7  -3  -9    1.20    1.36
   4   3 -14    0.14    1.40
   4  -3 -14   -0.38    1.50
  -4   3  14    1.07    1.04
   4  -3 -14    0.13    1.16
  -2  -1 -17    2.60    1.26
   2   1  17    1.59    0.79
   7   4  -6    1.58    1.61
  -7  -4   6    1.03    1.05
   7  -4  -6    1.24    1.14
   7  -4  -6    1.78    1.21
   7   4  -6    3.75    1.64
   7  -2 -11   -0.59    1.77
   7  -2 -11    0.12    1.26
   7   2 -11    0.15    1.76
   7   2 -11    0.67    1.19
  -4  -4 -12    0.72    1.24
  -4  -4 -12    3.00    1.09
   4   4  12    1.29    2.12
   4   4  12    1.36    1.11
   1   4  14    2.73    1.33
  -1   4 -14    3.83    1.60
   1   4  14   -0.33    1.77
  -1  -4 -14    0.89    0.88
  -1  -4 -14    2.26    1.35
   7   0  12    3.93    1.44
  -7   0 -12    2.85    1.40
  -5   0 -15    2.36    1.24
  -6  -4   9    1.21    1.03
  -6   4   9    0.33    0.85
   6  -4  -9    1.19    1.12
   6  -4  -9    2.56    1.50
   6   4  -9    1.82    1.68
   6   4  -9    2.91    1.70
  -4   0 -16    7.11    1.35
  -6  -5  -4   10.06    1.26
   6   5   4    7.05    1.49
   6   5   4    7.94    2.50
  -6  -5  -4    8.00    1.08
  -8  -3   6    1.17    1.33
   8   3  -6    0.37    1.60
   8  -3  -6    0.80    1.22
   8  -3  -6    0.25    1.20
   8   3  -6    0.83    1.60
   3   4  13   -0.86    2.00
  -3   4 -13    1.51    1.29
  -3  -4 -13    1.01    1.08
   3   4  13    1.16    1.17
  -3  -4 -13    1.18    1.28
   8   0 -10    5.96    1.26
  -3   2  16    1.85    1.00
   3  -2 -16    3.97    1.34
   3  -2 -16    4.60    1.68
   7   1 -12   -0.25    1.00
   7   1 -12    0.58    1.58
   7   1 -12    0.56    1.04
   7  -1 -12    0.70    1.23
   7  -1 -12    1.61    1.58
  -2   6   7    5.27    1.32
   2  -6  -7    5.37    1.05
   2   6  -7    2.11    1.55
   9   1  -6    1.44    0.94
   9   1  -6    2.27    1.72
   9  -1  -6    1.83    1.59
   9  -1  -6    1.45    1.07
   4   6  -3    0.47    1.24
   4   6  -3    0.61    1.77
   4  -6  -3    1.32    0.75
  -4  -6   3    1.03    0.80
   5   1 -15    2.26    1.51
   5  -1 -15    1.36    1.64
   5  -1 -15    1.58    1.27
   5   1 -15    1.41    1.03
  -5   3  13    2.04    1.00
   5   3 -13    0.76    1.69
   5   3 -13    0.52    1.26
   5  -3 -13    2.94    1.27
  -7  -4  -6    4.36    1.19
   7   4   6    4.14    1.56
  -7  -4  -6    3.41    1.30
   7  -4   6    2.14    0.67
   7   4   6    0.27    2.17
   2   6   7    1.45    2.01
  -2   6  -7    3.60    1.54
  -2  -6  -7    2.73    1.03
   2   6   7    3.37    1.35
   6   0 -14   16.89    1.39
   6   0 -14   18.33    1.63
   6   0 -14   21.00    2.14
   4   6   3   -0.07    2.02
  -4  -6  -3    1.19    1.04
   4   6   3    1.32    1.50
  -4  -3 -14   12.03    1.18
  -4  -3 -14   10.63    1.49
   4   3  14   13.25    1.34
   4  -1 -16    3.75    1.20
   4  -1 -16    2.87    1.74
   4   1 -16    3.52    1.70
  -4   1  16    1.89    0.94
   5   4 -11    4.88    1.66
   5  -4 -11    6.72    1.45
   5  -4 -11    4.15    1.62
  -5   4  11    5.30    1.21
   5   4 -11    4.09    1.55
  -5  -4  11    5.35    1.00
   9  -2  -4    5.25    1.46
   9   2  -4    7.43    1.08
  -9  -2   4    6.42    1.29
   0   6   8    1.14    2.23
   0  -6  -8    0.89    1.03
   0   6  -8    0.79    1.59
   0  -6  -8    1.13    1.03
   6   2 -13    1.97    1.07
   6   2 -13    0.85    1.78
   6  -2 -13    0.73    1.10
  -6  -4  -9   11.75    1.23
  -6  -4  -9   14.71    1.66
   6   4   9   10.37    2.43
   6   4   9   15.25    1.65
   8  -3   6    1.45    0.65
   8   3   6    2.06    1.48
  -8  -3  -6    2.51    1.12
  -8  -3  -6    0.95    1.30
   8   3   6    1.54    1.25
  -3  -2 -16    1.50    1.42
   3   2  16    0.80    1.71
   3   2  16    1.07    0.91
  -7   2 -11    2.12    1.29
  -7  -2 -11    1.72    1.38
   7   2  11    2.12    1.08
   7   2  11    1.60    1.66
   3  -3 -15   -0.02    1.54
   3  -3 -15    0.79    1.45
   3   3 -15    1.50    1.39
   3  -6  -6    3.18    0.85
   3  -6  -6    3.27    1.23
  -3  -6   6    4.67    0.87
   3   6  -6    5.25    2.01
  -3   6   6    3.36    1.05
   0  -2 -17    1.55    1.24
   0  -2 -17   -0.55    1.40
   0   2  17    1.10    1.56
   0   2  17    1.92    1.02
   9   1   6    1.46    0.88
   9  -1   6    0.89    0.83
   9   1   6   -0.45    1.11
  -9  -2  -4    2.53    0.98
   9   2   4    1.71    1.28
   9  -2   4    2.22    0.83
   9   2   4    0.79    0.87
   9   2   4    1.88    1.35
   3   0 -17   12.51    1.44
   3   0 -17   12.82    1.90
  -8   0 -10    2.83    1.32
   8   0  10    2.73    1.28
   3   6   6    1.34    2.21
   3   6   6    1.26    1.27
  -3  -6  -6    0.42    0.93
   5   3  13   -0.18    1.89
   5   3  13    3.42    1.05
  -5  -3 -13    2.35    0.91
   1  -6  -8    0.36    1.05
   1   6  -8    1.43    1.43
   1  -6  -8    1.07    0.86
   0   5  12    0.00    2.05
   0  -5 -12    0.49    0.94
   0  -5 -12    1.11    1.38
   0   5 -12    0.71    1.43
  -5  -4 -11    6.25    1.35
   5   4  11    6.06    1.41
  -5  -4 -11    8.38    1.21
   7   1  12    1.16    1.38
  -7   1 -12    1.76    1.42
  -7  -1 -12   -0.04    1.34
   7   1  12    1.96    0.89
  -5  -1 -15    6.20    1.31
   5   1  15    7.48    1.70
  -5   1 -15    6.65    1.25
   5   1  15    5.31    0.82
   1   6   8    2.22    1.13
  -1   6  -8    3.83    1.43
   1   6   8    0.35    2.23
  -1  -6  -8    3.62    1.06
   0  -3 -16    3.10    1.41
   0   3  16    1.26    1.85
   0   3  16    2.86    1.20
   0  -3 -16    1.98    1.69
   9   0  -7    1.02    1.56
   9   0  -7    1.58    1.15
  -4  -1 -16    6.79    1.47
   4   1  16    5.51    1.52
   8   1 -10   -0.19    1.59
   8  -1 -10    1.44    1.65
   8  -1 -10    1.89    1.11
   8   1 -10    2.02    1.07
   6   5  -5    2.54    1.71
   6   5  -5    2.83    1.90
  -6  -5   5    3.26    1.05
   6  -5  -5    2.56    1.25
   6  -5  -5    2.74    0.91
  -3  -3 -15    1.60    1.34
   3   3  15    0.51    1.85
  -3  -3 -15   -0.15    0.82
  -1   2  17    0.39    1.03
   1  -2 -17   -0.49    1.34
   1  -2 -17    1.70    1.71
  -6   0 -14   43.02    2.06
   2   4 -14    4.10    1.54
  -2   4  14    4.96    1.31
   2  -4 -14    3.94    1.52
  -4  -6   4    4.73    0.87
   4  -6  -4    7.42    1.38
   4   6  -4    6.97    2.20
   4  -6  -4    7.88    0.97
  -6  -2 -13    2.53    1.55
   6   2  13    3.81    1.02
   6   2  13    2.92    1.84
  -1  -2 -17    1.97    1.27
  -1  -2 -17    2.93    1.54
   1   2  17    2.55    0.99
   1   2  17    4.28    1.81
   5   5  -8    2.24    1.47
   5  -5  -8    1.25    1.00
  -5  -5   8    1.77    0.83
  -5   5   8    0.87    0.85
   5  -5  -8    2.53    1.48
   5   5  -8    1.10    1.58
  -3   0 -17    0.03    1.30
   6   1 -14    1.79    1.14
   6   1 -14    3.32    1.56
   6  -1 -14    2.18    1.35
   6  -1 -14    0.79    1.63
   1  -5 -12    2.20    1.20
  -1   5  12    1.53    1.20
  -1   5  12    2.95    1.78
   1   5 -12    1.79    1.54
   6   5   5    8.59    1.65
  -6  -5  -5    9.94    1.22
  -6  -5  -5    9.24    1.25
   6   5   5    6.70    2.50
  -4  -6  -4    2.24    1.07
   4   6   4    2.38    2.18
   4   6   4    4.67    1.45
   8   2  -9    3.67    1.78
   8  -2  -9    2.13    1.61
   8   2  -9    2.82    1.28
   8  -2  -9    4.25    1.25
  -1   3  16    4.08    1.17
  -1   3  16    3.73    1.66
   1   3 -16    7.60    1.62
   1  -3 -16    6.02    1.37
   1  -3 -16    6.74    1.76
  -2  -4 -14    2.31    1.29
  -2   4 -14    3.28    1.55
   2   4  14    3.05    2.21
  -2  -4 -14    3.38    1.04
   1   5  12    0.27    1.99
  -1   5 -12    3.82    1.42
  -1  -5 -12    3.44    1.32
  -1  -5 -12    1.89    1.05
   1   3  16    6.45    1.18
  -1  -3 -16   10.95    1.69
   1   3  16    5.43    1.63
   9   0   7    9.63    1.18
   9   0   7   11.58    1.11
  -9  -2   5   -0.54    1.29
   9   2  -5   -0.05    0.95
   9  -2  -5    1.04    1.41
   9  -2  -5    0.89    1.21
   7  -4  -7    3.78    1.49
   7   4  -7    2.72    1.47
   7  -4  -7    4.38    1.26
   7   4  -7    3.42    1.54
  -7  -4   7    4.96    1.19
  -7   4   7    4.01    0.93
   5   5   8    1.71    1.32
  -5  -5  -8    1.49    1.01
  -5  -5  -8    2.09    1.13
   0   0 -18    1.31    1.12
   0   0  18    0.89    0.64
   3  -5 -11    6.65    1.80
   3  -5 -11    6.24    1.28
   3   5 -11    8.40    1.77
  -3   5  11    8.26    1.28
   3  -1 -17    1.74    1.71
   3   1 -17    0.72    1.59
   3  -1 -17    1.96    1.11
  -3   1  17    1.87    0.97
   8   1  10    1.50    1.41
  -8   1 -10    3.34    1.44
   8   1  10    2.32    1.04
  -8  -1 -10    3.52    1.54
   8   3  -7    1.53    1.37
   8   3  -7   -0.23    1.68
   8  -3  -7    1.81    1.52
  -8  -3   7    3.31    1.35
   8  -3  -7    4.80    1.33
   7  -3 -10    0.48    1.51
   7  -3 -10    1.03    1.30
   7   3 -10    1.35    1.81
  -7  -3  10    1.10    1.12
   7   3 -10    1.05    1.20
   6  -3 -12    1.49    1.55
   6   3 -12   -0.36    1.49
   6   3 -12    1.87    1.16
   6  -3 -12    2.43    1.22
  -6   3  12    1.30    0.89
   9   1  -7    4.68    1.14
   9  -1  -7    2.10    1.47
   9  -1  -7    2.80    1.15
   8   2   9    1.32    1.29
   8   2   9    1.18    1.03
   8  -2   9    1.17    0.68
   9  -2   5    0.66    0.77
   9   2   5    0.39    1.28
  -9  -2  -5    0.56    0.99
   9   2   5   -0.43    1.13
   9   2   5   -0.42    0.97
   8   4   0    3.67    1.96
  -8  -4   0    4.66    1.12
   8   4   0    2.14    1.67
   8  -4   0    2.24    0.84
  -8  -4   0    4.08    1.10
  -4  -5  10    3.40    0.81
   4  -5 -10    2.27    1.29
  -4   5  10    3.59    1.10
   4  -5 -10    0.64    1.36
   3   5  11    3.44    2.24
   3   5  11    1.62    1.18
  -3  -5 -11    3.99    1.16
  -3  -5 -11    2.49    1.16
   1   0 -18    3.36    1.24
  -1   0  18    3.99    0.83
   6   1  14    3.00    0.87
  -6   1 -14    3.98    1.38
  -6  -1 -14    1.95    1.43
   6   1  14    0.90    1.50
   7  -4   7    1.38    0.64
  -7  -4  -7    2.11    1.31
  -7  -4  -7    2.86    1.14
   7   4   7    3.32    1.38
   7   4   7    1.71    2.13
   8   4  -1    5.24    1.49
   8   4  -1    6.79    2.15
   8  -4  -1    8.32    1.10
  -8  -4   1    9.76    1.27
  -8  -4  -1    2.32    1.05
   8   4   1    1.54    1.53
   8  -4   1    1.80    0.79
   8   4   1    1.07    1.90
  -8  -4  -1    2.33    0.97
   2   6  -8    4.57    1.73
   2  -6  -8    4.25    1.07
  -2   6   8    4.91    1.35
  -3  -1 -17   10.83    1.54
   3   1  17    8.15    0.93
   1   0  18    3.24    0.70
  -1   0 -18    3.32    1.27
   8   3   7    4.80    1.65
  -8  -3  -7    4.04    1.04
   8   3   7    3.72    1.37
   8  -3   7    3.94    0.76
  -8  -3  -7    3.31    1.31
   2   6   8    0.64    1.12
  -2  -6  -8    1.31    0.91
   2   6   8    3.20    2.16
   4   6  -5    2.38    1.80
   4  -6  -5    2.58    0.79
   4  -6  -5    3.23    1.28
  -4  -6   5    2.82    0.92
   2  -2 -17    2.01    1.79
   2  -2 -17    2.23    1.40
  -2   2  17    0.55    0.89
  -4  -5 -10    0.47    1.12
  -4  -5 -10    1.86    1.18
   4   5  10   -1.12    2.38
   4   5  10    0.14    1.19
   3  -6  -7    0.09    0.79
   3  -6  -7    1.06    1.18
  -3  -6   7    0.25    0.65
   3   6  -7    1.07    1.84
  -3   6   7   -0.07    1.01
  -7  -3 -10    1.57    1.28
   7   3  10    1.64    2.10
  -7  -3 -10    1.86    0.96
   7   3  10    2.58    1.34
   8  -4  -2    3.56    0.95
   8   4  -2    5.03    1.76
   8   4  -2    6.70    1.77
   6   5  -6    1.24    1.97
   6  -5  -6    1.52    0.92
  -6  -5   6    2.44    0.97
   6  -5  -6    2.95    1.18
   6   5  -6    1.57    1.67
   6   3  12    2.06    1.23
  -6  -3 -12    1.86    0.89
   6   3  12   -0.18    1.71
   9  -1   7    0.94    0.82
   9   1   7    0.95    0.95
  -6   4  10    3.22    1.01
  -6  -4  10    3.01    1.04
   6   4 -10    2.45    1.72
   6   4 -10    2.11    1.62
   6  -4 -10    2.12    1.05
   6  -4 -10    1.09    1.50
  -4  -6  -5    8.04    1.13
   4   6   5    8.45    1.52
   4   6   5    3.06    2.17
   7   0 -13    1.83    1.13
   7   0 -13   -0.09    1.46
;

_shelx_hkl_checksum   65209

#==============================================================================
#     End of CIF
#==============================================================================
